# Supplementary material
Source: MDPI journal article supplement (https://www.mdpi.com/2073-4352/8/6/236)

# checkCIF/PLATON report

You have not supplied any structure factors. As a result the full set of tests cannot be run.

THIS REPORT IS FOR GUIDANCE ONLY. IF USED AS PART OF A REVIEW PROCEDURE FOR PUBLICATION, IT SHOULD NOT REPLACE THE EXPERTISE OF AN EXPERIENCED CRYSTALLOGRAPHIC REFEREE.

No syntax errors found.      CIF dictionary      Interpreting this report

## Datablock: wang1

---

|                 |                             |                              |
|-----------------|-----------------------------|------------------------------|
| Bond precision: | C-C = 0.0138 A              | Wavelength=0.71073           |
| Cell:           | a=14.631(4)                 | b=18.462(5)      c=15.946(4) |
|                 | alpha=90                    | beta=98.955(4)      gamma=90 |
| Temperature:    | 293 K                       |                              |
|                 | Calculated                  | Reported                     |
| Volume          | 4255(2)                     | 4255(2)                      |
| Space group     | P 21/c                      | P 1 21/c 1                   |
| Hall group      | -P 2ybc                     | -P 2ybc                      |
| Moiety formula  | C44 H34 Cd2 N8 O10, 2(H2 O) | C44 H34 Cd2 N8 O10, 2(H2 O)  |
| Sum formula     | C44 H38 Cd2 N8 O12          | C44 H40 Cd2 N8 O12           |
| Mr              | 1095.65                     | 1097.66                      |
| Dx,g cm-3       | 1.710                       | 1.714                        |
| Z               | 4                           | 4                            |
| Mu (mm-1)       | 1.075                       | 1.075                        |
| F000            | 2200.0                      | 2208.0                       |
| F000'           | 2194.49                     |                              |
| h,k,lmax        | 17,21,18                    | 17,21,18                     |
| Nref            | 7478                        | 7423                         |
| Tmin,Tmax       | 0.716,0.764                 |                              |
| Tmin'           | 0.702                       |                              |

Correction method= Not given

Data completeness= 0.993      Theta(max)= 24.998

R(reflections)= 0.0634( 5229)      wR2(reflections)= 0.1916( 7423)

S = 1.060      Npar= 605

---

The following ALERTS were generated. Each ALERT has the format

**test-name\_ALERT\_alert-type\_alert-level.**

Click on the hyperlinks for more details of the test.

---

### Alert level B

|                   |                      |           |                                 |                         |       |       |
|-------------------|----------------------|-----------|---------------------------------|-------------------------|-------|-------|
| PLAT220_ALERT_2_B | Non-Solvent          | Resd 1    | C                               | Ueq(max)/Ueq(min) Range | 8.4   | Ratio |
| PLAT241_ALERT_2_B | High                 | 'MainMol' | Ueq as Compared to Neighbors of | C32                     | Check |       |
| PLAT415_ALERT_2_B | Short Inter D-H..H-X | H1A       | ..H33                           | 1.96                    | Ang.  |       |
| PLAT420_ALERT_2_B | D-H Without Acceptor | O1        | --H1A                           | Please                  | Check |       |

---

### Alert level C

|                   |                                                  |                       |                                 |         |        |  |
|-------------------|--------------------------------------------------|-----------------------|---------------------------------|---------|--------|--|
| PLAT018_ALERT_1_C | _diffn_measured_fraction_theta_max               | .NE.                  | *_full                          | !       | Check  |  |
| PLAT041_ALERT_1_C | Calc. and Reported SumFormula                    | Strings               | Differ                          | Please  | Check  |  |
| PLAT043_ALERT_1_C | Calculated and Reported Mol. Weight              | Differ by             | ..                              | 2.01    | Check  |  |
| PLAT052_ALERT_1_C | Info on Absorption Correction Method             | Not Given             |                                 | Please  | Do !   |  |
| PLAT068_ALERT_1_C | Reported F000 Differs from Calcd (or Missing)... |                       |                                 | Please  | Check  |  |
| PLAT213_ALERT_2_C | Atom C42                                         | has ADP max/min Ratio | ....                            | 3.6     | prolat |  |
| PLAT222_ALERT_3_C | Non-Solv. Resd 1                                 | H                     | Uiso(max)/Uiso(min) Range       | 5.8     | Ratio  |  |
| PLAT241_ALERT_2_C | High                                             | 'MainMol'             | Ueq as Compared to Neighbors of | N7      | Check  |  |
| PLAT241_ALERT_2_C | High                                             | 'MainMol'             | Ueq as Compared to Neighbors of | C1      | Check  |  |
| PLAT241_ALERT_2_C | High                                             | 'MainMol'             | Ueq as Compared to Neighbors of | C4      | Check  |  |
| PLAT241_ALERT_2_C | High                                             | 'MainMol'             | Ueq as Compared to Neighbors of | C13     | Check  |  |
| PLAT241_ALERT_2_C | High                                             | 'MainMol'             | Ueq as Compared to Neighbors of | C41     | Check  |  |
| PLAT241_ALERT_2_C | High                                             | 'MainMol'             | Ueq as Compared to Neighbors of | C42     | Check  |  |
| PLAT242_ALERT_2_C | Low                                              | 'MainMol'             | Ueq as Compared to Neighbors of | N6      | Check  |  |
| PLAT242_ALERT_2_C | Low                                              | 'MainMol'             | Ueq as Compared to Neighbors of | C2      | Check  |  |
| PLAT242_ALERT_2_C | Low                                              | 'MainMol'             | Ueq as Compared to Neighbors of | C12     | Check  |  |
| PLAT242_ALERT_2_C | Low                                              | 'MainMol'             | Ueq as Compared to Neighbors of | C31     | Check  |  |
| PLAT242_ALERT_2_C | Low                                              | 'MainMol'             | Ueq as Compared to Neighbors of | C35     | Check  |  |
| PLAT242_ALERT_2_C | Low                                              | 'MainMol'             | Ueq as Compared to Neighbors of | C40     | Check  |  |
| PLAT334_ALERT_2_C | Small Aver. Benzene C-C Dist                     | C35                   | -C40                            | 1.37    | Ang.   |  |
| PLAT342_ALERT_3_C | Low Bond Precision on                            | C-C Bonds             | .....                           | 0.01377 | Ang.   |  |
| PLAT417_ALERT_2_C | Short Inter D-H..H-D                             | H1A                   | ..H2B                           | 2.11    | Ang.   |  |

---

### Alert level G

FORMU01\_ALERT\_1\_G There is a discrepancy between the atom counts in the  
\_chemical\_formula\_sum and \_chemical\_formula\_moiety. This is  
usually due to the moiety formula being in the wrong format.  
Atom count from \_chemical\_formula\_sum: C44 H40 Cd2 N8 O12  
Atom count from \_chemical\_formula\_moiety: C44 H38 Cd2 N8 O12

FORMU01\_ALERT\_2\_G There is a discrepancy between the atom counts in the  
\_chemical\_formula\_sum and the formula from the \_atom\_site\* data.  
Atom count from \_chemical\_formula\_sum: C44 H40 Cd2 N8 O12  
Atom count from the \_atom\_site data: C44 H38 Cd2 N8 O12

CELLZ01\_ALERT\_1\_G Difference between formula and atom\_site contents detected.

CELLZ01\_ALERT\_1\_G WARNING: H atoms missing from atom site list. Is this intentional?  
From the CIF: \_cell\_formula\_units\_Z 4  
From the CIF: \_chemical\_formula\_sum C44 H40 Cd2 N8 O12  
TEST: Compare cell contents of formula and atom\_site data

| atom | Z*formula | cif sites | diff |
|------|-----------|-----------|------|
| C    | 176.00    | 176.00    | 0.00 |
| H    | 160.00    | 152.00    | 8.00 |
| Cd   | 8.00      | 8.00      | 0.00 |
| N    | 32.00     | 32.00     | 0.00 |
| O    | 48.00     | 48.00     | 0.00 |

|                   |                                                  |        |        |
|-------------------|--------------------------------------------------|--------|--------|
| PLAT003_ALERT_2_G | Number of Uiso or Uij Restrained non-H Atoms ... | 2      | Report |
| PLAT004_ALERT_5_G | Polymeric Structure Found with Maximum Dimension | 2      | Info   |
| PLAT007_ALERT_5_G | Number of Unrefined Donor-H Atoms .....          | 6      | Report |
| PLAT012_ALERT_1_G | N.O.K. _shelx_res_checksum Found in CIF .....    | Please | Check  |
| PLAT072_ALERT_2_G | SHELXL First Parameter in WGHT Unusually Large   | 0.10   | Report |
| PLAT083_ALERT_2_G | SHELXL Second Parameter in WGHT Unusually Large  | 10.90  | Why ?  |
| PLAT186_ALERT_4_G | The CIF-Embedded .res File Contains ISOR Records | 2      | Report |

|                   |                                                  |           |      |       |
|-------------------|--------------------------------------------------|-----------|------|-------|
| PLAT199_ALERT_1_G | Reported _cell_measurement_temperature .....     | (K)       | 293  | Check |
| PLAT200_ALERT_1_G | Reported _diffrn_ambient_temperature .....       | (K)       | 293  | Check |
| PLAT301_ALERT_3_G | Main Residue Disorder .....                      | (Resd 1 ) | 2%   | Note  |
| PLAT343_ALERT_2_G | Unusual sp? Angle Range in Main Residue for      |           | C31  | Check |
| PLAT764_ALERT_4_G | Overcomplete CIF Bond List Detected (Rep/Expd) . |           | 1.12 | Ratio |
| PLAT794_ALERT_5_G | Tentative Bond Valency for Cd1 (II) .            |           | 2.06 | Info  |
| PLAT794_ALERT_5_G | Tentative Bond Valency for Cd2 (II) .            |           | 2.16 | Info  |
| PLAT860_ALERT_3_G | Number of Least-Squares Restraints .....         |           | 12   | Note  |
| PLAT933_ALERT_2_G | Number of OMIT Records in Embedded .res File ... |           | 6    | Note  |

---

0 **ALERT level A** = Most likely a serious problem - resolve or explain  
 4 **ALERT level B** = A potentially serious problem, consider carefully  
 22 **ALERT level C** = Check. Ensure it is not caused by an omission or oversight  
 20 **ALERT level G** = General information/check it is not something unexpected

11 ALERT type 1 CIF construction/syntax error, inconsistent or missing data  
 25 ALERT type 2 Indicator that the structure model may be wrong or deficient  
 4 ALERT type 3 Indicator that the structure quality may be low  
 2 ALERT type 4 Improvement, methodology, query or suggestion  
 4 ALERT type 5 Informative message, check

---

It is advisable to attempt to resolve as many as possible of the alerts in all categories. Often the minor alerts point to easily fixed oversights, errors and omissions in your CIF or refinement strategy, so attention to these fine details can be worthwhile. In order to resolve some of the more serious problems it may be necessary to carry out additional measurements or structure refinements. However, the purpose of your study may justify the reported deviations and the more serious of these should normally be commented upon in the discussion or experimental section of a paper or in the "special\_details" fields of the CIF. checkCIF was carefully designed to identify outliers and unusual parameters, but every test has its limitations and alerts that are not important in a particular case may appear. Conversely, the absence of alerts does not guarantee there are no aspects of the results needing attention. It is up to the individual to critically assess their own results and, if necessary, seek expert advice.

### Publication of your CIF in IUCr journals

A basic structural check has been run on your CIF. These basic checks will be run on all CIFs submitted for publication in IUCr journals (*Acta Crystallographica*, *Journal of Applied Crystallography*, *Journal of Synchrotron Radiation*); however, if you intend to submit to *Acta Crystallographica Section C* or *E* or *IUCrData*, you should make sure that full publication checks are run on the final version of your CIF prior to submission.

### Publication of your CIF in other journals

Please refer to the *Notes for Authors* of the relevant journal for any special instructions relating to CIF submission.

---

**PLATON version of 23/04/2018; check.def file version of 23/04/2018**

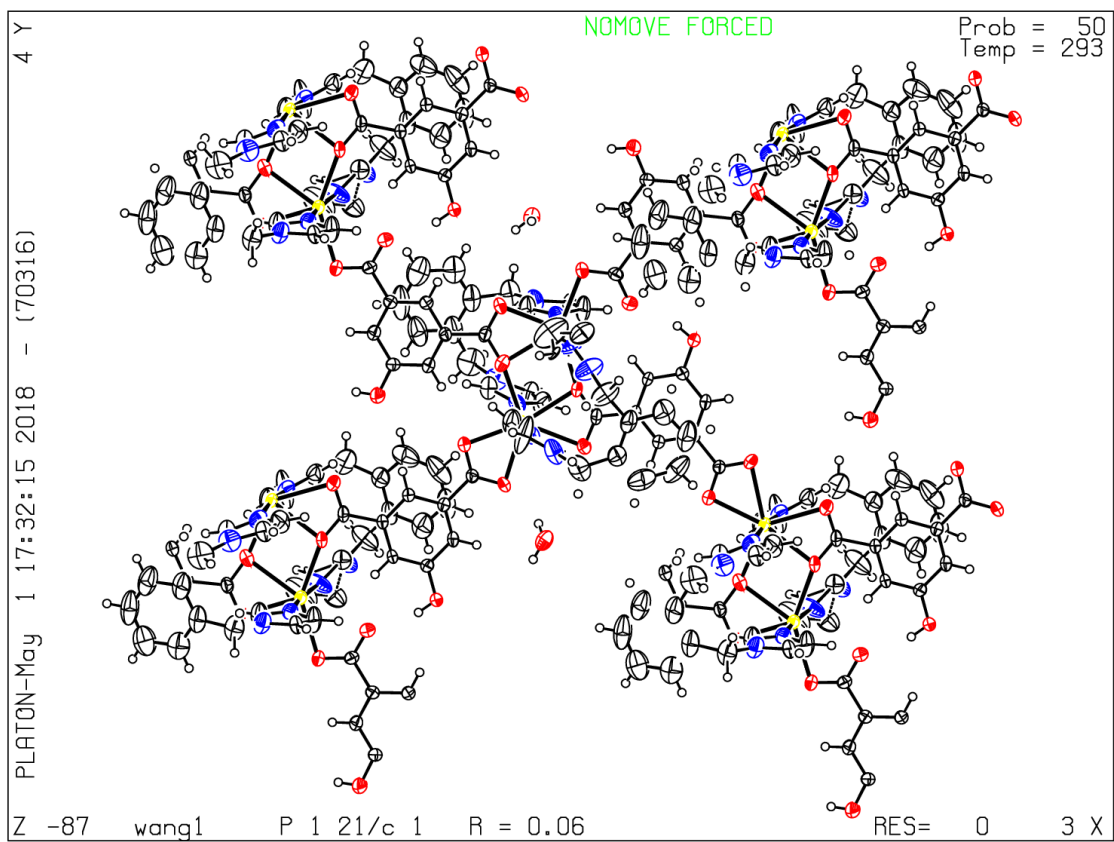

Supplement: s1 [file s1 › 2-checkcif.pdf]
