# Supplementary material
Source: MDPI journal article supplement (https://www.mdpi.com/2073-4352/8/6/236)
Supplement: s1 [file s1]

Archive with 9 entries (9 files):
- 1-checkcif.pdf
- 1.cif
- 2-checkcif.pdf
- 2.cif
- 3-checkcif.pdf
- 3.cif
- 4-checkcif.pdf
- 4.cif
- Supplementary Materials.doc
