# Supplementary material
Source: MDPI journal article supplement (https://www.mdpi.com/2073-4352/8/6/236)
Supplement: s1 [file s1 › 1.cif]

data_wang1
_audit_creation_date              2018-05-02
_audit_creation_method
;
Olex2 1.2
(compiled 2013.09.17 svn.r2790 for OlexSys, GUI svn.r4601)
;
_publ_contact_author_address      ?
_publ_contact_author_email        ?
_publ_contact_author_name         ''
_publ_contact_author_phone        ?
_chemical_name_common             ?
_chemical_name_systematic
;
 ? 
;
_chemical_formula_moiety          'C22 H20 N6 O4 Zn, H2 O'
_chemical_formula_sum             'C22 H22 N6 O5 Zn'
_chemical_formula_weight          515.85
_chemical_melting_point           'not measured'
loop_
  _atom_type_symbol
  _atom_type_description
  _atom_type_scat_dispersion_real
  _atom_type_scat_dispersion_imag
  _atom_type_scat_source
 'C' 'C' 0.0033 0.0016 'International Tables Vol C Tables 4.2.6.8 and 6.1.1.4'
 'H' 'H' 0.0000 0.0000 'International Tables Vol C Tables 4.2.6.8 and 6.1.1.4'
 'N' 'N' 0.0061 0.0033 'International Tables Vol C Tables 4.2.6.8 and 6.1.1.4'
 'O' 'O' 0.0106 0.0060 'International Tables Vol C Tables 4.2.6.8 and 6.1.1.4'
 'Zn' 'Zn' 0.2839 1.4301 'International Tables Vol C Tables 4.2.6.8 and 6.1.1.4'

_space_group_crystal_system       'triclinic'
_space_group_IT_number            2
_space_group_name_H-M_alt         'P -1'
_space_group_name_Hall            '-P 1'
loop_
  _space_group_symop_id
  _space_group_symop_operation_xyz
 1 'x, y, z'
 2 '-x, -y, -z'

_cell_length_a                    10.0751(6)
_cell_length_b                    10.2040(5)
_cell_length_c                    11.4148(5)
_cell_angle_alpha                 100.519(4)
_cell_angle_beta                  95.060(4)
_cell_angle_gamma                 106.233(5)
_cell_volume                      1095.68(10)
_cell_formula_units_Z             2
_cell_measurement_reflns_used     3860
_cell_measurement_temperature     293(2)
_cell_measurement_theta_max       25.00
_cell_measurement_theta_min       2.49
_exptl_absorpt_coefficient_mu     1.169
_exptl_absorpt_correction_T_max   0.845
_exptl_absorpt_correction_T_min   0.787
_exptl_absorpt_correction_type    'empirical'
_exptl_absorpt_process_details    SADABS
_exptl_crystal_colour             'colourless'
_exptl_crystal_density_diffrn     1.564
_exptl_crystal_density_meas       none
_exptl_crystal_density_method     'not measured'
_exptl_crystal_description        block
_exptl_crystal_F_000              532
_exptl_crystal_size_max           0.33
_exptl_crystal_size_mid           0.26
_exptl_crystal_size_min           0.25
_exptl_special_details
;
 ? 
;
_diffrn_reflns_av_R_equivalents   0.0279
_diffrn_reflns_av_unetI/netI      0.0469
_diffrn_reflns_limit_h_max        11
_diffrn_reflns_limit_h_min        -9
_diffrn_reflns_limit_k_max        10
_diffrn_reflns_limit_k_min        -12
_diffrn_reflns_limit_l_max        12
_diffrn_reflns_limit_l_min        -13
_diffrn_reflns_number             7339
_diffrn_reflns_theta_full         25.00
_diffrn_reflns_theta_max          25.00
_diffrn_reflns_theta_min          2.49
_diffrn_ambient_temperature       293(2)
_diffrn_detector_area_resol_mean  '9.00cm'
_diffrn_measured_fraction_theta_full 0.998
_diffrn_measured_fraction_theta_max 0.998
_diffrn_measurement_device_type   'CCD area detector'
_diffrn_measurement_method        'phi and omega scans'
_diffrn_radiation_monochromator   graphite
_diffrn_radiation_type            MoK\a
_diffrn_radiation_wavelength      0.71073
_diffrn_source                    'fine-focus sealed tube'
_diffrn_standards_decay_%         none
_diffrn_standards_interval_count  none
_diffrn_standards_interval_time   none
_diffrn_standards_number          none
_reflns_number_gt                 3115
_reflns_number_total              3860
_reflns_threshold_expression      >2sigma(I)
_computing_cell_refinement        'Siemens Smart'
_computing_data_collection        'Siemens Smart'
_computing_data_reduction         'Siemens Smart'
_computing_molecular_graphics
;
O. V. Dolomanov, L. J. Bourhis, R. J. Gildea, J. A. K. Howard and H. Puschmann,
OLEX2: a complete structure solution, refinement and analysis program.
J. Appl. Cryst. (2009). 42, 339-341.
;
_computing_publication_material
;
O. V. Dolomanov, L. J. Bourhis, R. J. Gildea, J. A. K. Howard and H. Puschmann,
OLEX2: a complete structure solution, refinement and analysis program.
J. Appl. Cryst. (2009). 42, 339-341.
;
_computing_structure_refinement
;
SHELX, G.M. Sheldrick, Acta Cryst.
(2008). A64, 112-122
;
_computing_structure_solution
'SUPERFLIP, J. Appl. Cryst. (2007) 40, 786-790'
_refine_diff_density_max          1.333
_refine_diff_density_min          -0.873
_refine_diff_density_rms          0.178
_refine_ls_extinction_coef        ?
_refine_ls_extinction_method      none
_refine_ls_goodness_of_fit_ref    1.087
_refine_ls_hydrogen_treatment     mixed
_refine_ls_matrix_type            full
_refine_ls_number_parameters      307
_refine_ls_number_reflns          3860
_refine_ls_number_restraints      0
_refine_ls_R_factor_all           0.1035
_refine_ls_R_factor_gt            0.0882
_refine_ls_restrained_S_all       1.087
_refine_ls_shift/su_max           0.000
_refine_ls_shift/su_mean          0.000
_refine_ls_structure_factor_coef  Fsqd
_refine_ls_weighting_details
'calc w=1/[\s^2^(Fo^2^)+(0.1859P)^2^+2.0272P] where P=(Fo^2^+2Fc^2^)/3'
_refine_ls_weighting_scheme       calc
_refine_ls_wR_factor_gt           0.2545
_refine_ls_wR_factor_ref          0.2773
_refine_special_details
;
 Refinement of F^2^ against ALL reflections.  The weighted R-factor wR and 
 goodness of fit S are based on F^2^, conventional R-factors R are based 
 on F, with F set to zero for negative F^2^. The threshold expression of 
 F^2^ > 2sigma(F^2^) is used only for calculating R-factors(gt) etc. and is 
 not relevant to the choice of reflections for refinement.  R-factors based 
 on F^2^ are statistically about twice as large as those based on F, and R- 
 factors based on ALL data will be even larger. 
;
_olex2_refinement_description
;
1. Others
 Fixed Uiso: H1A(0.262) H1B(0.262) H16A(0.153) H16B(0.153) H24(0.153)
 H1(0.054) H2(0.131) H3A(0.086) H3B(0.086) H4(0.104) H7(0.167) H9(0.156)
 H10(0.077) H12A(0.083) H12B(0.083) H13(0.074) H14(0.092) H15(0.089) H18(0.05)
 H25(0.034) H8A(0.239) H8B(0.239)
 Fixed X: H1A(0.1946) H1B(0.281) H16A(-0.2225) H16B(-0.2372) H24(0.5577)
 H1(0.0082) H2(-0.2508) H3A(-0.3031) H3B(-0.1567) H4(-0.099) H7(0.4227)
 H9(0.5595) H10(-0.4185) H12A(-0.5316) H12B(-0.463) H13(-0.0606) H14(-0.2521)
 H15(-0.0705) H18(0.2394) H25(0.1109) H8A(0.3353) H8B(0.4599)
 Fixed Y: H1A(0.4928) H1B(0.6321) H16A(0.2631) H16B(0.3983) H24(0.2923) H1(-
 0.1477) H2(0.0622) H3A(-0.1858) H3B(-0.1819) H4(0.1827) H7(0.0327) H9(0.1557)
 H10(-0.5764) H12A(-0.4109) H12B(-0.2808) H13(-0.3608) H14(-0.6845) H15(-
 0.5702) H18(0.2925) H25(0.3915) H8A(-0.0341) H8B(-0.0024)
 Fixed Z: H1A(0.3891) H1B(0.4213) H16A(-0.2088) H16B(-0.2304) H24(0.4443)
 H1(0.2896) H2(0.3904) H3A(0.4399) H3B(0.5029) H4(0.2626) H7(0.0131) H9(-
 0.1136) H10(0.1328) H12A(0.1877) H12B(0.2939) H13(0.44) H14(0.1781)
 H15(0.3305) H18(-0.0708) H25(0.1184) H8A(0.4323) H8B(0.3851)
;
_atom_sites_solution_hydrogens    geom
_atom_sites_solution_primary      iterative
_atom_sites_solution_secondary    difmap
loop_
  _atom_site_label
  _atom_site_type_symbol
  _atom_site_fract_x
  _atom_site_fract_y
  _atom_site_fract_z
  _atom_site_U_iso_or_equiv
  _atom_site_adp_type
  _atom_site_occupancy
  _atom_site_symmetry_multiplicity
  _atom_site_calc_flag
  _atom_site_refinement_flags
  _atom_site_disorder_assembly
  _atom_site_disorder_group
 Zn1 Zn 0.14960(8) 0.08681(7) 0.12746(6) 0.0382(4) Uani 1 1 d . . .
 O1 O -0.0099(5) 0.1422(4) 0.0201(4) 0.0320(9) Uani 1 1 d . . .
 O2 O -0.1793(4) 0.1239(4) -0.1208(4) 0.0323(10) Uani 1 1 d . . .
 O3 O 0.3431(5) 0.1614(5) 0.2876(4) 0.0424(11) Uani 1 1 d . . .
 O4 O 0.2253(6) 0.3023(5) 0.2464(4) 0.0510(14) Uani 1 1 d . . .
 N1 N 0.274(2) 0.549(2) 0.3837(14) 0.218(9) Uani 1 1 d . . .
 H1A H 0.1946 0.4928 0.3891 0.262 Uiso 1 1 d R . .
 H1B H 0.2810 0.6321 0.4213 0.262 Uiso 1 1 d R . .
 N7 N -0.1419(7) -0.0809(6) 0.3642(5) 0.0493(17) Uani 1 1 d . . .
 N8 N -0.0024(6) 0.0328(5) 0.2531(4) 0.0333(12) Uani 1 1 d . . .
 N9 N 0.2929(5) 0.1488(6) 0.0005(5) 0.0392(13) Uani 1 1 d . . .
 N10 N 0.4044(6) 0.2475(7) -0.1333(6) 0.0497(17) Uani 1 1 d . . .
 N16 N -0.1991(13) 0.3528(11) -0.1886(11) 0.127(5) Uani 1 1 d . . .
 H16A H -0.2225 0.2631 -0.2088 0.153 Uiso 1 1 d R . .
 H16B H -0.2372 0.3983 -0.2304 0.153 Uiso 1 1 d R . .
 H24 H 0.5577 0.2923 0.4443 0.153 Uiso 1 1 d R . .
 C1 C -0.0361(8) -0.0786(7) 0.2999(6) 0.0449(17) Uani 1 1 d . . .
 H1 H 0.0082 -0.1477 0.2896 0.054 Uiso 1 1 calc R . .
 C2 C -0.1803(14) 0.0344(11) 0.3555(13) 0.109(5) Uani 1 1 d . . .
 H2 H -0.2508 0.0622 0.3904 0.131 Uiso 1 1 calc R . .
 C3 C -0.2118(12) -0.1934(9) 0.4256(8) 0.071(3) Uani 1 1 d . . .
 H3A H -0.3031 -0.1858 0.4399 0.086 Uiso 1 1 calc R . .
 H3B H -0.1567 -0.1819 0.5029 0.086 Uiso 1 1 calc R . .
 C4 C -0.0946(13) 0.1009(10) 0.2854(11) 0.087(4) Uani 1 1 d . . .
 H4 H -0.0990 0.1827 0.2626 0.104 Uiso 1 1 calc R . .
 C5 C -0.2280(9) -0.3367(8) 0.3492(7) 0.051(2) Uani 1 1 d . . .
 C6 C -0.3350(9) -0.4009(8) 0.2565(7) 0.050(2) Uani 1 1 d . . .
 C7 C 0.4017(14) 0.1023(17) -0.0205(15) 0.139(8) Uani 1 1 d . . .
 H7 H 0.4227 0.0327 0.0131 0.167 Uiso 1 1 calc R . .
 C9 C 0.4748(14) 0.1652(16) -0.0930(15) 0.130(7) Uani 1 1 d . . .
 H9 H 0.5595 0.1557 -0.1136 0.156 Uiso 1 1 calc R . .
 C10 C -0.3444(10) -0.5304(10) 0.1946(8) 0.064(2) Uani 1 1 d . . .
 H10 H -0.4185 -0.5764 0.1328 0.077 Uiso 1 1 calc R . .
 C12 C -0.4455(10) -0.3371(11) 0.2222(9) 0.069(3) Uani 1 1 d . . .
 H12A H -0.5316 -0.4109 0.1877 0.083 Uiso 1 1 calc R . .
 H12B H -0.4630 -0.2808 0.2939 0.083 Uiso 1 1 calc R . .
 C13 C -0.1323(10) -0.4041(10) 0.3757(8) 0.061(2) Uani 1 1 d . . .
 H13 H -0.0606 -0.3608 0.4400 0.074 Uiso 1 1 calc R . .
 C14 C -0.2453(13) -0.5959(11) 0.2217(10) 0.077(3) Uani 1 1 d . . .
 H14 H -0.2521 -0.6845 0.1781 0.092 Uiso 1 1 calc R . .
 C15 C -0.1389(12) -0.5288(11) 0.3125(10) 0.074(3) Uani 1 1 d . . .
 H15 H -0.0705 -0.5702 0.3305 0.089 Uiso 1 1 calc R . .
 C18 C 0.3005(7) 0.2392(8) -0.0680(6) 0.0415(16) Uani 1 1 d . . .
 H18 H 0.2394 0.2925 -0.0708 0.050 Uiso 1 1 calc R . .
 C19 C 0.3243(7) 0.2775(6) 0.3072(5) 0.0343(15) Uani 1 1 d . . .
 C22 C 0.3808(6) 0.5174(6) 0.4398(5) 0.0283(13) Uani 1 1 d . . .
 C23 C 0.4139(6) 0.3932(6) 0.4066(4) 0.0258(13) Uani 1 1 d . . .
 C24 C 0.5337(6) 0.3753(6) 0.4667(5) 0.0292(13) Uani 1 1 d . . .
 C25 C 0.0660(6) 0.4358(6) 0.0708(5) 0.0284(13) Uani 1 1 d . . .
 H25 H 0.1109 0.3915 0.1184 0.034 Uiso 1 1 calc R . .
 C28 C -0.1074(6) 0.4199(6) -0.0948(5) 0.0272(12) Uani 1 1 d . . .
 C29 C -0.0400(5) 0.3540(5) -0.0216(5) 0.0199(11) Uani 1 1 d . . .
 C30 C -0.0793(6) 0.1985(5) -0.0420(5) 0.0218(11) Uani 1 1 d . . .
 O8 O 0.3822(19) -0.0645(15) 0.3814(10) 0.199(8) Uani 1 1 d . . .
 H8A H 0.3353 -0.0341 0.4323 0.239 Uiso 1 1 d R . .
 H8B H 0.4599 -0.0024 0.3851 0.239 Uiso 1 1 d R . .

loop_
  _atom_site_aniso_label
  _atom_site_aniso_U_11
  _atom_site_aniso_U_22
  _atom_site_aniso_U_33
  _atom_site_aniso_U_23
  _atom_site_aniso_U_13
  _atom_site_aniso_U_12
 Zn1 0.0469(6) 0.0239(5) 0.0362(5) 0.0084(3) -0.0036(3) 0.0004(3)
 O1 0.044(2) 0.016(2) 0.041(2) 0.0115(17) 0.0015(18) 0.0144(18)
 O2 0.041(2) 0.0094(19) 0.040(2) 0.0012(16) -0.0041(18) 0.0024(17)
 O3 0.056(3) 0.022(2) 0.034(2) -0.0016(18) -0.009(2) -0.003(2)
 O4 0.063(3) 0.025(2) 0.044(3) 0.0036(19) -0.037(2) -0.004(2)
 N1 0.204(18) 0.27(2) 0.148(14) -0.015(15) -0.065(13) 0.094(17)
 N7 0.073(4) 0.034(3) 0.049(4) 0.020(3) 0.040(3) 0.013(3)
 N8 0.047(3) 0.022(3) 0.028(3) 0.006(2) 0.010(2) 0.003(2)
 N9 0.030(3) 0.049(3) 0.048(3) 0.033(3) 0.009(2) 0.012(2)
 N10 0.048(3) 0.058(4) 0.069(4) 0.047(3) 0.038(3) 0.026(3)
 N16 0.137(9) 0.060(6) 0.158(10) 0.030(6) -0.066(8) 0.009(6)
 C1 0.072(5) 0.029(4) 0.040(4) 0.015(3) 0.024(3) 0.016(3)
 C2 0.142(11) 0.059(6) 0.179(13) 0.060(8) 0.127(11) 0.058(7)
 C3 0.111(8) 0.047(5) 0.061(5) 0.021(4) 0.050(5) 0.015(5)
 C4 0.134(9) 0.044(5) 0.117(9) 0.042(5) 0.085(8) 0.048(6)
 C5 0.073(5) 0.042(4) 0.050(4) 0.031(4) 0.036(4) 0.017(4)
 C6 0.067(5) 0.042(4) 0.057(5) 0.036(4) 0.038(4) 0.017(4)
 C7 0.132(11) 0.199(16) 0.210(16) 0.178(15) 0.124(12) 0.133(12)
 C9 0.111(9) 0.171(14) 0.215(16) 0.156(13) 0.125(11) 0.110(10)
 C10 0.075(6) 0.057(6) 0.060(5) 0.032(4) 0.025(4) 0.005(5)
 C12 0.071(6) 0.086(7) 0.083(6) 0.064(6) 0.048(5) 0.035(5)
 C13 0.073(5) 0.062(6) 0.059(5) 0.035(4) 0.021(4) 0.019(5)
 C14 0.116(9) 0.051(5) 0.084(7) 0.032(5) 0.055(7) 0.035(6)
 C15 0.087(7) 0.065(7) 0.093(7) 0.045(6) 0.030(6) 0.036(6)
 C18 0.039(3) 0.047(4) 0.052(4) 0.029(3) 0.022(3) 0.017(3)
 C19 0.040(3) 0.022(3) 0.024(3) 0.006(2) -0.006(3) -0.015(3)
 C22 0.026(3) 0.030(3) 0.022(3) 0.011(2) -0.007(2) -0.003(2)
 C23 0.032(3) 0.017(3) 0.016(2) 0.003(2) -0.005(2) -0.010(2)
 C24 0.036(3) 0.020(3) 0.025(3) 0.006(2) -0.002(2) -0.001(2)
 C25 0.037(3) 0.016(3) 0.032(3) 0.007(2) -0.011(2) 0.012(2)
 C28 0.035(3) 0.016(3) 0.027(3) 0.002(2) -0.010(2) 0.008(2)
 C29 0.031(3) 0.007(2) 0.023(3) 0.0044(19) 0.002(2) 0.008(2)
 C30 0.031(3) 0.012(3) 0.026(3) 0.007(2) 0.010(2) 0.009(2)
 O8 0.37(2) 0.213(15) 0.133(10) 0.107(10) 0.101(12) 0.203(17)

_geom_special_details
;
 All esds (except the esd in the dihedral angle between two l.s. planes) 
 are estimated using the full covariance matrix.  The cell esds are taken 
 into account individually in the estimation of esds in distances, angles 
 and torsion angles; correlations between esds in cell parameters are only 
 used when they are defined by crystal symmetry.  An approximate (isotropic) 
 treatment of cell esds is used for estimating esds involving l.s. planes. 
;
loop_
  _geom_bond_atom_site_label_1
  _geom_bond_atom_site_label_2
  _geom_bond_distance
  _geom_bond_site_symmetry_2
  _geom_bond_publ_flag
 Zn1 O1 2.566(4) 2 ?
 Zn1 O1 2.195(4) . ?
 Zn1 O2 2.241(4) 2 ?
 Zn1 O3 2.399(4) . ?
 Zn1 O4 2.247(5) . ?
 Zn1 N8 2.216(5) . ?
 Zn1 N9 2.186(5) . ?
 O1 Zn1 2.566(4) 2 ?
 O1 C30 1.267(7) . ?
 O2 Zn1 2.241(4) 2 ?
 O2 C30 1.251(7) . ?
 O3 C19 1.235(8) . ?
 O4 C19 1.274(8) . ?
 N1 H1A 0.8600 . ?
 N1 H1B 0.8602 . ?
 N1 C22 1.346(18) . ?
 N7 C1 1.345(9) . ?
 N7 C2 1.354(11) . ?
 N7 C3 1.495(9) . ?
 N8 C1 1.315(8) . ?
 N8 C4 1.345(11) . ?
 N9 C7 1.334(11) . ?
 N9 C18 1.305(8) . ?
 N10 C9 1.355(11) . ?
 N10 C12 1.496(8) 2 ?
 N10 C18 1.330(8) . ?
 N16 H16A 0.8600 . ?
 N16 H16B 0.8600 . ?
 N16 C28 1.293(12) . ?
 C1 H1 0.9300 . ?
 C2 H2 0.9300 . ?
 C2 C4 1.357(13) . ?
 C3 H3A 0.9700 . ?
 C3 H3B 0.9700 . ?
 C3 C5 1.517(12) . ?
 C4 H4 0.9300 . ?
 C5 C6 1.364(12) . ?
 C5 C13 1.375(12) . ?
 C6 C10 1.353(12) . ?
 C6 C12 1.496(12) . ?
 C7 H7 0.9300 . ?
 C7 C9 1.295(14) . ?
 C9 H9 0.9300 . ?
 C10 H10 0.9300 . ?
 C10 C14 1.391(14) . ?
 C12 N10 1.496(8) 2 ?
 C12 H12A 0.9700 . ?
 C12 H12B 0.9700 . ?
 C13 H13 0.9300 . ?
 C13 C15 1.324(14) . ?
 C14 H14 0.9300 . ?
 C14 C15 1.351(16) . ?
 C15 H15 0.9300 . ?
 C18 H18 0.9300 . ?
 C19 C23 1.494(8) . ?
 C22 C23 1.395(9) . ?
 C22 C24 1.402(8) 2_666 ?
 C23 C24 1.408(9) . ?
 C24 H24 0.9419 . ?
 C24 C22 1.402(8) 2_666 ?
 C25 H25 0.9300 . ?
 C25 C28 1.382(8) 2_565 ?
 C25 C29 1.389(8) . ?
 C28 C25 1.382(8) 2_565 ?
 C28 C29 1.404(7) . ?
 C29 C30 1.493(7) . ?
 O8 H8A 0.8501 . ?
 O8 H8B 0.8500 . ?

loop_
  _geom_angle_atom_site_label_1
  _geom_angle_atom_site_label_2
  _geom_angle_atom_site_label_3
  _geom_angle
  _geom_angle_site_symmetry_1
  _geom_angle_site_symmetry_3
  _geom_angle_publ_flag
 O1 Zn1 O1 75.20(15) . 2 ?
 O1 Zn1 O2 128.58(16) . 2 ?
 O1 Zn1 O3 147.84(16) . . ?
 O1 Zn1 O4 91.78(16) . . ?
 O1 Zn1 N8 88.22(18) . . ?
 O2 Zn1 O1 53.48(13) 2 2 ?
 O2 Zn1 O3 83.51(15) 2 . ?
 O2 Zn1 O4 138.91(16) 2 . ?
 O3 Zn1 O1 136.95(14) . 2 ?
 O4 Zn1 O1 166.12(16) . 2 ?
 O4 Zn1 O3 56.14(16) . . ?
 N8 Zn1 O1 87.95(16) . 2 ?
 N8 Zn1 O2 87.09(18) . 2 ?
 N8 Zn1 O3 91.83(18) . . ?
 N8 Zn1 O4 86.8(2) . . ?
 N9 Zn1 O1 92.72(19) . 2 ?
 N9 Zn1 O1 88.67(17) . . ?
 N9 Zn1 O2 96.02(19) . 2 ?
 N9 Zn1 O3 89.99(19) . . ?
 N9 Zn1 O4 91.7(2) . . ?
 N9 Zn1 N8 176.55(18) . . ?
 Zn1 O1 Zn1 104.80(15) . 2 ?
 C30 O1 Zn1 167.0(4) . . ?
 C30 O1 Zn1 85.0(3) . 2 ?
 C30 O2 Zn1 100.6(3) . 2 ?
 C19 O3 Zn1 88.1(4) . . ?
 C19 O4 Zn1 94.1(4) . . ?
 H1A N1 H1B 109.5 . . ?
 C22 N1 H1A 111.7 . . ?
 C22 N1 H1B 104.6 . . ?
 C1 N7 C2 106.6(6) . . ?
 C1 N7 C3 127.1(6) . . ?
 C2 N7 C3 126.1(7) . . ?
 C1 N8 Zn1 129.1(5) . . ?
 C1 N8 C4 104.5(6) . . ?
 C4 N8 Zn1 125.8(5) . . ?
 C7 N9 Zn1 125.7(5) . . ?
 C18 N9 Zn1 131.3(5) . . ?
 C18 N9 C7 102.9(6) . . ?
 C9 N10 C12 126.6(6) . 2 ?
 C18 N10 C9 104.2(6) . . ?
 C18 N10 C12 128.9(6) . 2 ?
 H16A N16 H16B 120.0 . . ?
 C28 N16 H16A 120.3 . . ?
 C28 N16 H16B 119.7 . . ?
 N7 C1 H1 123.9 . . ?
 N8 C1 N7 112.1(6) . . ?
 N8 C1 H1 123.9 . . ?
 N7 C2 H2 127.2 . . ?
 N7 C2 C4 105.7(8) . . ?
 C4 C2 H2 127.2 . . ?
 N7 C3 H3A 109.5 . . ?
 N7 C3 H3B 109.5 . . ?
 N7 C3 C5 110.7(6) . . ?
 H3A C3 H3B 108.1 . . ?
 C5 C3 H3A 109.5 . . ?
 C5 C3 H3B 109.5 . . ?
 N8 C4 C2 111.0(8) . . ?
 N8 C4 H4 124.5 . . ?
 C2 C4 H4 124.5 . . ?
 C6 C5 C3 122.2(8) . . ?
 C6 C5 C13 119.3(8) . . ?
 C13 C5 C3 118.5(9) . . ?
 C5 C6 C12 123.2(8) . . ?
 C10 C6 C5 118.6(8) . . ?
 C10 C6 C12 118.2(9) . . ?
 N9 C7 H7 123.9 . . ?
 C9 C7 N9 112.3(8) . . ?
 C9 C7 H7 123.9 . . ?
 N10 C9 H9 126.6 . . ?
 C7 C9 N10 106.9(8) . . ?
 C7 C9 H9 126.6 . . ?
 C6 C10 H10 119.4 . . ?
 C6 C10 C14 121.2(10) . . ?
 C14 C10 H10 119.4 . . ?
 N10 C12 C6 112.1(6) 2 . ?
 N10 C12 H12A 109.2 2 . ?
 N10 C12 H12B 109.2 2 . ?
 C6 C12 H12A 109.2 . . ?
 C6 C12 H12B 109.2 . . ?
 H12A C12 H12B 107.9 . . ?
 C5 C13 H13 119.0 . . ?
 C15 C13 C5 122.0(10) . . ?
 C15 C13 H13 119.0 . . ?
 C10 C14 H14 120.5 . . ?
 C15 C14 C10 119.0(9) . . ?
 C15 C14 H14 120.5 . . ?
 C13 C15 C14 119.9(10) . . ?
 C13 C15 H15 120.0 . . ?
 C14 C15 H15 120.0 . . ?
 N9 C18 N10 113.2(6) . . ?
 N9 C18 H18 123.4 . . ?
 N10 C18 H18 123.4 . . ?
 O3 C19 O4 121.6(5) . . ?
 O3 C19 C23 121.1(6) . . ?
 O4 C19 C23 117.3(6) . . ?
 N1 C22 C23 125.0(10) . . ?
 N1 C22 C24 114.8(10) . 2_666 ?
 C23 C22 C24 120.1(5) . 2_666 ?
 C22 C23 C19 121.0(5) . . ?
 C22 C23 C24 120.1(5) . . ?
 C24 C23 C19 118.9(6) . . ?
 C22 C24 H24 119.4 2_666 . ?
 C22 C24 C23 119.7(6) 2_666 . ?
 C23 C24 H24 120.9 . . ?
 C28 C25 H25 118.7 2_565 . ?
 C28 C25 C29 122.7(5) 2_565 . ?
 C29 C25 H25 118.7 . . ?
 N16 C28 C25 118.1(6) . 2_565 ?
 N16 C28 C29 123.5(7) . . ?
 C25 C28 C29 118.2(5) 2_565 . ?
 C25 C29 C28 119.1(5) . . ?
 C25 C29 C30 119.7(5) . . ?
 C28 C29 C30 121.2(5) . . ?
 O1 C30 C29 119.7(5) . . ?
 O2 C30 O1 120.1(5) . . ?
 O2 C30 C29 120.2(5) . . ?
 H8A O8 H8B 109.5 . . ?
