# Supplementary material
Source: MDPI journal article supplement (https://www.mdpi.com/2073-4352/8/6/236)
Supplement: s1 [file s1 › 2.cif]

data_wang1
_audit_creation_date              2018-05-02
_audit_creation_method
;
Olex2 1.2
(compiled 2013.09.17 svn.r2790 for OlexSys, GUI svn.r4601)
;
_shelxl_version_number            2013-2
_publ_contact_author_address      ?
_publ_contact_author_email        ?
_publ_contact_author_name         ''
_publ_contact_author_phone        ?
_chemical_name_common             ?
_chemical_name_systematic
;
 ?
;
_chemical_formula_moiety          'C44 H34 Cd2 N8 O10, 2(H2 O)'
_chemical_formula_sum             'C44 H40 Cd2 N8 O12'
_chemical_formula_weight          1097.66
_chemical_melting_point           'not measured'
loop_
  _atom_type_symbol
  _atom_type_description
  _atom_type_scat_dispersion_real
  _atom_type_scat_dispersion_imag
  _atom_type_scat_source
 'C' 'C' 0.0030 0.0020 'International Tables Vol C Tables 4.2.6.8 and 6.1.1.4'
 'H' 'H' 0.0000 0.0000 'International Tables Vol C Tables 4.2.6.8 and 6.1.1.4'
 'Cd' 'Cd' -0.8080 1.2020
 'International Tables Vol C Tables 4.2.6.8 and 6.1.1.4'
 'N' 'N' 0.0060 0.0030 'International Tables Vol C Tables 4.2.6.8 and 6.1.1.4'
 'O' 'O' 0.0110 0.0060 'International Tables Vol C Tables 4.2.6.8 and 6.1.1.4'

_shelx_space_group_comment
;
The symmetry employed for this shelxl refinement is uniquely defined
by the following loop, which should always be used as a source of
symmetry information in preference to the above space-group names.
They are only intended as comments.
;
_space_group_crystal_system       'monoclinic'
_space_group_IT_number            14
_space_group_name_H-M_alt         'P 1 21/c 1'
_space_group_name_Hall            '-P 2ybc'
loop_
  _space_group_symop_operation_xyz
 'x, y, z'
 '-x, y+1/2, -z+1/2'
 '-x, -y, -z'
 'x, -y-1/2, z-1/2'

_cell_length_a                    14.631(4)
_cell_length_b                    18.462(5)
_cell_length_c                    15.946(4)
_cell_angle_alpha                 90
_cell_angle_beta                  98.955(4)
_cell_angle_gamma                 90
_cell_volume                      4255(2)
_cell_formula_units_Z             4
_cell_measurement_reflns_used     7423
_cell_measurement_temperature     293(2)
_cell_measurement_theta_max       24.998
_cell_measurement_theta_min       1.409
_shelx_estimated_absorpt_T_max    ?
_shelx_estimated_absorpt_T_min    ?
_exptl_absorpt_coefficient_mu     1.075
_exptl_absorpt_correction_T_max   ?
_exptl_absorpt_correction_T_min   ?
_exptl_absorpt_correction_type    ?
_exptl_absorpt_process_details    ?
_exptl_crystal_colour             'colourless'
_exptl_crystal_density_diffrn     1.714
_exptl_crystal_density_meas       ?
_exptl_crystal_density_method     ?
_exptl_crystal_description        block
_exptl_crystal_F_000              2208
_exptl_crystal_size_max           0.32
_exptl_crystal_size_mid           0.28
_exptl_crystal_size_min           0.25
_exptl_special_details
;
 ?
;
_exptl_transmission_factor_max    ?
_exptl_transmission_factor_min    ?
_diffrn_reflns_av_R_equivalents   0.0632
_diffrn_reflns_av_unetI/netI      0.0619
_diffrn_reflns_Laue_measured_fraction_full 0.963
_diffrn_reflns_Laue_measured_fraction_max 0.993
_diffrn_reflns_limit_h_max        17
_diffrn_reflns_limit_h_min        -11
_diffrn_reflns_limit_k_max        21
_diffrn_reflns_limit_k_min        -19
_diffrn_reflns_limit_l_max        14
_diffrn_reflns_limit_l_min        -18
_diffrn_reflns_number             21299
_diffrn_reflns_point_group_measured_fraction_full 0.963
_diffrn_reflns_point_group_measured_fraction_max 0.993
_diffrn_reflns_theta_full         25.242
_diffrn_reflns_theta_max          24.998
_diffrn_reflns_theta_min          1.409
_diffrn_ambient_temperature       293(2)
_diffrn_detector_area_resol_mean  '9.00cm'
_diffrn_measured_fraction_theta_full 0.963
_diffrn_measured_fraction_theta_max 0.993
_diffrn_measurement_device_type   'CCD area detector'
_diffrn_measurement_method        'phi and omega scans'
_diffrn_radiation_type            MoK\a
_diffrn_radiation_wavelength      0.71073
_diffrn_source                    'fine-focus sealed tube'
_reflns_Friedel_coverage          0.000
_reflns_Friedel_fraction_full     .
_reflns_Friedel_fraction_max      .
_reflns_number_gt                 5229
_reflns_number_total              7423
_reflns_special_details
;
 Reflections were merged by SHELXL according to the crystal
 class for the calculation of statistics and refinement.
 
 _reflns_Friedel_fraction is defined as the number of unique
 Friedel pairs measured divided by the number that would be
 possible theoretically, ignoring centric projections and
 systematic absences.
;
_reflns_threshold_expression      'I > 2\s(I)'
_computing_cell_refinement        ?
_computing_data_collection        ?
_computing_data_reduction         ?
_computing_molecular_graphics
;
O. V. Dolomanov, L. J. Bourhis, R. J. Gildea, J. A. K. Howard and H. Puschmann,
OLEX2: a complete structure solution, refinement and analysis program.
J. Appl. Cryst. (2009). 42, 339-341.
;
_computing_publication_material
;
O. V. Dolomanov, L. J. Bourhis, R. J. Gildea, J. A. K. Howard and H. Puschmann,
OLEX2: a complete structure solution, refinement and analysis program.
J. Appl. Cryst. (2009). 42, 339-341.
;
_computing_structure_refinement
;
SHELX, G.M. Sheldrick, Acta Cryst.
(2008). A64, 112-122
;
_computing_structure_solution
'SUPERFLIP, J. Appl. Cryst. (2007) 40, 786-790'
_refine_diff_density_max          2.175
_refine_diff_density_min          -1.866
_refine_diff_density_rms          0.145
_refine_ls_extinction_coef        .
_refine_ls_extinction_method      none
_refine_ls_goodness_of_fit_ref    1.060
_refine_ls_hydrogen_treatment     constr
_refine_ls_matrix_type            full
_refine_ls_number_parameters      605
_refine_ls_number_reflns          7423
_refine_ls_number_restraints      12
_refine_ls_R_factor_all           0.0861
_refine_ls_R_factor_gt            0.0634
_refine_ls_restrained_S_all       1.063
_refine_ls_shift/su_max           0.000
_refine_ls_shift/su_mean          0.000
_refine_ls_structure_factor_coef  Fsqd
_refine_ls_weighting_details
;
 w=1/[\s^2^(Fo^2^)+(0.1012P)^2^+10.8980P]
 where P=(Fo^2^+2Fc^2^)/3
;
_refine_ls_weighting_scheme       calc
_refine_ls_wR_factor_gt           0.1799
_refine_ls_wR_factor_ref          0.1916
_refine_special_details
;
 ?
;
_olex2_refinement_description
;
1. Others
 Fixed Uiso: H12(0.056) H3(0.059) H14(0.07) H2(0.05) H44(0.069) H13(0.073)
 H3A(0.066) H22(0.038) H8(0.112) H1(0.074) H24(0.036) H6(0.105) H30(0.039)
 H36(0.092) H41A(0.105) H41B(0.105) H7(0.115) H11A(0.082) H11B(0.082)
 H43(0.086) H4A(0.109) H4B(0.109) H9(0.095) H39(0.099) H12A(0.035) H28(0.039)
 H15(0.04) H20(0.038) H34A(0.092) H34B(0.092) H37(0.112) H38(0.109) H42(0.113)
 H1A(0.078) H1B(0.078) H2A(0.077) H2B(0.077) H33(0.02)
 Fixed X: H12(-0.1104) H3(0.3423) H14(-0.1336) H2(-0.3918) H44(-0.4564) H13(-
 0.1301) H3A(-0.334) H22(-0.2877) H8(-0.0137) H1(-0.401) H24(-0.4811) H6(-
 0.2876) H30(0.0305) H36(-0.2133) H41A(-0.487) H41B(-0.3913) H7(-0.1555) H11A(-
 0.1835) H11B(-0.0758) H43(-0.3046) H4A(-0.3678) H4B(-0.3114) H9(-0.0095) H39(-
 0.5186) H12A(-0.1399) H28(0.1861) H15(-0.3072) H20(-0.2116) H34A(-0.2462)
 H34B(-0.1757) H37(-0.3242) H38(-0.4748) H42(-0.3357) H1A(0.1439) H1B(0.102)
 H2A(-0.643) H2B(-0.7285) H33(-0.129)
 Fixed Y: H12(0.229) H3(0.377) H14(0.5885) H2(0.5139) H44(0.42) H13(0.3809)
 H3A(0.6586) H22(0.1179) H8(0.7931) H1(0.4577) H24(0.272) H6(0.7908)
 H30(0.2188) H36(0.2246) H41A(0.4029) H41B(0.4153) H7(0.8499) H11A(0.5739)
 H11B(0.5814) H43(0.5892) H4A(0.6948) H4B(0.6361) H9(0.676) H39(0.2906)
 H12A(0.4393) H28(0.394) H15(0.7032) H20(0.3187) H34A(0.3924) H34B(0.3282)
 H37(0.1443) H38(0.176) H42(0.5404) H1A(0.533) H1B(0.5673) H2A(0.4933)
 H2B(0.4998) H33(0.4921)
 Fixed Z: H12(-0.2213) H3(-0.1867) H14(-0.3999) H2(-0.604) H44(-0.1273) H13(-
 0.4334) H3A(-0.4192) H22(-0.2106) H8(-0.4588) H1(-0.4696) H24(-0.2713) H6(-
 0.5278) H30(-0.2705) H36(0.0204) H41A(0.0457) H41B(0.1035) H7(-0.4723) H11A(-
 0.6199) H11B(-0.5967) H43(-0.0773) H4A(-0.6005) H4B(-0.6419) H9(-0.5099) H39(-
 0.0169) H12A(-0.5712) H28(-0.2014) H15(-0.2686) H20(-0.2596) H34A(0.1095)
 H34B(0.1119) H37(-0.0313) H38(-0.0548) H42(0.0561) H1A(-0.2) H1B(-0.2734) H2A(-
 0.2601) H2B(-0.2333) H33(0.0834)
;
_atom_sites_solution_hydrogens    mixed
_atom_sites_solution_primary      iterative
_atom_sites_solution_secondary    ?
loop_
  _atom_site_label
  _atom_site_type_symbol
  _atom_site_fract_x
  _atom_site_fract_y
  _atom_site_fract_z
  _atom_site_U_iso_or_equiv
  _atom_site_adp_type
  _atom_site_occupancy
  _atom_site_site_symmetry_order
  _atom_site_calc_flag
  _atom_site_refinement_flags_posn
  _atom_site_refinement_flags_adp
  _atom_site_refinement_flags_occupancy
  _atom_site_disorder_assembly
  _atom_site_disorder_group
 Cd1 Cd -0.13821(4) 0.46812(3) -0.24236(4) 0.02920(19) Uani 1 1 d . . . . .
 Cd2 Cd -0.39118(4) 0.53447(3) -0.27599(4) 0.0309(2) Uani 1 1 d . . . . .
 O8 O -0.2984(4) 0.4289(2) -0.2792(4) 0.0386(13) Uani 1 1 d . . . . .
 O10 O -0.5518(4) 0.1507(3) -0.2469(4) 0.0491(16) Uani 1 1 d . . . . .
 O7 O -0.2322(4) 0.5806(3) -0.2390(4) 0.0441(14) Uani 1 1 d . . . . .
 O5 O 0.0181(4) 0.4271(3) -0.2280(4) 0.0421(14) Uani 1 1 d . . . . .
 O4 O -0.0675(4) 0.3289(3) -0.2573(5) 0.063(2) Uani 1 1 d . . . . .
 O12 O -0.1440(4) 0.1938(3) -0.2183(4) 0.0464(15) Uani 1 1 d . . . . .
 H12 H -0.1104 0.2290 -0.2213 0.056 Uiso 1 1 d R U . . .
 O6 O -0.0812(4) 0.5894(3) -0.2191(4) 0.0418(14) Uani 1 1 d . . . . .
 O11 O -0.4464(4) 0.0676(3) -0.2153(4) 0.0402(13) Uani 1 1 d . . . . .
 O9 O -0.4488(4) 0.4097(3) -0.2973(4) 0.0459(15) Uani 1 1 d . . . . .
 O3 O 0.3469(4) 0.3330(3) -0.1916(4) 0.0494(15) Uani 1 1 d . . . . .
 H3 H 0.3423 0.3770 -0.1867 0.059 Uiso 1 1 d R U . . .
 N3 N -0.3453(6) 0.6043(5) -0.5299(5) 0.059(2) Uani 1 1 d . . . . .
 N2 N -0.1334(6) 0.5319(4) -0.5065(4) 0.050(2) Uani 1 1 d . . . . .
 N7 N -0.1755(6) 0.3935(5) 0.0110(5) 0.072(3) Uani 1 1 d . . . . .
 N5 N -0.3853(5) 0.5118(4) -0.1328(5) 0.0471(19) Uani 1 1 d . . . . .
 N1 N -0.1354(5) 0.4820(3) -0.3792(4) 0.0375(16) Uani 1 1 d . . . . .
 N4 N -0.3747(5) 0.5541(4) -0.4091(4) 0.0422(17) Uani 1 1 d . . . . .
 N8 N -0.1445(5) 0.4370(5) -0.1083(5) 0.061(2) Uani 1 1 d . . . . .
 N6 N -0.3967(7) 0.4585(4) -0.0136(5) 0.064(2) Uani 1 1 d . . . . .
 C14 C -0.1341(8) 0.5427(5) -0.4240(6) 0.058(3) Uani 1 1 d . . . . .
 H14 H -0.1336 0.5885 -0.3999 0.070 Uiso 1 1 calc R U . . .
 C2 C -0.3787(6) 0.5351(4) -0.5506(5) 0.042(2) Uani 1 1 d . . . . .
 H2 H -0.3918 0.5139 -0.6040 0.050 Uiso 1 1 calc R U . . .
 C27 C 0.0956(5) 0.3139(4) -0.2381(5) 0.0302(17) Uani 1 1 d . . . . .
 C25 C -0.4693(5) 0.1320(4) -0.2349(5) 0.0289(16) Uani 1 1 d . . . . .
 C31 C -0.1992(6) 0.3949(5) -0.0733(5) 0.046(2) Uani 1 1 d . . . . .
 C29 C 0.2611(5) 0.3037(4) -0.2128(5) 0.0298(16) Uani 1 1 d . . . . .
 C26 C 0.0093(5) 0.3592(4) -0.2406(6) 0.039(2) Uani 1 1 d . . . . .
 C44 C -0.4203(7) 0.4560(5) -0.0977(7) 0.057(3) Uani 1 1 d . . . . .
 H44 H -0.4564 0.4200 -0.1273 0.069 Uiso 1 1 calc R U . . .
 C13 C -0.1332(8) 0.4307(5) -0.4425(6) 0.061(3) Uani 1 1 d . . . . .
 H13 H -0.1301 0.3809 -0.4334 0.073 Uiso 1 1 calc R U . . .
 C3 C -0.3483(7) 0.6149(5) -0.4472(6) 0.055(2) Uani 1 1 d . . . . .
 H3A H -0.3340 0.6586 -0.4192 0.066 Uiso 1 1 calc R U . . .
 C19 C -0.3493(5) 0.3079(4) -0.2694(5) 0.0276(16) Uani 1 1 d . . . . .
 C23 C -0.3944(5) 0.1863(4) -0.2427(5) 0.0284(16) Uani 1 1 d . . . . .
 C22 C -0.3031(5) 0.1653(4) -0.2266(5) 0.0314(17) Uani 1 1 d . . . . .
 H22 H -0.2877 0.1179 -0.2106 0.038 Uiso 1 1 calc R U . . .
 C8 C -0.0676(11) 0.7694(7) -0.4827(8) 0.093(4) Uani 1 1 d . . . . .
 H8 H -0.0137 0.7931 -0.4588 0.112 Uiso 1 1 calc R U . . .
 C18 C -0.3679(5) 0.3872(4) -0.2838(5) 0.0310(17) Uani 1 1 d . . . . .
 C1 C -0.3873(7) 0.5064(6) -0.4761(6) 0.061(3) Uani 1 1 d . . . . .
 H1 H -0.4010 0.4577 -0.4696 0.074 Uiso 1 1 calc R U . . .
 C24 C -0.4194(5) 0.2580(4) -0.2627(5) 0.0302(17) Uani 1 1 d . . . . .
 H24 H -0.4811 0.2720 -0.2713 0.036 Uiso 1 1 calc R U . . .
 C17 C -0.1588(5) 0.6181(4) -0.2333(5) 0.0315(17) Uani 1 1 d . . . . .
 C6 C -0.2312(11) 0.7668(7) -0.5241(8) 0.088(4) Uani 1 1 d . . . . .
 H6 H -0.2876 0.7908 -0.5278 0.105 Uiso 1 1 calc R U . . .
 C30 C 0.0883(5) 0.2402(4) -0.2560(5) 0.0324(17) Uani 1 1 d . . . . .
 H30 H 0.0305 0.2188 -0.2705 0.039 Uiso 1 1 calc R U . . .
 C16 C -0.1680(5) 0.6991(4) -0.2478(4) 0.0271(16) Uani 1 1 d . . . . .
 C5 C -0.2298(9) 0.6968(6) -0.5525(6) 0.069(3) Uani 1 1 d . . . . .
 C35 C -0.2979(7) 0.3074(5) 0.0361(6) 0.053(2) Uani 1 1 d . . . . .
 C36 C -0.2751(9) 0.2384(6) 0.0136(7) 0.076(3) Uani 1 1 d . . . . .
 H36 H -0.2133 0.2246 0.0204 0.092 Uiso 1 1 calc R U . . .
 C41 C -0.4206(9) 0.4029(6) 0.0465(7) 0.087(4) Uani 1 1 d . . . . .
 H41A H -0.4870 0.4029 0.0457 0.105 Uiso 1 1 calc R U . . .
 H41B H -0.3913 0.4153 0.1035 0.105 Uiso 1 1 calc R U . . .
 C7 C -0.1519(13) 0.8023(7) -0.4904(8) 0.096(5) Uani 1 1 d . . . . .
 H7 H -0.1555 0.8499 -0.4723 0.115 Uiso 1 1 calc R U . . .
 C11 C -0.1336(9) 0.5852(5) -0.5742(6) 0.069(3) Uani 1 1 d . . . . .
 H11A H -0.1835 0.5739 -0.6199 0.082 Uiso 1 1 calc R U . . .
 H11B H -0.0758 0.5814 -0.5967 0.082 Uiso 1 1 calc R U . . .
 C43 C -0.3406(9) 0.5487(5) -0.0712(7) 0.072(3) Uani 1 1 d . . . . .
 H43 H -0.3046 0.5892 -0.0773 0.086 Uiso 1 1 calc R U . . .
 C4 C -0.3188(9) 0.6592(7) -0.5887(7) 0.091(4) Uani 1 1 d . . . . .
 H4A H -0.3678 0.6948 -0.6005 0.109 Uiso 1 1 calc R U . . .
 H4B H -0.3114 0.6361 -0.6419 0.109 Uiso 1 1 calc R U . . .
 C10 C -0.1449(9) 0.6617(5) -0.5454(6) 0.061(3) Uani 1 1 d . . . . .
 C40 C -0.3901(7) 0.3285(5) 0.0247(6) 0.052(2) Uani 1 1 d . . . . .
 C9 C -0.0663(10) 0.6991(7) -0.5124(7) 0.079(3) Uani 1 1 d . . . . .
 H9 H -0.0095 0.6760 -0.5099 0.095 Uiso 1 1 calc R U . . .
 C39 C -0.4563(9) 0.2781(8) -0.0090(7) 0.082(4) Uani 1 1 d . . . . .
 H39 H -0.5186 0.2906 -0.0169 0.099 Uiso 1 1 calc R U . . .
 C12 C -0.1363(5) 0.4627(4) -0.5191(4) 0.0289(17) Uani 1 1 d . . . . .
 H12A H -0.1399 0.4393 -0.5712 0.035 Uiso 1 1 calc R U . . .
 C28 C 0.1815(5) 0.3451(4) -0.2152(5) 0.0323(17) Uani 1 1 d . . . . .
 H28 H 0.1861 0.3940 -0.2014 0.039 Uiso 1 1 calc R U . . .
 C15 C -0.2540(5) 0.7309(4) -0.2680(5) 0.0330(17) Uani 1 1 d . . . . .
 H15 H -0.3072 0.7032 -0.2686 0.040 Uiso 1 1 calc R U . . .
 C21 C -0.2344(5) 0.2151(4) -0.2341(5) 0.0325(17) Uani 1 1 d . . . . .
 C20 C -0.2582(5) 0.2853(4) -0.2550(5) 0.0318(17) Uani 1 1 d . . . . .
 H20 H -0.2116 0.3187 -0.2596 0.038 Uiso 1 1 calc R U . . .
 C34 C -0.2213(8) 0.3564(6) 0.0749(6) 0.077(4) Uani 1 1 d . . . . .
 H34A H -0.2462 0.3924 0.1095 0.092 Uiso 1 1 calc R U . . .
 H34B H -0.1757 0.3282 0.1119 0.092 Uiso 1 1 calc R U . . .
 C37 C -0.3411(13) 0.1910(7) -0.0181(8) 0.093(4) Uani 1 1 d . . . . .
 H37 H -0.3242 0.1443 -0.0313 0.112 Uiso 1 1 calc R U . . .
 C38 C -0.4303(11) 0.2092(8) -0.0311(8) 0.091(5) Uani 1 1 d . . . . .
 H38 H -0.4748 0.1760 -0.0548 0.109 Uiso 1 1 calc R U . . .
 C42 C -0.3537(11) 0.5201(6) 0.0027(6) 0.094(5) Uani 1 1 d . . . . .
 H42 H -0.3357 0.5404 0.0561 0.113 Uiso 1 1 calc R U . . .
 O1 O 0.1408(5) 0.5350(3) -0.2536(5) 0.065(2) Uani 1 1 d . . . . .
 H1A H 0.1439 0.5330 -0.2000 0.078 Uiso 1 1 d R U . . .
 H1B H 0.1020 0.5673 -0.2734 0.078 Uiso 1 1 d R U . . .
 O2 O -0.6763(5) 0.4785(3) -0.2244(5) 0.064(2) Uani 1 1 d . . . . .
 H2A H -0.6430 0.4933 -0.2601 0.077 Uiso 1 1 d R U . . .
 H2B H -0.7285 0.4998 -0.2333 0.077 Uiso 1 1 d R U . . .
 C32 C -0.1016(14) 0.4763(10) -0.0459(13) 0.143(7) Uani 1 1 d . U . . .
 C33 C -0.1335(8) 0.4645(6) 0.0342(7) 0.017(4) Uani 0.53(2) 1 d . U P A 1
 H33 H -0.1290 0.4921 0.0834 0.020 Uiso 1 1 calc R U . . .
 C33A C -0.0808(17) 0.4106(14) 0.0249(14) 0.068(9) Uani 0.47(2) 1 d . . P A 2

loop_
  _atom_site_aniso_label
  _atom_site_aniso_U_11
  _atom_site_aniso_U_22
  _atom_site_aniso_U_33
  _atom_site_aniso_U_23
  _atom_site_aniso_U_13
  _atom_site_aniso_U_12
 Cd1 0.0319(3) 0.0208(3) 0.0369(3) 0.0035(2) 0.0116(3) 0.0035(2)
 Cd2 0.0320(3) 0.0190(3) 0.0436(4) 0.0046(2) 0.0121(3) 0.0054(2)
 O8 0.037(3) 0.016(2) 0.063(4) 0.000(2) 0.009(3) -0.002(2)
 O10 0.033(3) 0.022(3) 0.094(5) 0.001(3) 0.017(3) -0.002(2)
 O7 0.042(3) 0.029(3) 0.062(4) 0.003(3) 0.013(3) -0.008(3)
 O5 0.038(3) 0.022(3) 0.069(4) 0.005(3) 0.017(3) 0.004(2)
 O4 0.028(3) 0.034(3) 0.130(6) 0.006(4) 0.015(4) 0.003(3)
 O12 0.028(3) 0.022(3) 0.091(5) -0.003(3) 0.017(3) -0.002(2)
 O6 0.039(3) 0.023(3) 0.066(4) 0.002(3) 0.015(3) 0.008(2)
 O11 0.031(3) 0.024(3) 0.066(4) 0.007(3) 0.011(3) -0.006(2)
 O9 0.032(3) 0.026(3) 0.077(4) 0.009(3) 0.003(3) 0.006(2)
 O3 0.032(3) 0.030(3) 0.083(4) -0.006(3) 0.001(3) 0.000(2)
 N3 0.071(6) 0.073(6) 0.034(4) 0.014(4) 0.013(4) 0.003(4)
 N2 0.074(6) 0.043(5) 0.041(4) 0.002(3) 0.027(4) 0.011(4)
 N7 0.073(6) 0.102(7) 0.039(5) 0.017(5) 0.006(4) -0.031(5)
 N5 0.055(5) 0.044(4) 0.046(4) 0.030(4) 0.016(4) 0.019(4)
 N1 0.039(4) 0.033(4) 0.042(4) -0.012(3) 0.011(3) 0.000(3)
 N4 0.045(4) 0.042(4) 0.038(4) -0.017(3) 0.002(3) 0.007(3)
 N8 0.047(5) 0.095(6) 0.039(4) 0.026(4) 0.002(4) -0.029(5)
 N6 0.099(7) 0.052(5) 0.048(5) 0.011(4) 0.031(5) 0.026(5)
 C14 0.097(8) 0.038(5) 0.045(5) 0.002(4) 0.029(6) 0.001(5)
 C2 0.055(6) 0.041(5) 0.026(4) -0.009(4) -0.005(4) -0.009(4)
 C27 0.027(4) 0.028(4) 0.038(4) 0.004(3) 0.010(3) 0.000(3)
 C25 0.030(4) 0.021(4) 0.039(4) -0.004(3) 0.013(3) -0.002(3)
 C31 0.057(6) 0.050(5) 0.033(5) 0.003(4) 0.013(4) -0.001(4)
 C29 0.024(4) 0.029(4) 0.038(4) 0.004(3) 0.007(3) 0.001(3)
 C26 0.026(4) 0.031(4) 0.062(6) 0.012(4) 0.013(4) 0.006(3)
 C44 0.071(7) 0.045(5) 0.063(7) 0.003(5) 0.031(6) 0.008(5)
 C13 0.100(8) 0.031(5) 0.052(6) -0.015(4) 0.015(6) -0.005(5)
 C3 0.075(7) 0.042(5) 0.048(5) 0.000(4) 0.009(5) 0.000(5)
 C19 0.030(4) 0.018(3) 0.035(4) -0.002(3) 0.006(3) -0.002(3)
 C23 0.029(4) 0.022(4) 0.035(4) -0.003(3) 0.007(3) 0.001(3)
 C22 0.035(4) 0.018(3) 0.041(4) -0.005(3) 0.007(4) -0.003(3)
 C8 0.125(13) 0.079(9) 0.074(9) -0.001(7) 0.010(9) -0.018(9)
 C18 0.040(5) 0.017(4) 0.036(4) -0.002(3) 0.007(4) -0.002(3)
 C1 0.078(8) 0.049(6) 0.060(7) -0.027(5) 0.020(6) -0.012(5)
 C24 0.026(4) 0.021(4) 0.044(4) -0.002(3) 0.007(3) -0.001(3)
 C17 0.036(5) 0.022(4) 0.037(4) -0.003(3) 0.005(4) -0.005(3)
 C6 0.144(13) 0.056(7) 0.074(8) 0.019(6) 0.050(9) 0.027(8)
 C30 0.024(4) 0.026(4) 0.046(5) 0.005(3) 0.002(3) 0.001(3)
 C16 0.030(4) 0.022(4) 0.030(4) -0.003(3) 0.008(3) 0.001(3)
 C5 0.113(10) 0.050(6) 0.049(6) 0.020(5) 0.025(6) 0.010(6)
 C35 0.084(8) 0.038(5) 0.042(5) 0.007(4) 0.029(5) -0.011(5)
 C36 0.104(10) 0.068(8) 0.063(7) 0.022(6) 0.029(7) 0.006(7)
 C41 0.120(11) 0.074(8) 0.086(8) 0.027(7) 0.073(8) 0.025(7)
 C7 0.189(17) 0.046(7) 0.061(8) -0.003(6) 0.047(10) 0.009(9)
 C11 0.110(9) 0.055(6) 0.048(6) 0.009(5) 0.035(6) 0.009(6)
 C43 0.109(10) 0.048(6) 0.067(7) -0.010(5) 0.044(7) -0.006(6)
 C4 0.112(11) 0.106(10) 0.057(7) 0.046(7) 0.018(7) 0.008(8)
 C10 0.112(10) 0.044(6) 0.032(5) 0.010(4) 0.024(6) 0.005(6)
 C40 0.067(7) 0.048(6) 0.045(5) 0.014(4) 0.022(5) 0.002(5)
 C9 0.110(11) 0.072(8) 0.057(7) 0.004(6) 0.019(7) 0.002(7)
 C39 0.075(8) 0.109(11) 0.067(8) 0.026(7) 0.024(7) -0.019(8)
 C12 0.042(5) 0.024(4) 0.016(3) -0.005(3) -0.007(3) -0.008(3)
 C28 0.032(4) 0.025(4) 0.040(4) 0.003(3) 0.003(4) 0.003(3)
 C15 0.032(4) 0.023(4) 0.043(4) -0.004(3) 0.005(4) -0.005(3)
 C21 0.026(4) 0.024(4) 0.049(5) -0.006(3) 0.010(4) 0.000(3)
 C20 0.028(4) 0.016(3) 0.053(5) -0.001(3) 0.011(4) -0.004(3)
 C34 0.086(8) 0.105(9) 0.040(6) 0.018(6) 0.010(6) -0.038(7)
 C37 0.155(15) 0.050(7) 0.085(9) 0.002(6) 0.049(10) -0.016(9)
 C38 0.117(12) 0.093(10) 0.065(8) -0.022(7) 0.022(8) -0.061(9)
 C42 0.213(17) 0.046(6) 0.023(5) -0.012(4) 0.018(7) -0.053(8)
 O1 0.060(5) 0.037(4) 0.103(6) -0.002(3) 0.028(4) -0.003(3)
 O2 0.065(5) 0.041(4) 0.091(5) 0.018(3) 0.028(4) -0.010(3)
 C32 0.143(10) 0.161(10) 0.128(10) 0.017(8) 0.030(8) -0.060(8)
 C33 0.021(6) 0.017(6) 0.010(6) 0.003(4) -0.005(4) -0.012(5)
 C33A 0.062(16) 0.083(19) 0.053(14) 0.003(12) -0.009(11) -0.020(14)

_geom_special_details
;
 All esds (except the esd in the dihedral angle between two l.s. planes)
 are estimated using the full covariance matrix.  The cell esds are taken
 into account individually in the estimation of esds in distances, angles
 and torsion angles; correlations between esds in cell parameters are only
 used when they are defined by crystal symmetry.  An approximate (isotropic)
 treatment of cell esds is used for estimating esds involving l.s. planes.
;
loop_
  _geom_bond_atom_site_label_1
  _geom_bond_atom_site_label_2
  _geom_bond_distance
  _geom_bond_site_symmetry_2
  _geom_bond_publ_flag
 Cd1 Cd2 3.8562(12) . ?
 Cd1 O8 2.437(5) . ?
 Cd1 O7 2.495(5) . ?
 Cd1 O5 2.385(5) . ?
 Cd1 O4 2.794(6) . ?
 Cd1 O6 2.399(5) . ?
 Cd1 N1 2.203(7) . ?
 Cd1 N8 2.229(7) . ?
 Cd1 C17 2.791(7) . ?
 Cd2 O8 2.380(5) . ?
 Cd2 O10 2.352(5) 2_454 ?
 Cd2 O7 2.461(5) . ?
 Cd2 O11 2.437(5) 2_454 ?
 Cd2 O9 2.458(5) . ?
 Cd2 N5 2.310(7) . ?
 Cd2 N4 2.203(7) . ?
 Cd2 C25 2.747(7) 2_454 ?
 Cd2 C18 2.746(7) . ?
 O8 C18 1.268(9) . ?
 O10 Cd2 2.352(5) 2_444 ?
 O10 C25 1.241(9) . ?
 O7 C17 1.268(9) . ?
 O5 C26 1.272(9) . ?
 O4 C26 1.247(9) . ?
 O12 H12 0.8198 . ?
 O12 C21 1.366(9) . ?
 O6 C17 1.241(9) . ?
 O11 Cd2 2.437(5) 2_444 ?
 O11 C25 1.261(8) . ?
 O9 C18 1.242(9) . ?
 O3 H3 0.8203 . ?
 O3 C29 1.360(9) . ?
 N3 C2 1.390(11) . ?
 N3 C3 1.341(11) . ?
 N3 C4 1.472(12) . ?
 N2 C14 1.331(11) . ?
 N2 C11 1.461(11) . ?
 N2 C12 1.293(9) . ?
 N7 C31 1.335(11) . ?
 N7 C34 1.474(11) . ?
 N7 C33 1.469(14) . ?
 N7 C33A 1.41(2) . ?
 N5 C44 1.314(11) . ?
 N5 C43 1.286(13) . ?
 N1 C14 1.331(10) . ?
 N1 C13 1.388(10) . ?
 N4 C3 1.361(11) . ?
 N4 C1 1.375(11) . ?
 N8 C31 1.302(11) . ?
 N8 C32 1.31(2) . ?
 N6 C44 1.332(13) . ?
 N6 C41 1.482(12) . ?
 N6 C42 1.307(12) . ?
 C14 H14 0.9300 . ?
 C2 H2 0.9300 . ?
 C2 C1 1.324(13) . ?
 C27 C26 1.510(10) . ?
 C27 C30 1.392(10) . ?
 C27 C28 1.379(10) . ?
 C25 Cd2 2.747(7) 2_444 ?
 C25 C23 1.505(9) . ?
 C29 C28 1.388(10) . ?
 C29 C15 1.380(9) 2_544 ?
 C44 H44 0.9300 . ?
 C13 H13 0.9300 . ?
 C13 C12 1.352(11) . ?
 C3 H3A 0.9300 . ?
 C19 C18 1.499(9) . ?
 C19 C24 1.395(10) . ?
 C19 C20 1.382(10) . ?
 C23 C22 1.376(10) . ?
 C23 C24 1.396(9) . ?
 C22 H22 0.9300 . ?
 C22 C21 1.380(10) . ?
 C8 H8 0.9300 . ?
 C8 C7 1.363(19) . ?
 C8 C9 1.382(16) . ?
 C1 H1 0.9300 . ?
 C24 H24 0.9300 . ?
 C17 C16 1.516(9) . ?
 C6 H6 0.9300 . ?
 C6 C5 1.371(15) . ?
 C6 C7 1.368(19) . ?
 C30 H30 0.9300 . ?
 C30 C16 1.385(10) 2_544 ?
 C16 C30 1.385(10) 2_554 ?
 C16 C15 1.381(10) . ?
 C5 C4 1.509(16) . ?
 C5 C10 1.389(15) . ?
 C35 C36 1.378(14) . ?
 C35 C40 1.389(13) . ?
 C35 C34 1.497(13) . ?
 C36 H36 0.9300 . ?
 C36 C37 1.343(17) . ?
 C41 H41A 0.9700 . ?
 C41 H41B 0.9700 . ?
 C41 C40 1.502(14) . ?
 C7 H7 0.9300 . ?
 C11 H11A 0.9700 . ?
 C11 H11B 0.9700 . ?
 C11 C10 1.503(13) . ?
 C43 H43 0.9300 . ?
 C43 C42 1.332(14) . ?
 C4 H4A 0.9700 . ?
 C4 H4B 0.9700 . ?
 C10 C9 1.374(16) . ?
 C40 C39 1.389(15) . ?
 C9 H9 0.9300 . ?
 C39 H39 0.9300 . ?
 C39 C38 1.389(18) . ?
 C12 H12A 0.9300 . ?
 C28 H28 0.9300 . ?
 C15 C29 1.380(9) 2_554 ?
 C15 H15 0.9300 . ?
 C21 C20 1.370(9) . ?
 C20 H20 0.9300 . ?
 C34 H34A 0.9700 . ?
 C34 H34B 0.9700 . ?
 C37 H37 0.9300 . ?
 C37 C38 1.332(19) . ?
 C38 H38 0.9300 . ?
 C42 H42 0.9300 . ?
 O1 H1A 0.8499 . ?
 O1 H1B 0.8500 . ?
 O2 H2A 0.8501 . ?
 O2 H2B 0.8500 . ?
 C32 C33 1.44(2) . ?
 C32 C33A 1.65(3) . ?
 C33 H33 0.9300 . ?

loop_
  _geom_angle_atom_site_label_1
  _geom_angle_atom_site_label_2
  _geom_angle_atom_site_label_3
  _geom_angle
  _geom_angle_site_symmetry_1
  _geom_angle_site_symmetry_3
  _geom_angle_publ_flag
 O8 Cd1 Cd2 36.32(11) . . ?
 O8 Cd1 O7 74.93(17) . . ?
 O8 Cd1 O4 93.51(16) . . ?
 O8 Cd1 C17 101.52(19) . . ?
 O7 Cd1 Cd2 38.61(12) . . ?
 O7 Cd1 O4 168.41(17) . . ?
 O7 Cd1 C17 27.02(19) . . ?
 O5 Cd1 Cd2 177.55(14) . . ?
 O5 Cd1 O8 143.19(17) . . ?
 O5 Cd1 O7 141.73(17) . . ?
 O5 Cd1 O4 49.77(17) . . ?
 O5 Cd1 O6 88.66(18) . . ?
 O5 Cd1 C17 114.8(2) . . ?
 O4 Cd1 Cd2 129.83(12) . . ?
 O6 Cd1 Cd2 91.61(13) . . ?
 O6 Cd1 O8 127.83(17) . . ?
 O6 Cd1 O7 53.07(17) . . ?
 O6 Cd1 O4 138.37(18) . . ?
 O6 Cd1 C17 26.3(2) . . ?
 N1 Cd1 Cd2 89.48(18) . . ?
 N1 Cd1 O8 87.8(2) . . ?
 N1 Cd1 O7 91.1(2) . . ?
 N1 Cd1 O5 88.1(2) . . ?
 N1 Cd1 O4 87.6(2) . . ?
 N1 Cd1 O6 89.1(2) . . ?
 N1 Cd1 N8 171.6(3) . . ?
 N1 Cd1 C17 87.4(2) . . ?
 N8 Cd1 Cd2 91.9(2) . . ?
 N8 Cd1 O8 88.4(2) . . ?
 N8 Cd1 O7 95.1(3) . . ?
 N8 Cd1 O5 90.5(3) . . ?
 N8 Cd1 O4 85.2(3) . . ?
 N8 Cd1 O6 99.1(3) . . ?
 N8 Cd1 C17 100.7(3) . . ?
 C17 Cd1 Cd2 65.35(16) . . ?
 C17 Cd1 O4 164.0(2) . . ?
 O8 Cd2 Cd1 37.32(12) . . ?
 O8 Cd2 O7 76.55(18) . . ?
 O8 Cd2 O11 139.34(17) . 2_454 ?
 O8 Cd2 O9 54.13(17) . . ?
 O8 Cd2 C25 165.85(19) . 2_454 ?
 O8 Cd2 C18 27.5(2) . . ?
 O10 Cd2 Cd1 128.64(14) 2_454 . ?
 O10 Cd2 O8 165.45(19) 2_454 . ?
 O10 Cd2 O7 89.56(18) 2_454 . ?
 O10 Cd2 O11 54.07(18) 2_454 2_454 ?
 O10 Cd2 O9 138.96(19) 2_454 . ?
 O10 Cd2 C25 26.75(19) 2_454 2_454 ?
 O10 Cd2 C18 163.8(2) 2_454 . ?
 O7 Cd2 Cd1 39.23(12) . . ?
 O7 Cd2 C25 116.2(2) . 2_454 ?
 O7 Cd2 C18 103.5(2) . . ?
 O11 Cd2 Cd1 173.78(13) 2_454 . ?
 O11 Cd2 O7 143.50(17) 2_454 . ?
 O11 Cd2 O9 85.24(17) 2_454 . ?
 O11 Cd2 C25 27.32(19) 2_454 2_454 ?
 O11 Cd2 C18 111.9(2) 2_454 . ?
 O9 Cd2 Cd1 91.30(12) . . ?
 O9 Cd2 O7 130.40(18) . . ?
 O9 Cd2 C25 112.4(2) . 2_454 ?
 O9 Cd2 C18 26.9(2) . . ?
 N5 Cd2 Cd1 85.28(18) . . ?
 N5 Cd2 O8 86.5(2) . . ?
 N5 Cd2 O10 88.3(2) . 2_454 ?
 N5 Cd2 O7 86.4(2) . . ?
 N5 Cd2 O11 89.3(2) . 2_454 ?
 N5 Cd2 O9 85.8(2) . . ?
 N5 Cd2 C25 88.3(2) . 2_454 ?
 N5 Cd2 C18 83.1(2) . . ?
 N4 Cd2 Cd1 86.52(18) . . ?
 N4 Cd2 O8 88.0(2) . . ?
 N4 Cd2 O10 95.4(2) . 2_454 ?
 N4 Cd2 O7 86.2(2) . . ?
 N4 Cd2 O11 99.0(2) . 2_454 ?
 N4 Cd2 O9 96.1(2) . . ?
 N4 Cd2 N5 171.6(3) . . ?
 N4 Cd2 C25 98.5(2) . 2_454 ?
 N4 Cd2 C18 94.9(2) . . ?
 C25 Cd2 Cd1 154.93(15) 2_454 . ?
 C18 Cd2 Cd1 64.43(16) . . ?
 C18 Cd2 C25 138.6(2) . 2_454 ?
 Cd2 O8 Cd1 106.36(18) . . ?
 C18 O8 Cd1 158.0(5) . . ?
 C18 O8 Cd2 92.5(4) . . ?
 C25 O10 Cd2 94.7(4) . 2_444 ?
 Cd2 O7 Cd1 102.16(18) . . ?
 C17 O7 Cd1 89.6(4) . . ?
 C17 O7 Cd2 164.5(5) . . ?
 C26 O5 Cd1 103.1(5) . . ?
 C26 O4 Cd1 84.4(5) . . ?
 C21 O12 H12 109.6 . . ?
 C17 O6 Cd1 94.8(4) . . ?
 C25 O11 Cd2 90.2(4) . 2_444 ?
 C18 O9 Cd2 89.6(4) . . ?
 C29 O3 H3 109.4 . . ?
 C2 N3 C4 126.8(8) . . ?
 C3 N3 C2 107.6(7) . . ?
 C3 N3 C4 125.4(9) . . ?
 C14 N2 C11 129.1(7) . . ?
 C12 N2 C14 107.2(7) . . ?
 C12 N2 C11 123.6(7) . . ?
 C31 N7 C34 129.1(9) . . ?
 C31 N7 C33 105.7(8) . . ?
 C31 N7 C33A 104.5(11) . . ?
 C33 N7 C34 117.2(9) . . ?
 C33A N7 C34 122.6(11) . . ?
 C44 N5 Cd2 127.3(7) . . ?
 C43 N5 Cd2 126.6(7) . . ?
 C43 N5 C44 105.9(8) . . ?
 C14 N1 Cd1 129.3(5) . . ?
 C14 N1 C13 100.4(7) . . ?
 C13 N1 Cd1 130.3(6) . . ?
 C3 N4 Cd2 130.3(6) . . ?
 C3 N4 C1 101.2(8) . . ?
 C1 N4 Cd2 128.5(7) . . ?
 C31 N8 Cd1 133.2(6) . . ?
 C31 N8 C32 105.0(10) . . ?
 C32 N8 Cd1 119.9(9) . . ?
 C44 N6 C41 125.3(10) . . ?
 C42 N6 C44 105.7(8) . . ?
 C42 N6 C41 128.9(9) . . ?
 N2 C14 H14 123.0 . . ?
 N1 C14 N2 114.1(8) . . ?
 N1 C14 H14 123.0 . . ?
 N3 C2 H2 128.2 . . ?
 C1 C2 N3 103.6(7) . . ?
 C1 C2 H2 128.2 . . ?
 C30 C27 C26 120.0(7) . . ?
 C28 C27 C26 120.0(7) . . ?
 C28 C27 C30 120.0(7) . . ?
 O10 C25 Cd2 58.5(4) . 2_444 ?
 O10 C25 O11 121.0(6) . . ?
 O10 C25 C23 120.3(6) . . ?
 O11 C25 Cd2 62.5(4) . 2_444 ?
 O11 C25 C23 118.6(6) . . ?
 C23 C25 Cd2 178.6(6) . 2_444 ?
 N8 C31 N7 111.2(8) . . ?
 O3 C29 C28 121.7(6) . . ?
 O3 C29 C15 118.5(6) . 2_544 ?
 C15 C29 C28 119.8(7) 2_544 . ?
 O5 C26 C27 118.6(7) . . ?
 O4 C26 O5 122.7(7) . . ?
 O4 C26 C27 118.6(7) . . ?
 N5 C44 N6 110.2(9) . . ?
 N5 C44 H44 124.9 . . ?
 N6 C44 H44 124.9 . . ?
 N1 C13 H13 124.5 . . ?
 C12 C13 N1 110.9(8) . . ?
 C12 C13 H13 124.5 . . ?
 N3 C3 N4 112.0(8) . . ?
 N3 C3 H3A 124.0 . . ?
 N4 C3 H3A 124.0 . . ?
 C24 C19 C18 122.6(7) . . ?
 C20 C19 C18 117.9(6) . . ?
 C20 C19 C24 119.3(6) . . ?
 C22 C23 C25 119.7(6) . . ?
 C22 C23 C24 121.4(7) . . ?
 C24 C23 C25 118.8(6) . . ?
 C23 C22 H22 120.2 . . ?
 C23 C22 C21 119.7(7) . . ?
 C21 C22 H22 120.2 . . ?
 C7 C8 H8 121.7 . . ?
 C7 C8 C9 116.6(14) . . ?
 C9 C8 H8 121.7 . . ?
 O8 C18 Cd2 60.0(3) . . ?
 O8 C18 C19 117.3(7) . . ?
 O9 C18 Cd2 63.5(4) . . ?
 O9 C18 O8 122.7(6) . . ?
 O9 C18 C19 119.9(7) . . ?
 C19 C18 Cd2 168.7(5) . . ?
 N4 C1 H1 122.6 . . ?
 C2 C1 N4 114.8(9) . . ?
 C2 C1 H1 122.6 . . ?
 C19 C24 C23 118.3(7) . . ?
 C19 C24 H24 120.8 . . ?
 C23 C24 H24 120.8 . . ?
 O7 C17 Cd1 63.4(4) . . ?
 O7 C17 C16 118.3(7) . . ?
 O6 C17 Cd1 58.9(4) . . ?
 O6 C17 O7 121.4(7) . . ?
 O6 C17 C16 120.3(7) . . ?
 C16 C17 Cd1 168.0(5) . . ?
 C5 C6 H6 119.1 . . ?
 C7 C6 H6 119.1 . . ?
 C7 C6 C5 121.7(14) . . ?
 C27 C30 H30 120.3 . . ?
 C16 C30 C27 119.4(7) 2_544 . ?
 C16 C30 H30 120.3 2_544 . ?
 C30 C16 C17 118.7(7) 2_554 . ?
 C15 C16 C17 120.8(7) . . ?
 C15 C16 C30 120.5(6) . 2_554 ?
 C6 C5 C4 120.3(13) . . ?
 C6 C5 C10 118.2(13) . . ?
 C10 C5 C4 121.6(11) . . ?
 C36 C35 C40 119.7(10) . . ?
 C36 C35 C34 118.1(11) . . ?
 C40 C35 C34 122.2(9) . . ?
 C35 C36 H36 119.6 . . ?
 C37 C36 C35 120.8(13) . . ?
 C37 C36 H36 119.6 . . ?
 N6 C41 H41A 109.2 . . ?
 N6 C41 H41B 109.2 . . ?
 N6 C41 C40 112.0(8) . . ?
 H41A C41 H41B 107.9 . . ?
 C40 C41 H41A 109.2 . . ?
 C40 C41 H41B 109.2 . . ?
 C8 C7 C6 121.5(13) . . ?
 C8 C7 H7 119.3 . . ?
 C6 C7 H7 119.3 . . ?
 N2 C11 H11A 108.9 . . ?
 N2 C11 H11B 108.9 . . ?
 N2 C11 C10 113.2(7) . . ?
 H11A C11 H11B 107.7 . . ?
 C10 C11 H11A 108.9 . . ?
 C10 C11 H11B 108.9 . . ?
 N5 C43 H43 125.1 . . ?
 N5 C43 C42 109.9(10) . . ?
 C42 C43 H43 125.1 . . ?
 N3 C4 C5 111.7(9) . . ?
 N3 C4 H4A 109.3 . . ?
 N3 C4 H4B 109.3 . . ?
 C5 C4 H4A 109.3 . . ?
 C5 C4 H4B 109.3 . . ?
 H4A C4 H4B 107.9 . . ?
 C5 C10 C11 123.6(11) . . ?
 C9 C10 C5 118.8(11) . . ?
 C9 C10 C11 117.6(11) . . ?
 C35 C40 C41 123.0(10) . . ?
 C35 C40 C39 117.8(10) . . ?
 C39 C40 C41 119.3(11) . . ?
 C8 C9 H9 118.4 . . ?
 C10 C9 C8 123.2(13) . . ?
 C10 C9 H9 118.4 . . ?
 C40 C39 H39 119.7 . . ?
 C38 C39 C40 120.7(12) . . ?
 C38 C39 H39 119.7 . . ?
 N2 C12 C13 107.2(7) . . ?
 N2 C12 H12A 126.4 . . ?
 C13 C12 H12A 126.4 . . ?
 C27 C28 C29 120.3(7) . . ?
 C27 C28 H28 119.9 . . ?
 C29 C28 H28 119.9 . . ?
 C29 C15 C16 120.1(7) 2_554 . ?
 C29 C15 H15 120.0 2_554 . ?
 C16 C15 H15 120.0 . . ?
 O12 C21 C22 119.4(6) . . ?
 O12 C21 C20 121.2(6) . . ?
 C20 C21 C22 119.4(7) . . ?
 C19 C20 H20 119.1 . . ?
 C21 C20 C19 121.9(7) . . ?
 C21 C20 H20 119.1 . . ?
 N7 C34 C35 112.8(8) . . ?
 N7 C34 H34A 109.0 . . ?
 N7 C34 H34B 109.0 . . ?
 C35 C34 H34A 109.0 . . ?
 C35 C34 H34B 109.0 . . ?
 H34A C34 H34B 107.8 . . ?
 C36 C37 H37 119.2 . . ?
 C38 C37 C36 121.6(13) . . ?
 C38 C37 H37 119.2 . . ?
 C39 C38 H38 120.3 . . ?
 C37 C38 C39 119.5(12) . . ?
 C37 C38 H38 120.3 . . ?
 N6 C42 C43 107.5(9) . . ?
 N6 C42 H42 126.3 . . ?
 C43 C42 H42 126.3 . . ?
 H1A O1 H1B 109.5 . . ?
 H2A O2 H2B 109.4 . . ?
 N8 C32 C33 113.9(13) . . ?
 N8 C32 C33A 97.3(14) . . ?
 N7 C33 H33 132.3 . . ?
 C32 C33 N7 95.3(10) . . ?
 C32 C33 H33 132.3 . . ?
 N7 C33A C32 89.1(15) . . ?

_shelx_res_file
;
TITL CF solution in P21/c P21/c
CELL 0.71073 14.631 18.462 15.946 90 98.955 90
ZERR 4 0.004 0.005 0.004 0 0.004 0
LATT 1
SYMM -X,0.5+Y,0.5-Z

SFAC  C 2.310 20.844 1.02 10.208 1.589 0.569 0.865 51.651 0.216 0.003 0.002 =
 11.5 0.68 12.01
SFAC  H 0.493 10.511 0.323 26.126 0.14 3.142 0.041 57.8 0.003 0 0 0.624 0.35 =
 1.008
SFAC  Cd 19.221 0.595 17.644 6.909 4.461 24.701 1.603 87.483 5.069 -0.808 =
 1.202 5180 1.69 112.41
SFAC  N 12.213 0.006 3.132 9.893 2.013 28.998 1.166 0.583 -11.529 0.006 =
 0.003 19.6 0.68 14.01
SFAC  O 3.049 13.277 2.287 5.701 1.546 0.324 0.867 32.909 0.251 0.011 0.006 =
 32.5 0.68 16
UNIT 176 160 8 32 48

ISOR 0.01 0.02 C33
ISOR 0.01 0.02 C32

L.S. 20
PLAN  6
BOND $H
fmap 2
acta
OMIT -3 50
OMIT -4 1 7
OMIT 11 1 7
OMIT -5 7 4
OMIT -1 18 4
OMIT -6 6 7
OMIT -2 1 7
REM <HKL>C:/Users/dlm/Desktop/cif%20? ? /EQU_34%20Cd/wang1.hkl</HKL>

WGHT    0.101200   10.898001
FVAR       0.06152   0.52981
CD1   3   -0.138209    0.468116   -0.242363    11.00000    0.03186    0.02080 =
         0.03692    0.00346    0.01157    0.00353
CD2   3   -0.391184    0.534475   -0.275989    11.00000    0.03201    0.01899 =
         0.04361    0.00456    0.01213    0.00540
O8    5   -0.298441    0.428876   -0.279151    11.00000    0.03701    0.01593 =
         0.06327    0.00039    0.00859   -0.00226
O10   5   -0.551794    0.150722   -0.246907    11.00000    0.03333    0.02222 =
         0.09412    0.00143    0.01714   -0.00225
O7    5   -0.232152    0.580565   -0.239002    11.00000    0.04226    0.02928 =
         0.06236    0.00331    0.01272   -0.00821
O5    5    0.018060    0.427094   -0.227993    11.00000    0.03783    0.02187 =
         0.06933    0.00465    0.01721    0.00406
O4    5   -0.067492    0.328946   -0.257288    11.00000    0.02755    0.03355 =
         0.12956    0.00557    0.01517    0.00284
O12   5   -0.143966    0.193848   -0.218347    11.00000    0.02796    0.02224 =
         0.09130   -0.00309    0.01688   -0.00152
AFIX   3
H12   2   -0.110386    0.229008   -0.221267    11.00000   -1.20000
AFIX   0
O6    5   -0.081194    0.589436   -0.219137    11.00000    0.03939    0.02256 =
         0.06553    0.00221    0.01455    0.00769
O11   5   -0.446391    0.067640   -0.215297    11.00000    0.03148    0.02418 =
         0.06589    0.00724    0.01099   -0.00606
O9    5   -0.448819    0.409710   -0.297330    11.00000    0.03227    0.02630 =
         0.07724    0.00898    0.00300    0.00636
O3    5    0.346896    0.333011   -0.191560    11.00000    0.03225    0.03013 =
         0.08299   -0.00569    0.00052   -0.00003
AFIX   3
H3    2    0.342346    0.377041   -0.186680    11.00000   -1.20000
AFIX   0
N3    4   -0.345281    0.604330   -0.529925    11.00000    0.07110    0.07251 =
         0.03357    0.01424    0.01262    0.00260
N2    4   -0.133442    0.531923   -0.506473    11.00000    0.07406    0.04252 =
         0.04056    0.00151    0.02722    0.01116
N7    4   -0.175531    0.393547    0.010955    11.00000    0.07299    0.10243 =
         0.03892    0.01666    0.00577   -0.03106
N5    4   -0.385294    0.511838   -0.132781    11.00000    0.05456    0.04358 =
         0.04566    0.03020    0.01584    0.01875
N1    4   -0.135383    0.481968   -0.379179    11.00000    0.03941    0.03316 =
         0.04156   -0.01221    0.01125   -0.00042
N4    4   -0.374687    0.554060   -0.409096    11.00000    0.04468    0.04202 =
         0.03841   -0.01734    0.00189    0.00667
N8    4   -0.144543    0.436986   -0.108309    11.00000    0.04711    0.09463 =
         0.03923    0.02568    0.00207   -0.02934
N6    4   -0.396697    0.458464   -0.013589    11.00000    0.09853    0.05196 =
         0.04813    0.01145    0.03110    0.02641
C14   1   -0.134076    0.542667   -0.424007    11.00000    0.09730    0.03845 =
         0.04532    0.00197    0.02869    0.00126
AFIX  43
H14   2   -0.133644    0.588541   -0.399854    11.00000   -1.20000
AFIX   0
C2    1   -0.378682    0.535074   -0.550578    11.00000    0.05526    0.04125 =
         0.02550   -0.00901   -0.00509   -0.00944
AFIX  43
H2    2   -0.391829    0.513916   -0.604025    11.00000   -1.20000
AFIX   0
C27   1    0.095610    0.313915   -0.238053    11.00000    0.02678    0.02763 =
         0.03757    0.00428    0.00950    0.00029
C25   1   -0.469328    0.132008   -0.234919    11.00000    0.02957    0.02079 =
         0.03892   -0.00353    0.01306   -0.00238
C31   1   -0.199249    0.394853   -0.073319    11.00000    0.05690    0.04986 =
         0.03340    0.00298    0.01280   -0.00073
C29   1    0.261129    0.303741   -0.212798    11.00000    0.02362    0.02856 =
         0.03785    0.00363    0.00715    0.00123
C26   1    0.009330    0.359234   -0.240564    11.00000    0.02581    0.03137 =
         0.06237    0.01188    0.01268    0.00553
C44   1   -0.420312    0.456025   -0.097687    11.00000    0.07085    0.04497 =
         0.06296    0.00297    0.03104    0.00792
AFIX  43
H44   2   -0.456364    0.420029   -0.127266    11.00000   -1.20000
AFIX   0
C13   1   -0.133238    0.430675   -0.442457    11.00000    0.09981    0.03074 =
         0.05219   -0.01453    0.01489   -0.00453
AFIX  43
H13   2   -0.130087    0.380919   -0.433360    11.00000   -1.20000
AFIX   0
C3    1   -0.348290    0.614875   -0.447177    11.00000    0.07482    0.04213 =
         0.04762   -0.00003    0.00876   -0.00007
AFIX  43
H3A   2   -0.334027    0.658568   -0.419153    11.00000   -1.20000
AFIX   0
C19   1   -0.349293    0.307903   -0.269396    11.00000    0.03006    0.01837 =
         0.03469   -0.00171    0.00592   -0.00180
C23   1   -0.394401    0.186294   -0.242722    11.00000    0.02940    0.02150 =
         0.03470   -0.00251    0.00661    0.00085
C22   1   -0.303089    0.165332   -0.226552    11.00000    0.03540    0.01825 =
         0.04070   -0.00461    0.00669   -0.00340
AFIX  43
H22   2   -0.287723    0.117884   -0.210585    11.00000   -1.20000
AFIX   0
C8    1   -0.067597    0.769418   -0.482743    11.00000    0.12510    0.07857 =
         0.07395   -0.00074    0.00963   -0.01772
AFIX  43
H8    2   -0.013678    0.793060   -0.458796    11.00000   -1.20000
AFIX   0
C18   1   -0.367872    0.387167   -0.283759    11.00000    0.04032    0.01673 =
         0.03629   -0.00210    0.00728   -0.00233
C1    1   -0.387349    0.506350   -0.476109    11.00000    0.07808    0.04909 =
         0.05954   -0.02663    0.01996   -0.01217
AFIX  43
H1    2   -0.400954    0.457654   -0.469645    11.00000   -1.20000
AFIX   0
C24   1   -0.419358    0.257953   -0.262679    11.00000    0.02608    0.02066 =
         0.04440   -0.00194    0.00719   -0.00080
AFIX  43
H24   2   -0.481135    0.272047   -0.271282    11.00000   -1.20000
AFIX   0
C17   1   -0.158822    0.618066   -0.233283    11.00000    0.03596    0.02177 =
         0.03675   -0.00252    0.00541   -0.00472
C6    1   -0.231209    0.766821   -0.524088    11.00000    0.14393    0.05592 =
         0.07443    0.01941    0.05021    0.02733
AFIX  43
H6    2   -0.287585    0.790821   -0.527845    11.00000   -1.20000
AFIX   0
C30   1    0.088350    0.240195   -0.256028    11.00000    0.02406    0.02628 =
         0.04565    0.00504    0.00164    0.00064
AFIX  43
H30   2    0.030525    0.218757   -0.270506    11.00000   -1.20000
AFIX   0
C16   1   -0.168030    0.699055   -0.247842    11.00000    0.03008    0.02209 =
         0.03033   -0.00281    0.00843    0.00081
C5    1   -0.229777    0.696815   -0.552474    11.00000    0.11265    0.04985 =
         0.04880    0.02011    0.02462    0.01050
C35   1   -0.297904    0.307385    0.036137    11.00000    0.08414    0.03776 =
         0.04175    0.00697    0.02862   -0.01101
C36   1   -0.275126    0.238425    0.013593    11.00000    0.10394    0.06775 =
         0.06258    0.02230    0.02853    0.00617
AFIX  43
H36   2   -0.213299    0.224575    0.020405    11.00000   -1.20000
AFIX   0
C41   1   -0.420590    0.402934    0.046529    11.00000    0.12033    0.07351 =
         0.08574    0.02681    0.07265    0.02547
AFIX  23
H41A  2   -0.487015    0.402886    0.045747    11.00000   -1.20000
H41B  2   -0.391327    0.415318    0.103541    11.00000   -1.20000
AFIX   0
C7    1   -0.151879    0.802304   -0.490379    11.00000    0.18856    0.04563 =
         0.06107   -0.00254    0.04659    0.00879
AFIX  43
H7    2   -0.155540    0.849949   -0.472260    11.00000   -1.20000
AFIX   0
C11   1   -0.133555    0.585200   -0.574241    11.00000    0.11003    0.05495 =
         0.04816    0.00858    0.03540    0.00922
AFIX  23
H11A  2   -0.183491    0.573936   -0.619867    11.00000   -1.20000
H11B  2   -0.075834    0.581438   -0.596730    11.00000   -1.20000
AFIX   0
C43   1   -0.340641    0.548682   -0.071170    11.00000    0.10931    0.04778 =
         0.06743   -0.01046    0.04450   -0.00629
AFIX  43
H43   2   -0.304566    0.589237   -0.077316    11.00000   -1.20000
AFIX   0
C4    1   -0.318791    0.659181   -0.588699    11.00000    0.11248    0.10564 =
         0.05668    0.04556    0.01810    0.00844
AFIX  23
H4A   2   -0.367825    0.694815   -0.600512    11.00000   -1.20000
H4B   2   -0.311413    0.636078   -0.641868    11.00000   -1.20000
AFIX   0
C10   1   -0.144929    0.661749   -0.545442    11.00000    0.11171    0.04423 =
         0.03191    0.01010    0.02428    0.00460
C40   1   -0.390133    0.328528    0.024724    11.00000    0.06720    0.04819 =
         0.04522    0.01401    0.02222    0.00205
C9    1   -0.066343    0.699126   -0.512409    11.00000    0.10979    0.07154 =
         0.05734    0.00405    0.01907    0.00158
AFIX  43
H9    2   -0.009507    0.676005   -0.509880    11.00000   -1.20000
AFIX   0
C39   1   -0.456279    0.278105   -0.009027    11.00000    0.07496    0.10887 =
         0.06742    0.02606    0.02436   -0.01949
AFIX  43
H39   2   -0.518595    0.290632   -0.016920    11.00000   -1.20000
AFIX   0
C12   1   -0.136340    0.462708   -0.519120    11.00000    0.04244    0.02428 =
         0.01640   -0.00524   -0.00653   -0.00761
AFIX  43
H12A  2   -0.139893    0.439337   -0.571192    11.00000   -1.20000
AFIX   0
C28   1    0.181511    0.345097   -0.215228    11.00000    0.03158    0.02459 =
         0.03974    0.00306    0.00285    0.00348
AFIX  43
H28   2    0.186136    0.394037   -0.201402    11.00000   -1.20000
AFIX   0
C15   1   -0.254042    0.730885   -0.267965    11.00000    0.03174    0.02348 =
         0.04345   -0.00409    0.00484   -0.00477
AFIX  43
H15   2   -0.307243    0.703202   -0.268555    11.00000   -1.20000
AFIX   0
C21   1   -0.234441    0.215059   -0.234146    11.00000    0.02599    0.02368 =
         0.04912   -0.00624    0.01010    0.00014
C20   1   -0.258151    0.285279   -0.255020    11.00000    0.02775    0.01569 =
         0.05346   -0.00118    0.01125   -0.00446
AFIX  43
H20   2   -0.211611    0.318675   -0.259649    11.00000   -1.20000
AFIX   0
C34   1   -0.221315    0.356413    0.074924    11.00000    0.08612    0.10468 =
         0.03978    0.01760    0.00976   -0.03774
AFIX  23
H34A  2   -0.246187    0.392406    0.109524    11.00000   -1.20000
H34B  2   -0.175710    0.328211    0.111863    11.00000   -1.20000
AFIX   0
C37   1   -0.341133    0.190966   -0.018100    11.00000    0.15472    0.04991 =
         0.08476    0.00202    0.04895   -0.01579
AFIX  43
H37   2   -0.324178    0.144278   -0.031279    11.00000   -1.20000
AFIX   0
C38   1   -0.430285    0.209186   -0.031098    11.00000    0.11682    0.09322 =
         0.06469   -0.02162    0.02155   -0.06100
AFIX  43
H38   2   -0.474795    0.176023   -0.054769    11.00000   -1.20000
AFIX   0
C42   1   -0.353749    0.520124    0.002709    11.00000    0.21253    0.04645 =
         0.02306   -0.01232    0.01811   -0.05342
AFIX  43
H42   2   -0.335653    0.540356    0.056123    11.00000   -1.20000
AFIX   0

O1    5    0.140825    0.534991   -0.253599    11.00000    0.05985    0.03730 =
         0.10293   -0.00166    0.02766   -0.00327
AFIX   3
H1A   2    0.143875    0.532961   -0.199989    11.00000   -1.20000
H1B   2    0.102045    0.567321   -0.273449    11.00000   -1.20000
AFIX   0

O2    5   -0.676334    0.478497   -0.224433    11.00000    0.06475    0.04083 =
         0.09116    0.01802    0.02802   -0.00982
AFIX   3
H2A   2   -0.643025    0.493347   -0.260113    11.00000   -1.20000
H2B   2   -0.728454    0.499797   -0.233283    11.00000   -1.20000
AFIX   0

C32   1   -0.101629    0.476331   -0.045909    11.00000    0.14256    0.16141 =
         0.12819    0.01729    0.03032   -0.05970
PART 1
C33   1   -0.133523    0.464480    0.034173    21.00000    0.02087    0.01694 =
         0.01036    0.00319   -0.00496   -0.01232
PART 0
AFIX  43
H33   2   -0.129047    0.492133    0.083392    11.00000   -1.20000
AFIX   0
PART 2
C33A  1   -0.080751    0.410637    0.024917   -21.00000    0.06166    0.08293 =
         0.05279    0.00272   -0.00936   -0.02031
HKLF 4 1 -1 0 0 0 1 0 0 0 -1

REM  CF solution in P21/c P21/c
REM R1 =  0.0634 for    5229 Fo > 4sig(Fo)  and  0.0861 for all    7423 data
REM    605 parameters refined using     12 restraints

END

WGHT      0.1012     10.8843

REM Highest difference peak  2.175,  deepest hole -1.866,  1-sigma level  0.145
Q1    1  -0.6067  0.4660 -0.1673  11.00000  0.05    2.18
Q2    1  -0.1377  0.4680 -0.0721  11.00000  0.05    1.41
Q3    1  -0.0550  0.4281 -0.0459  11.00000  0.05    1.39
Q4    1  -0.3987  0.5336 -0.1072  11.00000  0.05    1.33
Q5    1  -0.3339  0.5329 -0.1348  11.00000  0.05    1.30
Q6    1  -0.3852  0.5397  0.0197  11.00000  0.05    1.30
;
_shelx_res_checksum               80695
_shelx_hkl_file
;
   0   0  -2  532.05    4.61
   0   0  -3    0.32    0.14
   0   0  -4 3546.79   40.53
   0   0   4 3464.79   16.39
   0   0   4 3556.14   17.25
   0   0  -5    0.04    0.18
   0   0   5    0.05    0.26
   0   0   5   -0.01    0.15
   0   0  -6  778.65    4.81
   0   0   6  830.30    5.78
   0   0   6  844.74    6.23
   0   0  -7   -0.19    0.22
   0   0   7    0.08    0.30
   0   0   7   -0.27    0.22
   0   0  -8  320.78    3.33
   0   0   8  331.71    4.17
   0   0   8  334.01    4.50
   0   0  -9   -0.23    0.26
   0   0   9   -0.37    0.27
   0   0   9   -0.24    0.25
   0   0 -10   40.20    1.40
   0   0  10   36.98    1.67
   0   0  10   38.32    1.76
   0   0  11   -0.28    0.40
   0   0  11    0.06    0.37
   0   0  12   10.43    1.13
   0   0  12    9.81    1.09
   0   0  13   -0.39    0.41
   0   0  13   -0.01    0.42
   0   0  14    0.08    0.51
   0   0  14    0.04    0.48
   0   0  15   -0.23    0.55
   0   0  15   -0.22    0.50
   0   0  16    0.10    0.58
   0   0  17   -0.12    0.52
   0   0  18    0.50    0.69
   0   0  19   -0.04    0.71
   0   0  20    1.08    0.99
   0   0  21   -0.31    0.85
   0   1   0    0.01    0.02
   0   1  -1    1.73    0.14
   0   1   1    3.90    0.18
   0  -1  -2    0.06    0.06
   0  -1  -2    0.01    0.05
   0   1  -2    0.77    0.14
   0  -1   3    7.27    0.46
   0   1  -3    6.98    0.42
   0  -1  -4   85.09    1.23
   0  -1   4   88.90    1.71
   0   1  -4   81.31    1.32
   0   1   4   81.68    1.59
   0   1   4   85.39    1.53
   0  -1  -5   17.04    0.64
   0  -1   5   15.56    0.74
   0  -1   5   16.68    0.85
   0   1  -5   16.60    0.72
   0   1   5   14.94    0.84
   0   1   5   16.40    0.79
   0  -1  -6    3.11    0.38
   0  -1   6    2.65    0.40
   0  -1   6    2.43    0.44
   0   1  -6    2.26    0.41
   0   1   6    3.12    0.50
   0   1   6    2.58    0.42
   0  -1  -7   47.18    1.20
   0  -1   7   44.73    1.40
   0  -1   7   47.40    1.66
   0   1  -7   46.03    1.28
   0   1   7   48.39    1.62
   0   1   7   46.01    1.55
   0  -1  -8   29.09    1.05
   0  -1   8   27.69    1.22
   0  -1   8   29.20    1.41
   0   1  -8   28.73    1.13
   0   1   8   29.61    1.38
   0   1   8   29.54    1.35
   0  -1  -9    5.55    0.64
   0  -1   9    4.55    0.66
   0  -1   9    5.29    0.75
   0   1  -9    6.43    0.72
   0   1   9    6.57    0.79
   0   1   9    5.83    0.74
   0  -1 -10    4.86    0.61
   0  -1  10    5.53    0.75
   0  -1  10    3.83    0.72
   0   1 -10    4.37    0.62
   0   1  10    5.57    0.80
   0   1  10    4.84    0.74
   0  -1  11    8.47    0.98
   0  -1  11    6.01    0.89
   0   1  11    8.36    1.02
   0   1  11    9.50    1.00
   0  -1  12    2.30    0.64
   0  -1  12    3.44    0.78
   0   1  12    2.17    0.68
   0   1  12    1.78    0.62
   0  -1  13    0.29    0.50
   0  -1  13    0.26    0.47
   0   1  13    0.32    0.54
   0   1  13    0.23    0.44
   0  -1  14    0.87    0.64
   0  -1  14    1.25    0.63
   0   1  14    1.11    0.69
   0   1  14    1.36    0.67
   0  -1  15   -0.11    0.53
   0   1  15   -0.32    0.53
   0   1  15   -0.47    0.46
   0  -1  16    0.23    0.59
   0   1  16    0.60    0.74
   0   1  16   -0.28    0.53
   0  -1  17    1.39    0.77
   0   1  17    1.30    0.75
   0  -1  18   -0.76    0.54
   0   1  18    0.24    0.69
   0  -1  19    1.75    0.98
   0   1  19    1.48    0.94
   0  -1  20   -0.32    0.77
   0  -1  21    2.83    1.30
   0   2   0  600.52    3.89
   0   2  -1    1.84    0.21
   0   2   1    1.67    0.17
   0   2  -2  120.48    1.51
   0   2   2  121.69    1.40
   0  -2   3    5.64    0.44
   0   2  -3    4.87    0.44
   0   2   3    6.23    0.37
   0   2   3    5.39    0.52
   0  -2  -4   14.57    0.55
   0  -2  -4   14.00    0.53
   0  -2   4   12.86    0.71
   0   2  -4   13.38    0.68
   0   2   4   12.83    0.74
   0   2   4   13.16    0.59
   0  -2  -5    7.06    0.45
   0  -2   5    6.06    0.59
   0   2  -5    7.24    0.59
   0   2   5    6.09    0.68
   0   2   5    7.25    0.54
   0  -2  -6  142.70    1.93
   0  -2   6  128.11    1.98
   0  -2   6  149.10    2.75
   0   2  -6  141.47    2.15
   0   2   6  145.73    2.66
   0   2   6  149.29    2.43
   0  -2  -7    1.28    0.30
   0  -2   7    0.63    0.30
   0  -2   7    0.62    0.32
   0   2  -7    0.97    0.37
   0   2   7    0.67    0.38
   0   2   7    0.64    0.29
   0  -2  -8   26.03    0.98
   0  -2   8   21.85    1.06
   0  -2   8   23.35    1.29
   0   2  -8   25.79    1.12
   0   2   8   21.78    1.23
   0   2   8   25.50    1.23
   0  -2  -9    1.03    0.35
   0  -2   9    0.91    0.40
   0  -2   9    1.30    0.47
   0   2  -9    1.17    0.42
   0   2   9    1.15    0.49
   0   2   9    0.87    0.39
   0  -2 -10    2.73    0.51
   0  -2  10    2.20    0.53
   0  -2  10    2.56    0.64
   0   2 -10    2.76    0.54
   0   2  10    2.17    0.63
   0   2  10    2.01    0.53
   0  -2  11    1.08    0.51
   0  -2  11    0.81    0.46
   0   2 -11    1.49    0.50
   0   2  11    1.44    0.61
   0   2  11    1.09    0.47
   0  -2  12    0.09    0.43
   0  -2  12    0.31    0.48
   0   2  12    0.80    0.60
   0   2  12    0.73    0.49
   0  -2  13    0.60    0.51
   0  -2  13    0.60    0.50
   0   2  13    0.39    0.56
   0   2  13    0.36    0.47
   0  -2  14    1.20    0.64
   0   2  14    0.51    0.61
   0   2  14    0.69    0.61
   0  -2  15    2.81    0.90
   0   2  15    3.60    0.98
   0   2  15    4.03    0.95
   0  -2  16   -0.25    0.47
   0   2  16   -0.01    0.65
   0   2  16   -0.03    0.54
   0  -2  17    0.44    0.68
   0   2  17    1.23    0.81
   0   2  17    0.63    0.70
   0  -2  18   -0.11    0.63
   0   2  18    0.88    0.78
   0  -2  19    0.15    0.74
   0  -2  20   -0.35    0.76
   0   3   0    0.07    0.11
   0   3  -1    1.35    0.24
   0   3   1    1.56    0.23
   0  -3   2    0.76    0.19
   0   3  -2    0.45    0.21
   0   3   2    0.78    0.18
   0   3   2    0.72    0.23
   0  -3   3    0.59    0.21
   0   3  -3    0.36    0.23
   0   3   3    0.59    0.19
   0   3   3    0.56    0.30
   0  -3   4    6.97    0.55
   0   3  -4    6.87    0.57
   0   3   4    9.94    0.52
   0   3   4    6.80    0.62
   0  -3  -5   14.44    0.65
   0  -3  -5   14.64    0.65
   0  -3   5   13.79    0.84
   0   3  -5   14.23    0.78
   0   3   5   13.86    0.91
   0   3   5   14.72    0.69
   0  -3   6    0.26    0.23
   0  -3   6    0.48    0.29
   0   3  -6    0.68    0.32
   0   3   6    0.38    0.33
   0   3   6    0.94    0.28
   0  -3  -7    3.50    0.42
   0  -3   7    2.49    0.39
   0  -3   7    3.37    0.56
   0   3  -7    4.08    0.55
   0   3   7    2.64    0.55
   0   3   7    3.31    0.47
   0  -3  -8   47.40    1.30
   0  -3   8   31.68    1.18
   0  -3   8   34.54    1.60
   0   3  -8   36.81    1.36
   0   3   8   37.07    1.62
   0   3   8   37.32    1.44
   0  -3  -9    3.79    0.54
   0  -3   9    4.59    0.58
   0  -3   9    3.59    0.66
   0   3  -9    4.65    0.64
   0   3   9    3.27    0.68
   0   3   9    4.74    0.64
   0  -3 -10   11.30    0.83
   0  -3  10    9.57    0.88
   0  -3  10    9.86    1.02
   0   3 -10   11.96    0.94
   0   3  10    9.34    1.06
   0   3  10   10.60    0.94
   0  -3  11    3.08    0.59
   0   3  11    3.02    0.76
   0  -3  12    9.03    1.08
   0   3  12    9.71    1.18
   0   3  12   10.20    1.05
   0  -3  13    0.39    0.47
   0   3  13    1.01    0.62
   0   3  13    0.04    0.40
   0  -3  14   10.78    1.32
   0   3  14   13.04    1.43
   0   3  14   10.50    1.23
   0  -3  15    1.56    0.78
   0   3  15    1.40    0.84
   0   3  15    0.69    0.64
   0  -3  16    4.64    1.12
   0   3  16    4.86    1.12
   0   3  16    4.90    1.03
   0  -3  17    1.78    0.85
   0   3  17    1.97    0.90
   0   3  17    2.54    0.94
   0  -3  18    1.19    0.81
   0   3  18    0.94    0.87
   0  -3  19    0.88    0.84
   0  -3  20    0.89    0.93
   0   4   0  315.99    3.01
   0   4  -1    0.37    0.23
   0   4   1    0.31    0.18
   0   4   1    0.48    0.22
   0  -4   2   24.60    0.84
   0   4  -2   30.40    1.00
   0   4   2   29.44    0.90
   0   4   2   27.05    0.97
   0  -4   3    1.53    0.30
   0   4  -3    1.58    0.35
   0   4   3    1.59    0.28
   0   4   3    1.54    0.35
   0  -4   4  150.57    2.51
   0   4  -4  165.36    2.45
   0   4   4  180.59    2.29
   0   4   4  149.74    2.56
   0  -4   5    2.17    0.40
   0   4  -5    2.56    0.43
   0   4   5    2.88    0.36
   0   4   5    1.89    0.43
   0   4   5    2.05    0.29
   0  -4  -6   11.24    0.66
   0  -4  -6   10.80    0.64
   0  -4   6    8.85    0.77
   0   4  -6   10.19    0.76
   0   4   6    7.56    0.75
   0   4   6    9.57    0.62
   0  -4  -7    7.25    0.58
   0  -4   7    6.32    0.53
   0  -4   7    7.37    0.76
   0   4  -7    6.99    0.71
   0   4   7    7.23    0.84
   0   4   7    7.19    0.61
   0  -4  -8  124.91    2.17
   0  -4   8  100.03    1.87
   0  -4   8  108.48    2.83
   0   4  -8  124.78    2.51
   0   4   8  113.48    2.86
   0   4   8  117.20    2.44
   0  -4  -9   23.27    1.03
   0  -4   9   21.39    1.00
   0  -4   9   21.79    1.38
   0   4  -9   26.40    1.28
   0   4   9   22.19    1.40
   0   4   9   22.74    1.19
   0  -4 -10    7.86    0.74
   0  -4  10    7.78    0.78
   0  -4  10    6.63    0.92
   0   4 -10    9.41    0.92
   0   4  10    7.28    0.98
   0   4  10    8.37    0.83
   0   4 -11   23.85    1.32
   0   4  11   23.74    1.39
   0  -4  12    4.17    0.88
   0   4  12    4.70    0.92
   0   4  12    5.96    0.85
   0  -4  13   13.67    1.38
   0   4  13   15.14    1.46
   0   4  13   14.70    1.29
   0  -4  14    1.85    0.78
   0   4  14    1.61    0.80
   0   4  14    1.69    0.70
   0  -4  15   13.91    1.56
   0   4  15   14.86    1.61
   0   4  15   17.03    1.53
   0  -4  16    0.06    0.58
   0   4  16    0.70    0.79
   0  -4  17    4.91    1.19
   0   4  17    6.36    1.30
   0  -4  18    0.04    0.68
   0   4  18    0.17    0.80
   0  -4  19    3.92    1.27
   0  -4  20    0.10    0.83
   0   5   0    0.10    0.18
   0  -5   1    1.82    0.28
   0   5  -1    1.66    0.34
   0   5   1    2.02    0.34
   0   5   1    1.94    0.34
   0  -5   2   19.31    0.80
   0   5  -2   20.30    0.93
   0   5   2   20.48    0.85
   0   5   2   18.57    0.88
   0  -5   3    0.00    0.15
   0   5  -3   -0.17    0.19
   0   5   3    0.03    0.14
   0   5   3    0.02    0.23
   0  -5   4    1.86    0.37
   0   5  -4    2.78    0.47
   0   5   4    2.76    0.38
   0   5   4    2.37    0.48
   0  -5   5    0.59    0.27
   0   5  -5    0.17    0.28
   0   5   5    0.57    0.22
   0   5   5    0.28    0.33
   0  -5   6   26.84    1.31
   0   5  -6   27.48    1.22
   0   5   6   33.35    1.15
   0   5   6   25.38    1.31
   0   5   6   28.83    1.00
   0  -5  -7    7.81    0.64
   0  -5  -7    6.97    0.61
   0  -5   7    5.90    0.69
   0   5  -7    6.14    0.72
   0   5   7    4.96    0.71
   0   5   7    7.07    0.60
   0  -5  -8   65.81    1.67
   0  -5   8   47.97    1.22
   0  -5   8   54.28    2.07
   0   5  -8   59.50    1.87
   0   5   8   53.22    2.07
   0   5   8   56.84    1.67
   0  -5  -9    8.81    0.73
   0  -5   9    8.58    0.66
   0  -5   9    7.20    0.88
   0   5  -9    8.41    0.86
   0   5   9    8.82    0.99
   0   5   9    8.71    0.77
   0  -5 -10   41.48    1.45
   0  -5  10   33.72    1.84
   0   5 -10   39.54    1.66
   0   5  10   35.09    1.87
   0   5  10   37.35    1.59
   0  -5  11    3.48    0.81
   0   5 -11    3.15    0.68
   0   5  11    2.26    0.75
   0   5  11    2.74    0.59
   0  -5  12   12.23    1.29
   0   5  12   12.42    1.34
   0   5  12   12.11    1.09
   0  -5  13    1.39    0.68
   0   5  13    1.18    0.74
   0   5  13    1.43    0.59
   0  -5  14   32.09    2.19
   0   5  14   32.12    2.17
   0  -5  15    0.41    0.65
   0   5  15    1.19    0.84
   0  -5  16    2.79    0.99
   0   5  16    5.93    1.26
   0  -5  17    0.14    0.65
   0   5  17    0.20    0.75
   0  -5  18    0.52    0.77
   0   5  18    2.15    1.05
   0  -5  19    0.13    0.77
   0   5  19    1.36    0.99
   0  -5  20    0.50    0.92
   0   6   0   39.31    1.30
   0   6   0   36.55    1.03
   0  -6   1    0.19    0.19
   0   6  -1    0.06    0.22
   0   6   1    0.22    0.21
   0   6   1    0.28    0.24
   0  -6   2   29.07    1.03
   0   6  -2   31.55    1.22
   0   6   2   31.52    1.14
   0   6   2   28.20    1.11
   0  -6   3    0.50    0.25
   0   6  -3    0.34    0.29
   0   6   3    0.23    0.19
   0   6   3   -0.01    0.27
   0  -6   4   19.36    1.01
   0   6  -4   20.52    1.05
   0   6   4   21.69    0.97
   0   6   4   18.50    1.07
   0  -6   5    3.21    0.52
   0   6  -5    3.53    0.56
   0   6   5    4.01    0.50
   0   6   5    3.84    0.62
   0  -6   6    2.25    0.50
   0   6  -6    2.75    0.55
   0   6   6    3.24    0.47
   0   6   6    2.31    0.54
   0  -6   7   10.46    0.92
   0   6  -7   11.31    0.94
   0   6   7   13.89    0.86
   0   6   7   11.94    1.06
   0   6   7   10.87    0.69
   0  -6  -8   21.78    1.07
   0  -6  -8   18.78    1.00
   0  -6   8   17.96    1.25
   0   6  -8   16.14    1.14
   0   6   8   18.23    1.33
   0   6   8   17.45    0.95
   0  -6  -9   28.79    1.24
   0  -6   9   24.82    1.54
   0   6  -9   29.52    1.51
   0   6   9   21.47    1.48
   0   6   9   27.91    1.27
   0  -6  10    4.23    0.82
   0   6 -10    5.00    0.82
   0   6  10    3.61    0.80
   0   6  10    4.74    0.65
   0  -6  11   19.80    1.53
   0   6 -11   22.15    1.38
   0   6  11   18.64    1.50
   0   6  11   20.76    1.27
   0  -6  12    0.52    0.51
   0   6  12    0.21    0.53
   0  -6  13   15.25    1.53
   0   6  13   16.80    1.64
   0  -6  14    0.22    0.58
   0   6  14    0.82    0.71
   0  -6  15   19.13    1.83
   0   6  15   22.28    1.98
   0  -6  16    0.11    0.62
   0   6  16    0.33    0.77
   0  -6  17    6.11    1.37
   0   6  17    7.90    1.47
   0  -6  18   -0.05    0.72
   0   6  18   -0.18    0.79
   0  -6  19    2.05    1.10
   0   6  19    2.83    1.26
   0  -6  20   -0.59    0.79
   0   6  20    0.91    1.10
   0  -7   0    1.66    0.31
   0   7   0    0.02    0.20
   0   7   0    0.14    0.19
   0  -7   1    0.58    0.25
   0   7  -1   -0.04    0.19
   0   7  -1    0.13    0.18
   0   7   1    0.09    0.19
   0   7   1    0.14    0.24
   0  -7   2   35.45    1.19
   0   7  -2   41.82    1.50
   0   7   2   41.40    1.42
   0   7   2   37.51    1.34
   0  -7   3    8.51    0.69
   0   7  -3   10.12    0.82
   0   7   3   10.16    0.76
   0   7   3    9.78    0.81
   0  -7   4  104.72    2.36
   0   7  -4  120.44    2.60
   0   7   4  128.86    2.48
   0   7   4  108.84    2.52
   0  -7   5    3.67    0.57
   0   7  -5    5.58    0.71
   0   7   5    4.55    0.56
   0   7   5    4.57    0.67
   0  -7   6  135.49    3.04
   0   7  -6  159.35    3.14
   0   7   6  162.37    2.85
   0   7   6  136.59    3.14
   0  -7   7   11.13    0.98
   0   7  -7   11.26    0.98
   0   7   7   12.36    0.86
   0   7   7    9.90    1.04
   0   7   7    9.19    0.64
   0  -7   8  115.32    3.13
   0   7  -8  124.91    2.95
   0   7   8  108.92    3.09
   0   7   8  123.95    2.33
   0  -7  -9    0.14    0.34
   0  -7  -9    0.37    0.33
   0  -7   9    0.09    0.31
   0   7  -9    0.09    0.42
   0   7   9   -0.15    0.44
   0   7   9    0.25    0.30
   0  -7  10   80.83    2.89
   0   7 -10   92.42    2.70
   0   7  10   81.68    2.93
   0  -7  11    1.50    0.61
   0   7 -11    1.02    0.56
   0   7  11    1.27    0.67
   0  -7  12   23.02    1.76
   0   7 -12   24.62    1.57
   0   7  12   25.31    1.90
   0  -7  13    2.06    0.79
   0   7  13    3.32    0.95
   0  -7  14   47.67    2.70
   0   7  14   52.68    2.83
   0  -7  15    0.03    0.61
   0   7  15    0.68    0.82
   0  -7  16    4.36    1.18
   0   7  16    5.55    1.29
   0  -7  17   -0.27    0.66
   0   7  17    0.20    0.79
   0  -7  18    4.86    1.35
   0   7  18    5.11    1.37
   0  -7  19    0.21    0.79
   0   7  19    0.23    0.94
   0  -7  20    1.03    1.03
   0   7  20    1.05    1.11
   0  -8   0  153.84    2.17
   0   8   0  163.38    3.02
   0   8   0  152.13    2.38
   0  -8   1    3.88    0.47
   0   8  -1    3.49    0.57
   0   8  -1    3.62    0.42
   0   8   1    4.61    0.62
   0   8   1    3.56    0.50
   0  -8   2   16.81    0.89
   0   8  -2   17.55    1.08
   0   8  -2   16.78    0.68
   0   8   2   17.91    1.03
   0   8   2   16.54    0.98
   0   8  -3    6.69    0.77
   0   8   3    7.69    0.73
   0   8   3    6.56    0.76
   0  -8   4   22.52    1.18
   0   8  -4   25.28    1.32
   0   8   4   27.10    1.26
   0   8   4   22.87    1.28
   0  -8   5    6.99    0.76
   0   8  -5    7.25    0.83
   0   8   5    6.45    0.69
   0   8   5    6.24    0.81
   0  -8   6   15.79    1.12
   0   8  -6   20.02    1.25
   0   8   6   21.77    1.16
   0   8   6   17.90    1.26
   0  -8   7   10.48    0.98
   0   8  -7   12.64    1.09
   0   8   7   16.50    1.05
   0   8   7    9.42    1.03
   0   8   7   10.52    0.67
   0  -8   8   -0.14    0.27
   0   8  -8   -0.01    0.37
   0   8   8    0.39    0.32
   0   8   8    0.42    0.53
   0  -8  -9   29.12    1.40
   0  -8  -9   26.85    1.35
   0  -8   9   23.42    1.58
   0   8  -9   27.78    1.59
   0   8   9   24.49    1.70
   0  -8  10    0.08    0.36
   0   8 -10   -0.04    0.45
   0   8  10    0.12    0.50
   0  -8  11   19.00    1.57
   0   8 -11   24.65    1.57
   0   8  11   22.52    1.78
   0  -8  12   -0.16    0.46
   0   8 -12   -0.02    0.43
   0   8  12    0.18    0.68
   0  -8  13   17.74    1.68
   0   8  13   22.31    1.94
   0  -8  14    0.06    0.57
   0   8  14   -0.04    0.69
   0  -8  15   21.24    1.97
   0   8  15   23.66    2.10
   0  -8  16   -0.37    0.55
   0   8  16    0.58    0.84
   0  -8  17    4.50    1.22
   0   8  17    4.66    1.29
   0  -8  18    0.39    0.80
   0   8  18    0.65    0.96
   0  -8  19    5.17    1.47
   0   8  19    5.64    1.53
   0   9   0   -0.02    0.23
   0   9   0    0.19    0.26
   0  -9   1    3.18    0.47
   0   9  -1    2.01    0.51
   0   9  -1    2.51    0.39
   0   9   1    2.37    0.51
   0   9   1    2.47    0.46
   0  -9   2   13.33    0.85
   0   9  -2   13.13    1.02
   0   9  -2   12.92    0.65
   0   9   2   14.33    0.99
   0   9   2   12.74    0.92
   0  -9   3    0.32    0.28
   0   9  -3    0.09    0.31
   0   9   3    0.02    0.23
   0   9   3    0.26    0.33
   0  -9   4   22.14    1.20
   0   9  -4   23.70    1.37
   0   9   4   27.16    1.33
   0   9   4   20.79    1.28
   0  -9   5    2.40    0.52
   0   9  -5    3.18    0.64
   0   9   5    1.18    0.38
   0   9   5    1.03    0.46
   0  -9   6   83.06    2.53
   0   9  -6   92.21    2.67
   0   9   6   94.59    2.46
   0   9   6   81.56    2.62
   0  -9   7    2.57    0.63
   0   9  -7    3.69    0.72
   0   9   7    3.80    0.63
   0   9   7    3.15    0.72
   0  -9   8   49.07    2.18
   0   9  -8   51.01    2.11
   0   9   8   77.36    2.27
   0   9   8   51.88    2.34
   0  -9   9    1.52    0.58
   0   9  -9    1.71    0.64
   0   9   9    3.06    0.60
   0   9   9    1.28    0.71
   0  -9  10   34.52    2.02
   0   9 -10   39.49    1.98
   0   9  10   35.05    2.11
   0  -9  11    0.30    0.55
   0   9 -11    1.21    0.62
   0   9  11    0.68    0.70
   0  -9  12   25.60    1.93
   0   9 -12   32.87    1.90
   0   9  12   26.72    2.06
   0  -9  13    3.73    1.03
   0   9  13    3.43    1.04
   0  -9  14   22.53    2.00
   0   9  14   24.90    2.13
   0  -9  15   -0.08    0.56
   0   9  15   -0.04    0.72
   0  -9  16    6.23    1.37
   0   9  16    4.42    1.25
   0  -9  17   -0.17    0.63
   0   9  17    0.01    0.85
   0  -9  18    3.76    1.29
   0   9  18    5.81    1.48
   0  -9  19    0.14    0.87
   0   9  19    0.61    0.99
   0  10   0   29.55    1.48
   0  10   0   29.39    1.21
   0 -10   1    3.60    0.51
   0  10  -1    4.39    0.69
   0  10  -1    4.51    0.52
   0  10   1    4.56    0.69
   0  10   1    4.74    0.61
   0 -10   2   41.30    1.49
   0  10  -2   45.03    1.86
   0  10  -2   41.47    1.20
   0  10   2   43.62    1.77
   0  10   2   40.96    1.61
   0 -10   3    0.07    0.26
   0  10  -3    0.01    0.29
   0  10   3    0.02    0.22
   0  10   3    0.22    0.34
   0 -10   4    8.32    0.82
   0  10  -4    8.90    0.95
   0  10   4   11.28    0.96
   0  10   4    9.70    0.94
   0 -10   5    0.35    0.33
   0  10  -5    0.90    0.48
   0  10   5    0.61    0.35
   0  10   5    0.16    0.45
   0 -10   6   39.08    1.81
   0  10  -6   43.41    1.96
   0  10   6   44.38    1.80
   0  10   6   41.09    1.98
   0 -10   7    6.18    0.89
   0  10  -7    6.31    0.92
   0  10   7    6.28    0.76
   0  10   7    5.74    0.92
   0 -10   8    6.44    0.95
   0  10  -8    6.94    0.99
   0  10   8    7.74    0.87
   0  10   8    6.38    1.03
   0 -10   9   12.92    1.27
   0  10  -9   14.99    1.33
   0  10   9   19.01    1.27
   0  10   9   15.95    1.46
   0 -10  10    2.78    0.81
   0  10 -10    1.75    0.69
   0  10  10    0.94    0.69
   0 -10  11   11.17    1.33
   0  10 -11   14.28    1.37
   0  10  11   12.23    1.42
   0 -10  12    4.39    1.03
   0  10 -12    5.40    1.00
   0  10  12    4.51    1.12
   0 -10  13   16.28    1.70
   0  10  13   17.72    1.84
   0 -10  14    0.42    0.64
   0  10  14    0.69    0.76
   0 -10  15    5.51    1.26
   0  10  15    6.55    1.39
   0 -10  16   -0.03    0.67
   0  10  16    0.07    0.82
   0 -10  17    5.81    1.40
   0  10  17    7.42    1.57
   0 -10  18   -0.23    0.75
   0  10  18   -0.51    0.90
   0 -10  19    2.97    1.30
   0  10  19    1.78    1.18
   0  11   0   -0.23    0.21
   0  11   0    0.27    0.29
   0 -11   1    0.63    0.35
   0  11  -1   -0.07    0.28
   0  11  -1   -0.07    0.25
   0  11   1   -0.04    0.27
   0  11   1    0.22    0.32
   0 -11   2    1.14    0.42
   0  11  -2    2.13    0.58
   0  11  -2    1.48    0.34
   0  11   2    1.94    0.53
   0  11   2    1.50    0.49
   0  11   3    6.55    0.81
   0  11   3    5.22    0.76
   0 -11   4    4.24    0.68
   0  11  -4    4.15    0.78
   0  11   4    4.48    0.71
   0  11   4    3.96    0.73
   0 -11   5    7.20    0.87
   0  11  -5    8.24    1.04
   0  11   5    9.53    0.95
   0  11   5    8.03    1.01
   0 -11   6   31.46    1.69
   0  11  -6   34.73    1.85
   0  11   6   35.98    1.71
   0  11   6   33.93    1.88
   0 -11   7    7.82    1.00
   0  11  -7    9.18    1.13
   0  11   7    8.49    0.91
   0  11   7    7.62    1.05
   0 -11   8   18.31    1.45
   0  11  -8   19.02    1.49
   0  11   8   26.43    1.51
   0  11   8   15.56    1.44
   0 -11   9    4.79    0.93
   0  11  -9    7.62    1.10
   0  11   9    7.32    0.94
   0  11   9    6.33    1.12
   0 -11  10   11.32    1.32
   0  11 -10    9.29    1.20
   0  11  10   10.20    1.36
   0 -11  11    5.40    1.08
   0  11 -11    5.06    0.99
   0  11  11    5.30    1.15
   0 -11  12   14.42    1.57
   0  11 -12   17.47    1.57
   0  11  12   17.06    1.78
   0 -11  13    2.02    0.87
   0  11  13    2.08    0.97
   0 -11  14   10.27    1.52
   0  11  14   10.69    1.59
   0 -11  15    0.73    0.73
   0  11  15    0.43    0.74
   0 -11  16    2.06    1.00
   0  11  16    1.70    1.02
   0 -11  17    0.34    0.83
   0  11  17    0.07    0.79
   0 -11  18    0.55    0.84
   0  11  18    1.53    1.18
   0  12   0  101.16    2.98
   0  12   0  102.93    2.43
   0 -12   1    3.71    0.59
   0  12  -1    4.35    0.75
   0  12  -1    4.39    0.58
   0  12   1    4.76    0.77
   0  12   1    3.07    0.60
   0 -12   2   29.45    1.39
   0  12  -2   30.14    1.71
   0  12  -2   28.59    1.14
   0  12   2   30.45    1.65
   0  12   2   28.36    1.48
   0  12  -3    4.69    0.82
   0  12   3    4.06    0.72
   0 -12   4   58.20    2.11
   0  12  -4   72.96    2.66
   0  12   4   72.38    2.50
   0  12   4   64.21    2.39
   0 -12   5    4.14    0.74
   0  12  -5    5.77    0.94
   0  12   5    4.74    0.77
   0  12   5    4.51    0.85
   0 -12   6   25.91    1.59
   0  12  -6   32.54    1.88
   0  12   6   32.73    1.71
   0  12   6   29.11    1.78
   0 -12   7    8.50    1.03
   0  12  -7    9.12    1.19
   0  12   7    7.88    0.93
   0  12   7    8.29    1.14
   0 -12   8   24.42    1.70
   0  12  -8   26.81    1.79
   0  12   8   37.05    1.84
   0  12   8   23.94    1.77
   0 -12   9    1.33    0.68
   0  12  -9    1.16    0.65
   0  12   9    1.61    0.58
   0  12   9    0.89    0.71
   0 -12  10    5.31    1.06
   0  12 -10    5.93    1.08
   0  12  10    5.26    1.10
   0 -12  11   11.81    1.43
   0  12 -11   15.29    1.49
   0  12  11   11.68    1.51
   0 -12  12    4.98    1.11
   0  12 -12    8.00    1.24
   0  12  12    6.31    1.25
   0 -12  13    4.81    1.16
   0  12  13    3.35    1.14
   0 -12  14    0.08    0.63
   0  12  14    0.09    0.66
   0 -12  15    1.71    0.96
   0  12  15    4.29    1.30
   0 -12  16   -0.09    0.71
   0  12  16    0.21    0.91
   0 -12  17    1.72    1.03
   0  12  17    2.98    1.24
   0 -12  18    0.51    0.86
   0  12  18    0.49    1.00
   0  13   0    0.14    0.37
   0  13   0    0.04    0.31
   0  13  -1    1.74    0.60
   0  13  -1    1.50    0.44
   0  13   1    2.03    0.64
   0  13   1    2.43    0.57
   0 -13   2    1.75    0.53
   0  13  -2    1.12    0.54
   0  13   2    2.04    0.63
   0  13   2    2.17    0.59
   0 -13   4    5.34    0.79
   0  13  -4    5.87    0.96
   0  13   4    6.32    0.93
   0  13   4    5.20    0.87
   0 -13   5   10.20    1.07
   0  13  -5   11.52    1.24
   0  13   5   12.80    1.21
   0  13   5   11.97    1.25
   0 -13   6    1.46    0.60
   0  13  -6    2.11    0.72
   0  13   6    2.15    0.63
   0  13   6    2.78    0.81
   0 -13   7    5.38    0.93
   0  13  -7    5.32    1.00
   0  13   7    5.80    0.94
   0  13   7    4.90    1.00
   0 -13   8    3.91    0.88
   0  13  -8    3.76    0.89
   0  13   8    4.03    0.84
   0  13   8    2.81    0.86
   0 -13   9    5.22    1.02
   0  13  -9    4.93    1.00
   0  13   9    5.21    0.93
   0  13   9    5.28    1.09
   0 -13  10   -0.22    0.44
   0  13 -10    0.90    0.62
   0  13  10    0.00    0.69
   0 -13  11    4.38    1.05
   0  13 -11    6.44    1.15
   0  13  11    6.91    1.32
   0 -13  12    3.31    1.03
   0  13 -12    4.46    1.05
   0  13  12    3.89    1.15
   0 -13  13   -0.08    0.62
   0  13  13   -0.47    0.68
   0 -13  14    1.36    0.86
   0  13  14    1.59    0.90
   0 -13  15   -0.30    0.61
   0  13  15   -0.01    0.77
   0 -13  16    0.06    0.73
   0  13  16    1.05    1.02
   0 -13  17   -0.27    0.70
   0  13  17   -0.10    0.88
   0  14   0  173.08    4.25
   0  14   0  164.27    3.32
   0  14  -1    6.54    1.02
   0  14   1    6.56    0.99
   0  14   1    4.88    0.77
   0 -14   2   48.59    1.88
   0  14  -2   53.43    2.45
   0  14   2   50.83    2.32
   0  14   2   46.50    2.02
   0 -14   3    0.51    0.42
   0  14  -3    0.56    0.50
   0  14   3    0.38    0.48
   0  14   3    0.38    0.48
   0 -14   4   78.17    2.58
   0  14  -4   88.91    3.18
   0  14   4   91.73    3.09
   0  14   4   89.56    2.97
   0 -14   5    3.53    0.78
   0  14  -5    4.90    0.95
   0  14   5    5.06    0.91
   0  14   5    4.35    0.91
   0 -14   6   24.02    1.64
   0  14  -6   30.28    1.97
   0  14   6   30.75    1.86
   0  14   6   27.21    1.87
   0 -14   7    1.01    0.55
   0  14  -7    0.72    0.59
   0  14   7    0.68    0.54
   0  14   7    1.12    0.70
   0 -14   8   15.63    1.49
   0  14  -8   17.68    1.61
   0  14   8   24.26    1.69
   0  14   8   14.17    1.49
   0 -14   9   -0.25    0.47
   0  14  -9    0.18    0.55
   0  14   9   -0.08    0.47
   0  14   9   -0.05    0.56
   0 -14  10    6.14    1.15
   0  14 -10    6.52    1.18
   0  14  10    6.34    1.26
   0 -14  11    1.99    0.86
   0  14 -11    2.38    0.89
   0  14  11    2.09    0.95
   0 -14  12    2.41    0.95
   0  14 -12    2.75    0.96
   0  14  12    2.06    1.00
   0 -14  13    1.28    0.84
   0  14  13    1.34    0.85
   0 -14  14    0.83    0.76
   0  14  14   -0.15    0.77
   0 -14  15   -0.30    0.61
   0  14  15    0.01    0.75
   0 -14  16   -0.46    0.62
   0  14  16    0.32    0.88
   0 -14  17    0.48    0.89
   0  14  17    0.73    1.06
   0  15   0    0.24    0.44
   0  15  -1   -0.30    0.36
   0  15   1   -0.04    0.41
   0  15   1   -0.17    0.39
   0  15  -2    2.20    0.75
   0  15   2    2.07    0.71
   0  15   2    2.59    0.70
   0 -15   4    0.54    0.47
   0  15  -4    0.99    0.62
   0  15   4    0.99    0.58
   0  15   4    1.06    0.63
   0 -15   5    2.10    0.70
   0  15  -5    1.83    0.77
   0  15   5    1.87    0.69
   0  15   5    2.20    0.77
   0 -15   6    0.24    0.50
   0  15  -6    1.54    0.72
   0  15   6    0.63    0.54
   0  15   6    0.93    0.67
   0 -15   7    4.19    0.91
   0  15  -7    3.33    0.93
   0  15   7    3.09    0.80
   0  15   7    2.61    0.84
   0 -15   8   -0.06    0.49
   0  15  -8    0.00    0.51
   0  15   8    0.39    0.49
   0  15   8    0.26    0.60
   0 -15   9    2.85    0.89
   0  15  -9    4.12    1.02
   0  15   9    4.95    1.11
   0 -15  10    0.38    0.56
   0  15 -10    0.99    0.74
   0  15  10    1.44    0.81
   0 -15  11    2.54    0.92
   0  15 -11    4.02    1.04
   0  15  11    3.42    1.11
   0 -15  12   -0.24    0.59
   0  15 -12    0.33    0.66
   0  15  12   -0.12    0.71
   0 -15  13    0.53    0.73
   0  15  13    0.22    0.79
   0 -15  14   -0.38    0.59
   0  15  14    0.21    0.77
   0 -15  15    0.54    0.82
   0  15  15    0.13    0.77
   0 -15  16   -0.73    0.66
   0  15  16    0.29    0.90
   0  16   0  108.29    3.67
   0  16  -1    2.48    0.80
   0  16   1    3.28    0.84
   0  16  -2   68.03    2.97
   0  16   2   65.15    2.85
   0  16   2   61.37    2.46
   0  16  -3    0.67    0.60
   0  16   3    0.57    0.54
   0  16   3    0.90    0.55
   0  16  -4   57.03    2.78
   0  16   4   61.27    2.77
   0  16   4   57.36    2.59
   0 -16   5    2.26    0.73
   0  16  -5    3.57    0.93
   0  16   5    3.21    0.86
   0  16   5    2.22    0.79
   0 -16   6   20.50    1.61
   0  16  -6   24.50    1.93
   0  16   6   25.07    1.84
   0  16   6   23.06    1.83
   0 -16   7    0.11    0.51
   0  16  -7    0.14    0.56
   0  16   7    0.20    0.50
   0  16   7    0.33    0.63
   0 -16   8   12.78    1.46
   0  16  -8   14.18    1.56
   0  16   8   20.44    1.69
   0  16   8   13.14    1.57
   0 -16   9   -0.55    0.47
   0  16  -9    0.11    0.59
   0  16   9    0.35    0.65
   0 -16  10    3.09    1.01
   0  16 -10    4.11    1.07
   0  16  10    3.34    1.07
   0 -16  11    0.31    0.66
   0  16 -11    0.35    0.68
   0  16  11    0.51    0.79
   0 -16  12    0.67    0.75
   0  16 -12    2.46    0.96
   0  16  12    0.81    0.85
   0 -16  13    0.70    0.76
   0  16  13    0.75    0.81
   0 -16  14   -0.51    0.61
   0  16  14   -0.14    0.73
   0 -16  15    0.03    0.78
   0  16  15    0.20    0.85
   0 -16  16   -0.45    0.80
   0  17   0    0.32    0.50
   0  17  -1    0.68    0.57
   0  17   1    0.53    0.62
   0  17  -2    1.82    0.77
   0  17   2    3.37    0.92
   0  17  -4    0.64    0.62
   0  17   4    0.67    0.60
   0  17   4    0.64    0.60
   0  17  -5    0.76    0.70
   0  17   5    1.31    0.70
   0  17   5    1.19    0.75
   0 -17   6   -0.12    0.51
   0  17  -6    0.67    0.71
   0  17   6    0.37    0.57
   0  17   6   -0.44    0.49
   0 -17   7    0.32    0.61
   0  17  -7    0.96    0.74
   0  17   7    0.55    0.59
   0  17   7    0.99    0.73
   0 -17   8    3.31    0.98
   0  17  -8    4.79    1.16
   0  17   8    4.43    1.00
   0  17   8    3.55    1.06
   0 -17   9    0.27    0.65
   0  17  -9    0.86    0.74
   0  17   9    0.88    0.79
   0 -17  10    1.86    0.87
   0  17 -10    1.33    0.83
   0  17  10    1.46    0.88
   0 -17  11    0.71    0.74
   0  17 -11    1.56    0.85
   0  17  11    0.67    0.83
   0 -17  12    2.47    1.05
   0  17 -12    3.20    1.07
   0  17  12    2.49    1.14
   0 -17  13    0.42    0.84
   0  17  13    0.03    0.79
   0 -17  14    0.65    0.84
   0  17  14    1.60    1.14
   0 -17  15   -0.13    0.76
   0  17  15    0.11    0.91
   0  18   0   83.96    3.49
   0  18  -1    2.69    0.89
   0  18   1    1.34    0.72
   0  18  -2   57.87    2.96
   0  18   2   62.25    3.01
   0  18  -3    2.41    0.88
   0  18   3    2.23    0.81
   0  18  -4   51.16    2.85
   0  18   4   50.13    2.72
   0  18   4   53.12    2.61
   0  18  -5    1.00    0.72
   0  18   5    1.59    0.75
   0  18   5    1.39    0.79
   0  18  -6   23.21    2.02
   0  18   6   25.75    2.00
   0  18   6   22.54    1.92
   0  18  -7    0.35    0.61
   0  18   7    0.19    0.55
   0  18   7    0.14    0.64
   0 -18   8   13.36    1.58
   0  18  -8   18.31    1.89
   0  18   8   19.05    1.78
   0  18   8   16.50    1.79
   0 -18   9    0.19    0.70
   0  18  -9    0.94    0.79
   0  18   9    0.28    0.73
   0 -18  10    3.05    1.07
   0  18 -10    4.28    1.16
   0  18  10    4.54    1.26
   0 -18  11    3.52    1.10
   0  18 -11    2.68    1.06
   0  18  11    3.65    1.24
   0 -18  12    1.17    0.95
   0  18 -12    1.37    0.89
   0  18  12    1.71    1.08
   0 -18  13    1.65    1.04
   0  18  13    2.15    1.12
   0 -18  14   -0.45    0.74
   0  18  14    0.39    0.98
   0  19   0    0.40    0.57
   0  19  -1    0.03    0.55
   0  19   1   -0.02    0.53
   0  19  -2    1.30    0.77
   0  19   2    0.92    0.70
   0  19  -4    3.71    1.07
   0  19   4    3.95    1.06
   0  19  -5    0.24    0.68
   0  19   5    0.39    0.62
   0  19   5    0.53    0.68
   0  19  -6    2.08    0.94
   0  19   6    2.09    0.89
   0  19   6    2.80    0.95
   0  19  -7    0.56    0.75
   0  19   7    0.69    0.70
   0  19   7    1.16    0.83
   0  19  -8    7.31    1.42
   0  19   8    4.78    1.24
   0  19  -9    0.74    0.80
   0  19   9    0.27    0.76
   0 -19  10    6.06    1.35
   0  19 -10    6.92    1.43
   0  19  10    6.60    1.45
   0 -19  11   -0.44    0.67
   0  19 -11    0.10    0.73
   0  19  11    0.74    0.84
   0 -19  12    2.52    1.17
   0  19 -12    4.94    1.37
   0  19  12    3.06    1.28
   0 -19  13   -0.12    0.82
   0  19  13   -0.20    0.77
   0  20   0   14.72    1.71
   0  20  -1    2.06    0.93
   0  20   1    2.05    0.87
   0  20  -2   20.37    1.97
   0  20   2   20.05    1.92
   0  20  -3    1.68    0.86
   0  20   3    1.08    0.74
   0  20  -4   11.14    1.63
   0  20   4   12.75    1.68
   0  20  -5    1.09    0.83
   0  20   5    0.13    0.61
   0  20  -6    3.96    1.16
   0  20   6    5.63    1.26
   0  20   6    5.64    1.21
   0  20  -7    1.69    0.94
   0  20   7    1.55    0.89
   0  20   7    0.86    0.83
   0  20  -8    5.55    1.34
   0  20   8    3.64    1.17
   0  20  -9    1.23    0.92
   0  20   9    2.07    1.09
   0  20 -10    1.17    0.94
   0  20  10    0.44    0.88
   0  20 -11    3.82    1.28
   0  20  11    3.71    1.35
   0 -20  12   -0.47    0.82
   0  20  12    0.51    0.92
   0  21   0   -0.01    0.65
   0  21  -1    0.37    0.69
   0  21   1   -0.26    0.58
   0  21  -2    1.58    0.86
   0  21   2    0.80    0.80
   0  21  -3    0.40    0.71
   0  21   3   -0.16    0.59
   0  21  -4    5.51    1.31
   0  21   4    3.94    1.14
   0  21  -5   -0.16    0.63
   0  21   5   -0.06    0.66
   0  21  -6    5.51    1.37
   0  21   6    5.43    1.28
   0  21  -7    1.45    0.96
   0  21   7    1.50    0.91
   0  21   7    0.97    0.87
   0  21  -8    7.96    1.58
   0  21   8    8.61    1.56
   0  21  -9    0.95    0.88
   0  21   9    0.38    0.81
   0  21  10   10.50    1.79
   0  22   0    2.26    1.03
   0  22  -1    0.57    0.79
   0  22   1    0.27    0.82
   0  22  -2    2.79    1.12
   0  22   2    3.94    1.23
   0  22  -3    1.81    0.92
   0  22   3    0.44    0.73
   0  22  -4    1.14    0.90
   0  22   4    2.26    1.00
   0  22  -5    0.29    0.74
   0  22   5    0.16    0.70
   0  22  -6    0.81    0.87
   0  22   6    0.98    0.81
   0  22   7    1.31    0.93
   0  22   8    1.17    0.96
   0  22   9    1.68    1.10
   0  23   0   -0.29    0.67
   0  23  -1    0.05    0.73
   0  23   1   -0.03    0.73
   0  23  -2    1.77    1.05
   0  23   2    2.14    1.07
   0  23   3    0.37    0.81
   0  23   4    5.65    1.38
   0  23   5    0.96    0.92
   0  23   6    6.37    1.49
  -1   0  21   -0.23    0.84
  -1   0  20    0.65    0.84
  -1   0  19   -0.19    0.61
  -1   0  18    0.75    0.75
  -1   0  17   -0.14    0.54
  -1   0  16    7.93    1.28
  -1   0  15    0.12    0.58
  -1   0  15   -0.36    0.51
  -1   0  14   10.53    1.26
  -1   0  14   10.42    1.23
  -1   0  13   -0.15    0.47
  -1   0  13   -0.14    0.35
  -1   0  12   31.48    1.78
  -1   0  12   30.45    1.78
  -1   0  11    0.25    0.46
  -1   0  11    0.07    0.38
  -1   0  10   38.43    1.71
  -1   0  10   38.89    1.80
   1   0 -10   58.85    1.45
  -1   0   9    0.14    0.35
  -1   0   9    0.16    0.28
   1   0  -9    0.13    0.28
  -1   0   8   82.35    2.15
  -1   0   8   84.78    2.31
   1   0  -8   87.46    1.51
  -1   0   7    0.77    0.36
  -1   0   7    0.02    0.22
   1   0  -7   -0.22    0.23
  -1   0   6   99.16    2.02
  -1   0   6   97.54    2.13
   1   0  -6   99.74    1.36
  -1   0   5   -0.03    0.22
  -1   0   5   -0.02    0.14
   1   0  -5    0.25    0.17
  -1   0   4   92.71    1.62
   1   0  -4   95.84    1.14
  -1   0   0    7.42    0.26
  -1   0  -1    0.06    0.06
  -1   0  -2    0.49    0.13
  -1   0  -3    0.04    0.14
   1   0   4   32.67    0.99
   1   0   4   34.68    1.05
  -1   0  -5    0.07    0.21
   1   0   5    0.09    0.24
   1   0   5   -0.07    0.15
  -1   0  -6    0.60    0.30
   1   0   6    0.22    0.30
   1   0   6    0.71    0.31
  -1   0  -7   -0.03    0.22
   1   0   7   -0.02    0.28
   1   0   7   -0.14    0.20
  -1   0  -8    1.10    0.39
   1   0   8    1.50    0.46
   1   0   8    1.43    0.44
  -1   0  -9    0.13    0.33
   1   0   9   -0.13    0.32
   1   0   9    0.22    0.27
  -1   0 -10    8.25    0.89
   1   0  10    7.90    0.89
   1   0  10    7.71    0.87
  -1   0 -11   -0.26    0.41
   1   0  11    0.06    0.45
   1   0  11   -0.12    0.36
   1   0  12   20.90    1.41
   1   0  12   19.01    1.44
   1   0  13    0.31    0.52
   1   0  13    0.29    0.44
   1   0  14   14.87    1.37
   1   0  14   11.50    1.30
   1   0  15   -0.12    0.52
   1   0  16   22.25    1.89
   1   0  17   -0.21    0.60
   1   0  18    9.44    1.50
   1   0  19    0.26    0.79
   1   0  20    7.78    1.60
  -1  -1  21   -0.07    0.84
  -1  -1  20   -0.03    0.74
  -1   1  20    0.14    0.76
  -1  -1  19    0.67    0.80
  -1   1  19    0.91    0.84
  -1  -1  18    0.54    0.71
  -1   1  18    0.28    0.69
  -1  -1  17    1.93    0.87
  -1   1  17    2.09    0.85
  -1  -1  16   -0.25    0.55
  -1   1  16    0.15    0.67
  -1   1  16   -0.30    0.52
  -1  -1  15   29.33    2.07
  -1   1  15   29.95    1.98
  -1   1  15   31.80    2.07
  -1  -1  14   -0.35    0.54
  -1  -1  14    0.46    0.52
  -1   1  14   -0.16    0.52
  -1   1  14    0.32    0.51
  -1  -1  13   23.20    1.52
  -1  -1  13   22.19    1.64
  -1   1  13   22.90    1.60
  -1   1  13   22.96    1.62
  -1  -1  12    1.63    0.61
  -1  -1  12    0.66    0.51
  -1   1  12    0.43    0.54
  -1   1  12    0.72    0.48
  -1  -1  11  142.45    3.19
  -1  -1  11  146.89    3.65
  -1   1  11  144.71    3.43
  -1   1  11  152.32    3.60
  -1  -1  10    0.31    0.42
  -1  -1  10   -0.23    0.29
  -1   1  10    0.32    0.46
  -1   1  10    0.13    0.33
   1   1 -10    0.15    0.32
  -1  -1   9  125.28    2.67
  -1  -1   9  128.60    3.06
  -1   1   9  128.65    2.91
  -1   1   9  134.24    3.01
   1  -1  -9  130.87    1.91
   1   1  -9  142.00    2.15
  -1  -1   8    7.26    0.77
  -1  -1   8    7.21    0.76
  -1   1   8    8.29    0.86
  -1   1   8    6.71    0.72
   1  -1  -8    7.81    0.58
   1   1  -8    7.29    0.61
  -1  -1   7  770.67    5.78
  -1  -1   7  788.37    6.66
  -1   1   7  762.00    6.23
  -1   1   7  775.73    6.33
   1  -1  -7  784.22    4.61
   1   1  -7  836.33    4.97
  -1  -1   6    0.20    0.25
  -1  -1   6    0.19    0.22
  -1   1   6    0.44    0.30
  -1   1   6    0.31    0.26
   1  -1  -6    0.52    0.19
   1   1  -6   -0.02    0.21
  -1  -1   5  395.31    3.48
  -1  -1   5  405.69    4.07
  -1   1   5  401.90    3.90
   1  -1  -5  381.72    2.90
   1   1  -5  436.45    3.13
  -1  -1   4    7.40    0.54
  -1   1   4    7.49    0.56
   1   1  -4    8.29    0.43
  -1   1   3  357.94    3.05
   1   1  -3  415.77    3.11
   1   1  -2    0.06    0.06
  -1   1   1  264.14    2.64
   1   1  -1  269.57    2.32
  -1   1   0    0.41    0.10
   1   1   0    0.25    0.08
  -1  -1  -1  257.40    2.18
  -1  -1  -1  246.95    2.13
  -1   1  -1  226.18    2.02
  -1  -1  -2    1.52    0.20
  -1   1  -2    1.29    0.21
  -1  -1  -3    7.48    0.44
  -1   1  -3    6.87    0.50
   1  -1   3    7.17    0.48
   1   1   3    7.29    0.50
   1  -1   4    2.52    0.37
   1   1   4    2.69    0.40
   1   1   4    3.35    0.37
  -1  -1  -5    6.99    0.53
  -1   1  -5    6.10    0.59
   1  -1   5    7.21    0.54
   1  -1   5    7.57    0.62
   1   1   5    6.84    0.58
   1   1   5    7.20    0.55
  -1  -1  -6    1.87    0.36
  -1   1  -6    1.61    0.38
   1  -1   6    2.19    0.38
   1  -1   6    1.67    0.39
   1   1   6    1.80    0.42
   1   1   6    1.91    0.38
  -1  -1  -7    2.77    0.45
  -1   1  -7    2.53    0.47
   1  -1   7    1.20    0.34
   1  -1   7    1.01    0.35
   1   1   7    1.58    0.42
   1   1   7    1.50    0.38
  -1  -1  -8    5.69    0.65
  -1   1  -8    5.86    0.66
   1  -1   8    5.61    0.67
   1  -1   8    5.19    0.69
   1   1   8    5.94    0.73
   1   1   8    6.43    0.70
  -1  -1  -9   19.03    1.05
  -1   1  -9   20.80    1.14
   1  -1   9   20.74    1.13
   1  -1   9   20.65    1.27
   1   1   9   21.02    1.25
   1   1   9   19.53    1.19
  -1  -1 -10    0.52    0.40
  -1   1 -10    0.81    0.46
   1  -1  10    0.82    0.44
   1  -1  10    0.10    0.36
   1   1  10    0.57    0.47
   1   1  10    0.35    0.37
  -1  -1 -11   11.38    1.00
  -1   1 -11   11.22    1.06
   1  -1  11   13.36    1.10
   1  -1  11   10.75    1.10
   1   1  11   12.58    1.14
   1   1  11   10.75    1.06
   1  -1  12    1.26    0.55
   1  -1  12    0.70    0.52
   1   1  12    1.11    0.59
   1   1  12    1.11    0.54
   1  -1  13   11.19    1.10
   1  -1  13    8.25    1.14
   1   1  13   11.72    1.23
   1   1  13    9.54    1.13
   1  -1  14    0.48    0.56
   1   1  14    0.27    0.55
   1   1  14    0.17    0.52
   1  -1  15    8.78    1.30
   1   1  15    8.54    1.20
   1   1  15    8.19    1.21
   1  -1  16    1.00    0.73
   1   1  16    0.04    0.62
   1  -1  17    1.86    0.89
   1   1  17    1.63    0.82
   1  -1  18    0.09    0.72
   1   1  18    0.26    0.72
   1  -1  19    0.74    0.85
   1  -1  20    0.20    0.86
  -1  -2  21    0.21    0.93
  -1  -2  20    0.27    0.83
  -1  -2  19    0.90    0.88
  -1   2  19    0.85    0.78
  -1  -2  18    0.12    0.66
  -1   2  18    1.38    0.82
  -1  -2  17   -0.25    0.52
  -1   2  17    0.34    0.70
  -1   2  17    0.65    0.64
  -1  -2  16    3.68    1.01
  -1   2  16    4.89    1.11
  -1   2  16    4.84    1.06
  -1  -2  15    0.14    0.56
  -1   2  15    0.08    0.65
  -1   2  15    0.14    0.50
  -1  -2  14   11.72    1.35
  -1   2  14   13.08    1.42
  -1   2  14   12.63    1.33
  -1  -2  13    0.90    0.55
  -1  -2  13    0.59    0.50
  -1   2  13    0.21    0.50
  -1   2  13    1.22    0.58
  -1  -2  12   17.30    1.30
  -1  -2  12   17.60    1.43
  -1   2  12   18.29    1.47
  -1   2  12   19.41    1.42
  -1  -2  11   15.33    1.16
  -1  -2  11   13.92    1.23
  -1   2  11   15.96    1.33
  -1   2  11   15.87    1.22
  -1  -2  10   20.00    1.22
  -1  -2  10   20.93    1.39
  -1   2  10   22.16    1.43
  -1   2  10   22.66    1.35
   1   2 -10   36.01    1.28
  -1  -2   9   48.19    1.64
  -1  -2   9   50.68    1.98
  -1   2   9   48.71    1.88
  -1   2   9   49.41    1.82
   1  -2  -9   50.92    1.22
   1   2  -9   56.36    1.48
  -1  -2   8   27.23    1.19
  -1  -2   8   26.79    1.38
  -1   2   8   26.79    1.38
  -1   2   8   27.08    1.28
   1  -2  -8   28.25    0.86
   1   2  -8   29.74    1.06
  -1  -2   7   47.78    1.39
  -1  -2   7   56.36    1.84
  -1   2   7   56.31    1.80
  -1   2   7   56.18    1.68
   1  -2  -7   57.21    1.10
   1   2  -7   60.18    1.37
  -1  -2   6   22.33    0.89
  -1  -2   6   25.31    1.16
  -1   2   6   24.46    1.17
   1  -2  -6   26.94    0.71
   1   2  -6   27.15    0.89
  -1  -2   5  330.92    3.01
  -1  -2   5  341.73    3.84
  -1   2   5  367.32    3.91
   1  -2  -5  372.69    2.78
   1   2  -5  414.67    3.26
  -1  -2   4    2.10    0.33
  -1   2   4    6.73    0.32
  -1   2   4    2.33    0.38
   1   2  -4    2.39    0.31
  -1  -2   3  161.67    2.14
  -1   2   3  190.99    1.77
  -1   2   3  166.64    2.20
   1   2  -3  160.32    1.77
  -1   2   2    1.37    0.16
   1   2  -2    1.06    0.19
  -1   2   1    1.62    0.18
   1   2  -1    1.49    0.19
  -1   2   0    6.62    0.35
   1   2   0    6.89    0.35
  -1   2  -1  315.79    2.63
   1   2   1  349.03    2.76
  -1   2  -2    4.21    0.41
   1  -2   2    4.36    0.36
   1   2   2    4.66    0.35
   1   2   2    5.08    0.41
  -1  -2  -3   18.42    0.67
  -1  -2  -3   19.22    0.68
  -1   2  -3   17.99    0.77
   1  -2   3   20.35    0.81
   1   2   3   20.39    0.82
  -1   2  -4    1.35    0.34
   1  -2   4    1.14    0.29
   1   2   4    0.97    0.32
   1   2   4    1.09    0.23
  -1  -2  -5    3.45    0.40
  -1   2  -5    4.42    0.53
   1  -2   5    4.14    0.51
   1   2   5    4.04    0.50
   1   2   5    4.77    0.44
  -1  -2  -6   -0.10    0.16
  -1   2  -6    0.07    0.27
   1  -2   6    0.11    0.21
   1  -2   6    0.01    0.20
   1   2   6   -0.03    0.26
   1   2   6    0.03    0.17
  -1  -2  -7    8.62    0.67
  -1   2  -7    9.16    0.80
   1  -2   7    8.96    0.64
   1  -2   7    9.60    0.82
   1   2   7    9.37    0.83
   1   2   7    9.47    0.72
  -1  -2  -8    0.07    0.28
  -1   2  -8    0.37    0.37
   1  -2   8    0.04    0.30
   1  -2   8    0.13    0.28
   1   2   8    0.30    0.39
   1   2   8    0.26    0.29
  -1  -2  -9    1.48    0.43
  -1   2  -9    1.62    0.50
   1  -2   9    1.82    0.46
   1  -2   9    1.77    0.52
   1   2   9    1.39    0.52
   1   2   9    1.86    0.48
  -1  -2 -10   13.26    0.98
  -1   2 -10   12.47    1.03
   1  -2  10    8.90    0.85
   1  -2  10    9.30    0.99
   1   2  10    8.87    0.99
   1   2  10    9.90    0.95
  -1  -2 -11    4.04    0.69
  -1   2 -11    3.16    0.70
   1  -2  11    3.81    0.66
   1  -2  11    3.24    0.73
   1   2  11    3.48    0.75
   1   2  11    3.38    0.69
   1  -2  12    8.05    0.92
   1  -2  12    8.68    1.08
   1   2  12    9.19    1.10
   1   2  12    8.48    1.00
   1  -2  13    0.10    0.46
   1   2  13   -0.12    0.47
   1   2  13   -0.19    0.37
   1  -2  14   14.15    1.46
   1   2  14   17.48    1.53
   1   2  14   16.14    1.48
   1  -2  15    1.74    0.83
   1   2  15    1.59    0.86
   1   2  15    1.14    0.71
   1  -2  16    8.88    1.39
   1   2  16   10.63    1.43
   1   2  16   10.11    1.38
   1  -2  17   -0.05    0.63
   1   2  17   -0.61    0.57
   1  -2  18    8.96    1.52
   1  -2  19    0.45    0.80
   1  -2  20    3.91    1.36
  -1  -3  21    0.08    0.93
  -1  -3  20    2.36    1.17
  -1  -3  19   -0.25    0.66
  -1  -3  18    2.13    0.90
  -1   3  18    2.13    1.02
  -1  -3  17    0.58    0.63
  -1   3  17    0.19    0.74
  -1   3  17   -0.11    0.56
  -1  -3  16    2.50    0.88
  -1   3  16    4.69    1.14
  -1   3  16    3.62    0.96
  -1  -3  15    3.42    0.95
  -1   3  15    4.95    1.12
  -1   3  15    5.60    1.04
  -1  -3  14    3.09    0.88
  -1   3  14    2.56    0.85
  -1   3  14    2.60    0.76
  -1  -3  13    1.70    0.65
  -1   3  13    3.18    0.86
  -1   3  13    2.65    0.71
  -1  -3  12   -0.53    0.39
  -1  -3  12    0.14    0.40
  -1   3  12   -0.22    0.55
  -1   3  12   -0.13    0.32
  -1  -3  11   14.85    1.10
  -1  -3  11   18.57    1.40
  -1   3  11   18.80    1.44
  -1   3  11   17.40    1.24
  -1  -3  10    0.71    0.48
  -1  -3  10    1.07    0.49
  -1   3  10    1.31    0.61
  -1   3  10    1.29    0.48
  -1  -3   9   22.01    1.12
  -1  -3   9   22.70    1.38
  -1   3   9   25.16    1.47
  -1   3   9   24.64    1.28
   1  -3  -9   22.92    0.87
   1   3  -9   26.68    1.12
  -1  -3   8    2.99    0.47
  -1  -3   8    2.06    0.52
  -1   3   8    2.63    0.60
  -1   3   8    2.75    0.50
   1  -3  -8    3.37    0.40
   1   3  -8    2.80    0.48
  -1  -3   7   74.97    1.63
  -1  -3   7   80.81    2.23
  -1   3   7   75.35    2.13
  -1   3   7   84.38    2.00
   1  -3  -7   85.53    1.41
   1   3  -7   89.45    1.79
  -1  -3   6    3.62    0.42
  -1  -3   6    3.51    0.52
  -1   3   6    4.72    0.62
   1  -3  -6    4.19    0.36
   1  -3  -6    4.39    0.35
   1   3  -6    4.82    0.52
  -1  -3   5  191.42    2.96
  -1   3   5  246.26    2.28
  -1   3   5  214.76    3.14
   1   3  -5  222.36    2.57
  -1  -3   4    5.07    0.49
  -1   3   4    6.58    0.38
  -1   3   4    5.91    0.62
   1   3  -4    5.28    0.49
  -1  -3   3   13.64    0.67
  -1   3   3   17.03    0.57
  -1   3   3   13.62    0.73
   1   3  -3   15.40    0.66
  -1   3   2    4.31    0.34
  -1   3   2    4.38    0.41
   1   3  -2    4.43    0.39
  -1   3   1  207.65    2.10
   1   3  -1  212.00    2.24
  -1   3   0    0.68    0.19
   1   3   0    0.71    0.19
  -1   3  -1  297.04    2.78
   1   3   1  311.57    2.81
  -1   3  -2   -0.15    0.19
   1  -3   2    0.11    0.16
   1   3   2    0.03    0.13
   1   3   2   -0.08    0.17
  -1   3  -3    0.05    0.24
   1  -3   3    0.28    0.19
   1   3   3    0.40    0.19
   1   3   3    0.18    0.24
  -1   3  -4   10.43    0.73
   1  -3   4    7.77    0.63
   1   3   4    7.55    0.67
  -1  -3  -5   17.80    0.79
  -1   3  -5   15.83    0.88
   1  -3   5   18.27    0.97
   1   3   5   16.15    0.92
   1   3   5   18.47    0.75
  -1  -3  -6    3.35    0.43
  -1   3  -6    2.16    0.47
   1  -3   6    2.51    0.34
   1  -3   6    2.78    0.49
   1   3   6    3.00    0.52
   1   3   6    2.90    0.39
  -1  -3  -7    7.09    0.62
  -1   3  -7    6.50    0.74
   1  -3   7    6.71    0.55
   1  -3   7    7.85    0.77
   1   3   7    7.39    0.80
   1   3   7    7.42    0.64
  -1  -3  -8   27.44    1.15
  -1   3  -8   24.23    1.23
   1  -3   8   26.86    1.06
   1  -3   8   23.56    1.35
   1   3   8   24.55    1.34
   1   3   8   26.82    1.23
  -1  -3  -9    0.55    0.37
  -1   3  -9    0.37    0.42
   1  -3   9    0.49    0.34
   1  -3   9    0.87    0.45
   1   3   9    0.66    0.43
   1   3   9    0.81    0.38
  -1  -3 -10    9.48    0.85
  -1   3 -10    9.13    0.96
   1  -3  10    6.94    0.77
   1  -3  10    6.49    0.90
   1   3  10    6.64    0.92
   1   3  10    6.45    0.80
  -1   3 -11   12.98    1.12
   1  -3  11   13.68    1.03
   1  -3  11   11.70    1.18
   1   3  11   12.39    1.19
   1   3  11   14.16    1.14
   1  -3  12    6.04    0.99
   1   3  12    6.02    0.98
   1   3  12    6.87    0.92
   1  -3  13    0.04    0.52
   1   3  13    0.51    0.57
   1   3  13    0.09    0.47
   1  -3  14    6.90    1.18
   1   3  14    7.76    1.18
   1   3  14    8.98    1.18
   1  -3  15    4.81    1.10
   1   3  15    4.69    1.08
   1   3  15    4.61    0.99
   1  -3  16    3.09    1.02
   1   3  16    3.24    1.01
   1   3  16    1.55    0.78
   1  -3  17    0.08    0.65
   1   3  17    0.27    0.77
   1  -3  18    0.67    0.80
   1  -3  19    0.02    0.75
   1  -3  20   -0.01    0.82
  -1  -4  20    0.47    0.88
  -1  -4  19    1.70    1.03
  -1   4  19    2.39    1.16
  -1  -4  18    1.74    0.96
  -1   4  18    1.22    0.92
  -1  -4  17    4.19    1.12
  -1   4  17    4.66    1.20
  -1  -4  16    3.69    1.05
  -1   4  16    3.71    1.11
  -1   4  16    2.79    0.85
  -1  -4  15    5.70    1.15
  -1   4  15    6.54    1.25
  -1   4  15    6.87    1.10
  -1  -4  14   15.66    1.57
  -1   4  14   14.86    1.53
  -1   4  14   16.74    1.46
  -1  -4  13   18.77    1.59
  -1   4  13   20.75    1.69
  -1   4  13   21.07    1.51
  -1  -4  12    8.29    1.11
  -1   4  12    7.76    1.11
  -1   4  12    8.32    0.96
  -1  -4  11    1.33    0.50
  -1  -4  11    1.54    0.57
  -1   4  11    1.74    0.68
  -1   4  11    1.15    0.44
  -1  -4  10   14.13    0.99
  -1  -4  10   17.64    1.32
  -1   4  10   15.28    1.33
  -1   4  10   16.48    1.14
   1   4 -10   28.45    1.31
  -1  -4   9   51.57    1.54
  -1  -4   9   57.34    2.18
  -1   4   9   59.43    2.22
  -1   4   9   56.44    1.87
   1  -4  -9   58.68    1.39
   1   4  -9   60.76    1.74
  -1  -4   8   15.44    0.85
  -1  -4   8   19.00    1.24
  -1   4   8   17.87    1.23
  -1   4   8   20.56    1.09
   1  -4  -8   23.74    0.88
   1   4  -8   21.96    1.08
  -1  -4   7   10.11    0.64
  -1  -4   7   13.60    0.97
  -1   4   7   12.43    0.99
   1  -4  -7   13.21    0.65
   1  -4  -7   14.13    0.66
   1   4  -7   13.41    0.84
  -1  -4   6    3.93    0.42
  -1  -4   6    3.59    0.54
  -1   4   6    4.88    0.42
  -1   4   6    4.04    0.59
   1   4  -6    5.14    0.55
  -1  -4   5   14.28    0.86
  -1   4   5   15.17    0.64
  -1   4   5   10.58    0.80
   1   4  -5   13.18    0.74
  -1  -4   4    7.81    0.61
  -1   4   4   17.43    0.68
  -1   4   4    5.04    0.59
   1   4  -4    6.53    0.55
  -1  -4   3   14.37    0.72
  -1   4   3   16.41    0.67
  -1   4   3   13.85    0.78
   1   4  -3   16.45    0.76
  -1  -4   2    2.34    0.29
  -1   4   2    2.41    0.33
  -1   4   2    1.95    0.36
   1   4  -2    2.68    0.37
  -1   4   1   11.22    0.60
  -1   4   1   10.47    0.57
   1   4  -1   12.29    0.64
  -1   4   0    0.04    0.18
   1   4   0    0.15    0.17
  -1   4  -1  168.33    2.30
   1  -4   1  163.95    2.09
   1   4   1  172.55    2.28
   1   4   1  155.88    2.09
  -1   4  -2    0.27    0.27
   1  -4   2    0.36    0.23
   1   4   2    0.28    0.18
   1   4   2    0.34    0.25
  -1   4  -3   60.41    1.52
   1  -4   3   62.65    1.56
   1   4   3   65.87    1.47
   1   4   3   62.56    1.60
  -1   4  -4    0.12    0.28
   1  -4   4    0.80    0.28
   1   4   4    0.78    0.35
  -1  -4  -5   73.80    1.66
  -1  -4  -5   69.18    1.61
  -1   4  -5   63.99    1.71
   1  -4   5   61.46    1.79
   1   4   5   62.59    1.82
   1   4   5   72.09    1.37
  -1  -4  -6    0.20    0.24
  -1  -4  -6   -0.01    0.17
  -1   4  -6    0.02    0.28
   1  -4   6    0.24    0.28
   1   4   6    0.07    0.27
   1   4   6    0.11    0.17
  -1  -4  -7  162.18    2.63
  -1   4  -7  147.81    2.78
   1  -4   7  143.37    1.95
   1  -4   7  149.25    3.17
   1   4   7  152.57    3.17
   1   4   7  158.40    2.55
  -1  -4  -8    2.89    0.50
  -1   4  -8    2.24    0.57
   1  -4   8    2.53    0.40
   1  -4   8    2.21    0.55
   1   4   8    1.93    0.54
   1   4   8    1.99    0.44
  -1  -4  -9   31.39    1.30
  -1   4  -9   31.37    1.48
   1  -4   9   31.65    1.17
   1  -4   9   29.66    1.63
   1   4   9   30.75    1.62
   1   4   9   32.93    1.41
  -1  -4 -10    1.34    0.47
  -1   4 -10    0.96    0.52
   1  -4  10    0.77    0.40
   1  -4  10    1.23    0.53
   1   4  10    1.39    0.60
   1   4  10    0.67    0.39
  -1   4 -11   22.91    1.40
   1  -4  11   22.25    1.58
   1   4  11   25.35    1.66
   1   4  11   24.06    1.40
   1  -4  12    1.94    0.70
   1   4  12    2.36    0.75
   1   4  12    1.66    0.58
   1  -4  13    3.76    0.91
   1   4  13    4.58    0.97
   1   4  13    5.63    0.93
   1  -4  14    4.81    1.07
   1   4  14    4.64    1.06
   1   4  14    4.01    0.91
   1  -4  15    6.61    1.23
   1   4  15    6.27    1.19
   1  -4  16    2.57    0.94
   1   4  16    3.48    1.06
   1  -4  17    0.98    0.80
   1   4  17    0.79    0.83
   1  -4  18    4.08    1.24
   1   4  18    5.90    1.32
   1  -4  19    0.26    0.80
   1  -4  20    1.71    1.18
  -1  -5  20    6.10    1.53
  -1   5  20    6.37    1.57
  -1  -5  19    0.34    0.82
  -1   5  19    1.39    1.04
  -1  -5  18    5.43    1.30
  -1   5  18    5.55    1.35
  -1  -5  17    1.53    0.80
  -1   5  17    2.96    1.09
  -1  -5  16    9.41    1.46
  -1   5  16   10.01    1.48
  -1  -5  15    5.26    1.13
  -1   5  15    6.45    1.25
  -1  -5  14   11.06    1.36
  -1   5  14   10.11    1.41
  -1   5  14   11.46    1.23
  -1  -5  13   11.72    1.34
  -1   5  13   12.08    1.43
  -1   5  13   11.73    1.17
  -1  -5  12    3.44    0.83
  -1   5  12    3.24    0.83
  -1   5  12    3.65    0.71
  -1  -5  11   15.94    1.35
  -1   5  11   14.70    1.33
  -1   5  11   16.80    1.18
   1   5 -11   19.58    1.20
  -1  -5  10    0.44    0.42
  -1   5  10   -0.04    0.48
  -1   5  10   -0.14    0.28
  -1  -5   9    6.98    0.65
  -1  -5   9    6.90    0.84
  -1   5   9    7.30    0.93
  -1   5   9    8.58    0.78
   1  -5  -9    8.50    0.65
   1   5  -9    8.92    0.82
  -1  -5   8   -0.03    0.24
  -1  -5   8    0.05    0.28
  -1   5   8   -0.07    0.39
  -1   5   8   -0.01    0.24
   1  -5  -8    0.06    0.22
   1  -5  -8    0.16    0.22
   1   5  -8    0.26    0.33
  -1  -5   7   48.97    1.18
  -1  -5   7   51.97    1.89
  -1   5   7   65.85    1.49
  -1   5   7   55.68    2.01
   1   5  -7   54.95    1.65
  -1  -5   6    0.67    0.33
  -1   5   6    0.93    0.26
  -1   5   6    0.63    0.38
   1   5  -6    0.44    0.31
  -1  -5   5    8.66    0.70
  -1   5   5   10.78    0.62
  -1   5   5    7.06    0.72
   1   5  -5    8.71    0.68
  -1  -5   4    0.27    0.20
  -1   5   4    0.41    0.21
  -1   5   4    0.33    0.30
   1   5  -4    0.26    0.25
  -1  -5   3    0.90    0.25
  -1   5   3    1.06    0.27
  -1   5   3    1.13    0.37
   1   5  -3    1.35    0.33
  -1  -5   2    2.10    0.30
  -1   5   2    2.73    0.38
  -1   5   2    2.38    0.41
   1   5  -2    2.69    0.41
  -1   5   1    6.77    0.55
  -1   5   1    6.43    0.55
   1   5  -1    6.57    0.55
  -1   5   0    5.63    0.52
   1   5   0    5.95    0.52
   1   5   0    5.29    0.45
  -1   5  -1    4.70    0.54
   1  -5   1    4.41    0.47
   1   5   1    4.53    0.46
   1   5   1    4.60    0.48
  -1   5  -2   16.50    0.89
   1  -5   2   13.80    0.75
   1   5   2   15.95    0.80
   1   5   2   15.35    0.83
  -1   5  -3   15.94    0.91
   1  -5   3   16.81    0.88
   1   5   3   17.38    0.84
   1   5   3   15.98    0.90
  -1   5  -4   15.42    0.93
   1   5   4   37.03    1.23
   1   5   4   12.97    0.87
  -1   5  -5    2.99    0.53
   1  -5   5    2.05    0.43
   1   5   5    3.41    0.47
   1   5   5    2.90    0.53
  -1  -5  -6   10.26    0.74
  -1  -5  -6   10.88    0.74
  -1   5  -6    9.24    0.83
   1  -5   6    9.36    0.84
   1   5   6   10.59    0.93
   1   5   6    8.53    0.56
  -1  -5  -7    4.69    0.57
  -1  -5  -7    4.67    0.57
  -1   5  -7    4.78    0.71
   1  -5   7    3.86    0.65
   1   5   7    3.75    0.65
   1   5   7    4.90    0.52
  -1  -5  -8   37.74    1.41
  -1   5  -8   32.34    1.50
   1  -5   8   34.98    1.02
   1  -5   8   32.52    1.65
   1   5   8   34.50    1.71
   1   5   8   36.83    1.34
  -1  -5  -9   14.58    0.97
  -1   5  -9   13.41    1.10
   1  -5   9   14.63    1.21
   1   5   9   13.17    1.16
   1   5   9   15.10    0.98
  -1  -5 -10   42.41    1.61
  -1   5 -10   42.92    1.83
   1  -5  10   23.53    1.58
   1   5  10   28.83    1.75
   1   5  10   25.62    1.33
  -1   5 -11    0.49    0.52
   1  -5  11    0.49    0.49
   1   5  11    0.22    0.54
   1   5  11    0.16    0.36
  -1   5 -12    3.97    0.84
   1  -5  12    4.24    0.92
   1   5  12    5.46    0.99
   1   5  12    4.31    0.77
   1  -5  13   -0.28    0.45
   1   5  13   -0.33    0.58
   1  -5  14   17.49    1.68
   1   5  14   21.80    1.87
   1  -5  15    0.99    0.70
   1   5  15    1.35    0.83
   1  -5  16    1.78    0.88
   1   5  16    1.38    0.91
   1  -5  17   -0.13    0.64
   1   5  17   -0.14    0.74
   1  -5  18    0.75    0.82
   1   5  18    1.41    0.94
   1  -5  19    0.25    0.82
   1   5  19    0.97    0.93
   1  -5  20   -0.37    0.87
  -1  -6  20    0.13    0.90
  -1   6  20    0.07    0.99
  -1  -6  19    1.31    0.93
  -1   6  19    1.50    1.04
  -1  -6  18    0.13    0.67
  -1   6  18   -0.10    0.76
  -1  -6  17    1.79    0.91
  -1   6  17    2.52    1.10
  -1  -6  16    0.17    0.59
  -1   6  16    0.18    0.73
  -1  -6  15   11.44    1.52
  -1   6  15   12.04    1.56
  -1  -6  14    1.21    0.74
  -1   6  14    1.64    0.86
  -1  -6  13    3.56    0.93
  -1   6  13    3.70    1.02
  -1   6  13    3.94    0.79
  -1  -6  12    0.10    0.40
  -1   6  12   -0.15    0.45
  -1   6  12    0.08    0.34
  -1  -6  11   11.89    1.22
  -1   6  11   10.24    1.19
  -1   6  11   11.37    0.98
   1   6 -11   11.29    1.01
  -1  -6  10    1.54    0.59
  -1   6  10    1.91    0.72
  -1   6  10    1.27    0.45
   1   6 -10    1.78    0.54
  -1  -6   9   -0.14    0.26
  -1   6   9    0.44    0.49
  -1   6   9    0.22    0.28
   1  -6  -9    0.37    0.32
   1  -6  -9    0.46    0.30
   1   6  -9    0.47    0.38
  -1  -6   8    1.09    0.32
  -1  -6   8    1.68    0.51
  -1   6   8    1.98    0.62
   1   6  -8    1.48    0.47
  -1  -6   7    0.05    0.23
  -1   6   7    0.02    0.21
  -1   6   7    0.11    0.37
   1   6  -7   -0.19    0.26
  -1  -6   6    2.52    0.51
  -1   6   6    2.63    0.41
  -1   6   6    2.10    0.58
   1   6  -6    3.16    0.54
  -1  -6   5   14.77    0.93
  -1   6   5   19.64    0.90
  -1   6   5   15.34    1.06
   1   6  -5   16.79    0.97
  -1  -6   4    2.77    0.44
  -1   6   4    2.63    0.52
   1   6  -4    3.38    0.51
  -1  -6   3   16.65    0.83
  -1   6   3   20.12    0.91
  -1   6   3   17.28    0.95
   1   6  -3   18.82    0.97
  -1  -6   2    5.20    0.45
  -1   6   2    6.74    0.58
  -1   6   2    5.48    0.59
   1   6  -2    6.40    0.61
  -1  -6   1  126.29    1.80
  -1   6   1  147.43    2.44
  -1   6   1  132.26    2.10
   1   6  -1  143.57    2.49
   1   6  -1  142.12    1.95
  -1   6   0    3.99    0.50
  -1   6   0    3.48    0.43
   1   6   0    3.64    0.47
   1   6   0    3.60    0.41
  -1   6  -1   73.58    1.82
   1  -6   1   70.91    1.58
   1   6   1   76.52    1.81
   1   6   1   69.84    1.62
  -1   6  -2   -0.01    0.23
   1  -6   2    0.39    0.25
   1   6   2    0.14    0.18
   1   6   2    0.10    0.25
  -1   6  -3  128.07    2.52
   1  -6   3  112.00    2.27
   1   6   3  133.54    2.43
   1   6   3  117.41    2.41
  -1   6  -4    1.00    0.40
   1  -6   4    1.31    0.38
   1   6   4    1.21    0.34
   1   6   4    0.72    0.35
  -1   6  -5   54.53    1.78
   1  -6   5   50.28    1.75
   1   6   5   60.58    1.71
   1   6   5   55.56    1.89
  -1   6  -6    0.10    0.34
   1  -6   6    0.02    0.26
   1   6   6    0.38    0.28
   1   6   6   -0.09    0.28
   1   6   6    0.07    0.17
  -1  -6  -7  115.68    2.45
  -1  -6  -7  119.61    2.50
  -1   6  -7  115.70    2.72
   1  -6   7  103.85    2.79
   1   6   7  111.79    2.93
   1   6   7  120.42    2.07
  -1  -6  -8    1.48    0.45
  -1  -6  -8    1.34    0.41
  -1   6  -8    1.14    0.52
   1  -6   8    1.22    0.49
   1   6   8    1.45    0.57
   1   6   8    0.83    0.34
  -1  -6  -9   42.77    1.61
  -1   6  -9   39.07    1.75
   1  -6   9   38.94    1.93
   1   6   9   39.57    1.98
   1   6   9   43.69    1.53
  -1  -6 -10    0.71    0.43
  -1   6 -10    0.58    0.49
   1  -6  10    0.45    0.46
   1   6  10    0.30    0.54
   1   6  10    0.14    0.35
  -1   6 -11   12.81    1.20
   1  -6  11    9.73    1.16
   1   6  11   11.00    1.25
  -1   6 -12    1.08    0.60
   1  -6  12    1.31    0.69
   1   6  12    1.10    0.71
   1  -6  13    5.29    1.11
   1   6  13    5.55    1.11
   1  -6  14    1.20    0.78
   1   6  14    2.44    0.96
   1  -6  15    2.35    0.95
   1   6  15    4.22    1.13
   1  -6  16    1.63    0.87
   1   6  16    2.09    0.97
   1  -6  17    0.32    0.75
   1   6  17    0.20    0.82
   1  -6  18    0.09    0.73
   1   6  18    0.39    0.85
   1  -6  19    0.35    0.91
   1   6  19    0.01    0.90
   1  -6  20    0.87    1.06
   1   6  20    1.50    1.17
  -1  -7  20    3.45    1.33
  -1   7  20    3.95    1.46
  -1  -7  19   -0.23    0.72
  -1   7  19    0.15    0.92
  -1  -7  18   10.06    1.70
  -1   7  18   11.38    1.79
  -1  -7  17   -0.29    0.56
  -1   7  17    0.09    0.77
  -1  -7  16    4.68    1.20
  -1   7  16    5.20    1.27
  -1  -7  15   -0.09    0.52
  -1   7  15   -0.08    0.68
  -1  -7  14   18.81    1.77
  -1   7  14   20.89    1.90
  -1  -7  13    0.07    0.47
  -1   7  13    0.50    0.71
  -1  -7  12    5.70    1.04
  -1   7  12    5.88    1.08
  -1  -7  11    1.15    0.54
  -1   7  11    1.19    0.67
  -1   7  11    0.68    0.43
   1   7 -11    1.28    0.56
  -1  -7  10    6.39    0.95
  -1   7  10    4.55    0.91
  -1   7  10    5.93    0.74
   1   7 -10    7.58    0.90
  -1  -7   9    0.13    0.30
  -1   7   9    0.25    0.48
  -1   7   9   -0.18    0.22
   1  -7  -9    0.24    0.31
   1  -7  -9    0.25    0.29
   1   7  -9   -0.03    0.35
  -1  -7   8    6.57    0.86
  -1   7   8   11.95    0.83
  -1   7   8    6.87    0.96
   1   7  -8    7.38    0.85
  -1  -7   7    4.01    0.66
  -1   7   7    3.96    0.52
  -1   7   7    3.46    0.69
   1   7  -7    4.11    0.65
  -1  -7   6    0.11    0.27
  -1   7   6    0.18    0.25
  -1   7   6   -0.41    0.38
   1   7  -6    0.27    0.32
  -1  -7   5   14.32    0.95
  -1   7   5   17.05    0.93
  -1   7   5   14.35    1.10
   1   7  -5   15.46    1.01
   1   7  -4    0.89    0.37
  -1  -7   3   18.43    0.92
  -1   7   3   21.02    1.02
  -1   7   3   18.86    1.03
   1   7  -3   20.20    1.08
  -1  -7   2    1.92    0.34
  -1   7   2    2.57    0.46
  -1   7   2    1.78    0.41
   1   7  -2    1.83    0.42
  -1  -7   1   16.04    0.71
  -1   7   1   17.98    0.97
  -1   7   1   15.42    0.84
   1   7  -1   17.99    0.99
   1   7  -1   16.72    0.75
  -1   7   0    1.27    0.36
  -1   7   0    1.42    0.31
   1   7   0    1.55    0.37
   1   7   0    1.55    0.33
  -1   7  -1   10.95    0.82
   1  -7   1   11.57    0.74
   1   7   1   10.94    0.78
   1   7   1   10.96    0.74
  -1   7  -2   38.97    1.48
   1  -7   2   38.39    1.33
   1   7   2   40.86    1.45
   1   7   2   39.58    1.41
  -1   7  -3    1.30    0.43
   1  -7   3    1.40    0.38
   1   7   3    1.38    0.37
   1   7   3    1.07    0.39
  -1   7  -4   58.48    1.89
   1   7   4   86.86    2.13
   1   7   4   47.85    1.72
  -1   7  -5    0.23    0.36
   1  -7   5    0.28    0.28
   1   7   5    0.18    0.25
   1   7   5    0.04    0.35
  -1   7  -6   49.46    1.86
   1  -7   6   48.22    1.89
   1   7   6   60.30    1.85
   1   7   6   45.29    1.87
   1   7   6   48.65    1.12
  -1   7  -7    5.04    0.77
   1  -7   7    3.86    0.70
   1   7   7    3.80    0.59
   1   7   7    3.98    0.74
   1   7   7    4.25    0.48
  -1  -7  -8   71.47    2.09
  -1  -7  -8   71.59    2.09
  -1   7  -8   62.38    2.19
   1  -7   8   60.28    2.33
   1   7   8   68.35    2.51
   1   7   8   72.79    1.73
  -1  -7  -9    5.85    0.77
  -1  -7  -9    7.24    0.81
  -1   7  -9    6.19    0.92
   1  -7   9    5.86    0.91
   1   7   9    5.81    0.92
  -1  -7 -10   66.89    2.12
  -1   7 -10   59.69    2.27
   1  -7  10   49.22    2.31
   1   7  10   47.73    2.28
  -1   7 -11    0.11    0.45
   1  -7  11   -0.25    0.40
   1   7  11    0.57    0.55
  -1   7 -12    8.44    1.09
   1  -7  12    6.90    1.14
   1   7  12    6.93    1.20
   1  -7  13    0.57    0.64
   1   7  13    0.55    0.74
   1  -7  14   21.90    1.93
   1   7  14   25.19    2.06
   1  -7  15    0.53    0.72
   1   7  15   -0.20    0.68
   1  -7  16    1.96    0.95
   1   7  16    2.00    1.02
   1  -7  17   -0.72    0.61
   1   7  17    0.73    0.90
   1  -7  18    1.02    0.98
   1   7  18    1.87    1.05
   1  -7  19    0.04    0.93
   1   7  19    0.58    0.93
  -1  -8  20    0.67    1.00
  -1   8  20    0.09    1.00
  -1  -8  19    2.31    1.18
  -1   8  19    1.57    1.16
  -1  -8  18    0.16    0.78
  -1   8  18    1.40    0.98
  -1  -8  17    2.93    1.10
  -1   8  17    2.94    1.17
  -1  -8  16    0.04    0.62
  -1   8  16    1.11    0.92
  -1  -8  15    7.66    1.36
  -1   8  15    7.98    1.40
  -1  -8  14    0.52    0.64
  -1   8  14    0.53    0.75
  -1  -8  13   10.45    1.40
  -1   8  13    9.67    1.41
  -1  -8  12    0.51    0.53
  -1   8  12    0.12    0.63
  -1  -8  11    6.64    1.05
  -1   8  11    4.41    0.95
   1   8 -11    8.27    1.02
  -1  -8  10    1.69    0.63
  -1   8  10    0.32    0.54
   1   8 -10    1.34    0.55
  -1  -8   9    0.43    0.38
  -1   8   9    0.52    0.35
  -1   8   9    0.67    0.55
  -1   8   9    0.35    0.29
   1   8  -9    0.80    0.48
  -1  -8   8    0.79    0.44
  -1   8   8    1.25    0.40
  -1   8   8    1.07    0.59
   1   8  -8    1.13    0.51
  -1  -8   7    6.77    0.81
  -1   8   7    7.08    0.69
  -1   8   7    5.33    0.85
   1   8  -7    6.61    0.82
  -1  -8   6    0.28    0.27
  -1   8   6    0.33    0.28
  -1   8   6    0.03    0.41
   1   8  -6   -0.10    0.30
  -1  -8   5   12.26    0.92
  -1   8   5   14.33    0.92
  -1   8   5   11.62    1.00
   1   8  -5   15.36    1.06
  -1  -8   4   12.82    0.88
  -1   8   4   14.96    0.94
  -1   8   4    9.90    0.91
   1   8  -4   10.24    0.88
  -1  -8   3  175.43    2.87
  -1   8   3  204.22    3.28
  -1   8   3  176.94    3.14
   1   8  -3  201.21    3.47
  -1  -8   2    0.25    0.21
  -1   8   2    0.12    0.25
  -1   8   2   -0.07    0.27
   1   8  -2    0.10    0.27
   1   8  -2    0.27    0.20
  -1  -8   1  163.42    2.30
  -1   8   1  187.40    3.20
  -1   8   1  170.49    2.68
   1   8  -1  187.34    3.29
   1   8  -1  173.03    2.47
  -1  -8   0    3.37    0.39
  -1   8   0    3.90    0.58
  -1   8   0    3.10    0.43
   1   8   0    4.39    0.61
   1   8   0    3.13    0.45
  -1   8  -1  319.00    4.30
  -1   8  -1  290.83    2.92
   1  -8   1  305.52    3.58
   1   8   1  322.11    4.27
   1   8   1  302.86    3.76
  -1   8  -2    0.53    0.36
   1  -8   2    0.69    0.35
   1   8   2    0.98    0.35
   1   8   2    0.72    0.36
  -1   8  -3  315.37    4.45
   1  -8   3  257.75    3.73
   1   8   3  319.21    4.28
   1   8   3  282.67    4.07
  -1   8  -4    0.32    0.35
   1  -8   4    0.50    0.32
   1   8   4    0.64    0.32
   1   8   4   -0.15    0.32
  -1   8  -5  193.20    3.65
   1  -8   5  166.43    3.36
   1   8   5  200.33    3.46
   1   8   5  177.49    3.57
  -1   8  -6    0.37    0.40
   1  -8   6    0.38    0.32
   1   8   6    0.29    0.30
   1   8   6    0.08    0.41
  -1   8  -7  221.43    4.10
   1  -8   7  190.23    3.98
   1   8   7  227.18    3.79
   1   8   7  203.47    4.20
  -1  -8  -8    0.75    0.44
  -1  -8  -8    0.56    0.37
  -1   8  -8    0.58    0.51
   1  -8   8    0.18    0.37
   1   8   8    0.42    0.48
  -1  -8  -9  104.75    2.69
  -1  -8  -9   97.46    2.60
  -1   8  -9   98.30    2.92
   1  -8   9   83.50    2.92
   1   8   9  101.17    3.25
  -1  -8 -10    0.85    0.51
  -1   8 -10    0.75    0.60
   1  -8  10    0.56    0.50
   1   8  10    0.23    0.58
  -1   8 -11   26.71    1.70
   1  -8  11   23.90    1.77
   1   8  11   27.02    1.93
  -1   8 -12    0.54    0.60
   1  -8  12    0.48    0.59
   1   8  12   -0.02    0.57
   1  -8  13   14.32    1.58
   1   8  13   18.04    1.78
   1  -8  14   -0.01    0.63
   1   8  14    0.58    0.78
   1  -8  15    5.16    1.22
   1   8  15    7.33    1.40
   1  -8  16   -0.34    0.59
   1   8  16   -0.26    0.71
   1  -8  17    0.59    0.79
   1   8  17    0.10    0.73
   1  -8  18    0.26    0.80
   1   8  18    0.69    0.92
   1  -8  19   -0.23    0.81
   1   8  19    0.50    0.99
  -1  -9  19   -0.31    0.75
  -1   9  19    0.39    0.95
  -1  -9  18    8.14    1.60
  -1   9  18    8.90    1.68
  -1  -9  17   -0.01    0.61
  -1   9  17    0.17    0.80
  -1  -9  16    6.52    1.37
  -1   9  16    7.10    1.44
  -1  -9  15    0.31    0.58
  -1   9  15    0.26    0.80
  -1  -9  14    8.68    1.39
  -1   9  14    8.65    1.44
  -1  -9  13    4.43    1.07
  -1   9  13    5.16    1.17
  -1  -9  12    8.20    1.24
  -1   9  12    8.21    1.29
  -1  -9  11    4.23    0.94
  -1   9  11    4.20    1.02
   1   9 -11    4.32    0.84
  -1   9  10    0.12    0.53
  -1  -9   9    5.19    0.88
  -1   9   9    5.62    0.73
  -1   9   9    4.49    0.91
   1   9  -9    4.21    0.81
  -1  -9   8    0.07    0.33
  -1   9   8    0.31    0.32
  -1   9   8    0.24    0.56
   1   9  -8   -0.07    0.35
  -1  -9   7   13.49    1.12
  -1   9   7   19.01    1.12
  -1   9   7   14.16    1.29
   1   9  -7   17.43    1.24
  -1  -9   6    0.24    0.31
  -1   9   6    0.14    0.24
  -1   9   6    0.11    0.46
   1   9  -6   -0.11    0.32
  -1  -9   5    0.19    0.26
  -1   9   5    0.19    0.25
  -1   9   5   -0.02    0.38
   1   9  -5    0.08    0.31
  -1  -9   4   13.63    0.95
  -1   9   4   16.41    1.05
  -1   9   4   11.78    1.03
   1   9  -4   12.71    1.03
  -1  -9   3   16.97    0.97
  -1   9   3   19.38    1.15
  -1   9   3   17.38    1.11
   1   9  -3   20.73    1.24
  -1  -9   2    0.74    0.30
  -1   9   2    0.59    0.37
  -1   9   2    0.42    0.35
   1   9  -2    0.81    0.40
   1   9  -2    1.11    0.28
  -1  -9   1    4.01    0.47
  -1   9   1    5.73    0.71
  -1   9   1    4.91    0.60
   1   9  -1    5.51    0.71
   1   9  -1    4.00    0.49
  -1  -9   0    2.90    0.39
  -1   9   0    2.13    0.51
  -1   9   0    2.44    0.44
   1   9   0    2.63    0.52
   1   9   0    2.61    0.44
  -1   9  -1    5.14    0.70
  -1   9  -1    3.89    0.45
   1  -9   1    3.72    0.54
   1   9   1    4.08    0.62
   1   9   1    4.70    0.58
  -1   9  -2    7.28    0.82
  -1   9  -2    5.82    0.49
   1  -9   2    6.97    0.73
   1   9   2    6.80    0.74
   1   9   2    7.29    0.76
  -1   9  -3    6.95    0.83
   1  -9   3    7.57    0.77
   1   9   3    7.99    0.79
   1   9   3    7.12    0.81
  -1   9  -5    2.80    0.64
   1  -9   5    2.51    0.57
   1   9   5    2.75    0.54
   1   9   5    2.48    0.62
  -1   9  -6   30.86    1.64
   1  -9   6   28.47    1.56
   1   9   6   33.44    1.55
   1   9   6   29.07    1.67
  -1   9  -7    0.56    0.48
   1  -9   7    0.29    0.37
   1   9   7    0.80    0.39
   1   9   7    0.12    0.47
  -1   9  -8   41.36    1.98
   1  -9   8   33.54    1.85
   1   9   8   48.54    1.90
   1   9   8   36.65    2.02
  -1  -9  -9    3.83    0.74
  -1  -9  -9    4.14    0.72
  -1   9  -9    3.40    0.79
   1  -9   9    3.41    0.78
   1   9   9    3.20    0.84
  -1  -9 -10   43.62    1.88
  -1  -9 -10   40.95    1.84
  -1   9 -10   41.20    2.08
   1  -9  10   30.33    1.93
   1   9  10   29.05    1.96
  -1   9 -11    1.17    0.63
   1  -9  11    1.26    0.65
   1   9  11    1.56    0.76
  -1   9 -12   23.26    1.72
   1  -9  12   17.49    1.67
   1   9  12   20.20    1.84
   1  -9  13   -0.14    0.53
   1   9  13    0.12    0.62
   1  -9  14   10.23    1.52
   1   9  14   12.45    1.65
   1  -9  15    0.60    0.69
   1   9  15    0.05    0.74
   1  -9  16    5.55    1.37
   1   9  16    6.88    1.48
   1  -9  17   -0.04    0.71
   1   9  17    0.17    0.85
   1  -9  18    1.95    1.11
   1   9  18    2.98    1.24
   1  -9  19   -0.49    0.78
   1   9  19   -0.03    0.98
  -1 -10  19    0.87    0.93
  -1  10  19    1.10    1.12
  -1 -10  18    0.58    0.85
  -1  10  18    1.41    1.12
  -1 -10  17    1.81    0.97
  -1  10  17    2.31    1.16
  -1 -10  16    1.10    0.84
  -1  10  16    0.70    0.88
  -1 -10  15    1.98    0.89
  -1  10  15    3.92    1.20
  -1 -10  14    3.29    1.03
  -1  10  14    3.02    1.07
  -1 -10  13    9.14    1.38
  -1  10  13    9.54    1.43
  -1 -10  12    3.43    0.94
  -1  10  12    2.97    0.95
   1  10 -12    4.82    0.94
  -1 -10  11    7.33    1.16
  -1  10  11    8.00    1.24
   1  10 -11    9.14    1.16
  -1 -10  10    3.85    0.85
  -1  10  10    3.36    0.95
   1  10 -10    3.38    0.79
  -1 -10   9    5.52    0.92
  -1  10   9    7.05    0.81
  -1  10   9    5.43    0.99
   1  10  -9    5.82    0.92
  -1 -10   8    4.31    0.79
  -1  10   8    4.64    0.68
  -1  10   8    3.84    0.87
   1  10  -8    4.60    0.84
  -1 -10   7    7.22    0.87
  -1  10   7    8.06    0.83
  -1  10   7    7.13    1.00
   1  10  -7    8.43    0.97
  -1 -10   6    0.15    0.28
  -1  10   6   -0.11    0.24
  -1  10   6   -0.09    0.45
   1  10  -6   -0.13    0.32
  -1 -10   5    8.68    0.86
  -1  10   5   11.92    0.97
  -1  10   5    8.81    1.02
   1  10  -5    9.79    0.99
  -1  10   4    0.91    0.47
  -1 -10   3    6.90    0.70
  -1  10   3    8.56    0.84
  -1  10   3    7.67    0.84
   1  10  -3    8.58    0.90
  -1 -10   2    2.16    0.43
  -1  10   2    2.41    0.54
  -1  10   2    2.73    0.54
   1  10  -2    2.19    0.54
   1  10  -2    1.97    0.37
  -1 -10   1   28.11    1.09
  -1  10   1   31.34    1.52
  -1  10   1   28.59    1.28
   1  10  -1   29.18    1.50
   1  10  -1   30.62    1.20
  -1 -10   0    3.74    0.45
  -1  10   0    3.92    0.66
  -1  10   0    3.66    0.53
   1  10   0    3.64    0.63
   1  10   0    4.06    0.56
  -1  10  -1   35.03    1.65
  -1  10  -1   34.40    1.17
   1 -10   1   34.71    1.38
   1  10   1   36.67    1.65
   1  10   1   34.41    1.45
  -1  10  -2   11.56    1.04
  -1  10  -2    9.95    0.62
   1 -10   2   10.45    0.86
   1  10   2   11.35    0.96
   1  10   2   10.60    0.91
  -1  10  -3   92.71    2.70
   1 -10   3   78.75    2.24
   1  10   3   99.42    2.68
   1  10   3   85.91    2.45
  -1  10  -4    2.88    0.67
   1 -10   4    2.99    0.60
   1  10   4    4.00    0.66
   1  10   4    3.12    0.66
  -1  10  -5   63.98    2.35
   1 -10   5   57.42    2.13
   1  10   5   66.23    2.23
   1  10   5   61.20    2.31
  -1  10  -6    7.96    1.02
   1 -10   6    6.56    0.90
   1  10   6    8.72    0.91
   1  10   6    7.88    0.99
  -1  10  -7  107.46    3.13
   1 -10   7   91.37    2.93
   1  10   7  106.54    2.87
   1  10   7   93.91    3.06
  -1  10  -8    1.46    0.64
   1 -10   8    2.94    0.72
   1  10   8    3.88    0.70
   1  10   8    3.33    0.85
  -1  10  -9   29.42    1.81
   1 -10   9   27.82    1.80
   1  10   9   28.88    1.95
  -1 -10 -10    3.03    0.72
  -1  10 -10    2.66    0.77
   1 -10  10    3.13    0.88
   1  10  10    1.58    0.82
  -1  10 -11   18.49    1.56
   1 -10  11   16.37    1.59
   1  10  11   16.93    1.63
  -1  10 -12    0.69    0.64
   1 -10  12    1.24    0.70
   1  10  12    1.20    0.78
   1 -10  13    6.99    1.31
   1  10  13    7.60    1.36
   1 -10  14    0.72    0.78
   1  10  14    1.06    0.77
   1 -10  15    2.25    0.97
   1  10  15    2.85    1.07
   1 -10  16    0.71    0.81
   1  10  16    0.63    0.90
   1 -10  17    0.48    0.81
   1  10  17    1.43    0.97
   1 -10  18    0.84    0.90
   1  10  18    2.08    1.18
   1 -10  19   -0.32    0.90
  -1 -11  18    3.39    1.21
  -1  11  18    4.73    1.46
  -1 -11  17    0.57    0.79
  -1  11  17    3.08    1.26
  -1 -11  16    1.75    0.93
  -1  11  16    3.18    1.15
  -1 -11  15    1.95    0.90
  -1  11  15    0.83    0.90
  -1 -11  14    2.29    0.91
  -1  11  14    4.61    1.22
  -1 -11  13    7.51    1.30
  -1  11  13    7.35    1.38
  -1 -11  12    5.56    1.12
  -1  11  12    6.85    1.27
   1  11 -12    6.92    1.12
  -1 -11  11   15.13    1.50
  -1  11  11   17.30    1.71
   1  11 -11   21.27    1.62
  -1 -11  10    0.27    0.47
  -1  11  10    1.03    0.72
   1  11 -10    1.23    0.62
  -1 -11   9   16.84    1.42
  -1  11   9   22.58    1.38
  -1  11   9   17.29    1.57
   1  11  -9   20.19    1.52
  -1 -11   8    0.63    0.44
  -1  11   8    0.23    0.34
  -1  11   8    1.32    0.70
   1  11  -8    0.27    0.48
  -1 -11   7   38.67    1.91
  -1  11   7   43.62    1.84
  -1  11   7   37.10    2.03
   1  11  -7   40.30    1.99
  -1 -11   6    3.39    0.68
  -1  11   6    4.27    0.72
  -1  11   6    3.79    0.83
   1  11  -6    4.05    0.79
  -1 -11   5   51.06    1.98
  -1  11   5   57.94    2.11
  -1  11   5   51.16    2.15
   1  11  -5   55.96    2.25
  -1 -11   4    0.14    0.27
  -1  11   4    0.47    0.33
  -1  11   4    0.56    0.44
   1  11  -4    0.40    0.39
  -1 -11   3   37.46    1.51
  -1  11   3   41.25    1.80
  -1  11   3   37.79    1.69
   1  11  -3   42.20    1.91
  -1 -11   2    5.08    0.62
  -1  11   2    5.75    0.80
  -1  11   2    3.96    0.66
   1  11  -2    4.71    0.76
   1  11  -2    4.73    0.56
  -1 -11   1   47.05    1.46
  -1  11   1   50.44    2.00
  -1  11   1   47.64    1.67
   1  11  -1   52.09    2.08
   1  11  -1   48.67    1.57
  -1 -11   0    1.37    0.36
  -1  11   0    1.87    0.54
  -1  11   0    1.70    0.44
   1  11   0    1.89    0.51
   1  11   0    1.45    0.42
  -1  11  -1   42.81    1.89
  -1  11  -1   40.87    1.35
   1  11   1   41.48    1.84
   1  11   1   40.00    1.60
  -1  11  -2    8.46    0.97
  -1  11  -2    7.42    0.61
   1 -11   2    7.69    0.84
   1  11   2    8.54    0.90
   1  11   2    8.45    0.87
  -1  11  -3    3.21    0.69
   1 -11   3    2.53    0.58
   1  11   3    3.16    0.63
   1  11   3    2.13    0.58
   1  11   4    3.85    0.71
  -1  11  -5   20.06    1.46
   1 -11   5   19.25    1.33
   1  11   5   20.78    1.35
   1  11   5   21.87    1.51
  -1  11  -6   17.42    1.39
   1 -11   6   16.36    1.29
   1  11   6   16.82    1.25
   1  11   6   17.37    1.42
  -1  11  -7    0.92    0.57
   1 -11   7    0.91    0.53
   1  11   7    1.03    0.46
   1  11   7    0.81    0.61
  -1  11  -8   10.12    1.23
   1 -11   8    9.28    1.12
   1  11   8   11.07    1.08
   1  11   8    9.93    1.24
  -1  11  -9    0.28    0.54
   1 -11   9   -0.24    0.38
   1  11   9    0.58    0.43
   1  11   9    0.13    0.55
  -1  11 -10   20.27    1.65
   1 -11  10   17.08    1.59
   1  11  10   14.80    1.57
  -1  11 -11    3.74    0.94
   1 -11  11    3.70    0.99
   1  11  11    4.38    1.06
  -1  11 -12    8.33    1.25
   1 -11  12    5.82    1.19
   1  11  12    6.59    1.27
   1 -11  13    0.22    0.64
   1  11  13   -0.16    0.64
   1 -11  14    6.89    1.36
   1  11  14    7.63    1.46
   1 -11  15    0.57    0.73
   1  11  15    2.12    1.07
   1 -11  16    1.24    0.87
   1  11  16    1.47    1.02
   1 -11  17    0.25    0.74
   1  11  17    0.17    0.89
   1 -11  18    1.03    0.97
   1  11  18    2.76    1.34
  -1 -12  18    0.93    0.95
  -1  12  18    1.27    1.10
  -1 -12  17   -0.11    0.65
  -1  12  17    0.27    0.92
  -1 -12  16    2.07    1.00
  -1  12  16    3.63    1.23
  -1 -12  15    0.92    0.78
  -1  12  15    0.71    0.87
  -1 -12  14    4.53    1.16
  -1  12  14    5.37    1.33
  -1 -12  13    0.17    0.59
  -1  12  13   -0.25    0.69
  -1 -12  12   13.35    1.54
  -1  12  12   12.63    1.56
   1  12 -12   13.25    1.42
  -1 -12  11    1.50    0.76
  -1  12  11    1.37    0.84
   1  12 -11    1.28    0.70
  -1 -12  10    3.76    0.92
  -1 -12   9    3.06    0.80
  -1  12   9    4.02    0.75
  -1  12   9    4.09    1.01
   1  12  -9    4.13    0.89
  -1 -12   8    9.55    1.13
  -1  12   8   15.07    1.20
  -1  12   8   11.39    1.37
   1  12  -8   11.10    1.23
  -1 -12   7    0.04    0.36
  -1  12   7    0.04    0.30
  -1  12   7   -0.04    0.54
   1  12  -7    0.13    0.44
  -1 -12   6    0.48    0.40
  -1  12   6    0.11    0.33
  -1  12   6    0.41    0.54
   1  12  -6    0.25    0.46
  -1 -12   5    0.44    0.37
  -1  12   5    0.06    0.33
  -1  12   5   -0.05    0.46
   1  12  -5    0.11    0.42
  -1 -12   3   13.41    1.00
  -1  12   3   15.95    1.21
  -1  12   3   12.99    1.13
   1  12  -3   16.38    1.31
  -1 -12   2    0.30    0.30
  -1  12   2    0.05    0.30
  -1  12   2   -0.23    0.35
   1  12  -2    0.20    0.35
   1  12  -2   -0.08    0.22
  -1 -12   1    0.30    0.30
  -1  12   1    0.83    0.44
  -1  12   1    0.15    0.37
   1  12  -1    0.62    0.42
   1  12  -1    0.21    0.32
  -1  12   0    2.08    0.59
  -1  12   0    2.17    0.51
   1  12   0    2.46    0.61
   1  12   0    2.59    0.54
  -1  12  -1   16.58    1.28
  -1  12  -1   16.99    0.97
   1  12   1   16.94    1.28
   1  12   1   15.77    1.12
  -1  12  -2    0.74    0.48
   1 -12   2    0.96    0.48
   1  12   2    1.03    0.47
   1  12   2    0.75    0.46
  -1  12  -3    0.49    0.45
   1 -12   3    0.54    0.40
   1  12   3   -0.06    0.27
   1  12   3   -0.20    0.36
  -1  12  -5   22.97    1.62
   1 -12   5   20.16    1.42
   1  12   5   22.63    1.47
   1  12   5   22.86    1.58
  -1  12  -6    1.20    0.63
   1 -12   6    1.58    0.59
   1  12   6    1.61    0.54
   1  12   6    2.13    0.74
  -1  12  -7   25.87    1.76
   1 -12   7   19.82    1.51
   1  12   7   23.85    1.54
   1  12   7   23.55    1.74
  -1  12  -8    0.90    0.63
   1 -12   8    0.47    0.52
   1  12   8    0.55    0.49
   1  12   8    0.31    0.59
  -1  12  -9    8.25    1.21
   1 -12   9    6.36    1.09
   1  12   9    7.20    1.04
   1  12   9    7.09    1.21
  -1  12 -10    0.44    0.59
   1 -12  10    0.96    0.68
   1  12  10   -0.22    0.61
  -1  12 -11   10.54    1.39
   1 -12  11    6.34    1.20
   1  12  11    8.36    1.34
  -1  12 -12    0.71    0.69
   1 -12  12    0.42    0.62
   1  12  12    0.80    0.78
  -1  12 -13    3.66    1.01
   1 -12  13    3.11    1.03
   1  12  13    2.60    1.01
   1 -12  14    1.94    0.90
   1  12  14    3.94    1.19
   1 -12  15    1.00    0.83
   1  12  15    2.21    1.04
   1 -12  16    3.43    1.19
   1  12  16    5.05    1.42
   1 -12  17    0.39    0.86
   1  12  17    1.78    1.12
   1 -12  18    5.60    1.54
   1  12  18    8.68    1.81
  -1 -13  18    0.20    0.83
  -1 -13  17    0.26    0.82
  -1  13  17    1.53    1.12
  -1 -13  16    1.31    0.93
  -1  13  16    1.97    1.09
  -1 -13  15    2.42    1.01
  -1  13  15    2.43    1.07
  -1 -13  14    3.24    1.07
  -1  13  14    2.38    1.02
  -1 -13  13    6.47    1.27
  -1  13  13    6.92    1.41
  -1 -13  12    1.34    0.73
  -1  13  12    3.09    1.06
   1  13 -12    1.92    0.80
  -1 -13  11   31.20    2.17
  -1  13  11   34.81    2.41
   1  13 -11   37.27    2.24
  -1 -13  10    1.04    0.66
  -1  13  10    1.17    0.80
   1  13 -10    1.96    0.79
  -1 -13   9    5.53    1.03
  -1  13   9    4.72    1.11
   1  13  -9    6.38    1.09
  -1 -13   8   -0.08    0.40
  -1  13   8    0.30    0.44
  -1  13   8    0.75    0.65
   1  13  -8    0.40    0.53
  -1 -13   7   64.62    2.57
  -1  13   7   76.46    2.67
  -1  13   7   65.82    2.77
   1  13  -7   75.45    2.91
  -1 -13   6    1.82    0.60
  -1  13   6    1.70    0.58
  -1  13   6    1.68    0.72
   1  13  -6    0.19    0.47
  -1 -13   5   26.28    1.54
  -1  13   5   31.76    1.75
  -1  13   5   27.84    1.77
   1  13  -5   29.30    1.82
  -1 -13   4    1.06    0.45
  -1  13   4    1.53    0.54
  -1  13   4    1.97    0.64
   1  13  -4    1.28    0.59
  -1 -13   3   43.41    1.74
  -1  13   3   52.06    2.23
  -1  13   3   43.54    1.94
   1  13  -3   50.66    2.30
  -1 -13   2    0.43    0.35
  -1  13   2   -0.01    0.34
  -1  13   2    0.16    0.38
   1  13  -2    0.51    0.44
  -1 -13   1   28.91    1.29
  -1  13   1   32.08    1.80
  -1  13   1   29.13    1.47
   1  13  -1   31.54    1.81
   1  13  -1   31.70    1.41
  -1  13   0    0.16    0.41
  -1  13   0    0.14    0.36
   1  13   0    0.40    0.42
   1  13   0    0.68    0.42
  -1  13  -1   27.31    1.72
   1  13   1   31.76    1.80
   1  13   1   29.06    1.51
  -1  13  -2   -0.04    0.41
   1 -13   2   -0.08    0.35
   1  13   2    0.07    0.35
   1  13   2    0.18    0.39
  -1  13  -3    8.26    1.10
   1 -13   3    8.08    0.96
   1  13   3    9.07    1.06
   1  13   3    8.42    1.01
  -1  13  -4    3.64    0.80
   1 -13   4    2.53    0.64
   1  13   4    3.58    0.75
   1  13   4    3.91    0.79
  -1  13  -5    3.34    0.81
   1 -13   5    2.79    0.71
   1  13   5    4.59    0.84
   1  13   5    3.89    0.81
  -1  13  -6    3.66    0.87
   1 -13   6    2.27    0.71
   1  13   6    2.67    0.72
   1  13   6    1.64    0.71
  -1  13  -7    2.00    0.76
   1 -13   7    2.29    0.73
   1  13   7    2.49    0.72
   1  13   7    1.58    0.75
  -1  13  -8    4.40    0.98
   1 -13   8    3.94    0.92
   1  13   8    4.97    0.91
   1  13   8    2.87    0.88
  -1  13  -9    2.49    0.84
   1 -13   9    2.15    0.82
   1  13   9    3.68    0.87
   1  13   9    3.11    0.97
  -1  13 -10    2.26    0.85
   1 -13  10    2.29    0.86
   1  13  10    1.96    0.87
  -1  13 -11    1.56    0.80
   1 -13  11    2.09    0.87
   1  13  11    2.12    0.94
  -1  13 -12    3.05    0.96
   1 -13  12    1.50    0.84
   1  13  12    2.03    0.95
  -1  13 -13    4.76    1.12
   1 -13  13    2.27    0.98
   1  13  13    2.40    0.99
   1 -13  14    0.39    0.70
   1  13  14    0.92    0.86
   1 -13  15    1.05    0.83
   1  13  15    2.76    1.15
   1 -13  16   -0.46    0.64
   1  13  16    1.26    1.01
   1 -13  17    0.31    0.85
   1  13  17    2.87    1.26
  -1 -14  17    0.17    0.79
  -1  14  17    0.26    0.95
  -1 -14  16    2.81    1.12
  -1  14  16    3.21    1.29
  -1 -14  15   -0.27    0.62
  -1  14  15    0.66    0.90
  -1 -14  14    1.71    0.89
  -1  14  14    3.36    1.21
  -1 -14  13    0.45    0.74
  -1  14  13    1.31    0.90
  -1 -14  12    8.78    1.41
  -1  14  12   11.00    1.66
   1  14 -12   10.06    1.42
  -1 -14  11    0.19    0.55
  -1  14  11    0.72    0.77
   1  14 -11    0.63    0.68
  -1  14  10    9.21    1.43
   1  14 -10   13.90    1.47
  -1 -14   9   -0.18    0.45
  -1  14   9    0.68    0.71
   1  14  -9   -0.25    0.44
  -1 -14   8   10.20    1.22
  -1  14   8   14.90    1.36
  -1  14   8   12.08    1.49
   1  14  -8   11.19    1.32
  -1 -14   7    0.21    0.42
  -1  14   7   -0.04    0.44
  -1  14   7    0.39    0.63
   1  14  -7    0.07    0.47
  -1 -14   6    2.28    0.69
  -1  14   6    2.61    0.73
  -1  14   6    1.74    0.77
   1  14  -6    2.51    0.77
  -1 -14   5   -0.34    0.31
  -1  14   5   -0.25    0.38
  -1  14   5   -0.18    0.50
   1  14  -5   -0.17    0.42
  -1  14   4   10.75    1.18
  -1 -14   3    0.41    0.42
  -1  14   3    0.20    0.41
  -1  14   3    0.73    0.52
   1  14  -3    1.27    0.59
  -1  14   2    0.57    0.50
  -1  14   2    0.13    0.44
   1  14  -2    0.72    0.52
  -1  14   1    2.92    0.75
  -1  14   1    1.56    0.54
   1  14  -1    2.48    0.70
  -1  14   0    0.98    0.57
   1  14   0    1.34    0.57
   1  14   0    1.20    0.50
  -1  14  -1    0.03    0.40
   1  14   1   -0.06    0.38
   1  14   1    0.37    0.42
  -1  14  -2    0.45    0.50
   1  14   2    0.63    0.51
   1  14   2    0.51    0.46
  -1  14  -3   -0.21    0.37
   1 -14   3   -0.02    0.42
   1  14   3    0.07    0.41
   1  14   3    0.33    0.46
  -1  14  -5    3.38    0.88
   1 -14   5    2.62    0.73
   1  14   5    2.54    0.71
   1  14   5    3.84    0.85
  -1  14  -6   -0.16    0.47
   1 -14   6    0.58    0.53
   1  14   6    0.01    0.43
   1  14   6    0.00    0.47
  -1  14  -7    6.56    1.14
   1 -14   7    7.24    1.09
   1  14   7    5.44    0.95
   1  14   7    6.83    1.16
  -1  14  -8    0.55    0.62
   1 -14   8    0.45    0.56
   1  14   8    0.61    0.57
   1  14   8    0.74    0.70
  -1  14  -9    2.55    0.89
   1 -14   9    1.71    0.79
   1  14   9    1.59    0.72
   1  14   9    2.22    0.90
   1 -14  10    0.67    0.60
   1  14  10    0.74    0.71
  -1  14 -11    1.51    0.83
   1 -14  11    0.91    0.73
   1  14  11    0.58    0.78
  -1  14 -12    5.92    1.22
   1 -14  12    2.86    1.01
   1  14  12    3.33    1.13
  -1  14 -13    0.74    0.75
   1 -14  13    0.16    0.65
   1  14  13    0.91    0.82
   1 -14  14    4.71    1.26
   1  14  14    2.81    1.11
   1 -14  15    1.04    0.85
   1  14  15   -0.26    0.79
   1 -14  16    3.46    1.26
   1  14  16    3.09    1.29
   1 -14  17   -0.07    0.81
   1  14  17   -0.09    0.90
  -1 -15  16    0.40    0.87
  -1  15  16    2.23    1.20
  -1 -15  15    1.67    0.99
  -1  15  15    2.64    1.19
  -1 -15  14    0.69    0.75
  -1  15  14    0.39    0.76
  -1 -15  13    5.28    1.24
  -1  15  13    7.12    1.51
  -1 -15  12   -0.35    0.48
  -1  15  12    0.10    0.73
   1  15 -12    0.82    0.71
  -1 -15  11   16.27    1.72
  -1  15  11   22.71    2.10
   1  15 -11   20.69    1.83
  -1 -15  10    1.93    0.86
  -1  15  10    1.66    0.91
   1  15 -10    2.12    0.82
  -1 -15   9   20.56    1.75
  -1  15   9   22.90    1.98
   1  15  -9   22.74    1.86
  -1 -15   8    0.22    0.51
  -1  15   8    0.37    0.49
  -1  15   8    0.03    0.59
   1  15  -8    0.71    0.60
  -1 -15   7   59.87    2.61
  -1  15   7   66.00    2.74
  -1  15   7   61.15    2.84
   1  15  -7   69.15    3.02
  -1 -15   6    1.47    0.62
  -1  15   6    2.51    0.74
  -1  15   6    1.66    0.77
   1  15  -6    1.96    0.77
  -1 -15   5   48.32    2.17
  -1  15   5   60.93    2.63
  -1  15   5   55.14    2.53
   1  15  -5   56.66    2.69
  -1 -15   4    0.37    0.45
  -1  15   4    0.25    0.48
  -1  15   4    0.00    0.50
   1  15  -4    0.82    0.54
  -1  15   3   77.21    2.95
  -1  15   3   71.29    2.62
   1  15  -3   77.77    3.07
  -1  15   2    0.11    0.43
  -1  15   2   -0.33    0.41
   1  15  -2    0.25    0.47
  -1  15   1   40.13    2.18
  -1  15   1   36.53    1.76
   1  15  -1   36.25    2.11
  -1  15   0    0.48    0.52
   1  15   0    0.61    0.51
   1  15   0    0.57    0.41
  -1  15  -1   41.52    2.25
   1  15   1   40.66    2.21
   1  15   1   37.05    1.81
  -1  15  -2    0.36    0.49
   1  15   2    0.22    0.47
   1  15   2   -0.11    0.40
  -1  15  -3   10.84    1.29
   1 -15   3   10.06    1.13
   1  15   3   13.31    1.35
   1  15   3   11.95    1.24
  -1  15  -4    0.96    0.64
   1 -15   4    0.35    0.54
   1  15   4    1.39    0.62
   1  15   4    0.77    0.60
  -1  15  -5    5.08    1.03
   1 -15   5    4.54    0.88
   1  15   5    5.93    1.03
   1  15   5    5.60    1.00
  -1  15  -6    2.51    0.84
   1 -15   6    0.89    0.61
   1  15   6    2.71    0.79
   1  15   6    0.76    0.65
  -1  15  -7    0.97    0.69
   1 -15   7    0.31    0.58
   1  15   7    0.58    0.55
   1  15   7    1.14    0.74
  -1  15  -8    0.61    0.64
   1 -15   8    1.00    0.69
   1  15   8    0.30    0.57
   1  15   8    0.86    0.69
  -1  15  -9    1.05    0.73
   1 -15   9    0.19    0.63
   1  15   9    0.76    0.65
   1  15   9    0.76    0.69
  -1  15 -10    0.41    0.63
   1 -15  10   -0.40    0.49
   1  15  10    0.52    0.72
  -1  15 -11    2.19    0.93
   1 -15  11    1.82    0.91
   1  15  11    2.82    1.02
  -1  15 -12    0.02    0.69
   1 -15  12   -0.46    0.55
   1  15  12   -0.95    0.62
  -1  15 -13    2.37    0.97
   1 -15  13    2.26    1.02
   1  15  13    3.15    1.14
   1 -15  14    0.30    0.71
   1  15  14    0.15    0.80
   1 -15  15    1.50    0.97
   1  15  15    2.48    1.22
   1 -15  16   -0.52    0.72
   1  15  16   -0.12    0.77
  -1 -16  16    0.97    0.92
  -1  16  16    0.95    0.99
  -1 -16  15    0.24    0.80
  -1  16  15    0.89    1.00
  -1 -16  14    1.74    0.94
  -1  16  14    2.61    1.17
  -1 -16  13    0.91    0.83
  -1  16  13    1.41    0.98
  -1 -16  12    3.95    1.14
  -1  16  12    4.72    1.30
   1  16 -12    5.10    1.19
  -1 -16  11    0.59    0.67
  -1  16  11    0.74    0.84
   1  16 -11    0.68    0.73
  -1  16  10    4.68    1.21
   1  16 -10    7.50    1.32
  -1 -16   9    2.14    0.85
  -1  16   9    3.14    1.08
   1  16  -9    3.18    0.96
  -1 -16   8    7.34    1.17
  -1  16   8    9.65    1.29
  -1  16   8    8.63    1.40
   1  16  -8    9.74    1.41
  -1 -16   7    1.40    0.70
  -1  16   7    0.98    0.64
  -1  16   7    0.52    0.67
   1  16  -7    0.65    0.62
  -1 -16   6    1.77    0.69
  -1  16   6    2.32    0.78
  -1  16   6    1.91    0.84
   1  16  -6    1.99    0.83
  -1  16   5   -0.10    0.46
  -1  16   5    0.10    0.56
   1  16  -5    0.07    0.51
  -1  16   4   20.48    1.66
  -1  16   3   -0.35    0.39
  -1  16   3    0.30    0.53
   1  16  -3    0.14    0.51
  -1  16   2    0.10    0.49
  -1  16   2   -0.18    0.47
   1  16  -2   -0.20    0.42
  -1  16   1    1.05    0.63
   1  16  -1    1.02    0.63
  -1  16   0   -0.16    0.43
   1  16   0   -0.38    0.42
  -1  16  -1    1.05    0.63
   1  16   1    0.70    0.56
   1  16   1    1.49    0.58
  -1  16  -2    0.21    0.52
   1  16   2    0.56    0.54
   1  16   2    0.50    0.49
  -1  16  -3    3.27    0.90
   1  16   3    3.56    0.90
   1  16   3    2.61    0.76
   1  16   4    4.28    0.93
   1  16   4    3.70    0.89
  -1  16  -5    1.69    0.78
   1 -16   5    1.01    0.64
   1  16   5    1.47    0.67
   1  16   5    0.81    0.63
  -1  16  -6    0.12    0.55
   1 -16   6    0.29    0.52
   1  16   6    0.26    0.53
   1  16   6    0.10    0.58
  -1  16  -7    3.65    1.01
   1 -16   7    2.73    0.87
   1  16   7    3.60    0.92
   1  16   7    3.06    0.93
  -1  16  -8    0.87    0.72
   1 -16   8    0.27    0.63
   1  16   8    0.16    0.57
   1  16   8    1.03    0.72
  -1  16  -9    1.41    0.85
   1 -16   9    1.59    0.82
   1  16   9    1.33    0.72
   1  16   9    1.35    0.86
  -1  16 -10    3.29    1.03
   1 -16  10    1.88    0.87
   1  16  10    3.37    1.09
  -1  16 -11    2.39    0.99
   1 -16  11    1.03    0.80
   1  16  11    1.33    0.92
  -1  16 -12    5.46    1.23
   1 -16  12    2.84    1.06
   1  16  12    2.65    1.10
  -1  16 -13    0.78    0.76
   1 -16  13    0.38    0.75
   1  16  13   -0.25    0.76
   1 -16  14    4.81    1.34
   1  16  14    4.50    1.42
   1 -16  15    0.10    0.82
   1  16  15   -0.21    0.85
  -1 -17  15    2.24    1.11
  -1  17  15    4.20    1.44
  -1 -17  14   -0.16    0.78
  -1  17  14    0.67    1.01
  -1 -17  13    4.06    1.24
  -1  17  13    4.51    1.36
  -1 -17  12   -0.61    0.57
  -1  17  12   -0.36    0.70
   1  17 -12    0.43    0.70
  -1 -17  11   14.04    1.69
  -1  17  11   15.86    1.90
   1  17 -11   15.89    1.77
  -1 -17  10    0.53    0.71
  -1  17  10    0.70    0.75
   1  17 -10    0.56    0.72
  -1 -17   9   16.74    1.70
  -1  17   9   16.49    1.80
   1  17  -9   17.17    1.77
  -1 -17   8   -0.17    0.51
  -1  17   8   -0.23    0.46
  -1  17   8    0.84    0.70
   1  17  -8    0.94    0.73
  -1 -17   7   40.91    2.32
  -1  17   7   49.57    2.58
  -1  17   7   44.59    2.57
   1  17  -7   47.41    2.71
  -1  17   6    1.67    0.72
  -1  17   6    1.64    0.78
   1  17  -6    0.80    0.67
  -1  17   5   31.36    2.09
  -1  17   5   30.04    2.02
   1  17  -5   31.06    2.20
  -1  17   4    1.62    0.76
  -1  17   4    1.73    0.76
   1  17  -4    1.27    0.72
  -1  17   3   62.19    2.88
  -1  17   3   60.46    2.60
   1  17  -3   60.29    2.93
  -1  17   2    0.20    0.51
   1  17  -2    0.90    0.61
  -1  17   1   21.99    1.79
   1  17  -1   19.90    1.74
  -1  17   0    0.97    0.65
   1  17   0    0.41    0.58
  -1  17  -1   18.78    1.70
   1  17   1   21.19    1.77
  -1  17  -2   -0.07    0.52
   1  17   2    0.09    0.50
   1  17   2    0.27    0.55
  -1  17  -3   12.67    1.49
   1  17   3   12.20    1.41
   1  17   3   10.35    1.27
  -1  17  -4    4.85    1.09
   1  17   4    6.63    1.14
   1  17   4    5.69    1.05
  -1  17  -5   -0.28    0.53
   1 -17   5   -0.63    0.41
   1  17   5    0.32    0.54
   1  17   5   -0.05    0.52
  -1  17  -6    0.96    0.73
   1 -17   6    0.77    0.65
   1  17   6    1.49    0.75
   1  17   6    0.51    0.64
  -1  17  -7    0.77    0.74
   1 -17   7    0.21    0.62
   1  17   7    0.92    0.66
   1  17   7    0.28    0.66
  -1  17  -8    7.96    1.36
   1 -17   8    4.97    1.11
   1  17   8    7.35    1.23
   1  17   8    7.35    1.31
  -1  17  -9    0.32    0.68
   1 -17   9   -0.40    0.56
   1  17   9    0.00    0.64
  -1  17 -10    4.82    1.19
   1 -17  10    3.90    1.16
   1  17  10    2.31    1.01
  -1  17 -11    1.52    0.89
   1 -17  11    0.74    0.82
   1  17  11    0.80    0.80
  -1  17 -12    4.27    1.24
   1 -17  12    4.44    1.25
   1  17  12    4.86    1.36
  -1  17 -13    0.53    0.84
   1 -17  13    0.09    0.78
   1  17  13    0.16    0.75
   1 -17  14    1.69    1.04
   1  17  14    3.64    1.33
   1 -17  15    0.33    0.87
  -1 -18  14    1.23    0.96
  -1  18  14    2.53    1.24
  -1 -18  13    0.48    0.80
  -1  18  13    1.20    1.04
  -1 -18  12    4.10    1.21
  -1  18  12    3.24    1.27
   1  18 -12    3.38    1.15
  -1 -18  11   -0.15    0.65
  -1  18  11    0.67    0.88
   1  18 -11    0.70    0.81
  -1 -18  10    2.54    0.97
  -1  18  10    6.35    1.35
   1  18 -10    4.30    1.16
  -1 -18   9    1.32    0.82
  -1  18   9    1.29    0.92
   1  18  -9    1.11    0.84
  -1  18   8    3.53    1.12
   1  18  -8    5.09    1.21
  -1  18   7   -0.23    0.49
  -1  18   7   -0.25    0.59
   1  18  -7    0.14    0.63
  -1  18   6    1.78    0.80
  -1  18   6    2.17    0.90
   1  18  -6    2.45    0.95
  -1  18   5    0.18    0.53
  -1  18   5    0.08    0.57
   1  18  -5    1.29    0.78
  -1  18   4   16.77    1.66
  -1  18   4   15.34    1.55
  -1  18   3    7.43    1.24
   1  18  -3    7.79    1.31
  -1  18   2    0.23    0.57
   1  18  -2   -0.26    0.49
  -1  18   1    0.69    0.60
   1  18  -1    0.10    0.55
  -1  18   0    1.86    0.83
   1  18   0    2.30    0.85
  -1  18  -1   12.11    1.55
   1  18   1   12.56    1.48
  -1  18  -2    0.59    0.67
   1  18   2    0.33    0.57
  -1  18  -3   14.22    1.60
   1  18   3   12.97    1.50
   1  18   3   12.79    1.38
  -1  18  -4    0.99    0.75
   1  18   4    1.53    0.75
   1  18   4    1.35    0.72
  -1  18  -5   10.51    1.54
   1  18   5   13.69    1.54
   1  18   5   12.75    1.50
  -1  18  -6    0.28    0.62
   1  18   6    0.27    0.56
   1  18   6    0.18    0.57
  -1  18  -7   14.15    1.69
   1 -18   7   13.46    1.56
   1  18   7   16.81    1.68
   1  18   7   15.50    1.70
  -1  18  -8    0.35    0.68
   1 -18   8   -0.08    0.60
   1  18   8   -0.02    0.59
   1  18   8    1.02    0.82
  -1  18  -9    7.55    1.44
   1 -18   9    6.81    1.32
   1  18   9    8.01    1.46
  -1  18 -10    0.83    0.79
   1 -18  10   -0.42    0.67
   1  18  10    1.02    0.90
  -1  18 -11    5.24    1.32
   1 -18  11    4.75    1.28
   1  18  11    5.17    1.36
  -1  18 -12    1.55    0.98
   1 -18  12    2.83    1.16
   1  18  12    2.44    1.13
  -1  18 -13    2.57    1.10
   1 -18  13    0.75    0.93
   1  18  13    1.15    1.03
   1 -18  14    1.91    1.21
   1  18  14    1.45    1.08
  -1 -19  13    2.75    1.21
  -1  19  13    4.39    1.44
  -1 -19  12    0.44    0.85
  -1  19  12    0.84    0.99
   1  19 -12    0.75    0.87
  -1 -19  11    6.79    1.42
  -1  19  11    6.78    1.52
   1  19 -11    8.08    1.54
  -1  19  10    0.16    0.80
   1  19 -10    0.79    0.85
  -1  19   9   14.23    1.83
   1  19  -9   14.37    1.79
  -1  19   8    0.30    0.70
   1  19  -8    0.56    0.75
  -1  19   7   22.00    1.94
  -1  19   7   21.90    1.99
   1  19  -7   24.33    2.15
  -1  19   6    0.94    0.73
  -1  19   6    1.65    0.86
   1  19  -6    1.41    0.83
  -1  19   5   24.55    2.03
  -1  19   5   22.47    1.89
   1  19  -5   22.88    2.06
  -1  19   4    1.16    0.74
   1  19  -4    1.21    0.74
  -1  19   3   30.50    2.23
   1  19  -3   29.85    2.27
  -1  19   2    1.03    0.68
   1  19  -2    1.21    0.78
  -1  19   1   17.61    1.75
   1  19  -1   14.37    1.64
  -1  19   0    0.54    0.65
   1  19   0    0.37    0.61
  -1  19  -1   12.32    1.62
   1  19   1   13.85    1.60
  -1  19  -2    0.07    0.62
   1  19   2    0.46    0.65
  -1  19  -3    6.72    1.29
   1  19   3    6.11    1.19
   1  19   4    3.70    0.98
   1  19   4    3.57    0.96
  -1  19  -5    0.22    0.65
   1  19   5   -0.26    0.51
   1  19   5    0.22    0.59
  -1  19  -6    0.17    0.61
   1  19   6    0.43    0.60
   1  19   6    0.16    0.68
  -1  19  -7   -0.10    0.62
   1  19   7    0.70    0.71
   1  19   7   -0.14    0.60
  -1  19  -8    3.33    1.11
   1  19   8    2.60    1.00
   1  19   8    2.76    1.06
  -1  19  -9    0.79    0.77
   1 -19   9    0.49    0.72
   1  19   9    0.59    0.84
  -1  19 -10    5.80    1.36
   1 -19  10    5.18    1.29
   1  19  10    4.25    1.27
  -1  19 -11    4.22    1.25
   1 -19  11    4.01    1.23
   1  19  11    3.72    1.30
  -1  19 -12    4.69    1.32
   1 -19  12    3.30    1.25
   1  19  12    2.81    1.23
   1 -19  13    1.22    1.07
   1  19  13    1.50    1.00
  -1  20  12    1.31    1.07
   1  20 -12    1.39    0.96
  -1  20  11    0.44    0.90
   1  20 -11    1.32    0.99
  -1  20  10    0.73    0.91
   1  20 -10    1.47    0.98
  -1  20   9    0.50    0.82
   1  20  -9    1.07    0.91
  -1  20   8    1.14    0.88
   1  20  -8    1.05    0.86
  -1  20   7   -0.18    0.58
  -1  20   7   -0.16    0.66
   1  20  -7    0.41    0.74
  -1  20   6    2.00    0.86
  -1  20   6    1.80    0.92
   1  20  -6    2.47    0.99
  -1  20   5    0.51    0.69
   1  20  -5    1.10    0.81
  -1  20   4    2.28    0.89
   1  20  -4    1.68    0.87
  -1  20   3    3.53    1.02
   1  20  -3    5.44    1.22
  -1  20   2    1.22    0.83
   1  20  -2    0.44    0.68
  -1  20   1    7.44    1.36
   1  20  -1    8.51    1.43
  -1  20   0    0.88    0.75
   1  20   0    2.07    0.93
  -1  20  -1   13.52    1.74
   1  20   1   14.41    1.68
  -1  20  -2   -0.18    0.52
   1  20   2   -0.19    0.57
  -1  20  -3   30.22    2.38
   1  20   3   29.80    2.32
  -1  20  -4    0.76    0.79
   1  20   4    1.07    0.75
  -1  20  -5   18.87    1.99
   1  20   5   19.13    1.90
   1  20   5   17.10    1.75
  -1  20  -6    1.36    0.89
   1  20   6    0.56    0.70
   1  20   6    1.28    0.82
  -1  20  -7   23.95    2.24
   1  20   7   21.34    2.03
   1  20   7   23.03    2.12
  -1  20  -8    1.06    0.88
   1  20   8    2.38    0.99
   1  20   8    1.99    0.98
  -1  20  -9   12.10    1.85
   1  20   9   12.15    1.79
  -1  20 -10    2.14    1.05
   1  20  10    2.63    1.18
   1 -20  11    6.33    1.46
   1  20  11    8.36    1.68
   1 -20  12    0.97    0.95
   1  20  12    2.15    1.17
  -1  21  11    1.35    1.09
  -1  21  10    0.44    0.89
  -1  21   9    1.31    0.96
   1  21  -9    1.52    0.99
  -1  21   8    0.63    0.85
   1  21  -8    0.44    0.80
  -1  21   7    3.45    1.11
   1  21  -7    4.05    1.26
  -1  21   6    0.38    0.72
   1  21  -6    0.36    0.79
  -1  21   5    2.40    1.00
   1  21  -5    2.92    1.11
  -1  21   4    1.80    0.90
   1  21  -4    1.14    0.92
  -1  21   3    2.84    1.02
   1  21  -3    2.86    1.06
  -1  21   2    0.93    0.77
   1  21  -2    0.39    0.73
  -1  21   1    1.59    0.87
   1  21  -1    1.58    0.88
  -1  21   0    0.03    0.62
   1  21   0    0.30    0.69
  -1  21  -1    0.88    0.81
   1  21   1    1.80    0.90
  -1  21  -2    0.75    0.80
   1  21   2    0.62    0.73
  -1  21  -3    0.64    0.74
   1  21   3    0.81    0.74
   1  21   4    9.46    1.57
  -1  21  -5    0.20    0.77
   1  21   5    0.93    0.81
  -1  21  -6    3.26    1.17
   1  21   6    2.80    1.04
  -1  21  -7    0.85    0.83
   1  21   7    0.46    0.75
   1  21   7    1.07    0.84
  -1  21  -8    7.25    1.58
   1  21   8    7.50    1.52
   1  21   9   -0.15    0.78
   1  21  10    7.28    1.63
  -1  22   9    1.43    1.02
  -1  22   6   -0.35    0.68
   1  22  -6    0.49    0.82
  -1  22   5    1.72    0.93
   1  22  -5    2.79    1.12
  -1  22   4   -0.22    0.68
   1  22  -4    0.81    0.83
  -1  22   3   11.16    1.72
   1  22  -3    9.87    1.69
  -1  22   2    0.41    0.74
   1  22  -2    0.19    0.72
  -1  22   1   11.68    1.76
   1  22  -1   11.58    1.76
  -1  22   0    0.30    0.76
   1  22   0    1.06    0.85
  -1  22  -1   21.67    2.17
   1  22   1   19.78    2.07
  -1  22  -2    0.40    0.73
   1  22   2    0.42    0.76
  -1  22  -3   24.30    2.32
   1  22   3   26.43    2.34
  -1  22  -4    0.98    0.81
   1  22   4    0.52    0.76
  -1  22  -5   25.17    2.41
   1  22   5   25.38    2.33
  -1  22  -6    1.34    0.95
   1  22   6   -0.06    0.65
   1  22   7   21.74    2.20
   1  22   8    0.98    0.94
   1  22   9   13.44    2.00
  -1  23   6    0.31    0.76
  -1  23   5    0.18    0.76
  -1  23   4    1.49    0.96
  -1  23   3    0.03    0.78
  -1  23   2   -0.06    0.69
   1  23  -2   -0.41    0.70
  -1  23   1    0.13    0.75
   1  23  -1    0.25    0.79
  -1  23   0    0.62    0.85
   1  23   0    0.27    0.80
  -1  23  -1    1.02    0.96
   1  23   1    0.40    0.80
  -1  23  -2    2.22    1.08
   1  23   2    3.52    1.22
   1  23   3   -0.06    0.72
   1  23   4    8.89    1.60
   1  23   5    0.14    0.79
   1  23   6    6.49    1.48
  -2   0  21   -0.38    0.77
  -2   0  20    1.11    0.94
  -2   0  19   -0.41    0.58
  -2   0  18    5.24    1.21
  -2   0  17    0.19    0.62
  -2   0  16   24.07    1.92
  -2   0  16   21.60    1.85
  -2   0  15    0.36    0.61
  -2   0  15    0.64    0.65
  -2   0  14   32.94    1.93
  -2   0  14   34.02    2.06
  -2   0  13   -0.50    0.46
  -2   0  13   -0.26    0.32
  -2   0  12   77.78    2.63
  -2   0  12   76.23    2.76
  -2   0  11    0.39    0.50
  -2   0  11   -0.07    0.31
  -2   0  10  100.29    2.68
  -2   0  10  100.26    2.85
  -2   0   9   -0.17    0.31
  -2   0   9   -0.27    0.18
   2   0  -9    0.14    0.19
  -2   0   8  152.19    2.92
  -2   0   8  153.48    3.12
  -2   0   7    0.00    0.27
  -2   0   7   -0.45    0.22
  -2   0   6  394.37    4.12
  -2   0   5    0.04    0.19
  -2   0   4  195.81    2.47
  -2   0   3    0.06    0.13
  -2   0   2    8.90    0.30
  -2   0   1    0.04    0.06
  -2   0   0   81.14    1.19
  -2   0  -1   -0.02    0.09
  -2   0  -2   55.09    1.19
  -2   0  -3    0.22    0.18
   2   0   3   -0.02    0.18
   2   0   3    0.12    0.21
  -2   0  -4  104.78    1.88
   2   0   4  134.80    2.05
   2   0   4  124.87    2.06
  -2   0  -5    0.09    0.23
   2   0   5   -0.07    0.20
   2   0   5    0.09    0.20
  -2   0  -6  135.26    2.41
   2   0   6  154.99    2.56
   2   0   6  145.85    2.64
  -2   0  -7    0.44    0.34
   2   0   7    0.07    0.28
   2   0   7    0.00    0.26
  -2   0  -8  122.10    2.52
   2   0   8  152.93    2.91
   2   0   8  140.33    2.98
  -2   0  -9   -0.08    0.34
   2   0   9    0.12    0.35
   2   0   9    0.04    0.30
  -2   0 -10   49.99    1.83
   2   0  10   57.87    2.04
   2   0  10   52.08    2.07
  -2   0 -11   -0.07    0.50
   2   0  11   -0.05    0.44
   2   0  11   -0.11    0.36
   2   0  12   33.46    1.76
   2   0  12   29.53    1.78
   2   0  13    0.52    0.53
   2   0  13    0.31    0.52
   2   0  14   33.10    1.94
   2   0  14   28.84    1.96
   2   0  15    0.20    0.63
   2   0  16    6.88    1.26
   2   0  17   -0.30    0.61
   2   0  18    2.22    1.05
   2   0  19    0.71    0.85
  -2  -1  21    4.50    1.39
  -2   1  21    4.40    1.32
  -2  -1  20   -0.06    0.74
  -2   1  20    0.02    0.75
  -2  -1  19    5.42    1.33
  -2   1  19    4.65    1.23
  -2  -1  18    0.14    0.65
  -2   1  18   -0.13    0.55
  -2  -1  17    6.08    1.22
  -2   1  17    6.41    1.25
  -2   1  17    6.43    1.22
  -2  -1  16    0.02    0.52
  -2   1  16    0.22    0.72
  -2   1  16   -0.04    0.48
  -2  -1  15   41.66    2.24
  -2  -1  15   43.28    2.47
  -2   1  15   38.05    2.23
  -2   1  15   44.85    2.45
  -2  -1  14   -0.09    0.51
  -2  -1  14    0.11    0.45
  -2   1  14    1.37    0.69
  -2   1  14    0.03    0.43
  -2  -1  13   10.67    1.20
  -2  -1  13    8.92    1.16
  -2   1  13    9.61    1.19
  -2   1  13    7.83    1.06
  -2  -1  12    0.21    0.52
  -2  -1  12    0.33    0.42
  -2   1  12    0.72    0.57
  -2   1  12    0.58    0.44
  -2  -1  11   62.44    2.21
  -2  -1  11   64.75    2.45
  -2   1  11   43.55    1.97
  -2   1  11   62.76    2.36
  -2  -1  10    0.12    0.39
  -2  -1  10    0.61    0.40
  -2   1  10    0.96    0.51
  -2   1  10    0.17    0.31
  -2  -1   9    6.15    0.75
  -2  -1   9    6.03    0.78
  -2   1   9    6.82    0.82
  -2   1   9    5.88    0.75
   2   1  -9    6.63    0.50
  -2  -1   8   26.74    1.25
  -2  -1   8   29.89    1.43
  -2   1   8   29.07    1.40
  -2   1   8   29.10    1.40
   2   1  -8   33.87    0.87
  -2  -1   7   16.58    0.94
  -2  -1   7   18.62    1.09
  -2   1   7   16.45    1.02
   2   1  -7   18.77    0.63
  -2  -1   6   16.23    0.84
  -2   1   6   17.82    1.00
   2   1  -6   17.24    0.55
  -2  -1   5    0.30    0.21
  -2   1   5    0.40    0.25
   2   1  -5    0.11    0.14
  -2  -1   4  224.48    2.55
  -2   1   4  223.73    2.77
   2   1  -4  240.18    2.07
  -2  -1   3    1.87    0.26
  -2   1   3    1.88    0.30
   2   1  -3    1.54    0.19
  -2   1   2   18.66    0.45
   2   1  -2   22.95    0.57
  -2  -1   1   -0.01    0.06
  -2   1   1    0.04    0.08
   2   1  -1    0.09    0.10
  -2  -1   0   43.06    0.90
  -2  -1   0   40.39    0.87
  -2   1   0   38.91    0.84
  -2  -1  -1    0.46    0.15
  -2   1  -1    0.21    0.14
  -2  -1  -2    1.01    0.23
  -2   1  -2    1.25    0.27
   2  -1   2    1.23    0.28
   2   1   2    0.95    0.23
  -2  -1  -3   20.97    0.82
  -2   1  -3   19.90    0.86
   2  -1   3   10.51    0.64
   2   1   3   11.81    0.64
  -2  -1  -4    1.94    0.35
  -2   1  -4    2.75    0.44
   2  -1   4    1.91    0.31
   2  -1   4    1.76    0.35
   2   1   4    1.66    0.35
   2   1   4    1.68    0.31
  -2  -1  -5   22.41    0.96
  -2   1  -5   21.36    1.00
   2  -1   5   28.36    0.98
   2  -1   5   24.76    1.08
   2   1   5   27.87    1.11
   2   1   5   24.59    0.98
  -2  -1  -6    1.79    0.40
  -2   1  -6    1.34    0.38
   2  -1   6    2.56    0.41
   2  -1   6    2.36    0.45
   2   1   6    1.61    0.40
   2   1   6    1.88    0.39
  -2  -1  -7   41.97    1.44
  -2   1  -7   41.69    1.49
   2  -1   7   49.28    1.50
   2  -1   7   45.44    1.67
   2   1   7   48.02    1.63
   2   1   7   45.75    1.56
  -2  -1  -8    0.38    0.34
  -2   1  -8    0.24    0.37
   2  -1   8    0.13    0.30
   2  -1   8    0.13    0.30
   2   1   8   -0.07    0.29
   2   1   8    0.07    0.26
  -2  -1  -9   33.41    1.45
  -2   1  -9   30.40    1.44
   2  -1   9   36.61    1.50
   2  -1   9   34.02    1.65
   2   1   9   35.93    1.61
   2   1   9   33.36    1.54
  -2  -1 -10    0.83    0.51
  -2   1 -10    0.78    0.52
   2  -1  10    0.47    0.43
   2  -1  10    0.75    0.47
   2   1  10    0.54    0.48
   2   1  10    0.69    0.44
  -2  -1 -11   56.02    1.98
  -2   1 -11   57.60    2.08
   2  -1  11   54.14    2.01
   2  -1  11   52.53    2.25
   2   1  11   54.62    2.17
   2   1  11   52.67    2.15
   2  -1  12    0.79    0.52
   2  -1  12   -0.42    0.39
   2   1  12    0.80    0.55
   2   1  12    0.57    0.48
   2  -1  13   26.92    1.60
   2  -1  13   22.85    1.70
   2   1  13   27.00    1.72
   2   1  13   23.28    1.66
   2  -1  14    0.73    0.66
   2   1  14    0.40    0.60
   2   1  14    1.32    0.70
   2  -1  15   28.27    2.07
   2   1  15   30.36    2.02
   2   1  15   30.65    2.09
   2  -1  16   -0.07    0.63
   2   1  16    0.12    0.62
   2  -1  17    8.92    1.46
   2   1  17    6.04    1.24
   2  -1  18   -0.10    0.67
   2   1  18   -0.06    0.72
   2  -1  19    6.42    1.48
   2  -1  20   -0.73    0.76
  -2  -2  21   -0.05    0.83
  -2  -2  20    1.62    0.99
  -2   2  20    1.75    0.96
  -2  -2  19    0.56    0.76
  -2   2  19    0.28    0.76
  -2  -2  18    6.63    1.35
  -2   2  18    7.81    1.43
  -2   2  18    8.30    1.40
  -2  -2  17    0.42    0.60
  -2   2  17    0.41    0.75
  -2   2  17   -0.18    0.50
  -2  -2  16   13.61    1.55
  -2   2  16   15.58    1.66
  -2   2  16   14.80    1.55
  -2  -2  15    1.99    0.80
  -2   2  15    1.99    0.89
  -2   2  15    1.81    0.78
  -2  -2  14   47.26    2.19
  -2  -2  14   49.32    2.52
  -2   2  14   48.23    2.41
  -2   2  14   50.49    2.43
  -2  -2  13    1.88    0.67
  -2  -2  13    1.31    0.60
  -2   2  13    1.33    0.71
  -2   2  13    1.68    0.64
  -2  -2  12   55.03    2.13
  -2  -2  12   53.22    2.39
  -2   2  12   54.00    2.35
  -2   2  12   56.57    2.33
  -2  -2  11    7.97    0.92
  -2  -2  11   10.87    1.11
  -2   2  11    9.36    1.10
  -2   2  11   10.31    1.04
  -2  -2  10   70.13    2.13
  -2  -2  10   66.60    2.40
  -2   2  10   73.02    2.44
  -2   2  10   71.17    2.34
   2   2 -10   79.91    1.63
  -2  -2   9    5.93    0.73
  -2  -2   9    5.03    0.73
  -2   2   9    5.23    0.74
  -2   2   9    4.90    0.70
   2   2  -9    5.52    0.54
  -2  -2   8  103.32    2.25
  -2  -2   8  114.26    2.80
  -2   2   8  118.55    2.77
   2   2  -8  136.79    1.94
  -2  -2   7    3.71    0.49
  -2  -2   7    3.32    0.54
  -2   2   7    5.07    0.65
   2   2  -7    3.76    0.40
  -2  -2   6   89.32    1.81
  -2  -2   6   90.71    2.18
  -2   2   6   93.65    2.19
   2   2  -6  105.98    1.56
  -2  -2   5    1.05    0.26
  -2  -2   5    0.91    0.30
  -2   2   5    1.09    0.33
   2   2  -5    0.99    0.24
  -2  -2   4   32.06    0.93
  -2   2   4   27.52    1.04
   2   2  -4   33.30    0.81
  -2   2   3    1.49    0.19
  -2   2   3    1.01    0.26
   2   2  -3    1.33    0.22
  -2   2   2    0.11    0.14
  -2   2   2    0.04    0.13
   2   2  -2    0.10    0.12
  -2   2   1    0.33    0.16
   2   2  -1    0.53    0.16
  -2   2   0   24.95    0.75
   2   2   0   26.87    0.79
  -2  -2  -1    3.83    0.35
  -2  -2  -1    3.26    0.33
  -2   2  -1    3.29    0.40
   2   2   1    3.45    0.35
  -2  -2  -2    9.40    0.55
  -2  -2  -2    9.66    0.54
  -2   2  -2    8.40    0.61
   2  -2   2    9.37    0.60
   2   2   2    9.71    0.59
   2  -2   3    1.25    0.31
   2   2   3    0.89    0.31
  -2  -2  -4   44.29    1.26
  -2   2  -4   39.73    1.28
   2  -2   4   48.91    1.44
   2   2   4   53.27    1.48
   2   2   4   48.21    1.15
  -2  -2  -5    0.84    0.28
  -2   2  -5    0.68    0.33
   2  -2   5    0.95    0.26
   2  -2   5    0.95    0.33
   2   2   5    1.12    0.35
   2   2   5    0.84    0.27
  -2  -2  -6   88.78    1.97
  -2   2  -6   70.14    1.85
   2  -2   6   89.21    1.73
   2  -2   6   76.70    2.08
   2   2   6   84.61    2.11
   2   2   6   81.50    1.83
  -2  -2  -7    1.59    0.41
  -2   2  -7    1.68    0.47
   2  -2   7    1.90    0.38
   2  -2   7    1.71    0.47
   2   2   7    2.30    0.51
   2   2   7    1.30    0.36
  -2  -2  -8   37.21    1.43
  -2   2  -8   36.64    1.54
   2  -2   8   41.16    1.41
   2  -2   8   34.91    1.60
   2   2   8   38.93    1.64
   2   2   8   36.69    1.47
  -2  -2  -9    0.10    0.34
  -2   2  -9    0.18    0.43
   2  -2   9    0.45    0.35
   2  -2   9    0.10    0.36
   2   2   9   -0.14    0.32
   2   2   9    0.41    0.32
  -2  -2 -10   34.41    1.54
  -2   2 -10   33.99    1.63
   2  -2  10   40.03    1.61
   2  -2  10   33.92    1.78
   2   2  10   37.10    1.78
   2   2  10   33.43    1.60
  -2  -2 -11    2.37    0.68
  -2   2 -11    1.60    0.69
   2  -2  11    2.43    0.61
   2  -2  11    2.76    0.73
   2   2  11    2.52    0.69
   2   2  11    2.13    0.60
  -2   2 -12    6.95    1.03
   2  -2  12    7.54    0.91
   2  -2  12    6.00    0.99
   2   2  12    6.66    0.99
   2   2  12    6.62    0.95
   2  -2  13   -0.15    0.46
   2   2  13   -0.03    0.52
   2   2  13    0.53    0.52
   2  -2  14   21.53    1.77
   2   2  14   28.06    1.88
   2   2  14   27.24    1.84
   2  -2  15    0.22    0.61
   2   2  15    1.16    0.78
   2   2  15    0.85    0.70
   2  -2  16    1.08    0.73
   2   2  16    1.62    0.91
   2   2  16    1.22    0.75
   2  -2  17    1.01    0.84
   2  -2  18    0.09    0.74
   2  -2  19   -0.28    0.74
   2  -2  20   -0.10    0.91
  -2  -3  21    0.84    0.96
  -2  -3  20    0.98    0.92
  -2  -3  19    2.25    0.99
  -2  -3  18    0.78    0.74
  -2   3  18    0.43    0.80
  -2   3  18    1.19    0.82
  -2  -3  17    0.93    0.72
  -2   3  17    1.53    0.94
  -2   3  17    0.47    0.63
  -2  -3  16    1.23    0.74
  -2   3  16    2.15    0.94
  -2   3  16    2.17    0.85
  -2  -3  15   13.11    1.50
  -2   3  15   12.28    1.53
  -2   3  15   13.72    1.42
  -2  -3  14   17.59    1.60
  -2   3  14   17.48    1.63
  -2   3  14   19.57    1.58
  -2  -3  13    0.86    0.53
  -2   3  13    0.18    0.58
  -2   3  13    0.38    0.44
  -2  -3  12   24.06    1.44
  -2  -3  12   24.41    1.67
  -2   3  12   25.11    1.71
  -2   3  12   26.11    1.59
  -2  -3  11   12.63    1.07
  -2  -3  11   12.99    1.21
  -2   3  11   13.42    1.28
  -2   3  11   12.95    1.12
  -2  -3  10   52.29    1.79
  -2  -3  10   54.68    2.22
  -2   3  10   51.08    2.13
  -2   3  10   55.10    2.04
   2   3 -10   61.43    1.58
  -2  -3   9    0.81    0.38
  -2  -3   9    0.70    0.36
  -2   3   9    0.97    0.50
  -2   3   9    0.36    0.28
   2   3  -9    0.63    0.32
  -2  -3   8  144.12    2.55
  -2  -3   8  163.17    3.39
  -2   3   8  164.66    3.36
   2   3  -8  188.09    2.53
  -2  -3   7    6.72    0.61
  -2  -3   7    6.52    0.70
  -2   3   7    7.34    0.81
   2   3  -7    6.90    0.54
  -2  -3   6   60.11    1.43
  -2  -3   6   58.16    1.78
  -2   3   6   56.95    1.77
   2   3  -6   72.90    1.47
  -2  -3   5    0.56    0.21
  -2  -3   5    0.27    0.19
  -2   3   5    0.20    0.13
  -2   3   5    0.57    0.33
   2   3  -5    0.09    0.18
  -2  -3   4  333.87    2.97
  -2  -3   4  289.46    3.38
  -2   3   4  368.58    2.78
  -2   3   4  309.40    3.57
   2   3  -4  307.02    2.89
  -2   3   3    1.83    0.25
  -2   3   3    1.92    0.36
   2   3  -3    1.51    0.28
  -2   3   2    2.29    0.30
  -2   3   2    2.29    0.32
   2   3  -2    2.48    0.32
  -2   3   1    0.12    0.18
   2   3  -1   -0.07    0.12
  -2   3   0  470.80    3.65
   2   3   0  503.93    3.86
  -2   3  -1    0.90    0.29
   2   3   1    1.42    0.28
   2   3   1    0.91    0.26
  -2   3  -2    0.35    0.27
   2  -3   2    0.07    0.25
   2   3   2    0.12    0.17
   2   3   2    0.08    0.21
  -2  -3  -3    3.47    0.42
  -2  -3  -3    3.77    0.42
  -2   3  -3    3.72    0.51
   2  -3   3    4.39    0.51
   2   3   3    4.21    0.49
  -2  -3  -4   43.80    1.30
  -2  -3  -4   40.65    1.25
  -2   3  -4   39.05    1.34
   2  -3   4   43.26    1.42
   2   3   4   45.63    1.45
  -2  -3  -5    9.29    0.67
  -2   3  -5   10.11    0.82
   2  -3   5   11.86    0.84
   2   3   5   11.14    0.83
   2   3   5   11.00    0.62
  -2  -3  -6   27.32    1.14
  -2   3  -6   24.39    1.21
   2  -3   6   32.16    0.98
   2  -3   6   27.52    1.31
   2   3   6   29.16    1.34
   2   3   6   28.87    1.06
  -2  -3  -7   32.06    1.29
  -2   3  -7   26.10    1.31
   2  -3   7   33.29    1.10
   2  -3   7   30.72    1.48
   2   3   7   31.34    1.46
   2   3   7   30.66    1.20
  -2  -3  -8    9.41    0.81
  -2   3  -8    5.94    0.78
   2  -3   8    5.35    0.59
   2  -3   8    4.39    0.72
   2   3   8    5.78    0.78
   2   3   8    5.67    0.65
  -2  -3  -9   13.06    0.99
  -2   3  -9   12.10    1.08
   2  -3   9   14.25    0.90
   2  -3   9   13.42    1.15
   2   3   9   12.65    1.11
   2   3   9   11.36    0.90
  -2  -3 -10    6.91    0.83
  -2   3 -10    6.71    0.93
   2  -3  10    6.77    0.76
   2  -3  10    5.10    0.86
   2   3  10    5.97    0.88
   2   3  10    5.31    0.74
  -2  -3 -11   45.93    1.81
  -2   3 -11   41.06    1.84
   2  -3  11   42.05    2.12
   2   3  11   41.68    2.04
   2   3  11   41.56    1.85
  -2   3 -12   -0.34    0.51
   2  -3  12   -0.05    0.42
   2   3  12    0.01    0.45
   2   3  12    0.19    0.40
   2  -3  13    8.18    1.20
   2   3  13    8.92    1.16
   2   3  13    7.01    1.02
   2  -3  14    1.11    0.67
   2   3  14    1.42    0.78
   2   3  14    1.08    0.66
   2  -3  15   22.60    1.93
   2   3  15   20.15    1.78
   2   3  15   22.54    1.77
   2  -3  16    0.10    0.61
   2   3  16    0.64    0.73
   2  -3  17    4.89    1.23
   2   3  17    5.63    1.25
   2  -3  18   -0.28    0.72
   2  -3  19    1.81    1.08
   2  -3  20   -0.91    0.78
  -2  -4  21    0.27    0.91
  -2  -4  20    2.11    1.13
  -2  -4  19    1.06    0.84
  -2   4  19    1.72    1.09
  -2  -4  18    4.93    1.25
  -2   4  18    4.96    1.26
  -2  -4  17    0.49    0.63
  -2   4  17    0.05    0.73
  -2   4  17    0.24    0.58
  -2  -4  16    5.71    1.23
  -2   4  16    6.69    1.30
  -2   4  16    6.83    1.16
  -2  -4  15    1.19    0.71
  -2   4  15    1.41    0.89
  -2   4  15    1.05    0.64
  -2  -4  14   47.18    2.55
  -2   4  14   45.42    2.50
  -2   4  14   48.14    2.33
  -2  -4  13    0.08    0.43
  -2   4  13    0.33    0.62
  -2   4  13    0.19    0.38
  -2  -4  12   16.64    1.43
  -2   4  12   18.03    1.54
  -2   4  12   17.95    1.33
  -2  -4  11    6.70    0.80
  -2  -4  11    7.31    1.00
  -2   4  11    6.64    1.02
  -2   4  11    7.94    0.90
  -2  -4  10   58.30    1.81
  -2  -4  10   66.23    2.47
  -2   4  10   69.56    2.53
  -2   4  10   65.21    2.19
   2   4 -10   76.26    1.90
  -2  -4   9    0.61    0.34
  -2  -4   9    0.18    0.33
  -2   4   9    0.27    0.44
   2   4  -9    0.79    0.34
  -2  -4   8   58.04    1.59
  -2  -4   8   66.75    2.23
  -2   4   8   70.56    2.31
   2  -4  -8   79.98    1.32
   2   4  -8   71.95    1.73
  -2  -4   7    3.56    0.44
  -2  -4   7    3.29    0.57
  -2   4   7    3.37    0.63
   2   4  -7    4.37    0.53
  -2  -4   6   64.76    1.44
  -2  -4   6   72.31    2.03
  -2   4   6   87.88    1.38
  -2   4   6   71.70    2.07
   2   4  -6   78.37    1.69
  -2  -4   5    0.09    0.15
  -2  -4   5   -0.02    0.13
  -2   4   5    0.02    0.13
  -2   4   5   -0.04    0.28
   2   4  -5    0.10    0.19
  -2  -4   4  114.56    1.69
  -2  -4   4   98.61    2.02
  -2   4   4  130.87    1.74
  -2   4   4   92.61    2.05
   2   4  -4  113.10    1.93
  -2  -4   3    3.31    0.39
  -2   4   3    3.73    0.39
  -2   4   3    3.96    0.48
   2   4  -3    4.21    0.44
  -2  -4   2   16.44    0.68
  -2   4   2   17.43    0.74
  -2   4   2   16.35    0.78
   2   4  -2   17.88    0.79
  -2   4   1    1.82    0.35
  -2   4   1    2.24    0.32
   2   4  -1    2.04    0.33
  -2   4   0    5.27    0.54
   2   4   0    6.71    0.52
   2   4   0    5.60    0.47
  -2   4  -1    6.90    0.63
   2  -4   1    7.70    0.61
   2   4   1    8.15    0.57
   2   4   1    7.57    0.57
  -2   4  -2   43.84    1.35
   2  -4   2   46.18    1.34
   2   4   2   47.50    1.32
   2   4   2   47.08    1.36
  -2   4  -3   13.66    0.87
   2  -4   3   10.22    0.72
   2   4   3   13.40    0.76
   2   4   3   12.51    0.82
  -2  -4  -4    1.68    0.37
  -2  -4  -4    1.46    0.33
  -2   4  -4    1.34    0.41
   2  -4   4    1.39    0.37
   2   4   4    1.34    0.37
  -2  -4  -5   16.99    0.90
  -2  -4  -5   16.09    0.88
  -2   4  -5   14.79    0.97
   2  -4   5   15.47    0.99
   2   4   5   15.10    0.95
   2   4   5   17.73    0.71
  -2  -4  -6   24.16    1.11
  -2   4  -6   21.25    1.18
   2  -4   6   24.28    1.28
   2   4   6   21.19    1.19
   2   4   6   25.70    0.96
  -2  -4  -7   10.81    0.82
  -2   4  -7   10.81    0.95
   2  -4   7   12.98    0.66
   2  -4   7   11.42    0.98
   2   4   7   11.98    1.01
   2   4   7   11.38    0.74
  -2   4  -8    8.75    0.95
   2  -4   8   10.12    0.68
   2  -4   8    9.18    0.95
   2   4   8    8.25    0.93
   2   4   8    8.75    0.75
  -2  -4  -9    4.64    0.68
  -2   4  -9    5.26    0.82
   2  -4   9    4.76    0.56
   2  -4   9    4.40    0.78
   2   4   9    3.65    0.74
   2   4   9    4.21    0.62
  -2  -4 -10   16.96    1.16
  -2   4 -10   16.61    1.28
   2  -4  10   15.84    1.33
   2   4  10   17.40    1.34
   2   4  10   16.43    1.12
  -2  -4 -11    3.62    0.71
  -2   4 -11    5.10    0.90
   2  -4  11    3.63    0.83
   2   4  11    4.52    0.87
   2   4  11    4.43    0.73
  -2   4 -12    6.91    1.03
   2  -4  12    7.81    1.13
   2   4  12    7.59    1.09
   2   4  12    6.67    0.92
   2  -4  13   -0.20    0.50
   2   4  13    0.30    0.56
   2   4  13   -0.19    0.44
   2  -4  14   11.72    1.43
   2   4  14   13.42    1.50
   2  -4  15    0.15    0.61
   2   4  15   -0.27    0.64
   2  -4  16    1.54    0.88
   2   4  16    1.43    0.83
   2  -4  17   -0.28    0.62
   2   4  17    0.91    0.85
   2  -4  18    0.41    0.83
   2   4  18    1.67    0.97
   2  -4  19    0.87    0.92
   2  -4  20   -0.10    0.95
  -2  -5  20    1.26    1.00
  -2   5  20    1.96    1.20
  -2  -5  19    3.28    1.16
  -2   5  19    3.85    1.30
  -2  -5  18    0.91    0.80
  -2   5  18    1.91    1.01
  -2  -5  17    6.06    1.28
  -2   5  17    6.51    1.37
  -2  -5  16    1.48    0.78
  -2   5  16    2.49    1.02
  -2  -5  15    5.69    1.16
  -2   5  15    6.32    1.26
  -2   5  15    6.14    1.05
  -2  -5  14    1.60    0.74
  -2   5  14    2.69    0.91
  -2   5  14    3.18    0.80
  -2  -5  13   12.06    1.35
  -2   5  13   11.44    1.41
  -2   5  13   10.46    1.12
  -2  -5  12    0.23    0.43
  -2   5  12    0.20    0.60
  -2   5  12    0.36    0.41
  -2  -5  11    5.14    0.88
  -2   5  11    5.88    0.97
  -2   5  11    7.48    0.85
  -2  -5  10   48.54    1.62
  -2  -5  10   54.14    2.28
  -2   5  10   54.59    2.33
  -2   5  10   56.49    2.02
   2   5 -10   60.00    1.81
  -2  -5   9    1.25    0.39
  -2  -5   9    0.95    0.45
  -2   5   9    1.35    0.61
   2   5  -9    1.12    0.40
  -2  -5   8   34.14    1.20
  -2  -5   8   35.80    1.68
  -2   5   8   40.69    1.85
   2  -5  -8   46.24    1.15
   2  -5  -8   45.99    1.15
   2   5  -8   42.59    1.46
  -2  -5   7    4.86    0.49
  -2  -5   7    4.48    0.65
  -2   5   7    5.69    0.47
  -2   5   7    4.76    0.71
   2   5  -7    5.69    0.62
  -2  -5   6  189.14    2.38
  -2  -5   6  181.59    3.29
  -2   5   6  242.73    2.65
  -2   5   6  167.71    3.23
   2   5  -6  200.12    2.94
  -2  -5   5    0.34    0.16
  -2  -5   5    0.15    0.18
  -2   5   5    0.33    0.19
  -2   5   5    0.20    0.29
   2   5  -5    0.23    0.23
  -2  -5   4  178.03    2.13
  -2  -5   4  147.65    2.55
  -2   5   4  170.60    2.26
  -2   5   4  140.67    2.62
   2   5  -4  161.10    2.53
  -2  -5   3    0.88    0.25
  -2   5   3    0.88    0.26
  -2   5   3    0.91    0.35
   2   5  -3    0.93    0.30
  -2  -5   2  185.87    2.35
  -2   5   2  207.44    2.62
  -2   5   2  183.08    2.58
   2   5  -2  207.95    2.83
  -2   5   1    0.01    0.22
  -2   5   1    0.40    0.23
   2   5  -1    0.13    0.19
  -2   5   0  360.84    3.71
  -2   5   0  328.64    2.89
   2   5   0  369.52    3.83
   2   5   0  349.72    3.42
  -2   5  -1    0.04    0.24
   2  -5   1   -0.26    0.21
   2   5   1    0.28    0.20
   2   5   1    0.14    0.20
  -2   5  -2  111.47    2.22
   2  -5   2   99.32    2.03
   2   5   2  115.88    2.20
   2   5   2  111.09    2.18
  -2   5  -3   -0.08    0.28
   2  -5   3    0.21    0.25
   2   5   3    0.04    0.16
   2   5   3   -0.08    0.25
  -2   5  -4   93.78    2.21
   2  -5   4   95.67    2.25
   2   5   4  101.53    2.17
   2   5   4   95.54    2.27
  -2  -5  -5    7.35    0.67
  -2  -5  -5    7.07    0.65
  -2   5  -5    7.63    0.81
   2  -5   5    6.53    0.71
   2   5   5    6.07    0.69
  -2  -5  -6   51.30    1.64
  -2  -5  -6   49.29    1.61
  -2   5  -6   50.05    1.78
   2  -5   6   46.84    1.79
   2   5   6   51.72    1.90
   2   5   6   53.17    1.28
  -2  -5  -7    3.99    0.61
  -2   5  -7    3.77    0.69
   2  -5   7    2.99    0.62
   2   5   7    4.21    0.68
   2   5   7    3.94    0.48
  -2  -5  -8   48.25    1.69
  -2   5  -8   32.66    1.58
   2  -5   8   39.07    1.09
   2  -5   8   31.82    1.68
   2   5   8   31.96    1.65
   2   5   8   35.04    1.31
  -2  -5  -9    2.60    0.59
  -2   5  -9    2.05    0.65
   2  -5   9    2.06    0.64
   2   5   9    1.02    0.55
   2   5   9    1.99    0.48
  -2  -5 -10   10.59    0.98
  -2   5 -10    9.33    1.09
   2  -5  10    9.45    1.10
   2   5  10   11.72    1.22
   2   5  10   10.89    0.93
  -2  -5 -11   21.62    1.34
  -2   5 -11   20.10    1.45
   2  -5  11   17.77    1.51
   2   5  11   18.12    1.49
   2   5  11   18.74    1.24
  -2   5 -12    0.19    0.57
   2  -5  12    0.53    0.56
   2   5  12    0.69    0.59
   2  -5  13    2.27    0.84
   2   5  13    2.40    0.89
   2  -5  14    1.74    0.84
   2   5  14    1.94    0.90
   2  -5  15    6.48    1.29
   2   5  15    6.29    1.24
   2  -5  16   -0.13    0.65
   2   5  16    0.04    0.70
   2  -5  17    1.10    0.83
   2   5  17    1.51    1.00
   2  -5  18   -0.45    0.71
   2   5  18    0.82    0.96
   2  -5  19    1.20    1.08
   2  -5  20    0.00    0.94
  -2  -6  20   -0.12    0.81
  -2   6  20    0.19    0.97
  -2  -6  19    1.03    0.90
  -2   6  19    2.27    1.18
  -2  -6  18   -0.29    0.60
  -2   6  18    0.60    0.87
  -2  -6  17    0.64    0.70
  -2   6  17    0.86    0.90
  -2  -6  16    0.08    0.57
  -2   6  16   -0.48    0.69
  -2  -6  15    0.11    0.55
  -2   6  15    0.48    0.85
  -2  -6  14    0.07    0.54
  -2   6  14    0.10    0.67
  -2   6  14    0.42    0.52
  -2  -6  13    2.27    0.82
  -2   6  13    2.79    0.97
  -2   6  13    2.86    0.73
  -2  -6  12    1.35    0.62
  -2   6  12    1.81    0.76
  -2   6  12    1.40    0.54
  -2  -6  11    2.11    0.63
  -2   6  11    1.88    0.74
  -2   6  11    1.54    0.49
  -2  -6  10    0.78    0.45
  -2   6  10    0.92    0.64
   2   6 -10    1.04    0.44
  -2  -6   9   15.21    0.89
  -2  -6   9   17.29    1.30
  -2   6   9   14.51    1.27
   2   6  -9   17.51    1.09
  -2  -6   8   16.42    0.83
  -2  -6   8   18.18    1.25
  -2   6   8   26.61    1.00
  -2   6   8   17.25    1.32
   2   6  -8   17.52    1.05
  -2  -6   7    5.50    0.50
  -2  -6   7    4.35    0.66
  -2   6   7    6.29    0.54
  -2   6   7    4.67    0.77
   2   6  -7    5.85    0.68
  -2  -6   6   22.82    0.83
  -2  -6   6   20.27    1.16
  -2   6   6   28.44    1.03
  -2   6   6   20.95    1.30
   2   6  -6   23.05    1.12
  -2  -6   5    7.93    0.49
  -2  -6   5    7.28    0.68
  -2   6   5    8.35    0.61
  -2   6   5    6.75    0.79
   2   6  -5    7.58    0.68
  -2  -6   4   -0.06    0.13
  -2   6   4    0.19    0.19
  -2   6   4    0.14    0.28
   2   6  -4    0.11    0.22
  -2  -6   3    0.20    0.17
  -2   6   3    0.30    0.24
  -2   6   3    0.21    0.31
   2   6  -3    0.26    0.25
  -2  -6   2    1.82    0.30
  -2   6   2    1.54    0.35
  -2   6   2    1.89    0.39
   2   6  -2    1.92    0.39
  -2  -6   1    1.96    0.27
  -2   6   1    2.19    0.41
  -2   6   1    2.21    0.37
   2   6  -1    2.00    0.39
  -2   6   0    5.65    0.62
  -2   6   0    5.48    0.47
   2   6   0    6.75    0.62
   2   6   0    6.59    0.55
  -2   6  -1   12.73    0.85
   2   6   1   13.35    0.82
   2   6   1   12.65    0.78
  -2   6  -2    9.29    0.78
   2  -6   2    7.62    0.68
   2   6   2    8.87    0.70
   2   6   2    8.92    0.73
  -2   6  -3   30.26    1.32
   2  -6   3   32.73    1.33
   2   6   3   33.76    1.31
   2   6   3   29.53    1.30
  -2   6  -4    2.04    0.49
   2  -6   4    1.19    0.41
   2   6   4    2.06    0.43
   2   6   4    1.72    0.45
  -2   6  -5   15.10    1.06
   2  -6   5   15.75    1.07
   2   6   5   16.01    0.98
   2   6   5   15.12    1.09
  -2  -6  -6   25.40    1.25
  -2  -6  -6   25.28    1.23
  -2   6  -6   24.94    1.36
   2  -6   6   24.28    1.36
   2   6   6   23.96    1.36
   2   6   6   26.51    0.87
  -2  -6  -7   18.30    1.10
  -2  -6  -7   17.85    1.08
  -2   6  -7   16.39    1.19
   2  -6   7   17.39    1.23
   2   6   7   18.49    1.29
   2   6   7   18.34    0.84
  -2   6  -8    0.06    0.43
   2  -6   8    0.21    0.39
   2   6   8    0.56    0.47
   2   6   8    0.19    0.29
  -2  -6  -9    9.72    0.92
  -2   6  -9    9.99    1.10
   2  -6   9    8.51    1.03
   2   6   9   10.58    1.15
   2   6   9   10.00    0.80
  -2  -6 -10    6.72    0.87
  -2   6 -10    8.13    1.07
   2  -6  10    7.62    1.09
   2   6  10    7.13    1.02
  -2   6 -11    2.12    0.72
   2  -6  11    2.50    0.78
   2   6  11    3.01    0.83
  -2   6 -12    0.88    0.64
   2  -6  12    1.07    0.68
   2   6  12    0.32    0.63
   2  -6  13   -0.27    0.51
   2   6  13    0.08    0.61
   2  -6  14    2.52    0.96
   2   6  14    3.49    1.04
   2  -6  15    0.05    0.67
   2   6  15    0.08    0.70
   2  -6  16   -0.32    0.61
   2   6  16    0.64    0.84
   2  -6  17    0.78    0.83
   2   6  17    1.10    0.91
   2  -6  18    0.12    0.82
   2   6  18    0.32    0.87
   2  -6  19    0.58    0.97
   2   6  19    1.93    1.15
  -2  -7  20   -0.35    0.81
  -2   7  20    0.46    1.05
  -2  -7  19   -0.45    0.67
  -2   7  19    0.22    0.89
  -2  -7  18    1.16    0.82
  -2   7  18    1.14    0.98
  -2  -7  17    0.41    0.69
  -2   7  17    0.19    0.77
  -2  -7  16   -0.17    0.50
  -2   7  16   -0.14    0.75
  -2  -7  15    0.51    0.61
  -2   7  15    0.79    0.82
  -2  -7  14    0.06    0.52
  -2   7  14   -0.22    0.61
  -2  -7  13   -0.17    0.47
  -2   7  13   -0.37    0.62
  -2  -7  12    4.76    0.94
  -2   7  12    4.19    1.03
  -2   7  12    5.50    0.82
  -2  -7  11    0.78    0.47
  -2   7  11    1.11    0.71
  -2   7  11    1.42    0.50
   2   7 -11    1.43    0.51
  -2  -7  10    7.90    0.97
  -2   7  10    8.58    1.16
   2   7 -10   12.07    1.00
  -2  -7   9    3.46    0.73
  -2   7   9    3.92    0.85
   2   7  -9    2.95    0.62
  -2  -7   8   53.93    1.37
  -2  -7   8   50.00    2.06
  -2   7   8   99.59    2.05
  -2   7   8   54.05    2.25
   2   7  -8   61.23    1.98
  -2  -7   7    1.96    0.33
  -2  -7   7    2.34    0.51
  -2   7   7    1.53    0.36
  -2   7   7    2.34    0.61
   2   7  -7    2.05    0.50
  -2  -7   6  206.29    2.41
  -2  -7   6  190.68    3.55
  -2   7   6  253.16    3.29
  -2   7   6  182.00    3.63
   2   7  -6  218.32    3.54
  -2  -7   5    0.73    0.22
  -2  -7   5    0.52    0.28
  -2   7   5    0.54    0.28
  -2   7   5    0.62    0.39
   2   7  -5    0.43    0.32
  -2  -7   4  119.05    2.44
  -2   7   4  140.40    2.48
  -2   7   4  114.17    2.57
   2   7  -4  133.01    2.69
  -2  -7   3    2.31    0.38
  -2   7   3    2.27    0.43
  -2   7   3    2.24    0.46
   2   7  -3    2.96    0.51
  -2  -7   2  590.47    4.61
  -2   7   2  668.84    5.63
  -2   7   2  583.38    5.11
   2   7  -2  670.11    5.96
  -2  -7   1    1.31    0.26
  -2   7   1    1.81    0.42
  -2   7   1    1.37    0.36
   2   7  -1    1.68    0.42
   2   7  -1    1.49    0.33
  -2   7   0  578.69    5.44
  -2   7   0  506.97    4.07
   2   7   0  585.63    5.56
   2   7   0  553.89    4.83
  -2   7  -1   11.34    0.86
  -2   7  -1    9.35    0.55
   2   7   1   10.90    0.82
   2   7   1    9.74    0.76
  -2   7  -2  461.05    5.09
   2  -7   2  454.39    4.73
   2   7   2  485.75    5.13
   2   7   2  454.29    4.85
  -2   7  -3    5.82    0.73
   2  -7   3    6.18    0.71
   2   7   3    6.80    0.69
   2   7   3    4.68    0.64
  -2   7  -4  158.39    3.16
   2  -7   4  140.25    2.93
   2   7   4  172.34    3.14
   2   7   4  154.56    3.14
  -2   7  -5    5.57    0.77
   2  -7   5    5.25    0.71
   2   7   5    5.56    0.69
   2   7   5    5.18    0.76
  -2   7  -6  136.06    3.11
   2  -7   6  118.11    2.98
   2   7   6  147.73    3.02
   2   7   6  131.87    3.19
  -2  -7  -7   12.88    0.99
  -2  -7  -7   13.07    1.00
  -2   7  -7   11.48    1.07
   2  -7   7   11.31    1.05
   2   7   7   10.63    1.09
  -2  -7  -8   46.69    1.79
  -2  -7  -8   34.19    1.55
  -2   7  -8   22.06    1.45
   2  -7   8   21.41    1.47
   2   7   8   21.12    1.50
  -2  -7  -9    1.24    0.51
  -2   7  -9    0.62    0.57
   2  -7   9    0.89    0.50
   2   7   9    0.85    0.58
  -2  -7 -10   19.37    1.28
  -2   7 -10   16.39    1.37
   2  -7  10   14.47    1.37
   2   7  10   17.37    1.50
  -2   7 -11    2.22    0.73
   2  -7  11    1.46    0.68
   2   7  11    1.81    0.76
  -2   7 -12    0.68    0.64
   2  -7  12   -0.03    0.51
   2   7  12    0.00    0.60
   2  -7  13    4.83    1.13
   2   7  13    6.29    1.19
   2  -7  14    1.31    0.81
   2   7  14    1.90    0.99
   2  -7  15   -0.56    0.56
   2   7  15   -0.08    0.60
   2  -7  16    0.20    0.69
   2   7  16    0.51    0.78
   2  -7  17    1.46    0.94
   2   7  17    1.05    0.90
   2  -7  18    0.61    0.85
   2   7  18    0.64    0.91
   2  -7  19    0.06    0.91
   2   7  19    0.45    0.96
  -2  -8  20   -0.17    0.84
  -2   8  20    0.74    1.09
  -2  -8  19    0.40    0.83
  -2   8  19    0.69    1.00
  -2  -8  18   -0.03    0.67
  -2   8  18    0.28    0.88
  -2  -8  17    1.31    0.84
  -2   8  17    2.57    1.13
  -2  -8  16   -0.36    0.47
  -2   8  16   -0.19    0.74
  -2  -8  15   -0.15    0.52
  -2   8  15    0.00    0.70
  -2  -8  14    0.31    0.57
  -2   8  14    0.60    0.75
  -2  -8  13    0.13    0.49
  -2   8  13    0.05    0.61
  -2  -8  12    0.42    0.49
  -2   8  12    0.29    0.64
  -2  -8  11    2.19    0.68
  -2   8  11    3.03    0.89
   2   8 -11    1.63    0.57
  -2  -8  10    5.26    0.91
  -2   8  10    5.90    1.04
   2   8 -10    7.24    0.90
  -2  -8   9    3.78    0.76
  -2   8   9    4.34    0.88
   2   8  -9    5.30    0.80
  -2  -8   8    1.25    0.50
  -2   8   8    1.31    0.38
  -2   8   8    1.33    0.64
   2   8  -8    1.44    0.51
  -2  -8   7    3.27    0.63
  -2   8   7    2.17    0.44
  -2   8   7    3.34    0.75
   2   8  -7    4.22    0.69
  -2  -8   6    0.32    0.19
  -2  -8   6    0.17    0.27
  -2   8   6    0.32    0.29
  -2   8   6    0.32    0.44
   2   8  -6   -0.07    0.31
  -2  -8   5    0.84    0.37
  -2   8   5    0.78    0.36
  -2   8   5    0.55    0.47
   2   8  -5    0.53    0.38
  -2  -8   4    4.60    0.55
  -2   8   4    5.29    0.62
  -2   8   4    4.96    0.69
   2   8  -4    5.89    0.72
  -2  -8   3    6.63    0.60
  -2   8   3    6.23    0.68
  -2   8   3    5.12    0.67
   2   8  -3   11.83    0.94
  -2  -8   2   14.56    0.77
  -2   8   2   16.33    0.99
  -2   8   2   14.75    0.93
   2   8  -2   16.99    1.06
  -2  -8   1   18.54    0.77
  -2   8   1   22.27    1.16
  -2   8   1   18.56    0.94
   2   8  -1   20.81    1.16
   2   8  -1   20.02    0.95
  -2   8   0    0.83    0.35
  -2   8   0    0.63    0.29
   2   8   0    0.66    0.33
   2   8   0    0.51    0.30
  -2   8  -1   27.81    1.34
  -2   8  -1   27.11    0.93
   2   8   1   30.79    1.39
   2   8   1   29.92    1.28
  -2   8  -2    0.10    0.31
   2  -8   2    0.22    0.33
   2   8   2    0.35    0.27
   2   8   2    0.26    0.29
  -2   8  -3   69.51    2.18
   2  -8   3   69.29    2.06
   2   8   3   57.38    1.90
   2   8   3   55.02    1.89
  -2   8  -4    0.78    0.43
   2  -8   4    0.60    0.38
   2   8   4    0.87    0.35
   2   8   4    0.55    0.38
  -2   8  -5   13.02    1.10
   2  -8   5   12.23    1.03
   2   8   5   15.12    1.06
   2   8   5   11.84    1.07
  -2   8  -6    9.06    1.00
   2  -8   6    8.95    0.96
   2   8   6   10.93    0.94
   2   8   6    8.82    1.00
  -2  -8  -7   21.47    1.29
  -2   8  -7   21.45    1.44
   2  -8   7   18.94    1.36
   2   8   7   18.90    1.39
  -2  -8  -8    0.72    0.45
  -2  -8  -8    0.39    0.40
  -2   8  -8    0.26    0.48
   2  -8   8    0.21    0.41
   2   8   8    0.60    0.51
  -2  -8  -9   24.32    1.44
  -2  -8  -9   23.27    1.41
  -2   8  -9   20.48    1.49
   2  -8   9   17.75    1.45
   2   8   9   21.22    1.62
  -2  -8 -10    0.29    0.44
  -2   8 -10    0.02    0.50
   2  -8  10    0.50    0.49
   2   8  10    0.41    0.53
  -2   8 -11    0.86    0.62
   2  -8  11    1.30    0.68
   2   8  11    1.11    0.71
  -2   8 -12    0.62    0.64
   2  -8  12    0.97    0.68
   2   8  12    0.49    0.65
  -2   8 -13    1.30    0.75
   2  -8  13    0.82    0.70
   2   8  13    0.16    0.71
   2  -8  14    0.35    0.63
   2   8  14    0.74    0.74
   2  -8  15   -0.12    0.64
   2   8  15   -0.12    0.72
   2  -8  16   -0.21    0.64
   2   8  16   -0.44    0.71
   2  -8  17    0.90    0.90
   2   8  17    1.54    1.03
   2  -8  18   -0.52    0.75
   2   8  18    0.20    0.88
   2  -8  19    0.87    1.03
   2   8  19    0.97    1.07
  -2  -9  19   -0.46    0.66
  -2   9  19    0.72    1.02
  -2  -9  18    0.56    0.78
  -2   9  18    0.70    1.00
  -2  -9  17    0.29    0.72
  -2   9  17    0.96    0.93
  -2  -9  16   -0.21    0.54
  -2   9  16    0.50    0.75
  -2  -9  15    0.37    0.63
  -2   9  15    1.22    0.88
  -2  -9  14    1.45    0.80
  -2   9  14    0.81    0.84
  -2  -9  13   -0.05    0.44
  -2   9  13    0.38    0.71
  -2  -9  12    0.18    0.43
  -2   9  12    0.98    0.73
  -2  -9  11    1.41    0.63
  -2   9  11    0.79    0.70
   2   9 -11    1.16    0.56
  -2  -9  10   18.27    1.47
  -2   9  10   15.33    1.46
   2   9 -10   18.23    1.32
  -2  -9   9   -0.14    0.28
  -2   9   9    0.15    0.52
   2   9  -9    0.12    0.37
  -2  -9   8   55.20    2.26
  -2   9   8   80.60    2.15
  -2   9   8   54.91    2.41
   2   9  -8   60.75    2.19
  -2  -9   7    1.62    0.51
  -2   9   7    1.39    0.40
  -2   9   7    1.91    0.67
   2   9  -7    2.09    0.57
  -2  -9   6   95.21    2.65
  -2   9   6  115.76    2.58
  -2   9   6   96.30    2.85
   2   9  -6  111.93    2.87
  -2  -9   5    5.52    0.67
  -2   9   5    5.68    0.68
  -2   9   5    4.90    0.75
   2   9  -5    6.68    0.82
  -2  -9   4  188.20    3.26
  -2   9   4  221.16    3.60
  -2   9   4  187.42    3.56
   2   9  -4  218.20    3.89
  -2   9   3    0.64    0.34
  -2   9   3    0.56    0.39
   2   9  -3    0.19    0.30
  -2  -9   2  223.34    3.02
  -2   9   2  261.32    4.00
  -2   9   2  222.43    3.45
   2   9  -2  252.99    4.12
  -2  -9   1    0.43    0.23
  -2   9   1    0.56    0.36
  -2   9   1    0.46    0.34
   2   9  -1    0.54    0.35
   2   9  -1    0.04    0.23
  -2  -9   0  508.94    3.73
  -2   9   0  584.44    6.16
  -2   9   0  521.89    4.59
   2   9   0  580.42    6.22
   2   9   0  553.73    5.30
  -2   9  -1    1.09    0.44
  -2   9  -1    0.79    0.30
   2   9   1    1.12    0.41
   2   9   1    0.99    0.39
  -2   9  -2  202.74    3.77
  -2   9  -2  187.22    2.21
   2  -9   2  177.81    3.20
   2   9   2  209.06    3.76
   2   9   2  199.02    3.50
  -2   9  -3    0.83    0.43
   2  -9   3    0.37    0.37
   2   9   3    0.49    0.38
  -2   9  -4  179.49    3.70
   2  -9   4  152.73    3.28
   2   9   4  191.21    3.65
   2   9   4  172.02    3.57
  -2   9  -5   -0.02    0.39
   2  -9   5    0.63    0.41
   2   9   5    0.73    0.38
   2   9   5    0.44    0.41
  -2   9  -6   87.05    2.73
   2  -9   6   75.24    2.54
   2   9   6   92.81    2.63
   2   9   6   79.87    2.67
  -2   9  -7    1.17    0.57
   2  -9   7    0.43    0.43
   2   9   7    0.73    0.41
   2   9   7    0.61    0.54
  -2  -9  -8   58.62    2.17
  -2  -9  -8   57.36    2.15
  -2   9  -8   45.06    2.13
   2  -9   8   38.29    2.01
   2   9   8   40.43    2.13
  -2  -9  -9    1.06    0.56
  -2  -9  -9    0.45    0.44
  -2   9  -9    1.19    0.63
   2  -9   9    0.15    0.46
   2   9   9    0.60    0.57
  -2  -9 -10   17.66    1.33
  -2  -9 -10   15.63    1.27
  -2   9 -10   15.59    1.45
   2  -9  10   15.13    1.46
   2   9  10   13.79    1.42
  -2   9 -11    2.42    0.80
   2  -9  11    2.10    0.80
   2   9  11    1.48    0.81
  -2   9 -12    3.71    0.96
   2  -9  12    2.98    0.95
   2   9  12    4.29    1.07
  -2   9 -13    0.38    0.66
   2  -9  13    0.50    0.65
   2   9  13    0.40    0.73
   2  -9  14   -0.08    0.64
   2   9  14    0.32    0.72
   2  -9  15    1.21    0.90
   2   9  15    0.67    0.86
   2  -9  16    0.16    0.73
   2   9  16    0.23    0.81
   2  -9  17    0.78    0.91
   2   9  17    1.02    1.03
   2  -9  18    0.23    0.87
   2   9  18    0.89    1.03
   2  -9  19    0.48    0.98
   2   9  19   -0.15    0.90
  -2 -10  19    1.04    0.97
  -2  10  19    1.14    1.05
  -2 -10  18    0.95    0.90
  -2  10  18    0.15    0.93
  -2 -10  17   -0.16    0.66
  -2  10  17    0.74    0.86
  -2 -10  16    1.59    0.88
  -2  10  16    1.78    0.98
  -2 -10  15    0.57    0.65
  -2  10  15    1.34    0.92
  -2 -10  14    2.99    1.01
  -2  10  14    3.31    1.11
  -2 -10  13    0.84    0.61
  -2  10  13    0.84    0.78
  -2 -10  12    0.24    0.54
  -2  10  12    0.37    0.71
  -2 -10  11    1.28    0.64
  -2  10  11    0.80    0.74
   2  10 -11    1.95    0.67
  -2 -10  10    5.39    0.94
  -2  10  10    4.66    1.03
   2  10 -10    5.48    0.89
  -2 -10   9    0.07    0.31
  -2  10   9    0.23    0.61
   2  10  -9    0.32    0.46
  -2 -10   8    0.05    0.32
  -2  10   8    0.54    0.33
  -2  10   8    0.33    0.58
   2  10  -8    0.29    0.42
  -2 -10   7    1.49    0.52
  -2  10   7    0.97    0.43
  -2  10   7    0.54    0.54
   2  10  -7    1.35    0.54
  -2 -10   6    4.83    0.74
  -2  10   6    5.51    0.74
  -2  10   6    4.23    0.81
   2  10  -6    4.47    0.77
  -2 -10   5   -0.33    0.19
  -2  10   5   -0.03    0.25
  -2  10   5    0.08    0.39
   2  10  -5   -0.23    0.32
  -2 -10   4    0.63    0.29
  -2  10   4    0.80    0.38
  -2  10   4    0.79    0.47
   2  10  -4    0.73    0.38
  -2  10   3    0.64    0.35
  -2  10   3    0.59    0.43
  -2 -10   2    6.51    0.61
  -2  10   2    6.76    0.78
  -2  10   2    6.46    0.74
   2  10  -2    5.92    0.80
  -2 -10   1    2.65    0.40
  -2  10   1    2.02    0.53
  -2  10   1    2.04    0.48
   2  10  -1    2.03    0.53
   2  10  -1    3.11    0.50
  -2 -10   0   10.25    0.60
  -2  10   0   11.44    0.99
  -2  10   0    9.89    0.76
   2  10   0   11.32    0.97
   2  10   0   10.96    0.86
  -2  10  -1   14.20    1.11
  -2  10  -1   12.97    0.79
   2  10   1   15.05    1.10
   2  10   1   13.75    0.99
  -2  10  -2    7.17    0.86
  -2  10  -2    6.18    0.52
   2 -10   2    7.61    0.86
   2  10   2    7.35    0.81
   2  10   2    6.66    0.79
  -2  10  -3   47.39    1.99
   2 -10   3   46.93    1.84
   2  10   3   36.48    1.69
   2  10   3   28.55    1.51
  -2  10  -4   23.45    1.47
   2 -10   4   21.37    1.35
   2  10   4   26.29    1.47
   2  10   4   22.33    1.39
  -2  10  -5   16.16    1.31
   2 -10   5   13.23    1.15
   2  10   5   15.24    1.15
   2  10   5   14.18    1.20
  -2  10  -6    4.01    0.82
   2 -10   6    2.93    0.72
   2  10   6    4.12    0.72
   2  10   6    2.94    0.75
  -2  10  -7   17.67    1.43
   2 -10   7   15.66    1.33
   2  10   7   17.50    1.28
   2  10   7   15.02    1.34
  -2  10  -8    5.70    0.99
   2 -10   8    4.50    0.89
   2  10   8    7.77    0.92
   2  10   8    5.24    0.95
  -2 -10  -9   10.12    1.07
  -2 -10  -9   10.43    1.09
  -2  10  -9   11.07    1.32
   2 -10   9   10.45    1.22
   2  10   9   11.28    1.35
  -2 -10 -10   16.37    1.34
  -2 -10 -10   13.32    1.22
  -2  10 -10   14.96    1.47
   2 -10  10   14.21    1.47
   2  10  10   15.33    1.56
  -2  10 -11    4.16    0.96
   2 -10  11    4.96    1.07
   2  10  11    5.29    1.09
  -2  10 -12    0.72    0.68
   2 -10  12    0.66    0.66
   2  10  12    1.18    0.81
  -2  10 -13    0.38    0.65
   2 -10  13    0.11    0.61
   2  10  13    0.25    0.71
   2 -10  14    4.67    1.20
   2  10  14    4.85    1.20
   2 -10  15   -0.01    0.63
   2  10  15    0.13    0.71
   2 -10  16    0.48    0.83
   2  10  16    1.40    1.01
   2 -10  17    1.50    0.97
   2  10  17    1.22    1.02
   2 -10  18   -0.72    0.79
   2  10  18    1.04    1.08
  -2 -11  19    1.92    1.16
  -2  11  19    2.76    1.32
  -2 -11  18   -0.26    0.66
  -2  11  18    0.37    0.96
  -2 -11  17    1.94    1.02
  -2  11  17    3.15    1.28
  -2 -11  16   -0.37    0.56
  -2  11  16   -0.44    0.72
  -2 -11  15    5.00    1.24
  -2  11  15    5.94    1.39
  -2 -11  14    0.30    0.62
  -2  11  14    0.29    0.70
  -2 -11  13    1.27    0.77
  -2  11  13    0.54    0.82
  -2 -11  12    0.00    0.50
  -2  11  12    0.21    0.68
  -2 -11  11    5.61    1.04
  -2  11  11    6.48    1.20
   2  11 -11    7.81    1.11
  -2 -11  10    7.47    1.12
  -2  11  10    8.58    1.30
   2  11 -10   10.03    1.12
  -2 -11   9    1.23    0.59
  -2  11   9    1.63    0.76
   2  11  -9    1.01    0.55
  -2 -11   8   10.99    1.12
  -2  11   8   21.37    1.30
  -2  11   8   12.17    1.37
   2  11  -8   11.63    1.18
  -2 -11   7    2.07    0.60
  -2  11   7    0.99    0.43
  -2  11   7    1.83    0.70
   2  11  -7    2.61    0.67
  -2 -11   6   23.47    1.42
  -2  11   6   28.08    1.48
  -2  11   6   26.91    1.71
   2  11  -6   27.60    1.63
  -2 -11   5    1.12    0.44
  -2  11   5    1.46    0.50
  -2  11   5    0.62    0.56
   2  11  -5    1.79    0.61
  -2 -11   4   64.17    2.04
  -2  11   4   75.18    2.38
  -2  11   4   66.16    2.32
   2  11  -4   71.50    2.49
  -2 -11   3    0.66    0.34
  -2  11   3    1.29    0.47
  -2  11   3    0.63    0.44
   2  11  -3    0.51    0.39
  -2 -11   2   75.80    1.91
  -2  11   2   90.61    2.66
  -2  11   2   77.73    2.26
   2  11  -2   88.08    2.72
  -2 -11   1    2.94    0.46
  -2  11   1    3.62    0.68
  -2  11   1    3.92    0.61
   2  11  -1    3.46    0.68
   2  11  -1    3.81    0.55
  -2 -11   0  151.44    2.19
  -2  11   0  169.81    3.69
  -2  11   0  152.96    2.74
   2  11   0  170.13    3.73
   2  11   0  159.77    3.10
  -2  11  -1    7.17    0.93
  -2  11  -1    5.81    0.63
   2  11   1    8.18    0.89
   2  11   1    7.56    0.82
  -2  11  -2  116.19    3.15
   2 -11   2  104.11    2.65
   2  11   2  114.58    3.08
   2  11   2  109.92    2.83
  -2  11  -3    0.33    0.41
   2 -11   3    0.33    0.39
   2  11   3    0.40    0.34
   2  11   3    0.09    0.35
  -2  11  -4   70.09    2.57
   2 -11   4   60.12    2.22
   2  11   4   71.26    2.46
   2  11   4   67.25    2.42
  -2  11  -5    4.91    0.89
   2 -11   5    3.37    0.74
   2  11   5    5.29    0.81
   2  11   5    3.65    0.78
  -2  11  -6   42.46    2.11
   2 -11   6   34.81    1.86
   2  11   6   42.29    1.96
   2  11   6   39.40    2.07
  -2  11  -7    5.07    0.96
   2 -11   7    5.29    0.92
   2  11   7    6.84    0.92
   2  11   7    5.20    0.95
  -2  11  -8   21.75    1.66
   2 -11   8   19.16    1.56
   2  11   8   25.35    1.60
   2  11   8   18.39    1.56
  -2 -11  -9    1.30    0.68
  -2 -11  -9    1.17    0.59
  -2  11  -9    0.91    0.63
   2 -11   9    1.25    0.69
   2  11   9    1.38    0.74
  -2 -11 -10    7.15    1.09
  -2 -11 -10    6.79    1.02
  -2  11 -10    6.98    1.17
   2 -11  10    6.14    1.13
   2  11  10    5.95    1.15
  -2  11 -11   17.39    1.61
   2 -11  11   16.40    1.65
   2  11  11   16.97    1.73
  -2  11 -12    0.16    0.59
   2 -11  12   -0.34    0.49
   2  11  12    0.11    0.64
  -2  11 -13    3.51    1.03
   2 -11  13    2.51    0.98
   2  11  13    2.46    1.01
   2 -11  14    1.75    0.88
   2  11  14    2.33    1.01
   2 -11  15    5.79    1.38
   2  11  15    6.78    1.46
   2 -11  16   -0.01    0.74
   2  11  16    0.55    0.93
   2 -11  17    2.71    1.16
   2  11  17    2.99    1.31
   2 -11  18   -0.50    0.80
   2  11  18    0.63    1.00
  -2 -12  18    3.40    1.25
  -2  12  18    3.19    1.33
  -2 -12  17    1.01    0.88
  -2  12  17    0.18    0.86
  -2 -12  16    7.54    1.51
  -2  12  16    6.62    1.52
  -2 -12  15   -0.63    0.46
  -2  12  15   -0.16    0.67
  -2 -12  14   14.47    1.70
  -2  12  14   14.97    1.85
  -2 -12  13    0.63    0.67
  -2  12  13   -0.24    0.67
  -2 -12  12   18.86    1.76
  -2  12  12   22.99    2.06
  -2 -12  11    0.36    0.61
  -2  12  11    1.36    0.84
   2  12 -11    0.77    0.59
  -2 -12  10   31.96    2.04
  -2  12  10   35.49    2.26
   2  12 -10   37.87    2.09
  -2 -12   9    0.11    0.38
  -2  12   9   -0.06    0.64
   2  12  -9    0.02    0.44
  -2 -12   8   31.82    1.86
  -2  12   8   45.29    1.95
  -2  12   8   37.32    2.18
   2  12  -8   35.66    1.98
  -2 -12   7    3.39    0.72
  -2  12   7    2.56    0.61
  -2  12   7    3.03    0.85
   2  12  -7    4.19    0.83
  -2 -12   6   16.71    1.25
  -2  12   6   21.01    1.38
  -2  12   6   18.74    1.47
   2  12  -6   19.78    1.47
  -2 -12   5    0.74    0.41
  -2  12   5    0.85    0.44
  -2  12   5    1.17    0.59
   2  12  -5    0.29    0.45
  -2 -12   4   32.19    1.52
  -2  12   4   39.18    1.84
  -2  12   4   33.79    1.77
   2  12  -4   39.21    1.97
  -2 -12   3    1.21    0.41
  -2  12   3    1.18    0.47
  -2  12   3    1.41    0.55
   2  12  -3    1.03    0.51
  -2 -12   2    7.18    0.70
  -2  12   2    7.01    0.90
  -2  12   2    6.35    0.81
   2  12  -2    7.54    0.97
  -2 -12   1    2.04    0.44
  -2  12   1    2.54    0.63
  -2  12   1    2.95    0.57
   2  12  -1    2.79    0.67
   2  12  -1    2.43    0.51
  -2  12   0    3.84    0.74
  -2  12   0    2.66    0.52
   2  12   0    3.21    0.67
   2  12   0    3.38    0.61
  -2  12  -1    1.38    0.53
  -2  12  -1    1.63    0.43
   2  12   1    1.53    0.54
   2  12   1    1.53    0.50
  -2  12  -2    0.16    0.43
   2  12   2    0.47    0.39
   2  12   2    0.03    0.35
   2  12   3    2.91    0.68
  -2  12  -4   12.23    1.24
   2 -12   4   11.04    1.13
   2  12   4   15.41    1.26
   2  12   4   12.77    1.18
  -2  12  -5    4.92    0.94
   2 -12   5    4.41    0.83
   2  12   5    5.97    0.91
   2  12   5    4.24    0.82
  -2  12  -6    4.21    0.89
   2 -12   6    3.22    0.78
   2  12   6    3.89    0.80
   2  12   6    4.11    0.89
  -2  12  -7    4.09    0.91
   2 -12   7    4.04    0.88
   2  12   7    4.70    0.87
   2  12   7    3.96    0.89
  -2  12  -8   21.84    1.72
   2 -12   8   20.53    1.64
   2  12   8   26.65    1.72
   2  12   8   20.47    1.68
  -2  12  -9    0.94    0.62
   2 -12   9    0.44    0.56
   2  12   9    0.52    0.56
   2  12   9    0.65    0.66
  -2 -12 -10   10.14    1.24
  -2 -12 -10   12.09    1.29
  -2  12 -10   11.80    1.37
   2 -12  10   10.59    1.41
   2  12  10   10.92    1.43
  -2  12 -11    3.39    0.96
   2 -12  11    3.35    1.01
   2  12  11    2.53    0.96
  -2  12 -12   12.57    1.50
   2 -12  12   11.71    1.59
   2  12  12   13.28    1.60
  -2  12 -13    0.91    0.73
   2 -12  13    0.76    0.75
   2  12  13    2.57    1.03
   2 -12  14    5.59    1.31
   2  12  14    7.22    1.42
   2 -12  15    0.43    0.75
   2  12  15   -0.16    0.71
   2 -12  16    0.43    0.82
   2  12  16    0.81    0.99
   2 -12  17    0.44    0.87
   2  12  17    0.62    1.01
  -2 -13  18   -0.29    0.72
  -2  13  18    0.53    1.02
  -2 -13  17    4.53    1.34
  -2  13  17    4.51    1.44
  -2 -13  16   -0.13    0.63
  -2  13  16    0.77    0.95
  -2 -13  15    7.37    1.45
  -2  13  15    4.97    1.38
  -2 -13  14    0.07    0.59
  -2  13  14    0.44    0.79
  -2 -13  13    4.03    1.10
  -2  13  13    3.54    1.15
  -2 -13  12   -0.24    0.50
  -2  13  12    0.36    0.74
  -2 -13  11   13.65    1.50
  -2  13  11   14.17    1.68
   2  13 -11   14.15    1.45
  -2 -13  10    0.27    0.51
  -2  13  10    0.00    0.64
   2  13 -10    0.89    0.63
  -2 -13   9    2.28    0.76
  -2  13   9    1.72    0.81
   2  13  -9    1.67    0.70
  -2 -13   8    3.64    0.81
  -2  13   8    4.40    0.78
  -2  13   8    2.48    0.91
   2  13  -8    2.84    0.81
  -2 -13   7    0.79    0.49
  -2  13   7    1.07    0.50
  -2  13   7    1.86    0.78
   2  13  -7    1.78    0.67
  -2 -13   6   -0.38    0.28
  -2  13   6    0.02    0.32
  -2  13   6    0.12    0.53
   2  13  -6   -0.11    0.41
  -2 -13   5    0.65    0.43
  -2  13   5    0.48    0.44
  -2  13   5    0.42    0.57
   2  13  -5    0.35    0.46
  -2 -13   4    9.65    0.93
  -2  13   4   10.50    1.08
  -2  13   4    7.95    1.03
   2  13  -4   10.85    1.17
  -2  13   3    1.44    0.55
  -2  13   3    1.10    0.56
   2  13  -3    1.37    0.58
  -2 -13   2    9.88    0.83
  -2  13   2   11.43    1.14
  -2  13   2    9.79    1.04
   2  13  -2   10.41    1.13
  -2  13   1    2.88    0.72
  -2  13   1    3.25    0.65
   2  13  -1    3.71    0.79
   2  13  -1    4.08    0.63
  -2  13   0   36.93    1.95
  -2  13   0   32.41    1.46
   2  13   0   39.22    2.01
   2  13   0   35.31    1.63
  -2  13  -1    0.77    0.52
   2  13   1    0.58    0.47
   2  13   1    0.28    0.40
  -2  13  -2   29.76    1.82
   2  13   2   29.21    1.76
   2  13   2   28.47    1.60
  -2  13  -3    0.90    0.52
   2 -13   3    0.93    0.49
   2  13   3    0.64    0.42
   2  13   3    0.36    0.45
  -2  13  -4   23.21    1.69
   2 -13   4   20.77    1.48
   2  13   4   22.98    1.59
   2  13   4   22.98    1.59
  -2  13  -5    4.10    0.92
   2 -13   5    4.24    0.84
   2  13   5    3.10    0.75
   2  13   5    3.33    0.82
  -2  13  -6    9.81    1.29
   2 -13   6    8.49    1.13
   2  13   6   10.33    1.16
   2  13   6    9.59    1.23
  -2  13  -7    7.57    1.20
   2 -13   7    7.00    1.08
   2  13   7    8.78    1.17
   2  13   7    7.47    1.14
  -2  13  -8   13.44    1.45
   2 -13   8   14.45    1.47
   2  13   8   17.42    1.50
   2  13   8   13.97    1.48
  -2  13  -9   22.39    1.80
   2 -13   9   17.90    1.67
   2  13   9   20.54    1.63
   2  13   9   17.74    1.74
  -2  13 -10    2.35    0.85
   2 -13  10    2.22    0.86
   2  13  10    1.42    0.78
  -2  13 -11   37.51    2.36
   2 -13  11   31.09    2.27
   2  13  11   36.37    2.48
  -2  13 -12    0.46    0.67
   2 -13  12    1.39    0.84
   2  13  12    0.74    0.79
  -2  13 -13   17.99    1.79
   2 -13  13   14.28    1.75
   2  13  13   16.42    1.89
   2 -13  14    0.81    0.86
   2  13  14    0.71    0.86
   2 -13  15   10.03    1.70
   2  13  15   10.93    1.80
   2 -13  16   -0.21    0.69
   2  13  16    0.26    0.88
   2 -13  17    4.47    1.43
   2  13  17    8.45    1.77
  -2 -14  17    0.11    0.77
  -2  14  17    0.39    1.00
  -2 -14  16    5.18    1.38
  -2  14  16    5.12    1.45
  -2 -14  15    0.28    0.68
  -2  14  15    0.30    0.84
  -2 -14  14    8.73    1.49
  -2  14  14    9.34    1.59
  -2 -14  13    1.11    0.77
  -2  14  13    1.36    0.88
  -2 -14  12   19.39    1.88
  -2  14  12   18.67    1.99
  -2 -14  11    0.24    0.53
  -2  14  11    0.32    0.69
   2  14 -11    0.43    0.63
  -2 -14  10   28.52    2.04
  -2  14  10   28.15    2.18
   2  14 -10   33.63    2.16
  -2 -14   9    0.13    0.49
  -2  14   9    0.32    0.66
   2  14  -9   -0.05    0.52
  -2 -14   8   24.42    1.73
  -2  14   8   31.36    1.84
  -2  14   8   25.10    1.90
   2  14  -8   26.65    1.88
  -2 -14   7   -0.14    0.36
  -2  14   7   -0.10    0.44
  -2  14   7    0.24    0.63
   2  14  -7   -0.01    0.47
  -2 -14   6   25.85    1.62
  -2  14   6   27.16    1.71
  -2  14   6   25.21    1.82
   2  14  -6   31.30    1.98
  -2 -14   5    0.20    0.37
  -2  14   5    0.42    0.48
  -2  14   5    0.38    0.59
   2  14  -5   -0.29    0.41
  -2 -14   4   22.99    1.39
  -2  14   4   29.14    1.78
  -2  14   4   26.35    1.69
   2  14  -4   27.38    1.82
  -2  14   3    0.88    0.55
  -2  14   3    0.68    0.53
   2  14  -3    0.77    0.55
  -2  14   2    2.84    0.75
  -2  14   2    2.32    0.64
   2  14  -2    2.51    0.72
  -2  14   1   -0.02    0.37
  -2  14   1   -0.23    0.40
   2  14  -1   -0.01    0.36
   2  14  -1    0.73    0.38
  -2  14   0    0.52    0.48
   2  14   0    0.20    0.40
   2  14   0    0.25    0.37
  -2  14  -1    0.56    0.54
   2  14   1    0.48    0.50
   2  14   1    1.46    0.57
  -2  14  -2    9.39    1.17
   2  14   2    9.88    1.15
   2  14   2    8.89    1.03
  -2  14  -3    0.86    0.58
   2  14   3    0.85    0.53
   2  14   3    0.33    0.49
  -2  14  -4   18.45    1.60
   2 -14   4   17.70    1.45
   2  14   4   18.30    1.51
   2  14   4   16.92    1.45
  -2  14  -5    0.32    0.55
   2 -14   5    0.04    0.48
   2  14   5    0.14    0.47
   2  14   5    0.30    0.56
  -2  14  -6   37.29    2.24
   2 -14   6   25.06    1.77
   2  14   6   31.20    1.93
   2  14   6   33.53    2.10
  -2  14  -7    0.61    0.64
   2 -14   7   -0.09    0.50
   2  14   7    0.49    0.55
   2  14   7    0.62    0.65
  -2  14  -8   28.72    2.05
   2 -14   8   22.46    1.82
   2  14   8   37.65    2.15
   2  14   8   25.41    1.99
  -2  14  -9    0.11    0.57
   2 -14   9   -0.12    0.55
   2  14   9    0.26    0.54
   2  14   9    0.45    0.68
  -2  14 -10   15.76    1.66
   2 -14  10   13.61    1.63
   2  14  10   16.08    1.74
  -2  14 -11    1.27    0.80
   2 -14  11    0.49    0.65
   2  14  11    1.87    0.91
  -2  14 -12   14.96    1.69
   2 -14  12   11.03    1.60
   2  14  12   13.00    1.79
  -2  14 -13    0.01    0.63
   2 -14  13    0.09    0.67
   2  14  13    0.62    0.80
   2 -14  14    5.88    1.36
   2  14  14    8.50    1.59
   2 -14  15    0.23    0.80
   2  14  15    0.34    0.82
   2 -14  16    1.46    0.98
   2  14  16    2.28    1.24
  -2 -15  16   -0.65    0.63
  -2  15  16   -0.05    0.89
  -2 -15  15    4.98    1.31
  -2  15  15    5.48    1.48
  -2 -15  14    0.07    0.66
  -2  15  14    0.79    0.90
  -2 -15  13    4.67    1.20
  -2  15  13    6.01    1.39
  -2 -15  12    0.09    0.58
  -2  15  12    1.04    0.85
   2  15 -12    0.78    0.74
  -2 -15  11    8.29    1.33
  -2  15  11   11.40    1.65
   2  15 -11   11.01    1.51
  -2 -15  10    0.41    0.61
  -2  15  10    0.69    0.79
   2  15 -10    0.43    0.59
  -2 -15   9    2.08    0.80
  -2  15   9    3.37    1.07
   2  15  -9    5.04    1.09
  -2 -15   8    4.01    0.91
  -2  15   8    4.11    0.90
  -2  15   8    4.05    1.01
   2  15  -8    3.37    0.92
  -2 -15   7    1.80    0.68
  -2  15   7    1.97    0.69
  -2  15   7    1.38    0.82
   2  15  -7    3.06    0.88
  -2 -15   6   -0.38    0.34
  -2  15   6   -0.02    0.46
  -2  15   6   -0.11    0.57
   2  15  -6    0.15    0.49
  -2 -15   5    0.39    0.42
  -2  15   5    0.40    0.50
  -2  15   5   -0.09    0.57
   2  15  -5    0.30    0.51
  -2  15   4    1.11    0.61
  -2  15   4    0.72    0.60
   2  15  -4    0.83    0.59
  -2  15   3    0.05    0.44
  -2  15   3    0.59    0.56
   2  15  -3    0.87    0.60
  -2  15   2    1.13    0.62
  -2  15   2    0.76    0.57
   2  15  -2    0.64    0.56
  -2  15   1    1.25    0.67
   2  15  -1   -0.18    0.40
  -2  15   0    2.18    0.76
   2  15   0    3.15    0.81
   2  15   0    2.83    0.66
  -2  15  -1    0.55    0.57
   2  15   1    0.10    0.45
   2  15   1    0.57    0.48
  -2  15  -2    2.32    0.81
   2  15   2    1.46    0.65
   2  15   2    1.89    0.65
  -2  15  -4    1.48    0.72
   2 -15   4    1.59    0.71
   2  15   4    1.26    0.64
   2  15   4    1.27    0.66
  -2  15  -5    2.68    0.88
   2 -15   5    2.44    0.78
   2  15   5    1.90    0.71
   2  15   5    2.64    0.82
  -2  15  -6    0.86    0.67
   2 -15   6    0.56    0.62
   2  15   6    0.66    0.57
   2  15   6    0.84    0.63
  -2  15  -7   12.62    1.57
   2 -15   7   10.43    1.35
   2  15   7   11.73    1.35
   2  15   7   10.73    1.40
  -2  15  -8    6.20    1.19
   2 -15   8    3.53    0.96
   2  15   8    5.70    1.08
   2  15   8    6.83    1.25
  -2  15  -9    5.75    1.19
   2 -15   9    6.50    1.21
   2  15   9    6.72    1.19
   2  15   9    5.99    1.24
  -2  15 -10    0.73    0.73
   2 -15  10    0.67    0.74
   2  15  10    1.55    0.88
  -2  15 -11   27.31    2.18
   2 -15  11   19.15    1.92
   2  15  11   24.48    2.20
  -2  15 -12    0.93    0.82
   2 -15  12    0.18    0.66
   2  15  12   -0.35    0.70
  -2  15 -13   13.14    1.75
   2 -15  13    9.00    1.59
   2  15  13    8.65    1.61
   2 -15  14    0.08    0.77
   2  15  14    0.49    0.80
   2 -15  15    4.03    1.32
   2  15  15    4.01    1.35
   2 -15  16    0.05    0.84
   2  15  16    0.33    0.92
  -2 -16  16    4.40    1.37
  -2  16  16    3.92    1.40
  -2 -16  15    0.67    0.81
  -2  16  15    0.15    0.93
  -2 -16  14   10.50    1.67
  -2  16  14    9.05    1.69
  -2 -16  13   -0.60    0.54
  -2  16  13   -0.35    0.66
  -2 -16  12   19.80    1.96
  -2  16  12   21.62    2.16
   2  16 -12   25.16    2.09
  -2 -16  11    0.05    0.59
  -2  16  11    0.49    0.83
   2  16 -11    0.78    0.67
  -2 -16  10   17.91    1.73
  -2  16  10   20.85    2.02
   2  16 -10   23.70    1.97
  -2 -16   9    1.04    0.70
  -2  16   9    1.28    0.84
   2  16  -9    1.50    0.81
  -2 -16   8   26.01    1.89
  -2  16   8   29.02    2.17
   2  16  -8   30.87    2.17
  -2 -16   7    0.23    0.47
  -2  16   7    0.31    0.52
  -2  16   7    0.44    0.68
   2  16  -7    0.29    0.58
  -2  16   6   31.84    2.01
  -2  16   6   27.30    1.97
   2  16  -6   28.72    2.05
  -2  16   5    1.21    0.68
  -2  16   5    2.03    0.79
   2  16  -5    1.53    0.73
  -2  16   4   19.69    1.62
  -2  16   4   18.30    1.53
   2  16  -4   19.62    1.71
  -2  16   3    0.59    0.56
  -2  16   3    0.36    0.55
   2  16  -3    0.27    0.51
  -2  16   2    7.53    1.16
   2  16  -2    7.46    1.18
  -2  16   1    2.83    0.83
   2  16  -1    1.98    0.75
  -2  16   0   -0.30    0.43
   2  16   0    0.23    0.49
  -2  16  -1    0.13    0.49
   2  16   1    1.08    0.63
   2  16   1    1.77    0.63
  -2  16  -2    0.16    0.56
   2  16   2    0.18    0.44
   2  16   2    0.72    0.52
  -2  16  -3    0.82    0.58
   2  16   3    0.63    0.54
   2  16   3   -0.01    0.48
  -2  16  -4    9.99    1.40
   2  16   4   10.56    1.26
   2  16   4    9.71    1.24
  -2  16  -5    1.04    0.73
   2 -16   5    1.20    0.70
   2  16   5    0.44    0.58
   2  16   5    1.29    0.71
  -2  16  -6   10.50    1.50
   2 -16   6    8.46    1.26
   2  16   6    9.78    1.33
   2  16   6    9.17    1.31
  -2  16  -7    0.69    0.69
   2 -16   7    0.33    0.57
   2  16   7    0.54    0.61
   2  16   7    0.85    0.69
  -2  16  -8    9.38    1.46
   2 -16   8    7.17    1.24
   2  16   8    8.13    1.33
  -2  16  -9    1.14    0.81
   2 -16   9    1.85    0.87
   2  16   9    1.72    0.80
   2  16   9    1.54    0.90
  -2  16 -10    7.86    1.41
   2 -16  10    5.45    1.23
   2  16  10    6.50    1.34
  -2  16 -11    2.13    0.97
   2 -16  11    2.65    1.03
   2  16  11    3.74    1.18
  -2  16 -12    5.40    1.29
   2 -16  12    4.02    1.23
   2  16  12    5.04    1.33
  -2  16 -13    2.33    1.02
   2 -16  13   -0.17    0.72
   2  16  13    1.25    0.98
   2 -16  14    3.98    1.31
   2  16  14    4.85    1.37
   2 -16  15    0.25    0.87
   2  16  15    1.77    1.03
  -2 -17  15    3.28    1.26
  -2  17  15    6.50    1.60
  -2 -17  14   -0.02    0.73
  -2  17  14    0.60    1.04
  -2 -17  13    3.14    1.14
  -2  17  13    2.46    1.13
  -2 -17  12    0.05    0.66
  -2  17  12   -0.28    0.75
   2  17 -12    0.68    0.81
  -2 -17  11    6.41    1.27
  -2  17  11    5.34    1.35
   2  17 -11    8.58    1.48
  -2 -17  10    1.18    0.78
  -2  17  10    1.57    0.92
   2  17 -10    1.50    0.83
  -2 -17   9    0.58    0.66
  -2  17   9    1.77    0.93
   2  17  -9    1.66    0.86
  -2 -17   8    1.78    0.76
  -2  17   8    1.36    0.84
   2  17  -8    2.78    0.94
  -2  17   7    1.83    0.77
  -2  17   7    0.18    0.71
   2  17  -7    1.55    0.79
  -2  17   6    3.91    0.97
  -2  17   6    3.40    0.98
   2  17  -6    4.27    1.04
  -2  17   5   -0.01    0.50
  -2  17   5    0.13    0.61
   2  17  -5    0.39    0.59
  -2  17   4   16.34    1.56
  -2  17   4   18.58    1.61
   2  17  -4   15.32    1.59
  -2  17   3    0.77    0.57
   2  17  -3    1.75    0.75
  -2  17   2   16.33    1.59
   2  17  -2   14.18    1.53
  -2  17   1    0.74    0.64
   2  17  -1    1.16    0.68
  -2  17   0   20.72    1.77
   2  17   0   23.34    1.87
  -2  17  -1    0.27    0.54
   2  17   1    0.39    0.55
  -2  17  -2   25.13    1.97
   2  17   2   28.42    2.05
   2  17   2   24.64    1.72
  -2  17  -3    1.45    0.72
   2  17   3    0.80    0.60
   2  17   3    0.73    0.57
  -2  17  -4   22.36    1.92
   2  17   4   23.26    1.87
   2  17   4   22.96    1.78
  -2  17  -5    4.92    1.17
   2 -17   5    5.26    1.05
   2  17   5    3.65    0.96
   2  17   5    4.22    1.01
  -2  17  -6   19.15    1.86
   2 -17   6   15.00    1.60
   2  17   6   21.10    1.81
   2  17   6   16.77    1.67
  -2  17  -7    6.20    1.28
   2 -17   7    5.32    1.13
   2  17   7    7.27    1.26
   2  17   7    5.46    1.14
  -2  17  -8    8.43    1.45
   2 -17   8    6.41    1.24
   2  17   8    8.83    1.38
   2  17   8   11.21    1.57
  -2  17  -9   11.37    1.66
   2 -17   9    7.66    1.36
   2  17   9   10.39    1.52
   2  17   9    8.07    1.46
  -2  17 -10    5.34    1.32
   2 -17  10    3.73    1.13
   2  17  10    5.42    1.29
  -2  17 -11   15.00    1.85
   2 -17  11   11.49    1.66
   2  17  11   17.50    1.94
  -2  17 -12    4.70    1.31
   2 -17  12    4.08    1.26
   2  17  12    5.74    1.38
  -2  17 -13    8.70    1.57
   2 -17  13    5.94    1.42
   2  17  13    7.99    1.66
   2 -17  14    1.58    1.06
   2  17  14    0.82    1.01
  -2 -18  14    7.45    1.56
  -2  18  14    6.98    1.61
  -2 -18  13   -0.04    0.74
  -2  18  13    0.35    0.92
  -2 -18  12    7.65    1.47
  -2  18  12    9.00    1.64
   2  18 -12   12.14    1.75
  -2 -18  11    0.47    0.75
  -2  18  11    1.50    1.00
   2  18 -11    1.86    1.00
  -2 -18  10   11.60    1.58
  -2  18  10   12.97    1.80
   2  18 -10   13.44    1.67
  -2  18   9    2.29    1.03
   2  18  -9    2.40    0.97
  -2  18   8   15.57    1.76
   2  18  -8   18.42    1.86
  -2  18   7    0.46    0.60
  -2  18   7    1.30    0.81
   2  18  -7    0.58    0.71
  -2  18   6    9.53    1.37
  -2  18   6    7.46    1.28
   2  18  -6    9.02    1.42
  -2  18   5    1.62    0.78
  -2  18   5    0.50    0.69
   2  18  -5    0.71    0.71
  -2  18   4    9.46    1.36
   2  18  -4    6.66    1.26
  -2  18   3    1.17    0.69
   2  18  -3    2.19    0.84
  -2  18   2    0.02    0.48
   2  18  -2    0.49    0.59
  -2  18   1   -0.19    0.46
   2  18  -1    0.37    0.63
  -2  18   0    0.16    0.56
   2  18   0    0.06    0.48
  -2  18  -1    0.65    0.65
   2  18   1    0.74    0.68
  -2  18  -2    4.40    1.07
   2  18   2    6.98    1.26
  -2  18  -4   12.44    1.63
   2  18   4   11.01    1.50
   2  18   4   11.52    1.39
  -2  18  -5   13.44    1.74
   2  18   5   10.66    1.46
   2  18   5   11.15    1.45
  -2  18  -6   13.26    1.65
   2 -18   6   13.63    1.59
   2  18   6   12.93    1.54
   2  18   6   11.89    1.55
  -2  18  -7    4.06    1.15
   2 -18   7    4.84    1.14
   2  18   7    4.25    1.09
   2  18   7    4.05    1.11
  -2  18  -8   16.02    1.85
   2 -18   8   11.27    1.56
   2  18   8   17.74    1.80
   2  18   8   14.57    1.74
  -2  18  -9   11.43    1.71
   2 -18   9    9.34    1.50
   2  18   9    9.20    1.47
   2  18   9    7.87    1.46
  -2  18 -10    9.57    1.63
   2 -18  10    8.37    1.50
   2  18  10    9.50    1.64
  -2  18 -11    4.19    1.24
   2 -18  11    3.98    1.24
   2  18  11    4.23    1.30
  -2  18 -12    6.59    1.46
   2 -18  12    6.43    1.49
   2  18  12    6.92    1.57
  -2  18 -13    1.44    0.99
   2 -18  13    0.27    0.89
   2  18  13    0.96    0.97
  -2 -19  13    2.85    1.19
  -2  19  13    1.57    1.13
  -2  19  12    0.59    0.98
   2  19 -12    0.52    0.77
  -2  19  11    2.70    1.22
   2  19 -11    3.04    1.11
  -2  19  10    2.45    1.11
   2  19 -10    1.60    0.93
  -2  19   9    3.69    1.21
   2  19  -9    3.94    1.16
  -2  19   8    5.72    1.29
   2  19  -8    2.98    1.04
  -2  19   7    2.00    0.86
  -2  19   7    1.54    0.86
   2  19  -7    1.28    0.85
  -2  19   6   10.27    1.49
  -2  19   6    7.50    1.31
   2  19  -6    9.67    1.53
  -2  19   5    1.88    0.83
   2  19  -5    1.62    0.87
  -2  19   4   16.01    1.69
   2  19  -4   16.59    1.77
  -2  19   3    0.54    0.61
   2  19  -3    1.31    0.78
  -2  19   2   34.42    2.36
   2  19  -2   31.76    2.34
  -2  19   1    1.14    0.73
   2  19  -1    0.89    0.71
  -2  19   0   17.75    1.78
   2  19   0   17.39    1.77
  -2  19  -1    1.81    0.84
   2  19   1    2.87    0.92
  -2  19  -2   29.24    2.27
   2  19   2   29.68    2.25
  -2  19  -3    1.91    0.88
   2  19   3    1.96    0.84
  -2  19  -4   23.03    2.07
   2  19   4   23.41    2.02
   2  19   4   23.10    1.89
  -2  19  -5    6.15    1.31
   2  19   5    4.38    1.09
   2  19   5    3.15    0.95
  -2  19  -6   12.96    1.76
   2  19   6   11.52    1.59
   2  19   6   13.13    1.64
  -2  19  -7    5.09    1.29
   2  19   7    3.84    1.11
   2  19   7    5.67    1.28
  -2  19  -8    6.50    1.39
   2 -19   8    3.97    1.18
   2  19   8    5.80    1.28
   2  19   8    4.79    1.22
  -2  19  -9    4.51    1.28
   2 -19   9    5.61    1.32
   2  19   9    6.86    1.44
  -2  19 -10    1.20    0.98
   2 -19  10    1.82    1.07
   2  19  10    1.56    1.00
  -2  19 -11    8.80    1.64
   2 -19  11    6.55    1.50
   2  19  11    8.17    1.63
  -2  19 -12   -0.12    0.85
   2 -19  12    0.22    0.88
   2  19  12    0.03    0.84
  -2  20  12    2.83    1.27
   2  20 -12    3.52    1.21
  -2  20  11    3.34    1.28
   2  20 -11    1.85    1.02
  -2  20  10    4.20    1.33
   2  20 -10    4.22    1.23
  -2  20   9    3.40    1.16
   2  20  -9    1.02    0.89
  -2  20   8    4.97    1.28
   2  20  -8    5.53    1.32
  -2  20   7    1.29    0.86
   2  20  -7    2.19    0.98
  -2  20   6    3.97    1.12
   2  20  -6    4.61    1.23
  -2  20   5    3.56    1.09
   2  20  -5    4.54    1.21
  -2  20   4    2.43    0.95
   2  20  -4    1.48    0.87
  -2  20   2    1.21    0.75
   2  20  -2    1.26    0.83
  -2  20   1    0.13    0.54
   2  20  -1   -0.43    0.56
  -2  20   0   -0.06    0.55
   2  20   0    0.04    0.61
  -2  20  -1    0.53    0.69
   2  20   1    0.71    0.73
  -2  20  -2    0.11    0.62
   2  20   2    0.46    0.65
  -2  20  -3    8.67    1.50
   2  20   3    7.28    1.35
  -2  20  -4    0.74    0.78
   2  20   4    1.02    0.76
  -2  20  -5    8.78    1.58
   2  20   5    7.61    1.39
   2  20   5    6.98    1.28
  -2  20  -6    1.11    0.90
   2  20   6    0.90    0.79
   2  20   6    0.90    0.78
  -2  20  -7    5.97    1.43
   2  20   7    5.11    1.24
   2  20   7    6.20    1.33
  -2  20  -8   -0.02    0.78
   2  20   8   -0.14    0.68
   2  20   8    0.73    0.81
  -2  20  -9    3.39    1.21
   2  20   9    3.70    1.22
  -2  20 -10    1.27    0.96
   2 -20  10    0.60    0.93
   2  20  10    0.51    0.91
   2 -20  11    1.47    1.10
   2  20  11    3.74    1.34
  -2  21  11    0.49    0.98
  -2  21  10    4.63    1.38
  -2  21   9    0.92    0.97
   2  21  -9    2.14    1.06
  -2  21   8   12.70    1.78
   2  21  -8   10.24    1.73
   2  21  -7    3.02    1.13
  -2  21   6   18.70    1.95
   2  21  -6   22.34    2.20
  -2  21   5    3.33    1.04
   2  21  -5    2.47    1.06
  -2  21   4   33.70    2.51
   2  21  -4   32.68    2.56
  -2  21   3    1.82    0.89
   2  21  -3    1.57    0.93
  -2  21   2   44.01    2.85
   2  21  -2   40.88    2.81
  -2  21   1    6.51    1.35
   2  21  -1    5.95    1.32
  -2  21   0   29.37    2.39
   2  21   0   31.14    2.46
  -2  21  -1    4.21    1.18
   2  21   1    4.85    1.22
  -2  21  -2   33.56    2.60
   2  21   2   32.60    2.51
  -2  21  -3    1.92    0.98
   2  21   3    1.90    0.95
  -2  21  -4   21.80    2.19
   2  21   4   22.10    2.12
  -2  21  -5    1.11    0.88
   2  21   5    1.45    0.85
  -2  21  -6   13.37    1.93
   2  21   6   12.02    1.73
   2  21   6   10.49    1.60
  -2  21  -7    0.56    0.89
   2  21   7    1.80    1.01
   2  21   7    2.26    1.05
  -2  21  -8    2.91    1.15
   2  21   8    4.40    1.24
   2  21   8    4.08    1.23
   2  21   9    1.51    1.01
   2  21  10    2.29    1.15
  -2  22   6    1.68    0.95
   2  22  -6    1.01    0.96
  -2  22   5    0.91    0.85
   2  22  -5    0.98    0.95
  -2  22   4    0.74    0.81
   2  22  -4    0.61    0.85
  -2  22   3    1.28    0.88
  -2  22   2    1.92    0.98
   2  22  -2    1.82    0.96
  -2  22   1   -0.28    0.67
   2  22  -1   -0.07    0.68
  -2  22   0    1.14    0.88
   2  22   0    1.58    0.95
  -2  22  -1    0.49    0.75
   2  22   1    0.22    0.72
  -2  22  -2    0.25    0.71
   2  22   2   -0.05    0.68
   2  22   3    2.39    1.01
  -2  22  -4    0.61    0.85
   2  22   4    0.29    0.73
  -2  22  -5    4.44    1.34
   2  22   5    2.31    1.06
   2  22   6   -0.03    0.67
   2  22   7    1.86    1.07
   2  22   7    3.04    1.16
   2  22   8   -0.03    0.80
  -2  23   6   16.06    1.98
  -2  23   5   -0.02    0.73
  -2  23   4   25.37    2.39
  -2  23   3    0.04    0.77
  -2  23   2   32.29    2.66
  -2  23   1    0.48    0.75
   2  23  -1    0.80    0.83
  -2  23   0   29.18    2.54
   2  23   0   29.43    2.58
  -2  23  -1    0.31    0.81
   2  23   1    1.18    0.87
   2  23   2   23.57    2.34
   2  23   3    0.55    0.77
   2  23   4   15.67    2.08
  -3   0  21    0.21    0.87
  -3   0  20    4.67    1.32
  -3   0  19   -0.30    0.64
  -3   0  18    5.70    1.28
  -3   0  17    0.34    0.58
  -3   0  16   12.82    1.56
  -3   0  16   14.06    1.56
  -3   0  15   -0.66    0.51
  -3   0  15   -0.03    0.50
  -3   0  14   11.23    1.34
  -3   0  14    9.47    1.23
  -3   0  13    0.10    0.50
  -3   0  13   -0.15    0.37
  -3   0  12    9.48    1.14
  -3   0  12   11.21    1.15
  -3   0  11    0.17    0.50
  -3   0  11    0.06    0.35
  -3   0  10    9.55    0.98
  -3   0  10    8.32    0.92
  -3   0   9    0.17    0.35
  -3   0   9   -0.40    0.20
  -3   0   8    7.49    0.80
  -3   0   7    0.05    0.29
  -3   0   6    6.67    0.63
  -3   0   5    0.18    0.20
  -3   0   4    4.55    0.47
  -3   0   3    0.02    0.10
  -3   0   3   -0.01    0.11
  -3   0   2    5.53    0.35
  -3   0   2    5.75    0.43
  -3   0   1    0.15    0.12
  -3   0   0   32.23    0.91
  -3   0  -1    0.01    0.14
  -3   0  -2   16.00    0.78
  -3   0  -3    0.12    0.20
   3   0   3   -0.25    0.15
   3   0   3   -0.06    0.24
   3   0   4   41.73    1.25
   3   0   4   43.23    1.33
  -3   0  -5   -0.11    0.22
   3   0   5   -0.03    0.19
   3   0   5    0.11    0.26
  -3   0  -6   69.85    1.92
   3   0   6   90.90    2.07
   3   0   6   81.86    2.07
  -3   0  -7    0.21    0.35
   3   0   7    0.40    0.35
   3   0   7    0.43    0.32
  -3   0  -8   76.33    2.20
   3   0   8   98.93    2.44
   3   0   8   87.29    2.43
  -3   0  -9   -0.04    0.39
   3   0   9   -0.22    0.34
   3   0   9   -0.02    0.32
  -3   0 -10   37.55    1.75
   3   0  10   28.33    1.53
   3   0  10   22.51    1.46
  -3   0 -11   -0.11    0.53
   3   0  11    0.51    0.49
   3   0  11   -0.27    0.39
  -3   0 -12   39.15    1.93
   3   0  12   44.58    2.05
   3   0  12   37.03    2.02
   3   0  13   -0.55    0.40
   3   0  13    0.19    0.54
   3   0  14   11.94    1.40
   3   0  15   -0.16    0.60
   3   0  16   12.07    1.56
   3   0  17    0.04    0.69
   3   0  18    0.98    0.87
  -3  -1  21    2.95    1.22
  -3   1  21    3.73    1.30
  -3  -1  20    0.00    0.70
  -3   1  20    0.20    0.72
  -3  -1  19    4.39    1.24
  -3   1  19    4.08    1.18
  -3  -1  18   -0.09    0.58
  -3   1  18   -0.09    0.56
  -3  -1  17    6.27    1.23
  -3   1  17    7.94    1.35
  -3   1  17    8.09    1.36
  -3  -1  16    0.56    0.60
  -3   1  16    0.09    0.70
  -3   1  16   -0.01    0.51
  -3  -1  15   24.55    1.78
  -3  -1  15   28.01    2.02
  -3   1  15   26.44    1.95
  -3   1  15   29.33    2.04
  -3  -1  14   -0.08    0.51
  -3  -1  14   -0.13    0.39
  -3   1  14    0.41    0.59
  -3   1  14   -0.09    0.38
  -3  -1  13   13.52    1.29
  -3  -1  13   13.32    1.31
  -3   1  13   14.79    1.45
  -3   1  13   13.59    1.29
  -3  -1  12    0.54    0.58
  -3  -1  12    0.26    0.43
  -3   1  12    0.44    0.55
  -3   1  12    0.08    0.40
  -3  -1  11   17.50    1.28
  -3  -1  11   18.90    1.39
  -3   1  11   18.96    1.41
  -3   1  11   16.80    1.28
  -3  -1  10    0.42    0.41
  -3  -1  10    0.17    0.35
  -3   1  10    0.57    0.47
  -3   1  10    0.05    0.33
  -3  -1   9    8.90    0.87
  -3  -1   9    9.30    0.91
  -3   1   9    8.41    0.90
  -3  -1   8    1.70    0.45
  -3   1   8    1.67    0.49
  -3  -1   7    7.50    0.68
  -3   1   7    7.52    0.77
  -3  -1   6    0.01    0.19
  -3   1   6   -0.16    0.20
   3   1  -6    0.03    0.12
  -3  -1   5   16.95    0.84
  -3   1   5   16.78    0.89
   3   1  -5   16.75    0.50
  -3  -1   4    1.49    0.29
  -3   1   4    0.98    0.28
   3   1  -4    1.28    0.20
  -3  -1   3   46.85    1.21
  -3  -1   3   39.63    0.84
  -3   1   3   38.21    0.74
  -3   1   3   46.07    1.26
  -3  -1   2    0.23    0.13
  -3  -1   2    0.20    0.11
  -3   1   2    0.44    0.16
  -3   1   2    0.39    0.17
  -3  -1   1  232.57    2.38
  -3   1   1  216.81    2.24
  -3   1   1  218.97    2.44
  -3  -1   0    2.34    0.30
  -3   1   0    1.77    0.29
  -3  -1  -1  233.40    2.67
  -3   1  -1  211.93    2.54
  -3  -1  -2    0.92    0.27
  -3   1  -2    0.84    0.29
  -3  -1  -3   69.02    1.63
  -3   1  -3   65.32    1.62
   3  -1   3   67.42    1.61
   3   1   3   65.35    1.54
   3   1   3   67.40    1.44
  -3  -1  -4    0.31    0.25
  -3   1  -4    0.24    0.28
   3  -1   4    0.16    0.18
   3  -1   4    0.10    0.25
   3   1   4    0.38    0.25
   3   1   4    0.45    0.29
  -3  -1  -5   68.52    1.80
  -3   1  -5   67.18    1.82
   3  -1   5   87.84    1.80
   3  -1   5   79.49    1.98
   3   1   5   87.13    2.00
   3   1   5   80.23    1.82
  -3  -1  -6    0.27    0.29
  -3   1  -6    0.17    0.35
   3  -1   6    0.20    0.26
   3  -1   6    0.66    0.36
   3   1   6    0.22    0.28
   3   1   6    0.20    0.29
  -3  -1  -7  169.57    3.06
  -3   1  -7  166.31    3.09
   3  -1   7  189.01    3.01
   3  -1   7  169.30    3.26
   3   1   7  185.66    3.26
   3   1   7  170.27    3.06
  -3  -1  -8    0.19    0.36
  -3   1  -8    0.46    0.43
   3  -1   8    0.21    0.32
   3  -1   8    0.35    0.36
   3   1   8    0.25    0.36
   3   1   8    0.12    0.31
  -3  -1  -9   27.55    1.44
  -3   1  -9   30.82    1.55
   3  -1   9   32.09    1.46
   3  -1   9   25.41    1.48
   3   1   9   33.69    1.62
   3   1   9   28.97    1.50
  -3  -1 -10    1.46    0.60
  -3   1 -10    2.11    0.71
   3  -1  10    2.31    0.57
   3  -1  10    1.87    0.64
   3   1  10    2.22    0.62
   3   1  10    2.44    0.66
  -3  -1 -11   16.61    1.32
  -3   1 -11   17.42    1.38
   3  -1  11   19.83    1.32
   3  -1  11   15.76    1.35
   3   1  11   18.88    1.37
   3   1  11   15.78    1.30
  -3  -1 -12    0.30    0.61
  -3   1 -12    1.38    0.74
   3  -1  12    1.68    0.62
   3  -1  12    1.48    0.67
   3   1  12    0.91    0.62
   3   1  12    0.54    0.57
   3  -1  13    2.11    0.81
   3   1  13    3.39    0.84
   3   1  13    3.76    0.90
   3  -1  14    2.07    0.82
   3   1  14    3.11    0.85
   3   1  14    1.73    0.78
   3  -1  16   -0.59    0.56
   3   1  16   -0.18    0.62
   3  -1  17   -0.58    0.60
   3   1  17   -0.88    0.57
   3  -1  18    0.53    0.86
   3  -1  19   -0.30    0.77
  -3  -2  21    0.53    0.87
  -3  -2  20    3.08    1.24
  -3   2  20    3.61    1.19
  -3  -2  19    0.58    0.71
  -3   2  19    0.15    0.69
  -3  -2  18    9.15    1.51
  -3   2  18   10.86    1.60
  -3   2  18   10.15    1.51
  -3  -2  17    0.05    0.55
  -3   2  17    0.49    0.77
  -3   2  17   -0.07    0.54
  -3  -2  16    9.58    1.40
  -3   2  16    6.91    1.30
  -3   2  16    9.13    1.34
  -3  -2  15    4.95    1.06
  -3   2  15    6.25    1.18
  -3   2  15    7.30    1.17
  -3  -2  14   12.35    1.31
  -3  -2  14   11.62    1.33
  -3   2  14   11.38    1.35
  -3   2  14   11.02    1.25
  -3  -2  13    0.63    0.58
  -3  -2  13    0.66    0.49
  -3   2  13    0.49    0.56
  -3   2  13    0.19    0.40
  -3  -2  12    6.14    0.91
  -3  -2  12    5.96    0.94
  -3   2  12    6.71    1.04
  -3   2  12    7.05    0.97
  -3  -2  11    6.00    0.82
  -3  -2  11    6.89    0.96
  -3   2  11    7.77    1.02
  -3   2  11    6.29    0.89
  -3  -2  10    1.56    0.52
  -3  -2  10    1.56    0.53
  -3   2  10    1.74    0.60
  -3  -2   9    3.17    0.56
  -3  -2   9    3.33    0.64
  -3   2   9    3.70    0.69
   3   2  -9    3.77    0.40
  -3  -2   8    0.76    0.37
  -3  -2   8    0.05    0.27
  -3   2   8    0.77    0.43
   3   2  -8    0.49    0.21
  -3  -2   7    1.63    0.36
  -3   2   7    1.64    0.46
   3   2  -7    2.71    0.34
  -3  -2   6    0.19    0.19
  -3   2   6   -0.23    0.23
   3   2  -6   -0.01    0.14
  -3  -2   5    1.37    0.30
  -3   2   5    1.11    0.33
   3   2  -5    1.48    0.24
  -3   2   4    1.66    0.34
   3   2  -4    1.49    0.25
  -3  -2   3  101.76    1.77
  -3   2   3   91.37    1.27
  -3   2   3   88.34    1.79
   3   2  -3   93.85    1.47
  -3   2   2    2.24    0.31
  -3   2   2    2.23    0.32
   3   2  -2    1.92    0.28
  -3   2   1    0.00    0.19
  -3   2   1   -0.04    0.13
   3   2  -1    0.17    0.17
  -3  -2   0   19.70    0.78
  -3  -2   0   19.60    0.77
  -3   2   0   18.58    0.79
  -3   2   0   19.77    0.71
  -3  -2  -1   32.01    1.03
  -3  -2  -1   29.80    0.99
  -3   2  -1   27.69    1.01
  -3  -2  -2    9.40    0.63
  -3   2  -2    9.45    0.71
   3   2   2    9.81    0.63
  -3  -2  -3   12.40    0.74
  -3   2  -3   12.12    0.82
   3  -2   3   12.48    0.79
   3   2   3   11.65    0.72
   3   2   4   31.86    1.23
   3   2   4   29.26    0.99
  -3  -2  -5    0.82    0.31
  -3   2  -5    0.41    0.33
   3  -2   5    0.45    0.24
   3  -2   5    0.92    0.38
   3   2   5    1.02    0.37
   3   2   5    0.84    0.31
  -3  -2  -6   47.82    1.60
  -3   2  -6   42.77    1.59
   3  -2   6   60.50    1.52
   3  -2   6   52.10    1.79
   3   2   6   57.79    1.82
   3   2   6   53.60    1.57
  -3  -2  -7    0.05    0.31
  -3   2  -7    0.09    0.38
   3  -2   7    0.23    0.27
   3  -2   7    0.45    0.35
   3   2   7    0.75    0.40
   3   2   7    0.18    0.30
  -3  -2  -8   51.64    1.81
  -3   2  -8   51.30    1.89
   3  -2   8   70.48    1.88
   3  -2   8   56.94    2.09
   3   2   8   63.18    2.12
   3   2   8   61.63    1.93
  -3  -2  -9    4.73    0.73
  -3   2  -9    5.06    0.84
   3  -2   9    5.98    0.70
   3  -2   9    4.37    0.76
   3   2   9    3.81    0.69
   3   2   9    4.15    0.67
  -3  -2 -10   41.14    1.79
  -3   2 -10   43.46    1.94
   3  -2  10   25.86    1.35
   3  -2  10   19.71    1.45
   3   2  10   25.02    1.54
   3   2  10   23.40    1.42
  -3  -2 -11    0.43    0.52
  -3   2 -11    0.33    0.59
   3  -2  11    0.00    0.39
   3  -2  11    0.83    0.54
   3   2  11    0.47    0.51
   3   2  11   -0.13    0.38
  -3  -2 -12   22.42    1.52
  -3   2 -12   21.14    1.58
   3  -2  12   21.20    1.64
   3   2  12   24.07    1.65
   3   2  12   21.93    1.54
   3  -2  13    0.93    0.68
   3   2  13    1.73    0.72
   3   2  13    1.32    0.69
   3  -2  14   13.24    1.51
   3   2  14   16.57    1.53
   3   2  14   12.91    1.41
   3  -2  15    0.18    0.66
   3   2  15   -0.16    0.59
   3   2  15    0.53    0.64
   3  -2  16    3.04    1.04
   3  -2  17   -0.13    0.70
   3  -2  18    1.04    0.94
   3  -2  19   -0.49    0.83
   3  -2  20   -0.34    0.91
  -3  -3  21    3.06    1.23
  -3  -3  20    0.40    0.82
  -3  -3  19    0.94    0.81
  -3   3  19    2.51    1.14
  -3   3  19    0.53    0.76
  -3  -3  18    2.26    0.96
  -3   3  18    3.32    1.15
  -3   3  18    1.48    0.87
  -3  -3  17    1.31    0.78
  -3   3  17    1.11    0.85
  -3   3  17    0.43    0.63
  -3  -3  16    1.92    0.88
  -3   3  16    2.90    1.00
  -3   3  16    3.38    0.96
  -3  -3  15   13.59    1.53
  -3   3  15   13.04    1.57
  -3   3  15   12.66    1.38
  -3  -3  14   10.80    1.33
  -3   3  14   12.59    1.47
  -3   3  14   11.02    1.25
  -3  -3  13    1.35    0.65
  -3  -3  13    1.78    0.69
  -3   3  13    2.60    0.84
  -3   3  13    1.72    0.63
  -3  -3  12    4.07    0.78
  -3  -3  12    4.97    0.90
  -3   3  12    5.62    0.99
  -3   3  12    3.94    0.79
  -3  -3  11   18.82    1.27
  -3  -3  11   17.44    1.36
  -3   3  11   20.37    1.52
  -3   3  11   18.90    1.33
  -3  -3  10    5.91    0.74
  -3  -3  10    5.12    0.82
  -3   3  10    6.10    0.88
  -3  -3   9   20.56    1.13
  -3  -3   9   23.66    1.41
  -3   3   9   24.30    1.46
   3   3  -9   26.87    0.96
  -3  -3   8    7.73    0.70
  -3  -3   8    7.51    0.82
  -3   3   8    7.52    0.90
   3   3  -8    9.60    0.63
  -3  -3   7    3.47    0.48
  -3  -3   7    3.53    0.56
  -3   3   7    3.62    0.60
   3   3  -7    4.42    0.45
  -3  -3   6    1.66    0.34
  -3   3   6    1.28    0.40
   3   3  -6    1.54    0.29
  -3  -3   5   24.91    0.96
  -3   3   5   27.74    0.65
  -3   3   5   21.04    1.10
   3   3  -5   23.05    0.82
  -3   3   4    4.28    0.35
  -3   3   4    3.85    0.51
   3   3  -4    4.50    0.42
  -3   3   3    0.49    0.24
  -3   3   3    0.91    0.28
   3   3  -3    0.85    0.24
  -3   3   2    2.15    0.35
  -3   3   2    2.19    0.35
   3   3  -2    2.31    0.33
  -3   3   1  214.93    2.50
  -3   3   1  222.62    2.56
   3   3  -1  240.23    2.77
  -3   3   0    0.19    0.26
  -3   3   0    0.04    0.12
   3   3   0    0.13    0.18
  -3  -3  -1   21.53    0.91
  -3  -3  -1   19.64    0.86
  -3   3  -1   19.32    0.92
  -3  -3  -2    3.41    0.44
  -3  -3  -2    3.55    0.44
  -3   3  -2    3.39    0.51
   3  -3   2    3.68    0.50
   3   3   2    3.38    0.44
  -3  -3  -3   74.58    1.77
  -3  -3  -3   67.42    1.68
  -3   3  -3   63.51    1.71
   3  -3   3   69.48    1.78
   3   3   3   64.51    1.69
  -3   3  -4    0.20    0.28
   3  -3   4    0.47    0.30
   3   3   4   -0.15    0.20
   3   3   4    0.40    0.23
  -3  -3  -5   54.46    1.65
  -3   3  -5   49.71    1.67
   3  -3   5   56.31    1.81
   3   3   5   51.78    1.70
   3   3   5   57.25    1.40
  -3  -3  -6    9.85    0.81
  -3   3  -6    8.55    0.88
   3  -3   6   11.01    0.65
   3  -3   6    9.24    0.86
   3   3   6   10.89    0.91
   3   3   6   10.58    0.74
  -3  -3  -7  112.61    2.54
  -3   3  -7  103.73    2.59
   3  -3   7  126.61    2.19
   3  -3   7  105.84    2.75
   3   3   7  115.04    2.79
   3   3   7  110.93    2.31
  -3  -3  -8    4.95    0.73
  -3   3  -8    5.00    0.81
   3  -3   8    4.43    0.55
   3  -3   8    4.20    0.73
   3   3   8    5.42    0.78
   3   3   8    5.45    0.68
  -3  -3  -9   14.75    1.11
  -3   3  -9   14.28    1.23
   3  -3   9   18.36    1.03
   3  -3   9   15.83    1.26
   3   3   9   17.88    1.31
   3   3   9   15.68    1.08
  -3   3 -10    1.54    0.66
   3  -3  10    1.02    0.46
   3  -3  10    1.11    0.58
   3   3  10    0.62    0.50
   3   3  10    1.15    0.53
  -3  -3 -11   11.37    1.13
  -3   3 -11   10.77    1.21
   3  -3  11   12.44    1.28
   3   3  11   12.43    1.24
   3   3  11   10.62    1.07
  -3   3 -12    2.15    0.79
   3  -3  12    0.84    0.63
   3   3  12    2.11    0.73
   3   3  12    1.28    0.61
   3  -3  13    1.29    0.74
   3   3  13    2.24    0.81
   3   3  13    0.80    0.65
   3  -3  14    4.01    1.06
   3   3  14    7.26    1.20
   3   3  14    6.48    1.10
   3  -3  15    5.56    1.19
   3   3  15    5.72    1.18
   3  -3  16    3.61    1.15
   3   3  16    5.48    1.20
   3  -3  17   -0.28    0.67
   3  -3  18    2.10    1.08
   3  -3  19   -0.52    0.76
   3  -3  20    1.94    1.27
  -3  -4  21    1.88    1.05
  -3  -4  20    3.54    1.25
  -3   4  20    4.49    1.39
  -3  -4  19    1.00    0.83
  -3   4  19    1.49    1.09
  -3  -4  18    2.61    1.03
  -3   4  18    3.90    1.20
  -3   4  18    5.34    1.20
  -3  -4  17    7.45    1.36
  -3   4  17    7.32    1.39
  -3   4  17    7.84    1.29
  -3  -4  16    1.75    0.83
  -3   4  16    3.72    1.12
  -3   4  16    1.96    0.78
  -3  -4  15   21.41    1.86
  -3   4  15   21.19    1.89
  -3   4  15   23.05    1.76
  -3  -4  14   10.95    1.36
  -3   4  14    9.94    1.39
  -3   4  14   12.70    1.33
  -3  -4  13   20.46    1.66
  -3   4  13   21.87    1.75
  -3   4  13   22.25    1.57
  -3  -4  12    1.50    0.57
  -3  -4  12    0.72    0.50
  -3   4  12    1.39    0.66
  -3   4  12    1.16    0.53
  -3  -4  11   63.26    2.08
  -3  -4  11   69.87    2.69
  -3   4  11   67.21    2.64
  -3  -4  10    3.65    0.62
  -3  -4  10    2.89    0.67
  -3   4  10    4.12    0.84
  -3  -4   9   13.15    0.91
  -3  -4   9   12.25    1.05
  -3   4   9   16.24    1.29
   3   4  -9   16.15    0.85
  -3  -4   8    0.24    0.27
  -3  -4   8   -0.02    0.21
  -3   4   8   -0.03    0.40
   3   4  -8    0.13    0.26
  -3  -4   7  249.94    3.26
  -3  -4   7  214.12    3.77
  -3   4   7  213.76    3.79
   3   4  -7  271.31    3.16
  -3  -4   6    2.19    0.36
  -3  -4   6    1.41    0.40
  -3   4   6    2.27    0.28
  -3   4   6    1.81    0.47
   3   4  -6    2.15    0.39
  -3  -4   5   20.01    0.85
  -3  -4   5   16.97    0.95
  -3   4   5   22.59    0.72
  -3   4   5   17.89    1.07
   3   4  -5   18.58    0.84
  -3  -4   4    0.57    0.20
  -3   4   4    0.17    0.18
  -3   4   4    0.36    0.27
   3   4  -4    0.17    0.20
  -3   4   3   26.99    0.90
  -3   4   3   25.34    1.06
   3   4  -3   27.69    1.00
  -3   4   2   10.98    0.67
  -3   4   2   11.29    0.69
   3   4  -2   11.39    0.68
  -3   4   1  229.83    2.78
  -3   4   1  228.62    2.69
   3   4  -1  243.26    3.00
  -3   4   0    5.57    0.62
  -3   4   0    5.71    0.43
   3   4   0    5.85    0.55
  -3   4  -1   15.79    0.90
   3   4   1   17.90    0.89
   3   4   1   16.20    0.83
  -3   4  -2    6.61    0.71
   3  -4   2    6.70    0.67
   3   4   2    6.64    0.59
   3   4   2    6.15    0.60
  -3  -4  -3   14.63    0.85
  -3  -4  -3   14.33    0.84
  -3   4  -3   14.72    0.96
   3  -4   3   15.82    0.95
   3   4   3   15.63    0.92
  -3   4  -4   28.85    1.29
   3   4   4   17.99    1.03
  -3  -4  -5    3.52    0.54
  -3   4  -5    3.28    0.60
   3  -4   5    3.57    0.60
   3   4   5    2.48    0.50
   3   4   5    3.32    0.42
  -3  -4  -6   15.39    0.99
  -3   4  -6   14.21    1.08
   3  -4   6   14.28    1.07
   3   4   6   14.28    1.03
   3   4   6   15.73    0.82
  -3  -4  -7    5.07    0.70
  -3   4  -7    4.05    0.73
   3  -4   7    4.77    0.74
   3   4   7    5.41    0.76
   3   4   7    5.10    0.59
  -3  -4  -8   28.16    1.39
  -3   4  -8   25.28    1.48
   3  -4   8   34.19    1.17
   3  -4   8   27.76    1.58
   3   4   8   30.42    1.61
   3   4   8   29.05    1.27
  -3  -4  -9    7.47    0.88
  -3   4  -9    7.38    1.01
   3  -4   9    8.40    0.70
   3  -4   9    7.24    0.96
   3   4   9    8.71    1.03
   3   4   9    7.74    0.82
  -3  -4 -10   17.89    1.27
  -3   4 -10   17.64    1.40
   3  -4  10   12.51    1.25
   3   4  10   16.62    1.38
   3   4  10   15.07    1.12
  -3  -4 -11    0.06    0.44
  -3   4 -11    0.06    0.54
   3  -4  11    0.08    0.43
   3   4  11    0.63    0.54
   3   4  11    0.62    0.48
  -3   4 -12    7.41    1.13
   3  -4  12    7.36    1.15
   3   4  12    8.28    1.15
   3   4  12    7.88    1.00
   3  -4  13    1.81    0.81
   3   4  13    2.08    0.84
   3  -4  14    8.88    1.36
   3   4  14   11.39    1.45
   3  -4  15    1.58    0.85
   3   4  15    1.94    0.88
   3  -4  16    2.16    0.93
   3   4  16    1.25    0.91
   3  -4  17    0.04    0.74
   3   4  17    0.59    0.79
   3  -4  18    1.08    0.93
   3  -4  19    0.11    0.91
   3  -4  20   -0.10    0.98
  -3  -5  20    1.21    0.97
  -3   5  20    2.18    1.21
  -3  -5  19    2.63    1.09
  -3   5  19    2.01    1.17
  -3  -5  18    0.22    0.65
  -3   5  18    0.92    0.92
  -3  -5  17    3.68    1.10
  -3   5  17    3.63    1.16
  -3  -5  16    1.81    0.88
  -3   5  16    2.80    1.05
  -3   5  16    1.74    0.73
  -3  -5  15    3.28    0.98
  -3   5  15    2.82    1.03
  -3   5  15    3.75    0.90
  -3  -5  14   16.16    1.60
  -3   5  14   13.27    1.51
  -3   5  14   15.61    1.43
  -3  -5  13   13.06    1.41
  -3   5  13   14.07    1.48
  -3   5  13   13.44    1.27
  -3  -5  12    3.38    0.83
  -3   5  12    3.97    0.96
  -3   5  12    4.27    0.78
  -3  -5  11    0.51    0.41
  -3  -5  11    0.81    0.44
  -3   5  11    1.19    0.65
  -3  -5  10   13.82    1.00
  -3  -5  10   13.91    1.21
  -3   5  10   14.67    1.31
   3   5 -10   16.34    0.99
  -3  -5   9   -0.01    0.27
  -3  -5   9    0.22    0.28
  -3   5   9    0.18    0.45
   3   5  -9    0.29    0.30
  -3  -5   8    6.53    0.64
  -3  -5   8    6.52    0.79
  -3   5   8    7.17    0.89
   3   5  -8    7.48    0.70
  -3  -5   7    2.42    0.41
  -3  -5   7    1.99    0.48
  -3   5   7    1.84    0.29
  -3   5   7    1.56    0.53
   3   5  -7    1.99    0.42
  -3  -5   6    1.25    0.30
  -3  -5   6    0.88    0.35
  -3   5   6    1.28    0.27
  -3   5   6    0.39    0.37
   3   5  -6    1.25    0.36
  -3  -5   5   15.93    0.76
  -3  -5   5   14.86    0.91
  -3   5   5   19.67    0.78
  -3   5   5   13.62    0.96
   3   5  -5   15.90    0.86
  -3   5   4    0.89    0.36
  -3   5   3    6.38    0.54
  -3   5   3    6.89    0.68
   3   5  -3    6.14    0.57
  -3   5   2   10.08    0.69
  -3   5   2    9.76    0.68
   3   5  -2   10.27    0.71
  -3   5   1   96.63    1.95
  -3   5   1   92.64    1.78
   3   5  -1  106.40    2.13
  -3   5   0   -0.10    0.27
  -3   5   0    0.07    0.17
   3   5   0   -0.08    0.17
  -3   5  -1   13.74    0.91
  -3   5  -1   14.81    0.62
   3   5   1   15.48    0.88
   3   5   1   16.15    0.89
  -3   5  -2    2.78    0.52
   3  -5   2    3.01    0.51
   3   5   2    2.69    0.44
   3   5   2    2.18    0.42
  -3   5  -3   18.74    1.08
   3  -5   3   18.81    1.07
   3   5   3   19.52    1.04
   3   5   3   19.07    1.04
  -3  -5  -5   25.20    1.23
  -3  -5  -5   24.13    1.20
  -3   5  -5   24.83    1.34
   3  -5   5   26.22    1.35
   3   5   5   27.60    1.38
   3   5   5   25.44    0.84
  -3  -5  -6    0.11    0.25
  -3   5  -6    0.10    0.39
   3  -5   6    0.13    0.34
   3   5   6    0.25    0.34
   3   5   6   -0.19    0.22
  -3  -5  -7   48.84    1.78
  -3   5  -7   47.87    1.91
   3  -5   7   45.58    1.94
   3   5   7   50.13    2.01
   3   5   7   48.33    1.42
  -3  -5  -8    0.47    0.38
  -3   5  -8   -0.43    0.39
   3  -5   8   -0.23    0.35
   3   5   8    0.30    0.42
   3   5   8    0.32    0.32
  -3  -5  -9    7.85    0.88
  -3   5  -9    9.15    1.11
   3  -5   9    8.56    1.06
   3   5   9    9.20    1.09
   3   5   9    9.49    0.84
   3  -5  10    1.87    0.69
   3   5  10    1.78    0.68
   3   5  10    1.99    0.56
  -3  -5 -11    5.46    0.88
  -3   5 -11    4.34    0.93
   3  -5  11    4.65    0.97
   3   5  11    6.57    1.03
  -3   5 -12    6.05    1.08
   3  -5  12    3.38    0.92
   3   5  12    4.05    0.94
  -3   5 -13    1.70    0.81
   3  -5  13    0.72    0.70
   3   5  13    0.88    0.73
   3  -5  14    6.51    1.25
   3   5  14    8.47    1.33
   3  -5  15    0.58    0.73
   3   5  15    0.85    0.79
   3  -5  16    6.72    1.40
   3   5  16    9.51    1.50
   3  -5  17   -0.24    0.67
   3   5  17    0.88    0.84
   3  -5  18    6.17    1.49
   3   5  18    8.19    1.56
   3  -5  19    0.38    0.95
  -3  -6  20    1.41    0.98
  -3   6  20    2.08    1.22
  -3  -6  19    0.10    0.73
  -3   6  19    0.88    1.00
  -3  -6  18   -0.10    0.58
  -3   6  18    0.13    0.85
  -3  -6  17    2.84    1.07
  -3   6  17    3.60    1.19
  -3  -6  16    0.14    0.58
  -3   6  16    0.87    0.78
  -3  -6  15    8.38    1.34
  -3   6  15    8.83    1.41
  -3   6  15   11.77    1.32
  -3  -6  14   -0.18    0.51
  -3   6  14   -0.22    0.68
  -3   6  14    0.15    0.46
  -3  -6  13   51.52    2.62
  -3   6  13   53.09    2.71
  -3   6  13   57.48    2.42
  -3  -6  12   -0.19    0.32
  -3   6  12    0.86    0.69
  -3   6  12    0.40    0.39
  -3  -6  11   25.73    1.70
  -3   6  11   29.64    1.90
  -3  -6  10    0.15    0.36
  -3   6  10    1.34    0.68
   3   6 -10    0.75    0.39
  -3  -6   9  148.37    2.66
  -3  -6   9  147.33    3.62
  -3   6   9  161.70    3.86
   3   6  -9  177.58    3.12
  -3  -6   8    0.24    0.24
  -3  -6   8    0.10    0.30
  -3   6   8    0.45    0.23
  -3   6   8    0.35    0.49
   3   6  -8    0.18    0.32
  -3  -6   7  186.23    2.72
  -3  -6   7  165.95    3.45
  -3   6   7  174.53    3.65
   3   6  -7  190.75    3.13
  -3  -6   6    1.87    0.34
  -3  -6   6    1.48    0.42
  -3   6   6    2.84    0.40
  -3   6   6    1.98    0.56
   3   6  -6    2.19    0.46
  -3  -6   5  132.16    2.16
  -3  -6   5  116.09    2.55
  -3   6   5  154.78    2.35
  -3   6   5  110.98    2.63
   3   6  -5  130.72    2.54
  -3  -6   4    0.94    0.30
  -3   6   4    0.32    0.23
  -3   6   4    0.66    0.38
   3   6  -4    0.74    0.30
  -3  -6   3   74.97    1.75
  -3   6   3   85.21    1.85
  -3   6   3   73.69    1.93
   3   6  -3   87.35    2.06
  -3  -6   2    4.02    0.41
  -3   6   2    4.97    0.57
  -3   6   2    4.37    0.53
   3   6  -2    5.39    0.59
  -3  -6   1  149.18    1.99
  -3   6   1  163.33    2.71
  -3   6   1  152.37    2.39
   3   6  -1  163.44    2.83
  -3   6   0    4.53    0.59
  -3   6   0    4.79    0.46
   3   6   0    4.91    0.58
   3   6   0    4.86    0.52
  -3   6  -1   17.80    1.03
  -3   6  -1   16.79    0.69
   3   6   1   18.38    1.00
   3   6   1   18.39    0.97
  -3   6  -2    3.68    0.59
   3  -6   2    3.67    0.56
   3   6   2    4.17    0.57
   3   6   2    4.00    0.56
  -3   6  -3    9.96    0.90
   3  -6   3    7.91    0.80
   3   6   3   10.11    0.81
   3   6   3    7.82    0.77
  -3   6  -4   20.39    1.23
   3  -6   4   16.40    1.08
   3   6   4   27.68    1.31
   3   6   4   23.39    1.28
  -3  -6  -5    0.75    0.38
  -3  -6  -5    0.44    0.32
  -3   6  -5    1.28    0.52
   3  -6   5    0.46    0.38
   3   6   5    0.45    0.34
  -3  -6  -6   10.48    0.89
  -3  -6  -6   10.30    0.90
  -3   6  -6    9.50    1.00
   3  -6   6    9.85    0.97
   3   6   6    9.26    0.92
   3   6   6    9.77    0.61
  -3  -6  -7    1.54    0.49
  -3   6  -7    1.74    0.58
   3  -6   7    1.64    0.58
   3   6   7    1.06    0.51
   3   6   7    0.71    0.31
  -3  -6  -8   12.09    1.02
  -3   6  -8    8.79    1.09
   3  -6   8    8.57    1.02
   3   6   8    9.92    1.05
   3   6   8   10.67    0.79
  -3  -6  -9    3.70    0.72
  -3   6  -9    3.05    0.80
   3  -6   9    3.24    0.80
   3   6   9    2.88    0.76
  -3  -6 -10   13.02    1.14
  -3   6 -10   12.66    1.30
   3  -6  10   11.03    1.26
   3   6  10   11.30    1.21
  -3  -6 -11    1.12    0.58
  -3   6 -11    0.78    0.67
   3  -6  11    0.37    0.56
   3   6  11    1.11    0.65
  -3   6 -12    0.30    0.62
   3  -6  12    0.02    0.56
   3   6  12    0.07    0.58
  -3   6 -13    1.80    0.82
   3  -6  13    1.56    0.86
   3   6  13    1.39    0.83
   3  -6  14    1.46    0.83
   3   6  14    2.97    0.98
   3  -6  15    0.54    0.76
   3   6  15    0.46    0.79
   3  -6  16    0.22    0.71
   3   6  16    0.54    0.81
   3  -6  17    0.29    0.75
   3   6  17    0.46    0.84
   3  -6  18    0.43    0.87
   3   6  18    0.61    0.93
   3  -6  19   -0.70    0.89
   3   6  19    0.18    0.94
  -3  -7  20   -0.16    0.78
  -3   7  20    0.42    1.01
  -3  -7  19   -0.12    0.66
  -3   7  19    0.17    0.95
  -3  -7  18    1.41    0.92
  -3   7  18    1.15    1.03
  -3  -7  17    0.55    0.67
  -3   7  17    0.70    0.92
  -3  -7  16    1.58    0.83
  -3   7  16    2.97    1.12
  -3  -7  15   -0.06    0.50
  -3   7  15    0.88    0.82
  -3  -7  14    7.39    1.25
  -3   7  14    6.49    1.27
  -3  -7  13   -0.22    0.40
  -3   7  13    0.51    0.67
  -3   7  13   -0.17    0.36
  -3  -7  12    5.68    1.03
  -3   7  12    5.24    1.13
  -3   7  12    5.15    0.83
  -3  -7  11    0.75    0.46
  -3   7  11    0.31    0.57
  -3   7  10    6.68    1.06
  -3  -7   9   10.83    1.06
  -3   7   9   11.73    1.21
   3   7  -9   13.04    1.00
  -3  -7   8    7.04    0.63
  -3  -7   8    5.51    0.81
  -3   7   8    6.68    0.98
   3   7  -8    6.34    0.79
  -3  -7   7    6.05    0.55
  -3  -7   7    5.50    0.74
  -3   7   7    7.31    0.62
  -3   7   7    5.56    0.85
   3   7  -7    5.78    0.71
  -3  -7   6    1.51    0.32
  -3  -7   6    1.14    0.41
  -3   7   6    1.70    0.54
   3   7  -6    1.34    0.44
  -3  -7   5   11.03    0.84
  -3   7   5   15.24    0.87
  -3   7   5   11.32    1.00
   3   7  -5   12.49    0.91
  -3   7   4    2.76    0.53
  -3  -7   3    8.38    0.63
  -3   7   3    9.39    0.74
  -3   7   3    8.87    0.80
   3   7  -3    9.78    0.80
  -3  -7   2    7.30    0.55
  -3   7   2    7.24    0.69
  -3   7   2    7.40    0.69
   3   7  -2    6.91    0.71
  -3  -7   1   23.72    0.83
  -3   7   1   24.55    1.18
  -3   7   1   22.31    1.01
   3   7  -1   25.60    1.23
  -3   7   0    1.98    0.47
  -3   7   0    1.14    0.31
   3   7   0    1.33    0.39
   3   7   0    1.67    0.39
  -3   7  -1   27.08    1.30
  -3   7  -1   24.37    0.88
   3   7   1   28.01    1.30
   3   7   1   25.93    1.21
  -3   7  -2    8.79    0.85
   3   7   2    9.89    0.82
   3   7   2    8.39    0.78
  -3   7  -3   16.47    1.13
   3  -7   3   14.57    1.06
   3   7   3   14.12    0.98
   3   7   3   13.04    0.96
  -3   7  -4    4.60    0.73
   3  -7   4    5.30    0.73
   3   7   4    8.00    0.79
   3   7   4    6.48    0.80
  -3   7  -5   11.49    1.06
   3  -7   5   11.08    1.02
   3   7   5   13.84    1.02
   3   7   5   11.97    1.02
  -3  -7  -6    0.05    0.29
  -3  -7  -6   -0.02    0.26
  -3   7  -6   -0.31    0.36
   3  -7   6    0.23    0.38
   3   7   6   -0.05    0.34
  -3  -7  -7   23.70    1.37
  -3  -7  -7   21.31    1.30
  -3   7  -7   21.34    1.44
   3  -7   7   18.68    1.35
   3   7   7   20.51    1.41
  -3  -7  -8    3.68    0.69
  -3   7  -8    3.36    0.80
   3  -7   8    2.44    0.71
   3   7   8    2.80    0.74
  -3  -7  -9    2.13    0.62
  -3   7  -9    2.22    0.78
   3  -7   9    1.51    0.68
   3   7   9    2.32    0.75
   3  -7  10    4.07    0.90
   3   7  10    3.00    0.82
  -3  -7 -11    1.69    0.63
  -3   7 -11    1.63    0.74
   3  -7  11    1.70    0.74
   3   7  11    1.67    0.80
  -3   7 -12   11.68    1.38
   3  -7  12    9.29    1.34
   3   7  12   12.90    1.47
  -3   7 -13    1.11    0.77
   3  -7  13    0.63    0.71
   3   7  13   -0.18    0.60
   3  -7  14    9.43    1.48
   3   7  14   12.47    1.64
   3  -7  15    0.24    0.70
   3   7  15   -0.02    0.67
   3  -7  16    8.87    1.57
   3   7  16    8.05    1.50
   3  -7  17    0.06    0.80
   3   7  17    0.36    0.85
   3  -7  18    8.24    1.72
   3   7  18   11.06    1.80
   3  -7  19   -0.05    1.03
   3   7  19    0.10    0.98
  -3  -8  20    0.23    0.87
  -3   8  20   -0.28    0.92
  -3  -8  19    0.57    0.77
  -3   8  19    0.98    1.07
  -3  -8  18    0.03    0.64
  -3   8  18    0.69    0.96
  -3  -8  17    0.86    0.76
  -3   8  17    0.05    0.80
  -3  -8  16    0.05    0.54
  -3   8  16   -0.29    0.70
  -3  -8  15   12.44    1.55
  -3   8  15   14.03    1.77
  -3  -8  14   -0.60    0.44
  -3   8  14    0.34    0.71
  -3  -8  13   22.61    1.85
  -3   8  13   20.95    1.92
  -3  -8  12    3.76    0.93
  -3   8  12    3.48    1.00
  -3  -8  11   38.48    2.15
  -3   8  11   37.39    2.19
  -3  -8  10    0.26    0.37
  -3   8  10    0.30    0.54
   3   8 -10    0.16    0.40
  -3  -8   9  126.41    3.49
  -3   8   9  118.53    3.49
   3   8  -9  143.87    3.20
  -3  -8   8    0.22    0.34
  -3   8   8    0.72    0.31
  -3   8   8    0.26    0.49
   3   8  -8    0.30    0.37
  -3  -8   7  228.39    2.95
  -3  -8   7  199.97    3.95
  -3   8   7  257.73    3.49
  -3   8   7  199.24    4.14
   3   8  -7  234.62    3.95
  -3  -8   6    0.30    0.22
  -3  -8   6    0.23    0.26
  -3   8   6    0.44    0.28
  -3   8   6    0.11    0.39
   3   8  -6    0.13    0.31
  -3  -8   5  186.08    3.38
  -3   8   5  221.05    3.33
  -3   8   5  180.75    3.57
   3   8  -5  213.93    3.70
  -3  -8   4    1.01    0.32
  -3   8   4    1.44    0.39
  -3   8   4    1.11    0.47
   3   8  -4    1.70    0.46
  -3  -8   3  167.41    2.76
  -3   8   3  180.14    3.11
  -3   8   3  155.46    2.99
   3   8  -3  180.68    3.36
  -3  -8   2    0.99    0.27
  -3   8   2    1.85    0.46
  -3   8   2    1.28    0.40
   3   8  -2    1.68    0.46
  -3  -8   1  127.15    1.96
  -3   8   1  135.51    2.81
  -3   8   1  126.88    2.38
   3   8  -1  141.67    2.98
  -3   8   0    0.71    0.39
  -3   8   0    0.40    0.29
   3   8   0    0.32    0.32
   3   8   0    0.70    0.33
  -3   8  -1   41.92    1.69
  -3   8  -1   37.22    1.12
   3   8   1   41.02    1.65
   3   8   1   41.17    1.57
  -3   8  -2    2.88    0.59
  -3   8  -2    2.59    0.34
   3   8   2    2.84    0.55
   3   8   2    2.96    0.56
  -3   8  -3   35.12    1.63
   3  -8   3   34.13    1.56
   3   8   3   36.36    1.59
   3   8   3   36.84    1.62
  -3   8  -4    1.32    0.52
   3  -8   4    0.64    0.46
   3   8   4    1.17    0.43
   3   8   4    0.70    0.43
  -3   8  -5    0.09    0.38
   3  -8   5    0.35    0.39
   3   8   5    0.03    0.28
   3   8   5   -0.01    0.37
  -3  -8  -6    1.78    0.52
  -3   8  -6    2.50    0.69
   3  -8   6    2.07    0.63
   3   8   6    2.65    0.60
   3   8   6    2.44    0.68
  -3  -8  -7    4.18    0.76
  -3  -8  -7    2.96    0.64
  -3   8  -7    3.00    0.75
   3  -8   7    2.45    0.67
   3   8   7    2.43    0.69
  -3  -8  -8    0.59    0.47
  -3  -8  -8    0.34    0.39
  -3   8  -8    0.17    0.51
   3  -8   8    0.16    0.42
   3   8   8   -0.04    0.42
  -3  -8  -9    0.43    0.47
  -3   8  -9    0.59    0.58
   3  -8   9   -0.08    0.43
   3   8   9   -0.26    0.44
  -3  -8 -10    0.38    0.48
  -3   8 -10   -0.22    0.55
   3  -8  10    0.36    0.54
   3   8  10   -0.03    0.46
  -3  -8 -11    8.85    1.12
  -3   8 -11    9.16    1.26
   3  -8  11    7.41    1.22
   3   8  11    7.80    1.20
  -3   8 -12    1.68    0.77
   3  -8  12    1.03    0.71
   3   8  12    0.58    0.69
  -3   8 -13    3.61    0.98
   3  -8  13    2.10    0.93
   3   8  13    2.23    1.00
   3  -8  14    0.99    0.78
   3   8  14    0.10    0.75
   3  -8  15    2.85    1.02
   3   8  15    2.64    1.04
   3  -8  16    0.32    0.78
   3   8  16    0.59    0.84
   3  -8  17    0.44    0.86
   3   8  17    1.00    1.03
   3  -8  18    0.97    1.03
   3   8  18    0.69    1.00
   3  -8  19   -0.81    0.83
   3   8  19    0.34    1.03
  -3  -9  19   -0.66    0.63
  -3   9  19    0.80    0.95
  -3  -9  18    1.26    0.93
  -3   9  18   -0.23    0.93
  -3  -9  17   -0.28    0.58
  -3   9  17   -0.06    0.79
  -3  -9  16    2.00    0.95
  -3   9  16    1.61    0.95
  -3  -9  15    1.38    0.78
  -3   9  15    1.84    1.01
  -3  -9  14    7.41    1.29
  -3   9  14    7.38    1.37
  -3  -9  13   -0.01    0.50
  -3   9  13    0.14    0.70
  -3  -9  12    5.85    1.09
  -3   9  12    5.56    1.19
  -3  -9  11    0.07    0.39
  -3   9  11    0.57    0.72
   3   9 -11    0.18    0.41
  -3   9  10   11.67    1.42
   3   9 -10   18.16    1.32
  -3  -9   9    4.66    0.84
  -3   9   9    5.14    0.97
   3   9  -9    5.32    0.83
  -3  -9   8    8.55    0.96
  -3   9   8   20.72    1.11
  -3   9   8    8.86    1.15
   3   9  -8    9.92    1.01
  -3  -9   7    0.73    0.40
  -3   9   7    1.56    0.42
  -3   9   7    2.01    0.68
   3   9  -7    1.05    0.47
  -3  -9   6    2.04    0.37
  -3  -9   6    1.46    0.45
  -3   9   6    1.71    0.46
  -3   9   6    1.22    0.61
   3   9  -6    2.03    0.55
  -3  -9   5   21.11    1.20
  -3   9   5   24.13    1.22
  -3   9   5   18.26    1.26
   3   9  -5   22.79    1.34
  -3   9   4    1.84    0.54
  -3  -9   3   12.61    0.82
  -3   9   3   13.51    0.98
  -3   9   3   12.44    0.98
   3   9  -3   11.88    0.99
  -3  -9   2    1.77    0.35
  -3   9   2    1.70    0.47
  -3   9   2    1.97    0.48
   3   9  -2    1.38    0.48
  -3  -9   1   17.83    0.79
  -3   9   1   20.70    1.22
  -3   9   1   18.20    1.00
   3   9  -1   19.80    1.23
  -3   9   0   24.50    1.34
  -3   9   0   22.93    1.03
   3   9   0   24.84    1.36
   3   9   0   22.70    1.17
  -3   9  -1   -0.01    0.31
  -3   9  -1    0.60    0.30
   3   9   1    0.59    0.37
   3   9   1    0.06    0.29
  -3   9  -2    7.53    0.88
  -3   9  -2    6.82    0.54
   3   9   2    7.67    0.82
   3   9   2    6.67    0.79
  -3   9  -3   13.94    1.15
   3  -9   3   12.36    1.06
   3   9   3   13.16    1.04
   3   9   3   13.07    1.04
  -3   9  -4   11.68    1.10
   3  -9   4   10.06    1.01
   3   9   4   11.97    1.02
   3   9   4    8.10    0.90
  -3   9  -5    3.01    0.72
   3  -9   5    1.86    0.61
   3   9   5    3.22    0.63
   3   9   5    2.61    0.67
  -3   9  -6    0.98    0.57
   3  -9   6    1.27    0.55
   3   9   6    0.98    0.46
   3   9   6    1.16    0.57
  -3  -9  -7   10.02    1.03
  -3  -9  -7   10.37    1.03
  -3   9  -7   10.13    1.17
   3  -9   7    9.20    1.11
   3   9   7    8.09    1.07
  -3  -9  -8    1.88    0.63
  -3  -9  -8    2.06    0.61
  -3   9  -8    1.02    0.65
   3  -9   8    1.45    0.65
   3   9   8    1.19    0.63
  -3  -9  -9    7.53    1.02
  -3  -9  -9    6.83    0.96
  -3   9  -9    6.96    1.11
   3  -9   9    5.78    1.03
   3   9   9    6.50    1.07
  -3  -9 -10    1.17    0.59
  -3   9 -10    0.98    0.68
   3   9  10    0.60    0.59
  -3  -9 -11    4.75    0.97
  -3   9 -11    4.01    0.99
   3  -9  11    3.03    0.94
   3   9  11    3.67    0.97
  -3   9 -12   11.57    1.44
   3  -9  12    6.44    1.24
   3   9  12    7.70    1.31
  -3   9 -13    1.38    0.81
   3  -9  13    1.97    0.92
   3   9  13    2.50    0.98
   3  -9  14    8.47    1.49
   3   9  14    8.13    1.45
   3  -9  15    0.21    0.74
   3   9  15    0.62    0.86
   3  -9  16    3.49    1.27
   3   9  16    5.17    1.38
   3  -9  17   -0.38    0.80
   3   9  17    0.33    0.85
   3  -9  18    5.20    1.52
   3   9  18    8.55    1.71
  -3 -10  19    0.22    0.84
  -3  10  19   -0.07    0.97
  -3 -10  18    0.80    0.86
  -3  10  18    1.08    1.04
  -3 -10  17    2.45    1.03
  -3  10  17    5.88    1.46
  -3 -10  16    0.41    0.66
  -3  10  16   -0.87    0.67
  -3 -10  15    6.61    1.31
  -3  10  15    6.15    1.37
  -3 -10  14    0.77    0.67
  -3  10  14    1.23    0.85
  -3 -10  13   13.53    1.53
  -3  10  13   13.78    1.69
  -3 -10  12    0.54    0.58
  -3  10  12    0.80    0.79
  -3 -10  11   28.05    1.92
  -3  10  11   25.83    1.96
   3  10 -11   31.73    1.78
  -3 -10  10   -0.06    0.31
  -3  10  10   -0.48    0.55
   3  10 -10    0.17    0.41
  -3 -10   9   39.44    2.04
  -3  10   9   38.12    2.16
   3  10  -9   43.52    1.99
  -3 -10   8    0.25    0.34
  -3  10   8    0.44    0.33
  -3  10   8   -0.04    0.55
   3  10  -8    0.18    0.41
  -3 -10   7  102.85    2.96
  -3  10   7  124.52    2.80
  -3  10   7  102.51    3.18
   3  10  -7  118.31    3.14
  -3 -10   6    0.75    0.39
  -3  10   6    1.09    0.43
  -3  10   6    0.48    0.55
   3  10  -6    0.94    0.47
  -3 -10   5   87.64    2.44
  -3  10   5   98.71    2.55
  -3  10   5   84.45    2.64
   3  10  -5   93.07    2.73
   3  10  -4    0.96    0.42
  -3 -10   3   90.03    2.15
  -3  10   3   98.60    2.61
  -3  10   3   80.61    2.34
   3  10  -3   97.94    2.77
  -3 -10   2    0.24    0.22
  -3  10   2    0.51    0.36
  -3  10   2    0.42    0.38
   3  10  -2    0.47    0.36
  -3 -10   1   69.06    1.56
  -3  10   1   75.24    2.36
  -3  10   1   65.19    1.88
   3  10  -1   78.08    2.47
  -3 -10   0    0.83    0.23
  -3  10   0    1.41    0.49
  -3  10   0    0.71    0.36
   3  10   0    0.68    0.37
   3  10   0    0.48    0.31
  -3  10  -1   32.55    1.63
  -3  10  -1   27.83    1.10
   3  10   1   35.57    1.69
   3  10   1   31.02    1.48
  -3  10  -2    0.07    0.34
  -3  10  -2    0.24    0.27
   3  10   2   -0.06    0.25
   3  10   2    0.16    0.33
  -3  10  -3   27.71    1.61
   3 -10   3   24.91    1.45
   3  10   3   31.76    1.63
   3  10   3   26.53    1.50
  -3  10  -4   19.94    1.43
   3 -10   4   16.49    1.28
   3  10   4   21.34    1.37
   3  10   4   15.02    1.20
  -3  10  -5    3.66    0.81
   3 -10   5    3.98    0.79
   3  10   5    3.57    0.70
   3  10   5    3.31    0.73
  -3  10  -6    3.22    0.82
   3 -10   6    3.52    0.80
   3  10   6    4.13    0.77
   3  10   6    2.85    0.76
  -3  10  -7    0.46    0.58
   3 -10   7   -0.18    0.41
   3  10   7    0.30    0.37
   3  10   7    0.72    0.57
  -3 -10  -8   12.93    1.23
  -3 -10  -8   12.07    1.18
  -3  10  -8   10.50    1.26
   3 -10   8   10.32    1.23
   3  10   8    9.97    1.20
  -3 -10  -9    3.48    0.85
  -3 -10  -9    3.28    0.78
  -3  10  -9    3.19    0.88
   3 -10   9    3.27    0.90
   3  10   9    3.32    0.90
  -3 -10 -10   15.03    1.37
  -3 -10 -10   15.56    1.37
  -3  10 -10   15.28    1.54
   3 -10  10   11.30    1.39
   3  10  10   10.76    1.34
  -3  10 -11    1.78    0.79
   3 -10  11    1.38    0.77
   3  10  11    0.58    0.66
  -3  10 -12    2.51    0.93
   3 -10  12    1.70    0.86
   3  10  12    2.15    0.93
  -3  10 -13    3.76    1.06
   3 -10  13    2.77    1.03
   3  10  13    2.46    0.98
   3 -10  14    3.23    1.11
   3  10  14    3.52    1.13
   3 -10  15    0.90    0.83
   3  10  15    1.35    0.94
   3 -10  16    0.41    0.81
   3  10  16    0.28    0.83
   3 -10  17   -0.93    0.77
   3  10  17   -0.37    0.83
   3 -10  18    0.13    0.91
   3  10  18    0.63    1.03
  -3 -11  19   -0.16    0.76
  -3  11  19   -0.47    0.99
  -3 -11  18   -0.14    0.69
  -3  11  18    0.99    1.06
  -3 -11  17    0.13    0.72
  -3  11  17    1.30    1.03
  -3 -11  16    0.03    0.64
  -3  11  16   -0.04    0.81
  -3 -11  15    0.98    0.74
  -3  11  15    3.14    1.17
  -3 -11  14    2.67    1.00
  -3  11  14    2.60    0.99
  -3 -11  13   -0.02    0.50
  -3  11  13    0.16    0.72
  -3 -11  12    0.20    0.51
  -3  11  12   -0.35    0.69
  -3 -11  11    1.74    0.69
  -3  11  11    1.45    0.84
   3  11 -11    1.11    0.61
  -3 -11  10    3.51    0.84
  -3  11  10    2.06    0.86
   3  11 -10    4.08    0.83
  -3 -11   9    0.98    0.50
  -3  11   9    0.03    0.59
   3  11  -9    0.52    0.51
  -3 -11   8    1.12    0.53
  -3  11   8    0.71    0.62
   3  11  -8    1.20    0.59
  -3 -11   7    3.04    0.67
  -3  11   7    3.46    0.64
  -3  11   7    3.55    0.85
   3  11  -7    2.97    0.71
  -3 -11   6   -0.07    0.26
  -3  11   6    0.00    0.29
  -3  11   6   -0.23    0.50
   3  11  -6   -0.05    0.36
  -3 -11   5   13.23    1.03
  -3  11   5   16.11    1.17
  -3  11   5   13.66    1.26
   3  11  -5   16.08    1.27
  -3 -11   3    0.98    0.36
  -3  11   3    1.18    0.48
  -3  11   3    1.10    0.50
   3  11  -3    1.61    0.55
  -3 -11   2    0.34    0.25
  -3  11   2    0.25    0.34
  -3  11   2    0.12    0.40
   3  11  -2    0.14    0.35
  -3 -11   1   26.94    1.04
  -3  11   1   29.16    1.58
  -3  11   1   27.99    1.34
   3  11  -1   30.79    1.67
  -3  11   0    2.15    0.57
  -3  11   0    2.29    0.49
   3  11   0    3.40    0.67
   3  11   0    3.04    0.56
  -3  11  -1   33.53    1.74
  -3  11  -1   31.10    1.21
   3  11   1   35.76    1.78
   3  11   1   31.49    1.55
  -3  11  -2    0.33    0.36
   3  11   2    0.14    0.31
   3  11   2    0.12    0.37
  -3  11  -3   50.12    2.18
   3 -11   3   44.23    1.95
   3  11   3   51.30    2.15
   3  11   3   48.30    2.05
  -3  11  -4    2.90    0.72
   3  11   4    2.81    0.63
   3  11   4    2.76    0.70
  -3  11  -5   33.11    1.90
   3 -11   5   28.39    1.72
   3  11   5   34.07    1.80
   3  11   5   28.01    1.74
  -3  11  -6    2.66    0.79
   3 -11   6    2.31    0.73
   3  11   6    1.59    0.61
   3  11   6    2.42    0.73
  -3  11  -7   51.86    2.44
   3 -11   7   43.61    2.22
   3  11   7   48.54    2.21
   3  11   7   44.75    2.28
  -3 -11  -8    0.29    0.53
  -3 -11  -8    0.14    0.44
  -3  11  -8    0.25    0.56
   3 -11   8   -0.02    0.48
   3  11   8    1.02    0.66
  -3 -11  -9    9.20    1.20
  -3 -11  -9    8.09    1.11
  -3  11  -9    9.10    1.28
   3 -11   9    7.04    1.17
   3  11   9    9.23    1.30
  -3  11 -11   11.75    1.44
   3 -11  11    7.56    1.31
   3  11  11    8.85    1.39
  -3  11 -12    5.74    1.19
   3 -11  12    3.93    1.09
   3  11  12    4.01    1.11
  -3  11 -13    1.76    0.89
   3 -11  13    2.23    0.98
   3  11  13    1.87    0.98
   3 -11  14    4.58    1.26
   3  11  14    4.83    1.27
   3 -11  15    0.27    0.71
   3  11  15    0.40    0.80
   3 -11  16    3.09    1.26
   3  11  16    4.50    1.35
   3 -11  17    0.03    0.86
   3  11  17    0.79    1.02
   3 -11  18    1.62    1.17
   3  11  18    4.11    1.47
  -3 -12  18    5.63    1.51
  -3  12  18    5.46    1.55
  -3 -12  17    0.05    0.73
  -3  12  17    2.72    1.23
  -3 -12  16    2.28    1.06
  -3  12  16    2.59    1.11
  -3 -12  15    2.96    1.06
  -3  12  15    4.05    1.27
  -3 -12  14    3.75    1.07
  -3  12  14    4.31    1.24
  -3 -12  13    6.79    1.26
  -3  12  13    5.67    1.30
  -3 -12  12    0.38    0.58
  -3  12  12    0.64    0.77
  -3 -12  11   13.79    1.47
  -3  12  11   12.63    1.60
   3  12 -11   17.68    1.51
  -3 -12  10    0.51    0.53
  -3  12  10   -0.03    0.68
   3  12 -10    1.21    0.62
  -3 -12   9   20.26    1.57
  -3  12   9   20.66    1.75
   3  12  -9   23.38    1.65
  -3 -12   8    0.20    0.35
  -3  12   8    0.51    0.40
  -3  12   8    0.72    0.67
   3  12  -8    0.90    0.59
  -3 -12   7   33.66    1.80
  -3  12   7   39.69    1.81
  -3  12   7   31.66    1.93
   3  12  -7   38.97    2.03
  -3 -12   6   -0.12    0.30
  -3  12   6   -0.01    0.31
  -3  12   6   -0.20    0.50
   3  12  -6    0.17    0.44
  -3 -12   5   37.41    1.70
  -3  12   5   43.15    1.91
  -3  12   5   37.33    1.95
   3  12  -5   44.19    2.11
  -3  12   4    4.57    0.76
  -3  12   4    3.02    0.72
  -3 -12   3   21.30    1.16
  -3  12   3   25.03    1.51
  -3  12   3   21.11    1.39
   3  12  -3   25.59    1.62
  -3 -12   2    5.00    0.60
  -3  12   2    4.63    0.77
  -3  12   2    4.31    0.72
   3  12  -2    4.54    0.81
  -3  12   1   23.61    1.51
  -3  12   1   19.79    1.22
   3  12  -1   21.08    1.48
  -3  12   0   15.67    1.27
  -3  12   0   13.27    0.97
   3  12   0   15.55    1.28
   3  12   0   13.51    1.07
  -3  12  -1   22.36    1.54
   3  12   1   21.93    1.49
   3  12   1   19.18    1.28
  -3  12  -2   14.73    1.32
   3  12   2   15.40    1.29
   3  12   2   12.34    1.11
  -3  12  -3   10.42    1.17
   3  12   3   10.79    1.12
   3  12   3    9.76    1.03
  -3  12  -4   50.12    2.32
   3 -12   4   44.63    2.09
   3  12   4   53.85    2.32
   3  12   4   52.01    2.28
  -3  12  -5    1.11    0.62
   3 -12   5    0.22    0.48
   3  12   5    0.57    0.49
   3  12   5    0.35    0.50
  -3  12  -6    9.41    1.25
   3 -12   6    7.61    1.10
   3  12   6    9.75    1.14
   3  12   6   10.64    1.26
  -3  12  -7    1.62    0.73
   3 -12   7    2.24    0.74
   3  12   7    0.93    0.56
   3  12   7    1.65    0.73
  -3  12  -8   38.85    2.25
   3 -12   8   31.43    2.06
   3  12   8   36.46    2.05
   3  12   8   35.81    2.19
  -3 -12  -9    0.40    0.59
  -3 -12  -9    0.35    0.51
  -3  12  -9   -0.18    0.51
   3 -12   9   -0.22    0.56
   3  12   9    0.32    0.57
  -3 -12 -10   19.18    1.62
  -3  12 -10   16.83    1.66
   3 -12  10   13.12    1.53
   3  12  10    9.15    1.40
  -3  12 -11    0.43    0.66
   3 -12  11    0.12    0.61
   3  12  11    0.80    0.73
  -3  12 -12   23.49    1.98
   3 -12  12   16.04    1.79
   3  12  12   19.45    1.90
  -3  12 -13    0.72    0.74
   3 -12  13    0.18    0.67
   3  12  13    0.00    0.73
   3 -12  14    3.63    1.18
   3  12  14    4.29    1.26
   3 -12  15    0.24    0.79
   3  12  15    0.75    0.91
   3 -12  16    2.10    1.11
   3  12  16    2.71    1.21
   3 -12  17    0.50    0.92
   3  12  17    0.18    0.91
  -3 -13  18    0.10    0.85
  -3  13  18    0.26    0.98
  -3 -13  17    6.32    1.50
  -3  13  17    8.52    1.72
  -3 -13  16   -0.10    0.66
  -3  13  16    1.03    0.98
  -3 -13  15    5.96    1.35
  -3  13  15    7.97    1.54
  -3 -13  14    1.32    0.81
  -3  13  14    1.51    0.98
  -3 -13  13    6.88    1.29
  -3  13  13    5.54    1.33
  -3 -13  12    0.59    0.64
  -3  13  12    1.11    0.86
  -3 -13  11    8.83    1.28
  -3  13  11    8.31    1.42
   3  13 -11   13.08    1.41
  -3 -13  10    2.97    0.86
  -3  13  10    3.97    1.09
   3  13 -10    3.26    0.87
  -3 -13   9    2.49    0.77
  -3  13   9    1.97    0.83
   3  13  -9    2.71    0.80
  -3 -13   8    3.16    0.76
  -3  13   8    3.28    0.94
   3  13  -8    3.34    0.85
  -3 -13   7    0.55    0.42
  -3  13   7    0.53    0.45
  -3  13   7    0.34    0.63
   3  13  -7    1.06    0.59
  -3 -13   6    6.88    0.92
  -3  13   6    7.41    0.91
  -3  13   6    5.44    1.02
   3  13  -6    8.54    1.13
  -3 -13   5    4.82    0.75
  -3  13   5    4.37    0.80
  -3  13   5    3.88    0.88
   3  13  -5    4.57    0.88
  -3  13   4   10.35    1.08
  -3  13   4    6.44    0.95
  -3 -13   3   12.25    0.95
  -3  13   3   13.38    1.22
  -3  13   3   13.41    1.20
   3  13  -3   14.27    1.30
  -3  13   2    3.33    0.78
  -3  13   2    3.89    0.74
   3  13  -2    5.43    0.93
  -3  13   1   33.23    1.86
  -3  13   1   27.87    1.46
   3  13  -1   35.11    1.95
  -3  13   0    0.44    0.46
  -3  13   0    0.17    0.37
   3  13   0    0.04    0.35
   3  13   0    0.26    0.36
  -3  13  -1   58.39    2.50
   3  13   1   60.21    2.51
   3  13   1   56.22    2.18
  -3  13  -2    0.23    0.45
   3  13   2    0.04    0.37
   3  13   2    0.46    0.44
  -3  13  -3   51.06    2.40
   3  13   3   51.48    2.35
   3  13   3   45.33    2.13
   3 -13   4    0.94    0.58
   3  13   4    3.02    0.73
   3  13   4    3.26    0.77
  -3  13  -5   49.93    2.46
   3 -13   5   43.97    2.21
   3  13   5   52.14    2.40
   3  13   5   47.98    2.35
  -3  13  -6    0.99    0.66
   3 -13   6    1.06    0.65
   3  13   6    1.66    0.67
   3  13   6    0.85    0.65
  -3  13  -7   64.06    2.87
   3 -13   7   56.02    2.65
   3  13   7   59.61    2.64
   3  13   7   56.39    2.71
  -3  13  -8    0.44    0.62
   3 -13   8    0.50    0.61
   3  13   8    0.04    0.50
   3  13   8    0.81    0.67
  -3 -13  -9    7.62    1.22
  -3 -13  -9    8.79    1.22
  -3  13  -9    8.48    1.32
   3 -13   9    5.56    1.14
   3  13   9    8.39    1.33
  -3 -13 -10    1.26    0.77
  -3 -13 -10    1.38    0.76
  -3  13 -10    1.74    0.82
   3 -13  10    0.40    0.68
   3  13  10    2.22    0.93
  -3  13 -11    9.94    1.46
   3 -13  11    8.09    1.38
   3  13  11    9.04    1.46
  -3  13 -12    5.86    1.22
   3 -13  12    3.43    1.10
   3  13  12    4.48    1.21
  -3  13 -13    2.50    0.97
   3 -13  13    0.69    0.81
   3  13  13    1.18    0.88
   3 -13  14    2.06    1.00
   3  13  14    2.28    1.09
   3 -13  15    0.77    0.87
   3  13  15    2.76    1.20
   3 -13  16    1.77    1.13
   3  13  16    1.90    1.09
   3 -13  17    0.23    0.90
   3  13  17    0.56    1.02
  -3 -14  17    0.24    0.78
  -3  14  17    0.28    0.96
  -3 -14  16    2.73    1.18
  -3  14  16    2.32    1.21
  -3 -14  15    0.55    0.75
  -3  14  15   -0.04    0.84
  -3 -14  14    2.07    0.94
  -3  14  14    2.80    1.16
  -3 -14  13   -0.14    0.57
  -3  14  13   -0.01    0.83
  -3 -14  12    0.00    0.58
  -3  14  12    0.69    0.85
  -3 -14  11    2.79    0.92
  -3  14  11    2.65    1.06
   3  14 -11    4.40    1.04
  -3 -14  10   -0.01    0.49
  -3  14  10   -0.43    0.65
   3  14 -10    0.19    0.57
  -3 -14   9    1.18    0.64
  -3  14   9    1.31    0.83
   3  14  -9    1.34    0.66
  -3 -14   8   -0.04    0.35
  -3  14   8   -0.12    0.62
   3  14  -8    0.08    0.49
  -3 -14   7    9.16    1.09
  -3  14   7    8.08    1.10
  -3  14   7    8.24    1.22
   3  14  -7    9.50    1.25
  -3 -14   6    0.52    0.47
  -3  14   6    1.44    0.61
  -3  14   6    0.34    0.66
   3  14  -6    1.36    0.67
  -3 -14   5    7.69    0.94
  -3  14   5    9.16    1.17
  -3  14   5    8.54    1.18
   3  14  -5    8.93    1.21
  -3  14   4    3.09    0.77
  -3  14   4    2.21    0.74
  -3  14   3    4.00    0.86
  -3  14   3    3.92    0.82
   3  14  -3    4.01    0.88
  -3  14   2   -0.20    0.42
  -3  14   2   -0.20    0.43
   3  14  -2   -0.06    0.41
  -3  14   1   12.91    1.29
  -3  14   1   11.77    1.10
   3  14  -1   13.50    1.34
  -3  14   0    3.19    0.82
   3  14   0    2.51    0.73
   3  14   0    2.12    0.60
  -3  14  -1    5.83    1.01
   3  14   1    7.27    1.07
   3  14   1    5.33    0.85
  -3  14  -2   17.46    1.54
   3  14   2   15.87    1.44
   3  14   2   16.94    1.36
  -3  14  -3   18.73    1.60
   3  14   3   18.99    1.55
   3  14   3   16.24    1.40
   3  14   4   71.73    2.88
   3  14   4   56.95    2.53
  -3  14  -5    0.17    0.53
   3 -14   5    0.23    0.56
   3  14   5    0.47    0.47
   3  14   5    0.40    0.55
  -3  14  -6   29.39    2.04
   3 -14   6   24.19    1.80
   3  14   6   29.25    1.94
   3  14   6   28.19    1.93
  -3  14  -7    3.37    0.95
   3 -14   7    1.75    0.80
   3  14   7    1.85    0.72
   3  14   7    2.06    0.80
  -3  14  -8   36.56    2.34
   3 -14   8   26.60    2.02
   3  14   8   33.42    2.11
   3  14   8   32.96    2.25
  -3  14  -9    0.77    0.69
   3 -14   9    0.89    0.72
   3  14   9    1.08    0.70
   3  14   9    1.09    0.78
  -3 -14 -10   24.14    1.92
  -3 -14 -10   24.19    1.90
  -3  14 -10   22.65    1.96
   3 -14  10   18.27    1.85
   3  14  10   16.90    1.76
  -3  14 -11    1.38    0.82
   3 -14  11    0.61    0.76
   3  14  11    0.44    0.69
  -3  14 -12   20.15    1.97
   3 -14  12   19.45    2.01
   3  14  12   19.77    2.00
  -3  14 -13    0.80    0.78
   3 -14  13    0.06    0.69
   3  14  13    0.19    0.75
   3 -14  14    5.03    1.36
   3  14  14    6.48    1.49
   3 -14  15    0.48    0.89
   3  14  15    0.46    0.90
   3 -14  16    2.97    1.27
   3  14  16    2.42    1.23
  -3 -15  16   -0.10    0.75
  -3  15  16    0.56    0.98
  -3 -15  15    5.76    1.34
  -3  15  15    4.53    1.42
  -3 -15  14    0.35    0.70
  -3  15  14    0.25    0.82
  -3 -15  13    3.88    1.12
  -3  15  13    5.75    1.42
  -3 -15  12    0.19    0.61
  -3  15  12    0.40    0.80
  -3 -15  11    5.67    1.17
  -3  15  11    7.23    1.41
   3  15 -11    7.03    1.24
  -3 -15  10   -0.22    0.44
  -3  15  10   -0.39    0.59
   3  15 -10    0.42    0.59
  -3 -15   9    0.95    0.63
  -3  15   9    0.48    0.73
   3  15  -9    1.21    0.72
  -3 -15   8    0.16    0.48
  -3  15   8   -0.12    0.58
   3  15  -8    0.13    0.50
  -3 -15   7    2.82    0.76
  -3  15   7    2.17    0.72
  -3  15   7    2.68    0.92
   3  15  -7    1.95    0.75
  -3 -15   6    0.31    0.45
  -3  15   6   -0.04    0.47
  -3  15   6   -0.26    0.59
   3  15  -6    0.33    0.52
  -3  15   5    9.97    1.19
  -3  15   5    8.71    1.20
   3  15  -5    8.99    1.25
  -3  15   4    2.33    0.75
  -3  15   4    1.44    0.69
   3  15  -4    1.61    0.72
  -3  15   3   54.61    2.51
  -3  15   3   49.55    2.21
   3  15  -3   55.23    2.63
  -3  15   2   -0.12    0.43
  -3  15   2    0.26    0.53
   3  15  -2    0.12    0.49
  -3  15   1   69.79    2.88
   3  15  -1   65.40    2.84
  -3  15   0    1.22    0.66
   3  15   0    0.79    0.59
   3  15   0    1.16    0.55
  -3  15  -1   69.95    2.94
   3  15   1   70.16    2.93
   3  15   1   72.93    2.64
  -3  15  -2    1.53    0.74
   3  15   2    1.52    0.68
   3  15   2    1.83    0.65
  -3  15  -3  112.26    3.78
   3  15   3  113.37    3.71
   3  15   3  113.62    3.51
  -3  15  -4    0.59    0.60
   3  15   4    0.78    0.56
   3  15   4    0.25    0.52
  -3  15  -5   51.11    2.67
   3 -15   5   43.29    2.30
   3  15   5   51.54    2.57
   3  15   5   47.34    2.46
  -3  15  -6    0.31    0.60
   3 -15   6    0.12    0.59
   3  15   6    0.87    0.60
   3  15   6    0.59    0.60
  -3  15  -7   83.90    3.48
   3 -15   7   73.24    3.14
   3  15   7   86.93    3.37
   3  15   7   78.83    3.34
  -3  15  -8    0.76    0.71
   3 -15   8    0.98    0.72
   3  15   8    0.31    0.57
   3  15   8   -0.09    0.62
  -3  15  -9   15.47    1.69
   3 -15   9   12.52    1.59
   3  15   9   15.85    1.62
   3  15   9   14.58    1.69
  -3 -15 -10    0.81    0.74
  -3  15 -10    0.75    0.75
   3 -15  10    0.33    0.71
   3  15  10    0.46    0.68
  -3  15 -11   17.68    1.86
   3 -15  11   14.15    1.75
   3  15  11   16.25    1.88
  -3  15 -12    0.54    0.75
   3 -15  12    0.31    0.72
   3  15  12   -0.28    0.69
  -3  15 -13    4.22    1.22
   3 -15  13    2.85    1.10
   3  15  13    4.89    1.35
   3 -15  14   -0.41    0.76
   3  15  14    0.62    0.87
   3 -15  15    0.59    0.96
   3  15  15    2.13    1.14
  -3 -16  16    1.95    1.07
  -3  16  16    2.44    1.27
  -3 -16  15    0.23    0.75
  -3  16  15    0.39    0.92
  -3 -16  14    0.63    0.79
  -3  16  14    2.23    1.17
  -3 -16  13   -0.18    0.62
  -3  16  13   -0.19    0.78
  -3 -16  12    0.75    0.74
  -3  16  12    1.31    0.99
  -3 -16  11    2.27    0.95
  -3  16  11    1.05    0.88
   3  16 -11    2.26    0.89
  -3 -16  10   -0.25    0.55
  -3  16  10   -0.07    0.72
   3  16 -10    0.28    0.60
  -3 -16   9    1.33    0.71
  -3  16   9    0.60    0.79
   3  16  -9    0.80    0.67
  -3 -16   8   -0.57    0.44
  -3  16   8    0.09    0.68
   3  16  -8    0.11    0.56
  -3  16   7    4.10    0.93
  -3  16   7    3.83    1.03
   3  16  -7    3.86    0.97
  -3  16   6   -0.01    0.51
  -3  16   6   -0.22    0.62
   3  16  -6    0.38    0.58
  -3  16   5    6.28    1.07
  -3  16   5    6.38    1.10
   3  16  -5    6.24    1.14
  -3  16   4    1.43    0.66
  -3  16   4    1.79    0.74
   3  16  -4    0.45    0.53
  -3  16   3    7.22    1.17
  -3  16   3    6.53    1.03
   3  16  -3    7.34    1.19
  -3  16   2   -0.25    0.42
   3  16  -2    0.21    0.51
  -3  16   1   18.38    1.62
   3  16  -1   17.36    1.61
  -3  16   0   13.09    1.44
   3  16   0   12.59    1.39
   3  16   0   12.36    1.20
  -3  16  -1    2.10    0.80
   3  16   1    1.73    0.71
   3  16   1    1.46    0.63
  -3  16  -2    6.95    1.20
   3  16   2    5.58    1.05
   3  16   2    6.41    1.01
  -3  16  -3   12.89    1.48
   3  16   3   10.83    1.32
   3  16   3   10.22    1.23
  -3  16  -4   41.41    2.47
   3  16   4   41.84    2.40
   3  16   4   41.93    2.31
  -3  16  -5    6.05    1.21
   3  16   5    5.72    1.09
   3  16   5    4.81    1.00
  -3  16  -6   20.08    1.86
   3 -16   6   16.72    1.65
   3  16   6   20.10    1.75
   3  16   6   17.26    1.66
  -3  16  -7    4.41    1.11
   3 -16   7    4.77    1.10
   3  16   7    5.88    1.14
   3  16   7    3.26    1.00
  -3  16  -8   18.38    1.85
   3 -16   8   15.66    1.70
   3  16   8   20.09    1.82
   3  16   8   18.09    1.82
  -3  16  -9    0.54    0.75
   3 -16   9    0.78    0.75
   3  16   9    0.21    0.65
   3  16   9    1.09    0.80
  -3  16 -10   16.00    1.83
   3 -16  10   14.45    1.75
   3  16  10   14.63    1.73
  -3  16 -11    1.18    0.90
   3 -16  11    0.85    0.83
   3  16  11    1.24    0.92
  -3  16 -12    7.42    1.49
   3 -16  12    7.11    1.48
   3  16  12    7.84    1.56
  -3  16 -13    0.43    0.77
   3 -16  13    0.47    0.80
   3  16  13    0.15    0.72
   3 -16  14    2.18    1.13
   3  16  14    4.37    1.40
   3 -16  15   -0.42    0.77
   3  16  15    0.66    0.98
  -3 -17  15    2.78    1.14
  -3  17  15    3.79    1.41
  -3 -17  14    0.34    0.75
  -3  17  14    1.01    1.00
  -3 -17  13    1.31    0.89
  -3  17  13    2.17    1.10
  -3 -17  12    1.01    0.83
  -3  17  12    0.56    0.88
  -3 -17  11    3.32    1.04
  -3  17  11    4.04    1.25
   3  17 -11    2.95    1.01
  -3 -17  10    0.41    0.65
  -3  17  10    0.55    0.81
   3  17 -10    0.54    0.73
  -3 -17   9   -0.22    0.52
  -3  17   9   -0.48    0.63
   3  17  -9    0.19    0.59
  -3  17   8    1.04    0.81
   3  17  -8    0.62    0.69
  -3  17   7    0.23    0.56
  -3  17   7    1.08    0.78
   3  17  -7    0.71    0.66
  -3  17   6    1.30    0.71
  -3  17   6    1.54    0.85
   3  17  -6    0.84    0.67
  -3  17   5    5.44    1.05
  -3  17   5    5.55    1.13
   3  17  -5    5.65    1.12
  -3  17   4    3.62    0.88
  -3  17   4    4.91    0.99
   3  17  -4    2.16    0.80
  -3  17   3   18.55    1.67
   3  17  -3   17.25    1.68
  -3  17   2    7.40    1.22
   3  17  -2    6.80    1.21
  -3  17   1   37.43    2.31
   3  17  -1   33.21    2.22
  -3  17   0    5.82    1.14
   3  17   0    5.36    1.10
  -3  17  -1   28.03    2.08
   3  17   1   26.63    2.01
   3  17   1   26.88    1.79
  -3  17  -2    8.52    1.35
   3  17   2    8.86    1.33
   3  17   2    6.16    1.02
  -3  17  -3   46.11    2.66
   3  17   3   43.35    2.53
   3  17   3   42.72    2.33
  -3  17  -4   10.16    1.49
   3  17   4    7.26    1.23
   3  17   4    8.87    1.26
  -3  17  -5   22.61    1.98
   3  17   5   21.58    1.85
   3  17   5   21.87    1.84
  -3  17  -6    5.70    1.23
   3  17   6    6.53    1.23
   3  17   6    6.23    1.21
  -3  17  -7   24.16    2.09
   3 -17   7   22.51    1.97
   3  17   7   24.79    2.02
   3  17   7   21.46    1.93
  -3  17  -8    0.55    0.74
   3 -17   8   -0.20    0.61
   3  17   8   -0.31    0.57
   3  17   8    0.18    0.59
  -3  17  -9    5.55    1.31
   3 -17   9    3.86    1.16
   3  17   9    4.78    1.20
   3  17   9    4.61    1.23
  -3  17 -10    2.80    1.10
   3 -17  10    1.19    0.88
   3  17  10    1.57    0.92
  -3  17 -11    3.84    1.20
   3 -17  11    1.74    0.99
   3  17  11    2.00    1.05
  -3  17 -12    0.15    0.79
   3 -17  12   -0.23    0.71
   3  17  12    0.89    0.86
  -3  17 -13    1.17    1.01
   3 -17  13   -0.35    0.73
   3  17  13    0.25    0.82
   3 -17  14   -0.67    0.76
   3  17  14    0.83    0.96
  -3 -18  14    1.85    1.07
  -3  18  14    2.37    1.25
  -3 -18  13    2.51    1.04
  -3  18  13    3.42    1.31
  -3 -18  12    0.18    0.75
  -3  18  12    0.61    0.87
  -3  18  11    7.50    1.49
   3  18 -11    8.93    1.51
  -3  18  10    2.74    1.09
   3  18 -10    1.77    0.92
  -3  18   9    8.60    1.50
   3  18  -9   10.75    1.59
  -3  18   8    0.20    0.77
   3  18  -8    0.42    0.69
  -3  18   7   22.72    1.87
  -3  18   7   20.37    1.94
   3  18  -7   23.58    2.05
  -3  18   6    2.19    0.87
  -3  18   6    1.71    0.87
   3  18  -6    1.63    0.80
  -3  18   5   17.98    1.68
  -3  18   5   16.11    1.60
   3  18  -5   15.09    1.69
  -3  18   4    3.05    0.90
   3  18  -4    1.24    0.71
  -3  18   3   36.10    2.32
   3  18  -3   31.03    2.26
  -3  18   2    4.79    1.08
   3  18  -2    3.72    1.04
  -3  18   1   20.86    1.84
   3  18  -1   19.93    1.84
  -3  18   0   10.21    1.46
   3  18   0   10.19    1.45
  -3  18  -1    8.29    1.36
   3  18   1    9.95    1.43
  -3  18  -2    5.32    1.17
   3  18   2    6.15    1.19
   3  18   2    5.17    1.02
  -3  18  -3    5.20    1.18
   3  18   3    4.56    1.06
   3  18   3    5.97    1.07
  -3  18  -4   19.12    1.88
   3  18   4   17.71    1.74
   3  18   4   16.20    1.61
  -3  18  -5    0.22    0.69
   3  18   5    0.98    0.71
   3  18   5    1.41    0.77
  -3  18  -6    7.40    1.42
   3  18   6    6.91    1.28
   3  18   6    6.00    1.20
  -3  18  -7    1.04    0.84
   3  18   7    1.14    0.79
   3  18   7    0.98    0.75
  -3  18  -8    7.16    1.46
   3 -18   8    5.34    1.25
   3  18   8    7.38    1.40
   3  18   8    5.69    1.30
  -3  18  -9    2.59    1.08
   3 -18   9    2.18    1.05
   3  18   9    3.61    1.12
   3  18   9    2.78    1.06
  -3  18 -10    4.75    1.29
   3 -18  10    5.50    1.34
   3  18  10    6.03    1.40
  -3  18 -11    3.60    1.23
   3 -18  11    3.10    1.20
   3  18  11    3.33    1.20
  -3  18 -12    6.47    1.54
   3 -18  12    4.06    1.34
   3  18  12    5.16    1.44
   3 -18  13    2.53    1.17
   3  18  13    3.65    1.30
  -3  19  13    0.72    1.01
  -3  19  12    1.38    1.10
  -3  19  11    0.71    0.89
   3  19 -11    0.81    0.83
  -3  19  10    0.98    0.88
   3  19 -10    1.90    0.96
  -3  19   9    0.10    0.77
   3  19  -9    0.19    0.68
  -3  19   8   -0.13    0.67
   3  19  -8    0.48    0.78
  -3  19   7    0.23    0.73
   3  19  -7    0.35    0.69
  -3  19   6    0.33    0.62
  -3  19   6   -0.18    0.66
   3  19  -6    0.50    0.73
  -3  19   5    0.10    0.60
   3  19  -5    0.79    0.74
  -3  19   4    4.11    1.04
   3  19  -4    1.52    0.77
  -3  19   3    3.16    0.97
   3  19  -3    1.63    0.86
  -3  19   2    2.82    0.95
   3  19  -2    1.56    0.87
  -3  19   1    7.44    1.33
   3  19  -1    5.53    1.19
  -3  19   0    2.04    0.91
   3  19   0    3.00    0.96
  -3  19  -1    3.82    1.06
   3  19   1    2.87    0.95
  -3  19  -2    1.27    0.81
   3  19   2    1.31    0.77
  -3  19  -3    6.68    1.33
   3  19   3    8.48    1.40
   3  19   3    5.85    1.15
  -3  19  -4    3.30    1.07
   3  19   4    4.06    1.09
   3  19   4    3.59    0.99
  -3  19  -5    6.06    1.36
   3  19   5    4.63    1.16
   3  19   5    6.24    1.22
  -3  19  -6    0.66    0.80
   3  19   6    0.75    0.77
   3  19   6    0.53    0.66
  -3  19  -7    8.51    1.57
   3  19   7    5.98    1.28
   3  19   7    6.51    1.33
  -3  19  -8    0.43    0.77
   3  19   8   -0.13    0.65
   3  19   8   -0.46    0.61
  -3  19  -9    1.46    0.98
   3 -19   9    0.84    0.91
   3  19   9    1.06    0.94
   3  19   9    1.72    0.99
  -3  19 -10    0.86    0.88
   3 -19  10   -0.14    0.81
   3  19  10    0.02    0.78
  -3  19 -11    1.33    1.02
   3 -19  11    1.15    1.02
   3  19  11    1.53    0.98
   3 -19  12    0.33    0.90
   3  19  12    0.76    0.82
  -3  20  12    1.96    1.17
  -3  20  11    5.64    1.47
   3  20 -11    6.58    1.47
  -3  20  10    1.07    0.97
   3  20 -10    0.80    0.86
  -3  20   9   10.25    1.68
   3  20  -9    9.78    1.63
  -3  20   8    0.94    0.87
   3  20  -8    1.71    0.95
  -3  20   7   15.53    1.79
   3  20  -7   16.75    1.90
  -3  20   6    0.22    0.65
   3  20  -6    0.72    0.75
  -3  20   5   13.88    1.66
   3  20  -5   13.99    1.74
  -3  20   4    0.91    0.70
   3  20  -4    0.23    0.69
  -3  20   3   24.66    2.10
   3  20  -3   25.70    2.22
  -3  20   2    0.15    0.61
   3  20  -2    0.55    0.68
  -3  20   1   18.95    1.90
   3  20  -1   15.05    1.75
  -3  20   0    1.02    0.75
   3  20   0    0.22    0.61
  -3  20  -1    7.61    1.42
   3  20   1    8.54    1.45
  -3  20  -2    0.89    0.83
   3  20   2    0.59    0.66
  -3  20  -3    8.39    1.51
   3  20   3    6.67    1.32
  -3  20  -4    2.06    0.99
   3  20   4    1.62    0.88
  -3  20  -5    2.49    1.08
   3  20   5    1.34    0.84
   3  20   5    0.86    0.76
  -3  20  -6    2.42    1.07
   3  20   6    3.02    1.08
   3  20   6    2.57    1.01
  -3  20  -7    0.58    0.84
   3  20   7    0.07    0.69
   3  20   7   -0.08    0.64
  -3  20  -8    3.22    1.18
   3  20   8    1.89    0.98
   3  20   8    2.24    1.05
  -3  20  -9    1.21    0.99
   3  20   9   -0.09    0.75
   3 -20  10    2.93    1.20
   3  20  10    2.25    1.11
   3 -20  11    0.41    0.98
   3  20  11    0.04    0.81
  -3  21  10    3.33    1.32
  -3  21   9    0.34    0.89
   3  21  -9   -0.05    0.79
   3  21  -8    2.48    1.08
   3  21  -7   -0.22    0.72
  -3  21   6    0.43    0.72
   3  21  -6    0.01    0.76
  -3  21   5    0.21    0.65
   3  21  -5   -0.41    0.65
  -3  21   4    4.55    1.21
   3  21  -4    3.15    1.08
  -3  21   3    0.38    0.65
   3  21  -3    0.72    0.82
  -3  21   2    0.90    0.82
   3  21  -2    0.24    0.74
  -3  21   1    0.45    0.74
   3  21  -1    0.74    0.78
  -3  21   0    0.89    0.80
   3  21   0    1.44    0.92
  -3  21  -1   -0.04    0.66
   3  21   1    0.04    0.60
  -3  21  -2    2.87    1.11
   3  21   2    3.26    1.07
  -3  21  -3    2.13    1.05
   3  21   3    2.52    1.01
  -3  21  -4    2.94    1.11
   3  21   4    3.38    1.11
  -3  21  -5    1.28    0.91
   3  21   5    0.81    0.82
  -3  21  -6    0.66    0.85
   3  21   6    0.62    0.86
   3  21   6    0.20    0.67
  -3  21  -7    2.25    1.13
   3  21   7    2.72    1.14
   3  21   7    2.57    1.11
   3  21   8   -0.16    0.79
   3  21   8    0.49    0.87
   3  21   9    0.18    0.83
   3  22  -6    1.05    0.91
  -3  22   5   27.38    2.40
   3  22  -5   24.26    2.36
  -3  22   4    1.86    0.97
   3  22  -4    0.59    0.83
  -3  22   3   26.73    2.36
   3  22  -3   29.54    2.54
  -3  22   2    0.88    0.82
   3  22  -2    0.76    0.83
  -3  22   1   14.75    1.94
   3  22  -1   18.45    2.05
  -3  22   0   -0.11    0.66
   3  22   0    0.68    0.84
  -3  22  -1    6.01    1.43
   3  22   1    7.46    1.50
  -3  22  -2    0.52    0.84
   3  22   2    0.72    0.77
  -3  22  -3    4.08    1.30
   3  22   3    4.61    1.25
  -3  22  -4    0.11    0.78
   3  22   4   -0.47    0.66
   3  22   5    0.72    0.88
   3  22   6    0.29    0.82
   3  22   7    0.28    0.84
   3  22   7    0.14    0.81
   3  22   8    0.99    1.07
  -3  23   5    0.25    0.82
  -3  23   4    2.90    1.11
  -3  23   3   -0.28    0.74
  -3  23   2    0.60    0.85
  -3  23   1    0.24    0.76
  -3  23   0    2.49    1.13
  -4   0  21   -0.44    0.73
  -4   0  20    1.89    1.03
  -4   0  19    0.19    0.66
  -4   0  18    0.60    0.73
  -4   0  17   -0.81    0.65
  -4   0  17   -0.45    0.42
  -4   0  16    0.68    0.78
  -4   0  16    1.38    0.76
  -4   0  15    0.05    0.62
  -4   0  15   -0.14    0.44
  -4   0  14   -0.40    0.53
  -4   0  14    0.43    0.52
  -4   0  13    0.15    0.55
  -4   0  13    0.23    0.39
  -4   0  12    3.72    0.82
  -4   0  12    3.82    0.81
  -4   0  11    0.22    0.46
  -4   0  11   -0.12    0.31
  -4   0  10    4.98    0.80
  -4   0   9    0.52    0.40
  -4   0   8   73.32    2.19
  -4   0   7    0.26    0.26
  -4   0   6  117.13    2.48
  -4   0   5    0.17    0.11
  -4   0   5    0.02    0.17
  -4   0   4  217.26    2.09
  -4   0   4  243.97    3.25
  -4   0   3    0.23    0.14
  -4   0   3    0.01    0.12
  -4   0   2   30.13    0.89
  -4   0   2   29.77    1.05
  -4   0   1    0.14    0.16
  -4   0   0 1414.40    9.16
  -4   0  -1    0.18    0.22
  -4   0  -2   49.62    1.47
  -4   0  -3    0.55    0.28
  -4   0  -4  182.22    3.03
   4   0   4  199.61    2.99
  -4   0  -5    0.26    0.29
   4   0   5   -0.03    0.22
   4   0   5   -0.07    0.28
  -4   0  -6   75.45    2.16
   4   0   6   95.25    2.24
   4   0   6   83.82    2.20
  -4   0  -7   -0.05    0.34
   4   0   7    0.25    0.32
   4   0   7    0.41    0.41
  -4   0  -8   50.43    1.94
   4   0   8   54.87    1.91
   4   0   8   45.47    1.84
  -4   0  -9    0.12    0.49
   4   0   9   -0.15    0.34
   4   0   9    0.05    0.40
  -4   0 -10   11.99    1.21
   4   0  10   12.83    1.09
   4   0  10   11.80    1.16
  -4   0 -11   -0.66    0.50
   4   0  11   -0.21    0.40
   4   0  11   -0.10    0.43
  -4   0 -12    2.42    0.87
   4   0  12    2.69    0.73
   4   0  12    3.07    0.85
   4   0  13   -0.05    0.48
   4   0  13    0.18    0.56
   4   0  14    1.92    0.86
   4   0  15    0.21    0.69
   4   0  16    0.65    0.76
   4   0  17   -0.69    0.65
  -4  -1  21    3.15    1.23
  -4   1  21    3.79    1.33
  -4  -1  20   -0.57    0.66
  -4   1  20   -0.24    0.70
  -4  -1  19    1.27    0.91
  -4   1  19    2.15    1.05
  -4  -1  18    0.42    0.67
  -4   1  18    0.38    0.66
  -4  -1  17    1.21    0.76
  -4   1  17    0.94    0.91
  -4   1  17    1.45    0.80
  -4  -1  16   -0.08    0.66
  -4  -1  16   -0.01    0.52
  -4   1  16    0.36    0.77
  -4   1  16    0.26    0.55
  -4  -1  15    0.70    0.66
  -4  -1  15    0.06    0.50
  -4   1  15    0.48    0.73
  -4   1  15    0.12    0.52
  -4  -1  14    0.06    0.55
  -4  -1  14    0.32    0.49
  -4   1  14    0.07    0.60
  -4   1  14    0.91    0.56
  -4  -1  13   -0.29    0.47
  -4  -1  13    0.36    0.42
  -4   1  13   -0.17    0.53
  -4   1  13   -0.04    0.35
  -4  -1  12    0.47    0.49
  -4  -1  12    0.35    0.42
  -4   1  12    0.48    0.56
  -4   1  12    0.37    0.44
  -4  -1  11    5.14    0.82
  -4  -1  11    4.05    0.79
  -4   1  11    4.15    0.82
  -4  -1  10    1.35    0.51
  -4  -1  10    1.20    0.49
  -4   1  10    1.35    0.58
  -4  -1   9    0.20    0.31
  -4   1   9    0.37    0.37
  -4  -1   8    0.07    0.26
  -4   1   8    0.20    0.30
  -4  -1   7   14.63    0.95
  -4   1   7   15.01    1.00
  -4  -1   6    0.37    0.23
  -4  -1   6    0.27    0.12
  -4   1   6    0.38    0.27
  -4  -1   5    2.66    0.29
  -4  -1   5    3.11    0.45
  -4  -1   5    2.01    0.24
  -4   1   5    2.68    0.27
  -4   1   5    3.05    0.48
  -4  -1   4    0.47    0.16
  -4  -1   4    0.42    0.22
  -4  -1   4    0.61    0.17
  -4   1   4    0.40    0.17
  -4   1   4    0.60    0.25
  -4  -1   3   30.28    0.86
  -4  -1   3   26.71    1.03
  -4   1   3   27.37    0.78
  -4   1   3   22.80    0.98
  -4  -1   2    2.82    0.34
  -4   1   2    3.19    0.39
  -4   1   2    2.95    0.39
  -4  -1   1    6.36    0.50
  -4  -1   0   47.40    1.30
  -4   1   0   47.13    1.29
  -4  -1  -1  157.90    2.46
  -4   1  -1  145.08    2.36
  -4  -1  -2   10.38    0.72
  -4   1  -2    9.53    0.74
  -4  -1  -3   38.64    1.38
  -4   1  -3   34.95    1.33
  -4  -1  -4    0.08    0.23
  -4   1  -4    0.42    0.31
   4  -1   4    0.36    0.32
   4   1   4    0.36    0.26
   4   1   4    0.13    0.27
  -4  -1  -5   23.81    1.20
  -4   1  -5   22.55    1.20
   4  -1   5   27.30    1.28
   4   1   5   31.77    1.31
   4   1   5   26.45    1.18
  -4  -1  -6    0.82    0.41
  -4   1  -6    0.79    0.45
   4  -1   6    0.08    0.26
   4  -1   6    0.53    0.40
   4   1   6    0.48    0.35
   4   1   6    0.55    0.37
  -4  -1  -7   71.60    2.18
  -4   1  -7   65.75    2.13
   4  -1   7   89.59    2.20
   4  -1   7   77.71    2.32
   4   1   7   91.26    2.40
   4   1   7   76.35    2.16
  -4  -1  -8    0.31    0.40
  -4   1  -8    0.23    0.42
   4  -1   8    0.56    0.37
   4  -1   8    0.46    0.42
   4   1   8   -0.30    0.34
   4   1   8    0.49    0.43
  -4  -1  -9   13.91    1.20
  -4   1  -9   12.65    1.18
   4  -1   9   15.90    1.10
   4  -1   9   13.73    1.19
   4   1   9   16.71    1.21
   4   1   9   13.84    1.14
  -4  -1 -10    0.10    0.51
  -4   1 -10    0.66    0.59
   4  -1  10    0.54    0.45
   4  -1  10    0.21    0.43
   4   1  10    0.32    0.47
   4   1  10    0.80    0.54
  -4  -1 -11    9.82    1.17
  -4   1 -11    7.04    1.08
   4  -1  11    9.76    0.97
   4  -1  11    9.19    1.14
   4   1  11   10.94    1.11
   4   1  11    6.50    0.97
  -4  -1 -12    0.43    0.63
  -4   1 -12    1.50    0.78
   4  -1  12    1.47    0.61
   4  -1  12    1.17    0.67
   4   1  12    1.34    0.64
   4   1  12    1.01    0.67
   4  -1  13    5.45    1.08
   4   1  13    5.34    0.96
   4   1  13    4.63    1.01
   4  -1  14    1.22    0.74
   4   1  14    1.29    0.71
   4   1  14    1.71    0.78
   4  -1  15   -0.31    0.63
   4   1  15   -0.10    0.66
   4  -1  16    0.36    0.76
   4   1  16   -0.16    0.62
   4  -1  17   -0.17    0.73
   4  -1  18   -0.03    0.82
   4  -1  19    0.46    1.03
  -4  -2  21    0.09    0.86
  -4   2  21    0.34    0.86
  -4  -2  20    0.67    0.82
  -4   2  20    0.98    0.92
  -4  -2  19    0.42    0.72
  -4   2  19    0.70    0.82
  -4  -2  18    1.38    0.88
  -4   2  18    0.94    0.87
  -4   2  18    1.95    0.89
  -4  -2  17    0.12    0.55
  -4   2  17   -0.56    0.66
  -4   2  17    0.19    0.53
  -4  -2  16   -0.33    0.46
  -4   2  16    0.84    0.81
  -4   2  16   -0.04    0.47
  -4  -2  15    4.51    1.00
  -4  -2  15    3.85    1.00
  -4   2  15    4.05    1.09
  -4   2  15    3.27    0.92
  -4  -2  14    0.30    0.60
  -4  -2  14   -0.09    0.40
  -4   2  14    0.53    0.68
  -4   2  14    0.63    0.54
  -4  -2  13   -0.05    0.51
  -4  -2  13   -0.12    0.34
  -4   2  13   -0.58    0.39
  -4   2  13   -0.06    0.34
  -4  -2  12    4.52    0.81
  -4  -2  12    4.16    0.85
  -4   2  12    5.26    0.97
  -4   2  12    6.26    0.94
  -4  -2  11    2.15    0.63
  -4  -2  11    1.73    0.60
  -4   2  11    1.24    0.62
  -4  -2  10   18.80    1.28
  -4  -2  10   16.41    1.26
  -4   2  10   16.76    1.32
  -4  -2   9    0.03    0.30
  -4   2   9   -0.08    0.32
  -4  -2   8   55.46    1.83
  -4   2   8   51.54    1.97
   4   2  -8   54.76    1.09
  -4  -2   7    2.11    0.44
  -4   2   7    3.19    0.63
   4   2  -7    2.64    0.32
  -4  -2   6  204.46    3.15
  -4   2   6  198.06    3.38
   4   2  -6  190.45    2.14
  -4  -2   5    1.04    0.30
  -4   2   5    1.64    0.23
  -4   2   5    0.99    0.34
   4   2  -5    1.02    0.25
  -4  -2   4  196.01    2.85
  -4   2   4  163.18    1.82
  -4   2   4  168.05    2.81
   4   2  -4  174.07    2.17
  -4  -2   3    7.52    0.57
  -4  -2   3    4.45    0.39
  -4   2   3    4.41    0.44
  -4   2   3    4.30    0.50
   4   2  -3    4.98    0.44
  -4  -2   2   37.79    1.09
  -4  -2   2   34.98    1.05
  -4   2   2   32.45    0.99
  -4   2   2   35.64    1.18
  -4  -2   1    7.41    0.57
  -4  -2   1    6.98    0.54
  -4   2   1    7.55    0.63
  -4   2   1    7.54    0.57
  -4  -2   0 1081.74    6.56
  -4  -2   0 1049.79    6.46
  -4   2   0  972.13    6.10
  -4   2   0 1064.40    6.18
  -4  -2  -1    3.73    0.47
  -4   2  -1    3.24    0.49
  -4  -2  -2   23.83    1.06
  -4   2  -2   21.26    1.05
  -4  -2  -3    0.58    0.26
  -4   2  -3    0.84    0.35
   4   2   3    0.12    0.23
  -4  -2  -4  167.32    2.94
  -4   2  -4  152.24    2.85
   4  -2   4  168.16    2.97
   4   2   4  167.37    2.91
  -4  -2  -5    0.56    0.33
  -4   2  -5    0.75    0.39
   4  -2   5    0.42    0.39
   4   2   5    0.42    0.33
   4   2   5    0.66    0.34
  -4  -2  -6   37.50    1.57
  -4   2  -6   33.14    1.54
   4  -2   6   30.82    1.48
   4   2   6   33.17    1.45
   4   2   6   32.23    1.31
  -4  -2  -7    6.69    0.84
  -4   2  -7    5.59    0.83
   4  -2   7    7.29    0.68
   4  -2   7    5.31    0.78
   4   2   7    5.68    0.75
   4   2   7    6.05    0.74
  -4  -2  -8   60.50    2.09
  -4   2  -8   55.10    2.08
   4  -2   8   70.14    1.96
   4  -2   8   59.18    2.20
   4   2   8   65.31    2.22
   4   2   8   62.69    2.03
  -4  -2  -9    7.61    0.96
  -4   2  -9    7.53    1.02
   4  -2   9    9.16    0.84
   4  -2   9    7.53    0.99
   4   2   9    8.88    0.97
   4   2   9    9.46    0.99
  -4  -2 -10    5.67    0.92
  -4   2 -10    5.07    0.95
   4  -2  10    5.41    0.75
   4  -2  10    4.32    0.85
   4   2  10    5.13    0.86
   4   2  10    3.72    0.75
  -4   2 -11    5.68    1.01
   4  -2  11    8.72    0.93
   4  -2  11    4.98    0.93
   4   2  11    6.38    0.98
   4   2  11    5.51    0.90
  -4  -2 -12    1.15    0.71
  -4   2 -12    0.35    0.70
   4  -2  12    1.15    0.70
   4   2  12    0.87    0.64
   4   2  12    1.16    0.67
  -4   2 -13    8.00    1.25
   4  -2  13    6.28    1.14
   4   2  13    8.77    1.19
   4   2  13    8.18    1.16
   4  -2  14    0.56    0.69
   4   2  14    0.52    0.67
   4   2  14    0.46    0.63
   4  -2  15    1.87    0.92
   4   2  15    2.51    0.94
   4  -2  16    0.05    0.70
   4  -2  17    0.16    0.79
   4  -2  18   -0.11    0.84
   4  -2  19   -0.35    0.84
  -4  -3  21    1.18    1.03
  -4  -3  20    2.28    1.08
  -4   3  20    1.02    0.96
  -4  -3  19   -0.36    0.57
  -4   3  19    0.20    0.86
  -4   3  19   -0.42    0.60
  -4  -3  18    2.40    0.99
  -4   3  18    4.15    1.23
  -4   3  18    2.88    1.00
  -4  -3  17   -0.03    0.56
  -4   3  17   -0.18    0.76
  -4   3  17   -0.22    0.51
  -4  -3  16    8.63    1.38
  -4   3  16    9.57    1.47
  -4   3  16    6.47    1.16
  -4  -3  15   -0.08    0.47
  -4   3  15   -0.40    0.69
  -4   3  15   -0.16    0.41
  -4  -3  14   18.36    1.66
  -4   3  14   16.91    1.66
  -4   3  14   17.63    1.54
  -4  -3  13    1.56    0.68
  -4  -3  13    1.87    0.73
  -4   3  13    1.08    0.73
  -4   3  13    1.26    0.59
  -4  -3  12   11.67    1.16
  -4  -3  12   11.19    1.20
  -4   3  12   13.80    1.40
  -4  -3  11    2.53    0.63
  -4  -3  11    1.80    0.60
  -4   3  11    2.45    0.73
  -4  -3  10    9.60    0.92
  -4  -3  10   10.15    1.04
  -4   3  10   10.66    1.14
  -4  -3   9    1.12    0.41
  -4  -3   9    0.75    0.39
  -4   3   9    0.88    0.50
   4   3  -9    0.98    0.27
  -4  -3   8   36.78    1.46
  -4   3   8   33.31    1.62
   4   3  -8   38.12    1.09
  -4   3   7    7.89    0.85
   4   3  -7    9.59    0.59
  -4  -3   6    3.95    0.51
  -4   3   6    3.59    0.57
   4   3  -6    3.37    0.41
  -4  -3   5    0.54    0.23
  -4   3   5    0.86    0.21
  -4   3   5    0.42    0.30
   4   3  -5    0.37    0.21
  -4  -3   4   18.91    0.90
  -4   3   4   17.72    0.70
  -4   3   4   15.78    0.93
   4   3  -4   17.77    0.78
  -4   3   3    8.54    0.60
  -4   3   3    7.09    0.63
   4   3  -3    7.75    0.57
  -4   3   2    4.09    0.48
  -4   3   2    3.31    0.43
   4   3  -2    4.11    0.46
  -4   3   1   20.22    0.92
  -4   3   1   20.59    0.88
   4   3  -1   23.42    0.98
  -4  -3   0   30.78    1.14
  -4  -3   0   31.26    1.14
  -4   3   0   29.62    1.14
  -4   3   0   34.56    1.08
  -4  -3  -1   45.92    1.43
  -4  -3  -1   42.94    1.38
  -4   3  -1   39.07    1.35
  -4  -3  -2   17.21    0.93
  -4  -3  -2   16.68    0.91
  -4   3  -2   14.21    0.91
  -4  -3  -3   39.26    1.43
  -4   3  -3   39.39    1.49
   4  -3   3   20.58    1.10
   4   3   3   24.36    1.14
  -4  -3  -4   23.00    1.15
  -4   3  -4   20.72    1.17
   4  -3   4   24.56    1.26
   4   3   4   25.77    1.23
  -4  -3  -5   38.24    1.52
  -4   3  -5   34.41    1.53
   4  -3   5   37.30    1.59
   4   3   5   41.79    1.62
   4   3   5   39.02    1.28
   4  -3   6    1.02    0.50
   4   3   6    1.21    0.46
   4   3   6    1.47    0.43
  -4  -3  -7   18.86    1.20
  -4   3  -7   17.62    1.26
   4  -3   7   18.54    1.28
   4   3   7   20.61    1.27
   4   3   7   20.43    1.11
  -4  -3  -8   37.65    1.71
  -4   3  -8   35.21    1.77
   4  -3   8   45.64    1.53
   4  -3   8   36.52    1.82
   4   3   8   45.47    1.94
   4   3   8   41.23    1.62
  -4  -3  -9   11.37    1.09
  -4   3  -9   10.94    1.21
   4  -3   9   11.83    0.88
   4  -3   9   11.51    1.16
   4   3   9   13.01    1.17
   4   3   9   12.68    1.06
  -4  -3 -10    8.74    1.06
  -4   3 -10    9.64    1.21
   4  -3  10    9.94    0.89
   4  -3  10    9.82    1.18
   4   3  10    7.91    1.04
   4   3  10    9.10    0.99
  -4  -3 -11    0.63    0.53
  -4   3 -11    0.66    0.69
   4  -3  11    0.53    0.56
   4   3  11    0.69    0.56
   4   3  11    0.12    0.46
  -4  -3 -12    3.38    0.88
  -4   3 -12    4.13    1.00
   4  -3  12    4.56    0.98
   4   3  12    4.73    0.94
   4   3  12    3.54    0.83
  -4   3 -13   -0.10    0.67
   4  -3  13   -0.11    0.56
   4   3  13   -0.11    0.55
   4   3  13    0.20    0.57
   4  -3  14    5.35    1.13
   4   3  14    8.32    1.29
   4  -3  15   -0.36    0.62
   4   3  15    0.57    0.71
   4  -3  16    0.08    0.72
   4   3  16    1.37    0.89
   4  -3  17    0.70    0.91
   4  -3  18   -0.72    0.76
   4  -3  19   -0.29    0.94
  -4  -4  21    4.55    1.42
  -4  -4  20    0.23    0.76
  -4   4  20   -0.02    0.91
  -4  -4  19    3.23    1.14
  -4   4  19    2.11    1.15
  -4   4  19    2.88    1.06
  -4  -4  18    0.42    0.66
  -4   4  18    0.80    0.87
  -4   4  18    0.51    0.70
  -4  -4  17    4.70    1.17
  -4   4  17    5.27    1.29
  -4   4  17    5.60    1.13
  -4  -4  16    2.23    0.89
  -4   4  16    3.01    1.06
  -4   4  16    2.05    0.80
  -4  -4  15    7.80    1.28
  -4   4  15   10.11    1.47
  -4   4  15   12.01    1.36
  -4  -4  14    0.58    0.58
  -4   4  14    0.87    0.72
  -4   4  14    0.10    0.47
  -4  -4  13    1.95    0.71
  -4   4  13    3.43    0.96
  -4   4  13    3.43    0.80
  -4  -4  12   20.20    1.39
  -4  -4  12   20.16    1.57
  -4   4  12   21.78    1.68
  -4  -4  11    8.79    0.96
  -4  -4  11    5.79    0.92
  -4   4  11    6.21    0.99
  -4  -4  10    4.09    0.66
  -4  -4  10    3.58    0.71
  -4   4  10    5.03    0.88
  -4  -4   9    0.85    0.39
  -4  -4   9    0.95    0.43
  -4   4   9    0.79    0.49
   4   4  -9    0.90    0.32
  -4  -4   8   90.09    2.22
  -4  -4   8   93.99    2.70
  -4   4   8   96.72    2.77
   4   4  -8  102.54    1.97
  -4   4   7    2.19    0.53
   4   4  -7    1.93    0.38
  -4  -4   6   61.06    1.69
  -4   4   6   70.44    1.21
  -4   4   6   48.34    1.80
   4   4  -6   57.39    1.48
  -4  -4   5    0.32    0.22
  -4   4   5    0.36    0.19
  -4   4   5    0.41    0.32
   4   4  -5    0.31    0.22
  -4   4   4   98.17    1.67
  -4   4   4   89.52    2.17
   4   4  -4   93.70    1.89
  -4   4   3    0.95    0.33
  -4   4   3    0.87    0.31
   4   4  -3    0.88    0.29
  -4   4   2   95.97    1.86
  -4   4   2   99.36    2.04
   4   4  -2  103.15    2.05
  -4   4   1   18.28    0.94
  -4   4   1   19.23    0.88
   4   4  -1   18.38    0.93
  -4   4   0  257.82    3.32
  -4   4   0  274.42    3.05
   4   4   0  278.39    3.54
  -4  -4  -1    3.74    0.51
  -4  -4  -1    4.19    0.52
  -4   4  -1    3.43    0.56
  -4   4  -1    3.38    0.38
  -4  -4  -2  131.37    2.57
  -4  -4  -2  128.15    2.54
  -4   4  -2  119.79    2.49
  -4   4  -2  129.34    1.94
   4   4   2  126.72    2.53
  -4  -4  -3    0.55    0.29
  -4   4  -3    0.61    0.35
   4  -4   3    0.49    0.35
   4   4   3    0.27    0.27
  -4  -4  -4   50.99    1.72
  -4   4  -4   45.17    1.70
   4  -4   4   47.09    1.74
   4   4   4   49.83    1.73
  -4  -4  -5    3.81    0.62
  -4   4  -5    3.20    0.66
   4  -4   5    3.70    0.66
   4   4   5    3.44    0.59
  -4  -4  -6   55.09    1.91
  -4   4  -6   48.63    1.92
   4  -4   6   49.50    1.94
   4   4   6   60.50    2.10
   4   4   6   54.96    1.53
  -4  -4  -7   14.65    1.09
  -4   4  -7   13.80    1.18
   4  -4   7   15.03    1.21
   4   4   7   15.50    1.15
   4   4   7   14.67    0.94
  -4  -4  -8   24.80    1.43
  -4   4  -8   20.96    1.48
   4  -4   8   22.84    1.51
   4   4   8   27.35    1.59
   4   4   8   23.33    1.23
  -4  -4  -9   39.59    1.82
  -4   4  -9   35.46    1.88
   4  -4   9   35.26    1.92
   4   4   9   43.74    2.06
   4   4   9   37.35    1.61
  -4  -4 -10    8.97    1.08
  -4   4 -10    8.09    1.13
   4  -4  10    8.38    1.14
   4   4  10    9.25    1.11
   4   4  10    9.20    1.00
  -4  -4 -11   19.30    1.45
  -4   4 -11   19.34    1.57
   4  -4  11   16.13    1.49
   4   4  11   20.61    1.58
   4   4  11   18.67    1.34
  -4  -4 -12    0.62    0.59
  -4   4 -12    0.01    0.65
   4  -4  12    0.11    0.54
   4   4  12    0.44    0.58
  -4   4 -13   19.20    1.67
   4  -4  13   18.24    1.71
   4   4  13   21.40    1.78
   4  -4  14    0.76    0.76
   4   4  14    0.75    0.76
   4  -4  15   15.36    1.74
   4   4  15   15.56    1.67
   4  -4  16    0.02    0.72
   4   4  16    0.34    0.77
   4  -4  17    5.15    1.35
   4   4  17    7.02    1.41
   4  -4  18   -0.64    0.76
   4  -4  19    1.16    1.13
  -4  -5  20    3.06    1.23
  -4   5  20    2.64    1.29
  -4  -5  19    1.14    0.88
  -4   5  19    1.16    1.05
  -4  -5  18    4.76    1.27
  -4   5  18    6.14    1.40
  -4  -5  17    0.62    0.72
  -4   5  17    0.94    0.93
  -4   5  17    0.73    0.64
  -4  -5  16    8.85    1.41
  -4   5  16   10.38    1.58
  -4   5  16   11.04    1.42
  -4  -5  15    0.00    0.54
  -4   5  15    0.72    0.77
  -4   5  15    0.37    0.55
  -4  -5  14   46.49    2.57
  -4   5  14   54.36    2.80
  -4   5  14   52.20    2.48
  -4  -5  13    0.65    0.56
  -4   5  13    0.63    0.70
  -4   5  13   -0.08    0.42
  -4  -5  12   21.10    1.62
  -4   5  12   22.93    1.77
  -4  -5  11    0.88    0.51
  -4  -5  11    0.14    0.33
  -4   5  11    1.17    0.67
  -4  -5  10   71.58    2.14
  -4  -5  10   79.88    2.79
  -4   5  10   70.69    2.65
  -4  -5   9    1.35    0.42
  -4  -5   9    0.97    0.48
  -4   5   9    0.99    0.57
   4   5  -9    1.42    0.41
  -4  -5   8  108.74    2.39
  -4  -5   8   94.06    2.74
  -4   5   8  137.00    1.70
  -4   5   8  107.26    3.00
   4   5  -8  112.12    2.26
  -4  -5   7    1.05    0.33
  -4  -5   7    0.93    0.38
  -4   5   7    0.45    0.20
  -4   5   7    1.24    0.48
   4   5  -7    1.28    0.35
  -4  -5   6  102.99    2.17
  -4  -5   6   84.77    2.33
  -4   5   6  112.89    1.77
  -4   5   6   81.84    2.38
   4   5  -6   92.86    2.04
  -4  -5   5    0.03    0.18
  -4   5   5   -0.12    0.17
  -4   5   5   -0.02    0.29
   4   5  -5    0.22    0.23
  -4   5   4   87.07    1.73
  -4   5   4   77.63    2.09
   4   5  -4   87.46    1.98
  -4   5   3    0.65    0.31
  -4   5   3    0.72    0.32
   4   5  -3    1.24    0.34
  -4   5   2   51.77    1.49
  -4   5   2   50.89    1.52
   4   5  -2   54.38    1.61
  -4   5   1   20.96    1.04
  -4   5   1   22.00    0.96
   4   5  -1   23.72    1.10
  -4   5   0   58.45    1.70
  -4   5   0   60.02    1.45
   4   5   0   63.10    1.79
  -4   5  -1   10.69    0.87
  -4   5  -1    8.82    0.56
   4   5   1    9.55    0.77
  -4  -5  -2    1.94    0.41
  -4   5  -2    2.17    0.51
  -4   5  -2    2.47    0.32
   4   5   2    1.95    0.43
   4   5   2    2.27    0.45
  -4  -5  -3   16.94    1.03
  -4  -5  -3   15.22    0.98
  -4   5  -3   15.82    1.09
  -4   5  -3   17.29    0.70
   4  -5   3   14.16    1.02
   4   5   3   15.24    0.99
  -4  -5  -4    1.51    0.44
  -4  -5  -4    1.42    0.41
  -4   5  -4    1.43    0.52
   4  -5   4    1.86    0.53
   4   5   4    1.59    0.46
  -4  -5  -5   20.62    1.19
  -4   5  -5   19.90    1.29
   4  -5   5   18.99    1.24
   4   5   5   20.46    1.23
  -4  -5  -6    8.54    0.86
  -4   5  -6    8.46    1.02
   4  -5   6    6.08    0.84
   4   5   6    4.65    0.73
   4   5   6    5.51    0.61
  -4  -5  -7    2.62    0.60
  -4   5  -7    2.62    0.68
   4  -5   7    2.47    0.67
   4   5   7    2.02    0.58
   4   5   7    2.17    0.47
   4  -5   8    7.93    1.04
   4   5   8    8.89    1.03
   4   5   8    7.91    0.79
  -4  -5  -9    9.47    1.03
  -4   5  -9    8.09    1.13
   4  -5   9    9.87    1.18
   4   5   9    8.87    1.08
   4   5   9    9.11    0.89
  -4  -5 -10   19.20    1.42
  -4   5 -10   16.47    1.48
   4  -5  10   14.06    1.38
   4   5  10   17.17    1.46
  -4  -5 -11    0.65    0.58
  -4   5 -11    0.80    0.68
   4  -5  11    0.83    0.64
   4   5  11    0.54    0.54
  -4  -5 -12    4.63    0.96
  -4   5 -12    3.29    0.96
   4  -5  12    3.12    0.95
   4   5  12    3.53    0.94
  -4   5 -13    0.40    0.74
   4  -5  13    0.06    0.60
   4   5  13   -0.02    0.65
   4  -5  14   15.53    1.70
   4   5  14   17.29    1.75
   4  -5  15   -0.10    0.73
   4   5  15   -0.21    0.64
   4  -5  16    0.11    0.78
   4   5  16    1.26    0.89
   4  -5  17   -0.03    0.83
   4   5  17    1.07    0.90
   4  -5  18   -0.63    0.82
   4   5  18    0.74    0.96
   4  -5  19    0.19    0.95
  -4  -6  20    0.02    0.81
  -4   6  20    1.22    1.18
  -4  -6  19    3.03    1.11
  -4   6  19    3.80    1.30
  -4  -6  18    0.09    0.64
  -4   6  18    0.28    0.87
  -4  -6  17    3.76    1.13
  -4   6  17    4.00    1.23
  -4  -6  16    0.52    0.66
  -4   6  16    0.64    0.86
  -4   6  16    1.16    0.69
  -4  -6  15   12.31    1.49
  -4   6  15   10.34    1.54
  -4   6  15   15.07    1.47
  -4  -6  14    2.59    0.85
  -4   6  14    2.63    0.96
  -4   6  14    3.35    0.85
  -4  -6  13    4.46    0.99
  -4   6  13    4.64    1.07
  -4  -6  12    0.04    0.37
  -4   6  12    0.29    0.66
  -4  -6  11    4.21    0.84
  -4   6  11    4.23    0.95
  -4  -6  10    3.78    0.61
  -4  -6  10    3.41    0.72
  -4   6  10    3.75    0.83
  -4  -6   9    0.60    0.37
  -4  -6   9    0.22    0.32
  -4   6   9    0.72    0.56
   4   6  -9   -0.07    0.32
  -4  -6   8   37.91    1.42
  -4  -6   8   34.70    1.71
  -4   6   8   47.95    1.19
  -4   6   8   39.27    1.93
   4   6  -8   41.69    1.52
  -4  -6   7    6.15    0.60
  -4  -6   7    4.01    0.64
  -4   6   7    5.93    0.51
  -4   6   7    3.46    0.70
   4   6  -7    6.35    0.68
  -4  -6   6    0.54    0.27
  -4  -6   6    0.14    0.25
  -4   6   6    0.77    0.27
  -4   6   6    0.58    0.45
   4   6  -6    0.23    0.32
  -4  -6   5    7.64    0.63
  -4  -6   5    7.26    0.69
  -4   6   5    8.77    0.65
  -4   6   5    5.56    0.74
   4   6  -5    6.83    0.69
  -4   6   4   64.24    1.62
  -4   6   4   53.94    1.83
   4   6  -4   61.34    1.79
  -4   6   3   10.43    0.77
  -4   6   3    9.99    0.81
   4   6  -3   10.96    0.81
  -4   6   2   53.77    1.60
  -4   6   2   48.66    1.54
   4   6  -2   55.17    1.72
  -4   6   1   16.50    0.99
  -4   6   1   15.51    0.85
   4   6  -1   17.98    1.03
  -4   6   0  166.21    2.96
  -4   6   0  166.01    2.48
   4   6   0  173.61    3.10
  -4   6  -1    2.01    0.49
  -4   6  -1    1.76    0.31
   4   6   1    2.04    0.45
  -4   6  -2   36.53    1.56
  -4   6  -2   38.17    1.06
   4   6   2   37.25    1.52
   4   6   2   35.38    1.47
   4  -6   3    3.19    0.60
   4   6   3    2.81    0.56
  -4  -6  -4   76.00    2.24
  -4  -6  -4   72.53    2.18
  -4   6  -4   71.27    2.25
   4  -6   4   66.94    2.17
   4   6   4   73.96    2.28
  -4  -6  -5    5.78    0.76
  -4  -6  -5    4.57    0.67
  -4   6  -5    5.60    0.85
   4  -6   5    5.49    0.80
   4   6   5    5.35    0.76
  -4  -6  -6    3.61    0.66
  -4  -6  -6    3.09    0.61
  -4   6  -6    3.14    0.73
   4  -6   6    2.88    0.69
   4   6   6    2.78    0.64
  -4  -6  -7   28.08    1.51
  -4   6  -7   26.70    1.62
   4  -6   7   24.99    1.57
   4   6   7   28.32    1.62
  -4  -6  -8   13.54    1.14
  -4   6  -8   10.85    1.23
   4  -6   8    9.98    1.16
   4   6   8   10.10    1.08
  -4  -6  -9   50.19    2.10
  -4   6  -9   47.23    2.21
   4  -6   9   41.86    2.17
   4   6   9   48.21    2.27
  -4  -6 -10    0.66    0.52
  -4   6 -10    0.78    0.70
   4  -6  10    1.14    0.66
   4   6  10    0.84    0.59
  -4  -6 -11   34.59    1.91
  -4   6 -11   31.42    1.97
   4  -6  11   29.43    2.01
   4   6  11   36.63    2.16
  -4   6 -12   -0.29    0.62
   4  -6  12    0.12    0.60
   4   6  12    0.38    0.64
  -4   6 -13   23.44    1.86
   4  -6  13   21.30    1.91
   4   6  13   28.35    2.10
   4  -6  14   -0.32    0.65
   4   6  14    1.14    0.82
   4  -6  15   20.70    2.03
   4   6  15   26.96    2.19
   4  -6  16    0.58    0.84
   4   6  16    0.22    0.75
   4  -6  17    5.87    1.47
   4   6  17    8.86    1.60
   4  -6  18   -0.24    0.81
   4   6  18    0.49    0.93
   4  -6  19    2.31    1.31
  -4  -7  20    2.49    1.15
  -4   7  20    5.55    1.61
  -4  -7  19    0.52    0.81
  -4   7  19    0.21    0.96
  -4  -7  18   13.91    1.88
  -4   7  18   17.55    2.07
  -4  -7  17   -0.30    0.52
  -4   7  17   -0.29    0.76
  -4  -7  16   19.50    1.91
  -4   7  16   14.82    1.83
  -4  -7  15   -0.14    0.53
  -4   7  15    0.11    0.77
  -4  -7  14   56.54    2.91
  -4   7  14   58.92    3.01
  -4   7  14   61.89    2.66
  -4  -7  13    0.40    0.53
  -4   7  13   -0.08    0.64
  -4  -7  12   60.60    2.75
  -4   7  12   57.83    2.75
  -4  -7  11    0.88    0.48
  -4   7  11    0.73    0.63
  -4  -7  10   50.92    2.31
  -4   7  10   38.34    2.09
   4   7 -10   55.79    1.91
  -4  -7   9    0.16    0.31
  -4  -7   9   -0.03    0.25
  -4   7   9    0.32    0.52
   4   7  -9   -0.05    0.30
  -4  -7   8  104.33    2.29
  -4  -7   8   97.43    2.88
  -4   7   8  137.64    2.26
  -4   7   8   96.97    3.02
   4   7  -8  107.57    2.57
  -4  -7   7    7.70    0.66
  -4  -7   7    6.31    0.76
  -4   7   7    8.51    0.65
  -4   7   7    5.17    0.84
   4   7  -7    7.10    0.76
  -4  -7   6   90.64    2.05
  -4  -7   6   74.82    2.27
  -4   7   6   96.74    2.02
  -4   7   6   77.79    2.46
   4   7  -6   83.06    2.23
  -4  -7   5    5.62    0.65
  -4   7   5    7.09    0.65
  -4   7   5    5.45    0.77
   4   7  -5    6.43    0.72
  -4  -7   4   11.17    0.80
  -4   7   4   12.41    0.84
  -4   7   4   10.22    0.93
   4   7  -4   12.32    0.92
  -4  -7   3   13.61    0.82
  -4   7   3   13.85    0.90
  -4   7   3   13.96    0.99
   4   7  -3   13.69    0.96
  -4   7   2   12.23    0.90
  -4   7   2   11.50    0.87
   4   7  -2   12.01    0.91
  -4   7   1   17.63    1.07
  -4   7   1   17.32    0.95
   4   7  -1   19.27    1.13
  -4   7   0   15.77    1.06
  -4   7   0   15.53    0.83
   4   7   0   15.12    1.02
  -4   7  -1    9.65    0.91
  -4   7  -1    8.56    0.60
   4   7   1    9.32    0.85
   4   7   1    8.56    0.79
  -4   7  -2   21.51    1.28
  -4   7  -2   21.27    0.81
   4   7   2   21.78    1.23
   4   7   2   21.52    1.23
  -4   7  -3    5.17    0.80
  -4   7  -3    5.12    0.42
   4   7   3    5.83    0.72
   4   7   3    6.43    0.79
  -4  -7  -4   69.86    2.22
  -4   7  -4   69.30    2.31
   4  -7   4   68.97    2.29
   4   7   4   74.99    2.31
   4   7   4   72.71    2.34
  -4  -7  -5    0.58    0.38
  -4  -7  -5    0.05    0.29
  -4   7  -5    0.01    0.40
   4  -7   5    0.08    0.37
   4   7   5    0.18    0.34
  -4  -7  -6   65.48    2.26
  -4  -7  -6   55.98    2.09
  -4   7  -6   60.12    2.31
   4  -7   6   51.27    2.15
   4   7   6   60.95    2.33
  -4  -7  -7    0.11    0.36
  -4  -7  -7   -0.02    0.31
  -4   7  -7    0.26    0.54
   4  -7   7    0.27    0.46
   4   7   7    0.31    0.45
  -4  -7  -8   58.99    2.24
  -4   7  -8   44.10    2.13
   4  -7   8   43.57    2.18
   4   7   8   53.33    2.36
  -4  -7  -9   -0.09    0.42
  -4   7  -9    0.72    0.64
   4  -7   9    0.26    0.48
   4   7   9    0.80    0.56
  -4  -7 -10   31.31    1.78
  -4   7 -10   27.05    1.86
   4  -7  10   24.19    1.81
   4   7  10   29.49    1.94
  -4  -7 -11    0.66    0.56
  -4   7 -11    0.58    0.65
   4  -7  11    0.46    0.63
   4   7  11    0.65    0.68
  -4   7 -12    9.28    1.34
   4  -7  12    9.64    1.42
   4   7  12   10.50    1.41
  -4   7 -13    2.38    0.92
   4  -7  13    1.64    0.89
   4   7  13    1.20    0.83
   4  -7  14   17.21    1.83
   4   7  14   15.07    1.68
   4  -7  15    0.12    0.80
   4   7  15    1.64    0.95
   4  -7  16    0.07    0.77
   4   7  16    1.14    0.93
   4  -7  17   -0.25    0.77
   4   7  17    0.48    0.89
   4  -7  18    0.74    1.02
   4   7  18    0.88    0.95
   4  -7  19    0.83    1.06
  -4  -8  20    0.03    0.79
  -4   8  20    0.90    1.10
  -4  -8  19    2.26    1.07
  -4   8  19    3.76    1.34
  -4  -8  18    1.11    0.87
  -4   8  18    1.32    1.07
  -4  -8  17    2.27    0.98
  -4   8  17    3.98    1.30
  -4  -8  16    0.29    0.61
  -4   8  16    0.29    0.79
  -4  -8  15    7.32    1.32
  -4   8  15    9.38    1.50
  -4  -8  14    0.37    0.55
  -4   8  14    0.49    0.83
  -4  -8  13    4.09    1.01
  -4   8  13    4.51    1.13
  -4  -8  12    4.04    0.94
  -4   8  12    4.38    1.04
  -4  -8  11    5.43    0.95
  -4   8  11    6.92    1.18
  -4  -8  10    1.52    0.57
  -4   8  10    1.58    0.74
   4   8 -10    2.47    0.59
  -4  -8   9    0.52    0.43
  -4   8   9    0.25    0.59
   4   8  -9    0.01    0.42
  -4  -8   8    0.36    0.31
  -4  -8   8    1.23    0.49
  -4   8   8    0.72    0.31
  -4   8   8    0.98    0.63
   4   8  -8    0.55    0.39
  -4  -8   7    8.04    0.67
  -4  -8   7    4.61    0.71
  -4   8   7    7.47    0.68
  -4   8   7    4.68    0.80
   4   8  -7    7.55    0.83
  -4  -8   6    1.00    0.34
  -4  -8   6    1.56    0.46
  -4   8   6    1.82    0.43
  -4   8   6    1.30    0.56
   4   8  -6    1.28    0.46
  -4  -8   5    4.99    0.64
  -4   8   5    5.22    0.63
  -4   8   5    4.61    0.75
   4   8  -5    3.67    0.63
  -4  -8   4    0.08    0.20
  -4   8   4    0.30    0.27
  -4   8   4    0.12    0.35
   4   8  -4   -0.19    0.23
  -4  -8   3    0.31    0.21
  -4   8   3    0.39    0.34
  -4   8   3   -0.09    0.31
   4   8  -3    0.46    0.34
  -4  -8   2    2.44    0.38
  -4   8   2    2.74    0.56
  -4   8   2    2.45    0.51
   4   8  -2    3.17    0.58
  -4  -8   1    0.33    0.18
  -4   8   1    0.42    0.36
  -4   8   1    0.56    0.34
   4   8  -1    0.41    0.34
  -4  -8   0   18.25    0.69
  -4   8   0   19.92    1.22
  -4   8   0   19.37    0.97
   4   8   0   19.24    1.19
  -4   8  -1    7.89    0.87
  -4   8  -1    7.65    0.61
   4   8   1    8.70    0.85
   4   8   1    7.61    0.80
  -4   8  -2    0.69    0.47
  -4   8  -2    1.11    0.29
   4   8   2    0.87    0.38
   4   8   2    1.24    0.46
  -4   8  -3   10.50    0.58
   4   8   3   12.01    1.00
   4   8   3    7.87    0.87
  -4   8  -4    8.12    0.98
   4  -8   4    9.25    0.99
   4   8   4    9.35    0.92
   4   8   4    7.32    0.85
  -4  -8  -5   24.58    1.45
  -4  -8  -5   23.31    1.42
  -4   8  -5   24.23    1.53
   4  -8   5   21.46    1.45
   4   8   5   23.91    1.49
  -4  -8  -6    9.36    1.00
  -4  -8  -6    8.68    0.96
  -4   8  -6    9.83    1.14
   4  -8   6    8.57    1.03
   4   8   6    9.41    1.04
  -4  -8  -7   24.70    1.51
  -4  -8  -7   22.40    1.44
  -4   8  -7   23.27    1.62
   4  -8   7   21.14    1.53
   4   8   7   24.38    1.63
  -4  -8  -8    4.20    0.79
  -4   8  -8    3.03    0.86
   4  -8   8    3.75    0.86
   4   8   8    3.51    0.82
  -4  -8  -9   26.01    1.63
  -4   8  -9   23.47    1.73
   4  -8   9   22.41    1.70
   4   8   9   24.25    1.76
  -4  -8 -10    1.56    0.71
  -4   8 -10    0.88    0.76
   4  -8  10    2.41    0.84
   4   8  10    1.11    0.67
  -4  -8 -11   39.68    2.09
  -4   8 -11   38.50    2.22
   4  -8  11   34.83    2.23
   4   8  11   38.40    2.32
  -4   8 -12    3.93    1.02
   4  -8  12    2.18    0.93
   4   8  12    2.17    0.92
  -4   8 -13   16.32    1.68
   4  -8  13   11.65    1.60
   4   8  13   16.06    1.74
   4  -8  14    0.60    0.81
   4   8  14    0.61    0.78
   4  -8  15   16.11    1.90
   4   8  15   20.72    2.06
   4  -8  16   -0.03    0.81
   4   8  16    0.44    0.85
   4  -8  17    6.45    1.54
   4   8  17    8.64    1.63
   4  -8  18   -1.20    0.74
   4   8  18    0.50    1.06
  -4  -9  19    0.08    0.75
  -4   9  19    0.03    0.97
  -4  -9  18    7.94    1.54
  -4   9  18   11.32    1.86
  -4  -9  17    0.08    0.63
  -4   9  17    0.33    0.90
  -4  -9  16    6.61    1.37
  -4   9  16    6.60    1.39
  -4  -9  15   -0.21    0.49
  -4   9  15   -0.30    0.73
  -4  -9  14   36.19    2.42
  -4   9  14   40.04    2.64
  -4  -9  13    0.71    0.64
  -4   9  13    0.71    0.76
  -4  -9  12   45.25    2.48
  -4   9  12   48.96    2.69
  -4  -9  11    1.87    0.73
  -4   9  11    2.01    0.85
  -4  -9  10   43.02    2.20
  -4   9  10   40.09    2.25
   4   9 -10   50.84    2.06
  -4  -9   9    0.18    0.36
  -4   9   9    0.64    0.64
   4   9  -9    0.85    0.48
  -4  -9   8   66.24    2.48
  -4   9   8   62.10    2.59
   4   9  -8   72.53    2.39
  -4  -9   7    1.21    0.37
  -4  -9   7    0.89    0.38
  -4   9   7    1.65    0.43
  -4   9   7    0.53    0.56
   4   9  -7    0.97    0.46
  -4  -9   6   75.90    1.92
  -4  -9   6   64.16    2.19
  -4   9   6   81.71    2.17
  -4   9   6   67.66    2.46
   4   9  -6   72.38    2.35
  -4  -9   5    0.25    0.23
  -4   9   5    0.27    0.29
  -4   9   5    0.73    0.47
   4   9  -5    0.15    0.33
  -4  -9   4   13.86    0.92
  -4   9   4   17.21    1.08
  -4   9   4   14.22    1.12
   4   9  -4   16.33    1.16
  -4  -9   3    0.34    0.23
  -4   9   3    0.12    0.30
  -4   9   3    0.21    0.36
   4   9  -3    0.20    0.31
  -4  -9   2    1.46    0.32
  -4   9   2    1.50    0.47
  -4   9   2    1.94    0.49
   4   9  -2    1.36    0.47
  -4  -9   1    0.51    0.22
  -4   9   1    0.38    0.38
  -4   9   1    0.28    0.33
   4   9  -1    0.46    0.35
  -4  -9   0    0.01    0.12
  -4   9   0   -0.34    0.27
  -4   9   0    0.01    0.27
   4   9   0   -0.08    0.24
  -4   9  -1    0.31    0.38
  -4   9  -1    0.35    0.28
   4   9   1    0.88    0.40
   4   9   1    0.23    0.31
  -4   9  -2    9.66    0.98
  -4   9  -2    9.34    0.65
   4   9   2    9.24    0.90
   4   9   2    9.63    0.93
  -4   9  -3    2.08    0.62
   4   9   3    2.97    0.63
   4   9   3    3.02    0.63
  -4   9  -4    8.34    1.02
   4  -9   4    8.74    1.01
   4   9   4    8.73    0.94
   4   9   4    8.35    0.92
  -4   9  -5    1.29    0.63
   4  -9   5    1.78    0.63
   4   9   5    1.06    0.48
   4   9   5    1.05    0.54
  -4  -9  -6   15.98    1.28
  -4  -9  -6   16.70    1.30
  -4   9  -6   18.27    1.48
   4  -9   6   13.26    1.29
   4   9   6   15.47    1.36
  -4  -9  -7    9.43    1.05
  -4  -9  -7    8.66    1.02
  -4   9  -7    9.86    1.24
   4  -9   7    9.03    1.16
   4   9   7    8.70    1.08
  -4   9  -8   10.50    1.31
   4  -9   8   10.96    1.27
   4   9   8   11.02    1.25
  -4  -9  -9    3.46    0.84
  -4   9  -9    3.19    0.93
   4  -9   9    2.63    0.87
   4   9   9    2.78    0.84
  -4  -9 -10    2.57    0.82
  -4   9 -10    2.65    0.88
   4  -9  10    2.74    0.91
   4   9  10    1.97    0.82
  -4  -9 -11    3.86    0.94
  -4   9 -11    4.69    1.07
   4  -9  11    3.23    1.02
   4   9  11    3.23    0.95
  -4   9 -12    3.74    1.06
   4  -9  12    2.15    0.95
   4   9  12    1.40    0.82
  -4   9 -13    5.52    1.21
   4  -9  13    5.92    1.29
   4   9  13    6.53    1.32
   4  -9  14    6.38    1.34
   4  -9  15    0.28    0.78
   4   9  15    0.62    0.88
   4  -9  16   -0.14    0.80
   4   9  16    0.46    0.90
   4  -9  17    0.01    0.91
   4   9  17    0.52    0.92
   4  -9  18    1.07    1.09
   4   9  18    1.03    1.04
  -4 -10  19    1.20    0.97
  -4  10  19    2.05    1.29
  -4 -10  18    0.09    0.66
  -4  10  18    0.32    0.95
  -4 -10  17    3.79    1.18
  -4  10  17    4.88    1.41
  -4 -10  16    0.74    0.71
  -4  10  16   -0.07    0.81
  -4 -10  15    5.66    1.26
  -4  10  15    6.01    1.38
  -4 -10  14    0.33    0.60
  -4  10  14    1.10    0.84
  -4 -10  13    3.99    1.03
  -4  10  13    4.26    1.15
  -4 -10  12   11.53    1.35
  -4  10  12   13.06    1.54
  -4 -10  11    6.50    1.07
  -4  10  11    6.29    1.17
  -4 -10  10    1.56    0.61
  -4  10  10    1.11    0.75
   4  10 -10    1.76    0.60
  -4 -10   9    1.83    0.64
  -4  10   9    1.38    0.72
   4  10  -9    1.67    0.60
  -4 -10   8    8.17    0.96
  -4  10   8    9.62    1.24
   4  10  -8    9.26    1.02
  -4 -10   7    5.56    0.79
  -4  10   7    6.12    0.73
  -4  10   7    3.66    0.86
   4  10  -7    6.08    0.87
  -4 -10   6   25.62    1.43
  -4  10   6   28.90    1.42
  -4  10   6   24.89    1.59
   4  10  -6   27.78    1.58
  -4 -10   5   -0.13    0.20
  -4  10   5    0.00    0.28
  -4  10   5   -0.29    0.42
   4  10  -5    0.08    0.35
  -4 -10   4   16.50    1.03
  -4  10   4   19.82    1.23
  -4  10   4   15.37    1.21
   4  10  -4   20.10    1.35
  -4  10   3    2.47    0.56
  -4  10   3    2.82    0.61
   4  10  -3    3.10    0.65
  -4 -10   2   20.59    0.98
  -4  10   2   22.88    1.35
  -4  10   2   21.37    1.23
   4  10  -2   22.09    1.39
  -4 -10   1    0.08    0.19
  -4  10   1    0.13    0.35
  -4  10   1    0.23    0.32
   4  10  -1   -0.01    0.28
  -4 -10   0   36.96    1.00
  -4  10   0   42.07    1.85
  -4  10   0   36.13    1.37
   4  10   0   40.98    1.87
  -4  10  -1    3.32    0.70
  -4  10  -1    3.62    0.52
   4  10   1    4.35    0.73
   4  10   1    3.59    0.64
  -4  10  -2   11.84    1.13
  -4  10  -2   12.05    0.75
   4  10   2   12.01    1.07
   4  10   2   14.22    1.14
   4  10   3    2.36    0.61
  -4  10  -4   10.85    1.16
   4 -10   4   10.05    1.09
   4  10   4   11.84    1.10
   4  10   4   10.91    1.07
  -4  10  -5   13.84    1.31
   4 -10   5   11.25    1.21
   4  10   5   13.88    1.21
   4  10   5   13.45    1.22
  -4  10  -6    9.96    1.25
   4 -10   6    7.57    1.07
   4  10   6    9.69    1.09
   4  10   6    7.68    1.06
  -4 -10  -7   12.08    1.22
  -4 -10  -7    9.83    1.11
  -4  10  -7   10.99    1.28
   4 -10   7   10.28    1.26
   4  10   7   11.50    1.29
  -4 -10  -8    0.74    0.56
  -4 -10  -8    0.31    0.42
  -4  10  -8    0.44    0.61
   4 -10   8    0.90    0.63
   4  10   8    0.54    0.55
  -4 -10  -9   18.25    1.51
  -4 -10  -9   18.26    1.48
  -4  10  -9   17.96    1.62
   4 -10   9   13.59    1.49
   4  10   9   18.27    1.66
  -4 -10 -10    0.39    0.58
  -4  10 -10    0.20    0.62
   4 -10  10    0.03    0.62
   4  10  10   -0.01    0.51
  -4 -10 -11   18.77    1.61
  -4  10 -11   14.92    1.59
   4 -10  11   12.28    1.51
   4  10  11   15.62    1.66
  -4  10 -12    0.95    0.77
   4 -10  12    1.07    0.83
   4  10  12    1.61    0.86
  -4  10 -13   15.10    1.70
   4 -10  13   12.62    1.70
   4  10  13   14.38    1.74
   4 -10  14    0.14    0.74
   4  10  14    0.40    0.71
   4 -10  15    2.84    1.18
   4  10  15    3.91    1.22
   4 -10  16   -0.41    0.79
   4  10  16    0.69    0.89
   4 -10  17    3.34    1.30
   4  10  17    2.92    1.25
   4 -10  18    0.48    1.04
   4  10  18    0.94    1.06
  -4 -11  19   -0.52    0.69
  -4 -11  18    2.44    1.11
  -4  11  18    1.72    1.16
  -4 -11  17    0.14    0.68
  -4  11  17    0.10    0.88
  -4 -11  16    8.30    1.50
  -4  11  16    5.60    1.40
  -4 -11  15    0.28    0.59
  -4  11  15    0.30    0.74
  -4 -11  14    8.92    1.42
  -4  11  14    9.69    1.53
  -4 -11  13    0.07    0.50
  -4  11  13    0.34    0.71
  -4 -11  12   18.24    1.70
  -4  11  12   21.87    2.01
  -4 -11  11    0.95    0.60
  -4  11  11    0.75    0.81
  -4 -11  10   19.09    1.58
  -4  11  10   18.47    1.71
   4  11 -10   23.44    1.61
  -4 -11   9    0.19    0.35
  -4  11   9   -0.27    0.60
   4  11  -9    0.28    0.48
  -4 -11   8   20.10    1.46
  -4  11   8   19.89    1.63
   4  11  -8   21.49    1.51
  -4 -11   7    2.35    0.60
  -4  11   7    1.88    0.52
  -4  11   7    1.54    0.70
   4  11  -7    2.27    0.65
  -4 -11   6   33.93    1.68
  -4  11   6   39.90    1.75
  -4  11   6   31.59    1.86
   4  11  -6   38.47    1.92
  -4 -11   5    0.93    0.41
  -4  11   5    0.46    0.37
  -4  11   5    0.62    0.55
   4  11  -5    0.82    0.49
  -4 -11   4   14.80    1.01
  -4  11   4   18.55    1.27
  -4  11   4   14.32    1.22
   4  11  -4   15.75    1.26
  -4  11   3    3.30    0.64
   4  11  -3    2.69    0.65
  -4 -11   2    0.58    0.28
  -4  11   2    0.93    0.45
  -4  11   2    0.40    0.43
   4  11  -2    0.66    0.45
  -4  11   1    1.86    0.58
  -4  11   1    2.39    0.55
   4  11  -1    2.49    0.62
  -4  11   0    3.95    0.74
  -4  11   0    2.86    0.57
   4  11   0    3.86    0.73
  -4  11  -1   10.17    1.07
  -4  11  -1   10.21    0.82
   4  11   1   12.87    1.13
   4  11   1   11.53    1.03
  -4  11  -2    0.79    0.51
   4  11   2    0.47    0.40
   4  11   2    0.55    0.43
   4  11   3   15.93    1.30
   4  11   3   11.53    1.13
  -4  11  -4    0.26    0.48
   4  11   4    0.94    0.51
   4  11   4    0.67    0.49
  -4  11  -5    9.47    1.24
   4 -11   5    9.35    1.16
   4  11   5   10.56    1.15
   4  11   5    9.02    1.07
  -4  11  -6   17.54    1.53
   4 -11   6   14.68    1.40
   4  11   6   18.80    1.47
   4  11   6   16.65    1.44
  -4 -11  -7   11.58    1.26
  -4 -11  -7   11.08    1.20
  -4  11  -7    9.84    1.30
   4 -11   7   10.58    1.27
   4  11   7   12.38    1.36
  -4  11  -8    4.68    1.02
   4 -11   8    2.49    0.86
   4  11   8    3.25    0.90
  -4 -11  -9    3.38    0.89
  -4 -11  -9    3.32    0.82
  -4  11  -9    3.46    0.98
   4 -11   9    2.71    0.92
   4  11   9    2.09    0.86
  -4 -11 -10    3.22    0.95
  -4  11 -10    4.08    1.03
   4 -11  10    2.15    0.90
   4  11  10    3.40    0.98
  -4 -11 -11    0.51    0.63
  -4  11 -11    0.48    0.66
   4 -11  11    0.27    0.68
   4  11  11    0.84    0.76
  -4  11 -12    5.70    1.23
   4 -11  12    5.99    1.30
   4  11  12    5.88    1.28
  -4  11 -13    1.63    0.91
   4 -11  13    0.11    0.70
   4  11  13    1.32    0.85
   4 -11  14    5.83    1.35
   4  11  14    6.06    1.38
   4 -11  15   -0.09    0.79
   4  11  15    0.77    0.87
   4 -11  16    0.61    0.92
   4  11  16   -0.15    0.71
   4 -11  17   -0.52    0.86
   4  11  17    0.95    1.08
  -4 -12  18    1.88    1.10
  -4  12  18    0.76    1.05
  -4 -12  17    0.78    0.84
  -4  12  17    0.90    1.07
  -4 -12  16    0.06    0.69
  -4  12  16    0.19    0.83
  -4 -12  15    1.84    0.88
  -4  12  15    1.36    0.99
  -4 -12  14    0.30    0.63
  -4  12  14    0.14    0.74
  -4 -12  13    1.55    0.76
  -4  12  13    1.10    0.88
  -4 -12  12    2.56    1.10
  -4  12  12    3.83    1.14
  -4 -12  11    2.72    0.85
  -4  12  11    2.01    0.95
  -4 -12  10    1.29    0.66
  -4  12  10    1.91    0.86
   4  12 -10    2.05    0.70
  -4 -12   9   -0.24    0.35
  -4  12   9   -0.12    0.63
   4  12  -9    0.10    0.48
  -4 -12   8   18.24    1.43
  -4  12   8   19.79    1.72
   4  12  -8   21.92    1.59
  -4 -12   7    1.25    0.52
  -4  12   7    0.97    0.46
  -4  12   7    1.17    0.69
   4  12  -7    1.17    0.58
  -4 -12   6   28.27    1.58
  -4  12   6   28.46    1.58
  -4  12   6   26.03    1.77
   4  12  -6   29.86    1.78
  -4 -12   5    0.87    0.42
  -4  12   5    0.72    0.45
  -4  12   5    0.73    0.59
   4  12  -5    1.23    0.56
  -4 -12   4   91.73    2.47
  -4  12   4   97.66    2.88
  -4  12   4   86.31    2.76
   4  12  -4   98.04    3.12
  -4 -12   3    0.38    0.29
  -4  12   3    0.63    0.40
  -4  12   3    0.25    0.45
   4  12  -3    0.26    0.41
  -4  12   2   56.86    2.27
  -4  12   2   49.92    1.96
   4  12  -2   55.44    2.35
  -4  12   1   -0.04    0.35
  -4  12   1    0.46    0.44
   4  12  -1    0.32    0.39
  -4  12   0  121.15    3.39
  -4  12   0  106.61    2.49
   4  12   0  122.75    3.46
  -4  12  -1    0.21    0.45
   4  12   1    0.13    0.40
   4  12   1    0.31    0.38
  -4  12  -2   60.03    2.50
   4  12   2   64.21    2.56
   4  12   2   57.45    2.30
  -4  12  -4   56.36    2.53
   4  12   4   57.08    2.46
   4  12   4   55.56    2.42
  -4  12  -5    7.15    1.14
   4 -12   5    4.67    0.94
   4  12   5    6.83    1.04
   4  12   5    6.34    0.99
  -4  12  -6   28.49    1.94
   4 -12   6   26.58    1.85
   4  12   6   28.42    1.84
   4  12   6   29.37    1.90
  -4  12  -7   17.01    1.61
   4 -12   7   15.31    1.55
   4  12   7   16.85    1.49
   4  12   7   17.45    1.60
  -4 -12  -8   22.45    1.72
  -4 -12  -8   22.75    1.70
  -4  12  -8   17.11    1.64
   4 -12   8   14.89    1.56
   4  12   8   13.82    1.46
  -4 -12  -9   10.43    1.29
  -4 -12  -9   12.55    1.36
  -4  12  -9   11.98    1.46
   4 -12   9   11.26    1.47
   4  12   9    9.32    1.36
  -4 -12 -10    2.54    0.92
  -4 -12 -10    4.47    0.97
  -4  12 -10    3.54    1.02
   4 -12  10    2.41    0.95
   4  12  10    2.91    0.96
  -4  12 -11    8.77    1.42
   4 -12  11    7.45    1.36
   4  12  11   10.54    1.54
  -4  12 -12    2.61    0.96
   4 -12  12    1.83    0.92
   4  12  12    2.25    0.97
  -4  12 -13   12.66    1.70
   4 -12  13   11.77    1.74
   4  12  13   10.58    1.62
  -4  12 -14    0.38    0.81
   4 -12  14   -0.30    0.65
   4  12  14    0.67    0.80
   4 -12  15    1.03    0.96
   4  12  15    2.15    1.13
   4 -12  16   -0.53    0.76
   4  12  16    0.41    0.94
   4 -12  17    2.10    1.28
   4  12  17    1.41    1.16
  -4 -13  18    0.84    0.91
  -4  13  18    1.24    1.10
  -4 -13  17   -0.08    0.69
  -4  13  17    0.05    0.89
  -4 -13  16    3.28    1.18
  -4  13  16    2.99    1.28
  -4 -13  15   -0.77    0.50
  -4  13  15    0.69    0.88
  -4 -13  14    3.30    1.09
  -4  13  14    4.23    1.23
  -4 -13  13    0.66    0.66
  -4  13  13    0.41    0.85
  -4 -13  12    7.05    1.25
  -4  13  12    6.84    1.40
  -4 -13  11    2.44    0.84
  -4  13  11    2.12    0.95
   4  13 -11    2.83    0.86
  -4 -13  10    8.02    1.20
  -4  13  10    7.34    1.30
   4  13 -10    6.84    1.13
  -4 -13   9    4.89    0.95
  -4  13   9    4.61    1.09
   4  13  -9    5.80    1.04
  -4 -13   8    7.74    1.07
  -4  13   8    6.62    1.20
   4  13  -8    8.32    1.16
  -4 -13   7    4.07    0.78
  -4  13   7    3.54    0.73
  -4  13   7    3.67    0.94
   4  13  -7    3.35    0.83
  -4 -13   6   10.44    1.03
  -4  13   6   12.36    1.17
  -4  13   6    9.61    1.25
   4  13  -6   11.32    1.25
  -4 -13   5    0.52    0.39
  -4  13   5    0.55    0.49
  -4  13   5    0.67    0.62
   4  13  -5    0.61    0.53
  -4 -13   4   15.21    1.09
  -4  13   4   18.35    1.41
  -4  13   4   16.84    1.39
   4  13  -4   16.90    1.44
  -4  13   3    0.85    0.50
  -4  13   3    0.47    0.53
  -4  13   2    0.54    0.52
  -4  13   2    0.03    0.46
   4  13  -2    0.45    0.49
  -4  13   1    5.73    0.95
  -4  13   1    6.11    0.84
   4  13  -1    6.23    0.98
  -4  13   0    1.25    0.62
   4  13   0    1.57    0.61
  -4  13  -1   22.98    1.66
   4  13   1   20.86    1.56
   4  13   1   20.80    1.43
  -4  13  -2    1.09    0.60
   4  13   2    1.36    0.62
   4  13   2    1.71    0.61
  -4  13  -3   48.86    2.40
   4  13   3   40.20    2.14
   4  13   3   39.57    2.06
  -4  13  -4    5.57    1.03
   4  13   4    6.48    1.03
   4  13   4    6.09    1.00
  -4  13  -5   35.63    2.17
   4 -13   5   30.51    1.95
   4  13   5   38.15    2.14
   4  13   5   31.58    1.96
  -4  13  -6    7.17    1.21
   4 -13   6    5.16    1.05
   4  13   6    6.60    1.10
   4  13   6    6.33    1.10
  -4  13  -7   19.53    1.74
   4 -13   7   16.86    1.65
   4  13   7   21.28    1.70
   4  13   7   18.90    1.66
  -4 -13  -8    5.48    1.11
  -4 -13  -8    4.66    0.97
  -4  13  -8    3.54    1.00
   4 -13   8    3.58    0.99
   4  13   8    3.14    0.97
  -4 -13  -9   12.38    1.44
  -4 -13  -9   12.45    1.41
  -4  13  -9   12.86    1.54
   4 -13   9   10.34    1.47
   4  13   9   12.52    1.48
  -4 -13 -10    1.07    0.77
  -4 -13 -10    1.78    0.79
  -4  13 -10    1.44    0.84
   4 -13  10    0.78    0.72
   4  13  10    0.62    0.70
  -4  13 -11    7.05    1.33
   4 -13  11    6.22    1.27
   4  13  11    7.58    1.37
  -4  13 -12    1.54    0.91
   4 -13  12    0.78    0.82
   4  13  12    1.19    0.87
  -4  13 -13    0.62    0.82
   4 -13  13    0.72    0.82
   4  13  13    0.62    0.86
  -4  13 -14    1.51    0.89
   4 -13  14    0.67    0.84
   4  13  14    0.39    0.84
   4 -13  15   -0.98    0.67
   4  13  15    0.81    0.96
   4 -13  16    0.04    0.87
   4  13  16   -0.07    0.88
  -4 -14  17   -0.20    0.72
  -4  14  17   -0.19    0.90
  -4 -14  16    0.34    0.77
  -4  14  16   -0.57    0.81
  -4 -14  15    0.00    0.65
  -4  14  15    1.16    1.03
  -4 -14  14    0.50    0.72
  -4  14  14    1.58    0.98
  -4 -14  13   -0.20    0.53
  -4  14  13   -0.04    0.64
  -4 -14  12    6.98    1.25
  -4  14  12    7.66    1.47
  -4 -14  11   -0.06    0.54
  -4  14  11    0.06    0.72
   4  14 -11    0.71    0.63
  -4 -14  10   22.92    1.84
  -4  14  10   24.75    2.03
   4  14 -10   25.92    1.90
  -4 -14   9    0.00    0.47
  -4  14   9    0.14    0.63
   4  14  -9    0.28    0.55
  -4 -14   8   52.37    2.43
  -4  14   8   54.05    2.74
   4  14  -8   60.89    2.76
  -4 -14   7    1.12    0.54
  -4  14   7    1.54    0.62
  -4  14   7    1.91    0.85
   4  14  -7    1.36    0.66
  -4 -14   6   81.91    2.75
  -4  14   6   99.15    3.15
  -4  14   6   86.52    3.18
   4  14  -6  100.01    3.45
  -4 -14   5    0.99    0.49
  -4  14   5    0.85    0.59
  -4  14   5   -0.07    0.58
   4  14  -5    0.91    0.62
  -4  14   4  211.02    4.63
  -4  14   4  185.10    4.23
   4  14  -4  200.16    4.80
   4  14  -3    4.61    0.93
  -4  14   2  154.71    4.04
  -4  14   2  133.46    3.32
   4  14  -2  153.42    4.19
  -4  14   1    5.84    1.02
   4  14  -1    4.77    0.95
  -4  14   0  264.11    5.39
   4  14   0  263.16    5.47
  -4  14  -1   13.84    1.41
   4  14   1   12.00    1.31
   4  14   1   12.75    1.22
  -4  14  -2  111.24    3.63
   4  14   2  113.53    3.64
   4  14   2  106.75    3.30
  -4  14  -3    1.22    0.66
   4  14   3    0.55    0.54
   4  14   3    1.29    0.64
  -4  14  -4   96.42    3.49
   4  14   4   94.05    3.36
   4  14   4   90.20    3.23
  -4  14  -5   16.48    1.59
   4  14   5   19.26    1.63
   4  14   5   20.04    1.68
  -4  14  -6   31.96    2.16
   4 -14   6   28.27    2.02
   4  14   6   33.67    2.13
   4  14   6   30.81    2.09
  -4  14  -7    4.66    1.07
   4 -14   7    2.39    0.92
   4  14   7    3.48    0.95
   4  14   7    5.04    1.10
  -4  14  -8   19.33    1.82
   4 -14   8   16.52    1.72
   4  14   8   19.55    1.75
   4  14   8   20.87    1.87
  -4 -14  -9    3.33    1.02
  -4 -14  -9    2.50    0.90
  -4  14  -9    2.94    0.97
   4 -14   9    1.44    0.88
   4  14   9    3.07    1.01
  -4 -14 -10    2.10    0.92
  -4 -14 -10    2.46    0.89
  -4  14 -10    1.29    0.85
   4 -14  10    0.76    0.74
   4  14  10    2.39    0.99
  -4  14 -11    4.16    1.15
   4 -14  11    2.88    1.08
   4  14  11    3.98    1.22
  -4  14 -12    2.44    1.02
   4 -14  12    1.14    0.86
   4  14  12    1.82    0.97
  -4  14 -13    2.89    1.07
   4 -14  13    1.53    0.97
   4  14  13    0.33    0.79
  -4  14 -14    0.79    0.82
   4 -14  14   -0.47    0.68
   4  14  14    0.66    0.87
   4 -14  15    0.34    0.92
   4  14  15    0.71    0.93
   4 -14  16   -0.91    0.74
   4  14  16    0.15    0.83
  -4 -15  16   -0.78    0.66
  -4  15  16   -0.05    0.84
  -4 -15  15    0.22    0.75
  -4  15  15    0.04    0.88
  -4 -15  14   -0.22    0.65
  -4  15  14   -0.48    0.74
  -4 -15  13   -0.13    0.58
  -4  15  13    0.21    0.84
  -4 -15  12    0.17    0.59
  -4  15  12    0.17    0.80
  -4 -15  11    0.25    0.61
  -4  15  11    1.28    0.93
   4  15 -11    1.12    0.73
  -4 -15  10   -0.16    0.48
  -4  15  10   -0.32    0.62
   4  15 -10    0.59    0.65
  -4 -15   9    0.97    0.62
  -4  15   9    1.21    0.89
   4  15  -9    0.89    0.69
  -4 -15   8    0.53    0.50
  -4  15   8    0.08    0.69
   4  15  -8    0.28    0.56
  -4 -15   7    3.10    0.74
  -4  15   7    2.47    0.76
  -4  15   7    2.05    0.85
   4  15  -7    4.07    0.96
  -4  15   6   -0.03    0.44
  -4  15   6   -0.28    0.60
   4  15  -6   -0.03    0.45
  -4  15   5    2.68    0.79
  -4  15   5    1.47    0.75
   4  15  -5    3.29    0.91
  -4  15   4    1.36    0.67
  -4  15   4    1.59    0.71
   4  15  -4    1.32    0.68
  -4  15   2    2.69    0.82
   4  15  -2    1.82    0.73
  -4  15   1   14.38    1.44
   4  15  -1   14.27    1.44
  -4  15   0   -0.03    0.50
   4  15   0    0.20    0.47
  -4  15  -1   21.97    1.77
   4  15   1   22.05    1.74
   4  15   1   20.08    1.50
  -4  15  -2    1.25    0.70
   4  15   2    0.92    0.58
   4  15   2    0.64    0.56
  -4  15  -3   25.00    1.92
   4  15   3   16.71    1.55
  -4  15  -4    1.67    0.75
   4  15   4    2.03    0.76
   4  15   4    0.73    0.62
  -4  15  -5   12.41    1.48
   4  15   5   10.99    1.36
   4  15   5    8.90    1.25
  -4  15  -6    1.74    0.80
   4  15   6    0.72    0.67
   4  15   6    0.67    0.65
  -4  15  -7    6.95    1.29
   4 -15   7    6.10    1.20
   4  15   7    6.24    1.16
   4  15   7    5.16    1.13
  -4  15  -8    0.00    0.59
   4 -15   8    0.04    0.63
   4  15   8   -0.14    0.56
   4  15   8   -0.24    0.56
  -4 -15  -9    0.55    0.74
  -4 -15  -9    0.77    0.70
  -4  15  -9    1.10    0.80
   4 -15   9    0.73    0.80
   4  15   9    1.25    0.82
  -4 -15 -10    0.04    0.75
  -4 -15 -10   -0.20    0.58
  -4  15 -10   -0.07    0.64
   4 -15  10    0.59    0.76
   4  15  10   -0.34    0.60
  -4  15 -11    1.65    0.91
   4 -15  11    0.81    0.89
   4  15  11    1.88    0.96
  -4  15 -12    0.52    0.78
   4 -15  12    0.33    0.76
   4  15  12    0.56    0.74
  -4  15 -13    1.13    0.87
   4 -15  13   -0.42    0.68
   4  15  13    0.08    0.73
  -4  15 -14    0.69    0.84
   4 -15  14   -0.27    0.75
   4  15  14   -0.16    0.78
   4 -15  15    0.73    0.99
   4  15  15    1.60    1.07
  -4 -16  16    0.04    0.79
  -4  16  16   -0.70    0.89
  -4 -16  15   -0.18    0.70
  -4  16  15    0.64    1.02
  -4 -16  14   -0.31    0.63
  -4  16  14   -0.03    0.83
  -4 -16  13   -0.30    0.58
  -4  16  13   -0.34    0.78
  -4 -16  12    2.82    1.03
  -4  16  12    1.57    1.03
  -4 -16  11    0.25    0.63
  -4  16  11    0.97    0.86
   4  16 -11    0.26    0.63
  -4 -16  10   10.37    1.42
  -4  16  10   10.69    1.54
   4  16 -10   14.46    1.61
  -4 -16   9   -0.11    0.49
  -4  16   9    0.73    0.77
   4  16  -9    0.83    0.69
  -4  16   8   27.14    2.13
   4  16  -8   27.40    2.07
  -4  16   7    0.36    0.50
  -4  16   7    1.41    0.82
   4  16  -7    0.63    0.63
  -4  16   6   45.74    2.37
  -4  16   6   41.09    2.38
   4  16  -6   45.22    2.55
  -4  16   5    2.11    0.75
  -4  16   5    1.17    0.75
   4  16  -5    1.46    0.76
  -4  16   4   80.21    3.14
  -4  16   4   68.24    2.79
   4  16  -4   70.41    3.12
  -4  16   3    1.02    0.63
   4  16  -3    1.80    0.75
  -4  16   2   56.84    2.71
   4  16  -2   57.97    2.82
  -4  16   1    2.89    0.86
   4  16  -1    1.96    0.77
  -4  16   0   64.12    2.92
   4  16   0   65.18    2.97
  -4  16  -1    0.57    0.61
   4  16   1    0.47    0.53
   4  16   1    0.57    0.54
  -4  16  -2   18.27    1.72
   4  16   2   20.20    1.73
   4  16   2   18.41    1.53
  -4  16  -3    1.35    0.74
   4  16   3    0.90    0.63
   4  16   3    0.72    0.59
  -4  16  -4   13.41    1.54
   4  16   4   12.72    1.44
   4  16   4   11.67    1.36
  -4  16  -5    0.09    0.61
   4  16   5   -0.03    0.52
   4  16   5   -0.01    0.53
  -4  16  -6    1.75    0.86
   4  16   6    1.38    0.76
   4  16   6    1.29    0.76
  -4  16  -7    0.27    0.69
   4 -16   7    0.01    0.63
   4  16   7    0.39    0.62
   4  16   7   -0.10    0.51
  -4  16  -8    0.25    0.70
   4 -16   8    0.02    0.68
   4  16   8    0.53    0.61
   4  16   8    0.06    0.66
  -4 -16  -9   -0.29    0.66
  -4 -16  -9   -0.13    0.57
  -4  16  -9    0.54    0.75
   4 -16   9   -0.04    0.74
   4  16   9    0.35    0.64
  -4 -16 -10    0.52    0.77
  -4 -16 -10   -0.33    0.59
  -4  16 -10    0.16    0.64
   4 -16  10   -0.14    0.68
   4  16  10   -0.30    0.66
  -4  16 -11    0.44    0.81
   4 -16  11    0.72    0.82
   4  16  11    0.47    0.76
  -4  16 -12    0.94    0.87
   4 -16  12    0.90    0.94
   4  16  12    0.25    0.78
  -4  16 -13   -0.08    0.78
   4 -16  13    0.34    0.86
   4  16  13    0.13    0.81
  -4  16 -14    0.45    0.87
   4 -16  14    0.23    0.85
   4  16  14    0.31    0.79
  -4 -17  15   -0.52    0.70
  -4  17  15   -0.22    0.93
  -4 -17  14    2.16    1.05
  -4  17  14    4.66    1.46
  -4 -17  13   -0.22    0.66
  -4  17  13    0.31    0.83
  -4 -17  12    3.20    1.08
  -4  17  12    2.22    1.13
  -4 -17  11    0.15    0.61
  -4  17  11    0.16    0.80
   4  17 -11    0.16    0.71
  -4  17  10    1.73    0.93
   4  17 -10    2.43    0.94
  -4  17   9    0.18    0.71
   4  17  -9    0.64    0.73
  -4  17   8    2.38    1.00
   4  17  -8    1.95    0.86
  -4  17   7    1.60    0.85
   4  17  -7    1.51    0.82
  -4  17   6    0.02    0.52
  -4  17   6   -0.09    0.63
   4  17  -6    0.05    0.56
  -4  17   5    0.84    0.63
  -4  17   5   -0.11    0.62
   4  17  -5    0.66    0.68
  -4  17   4    2.43    0.83
   4  17  -4    0.98    0.68
  -4  17   2    2.44    0.83
   4  17  -2    0.99    0.70
  -4  17   1    7.36    1.26
   4  17  -1    5.98    1.14
  -4  17   0   -0.21    0.49
   4  17   0    0.40    0.58
  -4  17  -1   13.12    1.54
   4  17   1   13.50    1.51
   4  17   1   12.71    1.31
  -4  17  -2   12.13    1.48
   4  17   2   11.40    1.50
   4  17   2   10.89    1.28
  -4  17  -3   20.37    1.87
   4  17   3   19.37    1.77
   4  17   3   15.69    1.55
  -4  17  -4    5.66    1.21
   4  17   4    5.84    1.16
   4  17   4    5.34    1.11
  -4  17  -5   13.11    1.61
   4  17   5   11.83    1.55
   4  17   5   10.48    1.42
  -4  17  -6    2.68    0.99
   4  17   6    1.26    0.77
   4  17   6    0.65    0.66
  -4  17  -7    8.06    1.48
   4  17   7    7.60    1.35
   4  17   7    8.11    1.35
  -4  17  -8    5.37    1.29
   4 -17   8    4.83    1.21
   4  17   8    6.33    1.27
   4  17   8    5.87    1.30
  -4 -17  -9    3.49    1.09
  -4  17  -9    5.29    1.33
   4 -17   9    3.63    1.18
   4  17   9    5.65    1.28
  -4  17 -10    1.71    0.97
   4 -17  10    0.75    0.87
   4  17  10    1.09    0.84
  -4  17 -11    1.50    0.97
   4 -17  11    0.69    0.87
   4  17  11    1.99    1.06
  -4  17 -12    0.21    0.83
   4 -17  12    0.26    0.86
   4  17  12    1.03    0.97
  -4  17 -13    0.37    0.91
   4 -17  13    0.08    0.87
   4  17  13    0.77    0.90
  -4 -18  14   -0.76    0.69
  -4  18  14   -0.06    0.92
  -4 -18  13   -0.06    0.75
  -4  18  13    0.01    0.92
  -4  18  12    2.70    1.18
  -4  18  11    0.64    0.85
   4  18 -11    1.03    0.80
  -4  18  10    3.32    1.17
   4  18 -10    4.13    1.14
  -4  18   9    0.45    0.84
   4  18  -9    0.31    0.73
  -4  18   8   20.62    1.98
   4  18  -8   17.86    1.85
  -4  18   7    1.66    0.88
   4  18  -7    2.41    0.94
  -4  18   6   20.61    1.80
  -4  18   6   17.30    1.75
   4  18  -6   18.36    1.84
  -4  18   5    0.79    0.67
   4  18  -5    0.05    0.63
  -4  18   4   38.17    2.38
   4  18  -4   35.66    2.44
  -4  18   3    1.23    0.75
   4  18  -3    2.80    0.92
  -4  18   2   40.42    2.50
   4  18  -2   42.66    2.63
  -4  18   1    3.94    1.02
   4  18  -1    2.96    0.94
  -4  18   0   35.91    2.40
   4  18   0   35.27    2.39
  -4  18  -1    1.71    0.82
   4  18   1    1.85    0.79
  -4  18  -2   26.98    2.17
   4  18   2   24.57    2.02
   4  18   2   25.83    1.89
  -4  18  -3    1.61    0.85
   4  18   3    0.26    0.57
   4  18   3    0.20    0.53
  -4  18  -4   21.40    1.99
   4  18   4   21.34    1.93
   4  18   4   19.91    1.78
  -4  18  -5    1.62    0.88
   4  18   5    0.39    0.69
   4  18   5    1.59    0.80
  -4  18  -6   12.07    1.73
   4  18   6   10.07    1.52
   4  18   6   11.22    1.55
  -4  18  -7    1.36    0.96
   4  18   7    0.44    0.72
   4  18   7    0.71    0.75
  -4  18  -8   10.37    1.69
   4  18   8   10.67    1.60
   4  18   8    8.78    1.51
  -4  18  -9    1.01    0.90
   4 -18   9    1.20    0.93
   4  18   9    0.61    0.83
   4  18   9    0.88    0.78
  -4  18 -10    2.38    1.09
   4 -18  10    0.81    0.97
   4  18  10    1.54    0.89
  -4  18 -11    3.23    1.21
   4 -18  11    3.20    1.27
   4  18  11    3.60    1.24
  -4  18 -12    1.90    1.10
   4 -18  12    1.03    1.00
   4  18  12    0.80    0.93
   4 -18  13    2.20    1.22
  -4  19  13    0.47    0.96
  -4  19  12    6.63    1.59
  -4  19  11    1.57    1.08
   4  19 -11    1.35    0.92
  -4  19  10   12.91    1.83
   4  19 -10   15.04    1.84
  -4  19   9   -0.38    0.71
   4  19  -9   -0.18    0.66
  -4  19   8    9.88    1.58
   4  19  -8   11.63    1.71
  -4  19   7    1.53    0.89
   4  19  -7    1.00    0.82
  -4  19   6   12.02    1.58
   4  19  -6   12.33    1.72
  -4  19   5   -0.06    0.56
   4  19  -5   -0.03    0.67
  -4  19   4    5.30    1.13
   4  19  -4    4.66    1.17
  -4  19   3    0.97    0.69
   4  19  -3    1.30    0.81
  -4  19   2    4.28    1.09
   4  19  -2    4.61    1.15
  -4  19   1    2.20    0.90
   4  19  -1    2.38    0.92
  -4  19   0    0.33    0.59
   4  19   0    0.25    0.59
  -4  19  -1    3.26    1.02
   4  19   1    2.28    0.90
  -4  19  -2    1.02    0.81
   4  19   2    0.72    0.72
  -4  19  -3    5.61    1.25
   4  19   3    6.73    1.30
  -4  19  -4    1.66    0.92
   4  19   4    2.72    0.95
   4  19   4    2.48    0.94
  -4  19  -5    5.18    1.29
   4  19   5    4.13    1.14
   4  19   5    4.54    1.13
  -4  19  -6    4.28    1.25
   4  19   6    2.99    1.07
   4  19   6    1.68    0.92
  -4  19  -7    1.03    0.89
   4  19   7    0.63    0.78
   4  19   7    0.93    0.80
  -4  19  -8    5.40    1.37
   4  19   8    3.50    1.15
   4  19   8    5.30    1.33
  -4  19  -9    1.46    1.02
   4  19   9    1.89    1.01
   4  19   9    1.33    0.92
  -4  19 -10    6.10    1.48
   4  19  10    6.01    1.47
   4 -19  11   -0.14    0.85
   4  19  11    0.63    0.93
   4 -19  12    1.29    1.11
  -4  20  12   -0.32    0.83
  -4  20  11    3.08    1.29
   4  20 -11    2.52    1.11
  -4  20  10    0.08    0.86
   4  20 -10    0.32    0.85
  -4  20   9    0.02    0.80
   4  20  -9   -0.25    0.70
  -4  20   8   -0.03    0.81
   4  20  -8   -0.20    0.71
   4  20  -7    1.82    0.96
  -4  20   6    0.60    0.68
   4  20  -6    0.26    0.77
  -4  20   5    0.70    0.69
   4  20  -5    0.41    0.77
  -4  20   4    1.11    0.80
   4  20  -4    1.65    0.94
  -4  20   3    1.33    0.78
   4  20  -3    1.53    0.87
  -4  20   2    4.80    1.18
   4  20  -2    3.10    1.08
  -4  20   1    1.62    0.90
   4  20  -1    2.63    1.00
  -4  20   0    6.38    1.33
   4  20   0    4.51    1.16
  -4  20  -1    0.55    0.74
   4  20   1    0.64    0.72
  -4  20  -2    5.91    1.33
   4  20   2    5.21    1.24
  -4  20  -3    0.97    0.80
   4  20   3   -0.02    0.62
  -4  20  -4    4.37    1.24
   4  20   4    5.72    1.31
   4  20   4    5.00    1.17
  -4  20  -5    0.83    0.83
   4  20   5    0.55    0.76
   4  20   5    0.69    0.80
  -4  20  -6    3.83    1.26
   4  20   6    3.64    1.14
   4  20   6    4.35    1.19
  -4  20  -7    5.61    1.46
   4  20   7    5.31    1.33
   4  20   7    3.89    1.19
  -4  20  -8    2.34    1.15
   4  20   8    1.90    1.01
   4  20   8    1.52    0.94
   4  20   9    5.87    1.46
   4  20   9    7.18    1.56
   4  20  10    1.10    0.97
  -4  21  10   11.96    1.91
  -4  21   9    0.63    0.95
   4  21  -9    0.58    0.90
   4  21  -8   16.04    2.00
   4  21  -7    1.65    1.00
   4  21  -6    9.73    1.69
  -4  21   5    0.94    0.82
   4  21  -5    0.41    0.79
  -4  21   4    9.07    1.52
   4  21  -4    8.93    1.61
  -4  21   3    0.81    0.78
   4  21  -3    1.72    0.95
  -4  21   2    4.59    1.20
   4  21  -2    4.18    1.22
  -4  21   1    0.78    0.78
   4  21  -1    0.44    0.73
  -4  21   0    0.00    0.66
   4  21   0    0.10    0.62
  -4  21  -1    1.40    0.89
   4  21   1    0.22    0.68
  -4  21  -2   -0.17    0.72
   4  21   2    0.19    0.65
  -4  21  -3    1.28    0.90
   4  21   3    0.67    0.79
  -4  21  -4    1.71    1.03
   4  21   4    2.62    1.10
  -4  21  -5    1.10    0.87
   4  21   5   -0.20    0.68
   4  21   5    0.26    0.71
  -4  21  -6    4.56    1.37
   4  21   6    2.81    1.16
   4  21   6    3.79    1.19
   4  21   7    0.12    0.78
   4  21   7    0.17    0.75
   4  21   8    4.59    1.35
   4  21   8    4.35    1.31
   4  21   9    0.39    0.85
   4  22  -6    0.26    0.86
  -4  22   5   -0.50    0.63
   4  22  -5    0.32    0.81
  -4  22   4    0.15    0.72
   4  22  -4    0.34    0.76
  -4  22   3    0.85    0.83
   4  22  -3    0.78    0.90
  -4  22   2    0.04    0.72
   4  22  -2   -0.23    0.64
  -4  22   1   -0.43    0.66
   4  22  -1   -0.11    0.69
  -4  22   0    1.52    0.96
   4  22   0    0.12    0.77
  -4  22  -1    0.12    0.77
   4  22   1    0.32    0.74
  -4  22  -2    1.91    1.04
   4  22   2    2.02    1.03
  -4  22  -3    2.09    1.10
   4  22   3    1.23    0.93
   4  22   4    0.66    0.88
   4  22   5    4.15    1.29
   4  22   7    4.80    1.40
  -4  23   5   -0.37    0.73
  -4  23   4    2.00    1.05
  -4  23   3    0.26    0.77
  -4  23   2    1.24    0.84
  -4  23   1   -0.35    0.69
  -5   0  21   -0.36    0.77
  -5   0  20    0.81    0.86
  -5   0  19   -0.02    0.66
  -5   0  18   -0.02    0.60
  -5   0  17    0.41    0.79
  -5   0  17    0.27    0.54
  -5   0  16    1.44    0.90
  -5   0  16    0.42    0.62
  -5   0  15    0.01    0.71
  -5   0  15    0.14    0.51
  -5   0  14    3.13    0.89
  -5   0  14    3.40    0.84
  -5   0  13   -0.36    0.48
  -5   0  13   -0.06    0.34
  -5   0  12    1.59    0.66
  -5   0  12    1.52    0.60
  -5   0  11    0.83    0.52
  -5   0  10    0.61    0.44
  -5   0   9   -0.24    0.28
  -5   0   7    0.04    0.28
  -5   0   6    1.68    0.24
  -5   0   6    1.29    0.40
  -5   0   5   -0.01    0.13
  -5   0   5    0.03    0.20
  -5   0   3    0.15    0.17
  -5   0   3    0.08    0.17
  -5   0   2    2.68    0.38
  -5   0   2    2.26    0.39
  -5   0   1   -0.05    0.16
  -5   0   0   30.19    1.15
  -5   0  -1   -0.03    0.19
  -5   0  -2    7.00    0.68
  -5   0  -3    0.05    0.24
  -5   0  -5    0.03    0.28
   5   0   5   -0.02    0.32
  -5   0  -6    1.67    0.52
   5   0   6    1.61    0.53
  -5   0  -7    0.21    0.39
   5   0   7    0.02    0.26
   5   0   7   -0.13    0.36
  -5   0  -8   -0.12    0.42
   5   0   8   -0.01    0.30
   5   0   8   -0.12    0.40
  -5   0  -9    0.04    0.49
   5   0   9    0.08    0.37
   5   0   9    0.28    0.50
   5   0  10    6.75    0.89
   5   0  10    5.12    0.93
  -5   0 -11   -0.33    0.58
   5   0  11   -0.05    0.45
   5   0  11   -0.31    0.47
  -5   0 -12    4.71    1.09
   5   0  12    6.98    1.00
   5   0  12    6.26    1.08
  -5   0 -13   -0.76    0.68
   5   0  13   -0.27    0.52
   5   0  13    0.28    0.65
   5   0  14   12.18    1.48
   5   0  15   -0.81    0.59
   5   0  16    7.32    1.38
  -5  -1  21    0.27    0.83
  -5   1  21    0.30    0.80
  -5  -1  20    0.10    0.70
  -5   1  20   -0.20    0.67
  -5  -1  19    0.50    0.78
  -5   1  19    0.24    0.65
  -5  -1  18    0.45    0.67
  -5   1  18    0.04    0.81
  -5   1  18    0.23    0.64
  -5  -1  17    2.83    0.95
  -5   1  17    2.89    1.05
  -5   1  17    1.86    0.86
  -5  -1  16    0.20    0.71
  -5  -1  16   -0.20    0.48
  -5   1  16   -0.69    0.64
  -5   1  16   -0.24    0.45
  -5  -1  15   28.79    1.99
  -5  -1  15   27.89    2.05
  -5   1  15   28.05    2.07
  -5   1  15   29.75    2.08
  -5  -1  14    0.18    0.62
  -5  -1  14   -0.02    0.45
  -5   1  14    0.71    0.68
  -5   1  14    0.48    0.50
  -5  -1  13   11.36    1.26
  -5  -1  13   11.13    1.25
  -5   1  13   12.45    1.30
  -5   1  13   11.87    1.24
  -5  -1  12   -0.41    0.41
  -5  -1  12    0.03    0.36
  -5   1  12   -0.19    0.46
  -5  -1  11  122.43    3.27
  -5   1  11  117.59    3.33
  -5  -1  10   -0.17    0.32
  -5   1  10    0.20    0.37
  -5  -1   9   62.25    2.15
  -5   1   9   60.70    2.21
  -5  -1   8    0.93    0.39
  -5   1   8    0.73    0.40
  -5  -1   7  320.74    2.65
  -5  -1   7  298.05    4.28
  -5   1   7  305.68    4.50
  -5  -1   6    0.40    0.17
  -5  -1   6    0.33    0.25
  -5   1   6    0.06    0.16
  -5   1   6    0.13    0.23
  -5  -1   5  144.45    1.94
  -5  -1   5  159.59    2.91
  -5   1   5  127.50    1.66
  -5   1   5  137.38    2.77
  -5  -1   4    2.03    0.31
  -5  -1   4    1.47    0.36
  -5   1   4    1.90    0.31
  -5   1   4    1.64    0.38
  -5  -1   3   71.52    1.52
  -5  -1   3   77.38    1.92
  -5   1   3   64.50    1.40
  -5   1   3   65.34    1.78
  -5  -1   2    2.81    0.39
  -5   1   2    2.59    0.39
  -5   1   2    2.76    0.42
  -5  -1   1   40.97    1.28
  -5   1   1   49.81    1.41
  -5  -1   0    4.58    0.52
  -5   1   0    4.41    0.55
  -5  -1  -1   94.50    2.10
  -5   1  -1   87.42    2.03
  -5  -1  -2   10.52    0.79
  -5   1  -2   11.77    0.85
  -5  -1  -4    6.47    0.73
  -5  -1  -5    0.44    0.36
  -5   1  -5    0.33    0.37
   5  -1   5    0.61    0.41
  -5  -1  -6    2.19    0.57
  -5   1  -6    2.61    0.63
   5  -1   6    2.08    0.60
   5   1   6    2.40    0.53
   5   1   6    2.28    0.56
  -5  -1  -7    6.43    0.87
  -5   1  -7    5.67    0.86
   5  -1   7    4.96    0.78
   5   1   7    6.33    0.76
   5   1   7    4.53    0.72
  -5  -1  -8    8.81    1.03
  -5   1  -8    9.50    1.10
   5  -1   8   11.63    0.96
   5  -1   8    8.69    1.01
   5   1   8   11.17    1.00
   5   1   8   10.33    1.03
  -5  -1  -9    0.63    0.54
  -5   1  -9    0.39    0.54
   5  -1   9    0.62    0.40
   5  -1   9    0.36    0.51
   5   1   9    0.56    0.44
   5   1   9    0.73    0.55
  -5  -1 -10    1.22    0.66
  -5   1 -10    1.21    0.68
   5  -1  10    1.02    0.51
   5  -1  10    1.39    0.66
   5   1  10    0.21    0.42
   5   1  10    1.13    0.62
  -5  -1 -11    0.63    0.68
  -5   1 -11    0.19    0.66
   5  -1  11    0.56    0.49
   5  -1  11    0.21    0.57
   5   1  11    0.40    0.50
   5   1  11    0.74    0.60
  -5  -1 -12   -0.06    0.64
  -5   1 -12   -0.05    0.73
   5  -1  12    0.11    0.58
   5   1  12    0.41    0.53
   5   1  12    0.41    0.64
  -5  -1 -13    0.58    0.83
  -5   1 -13    0.37    0.76
   5  -1  13    0.19    0.65
   5   1  13   -0.09    0.51
   5   1  13   -0.32    0.62
   5  -1  14    0.36    0.72
   5   1  14    0.36    0.71
   5   1  14    0.28    0.66
   5  -1  15    1.37    0.84
   5   1  15    1.21    0.80
   5  -1  16    0.68    0.79
   5  -1  17    0.03    0.81
   5  -1  18   -0.19    0.87
  -5  -2  21    0.50    0.90
  -5   2  21    0.08    0.84
  -5  -2  20   -0.17    0.73
  -5   2  20   -0.08    0.71
  -5  -2  19   -0.04    0.70
  -5   2  19   -0.60    0.80
  -5   2  19    0.90    0.77
  -5  -2  18    0.20    0.64
  -5   2  18    0.26    0.83
  -5   2  18    0.30    0.64
  -5  -2  17   -0.07    0.59
  -5   2  17   -0.06    0.73
  -5   2  17    0.31    0.56
  -5  -2  16    3.51    1.01
  -5   2  16    1.43    0.93
  -5   2  16    3.46    0.99
  -5  -2  15    3.87    0.97
  -5  -2  15    3.43    0.97
  -5   2  15    4.21    1.10
  -5   2  15    1.92    0.79
  -5  -2  14    5.62    1.01
  -5  -2  14    5.78    1.07
  -5   2  14    5.51    1.14
  -5   2  14    6.08    1.03
  -5  -2  13   -0.11    0.50
  -5  -2  13   -0.06    0.34
  -5   2  13    0.17    0.57
  -5   2  13    0.07    0.34
  -5  -2  12    4.78    0.86
  -5  -2  12    4.92    0.91
  -5   2  12    5.40    1.00
  -5  -2  11    1.89    0.62
  -5  -2  11    1.88    0.61
  -5   2  11    1.99    0.70
  -5  -2  10    4.75    0.76
  -5   2  10    5.11    0.85
  -5  -2   9    0.12    0.30
  -5   2   9    0.14    0.36
  -5  -2   8    5.04    0.68
  -5   2   8    4.99    0.75
  -5  -2   7    0.00    0.24
  -5   2   7    0.11    0.27
  -5  -2   6    0.10    0.20
  -5  -2   6    0.07    0.13
  -5   2   6    0.02    0.17
  -5   2   6   -0.03    0.21
  -5  -2   5    4.03    0.41
  -5  -2   5    4.78    0.54
  -5  -2   5    3.84    0.40
  -5   2   5    4.02    0.42
  -5   2   5    4.05    0.57
  -5  -2   3    3.46    0.41
  -5  -2   3    3.77    0.42
  -5   2   3    3.83    0.45
  -5   2   3    4.20    0.54
  -5  -2   2    3.41    0.42
  -5  -2   2    3.28    0.41
  -5   2   2    3.09    0.45
  -5   2   2    2.92    0.43
  -5  -2   1    4.67    0.50
  -5   2   1    5.91    0.57
  -5  -2   0   43.23    1.41
  -5   2   0   40.43    1.38
  -5  -2  -1   36.38    1.35
  -5   2  -1   32.90    1.31
  -5  -2  -2    9.05    0.76
  -5   2  -2    9.39    0.82
  -5  -2  -3   12.73    0.91
  -5   2  -3   11.26    0.92
  -5  -2  -5   13.71    1.04
  -5   2  -5   12.45    1.05
   5  -2   5   13.96    1.06
   5   2   5   16.52    1.07
  -5  -2  -6    0.31    0.34
  -5   2  -6   -0.07    0.36
   5  -2   6    0.58    0.45
   5   2   6    0.16    0.28
   5   2   6    0.21    0.39
  -5  -2  -7   33.30    1.64
  -5   2  -7   29.76    1.62
   5  -2   7   29.01    1.60
   5   2   7   37.88    1.71
   5   2   7   31.89    1.48
  -5  -2  -8    3.21    0.75
  -5   2  -8    2.89    0.77
   5  -2   8    3.21    0.77
   5   2   8    4.85    0.78
   5   2   8    3.31    0.68
  -5  -2  -9    7.80    1.06
  -5   2  -9    8.80    1.15
   5  -2   9    9.69    0.89
   5  -2   9    9.07    1.10
   5   2   9   10.03    1.04
   5   2   9    7.88    0.97
  -5  -2 -10    5.90    0.98
  -5   2 -10    5.62    1.02
   5  -2  10    5.38    0.78
   5  -2  10    3.42    0.87
   5   2  10    3.59    0.79
   5   2  10    4.65    0.87
  -5  -2 -11    3.80    0.94
  -5   2 -11    4.00    1.01
   5  -2  11    3.58    0.89
   5   2  11    4.51    0.89
   5   2  11    3.04    0.81
  -5  -2 -12    3.50    0.98
  -5   2 -12    2.70    0.98
   5  -2  12    4.34    1.01
   5   2  12    4.13    0.90
   5   2  12    3.97    0.91
  -5   2 -13    0.95    0.85
   5  -2  13    1.69    0.81
   5   2  13    1.48    0.70
   5   2  13    1.47    0.78
   5  -2  14    7.42    1.32
   5   2  14   10.75    1.39
   5  -2  15    0.61    0.74
   5   2  15    1.15    0.76
   5  -2  16    7.61    1.44
   5  -2  17    0.07    0.78
   5  -2  18    7.50    1.61
   5  -2  19   -0.50    0.92
  -5  -3  21   -0.06    0.88
  -5   3  21   -0.10    0.76
  -5  -3  20    2.05    1.06
  -5   3  20    1.89    1.02
  -5  -3  19    1.02    0.87
  -5   3  19    2.50    1.23
  -5   3  19    0.29    0.75
  -5  -3  18    1.11    0.83
  -5   3  18    0.73    0.94
  -5   3  18    1.44    0.82
  -5  -3  17    3.98    1.10
  -5   3  17    4.53    1.22
  -5   3  17    3.63    1.02
  -5  -3  16    3.19    1.01
  -5   3  16    4.87    1.21
  -5   3  16    5.44    1.13
  -5  -3  15   13.88    1.55
  -5   3  15   13.96    1.63
  -5   3  15   15.79    1.56
  -5  -3  14    3.29    0.86
  -5  -3  14    2.35    0.76
  -5   3  14    2.01    0.87
  -5   3  14    2.63    0.81
  -5  -3  13   37.37    1.98
  -5  -3  13   35.55    2.14
  -5   3  13   37.31    2.20
  -5  -3  12    1.18    0.59
  -5  -3  12    1.26    0.59
  -5   3  12    0.91    0.64
  -5  -3  11   51.31    2.06
  -5  -3  11   46.55    2.23
  -5   3  11   47.61    2.24
  -5  -3  10    0.86    0.44
  -5  -3  10    0.19    0.34
  -5   3  10    0.52    0.53
  -5  -3   9   81.84    2.37
  -5   3   9   76.18    2.57
  -5  -3   8    2.76    0.54
  -5   3   8    1.78    0.54
   5   3  -8    1.68    0.34
  -5  -3   7  223.20    3.62
  -5   3   7  213.08    3.92
   5   3  -7  206.19    2.60
  -5  -3   6    2.56    0.48
  -5   3   6    3.13    0.36
  -5   3   6    2.17    0.52
   5   3  -6    2.46    0.41
  -5  -3   5  138.14    2.68
  -5   3   5  139.34    1.89
  -5   3   5  114.25    2.64
   5   3  -5  125.82    2.13
  -5  -3   3   82.71    1.82
  -5   3   3   79.35    1.65
  -5   3   3   83.74    2.07
  -5  -3   2    5.19    0.53
  -5  -3   2    4.24    0.48
  -5   3   2    4.57    0.55
  -5   3   2    4.51    0.52
  -5  -3   1  186.13    2.90
  -5  -3   1  177.14    2.83
  -5   3   1  167.16    2.66
  -5   3   1  178.32    2.79
  -5  -3   0    1.17    0.33
  -5  -3   0    0.86    0.28
  -5   3   0    1.06    0.38
  -5   3   0    0.87    0.28
  -5  -3  -1   59.16    1.75
  -5   3  -1   52.82    1.67
  -5  -3  -2   70.08    1.97
  -5   3  -2   61.11    1.87
  -5  -3  -3   15.76    1.02
  -5   3  -3   14.70    1.06
  -5  -3  -4   42.36    1.65
  -5   3  -4   37.63    1.62
   5   3   4   37.57    1.54
  -5  -3  -5    0.08    0.30
  -5   3  -5    0.40    0.42
   5  -3   5   -0.07    0.34
   5   3   5    0.09    0.28
  -5  -3  -6   39.05    1.72
  -5   3  -6   35.59    1.71
   5  -3   6   36.43    1.72
   5   3   6   45.00    1.84
  -5  -3  -7    3.39    0.72
  -5   3  -7    2.61    0.72
   5  -3   7    2.77    0.70
   5   3   7    3.48    0.70
   5   3   7    2.89    0.60
  -5  -3  -8   81.25    2.61
  -5   3  -8   70.87    2.53
   5  -3   8   79.35    2.70
   5   3   8   87.76    2.74
   5   3   8   78.89    2.28
  -5  -3  -9    1.63    0.64
  -5   3  -9    1.88    0.76
   5  -3   9    2.80    0.79
   5   3   9    1.33    0.56
   5   3   9    1.72    0.59
  -5  -3 -10   22.76    1.59
  -5   3 -10   24.17    1.75
   5  -3  10   21.34    1.63
   5   3  10   23.29    1.60
   5   3  10   21.84    1.45
  -5  -3 -11    2.10    0.82
  -5   3 -11    2.35    0.90
   5  -3  11    2.26    0.84
   5   3  11    3.09    0.80
   5   3  11    2.75    0.77
  -5  -3 -12   15.91    1.54
  -5   3 -12   16.59    1.64
   5  -3  12   16.21    1.59
   5   3  12   16.15    1.45
   5   3  12   13.77    1.33
  -5   3 -13    0.31    0.77
   5  -3  13    0.50    0.71
   5   3  13    0.86    0.76
   5  -3  14    8.95    1.43
   5   3  14    8.79    1.34
   5  -3  15    1.70    0.90
   5   3  15    1.81    0.89
   5  -3  16    3.73    1.21
   5  -3  17   -0.21    0.78
   5  -3  18    1.16    1.07
   5  -3  19   -0.54    0.99
  -5  -4  20    0.68    0.88
  -5   4  20    0.97    1.09
  -5  -4  19    4.79    1.34
  -5   4  19    3.77    1.30
  -5   4  19    3.01    1.12
  -5  -4  18    0.41    0.70
  -5   4  18    0.74    0.91
  -5   4  18    0.62    0.71
  -5  -4  17   13.06    1.71
  -5   4  17   13.32    1.77
  -5   4  17   12.27    1.58
  -5  -4  16    1.88    0.84
  -5   4  16    1.12    0.91
  -5   4  16    2.12    0.81
  -5  -4  15    4.06    1.04
  -5   4  15    6.93    1.31
  -5   4  15    4.89    1.03
  -5  -4  14    1.86    0.74
  -5   4  14    1.06    0.80
  -5   4  14    1.28    0.60
  -5  -4  13   26.60    1.68
  -5  -4  13   25.15    1.84
  -5   4  13   27.35    1.98
  -5  -4  12    1.04    0.57
  -5  -4  12    0.78    0.51
  -5   4  12    0.67    0.65
  -5  -4  11    4.61    0.77
  -5  -4  11    4.28    0.82
  -5   4  11    4.64    0.93
  -5  -4  10    0.23    0.35
  -5   4  10    0.44    0.47
  -5  -4   9   17.90    1.14
  -5  -4   9   16.23    1.24
  -5   4   9   18.73    1.38
   5   4  -9   18.64    0.89
  -5  -4   8    0.73    0.37
  -5   4   8    0.34    0.40
   5   4  -8    0.02    0.25
  -5  -4   7    3.68    0.55
  -5   4   7    4.12    0.36
  -5   4   7    3.48    0.64
   5   4  -7    3.41    0.48
  -5  -4   6    1.01    0.35
  -5   4   6    1.03    0.27
  -5   4   6    0.92    0.45
   5   4  -6    0.95    0.33
  -5  -4   5    7.05    0.64
  -5   4   5    6.93    0.58
  -5   4   5    5.85    0.72
   5   4  -5    7.03    0.62
  -5   4   4    8.90    0.77
  -5   4   3   10.37    0.74
  -5   4   3   10.72    0.81
   5   4  -3   10.99    0.76
  -5   4   2    2.89    0.51
  -5   4   2    3.45    0.49
   5   4  -2    4.21    0.54
  -5  -4   1   10.88    0.77
  -5   4   1    9.94    0.80
  -5   4   1   12.24    0.77
  -5  -4   0    1.61    0.38
  -5  -4   0    1.22    0.34
  -5   4   0    1.34    0.41
  -5   4   0    1.31    0.32
  -5  -4  -1   94.50    2.28
  -5  -4  -1   90.77    2.23
  -5   4  -1   84.03    2.15
  -5   4  -1   90.94    1.89
  -5  -4  -2    9.81    0.83
  -5  -4  -2    7.20    0.72
  -5   4  -2    8.97    0.89
  -5  -4  -3   93.16    2.41
  -5   4  -3   79.87    2.28
  -5  -4  -4    6.50    0.76
  -5   4  -4    7.16    0.87
   5   4   4    6.32    0.72
  -5  -4  -5   68.31    2.20
  -5   4  -5   61.48    2.16
   5  -4   5   62.03    2.17
   5   4   5   67.78    2.21
  -5  -4  -6    1.39    0.49
  -5   4  -6    0.93    0.54
   5  -4   6    0.90    0.53
   5   4   6    1.19    0.49
  -5  -4  -7   95.35    2.74
  -5   4  -7   86.77    2.73
   5  -4   7   77.44    2.62
   5   4   7   88.34    2.73
   5   4   7   83.87    2.14
  -5  -4  -8    2.73    0.70
  -5   4  -8    1.92    0.74
   5  -4   8    2.18    0.73
   5   4   8    2.30    0.64
   5   4   8    2.43    0.61
  -5  -4  -9   18.18    1.40
  -5   4  -9   20.06    1.60
   5  -4   9   19.03    1.51
   5   4   9   21.45    1.53
   5   4   9   20.27    1.30
  -5  -4 -10    4.54    0.92
  -5   4 -10    3.95    0.98
   5  -4  10    3.34    0.90
   5   4  10    4.97    0.93
   5   4  10    4.47    0.80
  -5  -4 -11    2.55    0.82
  -5   4 -11    3.30    0.98
   5  -4  11    2.23    0.82
   5   4  11    2.77    0.81
  -5  -4 -12    8.83    1.28
  -5   4 -12    9.72    1.39
   5  -4  12   10.64    1.41
   5   4  12   11.04    1.34
  -5   4 -13    0.24    0.81
   5  -4  13   -0.09    0.67
   5   4  13    0.33    0.67
   5  -4  14    3.15    1.06
   5   4  14    4.18    1.05
   5  -4  15    1.21    0.87
   5   4  15    1.13    0.88
   5  -4  16    4.09    1.28
   5   4  16    6.68    1.35
   5  -4  17   -0.45    0.80
   5  -4  18    5.20    1.50
   5  -4  19    0.12    1.02
  -5  -5  20    3.19    1.20
  -5   5  20    3.71    1.41
  -5  -5  19    1.67    0.94
  -5   5  19    1.98    1.18
  -5  -5  18    0.75    0.75
  -5   5  18    1.92    1.13
  -5   5  18    1.89    0.91
  -5  -5  17    5.15    1.27
  -5   5  17    2.85    1.15
  -5   5  17    4.54    1.11
  -5  -5  16    3.51    1.04
  -5   5  16    2.98    1.07
  -5   5  16    3.81    1.00
  -5  -5  15    8.87    1.38
  -5   5  15   10.20    1.55
  -5   5  15   10.76    1.38
  -5  -5  14    6.09    1.13
  -5   5  14    6.26    1.23
  -5  -5  13   11.46    1.31
  -5   5  13   12.07    1.50
  -5  -5  12    0.10    0.46
  -5  -5  12    0.17    0.38
  -5   5  12    0.10    0.62
  -5  -5  11   36.08    1.69
  -5  -5  11   29.51    1.83
  -5   5  11   37.74    2.12
  -5  -5  10    0.49    0.40
  -5  -5  10    0.33    0.36
  -5   5  10   -0.02    0.48
  -5  -5   9   26.72    1.35
  -5  -5   9   21.84    1.46
  -5   5   9   21.61    1.50
   5   5  -9   24.13    1.11
  -5  -5   8    1.01    0.40
  -5  -5   8    0.88    0.40
  -5   5   8    1.28    0.55
   5   5  -8    0.61    0.34
  -5  -5   7   93.18    2.31
  -5   5   7  100.54    1.63
  -5   5   7   75.85    2.48
   5   5  -7   83.00    1.98
  -5  -5   6    0.31    0.25
  -5   5   6    0.85    0.28
  -5   5   6    0.80    0.46
   5   5  -6    0.49    0.30
  -5  -5   5   42.86    1.51
  -5   5   5   41.23    1.24
  -5   5   5   34.86    1.57
   5   5  -5   39.85    1.41
  -5   5   4    0.49    0.31
  -5   5   4    1.06    0.37
   5   5  -4    0.76    0.32
  -5   5   3    8.90    0.74
  -5   5   3    7.39    0.70
   5   5  -3    8.92    0.75
  -5   5   2    7.53    0.73
  -5   5   2    7.50    0.68
   5   5  -2    7.12    0.69
  -5   5   1   34.95    1.38
  -5   5   1   35.72    1.30
   5   5  -1   39.23    1.49
  -5   5   0   26.60    1.28
  -5   5   0   26.95    1.08
   5   5   0   30.10    1.35
  -5  -5  -1    0.03    0.21
  -5  -5  -1    0.08    0.21
  -5   5  -1    0.02    0.34
  -5   5  -1    0.08    0.18
  -5  -5  -2   70.34    2.11
  -5  -5  -2   67.63    2.06
  -5   5  -2   64.70    2.05
  -5   5  -2   69.24    1.61
  -5  -5  -3    6.79    0.78
  -5  -5  -3    7.99    0.79
  -5   5  -3    7.02    0.87
  -5   5  -3    7.55    0.57
   5   5   3    8.21    0.80
  -5  -5  -4   93.00    2.52
  -5   5  -4   68.13    2.24
   5   5   4   76.00    2.32
  -5  -5  -5    3.41    0.66
  -5   5  -5    3.76    0.77
   5  -5   5    3.53    0.72
   5   5   5    3.27    0.64
  -5  -5  -6   64.90    2.26
  -5   5  -6   58.68    2.26
   5  -5   6   59.98    2.30
   5   5   6   68.58    2.40
  -5  -5  -7    7.32    0.96
  -5   5  -7    5.71    0.99
   5  -5   7    6.12    0.95
   5   5   7    5.98    0.87
  -5  -5  -8   51.24    2.14
  -5   5  -8   50.46    2.27
   5  -5   8   48.88    2.25
   5   5   8   59.17    2.40
   5   5   8   53.00    1.78
  -5  -5  -9    0.30    0.45
  -5   5  -9   -0.10    0.58
   5  -5   9   -0.04    0.51
   5   5   9    0.12    0.46
  -5  -5 -10   51.88    2.31
  -5   5 -10   47.23    2.36
   5  -5  10   39.24    2.22
   5   5  10   45.68    2.29
  -5  -5 -11    4.17    0.95
  -5   5 -11    2.29    0.92
   5  -5  11    3.48    0.97
   5   5  11    4.02    0.95
  -5  -5 -12   13.28    1.43
  -5   5 -12   12.76    1.54
   5  -5  12   11.69    1.51
   5   5  12   15.29    1.55
  -5   5 -13    0.20    0.77
   5  -5  13    1.02    0.82
   5   5  13    0.77    0.74
   5  -5  14   16.57    1.81
   5   5  14   19.05    1.83
   5  -5  15    1.59    0.94
   5   5  15    0.95    0.83
   5  -5  16    1.79    1.01
   5   5  16    3.36    1.10
   5  -5  17   -0.02    0.83
   5   5  17    0.13    0.78
   5  -5  18    0.71    1.04
   5  -5  19   -0.50    0.96
  -5  -6  20    0.23    0.78
  -5   6  20   -0.03    1.08
  -5  -6  19    5.97    1.47
  -5   6  19    6.44    1.56
  -5  -6  18   -0.30    0.60
  -5   6  18    0.13    0.80
  -5  -6  17    4.28    1.14
  -5   6  17    5.12    1.33
  -5  -6  16   -0.11    0.51
  -5   6  16    0.17    0.81
  -5   6  16    0.22    0.60
  -5  -6  15   14.02    1.60
  -5   6  15   15.25    1.78
  -5   6  15   13.44    1.45
  -5  -6  14    0.58    0.58
  -5   6  14    0.16    0.74
  -5  -6  13   10.53    1.36
  -5   6  13   11.41    1.45
  -5  -6  12   -0.32    0.34
  -5   6  12    0.01    0.61
  -5  -6  11    4.67    0.73
  -5  -6  11    5.03    0.92
  -5   6  11    5.59    1.06
  -5  -6  10   -0.19    0.28
  -5  -6  10    0.22    0.33
  -5   6  10   -0.02    0.50
  -5  -6   9    0.90    0.39
  -5  -6   9    0.84    0.42
  -5   6   9    0.75    0.55
   5   6  -9    0.38    0.34
  -5  -6   8    0.26    0.28
  -5  -6   8    0.10    0.27
  -5   6   8   -0.17    0.42
   5   6  -8   -0.18    0.26
  -5  -6   7    4.51    0.60
  -5  -6   7    3.20    0.61
  -5   6   7    4.44    0.49
  -5   6   7    3.29    0.70
   5   6  -7    3.62    0.57
  -5  -6   6    0.82    0.34
  -5   6   6    0.34    0.26
  -5   6   6    0.80    0.47
   5   6  -6    0.50    0.34
  -5   6   5   38.84    1.30
  -5   6   5   31.59    1.54
   5   6  -5   33.65    1.39
  -5   6   3   84.68    2.04
  -5   6   3   78.64    2.14
   5   6  -3   90.29    2.27
  -5   6   2    1.08    0.43
  -5   6   2    1.10    0.38
   5   6  -2    1.00    0.38
  -5   6   1  181.29    3.17
  -5   6   1  175.55    2.91
   5   6  -1  189.20    3.36
  -5   6   0    0.68    0.40
  -5   6   0    0.56    0.29
   5   6   0    0.75    0.37
  -5   6  -1  125.32    2.83
  -5   6  -1  128.57    2.27
   5   6   1  136.11    2.95
  -5  -6  -2    0.55    0.36
  -5  -6  -2    0.65    0.35
  -5   6  -2    0.70    0.45
  -5   6  -2    0.42    0.24
  -5  -6  -3  213.32    3.85
  -5  -6  -3  196.05    3.69
  -5   6  -3  189.85    3.68
  -5   6  -3  205.56    2.67
   5   6   3  192.92    3.68
  -5   6  -4    0.82    0.49
  -5  -6  -5   67.57    2.29
  -5  -6  -5   65.23    2.25
  -5   6  -5   61.64    2.29
   5  -6   5   57.66    2.22
   5   6   5   69.00    2.38
  -5  -6  -6    2.47    0.61
  -5   6  -6    3.11    0.77
   5  -6   6    3.09    0.77
   5   6   6    2.79    0.67
  -5  -6  -7  118.21    3.17
  -5   6  -7  110.76    3.21
   5  -6   7   99.06    3.10
   5   6   7  120.21    3.36
  -5  -6  -8    0.99    0.54
  -5   6  -8    0.19    0.60
   5  -6   8    0.06    0.48
   5   6   8    0.48    0.47
  -5  -6  -9   25.28    1.64
  -5   6  -9   21.01    1.68
   5  -6   9   20.91    1.64
   5   6   9   24.37    1.71
  -5  -6 -10    1.33    0.69
  -5   6 -10    1.99    0.84
   5  -6  10    0.53    0.65
   5   6  10    1.37    0.67
  -5  -6 -11   10.45    1.32
  -5   6 -11    8.56    1.34
   5  -6  11    6.98    1.22
   5   6  11    9.24    1.28
  -5  -6 -12    6.42    1.13
  -5   6 -12    4.20    1.10
   5  -6  12    4.43    1.10
   5   6  12    5.44    1.12
  -5   6 -13    1.74    0.93
   5  -6  13    1.65    0.91
   5   6  13    2.06    0.94
   5  -6  14    1.94    0.98
   5   6  14    3.14    1.06
   5  -6  15    1.52    0.93
   5   6  15    0.39    0.78
   5  -6  16    0.15    0.84
   5   6  16    0.53    0.83
   5  -6  17   -0.11    0.87
   5   6  17    0.49    0.87
   5  -6  18   -0.16    0.96
   5   6  18   -0.29    0.84
  -5  -7  20    1.32    1.05
  -5   7  20    3.22    1.36
  -5  -7  19   -0.10    0.68
  -5   7  19    0.80    1.02
  -5  -7  18    5.06    1.33
  -5   7  18    7.04    1.57
  -5  -7  17    0.91    0.72
  -5   7  17    1.36    1.00
  -5  -7  16    1.94    0.87
  -5   7  16    2.73    1.11
  -5  -7  15   -0.07    0.50
  -5   7  15    0.11    0.77
  -5   7  15    0.08    0.51
  -5  -7  14    9.49    1.37
  -5   7  14    7.64    1.36
  -5  -7  13    0.76    0.61
  -5   7  13    1.23    0.82
  -5  -7  12    0.36    0.46
  -5   7  12    0.80    0.73
  -5  -7  11    0.35    0.40
  -5   7  11    1.04    0.73
  -5  -7  10    0.70    0.41
  -5  -7  10    1.15    0.51
  -5   7  10    1.32    0.69
  -5  -7   9    3.01    0.56
  -5  -7   9    3.18    0.71
  -5   7   9    3.43    0.86
   5   7  -9    3.07    0.60
  -5  -7   8    1.37    0.42
  -5  -7   8    0.93    0.46
  -5   7   8    0.69    0.53
   5   7  -8    1.40    0.49
  -5  -7   7    9.24    0.78
  -5  -7   7    7.46    0.83
  -5   7   7    9.62    0.70
  -5   7   7    5.34    0.83
   5   7  -7    9.48    0.86
  -5  -7   6    1.18    0.37
  -5  -7   6    0.89    0.38
  -5   7   6    1.33    0.37
  -5   7   6    0.73    0.50
   5   7  -6    0.95    0.42
  -5   7   5    3.85    0.55
  -5   7   5    3.03    0.62
   5   7  -5    3.47    0.60
  -5   7   4   28.79    1.26
  -5   7   3    0.23    0.33
  -5   7   3    0.39    0.36
   5   7  -3    0.16    0.29
  -5   7   2   10.67    0.91
  -5   7   2   11.00    0.85
   5   7  -2   11.17    0.92
  -5   7   1    0.81    0.43
  -5   7   1    0.21    0.26
   5   7  -1    0.60    0.35
  -5   7   0   31.49    1.50
  -5   7   0   33.24    1.26
   5   7   0   36.42    1.60
  -5   7  -1    0.48    0.42
  -5   7  -1    0.52    0.26
   5   7   1    0.74    0.40
  -5   7  -2   38.34    1.75
  -5   7  -2   40.44    1.25
   5   7   2   42.94    1.78
  -5  -7  -3    3.05    0.63
  -5  -7  -3    3.55    0.65
  -5   7  -3    2.54    0.66
  -5   7  -3    3.01    0.40
   5   7   3    2.45    0.57
  -5  -7  -4   68.00    2.31
  -5  -7  -4   69.50    2.33
  -5   7  -4   68.62    2.39
  -5   7  -4   64.64    1.43
   5   7   4   63.35    2.28
  -5  -7  -5    3.42    0.69
  -5  -7  -5    2.93    0.64
  -5   7  -5    2.05    0.69
   5  -7   5    2.33    0.68
   5   7   5    2.22    0.64
  -5  -7  -6   50.95    2.11
  -5  -7  -6   49.37    2.08
  -5   7  -6   48.71    2.19
   5  -7   6   42.40    2.06
   5   7   6   51.13    2.21
  -5  -7  -7    2.05    0.63
  -5   7  -7    1.99    0.75
   5  -7   7    1.92    0.71
   5   7   7    2.11    0.66
  -5  -7  -8   52.80    2.25
  -5   7  -8   47.53    2.31
   5  -7   8   45.67    2.29
   5   7   8   53.03    2.41
  -5  -7  -9    1.35    0.65
  -5   7  -9    1.29    0.76
   5  -7   9    1.03    0.70
   5   7   9    1.56    0.69
  -5  -7 -10   48.90    2.31
  -5   7 -10   46.02    2.41
   5  -7  10   41.72    2.38
   5   7  10   41.51    2.34
  -5  -7 -11    0.23    0.58
  -5   7 -11    0.31    0.71
   5  -7  11    0.25    0.63
   5   7  11    0.09    0.55
  -5  -7 -12   13.18    1.45
  -5   7 -12   11.44    1.52
   5  -7  12    7.97    1.36
   5   7  12    9.45    1.37
  -5   7 -13   -0.88    0.59
   5  -7  13    0.34    0.74
   5   7  13   -0.07    0.76
  -5   7 -14   15.26    1.74
   5  -7  14   14.91    1.79
   5   7  14   16.69    1.82
   5  -7  15   -0.17    0.77
   5   7  15    0.41    0.77
   5  -7  16    2.24    1.11
   5   7  16    3.38    1.20
   5  -7  17   -0.14    0.87
   5   7  17    0.24    0.86
   5  -7  18    1.22    1.14
   5   7  18    0.58    1.02
  -5  -8  20    0.57    0.85
  -5  -8  19    2.95    1.17
  -5   8  19    4.72    1.50
  -5  -8  18    0.33    0.73
  -5   8  18    0.65    0.91
  -5  -8  17    8.28    1.52
  -5   8  17    9.07    1.62
  -5  -8  16    0.21    0.62
  -5   8  16    0.05    0.73
  -5  -8  15   10.51    1.49
  -5   8  15   11.63    1.67
  -5  -8  14    0.09    0.56
  -5   8  14    0.34    0.79
  -5  -8  13   12.67    1.44
  -5   8  13   14.19    1.67
  -5  -8  12    0.23    0.47
  -5   8  12   -0.14    0.65
  -5  -8  11    4.00    0.87
  -5   8  11    3.53    1.00
  -5  -8  10    0.27    0.36
  -5   8  10   -0.36    0.55
  -5  -8   9    0.06    0.28
  -5  -8   9    0.79    0.45
  -5   8   9   -0.12    0.53
   5   8  -9    0.04    0.34
  -5  -8   8    0.98    0.39
  -5  -8   8    1.29    0.49
  -5   8   8    0.78    0.60
   5   8  -8    0.99    0.47
  -5  -8   7    8.40    0.74
  -5  -8   7    7.73    0.85
  -5   8   7   10.40    0.79
  -5   8   7    7.89    1.01
   5   8  -7    7.66    0.84
  -5  -8   6   -0.04    0.22
  -5  -8   6    0.19    0.26
  -5   8   6   -0.23    0.24
  -5   8   6    0.25    0.47
   5   8  -6    0.05    0.30
  -5  -8   5   20.79    1.20
  -5   8   5   22.50    1.15
  -5   8   5   20.38    1.37
   5   8  -5   21.67    1.27
  -5   8   4    1.92    0.47
  -5   8   4    1.85    0.53
   5   8  -4    1.75    0.49
  -5  -8   3   73.89    1.93
  -5   8   3   84.12    2.27
  -5   8   3   75.92    2.26
   5   8  -3   81.08    2.39
  -5   8   2    0.55    0.38
  -5   8   2    0.18    0.32
   5   8  -2    0.67    0.38
  -5   8   1   84.75    2.40
  -5   8   1   79.84    2.08
   5   8  -1   90.05    2.55
  -5   8   0    0.24    0.39
  -5   8   0   -0.01    0.23
   5   8   0    0.09    0.29
  -5   8  -1   70.76    2.32
  -5   8  -1   70.17    1.74
   5   8   1   75.06    2.40
  -5   8  -2    0.47    0.42
  -5   8  -2    0.94    0.31
   5   8   2    1.27    0.45
   5   8   2    0.69    0.42
  -5   8  -3   40.65    1.88
  -5   8  -3   41.29    1.20
   5   8   3   39.75    1.82
   5   8   3   36.46    1.75
  -5  -8  -4    0.19    0.33
  -5  -8  -4   -0.04    0.27
  -5   8  -4    0.41    0.46
   5   8   4    0.24    0.37
  -5  -8  -5   29.94    1.66
  -5  -8  -5   26.60    1.57
  -5   8  -5   27.71    1.72
   5  -8   5   23.88    1.57
   5   8   5   28.36    1.68
  -5  -8  -6    2.26    0.64
  -5  -8  -6    1.63    0.57
  -5   8  -6    2.01    0.73
   5  -8   6    2.14    0.70
   5   8   6    1.86    0.64
  -5  -8  -7   46.43    2.13
  -5  -8  -7   50.05    2.20
  -5   8  -7   48.15    2.30
   5  -8   7   41.88    2.18
   5   8   7   43.79    2.16
  -5  -8  -8    1.29    0.62
  -5   8  -8    0.40    0.59
   5  -8   8    0.51    0.57
   5   8   8    0.03    0.43
  -5  -8  -9    7.90    1.13
  -5   8  -9    5.93    1.15
   5  -8   9    4.52    1.03
   5   8   9    7.14    1.13
  -5  -8 -10    0.08    0.50
  -5   8 -10   -0.16    0.60
   5  -8  10   -0.06    0.60
   5   8  10    0.53    0.64
  -5  -8 -11    7.20    1.19
  -5   8 -11    8.68    1.35
   5  -8  11    6.19    1.21
   5   8  11    7.71    1.25
  -5   8 -12    0.25    0.74
   5  -8  12   -0.03    0.67
   5   8  12    0.83    0.75
  -5   8 -13    1.81    0.94
   5  -8  13    0.76    0.79
   5   8  13    1.46    0.88
  -5   8 -14    1.02    0.90
   5  -8  14    0.47    0.87
   5   8  14    1.10    0.85
   5  -8  15    0.94    0.90
   5   8  15    1.68    0.95
   5  -8  16    0.24    0.88
   5   8  16    0.36    0.85
   5  -8  17    0.84    1.02
   5   8  17    1.25    1.02
   5  -8  18   -0.37    0.91
   5   8  18    0.07    0.93
  -5  -9  19    0.23    0.69
  -5   9  19    1.52    1.14
  -5  -9  18    7.16    1.55
  -5   9  18    7.10    1.62
  -5  -9  17    2.20    1.01
  -5   9  17    3.96    1.31
  -5  -9  16    4.19    1.18
  -5   9  16    2.01    1.13
  -5  -9  15    0.01    0.60
  -5   9  15    0.35    0.75
  -5  -9  14    8.78    1.38
  -5   9  14    8.18    1.46
  -5  -9  13    2.64    0.91
  -5   9  13    3.60    1.11
  -5  -9  12    4.06    0.96
  -5   9  12    5.27    1.13
  -5  -9  11    2.46    0.79
  -5   9  11    2.42    0.94
  -5   9  10    1.86    0.83
  -5  -9   9   -0.04    0.27
  -5   9   9   -0.20    0.51
   5   9  -9    0.33    0.40
  -5  -9   8    1.91    0.59
  -5   9   8    1.29    0.70
   5   9  -8    1.54    0.55
  -5  -9   7    9.07    0.78
  -5  -9   7    6.76    0.83
  -5   9   7    9.35    0.83
  -5   9   7    6.30    0.99
   5   9  -7    9.10    0.96
  -5  -9   6    2.81    0.58
  -5   9   6    4.28    0.63
  -5   9   6    2.86    0.71
   5   9  -6    3.90    0.71
  -5  -9   5    0.14    0.21
  -5   9   5   -0.22    0.27
  -5   9   5   -0.01    0.41
   5   9  -5    0.12    0.31
  -5   9   4    2.19    0.49
  -5   9   4    1.86    0.56
   5   9  -4    1.09    0.44
  -5  -9   3    5.26    0.57
  -5   9   3    6.45    0.79
  -5   9   3    6.08    0.79
   5   9  -3    6.97    0.83
  -5  -9   2   13.07    0.80
  -5   9   2   14.89    1.11
  -5   9   2   13.65    1.06
   5   9  -2   15.57    1.16
  -5  -9   1    0.19    0.18
  -5   9   1    0.59    0.42
  -5   9   1    0.23    0.34
   5   9  -1    0.52    0.39
  -5  -9   0    6.68    0.48
  -5   9   0    7.32    0.92
  -5   9   0    6.14    0.68
   5   9   0    7.12    0.84
  -5   9  -1    1.31    0.55
  -5   9  -1    1.67    0.41
   5   9   1    1.31    0.48
  -5   9  -2   25.47    1.55
  -5   9  -2   22.67    0.99
   5   9   2   27.22    1.55
   5   9   2   26.32    1.50
  -5   9  -3    0.84    0.48
   5   9   3    0.25    0.32
   5   9   3    0.06    0.33
  -5   9  -4   42.94    2.06
   5   9   4   47.49    2.07
   5   9   4   46.31    2.09
  -5  -9  -5    2.48    0.70
  -5  -9  -5    3.98    0.77
  -5   9  -5    2.65    0.79
   5  -9   5    2.16    0.71
   5   9   5    2.11    0.68
  -5  -9  -6   22.80    1.55
  -5  -9  -6   23.69    1.56
  -5   9  -6   21.21    1.63
   5  -9   6   19.52    1.56
   5   9   6   23.00    1.63
  -5  -9  -7    3.89    0.83
  -5  -9  -7    2.69    0.69
  -5   9  -7    3.04    0.86
   5  -9   7    2.86    0.82
   5   9   7    2.55    0.76
  -5  -9  -8   35.27    1.98
  -5   9  -8   33.43    2.07
   5  -9   8   28.36    1.95
   5   9   8   33.14    2.02
  -5  -9  -9    0.16    0.51
  -5   9  -9    0.35    0.63
   5  -9   9    0.41    0.61
   5   9   9    0.25    0.56
  -5  -9 -10   27.86    1.89
  -5   9 -10   26.21    1.97
   5  -9  10   23.80    1.96
   5   9  10   25.44    1.96
  -5  -9 -11    0.50    0.64
  -5   9 -11    0.34    0.67
   5  -9  11    0.07    0.63
   5   9  11    0.27    0.57
  -5   9 -12   10.48    1.53
   5  -9  12    9.50    1.50
   5   9  12   10.29    1.49
  -5   9 -13    0.67    0.77
   5  -9  13    0.18    0.71
   5   9  13    0.03    0.65
  -5   9 -14   14.15    1.78
   5  -9  14   10.11    1.68
   5   9  14   13.38    1.78
   5  -9  15    0.43    0.82
   5   9  15    0.42    0.80
   5  -9  16    1.95    1.11
   5   9  16    2.84    1.15
   5  -9  17    0.20    0.91
   5   9  17    0.16    0.85
   5  -9  18    1.17    1.14
  -5 -10  19    4.24    1.37
  -5  10  19    5.62    1.58
  -5 -10  18    0.08    0.70
  -5  10  18   -0.35    0.90
  -5 -10  17    7.91    1.54
  -5  10  17    9.56    1.72
  -5 -10  16    0.35    0.65
  -5  10  16    0.45    0.87
  -5 -10  15    7.07    1.36
  -5  10  15    7.61    1.50
  -5 -10  14   -0.25    0.45
  -5  10  14    0.34    0.81
  -5 -10  13    9.34    1.37
  -5  10  13    9.03    1.44
  -5 -10  12    1.52    0.73
  -5  10  12    0.89    0.80
  -5 -10  11    7.24    1.13
  -5  10  11    7.03    1.27
  -5 -10  10    1.82    0.64
  -5  10  10    0.81    0.71
   5  10 -10    0.85    0.54
  -5 -10   9    1.60    0.57
  -5  10   9    0.43    0.65
   5  10  -9    0.50    0.48
  -5 -10   8    0.49    0.39
  -5  10   8    1.22    0.71
   5  10  -8    1.17    0.54
  -5 -10   7    1.69    0.52
  -5  10   7    2.02    0.51
  -5  10   7    1.56    0.71
   5  10  -7    1.25    0.53
  -5 -10   6    0.05    0.23
  -5  10   6   -0.02    0.31
  -5  10   6    0.17    0.50
   5  10  -6   -0.14    0.30
  -5 -10   5    0.57    0.35
  -5  10   5    0.57    0.38
  -5  10   5    0.69    0.52
   5  10  -5    0.65    0.44
  -5  10   4    1.22    0.44
  -5  10   4    1.30    0.55
   5  10  -4    0.48    0.36
  -5 -10   3   45.91    1.59
  -5  10   3   51.45    1.99
  -5  10   3   47.02    1.90
   5  10  -3   50.99    2.10
  -5 -10   2    3.86    0.50
  -5  10   2    4.56    0.76
  -5  10   2    3.97    0.68
   5  10  -2    5.53    0.83
  -5 -10   1   22.78    0.96
  -5  10   1   27.61    1.56
  -5  10   1   22.67    1.26
   5  10  -1   24.85    1.51
  -5  10   0    6.83    0.94
  -5  10   0    6.63    0.77
   5  10   0    7.45    0.90
  -5  10  -1   40.93    1.95
  -5  10  -1   39.03    1.42
   5  10   1   44.18    2.00
  -5  10  -2    9.86    1.11
   5  10   2   11.18    1.07
   5  10   2   10.52    1.04
  -5  10  -3   20.90    1.53
   5  10   3   20.22    1.44
   5  10   3   18.15    1.36
  -5  10  -4    8.46    1.13
   5  10   4    7.54    1.02
   5  10   4    7.35    1.00
  -5 -10  -5   25.26    1.64
  -5  10  -5   24.69    1.72
   5  10   5   26.18    1.68
   5  10   5   24.57    1.67
  -5 -10  -6    4.47    0.91
  -5 -10  -6    2.65    0.71
  -5  10  -6    2.50    0.83
   5 -10   6    3.71    0.89
   5  10   6    2.79    0.77
  -5 -10  -7   32.27    1.92
  -5 -10  -7   31.03    1.86
  -5  10  -7   33.58    2.07
   5 -10   7   28.58    1.92
   5  10   7   31.45    1.99
  -5 -10  -8    0.16    0.56
  -5 -10  -8    0.22    0.48
  -5  10  -8    0.76    0.65
   5 -10   8    1.11    0.72
   5  10   8    0.06    0.51
  -5 -10  -9    3.27    0.90
  -5  10  -9    4.04    1.04
   5 -10   9    2.74    0.93
   5  10   9    1.96    0.81
  -5 -10 -10    1.72    0.74
  -5  10 -10    1.67    0.83
   5 -10  10    1.12    0.76
   5  10  10    0.91    0.69
  -5 -10 -11    0.80    0.73
  -5  10 -11    0.99    0.79
   5 -10  11    0.58    0.69
   5  10  11    1.68    0.84
  -5  10 -12    2.68    1.01
   5 -10  12    1.51    0.91
   5  10  12    1.93    0.92
  -5  10 -13    1.08    0.85
   5 -10  13    0.79    0.85
   5  10  13    1.10    0.84
  -5  10 -14    1.86    0.96
   5 -10  14    1.88    1.02
   5  10  14    2.23    0.97
   5 -10  15    0.94    0.98
   5  10  15    1.09    0.89
   5 -10  16    3.37    1.31
   5  10  16    2.39    1.17
   5 -10  17   -0.54    0.86
   5  10  17   -0.22    0.74
  -5 -11  18    1.53    0.94
  -5  11  18    1.27    1.15
  -5 -11  17    2.58    1.08
  -5  11  17    2.41    1.18
  -5 -11  16    0.31    0.69
  -5  11  16    1.28    0.96
  -5 -11  15    0.98    0.76
  -5  11  15    1.43    1.01
  -5 -11  14    1.39    0.75
  -5  11  14    0.60    0.86
  -5 -11  13    7.50    1.29
  -5  11  13    7.94    1.46
  -5 -11  12    0.08    0.50
  -5  11  12    0.16    0.72
  -5 -11  11   23.30    1.82
  -5  11  11   20.23    1.90
  -5 -11  10    0.17    0.44
  -5  11  10   -0.03    0.66
   5  11 -10    0.03    0.47
  -5 -11   9    8.02    1.08
  -5  11   9    7.74    1.25
   5  11  -9    9.45    1.17
  -5 -11   8    0.37    0.36
  -5  11   8   -0.11    0.55
   5  11  -8    0.21    0.46
  -5 -11   7   43.04    2.00
  -5  11   7   51.38    1.95
  -5  11   7   38.86    2.14
   5  11  -7   50.65    2.24
  -5 -11   6    1.91    0.53
  -5  11   6    3.13    0.64
  -5  11   6    2.20    0.73
   5  11  -6    2.98    0.71
  -5 -11   5   29.48    1.50
  -5  11   5   34.31    1.67
  -5  11   5   30.87    1.78
   5  11  -5   33.21    1.81
  -5 -11   4    2.39    0.50
  -5  11   4    2.60    0.63
  -5  11   4    1.92    0.65
   5  11  -4    2.62    0.67
  -5 -11   3   41.41    1.54
  -5  11   3   48.82    2.04
  -5  11   3   39.54    1.81
   5  11  -3   46.22    2.11
  -5 -11   2   13.86    0.86
  -5  11   2   15.16    1.23
  -5  11   2   13.44    1.09
   5  11  -2   15.06    1.28
  -5  11   1   32.91    1.76
  -5  11   1   31.61    1.50
   5  11  -1   34.86    1.86
  -5  11   0   14.71    1.27
  -5  11   0   12.55    0.96
   5  11   0   15.58    1.29
  -5  11  -1   27.87    1.72
   5  11   1   28.66    1.71
  -5  11  -2   18.54    1.48
   5  11   2   19.52    1.46
   5  11   2   18.60    1.37
  -5  11  -3    5.40    0.96
   5  11   3    3.77    0.81
   5  11   3    2.95    0.72
   5  11   4   21.80    1.57
  -5  11  -5    3.17    0.89
   5  11   5    4.22    0.87
   5  11   5    3.23    0.81
  -5 -11  -6   13.22    1.34
  -5 -11  -6   12.06    1.24
  -5  11  -6   12.00    1.38
   5 -11   6   12.83    1.39
   5  11   6   11.46    1.29
  -5 -11  -7    0.44    0.53
  -5 -11  -7    0.16    0.47
  -5  11  -7    0.57    0.64
   5 -11   7    0.45    0.65
   5  11   7    0.48    0.58
  -5 -11  -8    3.40    0.89
  -5 -11  -8    3.30    0.84
  -5  11  -8    4.00    1.02
   5 -11   8    3.28    0.97
   5  11   8    2.75    0.86
  -5 -11  -9    2.07    0.81
  -5 -11  -9    2.10    0.75
  -5  11  -9    2.03    0.86
   5 -11   9    1.32    0.77
   5  11   9    1.83    0.83
   5 -11  10    5.81    1.19
   5  11  10    4.45    1.11
  -5 -11 -11    0.80    0.71
  -5  11 -11    0.53    0.77
   5 -11  11    0.44    0.74
   5  11  11    0.20    0.57
  -5  11 -12    2.25    0.99
   5 -11  12    2.02    0.94
   5  11  12    2.51    1.03
  -5  11 -13    0.91    0.90
   5 -11  13    1.03    0.87
   5  11  13    0.32    0.70
  -5  11 -14    2.21    1.01
   5 -11  14    0.78    0.90
   5  11  14    1.42    0.93
   5 -11  15    0.15    0.86
   5  11  15    0.97    0.88
   5 -11  16   -0.25    0.90
   5  11  16    1.60    1.06
   5 -11  17   -0.60    0.89
   5  11  17    0.48    0.98
  -5 -12  18    0.89    0.90
  -5  12  18    0.98    1.09
  -5 -12  17   -0.23    0.67
  -5  12  17   -0.05    0.83
  -5 -12  16    1.95    0.95
  -5  12  16    2.85    1.22
  -5 -12  15    0.61    0.72
  -5  12  15    0.44    0.85
  -5 -12  14    1.84    0.87
  -5  12  14    2.94    1.16
  -5 -12  13    0.86    0.69
  -5  12  13    0.76    0.88
  -5 -12  12    1.50    0.77
  -5  12  12    1.48    0.88
  -5 -12  11    0.19    0.53
  -5  12  11    0.52    0.68
  -5 -12  10    0.82    0.54
  -5  12  10    1.14    0.81
   5  12 -10    1.22    0.64
  -5 -12   9    7.47    1.07
  -5  12   9    7.46    1.22
   5  12  -9   10.48    1.22
  -5 -12   8    0.77    0.46
  -5  12   8    0.47    0.67
   5  12  -8    0.76    0.57
  -5 -12   7    4.12    0.76
  -5  12   7    6.06    0.86
  -5  12   7    4.28    0.97
   5  12  -7    4.98    0.92
  -5 -12   6    4.22    0.73
  -5  12   6    5.18    0.82
  -5  12   6    3.56    0.89
   5  12  -6    4.18    0.87
  -5 -12   5    8.55    0.88
  -5  12   5   10.46    1.05
  -5  12   5    9.18    1.13
   5  12  -5    8.73    1.13
  -5 -12   4   22.04    1.26
  -5  12   4   24.77    1.53
  -5  12   4   19.39    1.45
  -5  12   3   40.30    1.93
  -5  12   3   36.55    1.83
   5  12  -3   37.71    2.00
  -5  12   2   10.19    1.11
  -5  12   2    9.30    1.03
   5  12  -2    9.79    1.12
  -5  12   1   45.01    2.13
  -5  12   1   35.02    1.61
   5  12  -1   41.70    2.11
  -5  12   0   20.98    1.54
  -5  12   0   18.65    1.17
   5  12   0   18.68    1.47
  -5  12  -1   27.74    1.79
   5  12   1   24.42    1.65
  -5  12  -2   14.74    1.40
   5  12   2   13.58    1.28
   5  12   2   15.03    1.29
[truncated: 420,804 more chars]
