# Supplementary material
Source: MDPI journal article supplement (https://www.mdpi.com/2073-4352/8/6/236)
Supplement: s1 [file s1 › 3.cif]

data_sun-16
_audit_creation_date              2018-05-02
_audit_creation_method
;
Olex2 1.2
(compiled 2013.09.17 svn.r2790 for OlexSys, GUI svn.r4601)
;
_shelxl_version_number            2013-2
_publ_contact_author_address      ?
_publ_contact_author_email        ?
_publ_contact_author_name         ''
_publ_contact_author_phone        ?
_chemical_name_common             ?
_chemical_name_systematic
;
 ?
;
_chemical_formula_moiety          'C28 H29 N7 O11 Zn2, C3 H7 N O, H O, H2 O'
_chemical_formula_sum             'C31 H40 N8 O14 Zn2'
_chemical_formula_weight          879.45
_chemical_melting_point           ?
loop_
  _atom_type_symbol
  _atom_type_description
  _atom_type_scat_dispersion_real
  _atom_type_scat_dispersion_imag
  _atom_type_scat_source
 'C' 'C' 0.0033 0.0016 'International Tables Vol C Tables 4.2.6.8 and 6.1.1.4'
 'H' 'H' 0.0000 0.0000 'International Tables Vol C Tables 4.2.6.8 and 6.1.1.4'
 'N' 'N' 0.0061 0.0033 'International Tables Vol C Tables 4.2.6.8 and 6.1.1.4'
 'O' 'O' 0.0106 0.0060 'International Tables Vol C Tables 4.2.6.8 and 6.1.1.4'
 'Zn' 'Zn' 0.2839 1.4301 'International Tables Vol C Tables 4.2.6.8 and 6.1.1.4'

_shelx_space_group_comment
;
The symmetry employed for this shelxl refinement is uniquely defined
by the following loop, which should always be used as a source of
symmetry information in preference to the above space-group names.
They are only intended as comments.
;
_space_group_crystal_system       'triclinic'
_space_group_IT_number            2
_space_group_name_H-M_alt         'P -1'
_space_group_name_Hall            '-P 1'
loop_
  _space_group_symop_operation_xyz
 'x, y, z'
 '-x, -y, -z'

_cell_length_a                    9.3223(5)
_cell_length_b                    13.1795(5)
_cell_length_c                    16.5396(10)
_cell_angle_alpha                 92.650(4)
_cell_angle_beta                  105.391(5)
_cell_angle_gamma                 102.938(4)
_cell_volume                      1897.38(18)
_cell_formula_units_Z             2
_cell_measurement_reflns_used     6669
_cell_measurement_temperature     293(2)
_cell_measurement_theta_max       24.998
_cell_measurement_theta_min       2.327
_shelx_estimated_absorpt_T_max    ?
_shelx_estimated_absorpt_T_min    ?
_exptl_absorpt_coefficient_mu     1.340
_exptl_absorpt_correction_T_max   ?
_exptl_absorpt_correction_T_min   ?
_exptl_absorpt_correction_type    ?
_exptl_absorpt_process_details    ?
_exptl_crystal_colour             'colourless'
_exptl_crystal_density_diffrn     1.539
_exptl_crystal_density_meas       none
_exptl_crystal_density_method     'not measured'
_exptl_crystal_description        block
_exptl_crystal_F_000              908
_exptl_crystal_size_max           0.32
_exptl_crystal_size_mid           0.25
_exptl_crystal_size_min           0.24
_exptl_special_details
;
 ?
;
_exptl_transmission_factor_max    ?
_exptl_transmission_factor_min    ?
_diffrn_reflns_av_R_equivalents   0.0366
_diffrn_reflns_av_unetI/netI      0.0662
_diffrn_reflns_Laue_measured_fraction_full 0.971
_diffrn_reflns_Laue_measured_fraction_max 0.999
_diffrn_reflns_limit_h_max        11
_diffrn_reflns_limit_h_min        -11
_diffrn_reflns_limit_k_max        15
_diffrn_reflns_limit_k_min        -15
_diffrn_reflns_limit_l_max        19
_diffrn_reflns_limit_l_min        -19
_diffrn_reflns_number             13632
_diffrn_reflns_point_group_measured_fraction_full 0.971
_diffrn_reflns_point_group_measured_fraction_max 0.999
_diffrn_reflns_theta_full         25.242
_diffrn_reflns_theta_max          24.998
_diffrn_reflns_theta_min          2.327
_diffrn_ambient_temperature       293(2)
_diffrn_detector_area_resol_mean  '9.00cm'
_diffrn_measured_fraction_theta_full 0.971
_diffrn_measured_fraction_theta_max 0.999
_diffrn_measurement_device_type   'CCD area detector'
_diffrn_measurement_method        'phi and omega scans'
_diffrn_radiation_type            MoK\a
_diffrn_radiation_wavelength      0.71073
_diffrn_source                    'fine-focus sealed tube'
_reflns_Friedel_coverage          0.000
_reflns_Friedel_fraction_full     .
_reflns_Friedel_fraction_max      .
_reflns_number_gt                 4816
_reflns_number_total              6669
_reflns_special_details
;
 Reflections were merged by SHELXL according to the crystal
 class for the calculation of statistics and refinement.
 
 _reflns_Friedel_fraction is defined as the number of unique
 Friedel pairs measured divided by the number that would be
 possible theoretically, ignoring centric projections and
 systematic absences.
;
_reflns_threshold_expression      'I > 2\s(I)'
_computing_cell_refinement        ?
_computing_data_collection        ?
_computing_data_reduction         ?
_computing_molecular_graphics
;
O. V. Dolomanov, L. J. Bourhis, R. J. Gildea, J. A. K. Howard and H. Puschmann,
OLEX2: a complete structure solution, refinement and analysis program.
J. Appl. Cryst. (2009). 42, 339-341.
;
_computing_publication_material
;
O. V. Dolomanov, L. J. Bourhis, R. J. Gildea, J. A. K. Howard and H. Puschmann,
OLEX2: a complete structure solution, refinement and analysis program.
J. Appl. Cryst. (2009). 42, 339-341.
;
_computing_structure_refinement
;
SHELX, G.M. Sheldrick, Acta Cryst.
(2008). A64, 112-122
;
_computing_structure_solution
'SUPERFLIP, J. Appl. Cryst. (2007) 40, 786-790'
_refine_diff_density_max          0.369
_refine_diff_density_min          -0.498
_refine_diff_density_rms          0.070
_refine_ls_extinction_coef        .
_refine_ls_extinction_method      none
_refine_ls_goodness_of_fit_ref    1.026
_refine_ls_hydrogen_treatment     mixed
_refine_ls_matrix_type            full
_refine_ls_number_parameters      509
_refine_ls_number_reflns          6669
_refine_ls_number_restraints      0
_refine_ls_R_factor_all           0.0700
_refine_ls_R_factor_gt            0.0432
_refine_ls_restrained_S_all       1.026
_refine_ls_shift/su_max           0.002
_refine_ls_shift/su_mean          0.000
_refine_ls_structure_factor_coef  Fsqd
_refine_ls_weighting_details
;
 w=1/[\s^2^(Fo^2^)+(0.0340P)^2^+0.4150P]
 where P=(Fo^2^+2Fc^2^)/3
;
_refine_ls_weighting_scheme       calc
_refine_ls_wR_factor_gt           0.0839
_refine_ls_wR_factor_ref          0.0956
_refine_special_details
;
 ?
;
_olex2_refinement_description
;
1. Others
 Fixed Uiso: H3A(0.039) H3B(0.039) H15(0.047) H10A(0.051) H10B(0.051)
 H19(0.081) H24(0.05) H7A(0.04) H7B(0.04) H2A(0.044) H2B(0.044) H13(0.065)
 H18(0.07) H16A(0.063) H16B(0.063) H14(0.068) H26(0.038) H11A(0.061)
 H11B(0.061) H25(0.05) H8A(0.045) H8B(0.045) H23A(0.044) H23B(0.044) H21(0.06)
 H28A(0.16) H28B(0.16) H28C(0.16) H20(0.076) H29A(0.156) H29B(0.156)
 H29C(0.156) H31(0.099) H13A(0.229) H30A(0.133) H30B(0.133) H30C(0.133)
 H14A(0.195)
 Fixed X: H3A(0.966) H3B(0.9864) H15(1.3) H10A(0.7016) H10B(0.5753)
 H19(0.8251) H24(0.9933) H7A(0.5143) H7B(0.4168) H2A(0.7751) H2B(0.7708)
 H13(0.9351) H18(0.9398) H16A(1.1415) H16B(1.28) H14(0.9195) H26(0.5847)
 H11A(0.3996) H11B(0.5257) H25(0.9866) H8A(0.6043) H8B(0.7037) H23A(1.3089)
 H23B(1.3655) H21(1.1122) H28A(1.4026) H28B(1.3797) H28C(1.2377) H20(0.9133)
 H29A(0.7804) H29B(0.9046) H29C(0.754) H31(0.5582) H13A(0.65) H30A(0.7927)
 H30B(0.7318) H30C(0.8937) H14A(0.7256)
 Fixed Y: H3A(0.4192) H3B(0.3052) H15(0.0736) H10A(0.0885) H10B(0.1255) H19(-
 0.2666) H24(0.4008) H7A(0.5024) H7B(0.427) H2A(0.3623) H2B(0.2449) H13(0.1498)
 H18(-0.1302) H16A(-0.1356) H16B(-0.0987) H14(-0.0296) H26(0.2323) H11A(0.0677)
 H11B(0.0303) H25(0.3829) H8A(0.4906) H8B(0.5644) H23A(-0.366) H23B(-0.2439)
 H21(-0.4313) H28A(0.5247) H28B(0.4231) H28C(0.4658) H20(-0.4159) H29A(1.0096)
 H29B(0.947) H29C(0.9254) H31(0.7427) H13A(0.9959) H30A(0.9381) H30B(0.8167)
 H30C(0.8627) H14A(0.7703)
 Fixed Z: H3A(0.5601) H3B(0.5469) H15(0.8289) H10A(0.2981) H10B(0.2312)
 H19(0.6313) H24(1.0782) H7A(0.387) H7B(0.305) H2A(0.6235) H2B(0.6004)
 H13(0.8607) H18(0.7385) H16A(0.9301) H16B(0.8929) H14(0.8936) H26(0.947)
 H11A(0.307) H11B(0.3733) H25(0.9296) H8A(0.2379) H8B(0.3197) H23A(0.8697)
 H23B(0.8922) H21(0.7477) H28A(1.0495) H28B(1.0951) H28C(1.0511) H20(0.6358)
 H29A(0.5322) H29B(0.5656) H29C(0.5941) H31(0.431) H13A(0.9409) H30A(0.3885)
 H30B(0.3639) H30C(0.4283) H14A(0.8667)
;
_atom_sites_solution_hydrogens    mixed
_atom_sites_solution_primary      iterative
_atom_sites_solution_secondary    ?
loop_
  _atom_site_label
  _atom_site_type_symbol
  _atom_site_fract_x
  _atom_site_fract_y
  _atom_site_fract_z
  _atom_site_U_iso_or_equiv
  _atom_site_adp_type
  _atom_site_occupancy
  _atom_site_site_symmetry_order
  _atom_site_calc_flag
  _atom_site_refinement_flags_posn
  _atom_site_refinement_flags_adp
  _atom_site_refinement_flags_occupancy
  _atom_site_disorder_assembly
  _atom_site_disorder_group
 Zn1 Zn 1.21956(5) 0.29657(3) 0.81576(3) 0.03076(13) Uani 1 1 d . . . . .
 Zn2 Zn 0.69512(5) 0.27005(3) 0.78087(2) 0.02842(12) Uani 1 1 d . . . . .
 O2 O 0.9079(3) 0.31137(18) 0.76733(15) 0.0335(6) Uani 1 1 d . . . . .
 O3 O 1.4165(3) 0.31305(17) 0.78491(15) 0.0328(6) Uani 1 1 d . . . . .
 O7 O 0.7477(3) 0.48686(19) 0.48684(16) 0.0502(8) Uani 1 1 d . . . . .
 O1 O 1.0872(3) 0.31746(19) 0.70370(15) 0.0370(6) Uani 1 1 d . . . . .
 N6 N 0.6070(3) 0.3827(2) 0.36609(17) 0.0293(7) Uani 1 1 d . . . . .
 O5 O 0.6224(3) 0.14216(19) 0.70502(18) 0.0547(8) Uani 1 1 d . . . . .
 N4 N 0.7630(3) 0.2967(2) 0.90562(18) 0.0298(7) Uani 1 1 d . . . . .
 N5 N 0.7974(3) 0.3285(2) 0.46520(17) 0.0290(7) Uani 1 1 d . . . . .
 C3 C 0.9120(4) 0.3458(3) 0.5481(2) 0.0329(9) Uani 1 1 d . . . . .
 H3A H 0.9660 0.4192 0.5601 0.039 Uiso 1 1 calc R U . . .
 H3B H 0.9864 0.3052 0.5469 0.039 Uiso 1 1 calc R U . . .
 O10 O 1.2453(3) 0.4172(2) 0.89746(19) 0.0529(8) Uani 1 1 d . . . . .
 C5 C 0.5699(5) 0.2903(3) 0.3139(2) 0.0368(9) Uani 1 1 d . . . . .
 O9 O 0.8251(3) 0.1636(2) 0.44415(18) 0.0529(8) Uani 1 1 d . . . . .
 O4 O 0.6023(3) 0.38110(18) 0.73003(15) 0.0372(6) Uani 1 1 d . . . . .
 O8 O 0.4723(3) 0.2749(2) 0.24652(17) 0.0562(8) Uani 1 1 d . . . . .
 C15 C 1.2070(4) 0.0708(3) 0.8405(2) 0.0394(10) Uani 1 1 d . . . . .
 H15 H 1.3000 0.0736 0.8289 0.047 Uiso 1 1 calc R U . . .
 C1 C 0.9500(4) 0.3151(2) 0.7013(2) 0.0280(8) Uani 1 1 d . . . . .
 N1 N 1.1385(4) 0.1489(2) 0.8347(2) 0.0393(8) Uani 1 1 d . . . . .
 N7 N 0.6529(4) 0.2183(2) 0.34192(18) 0.0337(7) Uani 1 1 d . . . . .
 C10 C 0.6113(5) 0.1161(3) 0.2903(2) 0.0423(10) Uani 1 1 d . . . . .
 H10A H 0.7016 0.0885 0.2981 0.051 Uiso 1 1 calc R U . . .
 H10B H 0.5753 0.1255 0.2312 0.051 Uiso 1 1 calc R U . . .
 N3 N 0.7700(3) 0.3121(2) 1.03883(17) 0.0295(7) Uani 1 1 d . . . . .
 C22 C 1.1501(4) -0.2893(3) 0.8110(2) 0.0355(9) Uani 1 1 d . . . . .
 O11 O 1.3650(4) 0.3151(3) 0.9776(2) 0.0846(11) Uani 1 1 d . . . . .
 C19 C 0.9065(6) -0.2725(4) 0.6761(3) 0.0674(14) Uani 1 1 d . . . . .
 H19 H 0.8251 -0.2666 0.6313 0.081 Uiso 1 1 calc R U . . .
 C24 C 0.9105(4) 0.3649(3) 1.0336(2) 0.0417(10) Uani 1 1 d . . . . .
 H24 H 0.9933 0.4008 1.0782 0.050 Uiso 1 1 calc R U . . .
 C7 C 0.5204(4) 0.4616(3) 0.3383(2) 0.0335(9) Uani 1 1 d . . . . .
 H7A H 0.5143 0.5024 0.3870 0.040 Uiso 1 1 calc R U . . .
 H7B H 0.4168 0.4270 0.3050 0.040 Uiso 1 1 calc R U . . .
 C2 C 0.8381(4) 0.3146(3) 0.6173(2) 0.0367(9) Uani 1 1 d . . . . .
 H2A H 0.7751 0.3623 0.6235 0.044 Uiso 1 1 calc R U . . .
 H2B H 0.7708 0.2449 0.6004 0.044 Uiso 1 1 calc R U . . .
 C13 C 1.0069(5) 0.1118(3) 0.8581(3) 0.0546(12) Uani 1 1 d . . . . .
 H13 H 0.9351 0.1498 0.8607 0.065 Uiso 1 1 calc R U . . .
 C18 C 0.9754(5) -0.1908(3) 0.7406(3) 0.0582(13) Uani 1 1 d . . . . .
 H18 H 0.9398 -0.1302 0.7385 0.070 Uiso 1 1 calc R U . . .
 C16 C 1.1693(5) -0.1116(3) 0.8805(3) 0.0528(12) Uani 1 1 d . . . . .
 H16A H 1.1415 -0.1356 0.9301 0.063 Uiso 1 1 calc R U . . .
 H16B H 1.2800 -0.0987 0.8929 0.063 Uiso 1 1 calc R U . . .
 C14 C 0.9974(5) 0.0130(3) 0.8765(3) 0.0566(12) Uani 1 1 d . . . . .
 H14 H 0.9195 -0.0296 0.8936 0.068 Uiso 1 1 calc R U . . .
 C26 C 0.6855(4) 0.2722(3) 0.9607(2) 0.0316(8) Uani 1 1 d . . . . .
 H26 H 0.5847 0.2323 0.9470 0.038 Uiso 1 1 calc R U . . .
 C11 C 0.4890(5) 0.0393(3) 0.3141(3) 0.0507(12) Uani 1 1 d . . . . .
 H11A H 0.3996 0.0677 0.3070 0.061 Uiso 1 1 calc R U . . .
 H11B H 0.5257 0.0303 0.3733 0.061 Uiso 1 1 calc R U . . .
 N2 N 1.1257(4) -0.0122(2) 0.8650(2) 0.0423(8) Uani 1 1 d . . . . .
 C6 C 0.7616(4) 0.2310(3) 0.4192(2) 0.0354(9) Uani 1 1 d . . . . .
 O6 O 0.5336(4) 0.0760(2) 0.8064(2) 0.0631(9) Uani 1 1 d . . . . .
 C9 C 1.4765(4) 0.3814(3) 0.7451(2) 0.0273(8) Uani 1 1 d . . . . .
 C17 C 1.0960(5) -0.1984(3) 0.8078(2) 0.0394(10) Uani 1 1 d . . . . .
 C27 C 1.3166(5) 0.3941(4) 0.9702(3) 0.0579(14) Uani 1 1 d . . . . .
 C4 C 0.7184(4) 0.4045(3) 0.4429(2) 0.0307(8) Uani 1 1 d . . . . .
 C12 C 0.5582(4) 0.0664(3) 0.7373(3) 0.0404(10) Uani 1 1 d . . . . .
 C25 C 0.9061(4) 0.3549(3) 0.9517(2) 0.0417(10) Uani 1 1 d . . . . .
 H25 H 0.9866 0.3829 0.9296 0.050 Uiso 1 1 calc R U . . .
 C8 C 0.5992(4) 0.5327(3) 0.2862(2) 0.0372(9) Uani 1 1 d . . . . .
 H8A H 0.6043 0.4906 0.2379 0.045 Uiso 1 1 calc R U . . .
 H8B H 0.7037 0.5644 0.3197 0.045 Uiso 1 1 calc R U . . .
 C23 C 1.2778(4) -0.3033(3) 0.8833(2) 0.0365(9) Uani 1 1 d . . . . .
 H23A H 1.3089 -0.3660 0.8697 0.044 Uiso 1 1 calc R U . . .
 H23B H 1.3655 -0.2439 0.8922 0.044 Uiso 1 1 calc R U . . .
 N8 N 0.7222(4) 0.8636(3) 0.4771(2) 0.0562(10) Uani 1 1 d . . . . .
 O12 O 0.5368(5) 0.7843(3) 0.5337(3) 0.1057(15) Uani 1 1 d . . . . .
 C21 C 1.0785(5) -0.3699(3) 0.7460(3) 0.0498(11) Uani 1 1 d . . . . .
 H21 H 1.1122 -0.4313 0.7477 0.060 Uiso 1 1 calc R U . . .
 C28 C 1.3358(7) 0.4572(5) 1.0480(4) 0.107(2) Uani 1 1 d . . . . .
 H28A H 1.4026 0.5247 1.0495 0.160 Uiso 1 1 calc R U . . .
 H28B H 1.3797 0.4231 1.0951 0.160 Uiso 1 1 calc R U . . .
 H28C H 1.2377 0.4658 1.0511 0.160 Uiso 1 1 calc R U . . .
 C20 C 0.9586(6) -0.3611(4) 0.6790(3) 0.0634(14) Uani 1 1 d . . . . .
 H20 H 0.9133 -0.4159 0.6358 0.076 Uiso 1 1 calc R U . . .
 C29 C 0.7965(8) 0.9431(4) 0.5482(4) 0.104(2) Uani 1 1 d . . . . .
 H29A H 0.7804 1.0096 0.5322 0.156 Uiso 1 1 calc R U . . .
 H29B H 0.9046 0.9470 0.5656 0.156 Uiso 1 1 calc R U . . .
 H29C H 0.7540 0.9254 0.5941 0.156 Uiso 1 1 calc R U . . .
 C31 C 0.6008(7) 0.7926(5) 0.4780(4) 0.0822(17) Uani 1 1 d . . . . .
 H31 H 0.5582 0.7427 0.4310 0.099 Uiso 1 1 calc R U . . .
 O13 O 0.5727(7) 0.9521(5) 0.9472(4) 0.153(2) Uani 1 1 d G . . . .
 H13A H 0.6500 0.9959 0.9409 0.229 Uiso 1 1 d G U . . .
 C30 C 0.7908(6) 0.8709(4) 0.4088(3) 0.0884(18) Uani 1 1 d . . . . .
 H30A H 0.7927 0.9381 0.3885 0.133 Uiso 1 1 calc R U . . .
 H30B H 0.7318 0.8167 0.3639 0.133 Uiso 1 1 calc R U . . .
 H30C H 0.8937 0.8627 0.4283 0.133 Uiso 1 1 calc R U . . .
 O14 O 0.7519(8) 0.8125(5) 0.9115(3) 0.130(2) Uani 1 1 d G . . . .
 H14A H 0.7256 0.7703 0.8667 0.195 Uiso 1 1 d G U . . .
 H14B H 0.673(11) 0.840(8) 0.924(6) 0.22(6) Uiso 1 1 d . . . . .

loop_
  _atom_site_aniso_label
  _atom_site_aniso_U_11
  _atom_site_aniso_U_22
  _atom_site_aniso_U_33
  _atom_site_aniso_U_23
  _atom_site_aniso_U_13
  _atom_site_aniso_U_12
 Zn1 0.0284(3) 0.0326(2) 0.0306(3) 0.00948(18) 0.0064(2) 0.00738(19)
 Zn2 0.0289(3) 0.0299(2) 0.0277(2) 0.00676(18) 0.00704(19) 0.01016(18)
 O2 0.0243(14) 0.0521(16) 0.0262(14) 0.0079(12) 0.0068(11) 0.0132(12)
 O3 0.0286(14) 0.0335(13) 0.0399(15) 0.0175(12) 0.0098(12) 0.0122(11)
 O7 0.067(2) 0.0302(14) 0.0417(16) -0.0060(13) -0.0032(15) 0.0129(14)
 O1 0.0233(14) 0.0574(16) 0.0314(15) 0.0156(12) 0.0062(12) 0.0122(12)
 N6 0.0375(19) 0.0220(14) 0.0242(16) 0.0078(12) 0.0007(14) 0.0074(13)
 O5 0.071(2) 0.0305(15) 0.0560(19) 0.0005(14) 0.0227(17) -0.0057(14)
 N4 0.0310(18) 0.0303(16) 0.0276(17) 0.0055(13) 0.0085(15) 0.0061(14)
 N5 0.0340(18) 0.0291(15) 0.0226(16) 0.0076(13) 0.0043(14) 0.0085(14)
 C3 0.028(2) 0.043(2) 0.023(2) 0.0076(16) 0.0017(16) 0.0043(17)
 O10 0.0414(18) 0.0604(18) 0.049(2) -0.0079(15) 0.0018(16) 0.0132(14)
 C5 0.045(3) 0.032(2) 0.029(2) 0.0096(17) 0.007(2) 0.0032(18)
 O9 0.068(2) 0.0399(15) 0.0537(19) 0.0134(14) 0.0073(16) 0.0298(15)
 O4 0.0340(16) 0.0439(15) 0.0446(16) 0.0193(12) 0.0184(13) 0.0203(12)
 O8 0.068(2) 0.0480(17) 0.0335(17) 0.0002(13) -0.0157(16) 0.0117(15)
 C15 0.036(2) 0.040(2) 0.041(2) 0.0073(19) 0.0063(19) 0.0123(19)
 C1 0.024(2) 0.0258(18) 0.033(2) 0.0081(16) 0.0054(17) 0.0054(15)
 N1 0.036(2) 0.0318(17) 0.052(2) 0.0139(15) 0.0145(17) 0.0086(15)
 N7 0.050(2) 0.0230(15) 0.0257(17) 0.0022(13) 0.0082(16) 0.0067(14)
 C10 0.057(3) 0.029(2) 0.038(2) -0.0044(17) 0.017(2) 0.0015(19)
 N3 0.0336(18) 0.0277(15) 0.0264(17) 0.0062(13) 0.0065(14) 0.0078(14)
 C22 0.043(2) 0.037(2) 0.027(2) 0.0065(17) 0.0121(19) 0.0092(18)
 O11 0.089(3) 0.103(3) 0.072(3) 0.025(2) 0.029(2) 0.033(2)
 C19 0.069(4) 0.078(3) 0.040(3) 0.012(3) -0.008(2) 0.015(3)
 C24 0.031(2) 0.047(2) 0.034(2) 0.0019(19) 0.0043(19) -0.0105(18)
 C7 0.032(2) 0.0324(19) 0.038(2) 0.0137(17) 0.0071(18) 0.0125(17)
 C2 0.028(2) 0.050(2) 0.030(2) 0.0095(18) 0.0063(18) 0.0071(18)
 C13 0.045(3) 0.044(2) 0.084(4) 0.023(2) 0.026(3) 0.016(2)
 C18 0.069(3) 0.051(3) 0.047(3) 0.007(2) -0.001(2) 0.021(2)
 C16 0.078(3) 0.031(2) 0.042(3) 0.0052(19) -0.003(2) 0.023(2)
 C14 0.050(3) 0.045(3) 0.082(4) 0.024(2) 0.030(3) 0.010(2)
 C26 0.028(2) 0.032(2) 0.034(2) 0.0067(17) 0.0065(18) 0.0094(16)
 C11 0.063(3) 0.030(2) 0.058(3) -0.006(2) 0.028(2) -0.001(2)
 N2 0.052(2) 0.0290(17) 0.047(2) 0.0130(15) 0.0101(18) 0.0149(16)
 C6 0.042(2) 0.031(2) 0.035(2) 0.0095(17) 0.013(2) 0.0100(18)
 O6 0.080(2) 0.0460(17) 0.062(2) -0.0115(16) 0.0354(19) -0.0012(16)
 C9 0.026(2) 0.0281(19) 0.026(2) 0.0067(16) 0.0021(17) 0.0080(16)
 C17 0.046(3) 0.037(2) 0.031(2) 0.0073(18) 0.006(2) 0.0070(19)
 C27 0.032(3) 0.076(3) 0.056(3) -0.029(3) 0.017(2) -0.003(2)
 C4 0.035(2) 0.029(2) 0.026(2) 0.0114(17) 0.0068(18) 0.0048(17)
 C12 0.038(2) 0.030(2) 0.051(3) 0.001(2) 0.010(2) 0.0081(18)
 C25 0.034(2) 0.052(2) 0.034(2) 0.0044(19) 0.0101(19) -0.0006(19)
 C8 0.036(2) 0.039(2) 0.047(2) 0.0230(18) 0.0169(19) 0.0192(18)
 C23 0.047(3) 0.041(2) 0.029(2) 0.0078(17) 0.0169(19) 0.0174(19)
 N8 0.050(2) 0.068(3) 0.046(2) 0.0097(19) 0.014(2) 0.006(2)
 O12 0.096(3) 0.133(4) 0.081(3) 0.013(3) 0.049(3) -0.012(3)
 C21 0.066(3) 0.042(2) 0.039(3) -0.003(2) 0.018(2) 0.007(2)
 C28 0.100(5) 0.101(5) 0.111(5) -0.014(4) 0.020(4) 0.025(4)
 C20 0.072(4) 0.063(3) 0.037(3) -0.012(2) 0.005(3) -0.003(3)
 C29 0.136(6) 0.079(4) 0.077(4) 0.003(3) 0.030(4) -0.011(4)
 C31 0.067(4) 0.096(4) 0.064(4) -0.003(3) 0.003(3) 0.003(3)
 O13 0.144(5) 0.183(6) 0.106(4) 0.003(4) 0.013(4) 0.020(4)
 C30 0.076(4) 0.107(4) 0.088(4) 0.001(3) 0.045(4) 0.009(3)
 O14 0.142(5) 0.117(4) 0.077(3) 0.022(3) -0.003(3) -0.041(4)

_geom_special_details
;
 All esds (except the esd in the dihedral angle between two l.s. planes)
 are estimated using the full covariance matrix.  The cell esds are taken
 into account individually in the estimation of esds in distances, angles
 and torsion angles; correlations between esds in cell parameters are only
 used when they are defined by crystal symmetry.  An approximate (isotropic)
 treatment of cell esds is used for estimating esds involving l.s. planes.
;
loop_
  _geom_bond_atom_site_label_1
  _geom_bond_atom_site_label_2
  _geom_bond_distance
  _geom_bond_site_symmetry_2
  _geom_bond_publ_flag
 Zn1 O3 2.002(2) . ?
 Zn1 O1 2.005(2) . ?
 Zn1 O10 1.967(3) . ?
 Zn1 N1 1.996(3) . ?
 Zn2 O2 2.011(2) . ?
 Zn2 O5 1.928(2) . ?
 Zn2 N4 1.980(3) . ?
 Zn2 O4 1.973(2) . ?
 O2 C1 1.255(4) . ?
 O3 C9 1.257(4) . ?
 O7 C4 1.213(4) . ?
 O1 C1 1.262(4) . ?
 N6 C5 1.379(4) . ?
 N6 C7 1.472(4) . ?
 N6 C4 1.381(4) . ?
 O5 C12 1.262(5) . ?
 N4 C26 1.315(4) . ?
 N4 C25 1.377(4) . ?
 N5 C3 1.469(4) . ?
 N5 C6 1.387(4) . ?
 N5 C4 1.379(4) . ?
 C3 C2 1.513(5) . ?
 O10 C27 1.297(6) . ?
 C5 O8 1.213(4) . ?
 C5 N7 1.376(5) . ?
 O9 C6 1.204(4) . ?
 O4 C9 1.263(4) 1_455 ?
 C15 N1 1.321(4) . ?
 C15 N2 1.329(5) . ?
 C1 C2 1.498(5) . ?
 N1 C13 1.376(5) . ?
 N7 C10 1.476(4) . ?
 N7 C6 1.380(5) . ?
 C10 C11 1.496(5) . ?
 N3 C24 1.366(4) . ?
 N3 C26 1.333(4) . ?
 N3 C23 1.472(4) 2_757 ?
 C22 C17 1.399(5) . ?
 C22 C23 1.498(5) . ?
 C22 C21 1.387(5) . ?
 O11 C27 1.223(6) . ?
 C19 C18 1.389(6) . ?
 C19 C20 1.360(6) . ?
 C24 C25 1.345(5) . ?
 C7 C8 1.504(5) . ?
 C13 C14 1.340(5) . ?
 C18 C17 1.380(5) . ?
 C16 N2 1.470(4) . ?
 C16 C17 1.519(5) . ?
 C14 N2 1.368(5) . ?
 C11 C12 1.507(5) 2_656 ?
 O6 C12 1.229(5) . ?
 C9 O4 1.264(4) 1_655 ?
 C9 C8 1.505(5) 2_766 ?
 C27 C28 1.447(6) . ?
 C12 C11 1.507(5) 2_656 ?
 C8 C9 1.505(4) 2_766 ?
 C23 N3 1.472(4) 2_757 ?
 N8 C29 1.445(6) . ?
 N8 C31 1.301(6) . ?
 N8 C30 1.436(6) . ?
 O12 C31 1.220(6) . ?
 C21 C20 1.380(6) . ?

loop_
  _geom_angle_atom_site_label_1
  _geom_angle_atom_site_label_2
  _geom_angle_atom_site_label_3
  _geom_angle
  _geom_angle_site_symmetry_1
  _geom_angle_site_symmetry_3
  _geom_angle_publ_flag
 O3 Zn1 O1 97.92(10) . . ?
 O10 Zn1 O3 107.29(11) . . ?
 O10 Zn1 O1 108.61(11) . . ?
 O10 Zn1 N1 122.86(13) . . ?
 N1 Zn1 O3 111.09(11) . . ?
 N1 Zn1 O1 106.19(12) . . ?
 O5 Zn2 O2 97.64(11) . . ?
 O5 Zn2 N4 132.00(12) . . ?
 O5 Zn2 O4 110.80(12) . . ?
 N4 Zn2 O2 94.98(11) . . ?
 O4 Zn2 O2 102.33(10) . . ?
 O4 Zn2 N4 111.30(10) . . ?
 C1 O2 Zn2 129.6(2) . . ?
 C9 O3 Zn1 129.0(2) . . ?
 C1 O1 Zn1 115.0(2) . . ?
 C5 N6 C7 117.6(3) . . ?
 C5 N6 C4 123.9(3) . . ?
 C4 N6 C7 118.5(3) . . ?
 C12 O5 Zn2 112.3(2) . . ?
 C26 N4 Zn2 129.9(3) . . ?
 C26 N4 C25 105.9(3) . . ?
 C25 N4 Zn2 124.1(2) . . ?
 C6 N5 C3 117.5(3) . . ?
 C4 N5 C3 118.1(3) . . ?
 C4 N5 C6 123.8(3) . . ?
 N5 C3 C2 111.5(3) . . ?
 C27 O10 Zn1 105.8(3) . . ?
 O8 C5 N6 121.7(3) . . ?
 O8 C5 N7 122.2(3) . . ?
 N7 C5 N6 116.1(3) . . ?
 C9 O4 Zn2 113.0(2) 1_455 . ?
 N1 C15 N2 111.3(3) . . ?
 O2 C1 O1 120.8(3) . . ?
 O2 C1 C2 120.8(3) . . ?
 O1 C1 C2 118.3(3) . . ?
 C15 N1 Zn1 128.6(3) . . ?
 C15 N1 C13 105.0(3) . . ?
 C13 N1 Zn1 125.7(2) . . ?
 C5 N7 C10 117.9(3) . . ?
 C5 N7 C6 124.3(3) . . ?
 C6 N7 C10 117.5(3) . . ?
 N7 C10 C11 111.4(3) . . ?
 C24 N3 C23 125.7(3) . 2_757 ?
 C26 N3 C24 107.2(3) . . ?
 C26 N3 C23 127.1(3) . 2_757 ?
 C17 C22 C23 122.1(3) . . ?
 C21 C22 C17 118.2(4) . . ?
 C21 C22 C23 119.6(3) . . ?
 C20 C19 C18 119.6(4) . . ?
 C25 C24 N3 106.8(3) . . ?
 N6 C7 C8 109.6(3) . . ?
 C1 C2 C3 114.2(3) . . ?
 C14 C13 N1 110.1(4) . . ?
 C17 C18 C19 120.9(4) . . ?
 N2 C16 C17 114.7(3) . . ?
 C13 C14 N2 105.9(4) . . ?
 N4 C26 N3 111.2(3) . . ?
 C10 C11 C12 113.4(3) . 2_656 ?
 C15 N2 C16 126.1(4) . . ?
 C15 N2 C14 107.7(3) . . ?
 C14 N2 C16 126.2(4) . . ?
 O9 C6 N5 121.9(4) . . ?
 O9 C6 N7 122.6(3) . . ?
 N7 C6 N5 115.4(3) . . ?
 O3 C9 O4 121.6(3) . 1_655 ?
 O3 C9 C8 121.1(3) . 2_766 ?
 O4 C9 C8 117.3(3) 1_655 2_766 ?
 C22 C17 C16 118.6(3) . . ?
 C18 C17 C22 119.6(3) . . ?
 C18 C17 C16 121.8(3) . . ?
 O10 C27 C28 121.8(5) . . ?
 O11 C27 O10 122.2(4) . . ?
 O11 C27 C28 115.9(6) . . ?
 O7 C4 N6 121.8(3) . . ?
 O7 C4 N5 122.2(3) . . ?
 N5 C4 N6 116.0(3) . . ?
 O5 C12 C11 116.1(4) . 2_656 ?
 O6 C12 O5 123.2(3) . . ?
 O6 C12 C11 120.7(4) . 2_656 ?
 C24 C25 N4 108.9(3) . . ?
 C7 C8 C9 115.1(3) . 2_766 ?
 N3 C23 C22 111.1(3) 2_757 . ?
 C31 N8 C29 119.9(4) . . ?
 C31 N8 C30 124.6(4) . . ?
 C30 N8 C29 115.5(4) . . ?
 C20 C21 C22 121.5(4) . . ?
 C19 C20 C21 120.0(4) . . ?
 O12 C31 N8 127.1(5) . . ?

_shelx_res_file
;
TITL
CELL 0.71073 9.3223 13.1795 16.5396 92.65 105.391 102.938
ZERR 2 0.0005 0.0005 0.001 0.004 0.005 0.004
LATT 1

SFAC C H N O Zn
UNIT 62 80 16 28 4

L.S. 4
PLAN  5
fmap 2
acta
OMIT -3 50
REM <HKL>C:/Users/dlm/Desktop/cif%20? ? /R-HNSF-16--ok3/struct/O-HNSF-16-tmp/s
REM -16.hkl</HKL>

WGHT    0.034000    0.415000
FVAR       0.24007
ZN1   5    1.219564    0.296574    0.815760    11.00000    0.02845    0.03260 =
         0.03063    0.00948    0.00643    0.00738
ZN2   5    0.695117    0.270049    0.780868    11.00000    0.02887    0.02990 =
         0.02772    0.00676    0.00704    0.01016
O2    4    0.907850    0.311367    0.767326    11.00000    0.02429    0.05213 =
         0.02618    0.00789    0.00683    0.01323
O3    4    1.416521    0.313052    0.784910    11.00000    0.02861    0.03345 =
         0.03995    0.01752    0.00983    0.01224
O7    4    0.747686    0.486865    0.486836    11.00000    0.06724    0.03024 =
         0.04166   -0.00596   -0.00320    0.01294
O1    4    1.087163    0.317459    0.703704    11.00000    0.02335    0.05738 =
         0.03138    0.01556    0.00621    0.01216
N6    3    0.606966    0.382697    0.366088    11.00000    0.03752    0.02196 =
         0.02423    0.00783    0.00072    0.00740
O5    4    0.622430    0.142162    0.705024    11.00000    0.07091    0.03051 =
         0.05599    0.00050    0.02270   -0.00570
N4    3    0.763006    0.296696    0.905623    11.00000    0.03095    0.03032 =
         0.02764    0.00546    0.00854    0.00609
N5    3    0.797352    0.328470    0.465205    11.00000    0.03402    0.02910 =
         0.02265    0.00761    0.00433    0.00850
C3    1    0.911955    0.345787    0.548094    11.00000    0.02790    0.04281 =
         0.02295    0.00758    0.00171    0.00433
AFIX  23
H3A   2    0.966040    0.419221    0.560118    11.00000   -1.20000
H3B   2    0.986370    0.305167    0.546889    11.00000   -1.20000
AFIX   0
O10   4    1.245342    0.417249    0.897460    11.00000    0.04142    0.06038 =
         0.04937   -0.00792    0.00179    0.01315
C5    1    0.569865    0.290333    0.313935    11.00000    0.04537    0.03180 =
         0.02890    0.00965    0.00732    0.00320
O9    4    0.825109    0.163583    0.444155    11.00000    0.06826    0.03993 =
         0.05368    0.01343    0.00734    0.02979
O4    4    0.602331    0.381100    0.730026    11.00000    0.03399    0.04392 =
         0.04464    0.01932    0.01836    0.02031
O8    4    0.472259    0.274939    0.246516    11.00000    0.06753    0.04802 =
         0.03353    0.00021   -0.01574    0.01174
C15   1    1.206950    0.070794    0.840507    11.00000    0.03619    0.04000 =
         0.04098    0.00734    0.00627    0.01233
AFIX  43
H15   2    1.299997    0.073564    0.828939    11.00000   -1.20000
AFIX   0
C1    1    0.950018    0.315085    0.701280    11.00000    0.02387    0.02582 =
         0.03280    0.00808    0.00536    0.00537
N1    3    1.138502    0.148851    0.834725    11.00000    0.03648    0.03175 =
         0.05182    0.01395    0.01450    0.00859
N7    3    0.652865    0.218346    0.341923    11.00000    0.04984    0.02295 =
         0.02568    0.00221    0.00821    0.00666
C10   1    0.611296    0.116052    0.290336    11.00000    0.05694    0.02881 =
         0.03823   -0.00444    0.01728    0.00148
AFIX  23
H10A  2    0.701589    0.088493    0.298057    11.00000   -1.20000
H10B  2    0.575272    0.125456    0.231179    11.00000   -1.20000
AFIX   0
N3    3    0.770028    0.312067    1.038829    11.00000    0.03363    0.02766 =
         0.02641    0.00623    0.00652    0.00776
C22   1    1.150116   -0.289334    0.810980    11.00000    0.04337    0.03714 =
         0.02706    0.00651    0.01208    0.00918
O11   4    1.365028    0.315086    0.977597    11.00000    0.08877    0.10266 =
         0.07204    0.02480    0.02878    0.03309
C19   1    0.906466   -0.272526    0.676138    11.00000    0.06910    0.07768 =
         0.04031    0.01170   -0.00791    0.01471
AFIX  43
H19   2    0.825128   -0.266647    0.631253    11.00000   -1.20000
AFIX   0
C24   1    0.910538    0.364896    1.033642    11.00000    0.03082    0.04712 =
         0.03419    0.00190    0.00434   -0.01048
AFIX  43
H24   2    0.993314    0.400819    1.078194    11.00000   -1.20000
AFIX   0
C7    1    0.520419    0.461583    0.338262    11.00000    0.03181    0.03240 =
         0.03806    0.01375    0.00715    0.01254
AFIX  23
H7A   2    0.514322    0.502370    0.387036    11.00000   -1.20000
H7B   2    0.416803    0.427011    0.305007    11.00000   -1.20000
AFIX   0
C2    1    0.838064    0.314608    0.617339    11.00000    0.02826    0.04968 =
         0.03025    0.00952    0.00627    0.00706
AFIX  23
H2A   2    0.775074    0.362285    0.623471    11.00000   -1.20000
H2B   2    0.770834    0.244883    0.600369    11.00000   -1.20000
AFIX   0
C13   1    1.006913    0.111818    0.858076    11.00000    0.04522    0.04351 =
         0.08351    0.02266    0.02553    0.01622
AFIX  43
H13   2    0.935055    0.149811    0.860686    11.00000   -1.20000
AFIX   0
C18   1    0.975413   -0.190824    0.740621    11.00000    0.06939    0.05124 =
         0.04716    0.00663   -0.00071    0.02124
AFIX  43
H18   2    0.939812   -0.130201    0.738500    11.00000   -1.20000
AFIX   0
C16   1    1.169348   -0.111560    0.880507    11.00000    0.07791    0.03143 =
         0.04241    0.00518   -0.00253    0.02336
AFIX  23
H16A  2    1.141475   -0.135583    0.930101    11.00000   -1.20000
H16B  2    1.280002   -0.098655    0.892946    11.00000   -1.20000
AFIX   0
C14   1    0.997396    0.013033    0.876505    11.00000    0.05015    0.04484 =
         0.08230    0.02431    0.03005    0.00960
AFIX  43
H14   2    0.919491   -0.029638    0.893625    11.00000   -1.20000
AFIX   0
C26   1    0.685476    0.272243    0.960714    11.00000    0.02802    0.03246 =
         0.03414    0.00669    0.00647    0.00939
AFIX  43
H26   2    0.584720    0.232341    0.946971    11.00000   -1.20000
AFIX   0
C11   1    0.488961    0.039254    0.314105    11.00000    0.06280    0.03003 =
         0.05834   -0.00639    0.02775   -0.00077
AFIX  23
H11A  2    0.399604    0.067745    0.307002    11.00000   -1.20000
H11B  2    0.525732    0.030263    0.373301    11.00000   -1.20000
AFIX   0
N2    3    1.125713   -0.012220    0.864988    11.00000    0.05208    0.02897 =
         0.04674    0.01298    0.01014    0.01487
C6    1    0.761595    0.231011    0.419167    11.00000    0.04239    0.03072 =
         0.03540    0.00952    0.01327    0.01004
O6    4    0.533644    0.076023    0.806361    11.00000    0.08022    0.04603 =
         0.06199   -0.01149    0.03541   -0.00124
C9    1    1.476465    0.381380    0.745115    11.00000    0.02568    0.02811 =
         0.02613    0.00673    0.00212    0.00800
C17   1    1.096022   -0.198359    0.807797    11.00000    0.04552    0.03746 =
         0.03133    0.00726    0.00636    0.00703
C27   1    1.316565    0.394098    0.970180    11.00000    0.03233    0.07597 =
         0.05648   -0.02855    0.01731   -0.00294
C4    1    0.718380    0.404461    0.442906    11.00000    0.03528    0.02876 =
         0.02628    0.01142    0.00677    0.00481
C12   1    0.558224    0.066357    0.737329    11.00000    0.03806    0.03047 =
         0.05092    0.00083    0.01046    0.00814
C25   1    0.906103    0.354945    0.951662    11.00000    0.03365    0.05187 =
         0.03425    0.00435    0.01006   -0.00062
AFIX  43
H25   2    0.986589    0.382862    0.929637    11.00000   -1.20000
AFIX   0
C8    1    0.599158    0.532717    0.286182    11.00000    0.03572    0.03876 =
         0.04690    0.02303    0.01687    0.01924
AFIX  23
H8A   2    0.604274    0.490556    0.237858    11.00000   -1.20000
H8B   2    0.703661    0.564424    0.319729    11.00000   -1.20000
AFIX   0
C23   1    1.277840   -0.303268    0.883286    11.00000    0.04699    0.04142 =
         0.02850    0.00776    0.01694    0.01741
AFIX  23
H23A  2    1.308861   -0.365959    0.869726    11.00000   -1.20000
H23B  2    1.365539   -0.243927    0.892179    11.00000   -1.20000
AFIX   0

N8    3    0.722151    0.863645    0.477118    11.00000    0.05037    0.06835 =
         0.04594    0.00968    0.01351    0.00605
O12   4    0.536783    0.784297    0.533677    11.00000    0.09636    0.13346 =
         0.08135    0.01277    0.04874   -0.01206
C21   1    1.078534   -0.369934    0.746031    11.00000    0.06573    0.04193 =
         0.03944   -0.00269    0.01774    0.00688
AFIX  43
H21   2    1.112171   -0.431329    0.747687    11.00000   -1.20000
AFIX   0
C28   1    1.335761    0.457247    1.048037    11.00000    0.09987    0.10065 =
         0.11133   -0.01353    0.01956    0.02504
AFIX 137
H28A  2    1.402644    0.524712    1.049516    11.00000   -1.50000
H28B  2    1.379688    0.423127    1.095107    11.00000   -1.50000
H28C  2    1.237684    0.465786    1.051129    11.00000   -1.50000
AFIX   0
C20   1    0.958574   -0.361145    0.679017    11.00000    0.07244    0.06313 =
         0.03710   -0.01204    0.00527   -0.00303
AFIX  43
H20   2    0.913342   -0.415858    0.635800    11.00000   -1.20000
AFIX   0

C29   1    0.796528    0.943089    0.548223    11.00000    0.13600    0.07941 =
         0.07690    0.00275    0.02973   -0.01150
AFIX 137
H29A  2    0.780403    1.009644    0.532203    11.00000   -1.50000
H29B  2    0.904580    0.947002    0.565611    11.00000   -1.50000
H29C  2    0.754011    0.925398    0.594092    11.00000   -1.50000
AFIX   0
C31   1    0.600807    0.792618    0.477978    11.00000    0.06678    0.09650 =
         0.06449   -0.00256    0.00268    0.00320
AFIX  43
H31   2    0.558205    0.742746    0.431031    11.00000   -1.20000
AFIX   6

O13   4    0.572743    0.952098    0.947245    11.00000    0.14379    0.18320 =
         0.10565    0.00300    0.01251    0.01965
H13A  2    0.650008    0.995934    0.940895    11.00000   -1.50000
AFIX   0

C30   1    0.790777    0.870884    0.408804    11.00000    0.07575    0.10651 =
         0.08805    0.00084    0.04483    0.00906
AFIX 137
H30A  2    0.792744    0.938091    0.388465    11.00000   -1.50000
H30B  2    0.731773    0.816700    0.363939    11.00000   -1.50000
H30C  2    0.893701    0.862703    0.428329    11.00000   -1.50000
AFIX   6

O14   4    0.751878    0.812470    0.911474    11.00000    0.14204    0.11719 =
         0.07667    0.02201   -0.00305   -0.04104
H14A  2    0.725615    0.770320    0.866678    11.00000   -1.50000
AFIX   0
H14B  2    0.672737    0.840133    0.924072    11.00000    0.21835
HKLF 4

REM
REM R1 =  0.0432 for    4816 Fo > 4sig(Fo)  and  0.0700 for all    6669 data
REM    509 parameters refined using      0 restraints

END

WGHT      0.0342      0.4153

REM Highest difference peak  0.369,  deepest hole -0.498,  1-sigma level  0.070
Q1    1   1.2937  0.4465  0.9743  11.00000  0.05    0.37
Q2    1   0.7441  0.3132  0.8563  11.00000  0.05    0.33
Q3    1   0.7022  0.5248  0.2793  11.00000  0.05    0.31
Q4    1   1.3037  0.3542  0.9445  11.00000  0.05    0.30
Q5    1   0.6450  0.7192  0.4611  11.00000  0.05    0.29
;
_shelx_res_checksum               66937
_shelx_hkl_file
;
   0   0   2  736.76    7.94
   0   0  -3  328.71    5.96
   0   0   3  339.34    6.03
   0   0   3  321.43    6.52
   0   0   4  534.15    8.79
   0   0  -4  526.63    8.73
   0   0   4  534.39    9.71
   0   0   5    0.86    1.01
   0   0  -5    0.85    0.81
   0   0   5    2.20    1.21
   0   0   6    1.09    0.97
   0   0  -6    2.87    1.06
   0   0   6    2.26    1.46
   0   0   7   58.15    3.94
   0   0   7   58.21    4.35
   0   0  -7   61.15    4.07
   0   0   8  155.21    6.74
   0   0  -8  157.69    6.92
   0   0  -9   29.49    3.27
   0   0   9   27.07    3.18
   0   0  10   11.68    2.38
   0   0 -10    9.56    2.19
   0   0 -11    1.38    1.31
   0   0  11   -0.42    1.45
   0   0 -12   79.06    6.22
   0   0  12   73.24    5.77
   0   0 -13    6.51    2.11
   0   0  13    7.33    2.21
   0   0  14   29.90    4.02
   0   0  15    8.42    2.61
   0   0  16    0.94    1.49
   0   0  17    0.57    1.53
   0   0  18    2.19    1.68
   0   0  19    1.94    1.89
   0   0  20    1.26    2.21
   0   0  21   -3.19    2.66
   0   0 -21    3.16    2.97
   0   0 -22   14.21    4.96
   0  -1  22    2.66    2.71
   0  -1  21    2.27    2.55
   0  -1  20    4.52    2.83
   0  -1  19   13.56    3.71
   0  -1  18    2.32    2.22
   0  -1  17   20.04    4.12
   0  -1  16    7.60    2.21
   0  -1  15    1.98    1.73
   0  -1  14    1.21    1.73
   0  -1  13   38.80    4.60
   0  -1  12    6.83    2.07
   0   1 -12   10.03    2.30
   0   1 -11  168.61    8.68
   0  -1  11  153.13    8.22
   0   1 -11  159.88    8.92
   0  -1  10    4.44    1.83
   0   1 -10    5.00    1.76
   0   1 -10    1.78    1.29
   0  -1   9   73.81    5.15
   0   1  -9   77.28    5.36
   0  -1   8    3.28    1.47
   0   1  -8    9.08    2.07
   0  -1   7   43.19    3.56
   0   1  -7   42.14    3.50
   0   1  -6  335.72    8.93
   0  -1   6  325.67    8.86
   0   1  -5   60.47    3.55
   0  -1   5   61.84    3.62
   0   1  -4   45.83    2.84
   0   1  -3   44.67    2.46
   0   1  -2  555.30    7.26
   0  -1  -2  538.66    7.23
   0   1   2  538.45    6.27
   0  -1  -2  536.10    6.20
   0  -1  -2  551.09    5.99
   0   1   2  538.74    7.19
   0   1   2  552.93    5.78
   0   1   3 1454.14   14.29
   0  -1  -3 1467.87   12.62
   0   1   3 1491.73   11.82
   0   1   4 1336.81   13.07
   0   1   4 1329.10   15.74
   0  -1  -4 1307.83   13.10
   0   1   5    2.36    1.01
   0  -1  -5    1.03    0.85
   0   1   5    3.95    1.41
   0  -1  -6  462.86    9.72
   0   1   6  458.12   11.31
   0   1   6  470.85    9.70
   0   1   7  173.40    7.51
   0   1   7  168.46    6.38
   0  -1  -7  173.95    6.54
   0  -1  -8   -0.95    1.04
   0   1   8    0.45    1.31
   0   1   8   -0.82    1.09
   0  -1  -9  109.03    5.90
   0   1   9  104.06    5.79
   0   1   9  107.99    6.72
   0  -1 -10    9.23    2.09
   0   1  10    6.83    1.88
   0   1  10    7.26    2.09
   0   1  11   67.74    5.27
   0  -1 -11   79.82    5.79
   0  -1 -12    6.09    1.96
   0   1  12    1.62    1.51
   0   1  13    0.69    1.36
   0  -1 -13    1.06    1.42
   0   1  14   35.97    4.46
   0   1  15   49.25    5.40
   0  -1 -15   45.49    3.84
   0   1  16    5.00    2.23
   0   1  17    9.22    2.85
   0  -1 -18   11.57    4.19
   0   1  18   -1.37    1.85
   0  -1 -19   13.02    4.24
   0   1  19    6.73    2.75
   0  -1 -20    0.89    2.90
   0   1  20    0.52    1.91
   0  -1 -21    7.14    3.57
   0  -2  21    2.72    1.92
   0  -2  20    2.46    2.37
   0  -2  19    5.02    2.50
   0  -2  18    7.49    2.97
   0  -2  17    5.56    2.64
   0  -2  16    1.01    1.74
   0  -2  15    0.52    1.61
   0  -2  14   24.54    4.03
   0  -2  13   11.49    2.82
   0   2 -12   76.30    6.37
   0  -2  12   63.54    5.69
   0  -2  11   11.42    2.62
   0   2 -11   14.54    2.71
   0   2 -11    8.86    2.35
   0   2 -10   54.82    5.02
   0  -2  10   51.23    4.72
   0   2 -10   56.67    4.99
   0   2  -9  314.84   11.08
   0  -2   9  301.74   10.61
   0   2  -8   77.36    5.18
   0   2  -8   72.64    5.02
   0  -2   8   71.37    5.00
   0   2  -7  135.58    6.39
   0   2  -7  134.54    6.39
   0  -2   7  138.84    6.54
   0   2  -6   22.63    2.59
   0  -2   6   19.15    2.51
   0   2  -6   22.18    2.54
   0   2  -5   61.56    3.79
   0   2  -5   53.32    3.41
   0   2  -4  200.31    6.24
   0   2  -4  195.79    5.72
   0   2  -3   50.31    2.89
   0   2  -2  991.55   11.12
   0   2  -1  178.84    4.15
   0   2   0 2186.83   12.51
   0  -2   0 2142.35   15.12
   0  -2  -1  282.56    5.62
   0  -2  -1  294.02    4.56
   0   2   1  297.19    4.62
   0   2   2  142.69    3.48
   0  -2  -2  138.57    4.34
   0  -2  -2  140.94    3.48
   0  -2  -3  257.87    5.34
   0  -2  -3  261.73    6.56
   0   2   3  262.09    5.70
   0  -2  -3  263.09    5.59
   0   2   3  257.75    6.26
   0   2   3  258.81    5.41
   0  -2  -4  341.04    8.25
   0  -2  -4  332.28    6.60
   0   2   4  350.68    6.56
   0  -2  -4  345.33    7.03
   0   2   4  347.83    8.30
   0   2   5 1263.51   13.93
   0   2   5 1273.33   17.38
   0  -2  -5 1285.49   13.54
   0  -2  -5 1266.71   15.10
   0  -2  -5 1259.95   17.11
   0  -2  -6    4.06    1.03
   0  -2  -6    3.00    1.12
   0  -2  -6    3.52    1.73
   0   2   6    4.42    1.28
   0   2   6    4.48    1.48
   0  -2  -7  304.12    7.33
   0   2   7  321.91    8.46
   0  -2  -7  295.68    9.81
   0   2   7  314.76   10.28
   0  -2  -7  311.19    8.98
   0  -2  -8  187.43    7.60
   0   2   8  184.60    6.97
   0  -2  -8  176.67    5.90
   0   2   8  198.06    8.68
   0   2   9    1.19    1.38
   0   2   9    2.50    1.38
   0  -2  -9    1.04    1.02
   0  -2  -9    2.54    1.09
   0  -2 -10   47.18    4.30
   0   2  10   55.64    5.30
   0  -2 -10   46.37    3.33
   0   2  10   43.71    3.90
   0  -2 -11   11.34    1.86
   0   2  11    7.77    2.39
   0  -2 -11   11.01    2.39
   0   2  11   10.12    2.29
   0  -2 -12    2.41    1.18
   0  -2 -12    3.82    1.84
   0   2  12    2.65    1.40
   0  -2 -13    2.95    1.76
   0  -2 -13    2.94    2.61
   0  -2 -13    2.55    1.26
   0   2  13    0.34    1.24
   0  -2 -14    0.67    0.93
   0   2  14    1.66    1.27
   0  -2 -15    8.24    3.25
   0   2  15   11.15    2.52
   0  -2 -15    8.76    1.79
   0  -2 -16   11.60    3.74
   0   2  16    4.00    2.24
   0  -2 -17    4.88    3.10
   0   2  17    0.63    1.43
   0  -2 -18    8.67    3.75
   0   2  18    1.99    1.71
   0  -2 -19   -2.27    2.46
   0   2  19   -1.60    1.58
   0  -2 -20   13.26    4.04
   0  -2 -21    1.86    2.80
   0  -3  21    7.39    3.40
   0  -3  20    7.31    2.93
   0  -3  19    2.51    2.46
   0  -3  18   -1.75    2.47
   0  -3  17    5.56    2.61
   0  -3  16    1.35    2.04
   0  -3  15   -0.35    1.50
   0  -3  14    3.48    2.12
   0  -3  13   51.74    5.56
   0  -3  12  102.84    7.44
   0  -3  11   37.89    4.50
   0   3 -11   33.56    4.21
   0   3 -11   40.31    4.50
   0   3 -10   50.19    4.86
   0   3 -10   50.41    4.80
   0  -3  10   41.91    4.42
   0  -3   9    2.21    1.37
   0   3  -9    2.93    1.74
   0   3  -9    1.75    1.07
   0   3  -8  233.64    8.97
   0  -3   8  223.04    9.00
   0   3  -8  252.27    9.65
   0   3  -7    0.93    1.06
   0   3  -7    0.72    0.99
   0   3  -6  352.02   10.15
   0   3  -6  354.96    9.53
   0   3  -5  406.03   10.18
   0   3  -4    1.27    1.04
   0   3  -3    5.78    1.27
   0   3  -2  193.78    5.58
   0   3  -1  743.67    9.85
   0   3   0 1283.26    9.52
   0   3   0 1313.67   11.92
   0  -3   0 1343.61   14.59
   0  -3  -1  238.42    5.04
   0  -3  -1  252.16    6.42
   0  -3  -1  241.05    4.63
   0   3   1  240.00    5.10
   0   3   1  243.28    4.80
   0   3   2  393.72    6.65
   0  -3  -2  390.83    8.31
   0  -3  -2  388.62    6.57
   0   3   3   29.78    2.05
   0  -3  -3   32.86    2.71
   0   3   3   28.80    2.29
   0  -3  -3   28.70    1.96
   0   3   4  183.24    5.72
   0  -3  -4  173.45    5.17
   0   3   4  186.77    6.68
   0   3   4  186.90    6.26
   0   3   4  179.84    5.32
   0  -3  -4  187.79    6.56
   0   3   5   90.25    3.81
   0  -3  -5   90.24    4.04
   0   3   5   90.35    4.82
   0  -3  -5   88.60    4.88
   0  -3  -5   83.61    3.94
   0   3   6  224.06    6.46
   0   3   6  225.77    8.22
   0  -3  -6  230.91    6.67
   0  -3  -6  215.75    6.86
   0  -3  -6  222.31    8.23
   0  -3  -7   83.47    4.65
   0   3   7   76.54    4.11
   0  -3  -7   76.57    4.03
   0  -3  -7   79.70    5.29
   0   3   7   76.37    5.18
   0  -3  -8   12.16    1.71
   0  -3  -8   13.12    2.15
   0   3   8   15.78    2.18
   0   3   8   11.37    2.36
   0  -3  -8   10.48    2.37
   0   3   9   60.43    4.24
   0  -3  -9   58.82    5.14
   0  -3  -9   55.12    3.69
   0  -3  -9   56.41    4.34
   0   3   9   58.71    5.23
   0   3  10   11.62    2.18
   0  -3 -10   10.25    2.79
   0   3  10   14.15    2.95
   0  -3 -10   16.19    2.16
   0  -3 -10   12.45    2.34
   0  -3 -11   35.11    4.41
   0   3  11   37.52    3.82
   0  -3 -11   40.95    4.19
   0  -3 -11   32.46    3.04
   0   3  11   41.31    4.85
   0  -3 -12    6.44    1.92
   0  -3 -12    9.33    3.12
   0  -3 -12    4.29    1.39
   0   3  12    4.68    1.83
   0   3  12    5.24    1.99
   0   3  13   36.08    4.06
   0  -3 -13   46.56    4.98
   0  -3 -13   35.98    4.98
   0  -3 -13   41.33    3.55
   0   3  14   82.83    6.29
   0  -3 -14   74.74    7.12
   0  -3 -14   79.48    4.91
   0  -3 -15   13.47    3.73
   0   3  15   11.51    2.73
   0   3  16   14.55    3.02
   0  -3 -16   19.57    4.33
   0   3  17    1.81    1.37
   0  -3 -17    1.78    2.35
   0   3  18    1.92    1.57
   0  -3 -18   -1.06    2.49
   0  -3 -19   12.25    3.79
   0  -3 -20   -1.53    2.50
   0  -3 -21    1.49    2.84
   0  -4  21    2.29    1.92
   0  -4  20   -2.98    2.97
   0  -4  19    1.26    2.01
   0  -4  18    2.27    2.14
   0  -4  17    2.69    2.11
   0  -4  16    4.06    2.25
   0  -4  15    0.38    1.34
   0  -4  14    2.86    2.34
   0  -4  13    2.24    1.67
   0  -4  12   32.00    4.42
   0  -4  11   86.96    6.76
   0   4 -11   84.08    6.44
   0  -4  10   93.90    6.81
   0   4 -10  101.23    7.04
   0   4 -10  103.21    6.72
   0  -4   9  313.30   11.78
   0   4  -9  330.84   12.10
   0   4  -9  335.98   11.40
   0   4  -8   10.93    2.32
   0   4  -8    9.25    1.95
   0   4  -7  512.24   13.59
   0   4  -7  512.35   12.31
   0   4  -6  176.60    6.74
   0   4  -6  171.37    7.51
   0   4  -5   60.21    4.21
   0   4  -4  545.49   11.77
   0   4  -3    1.16    1.12
   0   4  -2  314.10    7.82
   0  -4   1  597.48   10.04
   0   4  -1  598.01    9.98
   0  -4   0   12.90    1.45
   0   4   0   12.07    1.41
   0   4   0   12.25    1.13
   0   4   0   10.80    1.42
   0  -4   0   11.21    1.74
   0   4   1  858.00   10.61
   0  -4  -1  879.07    9.88
   0   4   1  872.76   11.30
   0  -4  -1  886.43   13.98
   0  -4  -2    0.13    0.91
   0  -4  -2    0.51    0.53
   0  -4  -2    0.01    0.63
   0   4   2   -0.54    0.69
   0   4   3  461.52   10.75
   0   4   3  452.76    9.99
   0  -4  -3  440.83    8.26
   0   4   3  456.65    8.28
   0  -4  -3  455.89   10.58
   0   4   4  287.17    7.00
   0   4   4  300.13    8.25
   0  -4  -4  281.39    6.91
   0   4   4  302.34    9.25
   0  -4  -4  303.01    9.10
   0   4   5  147.62    6.83
   0   4   5  145.54    5.89
   0   4   5  144.06    5.37
   0  -4  -5  140.31    6.57
   0   4   5  150.28    6.38
   0  -4  -5  131.01    5.09
   0   4   6  377.70    8.43
   0  -4  -6  357.61   10.92
   0  -4  -6  356.55    8.95
   0   4   6  368.20   10.79
   0   4   7   89.23    5.69
   0  -4  -7   89.35    4.77
   0  -4  -7   87.34    5.73
   0   4   7   95.30    4.60
   0   4   8   56.38    3.79
   0  -4  -8   57.10    4.91
   0  -4  -8   58.62    4.17
   0   4   8   58.31    4.95
   0   4   9   -0.28    1.10
   0  -4  -9   -1.63    1.27
   0  -4  -9    0.07    1.44
   0   4   9   -0.84    1.32
   0  -4  -9   -0.52    1.06
   0   4  10    5.54    2.04
   0   4  10    3.92    1.40
   0  -4 -10    4.90    1.27
   0  -4 -10    3.45    1.28
   0  -4 -10    5.53    2.00
   0   4  11   38.12    3.72
   0  -4 -11   34.23    3.86
   0  -4 -11   37.83    3.39
   0  -4 -11   38.53    4.68
   0   4  11   35.87    4.70
   0  -4 -12   14.97    3.31
   0   4  12   19.24    3.74
   0   4  12   17.49    2.80
   0  -4 -12   22.57    3.36
   0  -4 -13    0.69    1.26
   0  -4 -13    1.39    2.01
   0   4  13    1.35    1.27
   0   4  14   10.21    2.43
   0  -4 -14    8.54    2.91
   0   4  15    0.71    1.34
   0  -4 -15   -0.69    1.91
   0   4  16    3.20    1.93
   0  -4 -16   -0.37    2.55
   0  -4 -17    1.12    1.95
   0   4  17   -1.46    1.52
   0  -4 -18   14.31    3.94
   0  -4 -19    2.66    2.51
   0  -4 -20   18.21    4.59
   0  -5  20   -0.22    1.99
   0  -5  19    5.83    3.07
   0  -5  18   -2.89    2.66
   0  -5  17    3.18    1.93
   0  -5  16    2.63    2.15
   0  -5  15   -0.09    1.95
   0  -5  14   -0.13    1.87
   0  -5  13    6.29    2.44
   0  -5  12   13.32    3.09
   0   5 -11    2.52    1.28
   0  -5  11    4.02    1.80
   0   5 -10  255.99   10.64
   0  -5  10  244.83   11.26
   0   5  -9    6.21    2.05
   0   5  -9    4.53    1.46
   0  -5   9    5.52    2.02
   0   5  -8  305.41   11.54
   0   5  -8  305.85   10.27
   0   5  -7  178.60    7.32
   0   5  -7  186.47    8.60
   0   5  -6  366.82   11.40
   0   5  -5  309.57   10.04
   0   5  -4    3.13    1.29
   0  -5   3  406.04   10.40
   0   5  -3  430.94   10.49
   0   5  -2   69.48    4.00
   0  -5   2   67.72    4.03
   0   5  -1   78.68    4.01
   0  -5   1   75.80    4.01
   0   5   0  814.25   12.59
   0   5   0  823.98    9.65
   0   5   0  820.85   12.22
   0  -5   0  794.47   12.16
   0  -5  -1   65.45    4.35
   0   5   1   64.69    3.33
   0   5   1   59.79    3.40
   0  -5  -2  925.10   16.12
   0  -5  -2  880.11   11.90
   0  -5  -2  893.18   12.46
   0   5   2  918.81   11.90
   0   5   2  898.45   12.68
   0   5   3   47.96    3.97
   0   5   3   50.32    3.11
   0  -5  -3   51.18    3.17
   0  -5  -3   44.21    3.74
   0   5   3   48.68    3.77
   0  -5  -3   46.13    2.94
   0   5   4  330.33    7.96
   0   5   4  334.24    9.65
   0  -5  -4  319.99    7.89
   0  -5  -4  332.95   10.26
   0   5   4  344.92   10.61
   0   5   5   79.54    4.18
   0  -5  -5   76.77    4.08
   0  -5  -5   81.04    5.40
   0   5   5   70.86    5.05
   0   5   5   85.16    4.99
   0   5   5   80.35    4.87
   0  -5  -6   -0.65    1.40
   0   5   6    0.64    1.03
   0  -5  -6    0.09    0.83
   0   5   6    0.39    1.18
   0   5   6    1.60    1.33
   0  -5  -7    8.27    1.69
   0  -5  -7   11.78    2.46
   0   5   7    8.18    1.92
   0   5   7    8.30    1.60
   0   5   8    5.97    1.95
   0  -5  -8   10.15    2.62
   0  -5  -8    6.95    1.62
   0   5   8    8.30    1.67
   0   5   9    1.25    1.19
   0  -5  -9   -0.72    1.21
   0  -5  -9    1.49    1.96
   0   5   9   -0.88    1.46
   0   5  10   52.55    5.41
   0  -5 -10   45.46    4.89
   0   5  10   42.00    3.64
   0  -5 -10   41.20    3.99
   0  -5 -11   26.35    4.12
   0   5  11   30.66    3.30
   0   5  11   28.51    4.21
   0  -5 -11   22.32    3.10
   0   5  12   24.27    4.20
   0  -5 -12   18.35    3.02
   0   5  12   20.23    2.84
   0  -5 -12   12.66    3.02
   0  -5 -13   10.07    2.59
   0  -5 -13    7.38    2.46
   0   5  13    8.59    2.10
   0   5  13    8.56    2.65
   0   5  14   10.00    2.49
   0  -5 -14    8.00    2.68
   0  -5 -15   13.36    3.53
   0   5  15   18.03    3.14
   0  -5 -16   -2.95    2.04
   0   5  16    0.11    1.26
   0  -5 -17   31.45    5.49
   0  -5 -18    4.72    3.08
   0  -5 -19    7.25    3.26
   0  -5 -20   12.44    4.04
   0  -6  20    1.47    2.44
   0  -6  19    1.10    2.10
   0  -6  18   -2.23    2.91
   0  -6  17    2.43    1.99
   0  -6  16    0.83    1.80
   0  -6  15    5.43    2.47
   0  -6  14   -0.75    2.09
   0  -6  13    3.05    1.78
   0  -6  12    0.75    1.58
   0  -6  11   88.27    7.33
   0   6 -11   73.94    6.05
   0   6 -10    0.80    1.02
   0  -6  10    1.91    1.75
   0   6  -9  249.69    9.90
   0  -6   9  241.67   11.13
   0   6  -8   48.77    4.21
   0   6  -8   46.81    4.80
   0   6  -7  212.14    9.57
   0   6  -6  324.88   11.33
   0   6  -5   90.24    5.72
   0   6  -4  216.43    8.45
   0   6  -3   15.19    2.33
   0  -6   3   14.76    2.27
   0   6  -2  217.26    7.60
   0  -6   2  198.74    7.31
   0  -6   1  380.05    9.64
   0   6  -1  390.13    7.07
   0   6  -1  388.98    9.67
   0   6   0   15.46    2.03
   0   6   0   17.43    2.10
   0   6   0   15.43    1.53
   0  -6   0   14.69    1.85
   0   6   1  616.06   11.16
   0  -6  -1  642.41   14.72
   0   6   1  639.72   11.95
   0  -6  -2   16.37    1.77
   0  -6  -2   17.55    2.67
   0   6   2   16.64    2.04
   0   6   2   16.82    2.50
   0   6   2   19.14    2.00
   0   6   3   17.95    1.87
   0  -6  -3   15.90    2.50
   0   6   3   19.65    2.19
   0  -6  -3   13.97    1.80
   0  -6  -3   13.84    1.76
   0   6   3   15.71    2.47
   0  -6  -4  171.03    6.53
   0  -6  -4  180.20    8.11
   0   6   4  177.80    6.29
   0  -6  -4  168.17    6.10
   0  -6  -5   30.47    3.64
   0  -6  -5   34.58    3.25
   0   6   5   28.12    3.01
   0   6   5   30.21    2.76
   0  -6  -5   26.19    2.52
   0   6   6   18.48    2.54
   0   6   6   21.03    2.44
   0  -6  -6   17.50    2.73
   0  -6  -6   18.86    2.29
   0  -6  -7    2.31    1.01
   0  -6  -7    1.40    1.35
   0   6   7    2.61    1.20
   0   6   7    2.88    1.46
   0   6   7    2.25    1.48
   0  -6  -8    9.18    1.89
   0  -6  -8   12.24    2.78
   0   6   8   11.65    1.96
   0   6   8    9.91    2.43
   0   6   9    4.84    1.51
   0   6   9    4.94    1.98
   0  -6  -9    5.29    2.16
   0  -6  -9    5.11    1.51
   0  -6 -10    1.28    1.65
   0   6  10   -0.98    0.99
   0  -6 -10   -0.92    0.89
   0   6  10    0.62    1.17
   0  -6 -11    1.67    1.41
   0  -6 -11    0.68    1.75
   0   6  11    2.77    1.47
   0   6  11    1.55    1.43
   0  -6 -12    1.12    1.44
   0   6  12    3.58    1.52
   0  -6 -12    5.13    1.80
   0   6  12    1.16    1.51
   0   6  13   -0.06    2.10
   0  -6 -13    1.12    1.06
   0   6  13    3.02    1.63
   0  -6 -13    1.33    1.87
   0  -6 -14   26.05    4.73
   0   6  14   24.18    3.30
   0  -6 -15    1.91    2.01
   0   6  15    3.34    1.75
   0  -6 -16   11.62    3.73
   0  -6 -17    4.11    2.85
   0  -6 -18    6.77    2.68
   0  -6 -19    3.10    2.62
   0  -7  19    5.60    2.93
   0  -7  18    6.91    3.01
   0  -7  17    3.88    2.17
   0  -7  16   11.74    3.80
   0  -7  15    0.69    2.21
   0  -7  14   16.97    3.85
   0  -7  13    2.34    2.25
   0  -7  12   65.13    6.79
   0  -7  11   11.86    2.97
   0   7 -11   11.57    2.53
   0   7 -10  176.87    8.94
   0  -7  10  190.00   10.66
   0  -7   9  107.71    7.72
   0   7  -9  121.31    6.92
   0  -7   8  155.03    8.90
   0   7  -8  151.53    7.36
   0   7  -7   18.16    3.14
   0  -7   7   20.10    3.23
   0   7  -6    9.05    2.11
   0  -7   6   10.66    2.33
   0   7  -5  252.00   10.02
   0   7  -4    2.44    1.29
   0   7  -3   86.58    5.45
   0  -7   2  100.82    5.66
   0   7  -2  101.63    5.61
   0   7  -1   89.39    5.22
   0  -7   1   93.66    5.17
   0   7  -1   83.98    3.60
   0   7  -1   86.40    4.98
   0   7   0  278.84    8.57
   0   7   0  273.55    6.63
   0   7   0  275.51    8.81
   0   7   1  130.16    5.60
   0  -7  -1  140.30    7.45
   0   7   1  143.79    6.20
   0   7   2  282.87    8.50
   0  -7  -2  274.15   10.49
   0   7   2  270.99    7.81
   0  -7  -3  142.82    5.78
   0   7   3  144.19    5.62
   0  -7  -3  146.01    7.78
   0   7   3  150.56    6.16
   0   7   4    0.73    0.97
   0  -7  -4    1.16    0.83
   0  -7  -4    0.83    0.64
   0   7   4    2.03    1.47
   0   7   4    0.20    0.72
   0  -7  -4    1.66    1.43
   0   7   5    0.36    0.72
   0   7   5    0.34    0.90
   0  -7  -5   -0.70    1.53
   0  -7  -5    0.66    0.72
   0  -7  -5    1.02    0.83
   0   7   5   -0.40    1.31
   0   7   5   -0.11    0.97
   0   7   6    2.30    1.29
   0  -7  -6    2.78    1.06
   0  -7  -6    1.95    1.73
   0   7   6    2.12    1.26
   0   7   6    2.16    1.93
   0   7   7   15.66    3.32
   0  -7  -7    7.58    2.38
   0   7   7   12.97    2.16
   0   7   7   12.59    2.40
   0  -7  -7   12.34    2.04
   0   7   8   -0.13    1.03
   0  -7  -8    0.72    0.96
   0   7   8    0.99    1.38
   0  -7  -8   -2.29    2.08
   0  -7  -9   -2.25    1.82
   0   7   9   -0.81    1.55
   0  -7  -9    0.07    0.80
   0   7   9    0.60    1.03
   0   7  10    5.01    1.53
   0  -7 -10    6.01    2.41
   0  -7 -10    2.52    1.25
   0   7  10    5.25    2.18
   0  -7 -11    1.96    1.20
   0   7  11    1.51    1.68
   0  -7 -11    1.20    1.96
   0   7  11    3.00    1.42
   0  -7 -12    0.93    1.11
   0   7  12   -0.98    1.51
   0  -7 -12   -1.45    2.20
   0   7  12    0.67    1.11
   0  -7 -13    3.11    2.40
   0   7  13   -0.01    1.68
   0   7  13    0.56    1.08
   0  -7 -14   -2.24    2.28
   0   7  14    1.09    1.01
   0  -7 -15   22.38    4.43
   0  -7 -16    4.23    2.32
   0  -7 -17    6.91    2.72
   0  -7 -18   13.48    3.73
   0  -7 -19    0.05    2.70
   0  -8  18   -0.09    1.86
   0  -8  17    0.38    2.20
   0  -8  16    3.43    2.52
   0  -8  15    7.11    2.50
   0  -8  14   77.22    8.06
   0  -8  13    2.56    2.13
   0  -8  12    6.59    2.66
   0   8 -11  140.89    8.35
   0  -8  11  137.36    9.69
   0  -8  10   26.55    4.14
   0   8 -10   29.53    3.73
   0  -8   9   25.22    3.97
   0   8  -9   25.63    3.41
   0   8  -8  268.79    9.83
   0  -8   8  262.19   12.02
   0  -8   7    2.15    1.39
   0  -8   6  202.17    9.87
   0   8  -6  219.77   10.16
   0  -8   5   17.81    3.09
   0   8  -5   16.40    2.77
   0   8  -4   64.21    5.21
   0   8  -4   64.42    5.62
   0   8  -3   79.10    5.47
   0   8  -2   46.54    4.12
   0   8  -1  241.80    6.41
   0   8  -1  231.42    8.85
   0   8  -1  237.77    8.76
   0   8   0   20.86    3.21
   0   8   0   19.31    2.61
   0   8   0   16.74    2.34
   0   8   1   51.14    3.82
   0   8   1   51.79    4.06
   0   8   1   53.29    4.92
   0  -8  -2   86.64    6.41
   0   8   2   83.03    5.03
   0   8   2   85.23    6.36
   0   8   2   80.06    4.61
   0   8   3   -1.58    1.87
   0   8   3   -0.53    1.32
   0   8   3   -0.33    0.70
   0   8   3    0.69    1.07
   0  -8  -3   -0.04    1.14
   0   8   4   15.90    2.32
   0  -8  -4   12.07    2.78
   0   8   4   12.05    2.66
   0   8   4   12.12    1.76
   0  -8  -4   11.71    1.92
   0   8   4   13.02    2.51
   0   8   5    7.11    2.42
   0   8   5    7.37    1.70
   0   8   5    5.62    1.32
   0   8   5    3.08    1.75
   0  -8  -5    5.71    1.37
   0  -8  -5    5.78    1.87
   0   8   5    5.32    1.57
   0   8   6   11.67    2.30
   0  -8  -6    9.48    2.56
   0  -8  -6   12.70    2.11
   0   8   6   11.17    2.00
   0   8   6    9.80    2.52
   0   8   6   13.78    1.89
   0   8   7   10.85    2.39
   0  -8  -7    2.56    1.95
   0  -8  -7    8.99    1.80
   0  -8  -7    7.41    1.98
   0   8   7    7.45    2.36
   0   8   7    6.37    1.68
   0  -8  -8    8.49    2.69
   0  -8  -8    5.62    1.52
   0   8   8   10.34    2.51
   0  -8  -8    7.65    2.17
   0   8   8   11.42    2.02
   0   8   9   -0.88    1.27
   0  -8  -9   -0.91    1.62
   0  -8  -9    0.56    0.88
   0   8   9    0.48    1.21
   0  -8 -10    4.72    2.28
   0   8  10    2.68    1.85
   0   8  10    4.71    1.61
   0  -8 -10    2.84    1.34
   0  -8 -11    3.45    2.16
   0   8  11    7.23    1.77
   0  -8 -11    3.26    1.46
   0   8  12    0.47    1.39
   0  -8 -12   -1.73    2.47
   0   8  12   -1.49    1.86
   0  -8 -13    6.51    2.77
   0   8  13    2.68    2.03
   0  -8 -14    4.24    2.49
   0  -8 -15    6.11    2.81
   0  -8 -16   17.84    4.38
   0  -8 -17    5.67    2.96
   0  -8 -18   -4.58    2.75
   0  -9  17   45.15    7.13
   0  -9  16    0.45    2.21
   0  -9  15    2.13    2.07
   0  -9  14   -2.96    2.68
   0  -9  13   22.20    4.53
   0  -9  12    2.47    1.93
   0  -9  11    3.18    1.93
   0   9 -10   22.10    3.25
   0  -9  10   19.77    3.94
   0  -9   9   20.75    3.76
   0   9  -9   26.78    3.44
   0   9  -8   15.39    2.58
   0  -9   8   16.68    3.30
   0  -9   7  121.67    8.30
   0  -9   6   33.18    4.27
   0   9  -5  240.33   10.71
   0  -9   5  235.72   10.63
   0   9  -4  144.72    8.02
   0  -9   4  123.80    7.53
   0   9  -3   25.37    3.33
   0  -9   3   23.12    3.26
   0   9  -2  192.06    6.02
   0   9  -2  193.45    8.68
   0   9  -2  178.97    8.57
   0   9  -1    8.92    1.34
   0   9  -1    8.69    2.03
   0   9  -1   10.92    2.23
   0   9   0  137.57    7.08
   0   9   0  129.91    6.66
   0   9   1   61.24    4.42
   0   9   1   65.16    4.86
   0  -9  -2   43.46    4.89
   0   9   2   38.31    3.48
   0   9   2   46.81    4.01
   0   9   3   35.27    3.25
   0   9   3   34.69    3.50
   0   9   3   37.95    4.49
   0  -9  -3   31.20    4.21
   0   9   4   26.34    2.74
   0   9   4   26.13    3.08
   0  -9  -4   25.96    3.91
   0   9   4   18.13    3.29
   0   9   5    6.08    2.12
   0  -9  -5   14.01    3.10
   0   9   5    9.92    1.70
   0   9   5    7.51    1.83
   0   9   5    9.62    2.00
   0   9   6    0.54    1.20
   0   9   6   -0.03    0.99
   0   9   6    1.66    0.92
   0  -9  -6    4.10    1.56
   0  -9  -6   -0.81    1.69
   0  -9  -6    1.50    0.95
   0   9   6    2.35    1.95
   0   9   7    7.18    2.46
   0  -9  -7    7.24    2.55
   0   9   7    7.58    1.49
   0  -9  -7    7.73    2.18
   0  -9  -7    5.86    1.49
   0   9   7   10.35    2.14
   0   9   7    8.16    2.10
   0  -9  -8    1.04    0.95
   0  -9  -8    0.39    1.46
   0   9   8   -1.18    1.51
   0   9   8   -0.89    0.82
   0   9   8    2.24    1.51
   0  -9  -9    2.05    1.27
   0  -9  -9   -0.01    1.36
   0   9   9    2.39    1.28
   0   9   9    0.70    0.74
   0   9   9    3.14    1.80
   0  -9 -10    3.13    2.22
   0   9  10    6.33    2.42
   0   9  10    2.64    1.22
   0   9  11    1.39    2.06
   0  -9 -11    1.33    1.51
   0   9  11    1.05    1.13
   0   9  12    9.70    3.07
   0  -9 -12    7.60    2.97
   0   9  13   17.10    3.90
   0  -9 -13   15.17    3.95
   0  -9 -14    1.48    2.05
   0  -9 -15    7.77    3.11
   0  -9 -16    1.37    2.11
   0  -9 -17   -1.21    2.12
   0 -10  17    3.94    2.54
   0 -10  16   15.90    4.49
   0 -10  15    9.88    3.39
   0 -10  14   36.34    5.85
   0 -10  13   56.83    7.04
   0 -10  12    0.78    2.07
   0 -10  11   44.44    5.90
   0  10 -10   50.99    4.86
   0 -10  10   42.77    5.64
   0  10  -9   10.24    2.23
   0 -10   9    6.66    2.75
   0  10  -8   11.61    2.25
   0 -10   8    5.97    2.33
   0 -10   7    1.41    1.64
   0 -10   6   87.50    7.11
   0 -10   5   37.92    4.62
   0  10  -4   79.65    6.32
   0 -10   4   69.01    5.89
   0 -10   3  136.11    8.00
   0  10  -3  154.31    8.48
   0  10  -3  152.89    5.63
   0  10  -2    1.81    1.40
   0  10  -2    1.59    1.42
   0 -10   2    3.93    1.71
   0  10  -2    1.36    0.77
   0  10  -1  103.19    6.71
   0  10  -1  102.34    6.48
   0  10   0   94.85    5.99
   0  10   0   78.83    5.69
   0  10   1    1.02    1.22
   0  10   1    1.59    1.23
   0  10   2   65.04    4.70
   0  10   2   57.81    5.93
   0  10   2   70.10    5.23
   0 -10  -3    3.10    1.61
   0  10   3    4.87    1.64
   0  10   3    4.12    1.35
   0  10   3    1.15    1.70
   0  10   4    6.51    1.64
   0  10   4    7.60    2.01
   0  10   4    2.59    1.90
   0 -10  -4    4.97    2.25
   0  10   4    3.30    1.28
   0  10   5    0.25    0.87
   0  10   5   -0.45    1.19
   0 -10  -5    0.87    1.67
   0  10   5   -0.75    1.28
   0  10   5   -2.23    1.99
   0 -10  -6   -0.05    0.94
   0  10   6    1.09    1.14
   0 -10  -6    0.62    1.43
   0  10   6    3.81    1.57
   0  10   6    0.61    1.84
   0  10   6    1.04    0.85
   0  10   7    5.53    1.75
   0  10   7    3.77    2.41
   0 -10  -7    1.48    1.85
   0  10   7    2.09    0.98
   0  10   7    4.66    1.68
   0  10   8   -2.00    1.52
   0 -10  -8    1.19    1.78
   0  10   8   -1.67    1.68
   0 -10  -8    0.21    0.79
   0  10   8    1.43    0.89
   0  10   8    3.70    2.30
   0  10   9   -1.12    1.80
   0 -10  -9   -0.01    1.44
   0  10   9   -0.64    1.03
   0  10  10    2.48    1.64
   0 -10 -10    0.05    2.02
   0  10  11   10.02    2.96
   0 -10 -11    7.99    3.17
   0 -10 -12    1.29    1.70
   0  10  12   -1.60    1.84
   0 -10 -13    0.77    2.08
   0 -10 -14    4.07    2.51
   0 -10 -15    8.00    3.40
   0 -10 -16    4.81    3.10
   0 -11  16    1.38    2.23
   0 -11  15   10.92    3.72
   0 -11  14   10.38    3.43
   0 -11  13    7.24    2.96
   0 -11  12   19.86    4.27
   0 -11  11    5.84    2.70
   0 -11  10   12.86    3.29
   0 -11   9   38.10    5.44
   0  11  -9   53.86    4.75
   0 -11   8    1.03    1.72
   0  11  -8    1.21    1.04
   0 -11   7   53.44    5.94
   0 -11   6    9.73    2.72
   0 -11   5   15.82    3.27
   0 -11   4   65.46    6.03
   0  11  -3   -0.06    1.48
   0 -11   3   -0.26    1.29
   0  11  -3    0.45    0.73
   0  11  -2   82.31    6.39
   0  11  -2   73.87    3.95
   0  11  -2   77.08    6.27
   0  11  -1   24.05    3.38
   0  11  -1   23.46    3.50
   0  11   0    2.12    1.12
   0  11   0    4.54    1.67
   0  11   1   14.48    2.57
   0  11   1   14.39    2.55
   0  11   2   11.27    2.21
   0  11   2   11.12    2.90
   0  11   2   12.84    2.49
   0  11   3    2.36    1.29
   0  11   3    4.47    1.55
   0  11   4   -0.55    1.94
   0  11   4    0.02    1.09
   0 -11  -4    1.30    1.72
   0  11   4    1.87    1.13
   0  11   4    0.49    1.39
   0  11   5   18.92    2.52
   0  11   5   21.10    2.99
   0  11   5   24.46    4.33
   0  11   5   21.26    3.10
   0 -11  -5   16.32    3.66
   0  11   6    0.79    1.19
   0  11   6    1.84    1.56
   0  11   6    1.38    1.00
   0 -11  -6    0.17    1.59
   0  11   6   -2.30    2.20
   0 -11  -7    3.85    2.25
   0  11   7    4.09    1.76
   0  11   7    3.12    1.39
   0  11   7    7.93    2.90
   0  11   8    7.34    2.46
   0 -11  -8    6.62    2.92
   0  11   8    8.17    3.14
   0  11   8    2.84    1.68
   0 -11  -9    3.36    2.13
   0  11   9   -1.75    1.86
   0 -11 -10   12.80    3.65
   0  11  10   14.95    3.42
   0 -11 -11    1.55    1.95
   0  11  11    4.08    2.03
   0 -11 -12    1.99    2.20
   0  11  12    2.97    2.05
   0 -11 -13    6.46    3.16
   0 -11 -14    4.41    2.61
   0 -11 -15    0.58    1.77
   0 -12  15   12.19    3.95
   0 -12  14    9.77    3.86
   0 -12  13   76.67    8.58
   0 -12  12    2.29    2.32
   0 -12  11   18.80    4.48
   0 -12  10   71.55    7.81
   0 -12   9    4.09    2.57
   0 -12   8   77.00    7.63
   0 -12   7    7.50    2.58
   0 -12   6   60.58    6.43
   0 -12   5   27.68    4.25
   0  12  -4    7.30    2.41
   0  12  -4    4.87    1.26
   0 -12   4   11.29    2.84
   0  12  -3   12.19    3.00
   0  12  -3   17.87    2.10
   0 -12   3   17.88    3.34
   0  12  -2   49.33    5.35
   0  12  -1   -0.41    1.24
   0  12   0   62.28    5.75
   0  12   0   58.60    5.30
   0  12   1   18.07    3.86
   0  12   1   22.41    3.49
   0  12   1   25.75    3.47
   0  12   2   16.94    3.70
   0  12   2   23.42    3.24
   0  12   2   20.13    3.21
   0  12   3    1.79    2.10
   0  12   3    4.50    1.28
   0  12   3    3.30    1.17
   0  12   4   13.38    3.51
   0  12   4    7.47    1.84
   0  12   4    6.81    1.79
   0  12   4    7.29    1.83
   0  12   5    0.88    1.22
   0  12   5    4.18    1.79
   0 -12  -5   -0.12    2.07
   0  12   5    1.79    1.81
   0  12   6    0.48    1.67
   0  12   6    0.47    1.29
   0  12   6    0.63    1.27
   0 -12  -6    0.73    1.90
   0  12   7    1.33    1.28
   0 -12  -7   -3.17    2.29
   0  12   7    0.06    1.17
   0  12   7   -2.31    2.15
   0  12   8    4.47    2.28
   0 -12  -8    4.86    2.47
   0  12   8    3.41    1.74
   0  12   9   12.56    3.09
   0 -12  -9    8.20    3.05
   0  12  10    7.64    2.59
   0 -12 -10    6.78    3.20
   0 -12 -11    6.76    3.22
   0  12  11    2.75    1.44
   0 -12 -12    4.64    2.71
   0 -12 -13   -1.89    2.38
   0 -12 -14    5.82    2.86
   0 -13  13    4.81    2.58
   0 -13  12   15.86    4.28
   0 -13  11   20.43    4.42
   0 -13  10    9.73    3.57
   0 -13   9   38.76    5.74
   0 -13   8    3.09    2.42
   0 -13   7   49.86    6.22
   0 -13   6    9.25    2.91
   0  13  -5    0.09    0.72
   0 -13   5   -1.76    1.77
   0  13  -5    0.68    1.61
   0  13  -4   67.34    3.99
   0 -13   4   64.78    6.51
   0  13  -4   63.70    6.63
   0  13  -3    3.67    2.10
   0  13  -2    7.97    2.23
   0  13  -1    4.26    1.99
   0  13   0    7.59    2.28
   0  13   0    9.25    3.05
   0  13   1   -1.88    1.67
   0  13   1   -0.31    2.19
   0  13   2    6.08    2.20
   0  13   2    1.51    2.00
   0  13   2    4.62    1.33
   0  13   3   -0.52    0.83
   0  13   3   -0.45    2.60
   0  13   3   -0.32    1.27
   0  13   4    1.06    1.08
   0  13   4    0.55    2.42
   0  13   4    0.08    1.72
   0  13   5   -1.01    1.11
   0  13   5   -0.55    1.31
   0  13   5    2.62    2.28
   0  13   6    6.92    2.97
   0  13   6    6.18    2.04
   0 -13  -6    6.61    2.82
   0 -13  -7   -2.44    2.26
   0  13   7   -1.38    1.42
   0  13   7   -1.22    1.77
   0  13   8    3.17    2.56
   0 -13  -8    1.62    2.16
   0 -13  -9    9.19    3.33
   0 -13 -10    0.02    2.08
   0 -13 -11    3.44    2.64
   0 -13 -12    4.01    2.56
   0 -14  12    3.41    2.81
   0 -14  11    4.43    2.50
   0 -14  10   54.36    7.18
   0 -14   9    1.93    1.88
   0 -14   8   24.10    4.60
   0  14  -7   16.18    3.87
   0 -14   7    9.86    3.24
   0  14  -6   24.77    4.65
   0 -14   6   29.81    4.84
   0 -14   5   21.33    4.15
   0  14  -5   19.77    3.96
   0  14  -4   -1.23    1.63
   0  14  -3    9.21    2.79
   0  14  -2    8.36    2.53
   0  14  -1    3.30    1.99
   0  14   0    3.06    2.03
   0  14   0    3.88    1.55
   0  14   1    3.97    2.23
   0  14   1    5.34    2.09
   0  14   2    0.86    1.61
   0  14   2    1.07    2.48
   0  14   3   14.22    2.94
   0  14   3   13.90    3.85
   0  14   4   -0.51    2.38
   0  14   5   -3.02    2.52
   0  14   6   -2.06    2.54
   0  14   7    2.03    2.29
   0  14   8    2.80    2.58
   0 -14  -8    2.53    2.71
   0 -14  -9    7.20    2.90
   0 -14 -10    7.05    3.35
   0 -15  11   18.15    4.62
   0 -15  10    2.98    2.03
   0 -15   9    7.29    2.93
   0 -15   8    9.08    3.41
   0  15  -8    5.19    2.95
   0 -15   7    8.35    3.17
   0  15  -7    4.92    3.00
   0  15  -6   13.41    3.63
   0  15  -5   -0.38    1.70
   0  15  -4   12.48    3.46
   0  15  -3   -0.84    1.44
   0  15  -2   11.51    3.02
   0  15  -1    5.02    1.71
   0  15  -1    8.03    3.08
   0  15   0   -1.60    1.64
   0  15   0    1.33    2.13
   0  15   1   -1.43    1.72
   0  15   1    0.32    2.80
   0  15   2   -1.92    2.20
   0  15   3   -0.09    2.42
   0  15   4    4.33    2.82
   0  15   5    1.42    2.82
   0  15   6    5.96    3.58
   0  15   7    1.56    2.62
   0  15   8    7.41    3.20
   0  16 -10   21.37    5.37
   0  16  -9    8.28    3.61
   0 -16   9    9.36    3.26
   0  16  -8    9.26    3.57
   0 -16   8    3.81    2.55
   0  16  -7   10.89    3.54
   0  16  -6    1.58    2.36
   0  16  -5    5.80    2.48
   0  16  -4    0.16    1.50
   0  16  -3   14.90    4.71
   0  16  -3    6.84    2.85
   0  16  -2    0.58    2.02
   0  16  -2    6.25    2.49
   0  16  -1   -2.44    2.30
   0  16   0   -0.23    2.32
   0  16   1    2.63    2.85
   0  16   2   -4.72    3.24
   0  16   3   -1.46    2.34
   0  17  -8    2.49    2.33
   0  17  -7   -1.74    2.24
   0  17  -6   17.80    4.38
   0  17  -5   -2.27    2.12
  -1  17  -6    4.10    2.83
  -1  17  -7   -3.68    3.12
   1 -17   7    4.18    2.19
   1 -17   8    1.02    1.94
  -1  17  -8   -6.43    2.93
  -1  17  -9   -0.29    1.85
  -1  16   5   31.40    6.05
  -1  16   4    1.98    2.94
  -1  16   3   22.90    5.04
  -1  16   2    2.94    2.84
  -1  16   1   16.44    4.38
  -1  16   0    2.05    3.13
  -1  16  -1   -1.38    3.03
  -1  16  -2   31.48    5.82
  -1  16  -2   33.31    4.98
  -1  16  -3   -4.09    3.23
  -1  16  -3    0.69    1.48
  -1  16  -4    8.87    3.90
  -1  16  -4    5.63    2.37
  -1  16  -5   12.37    3.22
  -1  16  -5   10.35    3.65
   1 -16   6    2.74    2.57
  -1  16  -6    6.52    2.85
  -1  16  -7   15.69    4.09
   1 -16   7   16.35    3.89
   1 -16   8   -3.70    2.33
   1 -16   9   -3.60    2.54
  -1  15   7    2.10    2.72
  -1  15   6   20.90    4.89
  -1  15   5    4.83    2.97
  -1  15   4   40.57    6.54
  -1  15   3   10.06    3.57
  -1  15   2   18.47    4.57
  -1  15   1   29.82    5.71
  -1  15   0   10.67    3.06
  -1  15   0    4.39    2.83
  -1  15  -1   21.41    3.74
  -1  15  -1   15.56    4.07
  -1  15  -2    6.68    2.30
  -1  15  -2    6.45    2.89
  -1  15  -3    8.58    2.64
  -1  15  -3    5.13    3.14
  -1  15  -4    5.45    2.34
  -1  15  -4    0.47    3.41
   1 -15   4    3.88    2.09
  -1  15  -5   10.51    3.39
   1 -15   5    9.92    2.92
   1 -15   6    9.71    2.90
  -1  15  -6   14.09    3.55
   1 -15   7   -1.18    1.84
   1 -15   8   -3.44    2.23
   1 -15   9    4.26    2.74
   1 -15  10    0.54    1.63
   1 -15  11    1.70    2.17
   1 -14 -10    5.96    3.23
   1 -14  -9   -4.17    2.69
   1 -14  -8   24.90    5.14
  -1  14   7   17.85    4.60
   1 -14  -7   23.46    5.10
  -1  14   6    9.23    3.32
   1 -14  -6    7.03    2.47
  -1  14   5   41.54    4.60
  -1  14   5   45.89    6.61
  -1  14   4   23.10    4.85
  -1  14   3   22.50    3.24
  -1  14   3   16.27    4.05
  -1  14   2   20.67    4.79
  -1  14   2   25.91    3.57
  -1  14   1    5.22    2.04
  -1  14   1    5.39    2.94
  -1  14   0   18.02    3.33
  -1  14   0   31.15    5.55
  -1  14  -1    3.85    2.88
  -1  14  -1   -0.22    1.46
  -1  14  -2   10.88    3.63
  -1  14  -2    7.81    2.23
  -1  14  -2    8.23    1.77
  -1  14  -3   26.76    3.09
   1 -14   3   22.38    3.97
  -1  14  -3   29.65    4.47
  -1  14  -4    1.32    1.07
   1 -14   4   -0.93    1.85
  -1  14  -4    0.56    1.37
  -1  14  -5   19.98    2.83
   1 -14   5   20.98    4.07
   1 -14   6    3.55    2.36
   1 -14   7    7.82    2.92
   1 -14   8   -2.68    2.49
   1 -14   9    0.16    1.68
   1 -14  10    1.06    2.12
   1 -14  11    4.00    2.71
   1 -14  12   -2.79    2.14
   1 -13 -12    2.94    2.46
  -1  13  12    0.67    1.69
   1 -13 -11    3.20    1.75
  -1  13  11    8.39    2.52
  -1  13  10    2.26    1.70
   1 -13 -10    1.87    1.83
   1 -13  -9    1.66    2.13
  -1  13   9    2.65    1.86
   1 -13  -8    7.06    2.37
  -1  13   8    7.92    2.50
  -1  13   7   14.90    4.10
  -1  13   7    8.87    2.47
   1 -13  -7    8.19    3.25
  -1  13   6   70.38    6.02
  -1  13   6   80.73    8.19
   1 -13  -6   81.67    8.52
  -1  13   5    0.44    1.06
  -1  13   5    0.45    2.06
   1 -13  -5    1.50    2.11
  -1  13   4   35.74    5.68
  -1  13   4   32.62    3.60
  -1  13   3   29.59    3.60
  -1  13   3   22.58    4.51
  -1  13   2   24.80    4.57
  -1  13   2   30.22    3.64
  -1  13   1   16.09    2.77
  -1  13   1   19.82    3.17
  -1  13   1   14.32    3.62
  -1  13   0   10.60    3.31
  -1  13   0   12.65    2.69
  -1  13   0   12.51    2.60
  -1  13  -1   69.20    7.56
  -1  13  -1   72.20    6.19
  -1  13  -2    1.88    1.10
  -1  13  -2    1.53    1.49
   1 -13   2    3.79    1.68
  -1  13  -3    6.18    2.24
  -1  13  -3    4.96    1.66
   1 -13   3    9.35    2.57
  -1  13  -4   38.00    3.75
   1 -13   4   37.84    4.93
   1 -13   5    0.84    1.29
   1 -13   6   12.40    3.06
   1 -13   7   12.39    3.35
   1 -13   8    3.18    2.24
   1 -13   9   -1.36    2.13
   1 -13  10   24.35    4.91
   1 -13  11   21.82    4.60
   1 -13  12    5.26    3.19
   1 -13  13    8.80    3.47
  -1  12  15   -8.03    3.27
  -1  12  14    6.91    2.78
   1 -12 -14    9.33    3.51
  -1  12  13    5.97    2.67
   1 -12 -13   -4.29    2.82
   1 -12 -12   33.45    5.84
  -1  12  12   27.28    4.76
   1 -12 -11   -5.33    2.88
  -1  12  11    0.34    1.51
  -1  12  10   17.46    3.51
   1 -12 -10   16.95    4.22
  -1  12   9    8.96    2.66
   1 -12  -9   10.56    3.27
  -1  12   8   20.95    3.57
   1 -12  -8   18.48    4.44
  -1  12   7   38.93    3.44
  -1  12   7   30.07    4.21
   1 -12  -7   38.89    5.86
  -1  12   7   46.93    6.38
   1 -12  -6    2.29    2.12
  -1  12   6    0.82    1.15
  -1  12   6    1.03    2.01
  -1  12   5   99.96    5.65
  -1  12   5   95.42    8.49
   1 -12  -5   94.25    8.63
  -1  12   4   27.29    3.12
   1 -12  -4   20.96    4.21
  -1  12   4   23.35    2.74
  -1  12   4   24.56    4.61
  -1  12   3   22.78    2.80
  -1  12   3   22.26    2.93
  -1  12   3   21.04    4.10
  -1  12   2   54.94    4.50
  -1  12   2   48.78    4.44
  -1  12   1   19.91    2.95
  -1  12   1   19.41    2.91
  -1  12   1   16.19    3.72
  -1  12   0    2.46    1.90
  -1  12   0    5.13    1.77
  -1  12   0    4.32    1.71
  -1  12  -1   97.50    5.58
  -1  12  -1  107.14    7.02
  -1  12  -1   96.27    6.81
  -1  12  -1  109.60    8.92
   1 -12   2   14.01    2.94
  -1  12  -2   12.21    2.79
  -1  12  -2   10.65    1.87
  -1  12  -3  112.48    6.13
   1 -12   3  140.05    8.58
   1 -12   4    0.18    1.25
   1 -12   5   58.65    6.05
   1 -12   6   13.60    3.17
   1 -12   7    3.88    1.67
   1 -12   8    0.06    1.65
   1 -12   9    1.54    1.78
   1 -12  10   -1.94    2.16
   1 -12  11    1.62    1.72
   1 -12  12    4.55    2.65
   1 -12  13    0.80    1.91
   1 -12  14    3.20    1.99
   1 -11 -15   13.15    4.01
  -1  11  15   13.62    4.06
   1 -11 -14    2.57    2.20
  -1  11  14   -4.94    2.59
  -1  11  13    6.54    3.09
   1 -11 -13    8.26    3.42
   1 -11 -12    1.13    2.05
  -1  11  12    1.34    1.80
  -1  11  11   19.28    3.85
   1 -11 -11   16.94    4.25
  -1  11  10   15.16    3.40
   1 -11 -10   13.33    3.62
   1 -11  -9    7.79    2.78
  -1  11   9    5.39    2.20
   1 -11  -8  100.57    8.80
  -1  11   8  104.18    7.68
  -1  11   7   17.37    4.33
  -1  11   7   12.17    2.78
   1 -11  -7   15.44    3.80
  -1  11   7   12.73    2.09
  -1  11   6   55.96    4.02
   1 -11  -6   56.62    6.51
  -1  11   6   63.32    3.66
  -1  11   6   56.06    6.32
  -1  11   5   50.45    3.47
  -1  11   5   44.06    3.58
  -1  11   5   48.48    5.96
   1 -11  -5   52.12    6.18
  -1  11   4    3.40    1.18
  -1  11   4    2.65    2.36
   1 -11  -4    2.66    1.94
  -1  11   4    3.43    1.43
  -1  11   3   10.46    2.71
  -1  11   3   10.87    2.06
   1 -11  -3   13.95    3.20
  -1  11   3   12.78    2.04
  -1  11   2   -0.45    2.02
  -1  11   2    1.69    1.19
  -1  11   2    1.48    1.25
  -1  11   1   77.63    5.30
  -1  11   1   72.99    6.98
  -1  11   1   83.33    5.63
  -1  11   0   -1.21    2.51
  -1  11   0    1.48    1.21
  -1  11   0    3.11    1.53
  -1  11   0    0.31    1.04
  -1  11  -1   58.91    4.29
  -1  11  -1   63.08    5.29
   1 -11   1   69.12    5.38
  -1  11  -1   65.43    5.29
  -1  11  -2   -0.63    0.87
  -1  11  -2   -0.24    1.21
   1 -11   2    1.13    1.23
  -1  11  -3    9.93    2.36
   1 -11   3   10.00    2.44
   1 -11   4   31.00    4.21
   1 -11   5    5.51    2.27
   1 -11   6    4.34    2.04
   1 -11   7   10.47    2.87
   1 -11   8    1.50    1.94
   1 -11   9   -1.96    1.92
   1 -11  10   12.58    3.50
   1 -11  11    1.61    2.07
   1 -11  12    4.35    2.75
   1 -11  13    0.16    2.04
   1 -11  14   22.00    5.09
   1 -11  15    0.02    2.28
  -1  10  16   -2.53    2.41
   1 -10 -16    4.15    3.28
  -1  10  15    4.40    2.77
   1 -10 -15    0.31    2.47
   1 -10 -14   10.03    3.43
  -1  10  14   22.61    4.81
   1 -10 -13    1.74    2.17
  -1  10  13    2.48    2.29
  -1  10  12   15.04    3.67
   1 -10 -12   13.53    3.62
  -1  10  11   16.66    3.72
   1 -10 -11   24.24    4.71
  -1  10  10   24.31    3.98
   1 -10 -10   25.64    4.57
  -1  10   9   16.36    1.54
  -1  10   9   17.28    3.34
   1 -10  -9   17.86    3.96
  -1  10   8    2.56    1.60
  -1  10   8    2.05    0.65
   1 -10  -8    4.01    2.10
  -1  10   8    4.18    0.99
  -1  10   7  138.76    4.84
   1 -10  -7  138.12    8.00
  -1  10   7  126.37    8.95
  -1  10   7  131.31    5.81
   1 -10  -7  127.45    9.32
   1 -10  -6   41.36    5.28
  -1  10   6   44.08    2.88
  -1  10   6   47.82    3.57
  -1  10   5   41.00    2.95
  -1  10   5   39.33    3.31
   1 -10  -5   44.71    5.45
  -1  10   5   35.31    4.89
  -1  10   4   83.45    4.44
  -1  10   4   92.01    5.08
   1 -10  -4   91.21    7.60
  -1  10   4   95.43    7.65
   1 -10  -3   41.73    5.29
  -1  10   3   32.35    2.96
  -1  10   3   36.66    4.76
  -1  10   3   38.12    3.38
   1 -10  -2  177.29   10.29
  -1  10   2  177.96    7.42
  -1  10   2  170.05    9.96
  -1  10   2  182.57    7.20
  -1  10   1   -1.39    2.09
  -1  10   1    0.25    1.12
  -1  10   1    1.72    1.19
  -1  10   0   38.28    3.68
  -1  10   0   40.75    3.49
  -1  10   0   42.25    5.03
  -1  10   0   47.20    4.09
  -1  10  -1   38.57    3.84
  -1  10  -1   34.46    3.71
  -1  10  -1   33.80    3.13
  -1  10  -2    1.51    0.97
   1 -10   2    2.51    1.52
  -1  10  -2    0.83    1.20
  -1  10  -3    6.73    2.01
   1 -10   3    3.62    1.43
  -1  10  -4   -0.84    1.49
   1 -10   4    2.19    1.58
   1 -10   5    1.67    1.61
   1 -10   6   19.92    3.36
   1 -10   7   -0.46    1.68
   1 -10   8    0.45    1.34
   1 -10   9    1.78    1.64
   1 -10  10   10.50    2.99
   1 -10  11    1.70    1.75
   1 -10  12    4.38    2.82
   1 -10  13    0.23    1.98
   1 -10  14    1.01    2.07
   1 -10  15   25.85    5.47
   1 -10  16   13.50    4.09
   1  -9 -17    1.28    2.74
   1  -9 -16   -0.82    2.76
  -1   9  16   -2.77    2.22
   1  -9 -15   19.13    4.83
  -1   9  15   17.34    4.18
  -1   9  14    6.41    2.87
   1  -9 -14    4.28    2.52
  -1   9  13   21.68    4.41
   1  -9 -13   24.00    4.78
   1  -9 -12    3.41    1.91
  -1   9  12    7.25    2.60
  -1   9  11   30.80    4.61
  -1   9  11   32.58    2.29
   1  -9 -11   32.53    4.97
  -1   9  10   89.18    3.61
  -1   9  10   92.84    7.59
   1  -9 -10   82.52    7.81
  -1   9  10   90.43    3.66
   1  -9 -10   84.86    4.86
  -1   9   9    2.03    0.68
   1  -9  -9    4.67    2.19
   1  -9  -9    3.73    1.06
  -1   9   9    5.55    2.30
  -1   9   9    3.30    0.76
  -1   9   8   75.39    6.28
  -1   9   8   66.07    3.18
  -1   9   8   84.00    3.49
   1  -9  -8   89.27    7.62
  -1   9   7   59.38    3.75
  -1   9   7   52.28    2.88
   1  -9  -7   56.46    5.08
  -1   9   7   59.74    5.96
   1  -9  -7   58.84    6.12
   1  -9  -6   19.43    3.00
  -1   9   6   19.83    2.29
  -1   9   6   21.87    3.85
  -1   9   6   17.16    1.71
   1  -9  -6   20.05    3.76
   1  -9  -5  108.77    7.92
  -1   9   5  103.84    7.54
  -1   9   5  117.15    4.58
  -1   9   5  110.30    5.00
   1  -9  -4   17.97    3.31
  -1   9   4   25.07    2.48
  -1   9   4   27.98    4.03
  -1   9   4   19.74    2.06
  -1   9   3  160.18    9.22
  -1   9   3  148.56    6.09
   1  -9  -3  151.72    9.00
  -1   9   3  136.88    5.51
  -1   9   2    8.12    2.17
   1  -9  -2    8.04    2.43
  -1   9   2    8.10    1.69
  -1   9   2    7.61    1.52
  -1   9   1   81.94    4.80
  -1   9   1   93.23    6.95
  -1   9   1   84.43    4.87
  -1   9   1   94.99    6.99
   1  -9  -1   79.64    6.49
  -1   9   1   85.78    5.01
  -1   9   0    3.41    1.09
  -1   9   0    4.79    1.39
  -1   9   0    3.87    1.26
   1  -9   0    2.21    1.01
  -1   9   0    4.14    1.56
  -1   9  -1   39.88    4.57
  -1   9  -1   35.18    3.11
  -1   9  -1   29.95    3.29
  -1   9  -2   -0.36    1.23
  -1   9  -2   -0.30    1.17
  -1   9  -3    0.80    1.03
  -1   9  -4   27.20    3.51
   1  -9   4   28.50    3.66
   1  -9   5    0.75    1.21
  -1   9  -5   -0.19    1.25
   1  -9   6   83.11    6.67
   1  -9   7    1.23    1.55
   1  -9   8   16.42    3.43
   1  -9   9    1.82    1.52
   1  -9  10   14.08    3.16
   1  -9  11   -1.21    2.12
   1  -9  12   83.35    8.13
   1  -9  13   -1.35    2.11
   1  -9  14   -0.39    2.04
   1  -9  15   27.42    5.27
   1  -9  16    3.01    2.57
   1  -9  17   36.06    6.15
   1  -8 -18    1.37    2.54
   1  -8 -17   -0.63    2.14
   1  -8 -16    4.61    2.83
  -1   8  16    1.79    2.03
   1  -8 -15   -2.39    2.50
  -1   8  15   -3.72    3.02
   1  -8 -14   39.99    6.03
  -1   8  14   36.63    5.79
  -1   8  13    8.78    3.11
   1  -8 -13    7.87    2.92
  -1   8  12   47.45    5.89
  -1   8  12   54.04    3.35
   1  -8 -12   49.34    6.20
   1  -8 -11   17.15    3.74
  -1   8  11   25.12    4.26
  -1   8  11   25.45    2.23
   1  -8 -11   23.08    2.77
   1  -8 -10    2.26    1.00
   1  -8 -10    2.91    2.08
  -1   8  10    3.57    1.92
  -1   8  10    2.07    0.76
   1  -8  -9   80.82    7.16
  -1   8   9   84.31    3.61
  -1   8   9   82.43    3.53
   1  -8  -9   79.59    4.47
  -1   8   9   87.50    6.92
  -1   8   8    4.52    0.85
   1  -8  -8    2.32    1.16
   1  -8  -8    2.11    0.95
  -1   8   8    2.36    0.70
  -1   8   8    1.75    1.40
   1  -8  -8    2.34    1.56
   1  -8  -7   57.92    5.83
  -1   8   7   59.04    2.86
   1  -8  -7   63.77    5.24
  -1   8   7   66.54    3.14
   1  -8  -7   55.63    3.44
  -1   8   6  228.49    6.77
  -1   8   6  213.44   10.25
  -1   8   6  219.77    5.54
   1  -8  -6  225.06    9.30
   1  -8  -6  235.45   11.27
  -1   8   5   16.99    3.35
   1  -8  -5   12.67    2.81
  -1   8   5   14.80    1.82
  -1   8   5   15.66    3.11
  -1   8   5   13.41    1.50
  -1   8   4  232.26   10.37
  -1   8   4  226.21    6.72
  -1   8   4  238.53   10.89
   1  -8  -4  210.60   10.19
  -1   8   3  143.97    8.33
  -1   8   3  133.52    5.39
  -1   8   3  142.76    5.14
  -1   8   3  143.12    8.16
   1  -8  -3  136.57    8.11
  -1   8   2  304.64   11.80
  -1   8   2  297.33    7.86
  -1   8   2  316.83    8.53
   1  -8  -2  283.73   11.48
  -1   8   1  141.28    5.80
   1  -8  -1  144.53    5.87
  -1   8   1  145.79    6.09
  -1   8   1  146.42    6.08
   1  -8  -1  134.79    7.93
  -1   8   0    8.66    1.71
  -1   8   0    5.88    1.34
   1  -8   0    4.66    1.35
  -1   8  -1   19.68    2.49
   1  -8   1   19.39    2.53
  -1   8  -2    0.05    0.88
  -1   8  -3   32.15    3.52
  -1   8  -3   25.85    3.54
  -1   8  -4    9.89    2.15
  -1   8  -4   10.28    2.21
  -1   8  -5   -0.12    1.37
   1  -8   5   -1.29    1.58
  -1   8  -5   -0.34    1.03
   1  -8   6   26.23    3.68
  -1   8  -6   25.61    3.62
   1  -8   7   35.49    4.40
   1  -8   8   21.87    3.47
   1  -8   9    1.39    1.97
   1  -8  10    2.65    2.06
   1  -8  11   -0.45    1.44
   1  -8  12    7.25    2.76
   1  -8  13   71.17    7.63
   1  -8  14   38.44    5.88
   1  -8  15   64.79    7.91
   1  -8  16   28.67    5.39
   1  -8  17    0.40    2.54
   1  -8  18   12.96    4.46
   1  -7 -19    2.22    2.06
   1  -7 -18    2.19    2.44
   1  -7 -17    7.15    3.14
  -1   7  16   -5.80    2.83
   1  -7 -16    3.39    3.10
  -1   7  15   52.18    6.78
   1  -7 -15   40.50    6.11
   1  -7 -14   26.85    4.96
  -1   7  14   22.49    4.53
  -1   7  14   29.12    2.99
   1  -7 -13   28.31    5.01
  -1   7  13   29.02    4.74
  -1   7  13   23.63    2.66
  -1   7  12   72.57    4.17
   1  -7 -12   62.15    4.70
  -1   7  12   76.69    7.11
   1  -7 -12   62.48    6.75
  -1   7  11   22.72    2.28
   1  -7 -11   25.18    4.31
  -1   7  11   23.04    3.92
   1  -7 -11   19.53    2.56
   1  -7 -10  124.44    8.84
   1  -7 -10  119.56    5.79
  -1   7  10  130.80    8.56
  -1   7  10  117.87    4.70
  -1   7   9    2.84    1.78
   1  -7  -9    1.43    0.78
  -1   7   9    2.11    0.80
   1  -7  -9   -0.60    1.54
  -1   7   8  100.55    6.82
   1  -7  -8  102.37    6.76
   1  -7  -8   89.72    4.46
  -1   7   8   90.12    3.61
   1  -7  -8   86.34    6.89
  -1   7   7   53.93    2.70
   1  -7  -7   45.54    4.94
  -1   7   7   58.13    5.82
   1  -7  -7   47.42    4.40
  -1   7   7   50.10    2.53
   1  -7  -7   51.21    3.20
  -1   7   6   54.01    5.32
  -1   7   6   46.87    2.38
   1  -7  -6   40.76    4.56
  -1   7   6   48.88    3.03
   1  -7  -6   39.91    2.67
  -1   7   5  171.25    5.32
  -1   7   5  176.42    9.16
  -1   7   5  156.35    4.36
   1  -7  -5  150.95    8.30
   1  -7  -4   53.04    3.99
  -1   7   4   47.45    4.76
  -1   7   4   49.56    2.90
  -1   7   4   49.20    2.57
   1  -7  -4   52.93    4.88
  -1   7   3  229.81    5.88
   1  -7  -3  235.98    9.90
  -1   7   3  235.80    6.39
  -1   7   2  342.77    8.00
   1  -7  -2  334.91   11.58
  -1   7   2  334.49    7.65
  -1   7   2  329.19    8.97
  -1   7   1   58.19    3.70
  -1   7   1   63.21    3.57
   1  -7  -1   71.02    5.35
   1  -7  -1   63.85    3.62
  -1   7   1   61.07    3.61
   1  -7   0  131.61    5.55
  -1   7   0  136.29    5.44
  -1   7   0  132.88    5.53
   1  -7   0  145.98    7.57
   1  -7   1   -0.61    0.94
  -1   7  -1   -0.45    1.05
  -1   7  -2   15.32    2.24
   1  -7   2   13.21    2.10
  -1   7  -3    1.49    1.50
  -1   7  -4  196.60    8.42
  -1   7  -4  205.27    9.16
  -1   7  -5    3.50    1.47
  -1   7  -6    3.05    1.68
   1  -7   6    0.98    1.25
  -1   7  -7   43.22    4.61
   1  -7   7   43.27    4.59
   1  -7   8   10.60    2.47
   1  -7   9   18.88    3.50
  -1   7 -10   45.10    4.83
   1  -7  10   49.74    5.59
   1  -7  11   13.84    3.47
   1  -7  12   92.13    8.07
   1  -7  13    1.80    2.45
   1  -7  14   -0.65    1.45
   1  -7  15   50.82    6.74
   1  -7  16    3.14    2.37
   1  -7  17   42.88    6.58
   1  -7  18    9.16    3.55
   1  -6 -20   -1.63    2.37
   1  -6 -19    4.78    3.28
   1  -6 -18    7.54    3.63
   1  -6 -17    9.55    3.82
  -1   6  16   22.09    4.62
   1  -6 -16   17.35    4.26
   1  -6 -15    5.47    2.46
  -1   6  15    4.79    1.56
  -1   6  15    3.36    2.13
  -1   6  14   30.02    3.25
  -1   6  14   23.83    4.42
   1  -6 -14   25.82    4.48
   1  -6 -13   14.16    3.75
  -1   6  13    4.07    2.17
   1  -6 -13    8.08    1.84
  -1   6  13   10.03    1.79
   1  -6 -12   24.94    4.37
  -1   6  12   32.44    4.83
  -1   6  12   26.34    2.68
   1  -6 -12   23.61    3.01
  -1   6  11   81.64    7.05
   1  -6 -11   77.46    7.05
   1  -6 -11   86.51    5.31
  -1   6  11   87.80    4.51
   1  -6 -10    0.74    0.82
   1  -6 -10   -0.83    1.94
  -1   6  10   -1.07    0.78
  -1   6  10   -0.31    1.16
  -1   6   9   32.33    4.17
   1  -6  -9   34.25    4.56
   1  -6  -9   33.35    2.94
  -1   6   9   29.56    2.32
  -1   6   8   25.64    2.02
   1  -6  -8   24.66    2.37
  -1   6   8   23.90    3.39
   1  -6  -8   22.97    3.46
   1  -6  -7   50.00    3.05
  -1   6   7   50.16    2.53
   1  -6  -7   47.04    4.77
  -1   6   7   54.51    5.47
  -1   6   6  171.40    8.93
  -1   6   6  153.64    4.12
   1  -6  -6  149.11    8.10
   1  -6  -6  156.88    4.96
  -1   6   5  207.43    4.50
   1  -6  -5  218.55    8.19
   1  -6  -5  216.47    9.33
  -1   6   5  233.51    5.73
   1  -6  -5  208.99    5.44
   1  -6  -4  331.96   11.10
  -1   6   4  338.11    5.86
  -1   6   4  335.15    6.64
   1  -6  -4  337.77    9.59
  -1   6   3  201.76    5.21
   1  -6  -3  197.00    8.39
  -1   6   3  205.06    4.87
   1  -6  -3  202.94    7.09
  -1   6   2   51.88    2.72
   1  -6  -2   48.62    4.15
  -1   6   2   52.96    2.84
  -1   6   2   53.27    3.48
   1  -6  -1  167.51    5.24
   1  -6  -1  171.59    7.58
  -1   6   1  168.67    5.25
  -1   6   1  178.95    5.47
  -1   6   1  169.36    5.90
  -1   6   0  259.65    7.04
   1  -6   0  263.34    9.32
   1  -6   0  274.84    7.27
   1  -6   1  384.32    9.36
  -1   6  -1  385.74    9.22
  -1   6  -2    7.13    1.56
   1  -6   2    8.43    1.69
   1  -6   3  264.43    8.79
  -1   6  -3  272.14    8.91
  -1   6  -3  269.50    9.57
  -1   6  -4    2.87    1.53
  -1   6  -5    0.75    1.12
  -1   6  -6  115.95    6.91
  -1   6  -7    0.33    1.40
  -1   6  -8   62.32    5.54
   1  -6   8   57.40    5.35
   1  -6   9  173.74    9.58
  -1   6 -10    1.89    1.54
   1  -6  10    1.48    1.46
   1  -6  11   72.93    6.74
   1  -6  12   82.79    7.52
   1  -6  13   88.05    7.93
   1  -6  14    4.34    2.50
   1  -6  15   20.15    4.31
   1  -6  16   16.56    4.24
   1  -6  17    6.97    3.27
   1  -6  18   10.32    3.81
   1  -6  19    9.51    3.54
   1  -5 -20   -4.69    2.84
   1  -5 -19   -0.86    2.17
   1  -5 -18    3.29    2.58
   1  -5 -17   14.35    4.23
  -1   5  16    1.04    2.47
  -1   5  16    3.18    1.47
   1  -5 -16    2.70    2.08
   1  -5 -15   38.56    5.55
  -1   5  15   32.49    5.28
  -1   5  15   34.73    3.74
   1  -5 -14   76.66    7.52
  -1   5  14   75.51    7.57
   1  -5 -14   76.77    5.91
   1  -5 -14   75.69    5.81
  -1   5  14   79.24    5.37
   1  -5 -13   45.11    4.44
   1  -5 -13   44.80    4.42
  -1   5  13   51.62    6.11
  -1   5  13   49.57    4.03
   1  -5 -13   41.22    5.42
   1  -5 -12    9.39    2.09
  -1   5  12   14.68    3.21
   1  -5 -12   11.15    3.06
   1  -5 -12   12.74    2.32
  -1   5  12   10.67    1.92
  -1   5  11    9.34    1.72
   1  -5 -11    6.65    1.92
  -1   5  11   14.81    3.34
   1  -5 -11    9.99    1.95
   1  -5 -11   16.36    3.64
  -1   5  10  155.81    9.08
   1  -5 -10  148.62    6.56
   1  -5 -10  146.07    8.95
   1  -5 -10  145.68    7.40
  -1   5  10  147.01    5.75
  -1   5   9   29.03    3.87
   1  -5  -9   23.87    2.48
   1  -5  -9   21.28    2.88
   1  -5  -9   22.50    3.77
  -1   5   9   22.98    2.17
  -1   5   8   37.04    2.42
  -1   5   8   33.08    3.85
   1  -5  -8   31.47    3.37
   1  -5  -8   35.08    4.16
   1  -5  -8   29.93    2.62
   1  -5  -7  388.55   12.82
   1  -5  -7  370.18    8.20
   1  -5  -7  392.89   11.30
  -1   5   7  382.03    6.89
   1  -5  -6  103.14    6.38
   1  -5  -6   91.25    5.37
   1  -5  -6   84.44    3.53
  -1   5   6   86.49    2.97
   1  -5  -6   89.07    5.44
  -1   5   5   92.36    5.55
   1  -5  -5   86.84    3.24
   1  -5  -5   96.56    5.94
  -1   5   5   91.78    3.35
   1  -5  -5   91.13    5.26
   1  -5  -5   87.36    5.02
  -1   5   5   86.25    2.71
   1  -5  -4   11.68    1.86
  -1   5   4   10.30    1.99
   1  -5  -4    8.45    1.91
  -1   5   4    9.30    0.89
   1  -5  -4   10.03    1.06
  -1   5   4   10.12    1.12
   1  -5  -3    6.40    1.69
   1  -5  -3    8.68    1.52
  -1   5   3    6.34    0.93
  -1   5   3    6.72    0.82
   1  -5  -2   59.61    4.23
  -1   5   2   52.28    3.27
  -1   5   2   53.65    2.42
  -1   5   2   54.48    2.38
  -1   5   1   87.99    4.00
   1  -5  -1   89.84    5.04
  -1   5   1   89.64    3.40
   1  -5  -1   87.71    3.37
  -1   5   0    1.90    0.70
   1  -5   0    0.68    0.68
   1  -5   0    1.85    1.24
  -1   5  -1    4.68    1.18
   1  -5   1    3.81    1.06
   1  -5   2    4.98    1.28
  -1   5  -2    7.21    1.46
  -1   5  -3   44.06    3.45
   1  -5   3   39.31    3.28
  -1   5  -4   10.16    1.91
  -1   5  -5    3.66    1.57
  -1   5  -6    2.36    1.28
  -1   5  -7   45.57    4.44
  -1   5  -8   93.25    6.56
  -1   5  -9   -0.12    1.41
  -1   5  -9    0.21    1.13
   1  -5   9    0.12    1.20
   1  -5  10   46.43    5.11
  -1   5 -10   45.26    4.78
   1  -5  11   11.68    2.94
   1  -5  12   79.25    7.10
   1  -5  13  141.47    9.85
   1  -5  14    8.40    2.86
   1  -5  15   83.19    8.18
   1  -5  16   14.42    3.94
   1  -5  17   54.72    7.07
   1  -5  18   18.50    4.51
   1  -5  19    3.99    2.71
   1  -4 -21   -2.35    3.40
   1  -4 -20   -5.94    3.35
   1  -4 -19   14.45    4.64
   1  -4 -18   17.31    4.73
  -1   4  17    2.71    1.90
   1  -4 -17   -0.12    2.34
  -1   4  16   31.96    3.95
  -1   4  16   21.78    4.74
   1  -4 -16   19.80    4.15
   1  -4 -15    7.91    2.02
  -1   4  15    7.35    2.52
   1  -4 -15    6.23    2.11
  -1   4  15    5.30    1.81
   1  -4 -15    3.44    2.35
   1  -4 -14   42.06    4.19
   1  -4 -14   44.60    5.85
   1  -4 -14   45.89    4.79
  -1   4  14   42.11    4.12
  -1   4  14   48.36    6.15
   1  -4 -13  103.89    6.41
  -1   4  13  108.06    6.17
   1  -4 -13   94.46    8.04
  -1   4  13   96.59    8.05
   1  -4 -13   95.08    6.47
  -1   4  12    1.80    1.38
   1  -4 -12    0.93    1.15
   1  -4 -12    1.60    1.26
  -1   4  12    1.65    1.41
   1  -4 -12    1.73    1.91
  -1   4  11  236.25   11.39
  -1   4  11  237.06    8.06
   1  -4 -11  228.59    8.90
   1  -4 -11  236.75    9.22
   1  -4 -11  242.86   11.67
   1  -4 -10   71.72    4.97
  -1   4  10   74.70    4.31
  -1   4  10   75.96    6.31
   1  -4 -10   66.10    6.04
   1  -4 -10   71.11    4.67
   1  -4  -9   62.35    4.07
  -1   4   9   71.01    5.81
   1  -4  -9   64.92    4.65
  -1   4   9   70.73    3.85
   1  -4  -9   66.98    5.80
   1  -4  -8  103.38    4.78
   1  -4  -8   93.21    6.40
  -1   4   8  100.70    4.18
   1  -4  -8  110.83    5.86
  -1   4   8   98.54    6.33
  -1   4   7   19.23    1.70
   1  -4  -7   21.05    2.57
   1  -4  -7   19.48    1.96
   1  -4  -7   21.14    3.34
   1  -4  -6  177.57    6.93
   1  -4  -6  162.98    4.82
  -1   4   6  169.64    4.17
   1  -4  -6  168.17    7.76
   1  -4  -5  586.79   13.72
   1  -4  -5  558.11    7.85
  -1   4   5  557.76    6.41
   1  -4  -5  578.47   12.24
  -1   4   4    0.54    0.43
  -1   4   4    1.15    1.26
   1  -4  -4    0.76    0.46
   1  -4  -4   -0.12    0.95
   1  -4  -4    0.04    0.58
   1  -4  -4    0.28    0.87
  -1   4   3   37.61    1.60
   1  -4  -3   35.39    2.90
   1  -4  -3   31.85    2.53
   1  -4  -3   37.27    1.58
   1  -4  -3   32.70    3.03
  -1   4   2  124.00    2.87
  -1   4   2  129.08    4.78
   1  -4  -2  115.08    5.29
   1  -4  -2  124.75    4.61
  -1   4   2  126.52    3.04
  -1   4   1   26.66    2.13
  -1   4   1   28.54    1.66
   1  -4  -1   31.84    1.78
   1  -4  -1   28.94    2.67
   1  -4   0  284.95    6.02
   1  -4   0  284.15    7.84
  -1   4   0  286.73    5.98
   1  -4   1  582.62    9.71
  -1   4  -1  615.38    9.88
  -1   4  -2  127.77    5.24
  -1   4  -2  123.03    4.92
  -1   4  -3   17.62    2.18
  -1   4  -4   73.45    4.47
  -1   4  -5   18.99    2.52
  -1   4  -6  259.18    9.45
  -1   4  -7  248.38    9.82
  -1   4  -8   38.00    4.17
  -1   4  -9  157.83    8.36
  -1   4  -9  151.10    8.46
   1  -4   9  143.58    8.23
   1  -4  10    0.79    1.55
  -1   4 -10    1.09    1.16
  -1   4 -10    0.64    1.48
   1  -4  11   94.90    7.37
   1  -4  12  136.78    9.09
   1  -4  13    7.34    2.54
   1  -4  14   83.75    7.71
   1  -4  15    0.50    1.47
   1  -4  16  113.19    9.56
   1  -4  17   22.84    4.87
   1  -4  18    2.26    2.57
   1  -4  19   15.76    4.39
   1  -4  20    1.77    2.37
   1  -3 -21    2.71    2.70
   1  -3 -20    8.50    4.15
   1  -3 -19   14.06    4.28
  -1   3  18    4.52    2.18
   1  -3 -18    8.97    4.04
   1  -3 -17   19.57    4.86
  -1   3  17   24.24    3.83
  -1   3  16   60.94    5.55
   1  -3 -16   59.50    7.19
  -1   3  15   28.25    3.78
   1  -3 -15   20.41    4.57
   1  -3 -15   30.62    3.65
  -1   3  15   19.57    3.99
  -1   3  14   33.94    3.82
   1  -3 -14   32.30    3.70
   1  -3 -14   32.48    4.24
   1  -3 -14   33.33    5.18
  -1   3  14   25.95    4.55
  -1   3  13    1.99    1.85
   1  -3 -13    6.21    2.85
   1  -3 -13    1.98    1.35
   1  -3 -13    2.59    1.22
  -1   3  13    2.62    1.56
   1  -3 -12  236.67   11.93
  -1   3  12  231.01   11.71
   1  -3 -12  245.48    9.38
  -1   3  12  250.68    9.15
   1  -3 -12  240.31    9.97
  -1   3  11  151.35    9.04
   1  -3 -11  138.64    7.15
  -1   3  11  138.62    6.45
   1  -3 -11  127.60    8.55
   1  -3 -11  131.97    6.69
  -1   3  10   93.27    4.96
  -1   3  10   82.57    6.36
   1  -3 -10   82.22    5.20
   1  -3 -10   98.23    5.64
   1  -3 -10   84.96    6.79
   1  -3  -9   96.36    6.76
   1  -3  -9  102.58    5.58
   1  -3  -9   99.64    5.28
  -1   3   9  103.33    4.83
  -1   3   9   98.96    6.61
  -1   3   8  148.85    5.32
  -1   3   8  151.06    7.62
   1  -3  -8  140.75    5.78
   1  -3  -8  146.10    7.88
   1  -3  -8  137.57    6.22
   1  -3  -7  100.75    4.45
  -1   3   7  100.46    5.91
  -1   3   7  104.53    4.01
   1  -3  -7  100.31    6.14
   1  -3  -7  111.78    5.49
   1  -3  -6   -0.28    1.42
  -1   3   6    0.84    0.59
   1  -3  -6    0.71    0.68
   1  -3  -5   11.68    1.81
   1  -3  -5    9.35    1.84
  -1   3   5    8.70    0.92
   1  -3  -5    9.07    1.17
   1  -3  -4   19.62    2.55
   1  -3  -4   15.98    2.02
   1  -3  -4   16.49    1.13
   1  -3  -3  272.59    7.75
   1  -3  -3  266.25    7.16
   1  -3  -2   52.24    3.10
   1  -3  -2   51.38    3.26
  -1   3   2   53.07    2.86
   1  -3  -1   32.75    2.36
   1  -3  -1   39.73    2.67
  -1   3   1   38.80    2.32
  -1   3   1   36.80    1.55
   1  -3  -1   38.84    1.59
   1  -3   0  572.84    7.43
  -1   3   0  565.83    7.40
   1  -3   0  565.54    9.46
  -1   3  -1   28.55    2.04
  -1   3  -2  357.82    7.74
  -1   3  -3   61.60    3.65
  -1   3  -4   11.96    1.84
  -1   3  -5   65.16    4.35
  -1   3  -6   35.35    3.44
  -1   3  -7    3.57    1.50
  -1   3  -8   79.93    5.62
  -1   3  -8   80.54    5.72
   1  -3   8   78.97    5.67
  -1   3  -9   41.33    4.25
  -1   3  -9   35.73    4.11
   1  -3   9   38.74    4.33
  -1   3 -10   34.01    4.15
   1  -3  10   28.56    3.81
  -1   3 -10   36.79    4.36
   1  -3  11  105.85    7.52
   1  -3  12   15.26    3.24
   1  -3  13  155.66    9.79
   1  -3  14   -1.85    1.61
   1  -3  15  106.15    8.80
   1  -3  16   68.98    7.40
   1  -3  17   59.33    7.17
   1  -3  18   48.05    6.60
   1  -3  19    6.02    3.14
   1  -3  20    6.45    2.90
   1  -2 -21   11.81    4.72
   1  -2 -20    7.46    3.63
   1  -2 -19    7.26    3.50
  -1   2  19    4.48    2.43
   1  -2 -18   27.54    5.63
  -1   2  18   20.36    3.65
  -1   2  17    5.40    2.02
   1  -2 -17    8.78    4.15
  -1   2  16   30.99    4.28
   1  -2 -16   24.02    3.29
  -1   2  15   49.15    4.95
  -1   2  14   12.40    2.66
  -1   2  14   12.45    3.15
   1  -2 -14   20.41    3.60
   1  -2 -14   15.34    2.98
  -1   2  13  226.30   12.03
  -1   2  13  245.80    9.92
   1  -2 -13  238.65   10.00
  -1   2  12   52.86    4.48
  -1   2  12   41.50    5.12
   1  -2 -12   48.66    4.37
  -1   2  11  164.23    9.25
   1  -2 -11  156.97    7.32
  -1   2  11  158.48    7.13
   1  -2 -10  229.29    8.23
  -1   2  10  228.66    8.04
  -1   2  10  237.41   10.61
  -1   2   9   37.97    4.10
  -1   2   9   36.55    3.01
   1  -2  -9   39.08    3.22
   1  -2  -8  917.82   14.11
  -1   2   8  912.27   18.43
  -1   2   8  924.93   13.80
  -1   2   7  105.76    5.88
   1  -2  -7   95.47    4.19
  -1   2   7  103.56    4.25
   1  -2  -6   59.34    2.93
  -1   2   6   56.32    2.80
   1  -2  -5   25.23    3.01
  -1   2   5   23.61    1.57
   1  -2  -5   22.48    1.60
   1  -2  -4    5.04    1.72
   1  -2  -4    3.14    0.61
  -1   2   4    2.78    0.55
   1  -2  -3  179.59    5.81
   1  -2  -2  689.08    9.81
   1  -2  -2  679.52   10.02
  -1   2   2  691.42    9.39
  -1   2   1  150.38    4.02
   1  -2  -1  161.76    4.44
   1  -2  -1  148.10    4.31
   1  -2   0   16.05    1.38
  -1   2   0   15.11    1.14
   1  -2   0   15.14    1.36
  -1   2  -1   18.40    1.51
  -1   2  -1   20.37    1.52
  -1   2  -1   21.68    1.53
  -1   2  -2  323.59    6.96
  -1   2  -3  388.01    8.41
  -1   2  -4   50.66    3.43
  -1   2  -5   41.65    3.38
  -1   2  -6  130.96    6.34
   1  -2   7  627.30   14.47
  -1   2  -7  636.20   14.60
   1  -2   8    1.61    1.37
  -1   2  -8    2.67    1.63
  -1   2  -9   79.81    5.89
  -1   2  -9   86.96    6.16
   1  -2   9   81.34    5.98
  -1   2 -10    4.11    1.98
   1  -2  10    7.07    2.21
  -1   2 -10    2.41    1.26
  -1   2 -11   21.81    3.59
   1  -2  11   25.24    3.80
   1  -2  12  149.09    9.05
   1  -2  13   -0.23    1.66
   1  -2  14  109.18    8.40
   1  -2  15   21.15    4.02
   1  -2  16   47.04    5.98
   1  -2  17   43.71    6.07
   1  -2  18   -1.04    2.25
   1  -2  19   31.02    5.38
   1  -2  20    0.62    2.49
   1  -2  21    3.53    2.77
   1  -1 -21    2.68    3.22
   1  -1 -20   11.74    4.67
  -1   1  20    6.91    2.93
  -1   1  19   17.19    3.77
  -1   1  18    2.86    1.93
  -1   1  17   16.86    3.34
  -1   1  16    5.51    2.21
  -1   1  15    1.96    1.82
  -1   1  14    8.02    2.63
  -1   1  14    2.99    1.62
   1  -1 -14    5.95    2.07
   1  -1 -13   11.94    2.64
  -1   1  13    9.08    2.31
  -1   1  13   10.27    2.96
   1  -1 -12  184.03    8.60
  -1   1  12  198.38    8.76
  -1   1  12  181.40   10.16
   1  -1 -11  134.55    7.01
  -1   1  11  133.27    8.36
  -1   1  11  132.62    6.77
   1  -1 -10   35.01    3.45
  -1   1  10   27.66    3.76
  -1   1  10   34.98    3.38
  -1   1   9  172.96    6.84
  -1   1   9  164.81    8.18
   1  -1  -9  172.10    6.90
   1  -1  -8    1.31    0.84
  -1   1   8    3.35    1.20
  -1   1   8    4.66    1.60
   1  -1  -7  255.97    7.17
  -1   1   7  246.60    6.93
  -1   1   7  235.92    8.64
   1  -1  -6   72.32    3.49
  -1   1   6   76.14    3.53
  -1   1   6   74.19    4.47
   1  -1  -5    3.80    0.95
  -1   1   5    4.13    0.91
  -1   1   4  110.80    3.20
   1  -1  -4  112.25    3.23
   1  -1  -3   24.58    1.27
  -1   1   3   25.54    1.30
  -1   1   2    4.66    0.85
  -1   1   1   98.31    2.86
  -1   1   0  280.59    4.27
  -1   1  -1   75.84    2.79
  -1   1  -1   80.97    2.19
  -1   1  -2   78.83    3.34
  -1   1  -3  602.46   10.20
  -1   1  -4  503.87   10.27
   1  -1   5   16.36    2.33
  -1   1  -5   13.02    2.01
  -1   1  -6  469.18   11.63
   1  -1   6  473.24   11.53
  -1   1  -7   11.39    2.10
   1  -1   7   10.88    2.24
  -1   1  -8    4.96    1.63
   1  -1   8    5.52    1.70
   1  -1   9   94.35    6.21
  -1   1  -9   97.12    6.29
  -1   1 -10   64.63    5.46
  -1   1 -10   65.64    5.68
   1  -1  10   51.56    4.88
  -1   1 -11  109.10    7.43
   1  -1  11  108.21    7.26
   1  -1  12   55.25    5.58
   1  -1  13   55.33    5.68
   1  -1  14   54.25    5.85
   1  -1  15   44.74    5.47
   1  -1  16   73.10    7.27
   1  -1  17    4.20    2.27
   1  -1  18   45.02    6.17
   1  -1  19   -0.89    1.99
   1  -1  20   -4.92    2.97
   1  -1  21    2.68    2.65
  -1   0  21   -4.97    2.53
  -1   0  20   22.28    4.33
  -1   0  19    2.97    2.06
  -1   0  18   26.41    4.42
  -1   0  17   38.11    5.17
  -1   0  16   49.88    5.54
  -1   0  15   39.38    4.77
   1   0 -14    6.65    2.24
  -1   0  14    9.24    2.66
   1   0 -13   84.49    6.41
  -1   0  13   74.81    6.75
  -1   0  13   84.63    6.27
   1   0 -12  149.74    8.09
  -1   0  12  141.58    7.69
  -1   0  12  133.97    8.64
  -1   0  11   -1.08    1.67
   1   0 -11    0.44    1.28
  -1   0  11    1.00    1.29
   1   0 -10   76.08    5.15
  -1   0  10   81.44    5.29
  -1   0  10   74.38    5.80
  -1   0   9    3.48    1.52
  -1   0   9    2.52    1.51
   1   0  -9    2.68    1.20
   1   0  -8  227.37    7.80
  -1   0   8  227.70    7.72
  -1   0   8  217.46    8.68
  -1   0   7  115.07    5.92
   1   0  -7  120.80    5.31
  -1   0   7  120.28    5.25
   1   0  -6  187.52    5.99
  -1   0   6  183.15    6.75
  -1   0   6  185.77    5.96
   1   0  -5  284.09    6.66
  -1   0   5  279.12    7.64
  -1   0   5  288.16    6.76
  -1   0   4    2.05    0.90
   1   0  -4    3.04    0.83
   1   0  -3 1076.52   10.23
  -1   0   3 1104.70   10.34
   1   0  -2    2.68    0.56
  -1   0   1   81.91    2.41
  -1   0   0   71.86    2.42
  -1   0  -1  473.31    7.00
  -1   0  -2  186.14    5.02
  -1   0  -3    5.53    1.30
   1   0   4 1310.23   16.14
  -1   0  -4 1331.32   16.74
  -1   0  -5  211.04    7.01
  -1   0  -5  213.91    7.31
   1   0   5  208.52    7.05
  -1   0  -6   59.83    4.10
   1   0   6   54.30    3.93
   1   0   7  856.23   16.08
  -1   0  -7  879.02   16.48
   1   0   8   37.62    3.79
  -1   0  -8   40.88    3.90
   1   0   9    6.70    2.01
  -1   0  -9    7.72    2.20
  -1   0 -10  106.28    7.15
  -1   0 -10  111.95    7.41
   1   0  10  104.31    6.74
  -1   0 -10  103.11    6.77
   1   0  11   14.03    2.89
  -1   0 -11   10.55    2.46
   1   0  12  154.02    8.88
   1   0  13   65.93    6.09
   1   0  14   91.88    7.47
  -1   0 -14   87.63    4.03
   1   0  15   48.75    5.66
   1   0  16   -1.17    1.92
   1   0  17   47.87    6.04
   1   0  18   18.23    3.92
  -1   0 -19   21.81    4.97
   1   0  19   17.92    4.33
   1   0  20    6.67    2.78
  -1   0 -20   11.75    4.05
   1   0  21    3.89    2.67
  -1  -1  22   -0.02    1.94
  -1  -1  21   15.48    3.92
  -1  -1  20    0.96    1.80
  -1  -1  19   10.63    3.05
  -1  -1  18    7.86    2.85
  -1  -1  17    3.57    2.20
  -1  -1  16   25.74    4.31
  -1  -1  15   -0.50    1.47
  -1  -1  14   39.77    4.66
  -1  -1  13   18.63    3.23
   1   1 -13   26.13    3.76
  -1  -1  12    4.60    1.82
   1   1 -12    3.19    1.71
  -1  -1  11   31.86    4.09
   1   1 -11   34.42    3.93
  -1  -1  11   37.31    3.99
  -1  -1  10   37.00    3.77
   1   1 -10   43.26    4.14
  -1  -1  10   40.95    4.38
  -1  -1   9  254.51    9.88
   1   1  -9  250.09    9.10
  -1  -1   9  252.38    9.06
   1   1  -8  160.58    6.91
  -1  -1   8  146.94    7.01
  -1  -1   8  156.68    6.81
  -1  -1   7    6.86    1.63
   1   1  -7    9.94    1.80
  -1  -1   7    6.98    1.59
  -1  -1   6  105.63    5.08
   1   1  -6  108.65    4.95
  -1  -1   6  103.56    4.84
  -1  -1   5  363.26    8.31
  -1  -1   5  362.97    8.41
   1   1  -5  353.29    8.17
  -1  -1   4    7.28    1.30
   1   1  -4    6.30    1.14
  -1  -1   4    9.25    1.37
   1   1  -3   73.62    3.16
   1   1  -2    2.74    0.73
  -1  -1   1    7.55    0.99
  -1  -1   0  295.03    5.68
  -1  -1  -1   37.59    1.46
  -1  -1  -1   33.58    2.10
  -1  -1  -2  109.76    4.01
  -1  -1  -2  119.45    3.04
   1   1   2  114.35    3.08
   1   1   3   87.26    2.13
  -1  -1  -3   85.01    3.10
  -1  -1  -3   90.46    4.03
   1   1   3   89.86    4.16
  -1  -1  -4    2.49    1.14
   1   1   4    2.20    1.19
  -1  -1  -4    2.57    1.20
  -1  -1  -5  122.51    5.57
   1   1   5  128.42    5.49
   1   1   6  531.40   11.85
  -1  -1  -6  519.48    6.41
  -1  -1  -6  536.73   12.42
  -1  -1  -7   40.96    3.81
   1   1   7   42.22    3.67
  -1  -1  -7   41.96    2.00
   1   1   8  278.10    9.60
  -1  -1  -8  277.02    5.48
  -1  -1  -8  286.81   10.36
   1   1   9  267.73    9.98
  -1  -1  -9  256.85   10.30
  -1  -1  -9  267.82   10.80
  -1  -1  -9  241.39    5.47
  -1  -1 -10   46.97    2.57
  -1  -1 -10   52.06    5.16
  -1  -1 -10   55.62    5.14
   1   1  10   58.26    5.06
   1   1  11  242.51   10.45
  -1  -1 -11  242.42   11.00
  -1  -1 -11  232.40    5.89
   1   1  12  198.60    9.98
  -1  -1 -12  181.88    5.40
   1   1  13    1.43    2.04
  -1  -1 -13    0.65    0.61
  -1  -1 -14  121.40    4.51
   1   1  14  122.23    8.44
  -1  -1 -15    6.09    2.87
   1   1  15    5.17    2.14
  -1  -1 -16   70.53    7.28
   1   1  16   59.93    6.47
  -1  -1 -17   19.85    4.82
   1   1  17   11.43    3.39
  -1  -1 -18   33.63    5.59
   1   1  18   46.20    5.96
  -1  -1 -19   10.99    3.34
   1   1  19    5.83    2.90
  -1  -1 -20   -0.68    3.03
   1   1  20   -6.01    2.74
  -1  -2  22   11.17    3.49
  -1  -2  21   -4.73    2.89
  -1  -2  20   18.49    4.25
  -1  -2  19   19.54    4.23
  -1  -2  18   31.47    4.98
  -1  -2  17   88.81    7.99
  -1  -2  16    3.44    1.96
  -1  -2  15  123.31    8.78
  -1  -2  14   13.81    2.99
  -1  -2  13    3.68    1.80
   1   2 -12  172.74    9.16
  -1  -2  12  174.29    9.16
  -1  -2  11    9.10    2.28
   1   2 -11   10.57    2.35
   1   2 -10   58.46    4.90
  -1  -2  10   61.32    5.08
  -1  -2   9    5.22    1.75
   1   2  -9    3.69    1.64
   1   2  -8  107.02    5.85
   1   2  -8  100.08    5.73
  -1  -2   8   98.69    5.69
  -1  -2   8   97.61    5.75
  -1  -2   7  478.17   11.58
   1   2  -7  497.68   11.63
   1   2  -7  495.01   11.96
  -1  -2   7  479.96   11.80
   1   2  -6    9.18    1.67
  -1  -2   6   11.20    1.93
  -1  -2   6    7.69    1.54
   1   2  -6    9.55    1.72
   1   2  -5   46.20    2.97
  -1  -2   5   41.59    2.89
   1   2  -5   46.46    3.30
   1   2  -4  203.94    6.28
  -1  -2   4  201.61    5.37
  -1  -2   3    2.69    0.66
   1   2  -3    4.10    1.00
  -1  -2   2  163.27    2.86
   1   2  -2  149.59    4.75
   1   2  -1   90.65    3.55
  -1  -2   0  290.52    6.43
   1   2   1  171.00    5.15
  -1  -2  -1  169.79    4.35
  -1  -2  -1  169.55    3.65
  -1  -2  -1  161.30    4.97
   1   2   1  169.11    4.32
  -1  -2  -2   10.97    1.22
  -1  -2  -2   12.75    1.65
   1   2   2   10.44    1.29
   1   2   2   12.44    1.60
  -1  -2  -2   10.45    1.23
  -1  -2  -3  187.43    5.61
  -1  -2  -3  182.52    5.88
   1   2   3  182.56    5.95
   1   2   3  191.79    5.38
  -1  -2  -3  194.82    5.31
  -1  -2  -4   67.94    3.48
  -1  -2  -4   71.31    3.97
  -1  -2  -4   62.97    3.70
   1   2   4   75.79    2.86
   1   2   4   73.51    4.15
  -1  -2  -5   69.86    4.27
  -1  -2  -5   61.48    3.98
  -1  -2  -5   59.40    3.59
   1   2   5   57.96    3.72
  -1  -2  -6   24.52    2.81
  -1  -2  -6   19.91    2.58
  -1  -2  -6   24.72    2.58
   1   2   6   21.90    2.56
  -1  -2  -7  189.62    7.88
   1   2   7  197.19    7.63
  -1  -2  -7  185.32    7.39
  -1  -2  -8   29.88    3.40
  -1  -2  -8   28.12    3.32
   1   2   8   27.37    3.17
  -1  -2  -9  178.67    8.59
  -1  -2  -9  190.42    9.30
   1   2   9  176.14    8.02
  -1  -2  -9  156.98    7.77
   1   2  10  254.87   10.06
  -1  -2 -10  249.32   10.73
  -1  -2 -10  234.66   10.00
   1   2  11    1.34    1.51
  -1  -2 -11   -0.92    1.78
  -1  -2 -11    0.13    1.43
   1   2  12   99.54    6.95
  -1  -2 -12   98.69    7.24
   1   2  13   27.67    3.95
  -1  -2 -13   26.79    4.33
   1   2  14   39.37    4.75
  -1  -2 -14   35.04    4.85
  -1  -2 -15   79.72    7.34
   1   2  15   96.06    7.69
   1   2  16    7.64    2.74
  -1  -2 -16   10.03    3.22
   1   2  17   15.34    3.47
  -1  -2 -17   11.99    3.41
  -1  -2 -18   34.99    5.57
   1   2  18   26.92    4.62
  -1  -2 -19    2.30    2.42
   1   2  19    2.61    2.03
  -1  -2 -20    5.06    3.05
  -1  -3  22   -3.02    2.47
  -1  -3  21   31.74    5.63
  -1  -3  20    6.16    3.07
  -1  -3  19   23.55    4.67
  -1  -3  18   28.36    4.95
  -1  -3  17    9.52    3.20
  -1  -3  16   69.79    6.98
  -1  -3  15   20.37    3.84
  -1  -3  14   36.29    4.85
  -1  -3  13    4.47    2.06
  -1  -3  12   12.70    2.76
  -1  -3  11   61.36    5.45
   1   3 -11   64.47    5.66
  -1  -3  10   -0.65    1.45
   1   3 -10    0.37    1.14
   1   3 -10    1.22    1.48
   1   3  -9   30.45    3.59
  -1  -3   9   29.80    3.52
   1   3  -9   27.39    3.26
   1   3  -8  132.37    6.92
   1   3  -8  132.12    6.46
  -1  -3   8  127.88    6.85
   1   3  -7    2.01    0.92
  -1  -3   7    2.69    1.41
   1   3  -7    3.59    1.30
   1   3  -6   -0.06    0.73
   1   3  -6    2.75    1.14
   1   3  -5   11.87    1.55
   1   3  -5   11.97    1.93
   1   3  -4   12.19    1.83
   1   3  -4   15.53    1.50
   1   3  -3   23.02    1.43
   1   3  -3   20.90    2.16
   1   3  -2  289.16    7.34
   1   3  -1   82.49    3.78
   1   3  -1   77.77    3.91
   1   3   0    8.04    1.45
  -1  -3   0    7.82    1.41
   1   3   1  216.84    5.94
   1   3   1  220.92    4.30
  -1  -3  -1  215.95    6.27
   1   3   1  215.45    6.30
  -1  -3  -1  214.86    5.97
   1   3   2  289.98    6.13
   1   3   2  288.89    7.51
  -1  -3  -2  293.87    7.11
   1   3   2  298.73    7.18
  -1  -3  -2  297.19    7.52
   1   3   3   99.05    4.65
   1   3   3  100.67    4.23
   1   3   3  100.27    4.44
  -1  -3  -3   99.91    4.32
  -1  -3  -3  103.64    4.66
   1   3   4    4.59    1.46
  -1  -3  -4    5.85    1.45
   1   3   4    3.89    1.24
   1   3   4    5.40    1.09
  -1  -3  -4    3.28    1.12
   1   3   4    4.34    1.17
   1   3   5  586.19   12.45
  -1  -3  -5  586.99   12.39
   1   3   5  581.54   12.52
   1   3   5  587.90    9.73
  -1  -3  -5  582.96   11.83
  -1  -3  -6  430.13   10.82
  -1  -3  -6  429.31   11.18
   1   3   6  444.45   10.86
  -1  -3  -7  399.51   11.17
   1   3   7  402.71   10.89
  -1  -3  -7  410.48   11.55
   1   3   8    5.67    1.78
  -1  -3  -8    6.76    1.78
  -1  -3  -8    5.47    1.79
  -1  -3  -9  172.57    8.25
  -1  -3  -9  192.69    8.88
   1   3   9  194.59    8.41
   1   3  10   -0.92    1.48
  -1  -3 -10    0.17    1.53
  -1  -3 -10    0.02    1.12
  -1  -3 -11  132.94    8.02
  -1  -3 -11  133.81    8.14
   1   3  11  132.34    7.63
  -1  -3 -12   11.20    2.64
   1   3  12   13.39    2.79
  -1  -3 -13   18.84    3.61
   1   3  13   16.49    3.10
  -1  -3 -14   26.28    4.27
   1   3  14   31.30    4.36
  -1  -3 -15   -0.59    2.34
   1   3  15    1.08    1.83
   1   3  16   26.27    4.34
  -1  -3 -16   23.24    4.43
   1   3  17   18.83    3.64
  -1  -3 -17   12.56    3.44
   1   3  18   -1.52    1.91
  -1  -3 -18   -0.01    2.26
  -1  -3 -19   22.99    4.67
  -1  -4  21   11.19    3.65
  -1  -4  20   10.80    3.66
  -1  -4  19   40.00    6.21
  -1  -4  18   15.81    3.94
  -1  -4  17   84.46    8.34
  -1  -4  16    3.26    2.27
  -1  -4  15   45.34    5.68
  -1  -4  14   28.17    4.33
  -1  -4  13    5.43    2.02
  -1  -4  12   99.07    7.52
   1   4 -11    0.88    1.01
  -1  -4  11   -0.28    1.70
   1   4 -10  265.36   11.12
   1   4 -10  265.72   10.38
  -1  -4  10  253.84   10.89
   1   4  -9   91.47    6.30
   1   4  -9   93.48    5.80
  -1  -4   9   88.52    6.26
   1   4  -8   -0.21    0.87
   1   4  -8   -0.98    1.26
   1   4  -7   23.86    3.04
   1   4  -7   21.00    2.43
   1   4  -6    3.71    1.13
   1   4  -6    1.35    1.02
   1   4  -5   34.21    2.44
   1   4  -5   34.00    3.21
   1   4  -4  177.27    4.71
   1   4  -4  182.58    6.99
   1   4  -3  137.83    5.79
   1   4  -3  140.42    3.44
   1   4  -2   82.48    4.32
   1   4  -1   89.22    4.55
   1   4  -1   93.46    4.47
  -1  -4   0   26.85    2.44
   1   4   0   28.31    1.23
   1   4   0   28.21    2.52
  -1  -4   0   28.01    1.20
   1   4   0   26.86    2.38
   1   4   0   30.17    2.70
   1   4   1   48.59    3.29
  -1  -4  -1   48.91    3.36
  -1  -4  -1   51.05    3.38
   1   4   1   53.31    2.26
   1   4   1   53.36    3.50
   1   4   2   23.48    2.32
  -1  -4  -2   22.15    2.25
   1   4   2   22.93    2.46
  -1  -4  -2   23.60    2.41
   1   4   2   22.15    1.83
  -1  -4  -3    2.87    1.15
  -1  -4  -3    1.31    0.95
   1   4   3    1.15    0.73
   1   4   3    0.84    0.98
   1   4   3    2.59    1.27
   1   4   4   31.67    2.81
   1   4   4   32.51    3.00
   1   4   4   30.43    2.59
  -1  -4  -4   32.12    2.99
  -1  -4  -4   31.31    2.95
   1   4   4   29.24    2.87
  -1  -4  -5  303.07    9.27
   1   4   5  302.17    9.17
   1   4   5  302.54    8.09
  -1  -4  -5  288.69    8.97
   1   4   5  301.54    9.52
   1   4   5  287.90    9.04
   1   4   6  499.11   10.47
   1   4   6  500.50   12.49
   1   4   6  513.42   12.92
  -1  -4  -6  492.69   12.35
  -1  -4  -6  497.15   12.33
   1   4   7    1.83    1.36
   1   4   7    1.62    1.48
  -1  -4  -7    1.89    1.41
  -1  -4  -7    2.12    1.10
   1   4   8  480.44   12.61
  -1  -4  -8  458.02   13.11
  -1  -4  -8  473.37   13.40
  -1  -4  -9   12.86    2.83
  -1  -4  -9   12.63    2.51
   1   4   9   12.75    2.40
   1   4  10   50.36    4.57
  -1  -4 -10   53.30    5.04
  -1  -4 -10   40.57    4.39
   1   4  11   16.55    2.87
  -1  -4 -11   14.18    2.99
  -1  -4 -11   16.32    3.07
  -1  -4 -12    1.80    1.56
   1   4  12    4.19    1.77
  -1  -4 -13   33.81    4.68
   1   4  13   30.41    4.14
   1   4  14    0.83    1.41
  -1  -4 -14   -0.04    1.98
  -1  -4 -15   37.71    5.27
   1   4  15   32.24    4.43
  -1  -4 -16   20.26    3.97
   1   4  16   29.43    4.58
   1   4  17   17.35    3.65
  -1  -4 -17   23.55    4.46
  -1  -4 -18   13.05    3.85
  -1  -4 -19    1.58    2.17
  -1  -5  21   12.86    4.27
  -1  -5  20   16.09    4.16
  -1  -5  19    7.59    3.51
  -1  -5  18   48.61    6.48
  -1  -5  17    1.44    1.96
  -1  -5  16   58.49    6.87
  -1  -5  15   12.42    3.16
  -1  -5  14    4.67    2.53
  -1  -5  13    6.16    2.29
  -1  -5  12   31.74    4.41
   1   5 -12   26.16    3.66
   1   5 -11   32.97    3.95
  -1  -5  11   30.95    4.31
  -1  -5  10   41.22    4.69
   1   5 -10   41.82    4.14
   1   5  -9    0.43    1.01
  -1  -5   9    3.30    1.76
   1   5  -9    4.49    1.99
   1   5  -8  138.27    6.57
   1   5  -8  146.76    7.96
   1   5  -7    2.00    0.93
   1   5  -7    1.49    1.15
   1   5  -6   15.09    2.43
   1   5  -6   14.07    1.79
   1   5  -5   20.23    1.90
   1   5  -5   22.78    2.88
   1   5  -4   26.03    2.96
   1   5  -4   22.92    1.75
   1   5  -3   81.10    2.64
   1   5  -3   81.61    4.87
  -1  -5   2    6.68    1.53
   1   5  -2    5.77    1.45
   1   5  -2    4.01    1.51
   1   5  -1  142.56    6.01
   1   5  -1  153.23    6.41
   1   5   0    2.06    0.45
   1   5   0    3.09    1.23
   1   5   0    4.12    1.18
   1   5   0    1.69    0.92
   1   5   1   26.75    1.75
   1   5   1   24.78    2.64
  -1  -5  -1   26.22    1.67
   1   5   1   28.56    2.66
  -1  -5  -1   20.91    2.61
   1   5   1   31.00    2.99
  -1  -5  -1   23.90    2.49
  -1  -5  -2  517.06   12.05
   1   5   2  483.62   11.18
   1   5   2  513.73    8.68
   1   5   2  508.25   11.97
  -1  -5  -2  494.92   11.32
  -1  -5  -3   15.82    2.10
  -1  -5  -3   18.61    2.53
   1   5   3   20.71    2.53
   1   5   3   18.46    2.52
   1   5   3   17.31    1.94
   1   5   4  340.35    9.00
  -1  -5  -4  316.53    9.85
   1   5   4  325.14    9.52
   1   5   4  342.48   10.45
   1   5   4  330.05    9.46
  -1  -5  -4  318.00    9.45
   1   5   5  259.35    8.47
  -1  -5  -5  261.06    9.18
   1   5   5  248.87    8.65
   1   5   5  272.51    9.70
  -1  -5  -5  261.49    8.90
   1   5   5  251.53    8.48
   1   5   6   14.53    2.39
  -1  -5  -6   16.32    2.57
   1   5   6   15.71    2.26
   1   5   6   16.37    2.55
  -1  -5  -6   14.75    2.31
   1   5   7  303.76    9.24
  -1  -5  -7  303.88   10.41
   1   5   7  314.04   10.57
   1   5   7  306.37   10.91
  -1  -5  -7  287.89   10.48
   1   5   8   10.14    2.37
  -1  -5  -8   11.82    2.50
  -1  -5  -8   14.17    2.53
   1   5   8   13.59    2.59
   1   5   9  172.08    7.96
  -1  -5  -9  172.08    8.54
  -1  -5  -9  159.03    8.49
   1   5  10  191.38    8.66
  -1  -5 -10  173.14    9.22
  -1  -5 -10  185.48    9.23
  -1  -5 -11  132.96    8.09
  -1  -5 -11  133.10    8.46
   1   5  11  134.56    7.59
  -1  -5 -12   10.21    2.77
   1   5  12    9.80    2.58
  -1  -5 -13    1.31    1.57
   1   5  13    1.80    1.40
   1   5  14   50.99    5.32
  -1  -5 -14   59.87    6.47
   1   5  15    6.31    2.16
  -1  -5 -15   15.43    3.67
   1   5  16   -0.26    1.50
  -1  -5 -16    2.69    2.46
  -1  -5 -17   12.43    3.30
  -1  -5 -18    1.49    2.17
  -1  -6  20    3.90    2.74
  -1  -6  19   40.97    6.42
  -1  -6  18    8.48    3.39
  -1  -6  17   64.28    7.60
  -1  -6  16   42.03    6.09
  -1  -6  15    8.30    2.79
  -1  -6  14   28.90    4.70
  -1  -6  13   -0.12    1.53
   1   6 -12   55.23    5.33
  -1  -6  12   60.31    6.24
   1   6 -11   -1.12    1.45
  -1  -6  11    0.75    1.43
   1   6 -10   78.47    5.58
  -1  -6  10   67.94    6.15
  -1  -6   9  103.27    7.38
   1   6  -9  114.63    6.36
   1   6  -8    5.35    1.83
   1   6  -8    3.35    1.25
   1   6  -7   20.68    2.41
   1   6  -7   20.28    2.98
   1   6  -6    3.20    1.31
   1   6  -6    7.89    1.41
   1   6  -5   14.96    2.42
   1   6  -5   12.95    1.57
   1   6  -4   95.78    3.47
   1   6  -4  105.88    6.14
   1   6  -3   38.22    3.54
   1   6  -2  130.75    6.27
   1   6  -2  121.00    2.73
  -1  -6   2  133.99    6.41
   1   6  -2  128.12    6.44
   1   6  -1    6.49    1.63
   1   6  -1    6.53    1.53
   1   6  -1    5.77    1.46
   1   6   0  264.45    9.30
   1   6   0  256.04    8.88
   1   6   0  244.35    8.18
   1   6   1    4.74    0.84
  -1  -6  -1    4.88    0.81
   1   6   1    4.17    1.34
   1   6   1    4.42    1.23
   1   6   1    3.24    1.17
   1   6   2   46.96    4.00
   1   6   2   39.55    3.51
   1   6   2   50.42    3.69
   1   6   2   46.01    2.75
  -1  -6  -2   45.71    4.05
  -1  -6  -2   43.90    2.65
  -1  -6  -2   43.11    3.60
  -1  -6  -3   26.51    3.16
   1   6   3   25.59    2.36
  -1  -6  -3   25.53    2.81
   1   6   3   26.32    3.01
   1   6   4   63.95    4.06
  -1  -6  -4   60.73    4.34
  -1  -6  -4   60.98    4.79
   1   6   4   67.88    4.66
  -1  -6  -5  129.50    6.55
   1   6   5  133.71    6.36
  -1  -6  -5  135.68    7.17
   1   6   5  131.15    6.52
   1   6   6  174.24    7.79
   1   6   6  170.53    7.73
  -1  -6  -6  175.62    7.82
  -1  -6  -6  168.75    8.26
   1   6   7   77.10    5.54
  -1  -6  -7   75.46    5.82
   1   6   7   87.49    6.48
  -1  -6  -7   71.60    5.16
   1   6   7   82.30    5.73
   1   6   8  182.06    7.96
  -1  -6  -8  192.72    9.40
   1   6   8  182.07    9.09
  -1  -6  -8  173.50    8.37
   1   6   9   35.83    3.85
  -1  -6  -9   33.00    4.08
  -1  -6  -9   28.51    3.54
  -1  -6 -10   -1.58    1.80
   1   6  10    1.32    1.28
  -1  -6 -10    1.54    1.29
   1   6  11  133.73    7.54
  -1  -6 -11  128.89    8.06
  -1  -6 -11  128.22    8.56
   1   6  12    2.97    1.85
  -1  -6 -12   -0.33    1.78
   1   6  13   84.27    6.43
  -1  -6 -13   59.43    6.30
  -1  -6 -14   12.13    3.14
   1   6  14   22.29    3.74
  -1  -6 -15   26.55    4.45
   1   6  15   31.71    4.29
  -1  -6 -16   18.52    3.93
  -1  -6 -17    0.31    2.05
  -1  -6 -18    3.05    2.45
  -1  -7  19   -0.51    2.07
  -1  -7  18   42.19    6.55
  -1  -7  17    9.23    3.38
  -1  -7  16    7.61    3.21
  -1  -7  15  174.02   11.90
  -1  -7  14    0.26    2.03
  -1  -7  13   43.53    5.72
   1   7 -12   11.41    2.57
  -1  -7  12   11.68    3.06
  -1  -7  11   18.07    3.56
   1   7 -11   20.45    3.05
   1   7 -10    7.34    1.97
  -1  -7  10    8.67    2.49
   1   7  -9    6.65    1.71
  -1  -7   9    7.36    2.30
  -1  -7   8   -0.80    1.35
   1   7  -8   -0.07    1.03
  -1  -7   7   21.98    3.43
   1   7  -7   18.61    2.19
   1   7  -7   18.30    3.23
   1   7  -6   61.20    3.61
   1   7  -6   60.18    5.20
  -1  -7   6   59.22    5.19
   1   7  -5   10.91    1.43
  -1  -7   5    6.27    2.03
   1   7  -5    8.59    2.10
   1   7  -4   49.27    2.54
   1   7  -4   55.32    4.75
   1   7  -3   22.71    2.98
   1   7  -3   21.60    3.04
   1   7  -2   36.67    1.65
   1   7  -2   42.04    3.86
   1   7  -2   41.01    3.96
   1   7  -1  125.74    6.42
   1   7  -1  121.17    6.58
   1   7   0   52.14    4.09
   1   7   0   51.07    4.29
   1   7   1    3.56    0.79
   1   7   1    2.83    1.19
   1   7   1    4.51    1.34
   1   7   2  235.36    6.43
   1   7   2  237.06    8.93
  -1  -7  -2  245.52    9.88
  -1  -7  -2  241.32    6.38
  -1  -7  -2  229.58    8.61
   1   7   2  231.87    8.26
  -1  -7  -3    1.68    0.89
  -1  -7  -3   -0.29    1.40
   1   7   3    0.87    0.83
   1   7   3    0.58    0.82
  -1  -7  -3   -0.02    0.89
   1   7   3    0.51    0.96
  -1  -7  -4   77.05    5.77
  -1  -7  -4   75.44    4.41
   1   7   4   73.88    5.09
  -1  -7  -4   73.83    5.00
   1   7   4   80.06    5.94
   1   7   4   75.74    4.51
   1   7   5   89.06    5.24
  -1  -7  -5   89.41    6.30
   1   7   5   79.74    5.35
  -1  -7  -5   77.12    5.25
   1   7   5   92.20    6.50
  -1  -7  -6   -0.35    1.30
   1   7   6    1.56    1.74
  -1  -7  -6    1.51    1.13
   1   7   6    1.23    1.15
   1   7   6    1.66    1.41
  -1  -7  -7   94.64    6.78
   1   7   7   87.65    5.92
   1   7   7  101.15    6.48
   1   7   7  101.84    7.34
  -1  -7  -7   88.93    5.96
   1   7   8   66.77    5.62
   1   7   8   64.56    5.33
  -1  -7  -8   58.52    5.02
  -1  -7  -8   63.59    5.76
   1   7   9   56.65    4.74
  -1  -7  -9   58.13    5.13
  -1  -7  -9   60.31    5.74
   1   7  10   30.28    3.61
  -1  -7 -10   22.16    3.30
  -1  -7 -10   24.41    3.96
  -1  -7 -11    3.98    2.00
  -1  -7 -11    8.63    2.48
   1   7  11    7.80    2.21
  -1  -7 -12   40.97    5.41
   1   7  12   52.20    4.91
  -1  -7 -13    3.58    2.20
   1   7  13    7.08    2.17
   1   7  14   16.57    3.07
  -1  -7 -14   13.56    3.40
  -1  -7 -15   18.50    4.04
  -1  -7 -16    1.12    2.09
  -1  -7 -17    0.54    1.81
  -1  -8  18   17.32    4.21
  -1  -8  17   82.46    8.88
  -1  -8  16   17.83    4.39
  -1  -8  15   -2.80    2.74
  -1  -8  14   23.06    4.60
  -1  -8  13   -0.66    1.54
  -1  -8  12    9.16    3.00
   1   8 -12   14.13    2.98
   1   8 -11   50.90    4.83
  -1  -8  11   51.85    6.02
   1   8 -10    1.67    1.10
  -1  -8  10    3.08    2.24
   1   8  -9   43.40    3.93
  -1  -8   9   39.75    5.04
   1   8  -8    0.40    0.75
  -1  -8   8    0.71    1.59
   1   8  -7   53.31    3.73
  -1  -8   7   58.23    5.56
   1   8  -6    5.99    1.27
  -1  -8   6    7.24    2.16
   1   8  -6    5.07    1.91
   1   8  -5    1.25    0.78
   1   8  -5    3.25    1.69
  -1  -8   5    0.27    1.28
  -1  -8   4   30.86    3.74
   1   8  -4   29.82    3.81
   1   8  -4   33.88    3.86
   1   8  -3   27.00    3.61
   1   8  -3   27.58    1.66
   1   8  -3   26.75    3.56
   1   8  -3   28.99    3.57
   1   8  -2   51.20    4.64
   1   8  -2   49.69    4.51
   1   8  -2   45.73    4.63
   1   8  -1  165.93    8.67
   1   8  -1  159.99    7.73
   1   8  -1  145.41    7.59
   1   8   0    8.72    2.16
   1   8   0    9.57    2.07
   1   8   0    7.89    2.09
   1   8   1   16.57    2.42
   1   8   1   12.32    1.40
   1   8   1   10.62    2.15
   1   8   1   15.08    2.76
   1   8   2   10.31    2.05
   1   8   2    8.34    2.05
   1   8   2    9.60    1.43
   1   8   2    9.76    2.24
  -1  -8  -3   46.45    3.23
  -1  -8  -3   44.75    4.66
   1   8   3   46.02    3.29
   1   8   3   47.32    4.83
   1   8   3   42.55    4.06
   1   8   3   44.64    3.84
   1   8   4   32.18    3.84
  -1  -8  -4   37.23    4.32
   1   8   4   32.87    3.64
   1   8   4   29.80    2.91
  -1  -8  -4   29.58    3.37
   1   8   4   31.74    3.29
  -1  -8  -4   35.29    3.14
   1   8   4   33.26    4.17
  -1  -8  -5    1.91    1.60
  -1  -8  -5    3.72    1.38
   1   8   5    1.79    1.56
   1   8   5    0.38    0.87
  -1  -8  -5    2.54    1.23
   1   8   5    0.68    1.21
   1   8   5    1.97    1.26
  -1  -8  -6   86.75    6.74
   1   8   6   89.57    5.76
   1   8   6   92.04    6.10
  -1  -8  -6   85.31    5.90
   1   8   6   98.60    6.81
   1   8   7   52.33    4.71
   1   8   7   62.59    5.53
   1   8   7   60.18    5.11
  -1  -8  -7   50.74    5.26
  -1  -8  -7   51.29    4.71
   1   8   8   17.29    3.03
   1   8   8   17.35    3.14
   1   8   8   13.65    2.88
  -1  -8  -8   13.31    2.53
  -1  -8  -8   10.59    2.81
  -1  -8  -9   73.57    6.67
  -1  -8  -9   69.59    5.76
   1   8   9   70.96    5.34
  -1  -8 -10   11.49    2.96
   1   8  10   12.41    2.53
  -1  -8 -10    9.01    2.24
   1   8  11   63.42    5.26
  -1  -8 -11   56.56    6.18
   1   8  12    6.78    2.28
  -1  -8 -12   10.86    3.07
  -1  -8 -13   30.50    4.93
  -1  -8 -14   10.81    3.35
  -1  -8 -15    0.91    1.84
  -1  -8 -16    5.59    2.74
  -1  -9  18    4.67    2.97
  -1  -9  17   34.09    6.05
  -1  -9  16   -1.06    1.99
  -1  -9  15   50.40    6.90
  -1  -9  14    6.74    2.20
  -1  -9  13    6.39    2.80
   1   9 -12    2.23    1.74
  -1  -9  12   -1.02    2.46
  -1  -9  11    5.45    2.36
   1   9 -11    3.48    1.53
   1   9 -10   21.19    2.99
  -1  -9  10   19.41    3.74
  -1  -9   9   11.49    3.03
   1   9  -9   11.32    2.11
   1   9  -8   44.74    3.64
  -1  -9   8   42.81    5.20
   1   9  -7    2.03    0.82
  -1  -9   7    4.23    2.04
  -1  -9   6   22.05    3.58
   1   9  -6   22.45    2.17
   1   9  -5   -0.16    0.60
  -1  -9   5    2.48    1.80
   1   9  -4   15.11    2.91
   1   9  -4   16.81    1.52
   1   9  -4   17.86    3.10
  -1  -9   4   14.44    2.75
   1   9  -3   26.73    3.70
   1   9  -3   29.87    1.73
  -1  -9   3   26.89    3.58
   1   9  -3   26.29    3.59
   1   9  -2  154.69    8.45
   1   9  -2  151.82    8.11
   1   9  -1    3.21    1.65
   1   9  -1    1.73    1.27
   1   9   0  211.82    5.09
   1   9   0  206.32    9.05
   1   9   0  205.31    9.49
   1   9   1   43.34    4.37
   1   9   1   48.25    4.35
   1   9   1   44.40    2.68
   1   9   2   53.47    4.52
   1   9   2   50.92    3.17
   1   9   2   52.78    4.79
   1   9   3   41.17    3.20
   1   9   3   43.63    4.39
   1   9   3   44.07    4.09
   1   9   4   12.66    2.71
  -1  -9  -4   13.25    1.99
  -1  -9  -4   11.86    2.91
   1   9   4   12.33    2.03
   1   9   4    9.31    2.15
   1   9   4   13.62    2.27
  -1  -9  -5   55.33    5.70
   1   9   5   57.49    5.58
  -1  -9  -5   52.88    4.66
   1   9   5   58.11    4.58
   1   9   5   55.78    4.36
   1   9   5   61.58    5.19
   1   9   6    6.43    2.03
   1   9   6    8.39    2.02
   1   9   6    3.33    1.96
  -1  -9  -6    7.40    2.32
   1   9   6    5.85    1.61
  -1  -9  -6    7.39    1.97
   1   9   7   24.54    3.84
  -1  -9  -7   28.65    3.69
  -1  -9  -7   25.86    4.11
  -1  -9  -7   25.22    3.35
   1   9   7   26.44    3.60
   1   9   7   32.32    3.87
  -1  -9  -8   23.10    4.01
  -1  -9  -8   32.69    4.03
   1   9   8   27.42    3.76
   1   9   8   25.67    3.89
   1   9   8   30.07    4.00
  -1  -9  -8   25.57    3.49
  -1  -9  -9    2.59    1.67
   1   9   9    1.99    1.49
  -1  -9  -9   -0.68    1.47
  -1  -9 -10   28.08    4.56
   1   9  10   35.56    3.91
  -1  -9 -11    4.43    2.13
   1   9  11    0.66    1.22
  -1  -9 -12   11.93    3.42
  -1  -9 -13    8.29    2.85
  -1  -9 -14    2.49    2.40
  -1  -9 -15    1.23    2.14
  -1  -9 -16    0.02    1.54
  -1 -10  17    3.34    2.74
  -1 -10  16   21.45    4.77
  -1 -10  15   31.73    5.65
  -1 -10  14   -0.53    1.87
  -1 -10  13    3.57    2.24
  -1 -10  12   -0.20    1.97
  -1 -10  11    2.64    2.03
   1  10 -11    0.56    1.01
   1  10 -10   -0.96    1.00
  -1 -10  10    1.38    1.96
  -1 -10   9    0.33    1.76
   1  10  -9    0.51    1.03
  -1 -10   8    6.07    2.37
   1  10  -8    6.13    1.63
  -1 -10   7   -1.81    2.12
   1  10  -7   -0.20    0.81
   1  10  -6    0.33    0.54
  -1 -10   6    1.78    1.51
   1  10  -5   29.98    4.28
   1  10  -5   37.73    2.47
  -1 -10   5   35.66    4.56
   1  10  -4    2.73    1.63
   1  10  -4    1.84    0.58
   1  10  -4    1.41    0.52
  -1 -10   4    1.78    1.62
   1  10  -3   72.08    6.25
   1  10  -2   28.79    3.94
   1  10  -2   31.53    3.99
   1  10  -1  180.73    9.15
   1  10  -1  188.72    9.63
   1  10   0    3.50    1.61
   1  10   0    1.11    0.52
   1  10   0    1.64    1.68
   1  10   1  237.37    6.20
   1  10   1  227.12    9.74
   1  10   1  234.55   10.44
   1  10   2   10.25    1.56
   1  10   2   10.18    2.25
   1  10   2   11.44    2.35
   1  10   3   17.60    3.50
   1  10   3   19.88    2.31
   1  10   3   17.99    3.10
   1  10   3   17.47    2.75
   1  10   4   93.01    7.39
   1  10   4   85.91    5.11
   1  10   4   94.67    6.61
  -1 -10  -4   78.53    6.96
   1  10   4   78.31    5.62
   1  10   5   -1.38    1.77
   1  10   5    0.52    0.97
   1  10   5    0.89    1.15
  -1 -10  -5    0.07    1.56
   1  10   5    0.39    1.43
  -1 -10  -6   26.10    3.21
  -1 -10  -6   21.16    3.18
  -1 -10  -6   31.84    4.71
   1  10   6   30.57    3.50
   1  10   6   27.80    4.31
   1  10   6   29.73    3.84
   1  10   6   30.26    3.52
  -1 -10  -7  102.71    6.63
   1  10   7  108.33    7.00
  -1 -10  -7  108.83    8.57
  -1 -10  -7  104.46    7.01
   1  10   7  102.28    7.03
   1  10   7  105.41    6.37
   1  10   7  109.97    8.11
   1  10   8    3.92    2.20
  -1 -10  -8    0.11    1.69
   1  10   8    4.35    1.76
   1  10   9   31.90    3.78
  -1 -10  -9   37.72    5.38
   1  10   9   36.87    4.47
   1  10  10    0.43    1.45
  -1 -10 -10    0.87    1.87
  -1 -10 -11   26.95    4.67
  -1 -10 -12   11.90    3.46
  -1 -10 -13    1.97    2.14
  -1 -10 -14    7.28    2.89
  -1 -10 -15    2.78    2.84
  -1 -11  16   -9.81    3.70
  -1 -11  15   12.53    3.91
  -1 -11  14   -1.24    1.99
  -1 -11  13    0.64    2.20
  -1 -11  12   -1.16    2.44
  -1 -11  11    1.41    1.95
  -1 -11  10   -0.44    1.95
  -1 -11   9    5.57    2.49
   1  11  -8    6.14    1.36
  -1 -11   8    3.43    1.82
  -1 -11   7    7.31    2.67
   1  11  -7    9.22    1.53
   1  11  -6   16.45    1.81
  -1 -11   6   11.97    3.02
   1  11  -5    0.19    0.47
   1  11  -5    0.48    0.41
  -1 -11   5   -0.18    1.40
   1  11  -5   -1.00    1.67
   1  11  -4   64.48    6.22
   1  11  -4   56.64    2.50
   1  11  -3   16.20    3.40
   1  11  -3   10.91    0.95
   1  11  -2   81.72    6.82
   1  11  -1   13.52    1.10
   1  11  -1   17.45    3.36
   1  11   0    5.94    0.87
   1  11   0    7.03    2.12
   1  11   0    4.12    1.70
   1  11   1    9.47    2.23
   1  11   1    9.05    1.27
   1  11   1   13.55    2.81
   1  11   2    0.23    0.92
   1  11   2    0.52    0.53
   1  11   2    0.02    1.25
   1  11   3   26.63    3.60
   1  11   3   18.38    3.69
   1  11   3   20.01    2.36
   1  11   3   20.43    3.31
   1  11   4   -1.11    1.24
   1  11   4   -1.76    1.76
   1  11   4   -1.66    1.80
   1  11   4    2.73    1.29
   1  11   5  147.29    7.82
   1  11   5  162.29    7.60
   1  11   5  151.09   10.04
   1  11   5  156.00    8.82
  -1 -11  -6    7.70    2.75
   1  11   6   10.98    3.15
   1  11   6   13.07    2.38
   1  11   6   12.21    2.76
  -1 -11  -7    7.85    2.69
   1  11   7    5.32    1.97
   1  11   7    7.31    2.64
  -1 -11  -8   35.03    5.41
   1  11   8   38.85    4.56
   1  11   8   34.07    5.13
  -1 -11  -9    0.71    1.99
   1  11   9   -0.56    1.36
  -1 -11 -10   10.05    3.00
  -1 -11 -11    4.06    2.50
  -1 -11 -12    2.11    1.76
  -1 -11 -13    3.28    2.40
  -1 -11 -14    2.28    2.80
  -1 -12  14   -1.13    2.13
  -1 -12  13   15.33    4.27
  -1 -12  12   -0.51    2.19
  -1 -12  11    0.31    1.93
  -1 -12  10   -1.28    2.38
  -1 -12   9    2.78    1.95
  -1 -12   8    1.48    1.51
  -1 -12   7    8.80    2.88
   1  12  -7    9.31    3.15
   1  12  -6   62.35    3.16
  -1 -12   6   60.77    6.59
   1  12  -6   58.68    6.58
   1  12  -5    8.27    1.02
   1  12  -5   13.49    3.31
   1  12  -4    0.33    1.57
   1  12  -3   22.04    3.98
   1  12  -2   10.65    2.77
   1  12  -1   60.75    6.04
   1  12   0   43.83    5.10
   1  12   1   17.15    1.61
   1  12   1   16.11    3.20
   1  12   2   43.05    2.95
   1  12   2   43.52    5.81
   1  12   2   44.59    5.01
   1  12   3    0.65    2.09
   1  12   3    1.90    0.77
   1  12   3    2.88    1.87
   1  12   4   25.97    4.57
   1  12   4   32.20    4.25
   1  12   5   31.55    4.97
   1  12   5   31.90    4.25
   1  12   6   19.40    4.08
   1  12   6   18.16    3.39
   1  12   7   16.22    3.24
  -1 -12  -7   20.20    4.25
   1  12   7   16.17    3.83
  -1 -12  -8   -3.93    2.51
   1  12   8    2.47    2.59
  -1 -12  -9   21.01    4.37
  -1 -12 -10    1.39    2.03
  -1 -12 -11    7.65    3.33
  -1 -12 -12   15.60    4.05
  -1 -12 -13    1.81    1.81
  -1 -13  13   10.36    3.68
  -1 -13  12    0.68    2.05
  -1 -13  11    3.32    2.70
  -1 -13  10    0.19    2.16
  -1 -13   9   -1.61    2.53
   1  13  -8    1.93    1.73
  -1 -13   8    7.63    2.80
  -1 -13   7    2.62    1.92
   1  13  -7    4.13    2.24
   1  13  -6    6.95    3.02
   1  13  -5    3.26    2.11
   1  13  -4   13.80    3.51
   1  13  -3   11.84    3.30
   1  13  -2    3.92    2.14
   1  13  -1   53.77    6.01
   1  13   0    3.23    1.55
   1  13   1   26.46    4.11
   1  13   2    5.34    2.40
   1  13   2    6.53    2.31
   1  13   3   62.60    7.24
   1  13   3   68.92    6.47
   1  13   4    7.69    2.35
   1  13   4   12.73    3.50
   1  13   5   17.90    4.16
   1  13   5   10.81    2.79
   1  13   6   37.46    5.70
   1  13   7    3.49    2.68
   1  13   8   12.26    3.78
  -1 -13  -9    5.08    3.13
  -1 -13 -10    2.28    2.49
  -1 -13 -11    1.57    1.94
  -1 -13 -12    0.76    2.17
  -1 -14  12   -0.32    1.98
  -1 -14  11   -7.82    3.20
  -1 -14  10    0.63    1.73
   1  14  -9    1.25    2.13
  -1 -14   9    1.42    1.92
  -1 -14   8    8.03    3.10
   1  14  -8   11.01    3.72
   1  14  -7   -2.15    2.71
   1  14  -6   18.87    4.04
   1  14  -5   -0.30    1.74
   1  14  -4    1.72    1.82
   1  14  -3   32.20    5.05
   1  14  -2    6.71    2.60
   1  14  -1    7.42    2.67
   1  14   0   13.03    3.16
   1  14   1    3.09    2.31
   1  14   1    1.10    2.14
   1  14   2   35.64    5.73
   1  14   2   32.63    4.69
   1  14   3   10.02    3.55
   1  14   3   10.16    3.00
   1  14   4   37.24    5.95
   1  14   5   47.85    6.79
   1  14   6    2.00    2.37
   1  14   7   19.82    4.59
   1  14   8    3.22    2.49
   1  15 -11    1.78    2.03
   1  15 -10    1.86    1.96
  -1 -15  10    3.58    2.65
   1  15  -9    1.27    2.16
  -1 -15   9    0.28    2.03
   1  15  -8   -0.02    2.17
   1  15  -7    3.99    2.62
   1  15  -6   14.21    3.97
   1  15  -5    4.97    3.17
   1  15  -4   11.72    3.67
   1  15  -3    4.42    2.45
   1  15  -2    7.78    2.86
   1  15  -1   11.99    3.03
   1  15   0    3.38    2.24
   1  15   0   -0.41    2.43
   1  15   1   36.83    5.24
   1  15   1   39.62    6.49
   1  15   2   -6.25    3.38
   1  15   3    6.65    3.08
   1  15   4    2.13    2.05
   1  15   5   -3.15    2.78
   1  15   6    7.47    3.51
   1  15   7   10.67    3.56
   1  15   8    1.48    2.49
   1  16  -9   -0.99    2.15
   1  16  -8    2.22    2.90
   1  16  -7    1.56    2.42
   1  16  -6   -0.81    1.81
   1  16  -5    8.81    3.33
   1  16  -4    1.76    2.09
   1  16  -3    9.36    3.31
   1  16  -2   26.85    4.98
   1  17  -7    0.58    1.91
   1  17  -6    5.99    3.20
   1  17  -5    2.52    2.35
   2 -17   5   15.02    3.75
   2 -17   6    3.45    2.54
  -2  17  -7   -4.23    2.59
   2 -17   7   -4.67    2.60
   2 -17   8   13.08    3.93
  -2  16   5    9.45    4.28
  -2  16   4   -0.27    2.37
  -2  16   3    0.29    2.52
  -2  16   2   -0.02    1.86
  -2  16   1    3.60    2.81
  -2  16   0   11.59    4.08
  -2  16  -1   -2.04    2.28
  -2  16  -2   18.66    4.86
  -2  16  -3   -0.76    2.30
  -2  16  -3   -0.98    1.73
  -2  16  -4   14.86    3.54
  -2  16  -4   15.66    4.19
   2 -16   4   20.50    4.02
  -2  16  -5   10.74    3.20
  -2  16  -5    7.53    3.20
   2 -16   5    7.24    2.97
   2 -16   6   16.37    4.00
  -2  16  -6   20.34    4.85
   2 -16   7    5.52    2.58
  -2  16  -7    6.83    3.11
   2 -16   8   -3.62    2.50
   2 -16   9   25.29    5.07
   2 -15  -8    0.29    2.03
   2 -15  -7   -4.49    2.67
  -2  15   6   -2.74    2.87
   2 -15  -6    2.31    2.29
  -2  15   5    2.31    2.92
  -2  15   4   10.52    3.84
  -2  15   3    2.45    1.73
  -2  15   2   19.01    4.60
  -2  15   1    6.24    2.98
  -2  15   0   12.41    3.96
  -2  15   0    7.34    2.10
  -2  15  -1   39.93    4.78
  -2  15  -1   34.84    4.05
  -2  15  -2    3.56    1.79
  -2  15  -2    1.28    1.93
   2 -15   2    5.13    2.05
  -2  15  -3   23.07    3.99
  -2  15  -3   23.57    5.24
   2 -15   3   25.47    4.12
  -2  15  -4    6.32    2.52
  -2  15  -4    5.60    2.89
   2 -15   4    6.41    2.50
  -2  15  -5    7.84    3.01
   2 -15   5    7.00    2.50
   2 -15   6   24.62    4.59
  -2  15  -6   33.01    5.89
   2 -15   7   -2.10    2.49
  -2  15  -7    1.60    2.85
   2 -15   8   21.82    4.43
  -2  15  -8   22.12    5.19
   2 -15   9    1.16    2.62
   2 -15  10   16.52    4.47
   2 -15  11   21.21    4.90
  -2  14  11    3.85    2.26
   2 -14 -10   17.75    4.65
  -2  14  10   15.34    3.64
   2 -14  -9   -4.12    2.67
  -2  14   9   -3.19    1.95
   2 -14  -8    4.05    2.41
  -2  14   8    4.94    2.20
   2 -14  -7    3.67    2.04
   2 -14  -6    1.73    2.24
  -2  14   6    0.45    2.39
   2 -14  -5   -0.52    2.06
  -2  14   5    3.75    2.96
  -2  14   4   -0.37    2.27
  -2  14   3   -1.76    2.79
  -2  14   2    3.12    2.19
  -2  14   2    2.99    1.42
  -2  14   1    6.88    2.96
  -2  14   1    7.41    1.94
  -2  14   0   31.74    3.85
  -2  14   0   25.94    3.62
  -2  14   0   33.21    5.75
  -2  14  -1   -0.75    1.45
  -2  14  -1    1.26    2.28
  -2  14  -1    1.88    1.43
  -2  14  -2   40.01    4.78
  -2  14  -2   30.51    3.76
  -2  14  -2   36.33    6.05
   2 -14   2   35.41    4.59
  -2  14  -3    4.51    1.71
  -2  14  -3    3.93    2.55
   2 -14   3    4.15    1.76
  -2  14  -4   30.28    5.68
  -2  14  -4   30.62    3.91
   2 -14   4   23.89    4.15
  -2  14  -5   39.08    6.31
   2 -14   5   55.29    6.23
   2 -14   6   -1.70    1.89
  -2  14  -6   -3.97    3.55
   2 -14   7   37.96    5.66
   2 -14   8   19.03    4.15
   2 -14   9   21.14    4.60
   2 -14  10   53.30    6.98
   2 -14  11    5.42    2.87
   2 -14  12    9.92    3.41
  -2  13  14    8.16    3.17
  -2  13  13    2.61    2.21
  -2  13  12    6.94    2.98
   2 -13 -12    0.11    1.72
  -2  13  11   -1.70    1.84
   2 -13 -11    0.55    2.17
   2 -13 -10    7.40    3.01
  -2  13  10   10.69    3.39
  -2  13   9    0.58    1.83
   2 -13  -9    4.96    2.85
   2 -13  -8    2.10    2.00
   2 -13  -7    3.32    2.51
  -2  13   6    1.43    2.53
   2 -13  -6   -2.43    2.82
  -2  13   5    3.22    2.85
   2 -13  -5    0.63    1.80
  -2  13   4   -0.31    1.74
  -2  13   4    0.22    1.01
   2 -13  -4   -1.01    2.10
  -2  13   3    1.07    2.13
  -2  13   3    2.30    1.13
  -2  13   2    0.65    0.96
  -2  13   2   -0.17    1.92
  -2  13   1   46.30    6.22
  -2  13   1   38.47    3.96
  -2  13   1   43.81    4.23
  -2  13   0    8.55    2.95
  -2  13   0    8.16    2.19
  -2  13   0    7.51    2.01
  -2  13   0   11.22    2.38
  -2  13  -1   51.02    6.51
  -2  13  -1   42.74    4.34
   2 -13   1   47.33    4.85
  -2  13  -1   54.25    5.24
  -2  13  -1   41.91    4.48
   2 -13   2   11.55    2.78
  -2  13  -2    7.29    1.95
  -2  13  -2   11.33    3.42
  -2  13  -3    7.65    2.86
   2 -13   3    6.97    2.40
  -2  13  -3    6.75    1.98
  -2  13  -4   75.31    7.88
   2 -13   4   75.02    6.88
   2 -13   5    2.29    2.03
  -2  13  -5   -0.24    1.66
   2 -13   6   79.39    7.45
   2 -13   7   30.36    4.82
   2 -13   8   71.68    7.55
   2 -13   9   24.72    4.81
   2 -13  10   -2.38    2.51
   2 -13  11   62.52    7.68
   2 -13  12    4.73    3.05
   2 -13  13   12.07    4.07
  -2  12  15   13.62    3.92
  -2  12  14   -2.19    2.20
   2 -12 -14    2.23    2.28
   2 -12 -13    2.28    2.42
  -2  12  13   -1.46    1.74
  -2  12  12    1.67    1.94
   2 -12 -12    5.54    2.91
   2 -12 -11    2.95    3.07
  -2  12  11    2.44    2.18
  -2  12  10   -0.64    1.67
   2 -12 -10    1.69    2.44
   2 -12  -9   -2.22    2.56
  -2  12   9    1.06    1.49
   2 -12  -8    1.33    2.14
   2 -12  -7    8.50    3.30
   2 -12  -6    1.18    1.80
  -2  12   6   -2.63    2.48
  -2  12   6    0.47    0.63
  -2  12   5    2.90    2.26
  -2  12   5    1.66    0.73
   2 -12  -4   -2.40    2.43
  -2  12   4    3.28    2.56
  -2  12   4    1.38    0.89
  -2  12   4    0.48    0.85
  -2  12   3    0.67    0.89
  -2  12   3    0.73    0.79
   2 -12  -3    0.21    1.71
  -2  12   3   -1.54    1.78
  -2  12   2    1.77    1.25
  -2  12   2   -0.09    0.90
  -2  12   2   -0.57    2.02
  -2  12   1    0.59    2.00
  -2  12   1    2.41    1.36
  -2  12   1   -0.88    1.48
  -2  12   1    0.93    1.01
  -2  12   0    3.07    1.58
  -2  12   0    0.69    1.20
  -2  12   0    0.33    1.81
  -2  12   0    3.18    1.52
   2 -12   1   94.37    6.42
  -2  12  -1   83.37    6.09
  -2  12  -1   89.65    6.35
  -2  12  -1   87.39    7.98
  -2  12  -1   82.16    5.84
  -2  12  -2   63.43    5.61
  -2  12  -2   68.15    5.28
  -2  12  -2   73.53    7.40
   2 -12   2   69.30    5.80
  -2  12  -3   56.92    6.53
   2 -12   3   59.04    5.52
   2 -12   4   16.11    3.10
   2 -12   5  183.23   10.45
   2 -12   6   -0.01    1.48
   2 -12   7   63.81    6.74
   2 -12   8   47.03    5.96
   2 -12   9   17.00    3.85
   2 -12  10  143.58   10.91
   2 -12  11    4.92    2.84
   2 -12  12   50.68    6.96
   2 -12  13   15.71    4.12
   2 -12  14    4.42    3.33
  -2  11  16    6.73    3.16
  -2  11  15    0.72    1.70
   2 -11 -15    1.21    2.36
  -2  11  14   12.88    3.96
   2 -11 -14    4.01    2.56
   2 -11 -13    6.60    3.19
  -2  11  13    9.49    3.05
  -2  11  12    1.86    2.22
   2 -11 -12   -1.02    2.37
   2 -11 -11   11.86    3.45
  -2  11  11   12.80    3.31
   2 -11 -10    6.94    2.95
  -2  11  10   -0.11    1.78
   2 -11  -9    2.09    1.91
   2 -11  -8    3.79    2.90
   2 -11  -7    0.04    1.90
  -2  11   6   34.79    5.30
   2 -11  -6   35.56    5.16
  -2  11   6   38.27    2.40
  -2  11   5   29.10    2.35
   2 -11  -5   32.38    5.03
  -2  11   5   33.36    5.01
  -2  11   5   32.24    2.24
  -2  11   4   18.67    3.90
   2 -11  -4   18.14    3.93
  -2  11   4   20.18    2.10
  -2  11   4   21.27    2.24
   2 -11  -3   41.75    5.40
  -2  11   3   35.17    5.00
  -2  11   3   36.24    3.08
  -2  11   3   36.58    3.09
  -2  11   2    6.43    1.80
  -2  11   2    9.09    1.81
  -2  11   2    8.77    2.85
  -2  11   2   10.23    1.91
   2 -11  -2   13.12    3.19
  -2  11   1  184.34    8.44
  -2  11   1  184.01   11.00
  -2  11   1  176.41    7.56
  -2  11   1  174.31    7.56
  -2  11   0    0.56    1.05
  -2  11   0    1.00    1.05
  -2  11   0    1.12    1.07
  -2  11   0   -0.14    2.09
  -2  11  -1    8.81    2.03
  -2  11  -1    7.26    2.72
  -2  11  -1    9.91    2.27
  -2  11  -2   87.95    7.66
  -2  11  -2   94.26    6.51
   2 -11   2   97.05    6.54
  -2  11  -3   -1.12    2.71
   2 -11   3    2.01    1.48
  -2  11  -3    2.85    1.79
   2 -11   4  153.67    8.89
   2 -11   5    0.41    1.39
   2 -11   6  125.70    8.65
   2 -11   7   64.17    6.47
   2 -11   8   36.66    5.18
   2 -11   9   41.21    5.66
   2 -11  10    9.73    3.25
   2 -11  11   63.67    7.32
   2 -11  12   53.86    7.04
   2 -11  13    6.87    3.04
   2 -11  14   22.25    4.96
   2 -11  15    3.38    2.74
  -2  10  16    3.71    2.58
   2 -10 -16    2.58    2.38
   2 -10 -15    5.40    2.90
  -2  10  15   12.42    3.76
   2 -10 -14   38.05    6.13
  -2  10  14   34.59    5.57
  -2  10  13    2.16    1.72
   2 -10 -13    0.74    1.99
   2 -10 -12    4.47    2.44
  -2  10  12   11.49    3.29
   2 -10 -11    1.61    2.00
  -2  10  11    1.07    1.56
   2 -10 -10   19.84    4.25
  -2  10  10   14.34    3.23
   2 -10  -9    0.25    1.62
   2 -10  -8    0.49    1.89
   2 -10  -7   21.68    4.09
   2 -10  -6    2.86    1.93
  -2  10   6    3.44    2.50
  -2  10   6    1.44    0.66
  -2  10   5    0.61    1.61
   2 -10  -5    2.13    1.87
  -2  10   5    0.67    0.50
  -2  10   5   -0.20    0.52
   2 -10  -4    2.16    1.86
  -2  10   4    0.92    1.65
  -2  10   4    0.20    0.65
  -2  10   4    0.52    0.64
  -2  10   3    3.21    0.97
   2 -10  -3    2.97    1.67
  -2  10   3    2.87    0.97
  -2  10   2    8.86    1.62
   2 -10  -2    4.43    2.13
  -2  10   2    8.51    2.68
  -2  10   2    6.81    1.43
  -2  10   2    8.11    1.93
   2 -10  -1   24.02    3.92
  -2  10   1   26.69    4.21
  -2  10   1   24.07    2.71
  -2  10   1   24.65    2.74
  -2  10   1   22.70    3.02
   2 -10  -1   21.31    2.58
  -2  10   0  167.85    7.69
  -2  10   0  151.60    9.46
  -2  10   0  161.97    7.31
  -2  10  -1  234.13    9.03
  -2  10  -1  234.15   11.63
  -2  10  -1  216.01    8.94
  -2  10  -2   13.68    2.58
  -2  10  -2    9.30    2.41
  -2  10  -3  131.68    7.66
   2 -10   3  128.92    7.53
   2 -10   4    4.86    2.01
  -2  10  -4    3.97    1.88
   2 -10   5  102.04    7.34
   2 -10   6   94.77    7.30
   2 -10   7   42.97    5.23
   2 -10   8   51.17    5.85
   2 -10   9   13.84    3.44
   2 -10  10  124.09    9.58
   2 -10  11   11.58    3.35
   2 -10  12   33.46    5.58
   2 -10  13   39.83    6.24
   2 -10  14    4.75    2.66
   2 -10  15   17.61    4.58
   2 -10  16   -2.72    2.10
   2  -9 -17   -1.64    2.66
  -2   9  17    2.00    2.42
   2  -9 -16   17.04    4.23
  -2   9  16   16.64    4.11
  -2   9  15   10.36    3.17
   2  -9 -15    4.09    2.62
   2  -9 -14   14.59    4.22
  -2   9  14   11.23    3.37
  -2   9  13   23.91    4.48
   2  -9 -13   25.53    4.73
   2  -9 -12   -0.68    2.12
  -2   9  12   -0.18    1.63
   2  -9 -11    5.87    2.72
  -2   9  11   10.46    3.10
   2  -9 -10    1.34    1.76
  -2   9  10   -0.65    1.50
   2  -9  -9   -0.52    2.21
   2  -9  -8    0.12    2.14
   2  -9  -7   18.50    3.61
   2  -9  -7   21.63    3.22
   2  -9  -6   37.99    4.88
  -2   9   6   35.62    4.89
  -2   9   5   54.59    2.57
   2  -9  -5   61.32    6.02
  -2   9   5   57.54    5.82
  -2   9   5   50.17    2.19
   2  -9  -4   11.05    2.84
  -2   9   4   17.20    1.66
  -2   9   4   17.05    1.61
  -2   9   4   19.61    3.70
  -2   9   3  169.17    5.53
   2  -9  -3  172.30    9.67
  -2   9   3  169.11    5.57
  -2   9   3  169.10    9.50
  -2   9   3  167.04    7.85
  -2   9   2    1.04    0.87
  -2   9   2    3.01    1.12
  -2   9   2    1.40    1.66
  -2   9   2    2.04    1.23
   2  -9  -2    1.92    0.88
   2  -9  -2    2.20    1.65
  -2   9   1  113.07    6.18
  -2   9   1  105.18    5.23
   2  -9  -1  117.42    5.41
  -2   9   1  122.05    7.95
   2  -9  -1  115.71    7.79
  -2   9   1  109.76    7.61
  -2   9   0  110.02    7.67
  -2   9   0  116.07    7.70
  -2   9   0  115.13    6.15
  -2   9   0  115.20    5.80
   2  -9   0  100.84    5.41
  -2   9  -1   49.76    5.05
  -2   9  -1   47.27    5.03
  -2   9  -1   51.38    4.25
  -2   9  -2  193.31    9.84
  -2   9  -2  176.04    9.44
  -2   9  -2  175.57    8.07
  -2   9  -3   13.06    2.74
  -2   9  -3   14.98    2.73
  -2   9  -4  167.29    8.69
   2  -9   4  168.74    8.68
   2  -9   5   64.52    5.63
  -2   9  -5   62.65    5.66
   2  -9   6    7.49    2.39
   2  -9   7  130.40    8.63
   2  -9   8   12.07    2.76
   2  -9   9  122.04    8.98
   2  -9  10  116.13    9.09
   2  -9  11    7.69    2.72
   2  -9  12   96.56    8.88
   2  -9  13    1.32    2.03
   2  -9  14   36.91    5.81
   2  -9  15    4.74    2.65
   2  -9  16   17.48    4.51
   2  -8 -18    2.79    2.83
   2  -8 -17   11.32    4.22
  -2   8  17   12.25    3.82
  -2   8  16   13.71    3.60
   2  -8 -16   15.08    4.36
  -2   8  15   12.77    3.29
   2  -8 -15   16.72    4.39
   2  -8 -14   23.73    4.67
  -2   8  14   24.69    4.83
   2  -8 -13    0.72    1.92
  -2   8  13    0.24    1.40
  -2   8  12    5.55    2.41
   2  -8 -12    3.27    1.99
   2  -8 -11   -0.27    1.67
   2  -8 -11    0.59    0.49
  -2   8  11    1.43    1.53
   2  -8 -10   26.67    4.66
   2  -8 -10   31.75    2.20
   2  -8  -9    1.28    0.50
   2  -8  -9    1.20    1.94
   2  -8  -8    2.42    1.86
   2  -8  -7    3.24    1.93
   2  -8  -7    6.15    1.64
   2  -8  -6   29.30    3.48
   2  -8  -6   24.71    3.76
  -2   8   5    7.60    2.73
  -2   8   5    7.80    2.42
  -2   8   5    5.44    0.78
   2  -8  -5    8.39    2.51
  -2   8   4    9.62    2.80
  -2   8   4   11.05    2.76
   2  -8  -4    8.14    2.55
  -2   8   4    7.15    0.94
  -2   8   4    8.83    1.08
  -2   8   3    1.95    0.68
  -2   8   3    2.26    0.78
  -2   8   3    1.20    1.53
  -2   8   3    3.26    1.39
   2  -8  -3    3.50    1.94
  -2   8   2  124.37    4.76
  -2   8   2  126.10    6.46
   2  -8  -2  115.58    4.52
  -2   8   2  126.45    4.75
   2  -8  -2  119.70    7.50
  -2   8   1   81.83    4.28
  -2   8   1   72.27    4.79
   2  -8  -1   72.22    3.97
   2  -8  -1   71.37    5.71
   2  -8   0  185.00    9.12
   2  -8   0  170.92    6.62
  -2   8   0  177.53    6.79
  -2   8   0  196.02    9.40
  -2   8  -1  709.55   17.59
  -2   8  -1  671.79   14.04
  -2   8  -1  673.41   17.42
  -2   8  -2   51.99    4.86
  -2   8  -2   58.58    5.09
  -2   8  -2   52.87    4.29
  -2   8  -3  204.58    8.74
  -2   8  -3  205.30    9.58
  -2   8  -4   68.77    5.39
  -2   8  -4   70.29    5.75
   2  -8   5   89.16    6.41
  -2   8  -5  101.42    6.88
  -2   8  -5  102.86    6.93
  -2   8  -6  124.53    7.87
   2  -8   6  115.15    7.53
  -2   8  -6  134.20    8.09
   2  -8   7    7.13    2.19
   2  -8   8  110.50    8.00
   2  -8   9   22.46    3.94
   2  -8  10   42.74    5.46
   2  -8  11  119.46    9.17
   2  -8  12   34.62    5.38
   2  -8  13    5.20    2.75
   2  -8  14   19.42    4.73
   2  -8  15    8.02    2.95
   2  -8  16    1.89    2.41
   2  -8  17    8.60    3.39
   2  -7 -19   -0.88    2.82
   2  -7 -18    8.64    3.21
  -2   7  18   10.39    3.72
   2  -7 -17    0.33    2.08
  -2   7  17    6.03    2.77
   2  -7 -16   -1.81    2.53
  -2   7  16    0.96    2.22
   2  -7 -15   11.55    3.82
  -2   7  15   10.21    3.24
   2  -7 -14    3.64    2.10
  -2   7  14    3.75    2.40
  -2   7  13   -0.11    0.53
  -2   7  13   -1.38    1.92
   2  -7 -12    8.07    1.54
  -2   7  12    9.25    2.64
   2  -7 -12    5.10    2.43
  -2   7  12   10.12    1.13
  -2   7  11    1.82    1.44
   2  -7 -11    3.66    0.99
  -2   7  11    3.03    0.54
   2  -7 -11    3.34    2.21
   2  -7 -10   -0.29    0.63
   2  -7 -10    1.60    1.22
   2  -7 -10   -0.52    1.91
   2  -7  -9   -0.24    1.74
   2  -7  -9    0.91    0.50
   2  -7  -9   -1.63    1.73
   2  -7  -8   22.90    3.45
   2  -7  -8   26.77    3.56
   2  -7  -8   22.66    1.55
   2  -7  -8   25.76    4.01
   2  -7  -7   27.32    4.09
  -2   7   7   32.57    4.62
   2  -7  -7   26.56    3.47
  -2   7   6    2.58    1.67
   2  -7  -6    0.48    1.51
  -2   7   5    5.88    2.35
   2  -7  -5    3.00    1.71
  -2   7   4    5.52    0.68
   2  -7  -4    6.11    2.25
  -2   7   4    6.84    0.76
  -2   7   3   61.34    4.42
   2  -7  -3   53.03    4.81
  -2   7   3   52.50    2.45
  -2   7   3   51.81    2.38
  -2   7   2   62.65    3.06
  -2   7   2   58.35    4.22
   2  -7  -2   57.66    2.98
  -2   7   2   62.87    2.94
   2  -7  -2   57.12    4.89
   2  -7  -1  156.12    7.83
  -2   7   1  150.47    6.59
  -2   7   1  151.25    5.34
   2  -7  -1  148.09    5.27
  -2   7   0 1074.40   15.54
   2  -7   0 1088.18   20.54
   2  -7   0 1107.17   15.71
  -2   7  -1    2.13    1.28
  -2   7  -1    1.70    1.18
   2  -7   1    1.09    0.87
  -2   7  -1    5.11    1.53
   2  -7   2  196.14    7.65
  -2   7  -2  194.37    7.68
  -2   7  -2  187.88    8.52
  -2   7  -2  199.67    8.73
  -2   7  -3   98.10    6.17
  -2   7  -3   96.85    5.80
  -2   7  -4  285.95   10.61
  -2   7  -4  300.15   10.62
  -2   7  -5  609.04   15.78
  -2   7  -5  585.63   15.66
   2  -7   6   32.24    4.04
  -2   7  -6   34.10    4.18
   2  -7   7  232.87   10.81
  -2   7  -7  249.48   11.17
   2  -7   8   92.21    7.13
   2  -7   9   70.72    6.62
   2  -7  10   59.61    6.24
   2  -7  11   50.31    5.96
   2  -7  12  158.23   10.72
   2  -7  13   -0.29    1.89
   2  -7  14   13.88    3.79
   2  -7  15    9.09    3.22
   2  -7  16    9.87    3.56
   2  -7  17   13.84    4.49
   2  -7  18    5.01    3.63
   2  -6 -19    7.98    3.45
   2  -6 -18    5.06    3.41
  -2   6  18    6.36    2.78
   2  -6 -17   11.07    3.89
  -2   6  17   13.31    4.24
  -2   6  16    6.31    2.89
   2  -6 -16    7.57    3.14
   2  -6 -15    0.24    1.75
  -2   6  15   -2.47    1.09
  -2   6  15   -1.57    1.86
  -2   6  14    8.03    1.52
   2  -6 -14    6.88    2.93
  -2   6  14   10.53    3.17
   2  -6 -13   10.33    3.40
  -2   6  13    6.87    2.48
  -2   6  13    3.85    1.01
   2  -6 -13    7.38    1.72
  -2   6  12   -0.72    1.45
   2  -6 -12    0.82    2.24
  -2   6  12   -0.28    0.66
   2  -6 -12   -1.67    1.53
   2  -6 -12   -1.06    1.15
   2  -6 -11    0.29    1.28
  -2   6  11    0.75    0.45
  -2   6  11    2.74    1.72
   2  -6 -11   -0.57    0.87
   2  -6 -11    3.00    2.28
  -2   6  10    0.47    0.39
   2  -6 -10    0.01    1.07
   2  -6 -10    0.32    0.64
  -2   6   9    1.98    0.43
   2  -6  -9    3.68    2.42
   2  -6  -9    1.84    1.60
   2  -6  -9    2.73    1.39
   2  -6  -9    2.77    0.80
   2  -6  -8   11.97    2.45
   2  -6  -8   10.58    2.91
   2  -6  -8   10.75    1.15
   2  -6  -8   10.39    2.32
   2  -6  -7   10.83    2.19
   2  -6  -7    6.23    2.15
   2  -6  -7    8.80    2.06
   2  -6  -7    8.17    0.82
   2  -6  -6   71.07    5.32
   2  -6  -6   58.78    5.15
   2  -6  -5   47.81    4.59
   2  -6  -5   52.17    4.50
   2  -6  -4  406.71   12.24
   2  -6  -4  410.50   11.17
   2  -6  -4  380.60   12.22
  -2   6   3   24.46    2.80
   2  -6  -3   25.94    1.43
   2  -6  -3   26.15    3.25
  -2   6   3   26.75    1.39
  -2   6   3   25.94    1.47
   2  -6  -2   17.01    2.54
   2  -6  -2   21.74    1.64
  -2   6   2   20.00    2.43
  -2   6   2   22.44    1.69
   2  -6  -1  303.25   10.12
  -2   6   1  293.96    6.88
  -2   6   1  291.59    8.65
   2  -6  -1  300.99    6.87
  -2   6   0    2.59    1.08
  -2   6   0    2.62    1.27
   2  -6   0    2.81    1.23
   2  -6   0    4.09    1.12
  -2   6  -1  300.91    9.81
   2  -6   1  289.66    8.27
  -2   6  -1  301.93   10.05
  -2   6  -1  315.79    8.60
  -2   6  -2  222.54    8.45
   2  -6   2  203.89    7.40
  -2   6  -2  216.55    7.71
  -2   6  -2  200.61    8.08
  -2   6  -3  388.13   11.23
   2  -6   3  387.15   10.98
  -2   6  -3  377.07   10.88
  -2   6  -4  103.48    5.95
  -2   6  -4   96.48    5.87
  -2   6  -5   44.15    4.27
   2  -6   6  629.89   16.41
  -2   6  -6  668.59   16.91
   2  -6   7    2.26    1.72
  -2   6  -7    3.82    1.59
   2  -6   8  243.58   11.14
   2  -6   9  133.62    8.65
   2  -6  10    9.72    2.86
   2  -6  11   15.98    3.53
   2  -6  12    7.83    2.97
   2  -6  13    4.39    2.39
   2  -6  14   38.42    5.75
   2  -6  15    5.16    2.57
   2  -6  16    8.04    3.12
   2  -6  17    3.78    2.66
   2  -6  18    7.11    3.73
   2  -5 -20   12.03    4.02
   2  -5 -19   -6.48    3.34
   2  -5 -18    3.50    2.94
  -2   5  18    3.14    2.22
  -2   5  17    8.12    2.91
   2  -5 -17    2.02    2.87
   2  -5 -16    4.06    3.05
  -2   5  16    3.66    2.08
  -2   5  16    4.73    1.59
   2  -5 -15   -0.06    2.07
  -2   5  15   -5.05    2.35
  -2   5  15   -0.75    0.94
   2  -5 -14   84.50    8.12
  -2   5  14   86.94    5.08
  -2   5  14   81.39    7.77
   2  -5 -14   74.59    5.43
   2  -5 -13    0.37    1.19
   2  -5 -13   -1.23    1.27
   2  -5 -13   -2.32    2.32
  -2   5  13   -0.63    0.76
  -2   5  13   -0.06    1.57
   2  -5 -12    3.82    1.66
  -2   5  12    3.80    1.11
   2  -5 -12    1.67    2.11
  -2   5  12    3.47    1.97
   2  -5 -12    4.10    1.50
  -2   5  11   -0.03    1.73
  -2   5  11    0.82    0.61
   2  -5 -11    0.23    0.78
   2  -5 -11    0.93    1.22
   2  -5 -11   -2.02    2.43
   2  -5 -10   33.51    4.65
   2  -5 -10   32.63    2.74
  -2   5  10   30.33    4.19
   2  -5 -10   30.22    3.78
  -2   5  10   33.82    2.25
   2  -5  -9   12.43    2.88
   2  -5  -9   15.07    2.71
   2  -5  -9   12.10    2.41
  -2   5   9   12.77    1.23
   2  -5  -9   11.18    1.50
   2  -5  -8    3.58    1.64
   2  -5  -8    3.93    2.30
   2  -5  -8    2.74    1.40
  -2   5   8    2.45    0.48
   2  -5  -8    2.86    0.74
   2  -5  -7  134.46    7.76
   2  -5  -7  131.29    6.98
   2  -5  -7  125.93    3.47
   2  -5  -6   58.42    4.63
   2  -5  -6   59.41    5.06
   2  -5  -5   90.76    5.90
   2  -5  -5   82.15    5.34
   2  -5  -5   85.11    5.16
   2  -5  -4   21.16    2.81
   2  -5  -4   22.32    2.76
   2  -5  -4   22.62    2.60
   2  -5  -3  214.70    8.14
   2  -5  -3  206.01    8.07
  -2   5   3  204.33    7.31
   2  -5  -2    4.69    1.49
  -2   5   2    5.43    1.43
   2  -5  -2    3.09    0.71
   2  -5  -2    3.24    1.13
  -2   5   2    4.03    0.77
   2  -5  -1   12.59    2.14
  -2   5   1   15.27    1.52
   2  -5  -1   11.88    1.41
  -2   5   0  794.29   14.57
   2  -5   0  780.47   11.48
   2  -5   0  769.90   14.44
  -2   5   0  799.61   11.70
   2  -5   1  265.57    8.45
  -2   5  -1  277.65    8.50
   2  -5   1  278.54    7.61
  -2   5  -1  268.61    8.65
  -2   5  -1  276.74    7.62
  -2   5  -2   25.58    2.71
  -2   5  -2   27.70    2.79
   2  -5   2   29.25    2.76
  -2   5  -2   28.48    2.81
  -2   5  -3  689.82   13.59
  -2   5  -3  660.79   13.74
   2  -5   3  636.19   13.51
  -2   5  -4  201.16    8.17
   2  -5   4  193.27    7.98
  -2   5  -5  577.77   14.55
  -2   5  -6    4.96    1.89
  -2   5  -7  351.42   12.59
   2  -5   8   37.93    4.50
  -2   5  -8   34.75    4.29
   2  -5   9   33.11    4.31
   2  -5  10   61.71    6.08
   2  -5  11    2.51    1.68
   2  -5  12   67.41    6.72
   2  -5  13   34.07    5.20
   2  -5  14   -0.57    1.79
   2  -5  15    6.84    2.76
   2  -5  16    2.11    2.54
   2  -5  17    8.63    3.20
   2  -5  18    5.21    3.10
   2  -5  19    1.27    2.94
   2  -4 -20    1.52    2.80
   2  -4 -19    3.21    3.40
   2  -4 -18    7.38    3.48
  -2   4  18   -0.84    2.33
  -2   4  17    1.34    2.16
  -2   4  17    1.31    1.34
   2  -4 -17    0.52    2.56
  -2   4  16    8.08    2.16
   2  -4 -16   12.19    3.84
  -2   4  16   14.69    3.82
  -2   4  15    0.20    0.89
   2  -4 -15    0.35    1.29
  -2   4  15    1.96    2.05
   2  -4 -15    3.23    1.84
   2  -4 -15    3.21    2.73
   2  -4 -14   23.69    4.63
  -2   4  14   24.90    4.45
   2  -4 -14   27.68    3.79
  -2   4  14   19.56    2.70
   2  -4 -14   20.78    3.15
   2  -4 -13    4.74    2.47
  -2   4  13    6.61    2.62
  -2   4  13    6.00    1.64
   2  -4 -13    4.47    1.99
   2  -4 -13    5.88    1.87
   2  -4 -12    4.44    2.38
  -2   4  12    2.50    2.09
   2  -4 -12    2.71    1.35
  -2   4  12    3.20    1.17
   2  -4 -12    4.05    1.44
   2  -4 -11   17.74    3.06
  -2   4  11   11.04    2.91
   2  -4 -11    9.78    1.89
   2  -4 -11   18.49    3.85
  -2   4  11   10.51    1.73
   2  -4 -10    2.55    1.90
  -2   4  10   -0.18    1.06
   2  -4 -10    0.27    0.86
  -2   4  10   -0.18    0.70
   2  -4 -10    0.47    1.62
   2  -4  -9   45.61    4.27
   2  -4  -9   44.58    3.10
  -2   4   9   48.49    2.69
   2  -4  -9   45.26    5.14
   2  -4  -8   -0.31    1.58
  -2   4   8    0.35    0.41
   2  -4  -8    0.79    0.78
   2  -4  -8    1.72    1.41
   2  -4  -7   10.93    2.30
   2  -4  -7    6.27    1.96
  -2   4   7    8.27    0.83
   2  -4  -7    7.88    1.04
   2  -4  -6  365.32   10.68
   2  -4  -6  337.81   11.27
   2  -4  -6  349.58    5.18
   2  -4  -5  105.19    6.01
   2  -4  -5  108.42    5.75
   2  -4  -4   80.58    4.80
   2  -4  -4   68.15    4.67
   2  -4  -3    4.08    1.44
   2  -4  -3    3.21    1.27
  -2   4   3    2.59    1.16
   2  -4  -2   26.48    2.72
  -2   4   2   32.60    2.80
   2  -4  -2   26.87    2.76
  -2   4   2   29.29    1.31
   2  -4  -2   28.31    1.49
   2  -4  -1  296.44    8.19
   2  -4  -1  294.37    8.35
  -2   4   1  305.49    6.04
   2  -4  -1  305.87    5.89
  -2   4   1  302.91    8.31
   2  -4   0   94.64    4.58
  -2   4   0   96.20    4.59
  -2   4   0   93.27    4.78
   2  -4   0   95.42    3.85
  -2   4   0   96.12    3.92
   2  -4   1    1.16    0.88
  -2   4  -1   -0.30    1.09
  -2   4  -1    2.48    1.09
   2  -4   1    1.90    1.11
  -2   4  -1    0.48    0.73
  -2   4  -2  353.15    9.03
  -2   4  -2  347.65    8.76
  -2   4  -2  368.11    8.76
   2  -4   2  357.65    8.99
  -2   4  -3    5.51    1.23
  -2   4  -3    2.91    1.05
  -2   4  -3    4.58    1.42
  -2   4  -4  495.32   12.36
  -2   4  -5  142.95    7.11
  -2   4  -6  591.99   15.10
  -2   4  -7  241.26   10.16
  -2   4  -8  102.52    7.06
   2  -4   8   91.79    6.63
  -2   4  -9   90.82    6.93
   2  -4   9   69.34    6.00
   2  -4  10    4.93    2.18
   2  -4  11   15.86    3.46
   2  -4  12   -2.22    1.88
   2  -4  13    1.72    2.09
   2  -4  14   -1.38    1.92
   2  -4  15   -1.03    1.98
   2  -4  16   -0.21    1.75
   2  -4  17    3.40    2.88
   2  -4  18   -0.48    2.25
   2  -4  19    7.53    2.85
   2  -3 -21   -3.84    2.94
   2  -3 -20    9.02    4.00
   2  -3 -19   13.86    4.60
  -2   3  18    2.15    1.27
  -2   3  18    6.67    3.26
   2  -3 -18    8.27    3.81
  -2   3  17    2.02    1.21
  -2   3  17   -0.74    1.88
  -2   3  16   12.43    2.41
   2  -3 -16   16.33    4.55
  -2   3  16   13.17    3.38
   2  -3 -15   12.19    4.13
   2  -3 -15   13.53    2.84
  -2   3  15   16.47    3.84
  -2   3  15    8.50    2.17
   2  -3 -14   41.25    5.98
  -2   3  14   46.63    4.21
  -2   3  14   37.17    5.26
   2  -3 -14   43.88    4.27
  -2   3  13   -0.61    1.60
   2  -3 -13    2.38    3.20
   2  -3 -13    1.04    1.40
  -2   3  13    1.04    1.12
  -2   3  12   15.11    2.27
  -2   3  12   15.03    3.15
   2  -3 -12   19.43    4.24
   2  -3 -12   15.05    2.30
   2  -3 -11    4.86    2.84
   2  -3 -11    2.86    1.24
  -2   3  11    3.63    1.38
  -2   3  11    5.27    2.28
   2  -3 -10    3.52    2.64
  -2   3  10    0.91    0.85
  -2   3  10    0.25    1.52
   2  -3 -10    1.46    1.17
   2  -3  -9   50.51    5.12
   2  -3  -9   47.88    3.07
  -2   3   9   49.26    3.07
  -2   3   8    0.16    0.53
   2  -3  -8   -0.03    0.57
   2  -3  -8    1.13    2.10
  -2   3   7  172.31    4.42
   2  -3  -7  166.92    4.44
   2  -3  -7  162.28    8.04
   2  -3  -6    8.54    2.25
  -2   3   6    7.33    0.84
   2  -3  -6    6.93    0.85
   2  -3  -5   40.74    3.77
   2  -3  -5   38.98    1.49
   2  -3  -4  348.26    9.69
  -2   3   3    3.99    1.31
   2  -3  -3    7.42    1.66
   2  -3  -3    4.78    1.61
   2  -3  -2   86.51    4.33
  -2   3   2   80.47    4.00
   2  -3  -2   78.16    2.43
   2  -3  -2   75.61    4.02
  -2   3   2   78.02    2.06
   2  -3  -1   30.74    2.42
  -2   3   1   33.32    2.59
   2  -3  -1   30.80    1.90
   2  -3  -1   28.40    2.46
  -2   3   1   36.40    1.88
   2  -3   0   18.86    1.96
   2  -3   0   19.23    1.76
  -2   3   0   23.55    2.45
  -2   3   0   20.84    1.92
   2  -3   0   21.59    1.97
   2  -3   1 1375.20   14.47
  -2   3  -1 1355.95   14.33
  -2   3  -1 1348.35   15.49
   2  -3   1 1383.63   15.39
  -2   3  -1 1367.73   15.55
  -2   3  -2    1.61    0.74
  -2   3  -2    2.07    0.93
  -2   3  -2    0.92    1.06
  -2   3  -3  161.98    5.11
  -2   3  -3  161.88    6.44
  -2   3  -4  410.70   10.97
  -2   3  -4  409.99    8.05
  -2   3  -5  547.92   13.39
  -2   3  -6  253.54    9.71
  -2   3  -7   61.32    5.11
  -2   3  -8  225.11   10.09
   2  -3   8  210.14    9.65
   2  -3   9    3.86    2.12
  -2   3  -9    1.64    1.54
   2  -3  10   25.45    3.87
   2  -3  11    1.10    1.46
   2  -3  12   15.23    3.21
   2  -3  13   40.52    5.47
   2  -3  14    1.25    1.76
   2  -3  15    4.70    2.34
   2  -3  16   -0.92    2.02
   2  -3  17   -1.80    2.13
   2  -3  18    8.52    3.56
   2  -3  19   -0.36    2.12
   2  -2 -21    4.72    4.26
   2  -2 -20   13.07    4.89
  -2   2  19    1.66    1.74
   2  -2 -19    5.88    3.70
  -2   2  18    4.18    1.80
  -2   2  17   -0.06    1.52
  -2   2  17    0.06    2.33
   2  -2 -16   16.16    3.14
  -2   2  16   24.91    4.64
  -2   2  16   18.57    3.24
  -2   2  15    1.98    1.90
  -2   2  15    1.09    1.16
   2  -2 -15   -1.69    1.36
   2  -2 -14    0.50    1.32
  -2   2  14    0.24    1.52
  -2   2  14    1.85    1.26
  -2   2  13    9.72    2.04
  -2   2  13    9.55    2.82
   2  -2 -13    7.09    1.94
  -2   2  12   23.90    2.88
   2  -2 -12   16.46    2.49
  -2   2  12   16.69    3.32
  -2   2  11   17.97    3.35
   2  -2 -11   16.57    2.41
  -2   2  11   12.79    2.12
   2  -2 -10    7.00    1.51
  -2   2  10    9.33    2.36
  -2   2  10    9.55    1.77
  -2   2   9  160.59    8.19
   2  -2  -9  155.42    5.89
  -2   2   9  157.77    5.86
   2  -2  -8  204.53    6.24
  -2   2   8  204.09    6.11
   2  -2  -7    2.24    0.83
  -2   2   7    1.78    0.75
   2  -2  -6  131.45    4.00
  -2   2   6  129.30    4.00
   2  -2  -5  258.54    5.00
  -2   2   5  277.69    5.13
   2  -2  -4  194.58    3.90
   2  -2  -4  190.98    7.03
   2  -2  -3   87.21    4.39
  -2   2   3   87.62    4.13
   2  -2  -3   84.90    2.46
   2  -2  -2   13.48    1.06
  -2   2   2   17.04    2.00
   2  -2  -2   13.78    1.80
  -2   2   2   13.99    1.07
  -2   2   2   13.11    1.60
  -2   2   1 1328.84   13.54
   2  -2  -1 1288.66   13.24
   2  -2  -1 1319.70   11.30
  -2   2   1 1338.22   11.38
   2  -2   0 1240.07   11.64
   2  -2   0 1173.08   13.06
  -2   2   0 1219.91   12.51
  -2   2   0 1221.25   11.75
  -2   2  -1   83.12    2.87
   2  -2   1   77.43    2.82
   2  -2   1   74.05    3.13
  -2   2  -1   80.98    3.73
   2  -2   2  686.02    8.87
  -2   2  -2  685.61   11.72
  -2   2  -2  687.31    9.06
  -2   2  -2  686.20    8.34
  -2   2  -3   37.26    2.08
  -2   2  -3   37.95    3.12
  -2   2  -4  270.11    8.63
  -2   2  -4  264.90    5.21
  -2   2  -5  592.56    7.59
  -2   2  -5  589.98   13.74
  -2   2  -6  177.71    7.99
  -2   2  -7   84.13    5.91
   2  -2   7   73.62    5.36
  -2   2  -8    6.60    2.10
   2  -2   8    7.27    2.08
   2  -2   9  159.16    8.68
  -2   2  -9  177.53    9.23
  -2   2  -9  161.98    8.78
  -2   2 -10   16.60    3.19
   2  -2  10   10.27    2.88
   2  -2  11   12.62    3.04
   2  -2  12   85.18    7.19
   2  -2  13    8.05    2.68
   2  -2  14    2.27    2.02
   2  -2  15    0.62    2.21
   2  -2  16    2.58    2.04
   2  -2  17   -1.30    2.19
   2  -2  18   -5.70    2.92
   2  -2  19   13.95    4.15
   2  -2  20   -2.84    2.80
  -2   1  20    2.17    1.57
  -2   1  19    2.51    1.79
  -2   1  18    7.55    2.56
  -2   1  17   -0.25    1.46
  -2   1  16   -0.47    1.58
  -2   1  16   -1.10    1.25
  -2   1  15   -0.95    1.50
  -2   1  15    2.69    2.32
   2  -1 -15   -1.14    1.64
  -2   1  14   -1.49    2.09
  -2   1  14    0.06    1.18
   2  -1 -14    0.60    1.63
  -2   1  13   33.43    4.61
  -2   1  13   38.89    4.00
   2  -1 -13   36.15    3.96
  -2   1  12    1.91    1.25
   2  -1 -12    0.63    1.34
  -2   1  12    4.49    2.08
   2  -1 -11   13.43    2.36
  -2   1  11   12.03    2.74
  -2   1  11   12.18    2.14
  -2   1  10   89.13    6.34
   2  -1 -10  100.00    5.49
  -2   1  10   99.56    5.40
  -2   1   9   16.27    2.67
  -2   1   9   16.62    2.12
   2  -1  -9   12.37    1.96
  -2   1   8    0.75    0.80
   2  -1  -8    0.90    0.79
   2  -1  -7  102.21    4.41
  -2   1   7  103.78    4.46
   2  -1  -6   59.23    3.11
  -2   1   6   59.18    3.13
  -2   1   5   19.68    1.70
   2  -1  -5   18.66    1.65
   2  -1  -4    6.53    0.98
   2  -1  -3   19.57    1.50
  -2   1   3   22.99    2.09
  -2   1   2 1077.94   12.46
   2  -1  -2 1080.61   10.68
  -2   1   2 1066.72   10.60
   2  -1  -1  423.82    6.63
  -2   1   1  428.96    7.14
   2  -1   0  147.79    3.15
  -2   1   0  143.52    4.51
  -2   1   0  140.46    3.19
  -2   1  -1 1446.22   15.58
  -2   1  -2  153.13    5.58
   2  -1   2  152.17    3.43
  -2   1  -3  122.90    5.44
  -2   1  -4  282.21    8.88
  -2   1  -5   76.68    5.06
  -2   1  -6  564.69   14.26
   2  -1   6  572.15   14.07
   2  -1   7   -0.11    1.60
  -2   1  -7    1.10    1.00
  -2   1  -8   94.21    6.55
   2  -1   8   86.64    6.19
  -2   1  -9   15.19    2.90
   2  -1   9   14.77    2.91
  -2   1  -9   13.37    2.71
   2  -1  10   61.71    5.70
  -2   1 -10   65.78    6.05
   2  -1  11   10.01    2.86
   2  -1  12    1.68    1.87
   2  -1  13    0.32    1.60
   2  -1  14   11.87    2.96
   2  -1  15    6.50    3.01
   2  -1  16   -2.38    2.10
   2  -1  17   -1.51    2.51
   2  -1  18    6.19    3.03
   2  -1  19    3.60    2.06
   2  -1  20    6.28    3.41
  -2   0  21    2.98    1.58
  -2   0  20    7.71    2.68
  -2   0  19    0.98    1.65
  -2   0  18    8.13    2.53
  -2   0  17    2.52    1.63
  -2   0  16   15.51    3.61
  -2   0  16   16.29    3.25
  -2   0  15   18.99    3.27
  -2   0  15   18.79    4.02
  -2   0  14   15.61    3.43
  -2   0  14   15.09    2.81
   2   0 -14   16.85    3.10
  -2   0  13   27.38    4.12
  -2   0  13   28.30    3.66
   2   0 -13   33.94    4.02
  -2   0  12    0.08    1.20
  -2   0  12    0.03    1.26
   2   0 -12    2.27    1.36
  -2   0  11   29.95    3.91
   2   0 -11   31.42    3.54
  -2   0  11   30.97    3.41
   2   0 -10   41.69    3.74
  -2   0  10   40.20    4.27
  -2   0  10   38.94    3.57
   2   0  -9   12.55    2.00
  -2   0   9   12.67    2.45
  -2   0   9   13.49    2.16
  -2   0   8    3.63    1.22
   2   0  -8    1.57    0.82
  -2   0   8    1.74    1.33
   2   0  -7   52.41    3.47
  -2   0   7   48.96    3.38
  -2   0   6   20.42    2.16
   2   0  -6   23.35    2.18
  -2   0   5  605.91   10.28
   2   0  -5  603.90   10.21
   2   0  -4  666.65   10.57
  -2   0   4  628.48    9.92
   2   0  -4  636.61    9.93
  -2   0   3 1436.52   14.35
   2   0  -3 1459.86   14.28
   2   0  -3 1438.73   14.30
  -2   0   2 2472.40   17.29
  -2   0   2 2488.15   18.57
  -2   0   1  555.41    8.99
  -2   0   0  407.34    8.10
  -2   0  -1   32.54    2.52
  -2   0  -2   10.06    1.65
  -2   0  -3  337.51    9.02
   2   0   4   37.41    3.41
  -2   0  -4   32.20    3.02
   2   0   5   95.96    5.57
  -2   0  -5   95.23    5.53
   2   0   6    0.57    1.25
  -2   0  -6    1.96    1.39
  -2   0  -7  190.01    8.65
   2   0   7  170.98    8.06
  -2   0  -8  147.30    8.07
  -2   0  -8  153.38    8.14
   2   0   8  151.16    7.92
  -2   0  -9   56.04    5.32
  -2   0  -9   54.53    5.10
   2   0   9   49.74    4.87
  -2   0 -10   89.09    6.99
   2   0  10   90.25    6.85
   2   0  11    3.84    1.81
   2   0  12   15.31    3.30
   2   0  13    4.09    2.38
   2   0  14    4.22    2.96
   2   0  15    7.41    2.62
   2   0  16    4.29    2.39
  -2   0 -16   10.01    3.39
  -2   0 -17    3.28    2.57
   2   0  17   -0.06    2.15
  -2   0 -18    0.94    2.43
   2   0  18    8.90    3.32
   2   0  19   -3.32    2.72
   2   0  20    8.40    3.50
  -2  -1  22   -6.81    3.01
  -2  -1  21    2.57    2.13
  -2  -1  20   -2.63    2.53
  -2  -1  19   -1.12    1.72
  -2  -1  18    9.04    3.03
  -2  -1  17   -0.20    1.77
  -2  -1  16    8.42    2.40
  -2  -1  15    0.24    1.31
  -2  -1  14   38.87    4.98
  -2  -1  14   47.78    5.03
  -2  -1  13   14.56    2.75
  -2  -1  13   17.13    3.32
   2   1 -13   20.82    3.34
  -2  -1  12    2.38    1.43
   2   1 -12    5.95    1.83
  -2  -1  12    4.47    1.74
   2   1 -11   34.99    3.86
  -2  -1  11   38.03    4.35
  -2  -1  11   32.85    3.73
  -2  -1  10   34.72    3.94
   2   1 -10   43.51    4.08
  -2  -1  10   35.52    3.70
   2   1  -9   45.29    3.96
  -2  -1   9   51.57    4.41
  -2  -1   9   45.54    3.98
  -2  -1   8   17.10    2.39
  -2  -1   8   11.93    2.15
   2   1  -8   12.39    2.04
   2   1  -7    1.23    0.99
  -2  -1   7    0.18    0.97
  -2  -1   7    0.83    0.98
  -2  -1   6  221.70    7.24
   2   1  -6  227.96    7.31
  -2  -1   5   24.61    2.48
   2   1  -5   26.34    2.43
   2   1  -4    5.42    1.02
  -2  -1   4    6.70    1.44
   2   1  -4    5.56    1.28
   2   1  -3 1577.27   13.68
   2   1  -3 1579.36   16.63
  -2  -1   2 1304.03   15.04
  -2  -1   2 1309.03   11.20
  -2  -1   1  374.93    8.17
  -2  -1   0   25.26    2.26
   2   1   1   15.19    0.97
  -2  -1  -1   16.52    1.89
   2   1   2  395.20    5.08
  -2  -1  -2  401.43    9.55
  -2  -1  -2  397.91    4.90
  -2  -1  -3   34.22    3.03
  -2  -1  -3   37.48    1.78
  -2  -1  -4  278.78    5.73
   2   1   4  278.11    9.06
  -2  -1  -4  282.21    8.99
  -2  -1  -5    6.17    1.53
  -2  -1  -5    4.98    1.12
   2   1   5    3.96    1.52
  -2  -1  -5    5.19    1.48
  -2  -1  -6  285.07    7.57
   2   1   6  299.54   10.03
  -2  -1  -6  296.16   10.27
  -2  -1  -7   25.51    2.69
   2   1   7   24.78    3.20
  -2  -1  -7   23.91    3.20
  -2  -1  -8  104.75    6.71
   2   1   8   92.56    6.24
  -2  -1  -8   96.76    6.60
  -2  -1  -8   91.02    5.21
  -2  -1  -9   17.54    2.95
  -2  -1  -9   17.75    3.18
  -2  -1  -9   19.97    3.30
   2   1   9   11.76    2.67
  -2  -1 -10    7.89    2.43
  -2  -1 -10    9.58    2.53
   2   1  11    0.94    1.81
  -2  -1 -11    2.38    1.99
  -2  -1 -12    7.52    2.60
   2   1  12    9.97    2.87
  -2  -1 -13   54.60    5.53
   2   1  13   52.70    5.80
   2   1  14   12.00    3.14
  -2  -1 -14   11.07    3.05
   2   1  15   -1.27    1.92
  -2  -1 -15    0.81    2.18
   2   1  16    4.17    2.45
  -2  -1 -16   12.07    3.48
   2   1  17   -0.36    1.99
  -2  -1 -17   -1.21    1.81
  -2  -1 -18    8.03    3.37
   2   1  18   -0.36    2.05
   2   1  19    5.00    3.16
   2   1  20    0.63    1.99
  -2  -2  22    8.58    3.22
  -2  -2  21   -5.17    2.83
  -2  -2  20    1.59    1.95
  -2  -2  19    0.28    2.10
  -2  -2  18    2.03    2.03
  -2  -2  17    3.73    2.11
  -2  -2  16    3.12    1.91
  -2  -2  15   23.69    3.96
  -2  -2  14    2.10    1.57
  -2  -2  13  144.02    9.07
  -2  -2  13  139.39    8.46
  -2  -2  12   32.33    4.25
  -2  -2  12   32.75    3.98
   2   2 -12   29.32    3.93
  -2  -2  11   48.41    4.84
   2   2 -11   51.00    4.78
  -2  -2  11   49.26    4.69
  -2  -2  10   29.45    3.54
   2   2 -10   33.44    3.76
  -2  -2  10   29.95    3.60
   2   2  -9   55.78    4.57
  -2  -2   9   55.76    4.54
  -2  -2   9   48.49    4.23
  -2  -2   8   40.36    3.74
   2   2  -8   42.07    3.75
  -2  -2   8   40.05    3.63
  -2  -2   7   46.49    3.60
   2   2  -7   56.25    4.14
  -2  -2   7   50.48    3.98
  -2  -2   6    0.24    0.92
  -2  -2   6    0.08    0.75
   2   2  -6    0.21    0.75
  -2  -2   5  829.59   12.13
  -2  -2   5  827.05   14.34
   2   2  -5  846.82   14.39
   2   2  -4 1016.21   15.07
   2   2  -3  556.82    7.28
   2   2  -3  551.63   10.76
  -2  -2   2  323.38    4.78
  -2  -2   2  323.02    8.30
   2   2  -2  314.97    8.06
  -2  -2   1   23.48    2.30
  -2  -2   0  126.23    5.26
   2   2   1  139.45    3.96
  -2  -2  -1  139.92    5.69
  -2  -2  -2    7.95    1.61
  -2  -2  -2    6.91    0.96
   2   2   2    7.27    1.07
   2   2   2    5.46    1.24
  -2  -2  -3    1.66    0.93
  -2  -2  -3    4.15    1.08
   2   2   3    2.49    1.50
   2   2   3    3.28    0.95
  -2  -2  -3    3.05    0.80
  -2  -2  -4    8.09    1.23
   2   2   4   10.39    2.05
  -2  -2  -4   11.39    1.76
  -2  -2  -4    6.77    1.68
  -2  -2  -5    5.54    1.32
  -2  -2  -5    3.87    1.18
   2   2   5    4.32    0.75
   2   2   5    4.57    1.70
  -2  -2  -5    3.23    1.40
   2   2   6   18.25    2.82
  -2  -2  -6   21.17    2.29
   2   2   6   19.86    2.89
  -2  -2  -6   20.40    2.95
   2   2   7  191.33    8.51
  -2  -2  -7  193.43    8.82
  -2  -2  -7  195.48    7.07
  -2  -2  -8   89.52    5.19
   2   2   8   90.34    6.24
  -2  -2  -8  101.95    6.68
  -2  -2  -8   96.77    6.56
  -2  -2  -9   16.81    2.66
  -2  -2  -9   27.56    3.82
   2   2   9   16.33    3.06
  -2  -2  -9   24.14    3.53
  -2  -2 -10   81.83    6.61
   2   2  10   78.53    6.27
  -2  -2 -10   77.32    5.55
  -2  -2 -11    1.32    1.53
   2   2  11   -1.81    1.77
  -2  -2 -12    0.29    1.73
   2   2  12    1.38    1.55
   2   2  13    1.24    1.59
  -2  -2 -13   -0.80    1.83
  -2  -2 -14   -3.28    2.41
   2   2  14   -2.14    1.60
  -2  -2 -15    0.98    1.73
   2   2  15   -0.13    1.99
   2   2  16    4.91    2.60
  -2  -2 -16   -2.12    2.29
   2   2  17    1.80    1.79
  -2  -2 -17    8.91    2.93
   2   2  18   -6.17    2.88
   2   2  19    0.63    1.88
  -2  -3  22   -4.59    2.82
  -2  -3  21    0.22    2.19
  -2  -3  20    7.09    2.58
  -2  -3  19    1.31    2.43
  -2  -3  18   -0.91    1.76
  -2  -3  17    0.50    2.00
  -2  -3  16    4.72    2.12
  -2  -3  15    2.48    1.85
  -2  -3  14   71.32    6.56
  -2  -3  13   20.00    3.47
  -2  -3  12    6.76    2.31
   2   3 -11  298.07   11.79
  -2  -3  11  274.20   11.10
  -2  -3  11  290.15   11.69
   2   3 -10   15.51    2.76
  -2  -3  10   11.37    2.42
  -2  -3  10   18.08    2.84
   2   3  -9   83.20    5.77
  -2  -3   9   75.21    5.17
  -2  -3   9   82.04    5.81
  -2  -3   8   29.21    3.04
   2   3  -8   30.48    3.41
  -2  -3   8   30.49    3.38
  -2  -3   7   33.32    2.98
   2   3  -7   37.93    3.66
  -2  -3   7   32.28    3.44
  -2  -3   6  100.97    4.58
   2   3  -6  100.80    5.62
  -2  -3   5  389.01    7.92
   2   3  -5  402.45   10.78
  -2  -3   4  427.03    7.14
   2   3  -4  428.92   10.65
  -2  -3   3 1450.52   10.38
   2   3  -3 1448.92   10.23
   2   3  -3 1489.82   19.28
   2   3  -2  120.61    5.36
  -2  -3   1  206.66    7.15
  -2  -3   0   12.59    1.89
   2   3   0   16.06    1.72
   2   3   0   13.15    2.09
   2   3   1  302.33    7.02
   2   3   1  290.48    8.82
  -2  -3  -1  297.24    8.85
  -2  -3  -1  306.94    5.90
   2   3   2  240.75    6.42
  -2  -3  -2  235.29    6.28
  -2  -3  -2  246.47    8.25
   2   3   2  253.22    8.44
  -2  -3  -2  248.36    6.30
   2   3   3  103.75    4.38
  -2  -3  -3   95.32    4.38
  -2  -3  -3   98.08    5.41
   2   3   3  101.58    5.53
  -2  -3  -3   89.43    4.01
  -2  -3  -4  109.21    5.19
   2   3   4  106.58    5.91
  -2  -3  -4  107.88    5.92
  -2  -3  -4  106.18    4.57
   2   3   4  107.30    4.73
  -2  -3  -5   11.66    1.72
  -2  -3  -5   16.15    2.29
   2   3   5   12.31    1.43
   2   3   5   13.35    2.38
  -2  -3  -5   13.18    2.33
   2   3   6    4.65    1.06
   2   3   6    3.79    1.66
  -2  -3  -6    3.81    1.19
  -2  -3  -6    5.67    1.69
  -2  -3  -7   -0.02    0.98
   2   3   7    2.62    1.73
  -2  -3  -7    1.09    1.27
  -2  -3  -8    3.00    1.51
  -2  -3  -8    6.84    1.94
  -2  -3  -8    4.89    1.67
   2   3   8    7.22    2.17
   2   3   9   10.67    2.54
  -2  -3  -9   12.39    2.66
  -2  -3  -9   14.11    2.52
  -2  -3  -9   14.67    3.01
   2   3  10   17.36    3.07
  -2  -3 -10   12.76    2.72
  -2  -3 -10   15.36    2.85
  -2  -3 -11   60.73    5.21
   2   3  11   55.77    5.53
  -2  -3 -12    6.22    2.28
   2   3  12    1.81    1.56
  -2  -3 -13    2.14    1.84
   2   3  13    3.04    1.77
  -2  -3 -14    2.20    2.08
   2   3  14    7.13    2.71
   2   3  15    0.82    1.63
  -2  -3 -15    1.51    1.96
  -2  -3 -16   -1.12    1.57
   2   3  16    1.01    2.04
  -2  -3 -17    1.67    1.78
   2   3  17    0.01    1.75
   2   3  18    3.99    2.77
  -2  -4  21    0.25    2.40
  -2  -4  20   -3.55    2.99
  -2  -4  19   -2.79    2.60
  -2  -4  18    0.10    2.29
  -2  -4  17    2.23    1.50
  -2  -4  16    1.74    2.03
  -2  -4  15   -0.24    1.83
  -2  -4  14    2.25    1.60
  -2  -4  13  115.81    8.32
  -2  -4  12   51.48    5.43
  -2  -4  11   27.78    3.89
   2   4 -10  202.92    9.79
  -2  -4  10  209.96    9.90
   2   4  -9   84.92    6.15
  -2  -4   9   69.88    5.62
   2   4  -8  228.25    9.63
  -2  -4   8  207.60    9.24
   2   4  -7   73.33    5.31
   2   4  -6   24.91    3.03
   2   4  -5  271.15    9.40
   2   4  -4   73.55    4.73
   2   4  -3   98.85    5.35
   2   4  -2  225.53    7.88
   2   4  -2  228.25    8.32
   2   4  -1    1.63    1.26
  -2  -4   1    1.17    0.90
   2   4  -1    0.66    0.81
  -2  -4   0  136.68    6.30
   2   4   0  145.10    5.69
   2   4   0  135.87    6.42
  -2  -4  -1   56.46    4.11
   2   4   1   52.81    3.43
   2   4   1   54.85    4.14
   2   4   2  221.17    7.01
  -2  -4  -2  223.03    7.07
   2   4   2  221.52    8.26
  -2  -4  -2  212.26    8.08
  -2  -4  -2  213.05    5.77
  -2  -4  -3  143.63    5.77
  -2  -4  -3  140.24    5.32
   2   4   3  135.75    6.62
   2   4   3  142.92    5.84
  -2  -4  -3  147.47    6.87
   2   4   4   45.30    4.02
   2   4   4   45.92    3.49
  -2  -4  -4   51.50    3.58
  -2  -4  -4   51.08    4.20
  -2  -4  -4   48.47    3.47
   2   4   5    5.14    1.55
  -2  -4  -5    4.69    1.68
  -2  -4  -5    3.30    1.28
   2   4   5    2.12    0.76
   2   4   5    2.82    1.54
  -2  -4  -5    3.36    1.14
  -2  -4  -6    1.13    1.44
   2   4   6    0.19    0.76
  -2  -4  -6   -0.45    1.23
   2   4   6    3.59    1.86
  -2  -4  -7    6.62    1.67
   2   4   7    8.45    2.41
  -2  -4  -7    7.43    2.00
  -2  -4  -8   11.67    2.29
   2   4   8   15.16    2.89
  -2  -4  -8   15.50    2.82
   2   4   9   58.35    5.29
  -2  -4  -9   53.59    5.24
  -2  -4  -9   40.54    4.05
   2   4  10    2.35    1.62
  -2  -4 -10    2.44    1.74
   2   4  11   16.92    3.23
  -2  -4 -11   18.78    3.14
  -2  -4 -12    1.54    1.42
   2   4  12    0.93    1.54
   2   4  13   10.44    2.73
  -2  -4 -13   13.01    3.17
  -2  -4 -14    3.14    1.90
   2   4  14    1.98    1.88
  -2  -4 -15    2.49    1.96
   2   4  15    4.40    2.34
   2   4  16   -2.89    2.31
  -2  -4 -16   -1.16    1.88
   2   4  17    4.40    2.17
  -2  -4 -17   -1.07    1.92
  -2  -5  21   -2.30    3.02
  -2  -5  20   -0.36    1.97
  -2  -5  19   -5.24    2.80
  -2  -5  18   -3.78    2.50
  -2  -5  17    3.41    2.45
  -2  -5  16    1.77    1.78
  -2  -5  15   -0.04    2.02
  -2  -5  14    2.42    1.69
  -2  -5  13   75.23    6.97
  -2  -5  12   -1.15    1.50
  -2  -5  11   74.06    6.49
  -2  -5  10   78.25    6.41
   2   5  -9  280.93   11.54
  -2  -5   9  266.86   11.36
  -2  -5   8  132.71    7.74
   2   5  -8  149.98    8.16
   2   5  -7   70.68    5.47
   2   5  -6  363.72   11.99
   2   5  -5    0.62    1.11
   2   5  -4   52.51    4.49
   2   5  -4   51.28    4.26
   2   5  -3  171.27    7.79
   2   5  -3  170.62    7.50
   2   5  -2    6.17    1.54
   2   5  -2    5.60    1.69
   2   5  -1  267.20    8.79
   2   5  -1  249.14    8.74
   2   5  -1  267.69    9.47
   2   5   0   62.20    4.20
  -2  -5   0   58.36    4.44
   2   5   0   66.42    4.52
   2   5   0   61.78    4.61
   2   5   1   81.34    4.78
  -2  -5  -1   75.36    5.04
   2   5   1   76.34    5.15
   2   5   2  153.45    6.58
   2   5   2  144.02    7.01
  -2  -5  -2  135.49    6.78
  -2  -5  -3   20.81    2.55
  -2  -5  -3   19.64    2.69
   2   5   3   19.50    2.49
   2   5   3   18.66    2.89
  -2  -5  -4    8.84    1.94
   2   5   4   13.30    2.29
  -2  -5  -4   10.75    1.95
   2   5   4   10.83    2.28
   2   5   5    1.46    1.33
  -2  -5  -5    1.33    1.18
   2   5   5    1.14    1.16
   2   5   5    0.62    1.04
  -2  -5  -5   -0.29    1.09
   2   5   6    3.80    1.39
  -2  -5  -6    1.23    1.21
   2   5   6    1.26    0.97
   2   5   6    0.70    1.37
  -2  -5  -6    2.15    1.53
  -2  -5  -7   14.21    2.75
   2   5   7   17.09    2.34
  -2  -5  -7   14.96    2.45
   2   5   7   13.58    2.95
  -2  -5  -8   27.60    3.33
  -2  -5  -8   24.85    3.63
   2   5   8   34.72    4.28
   2   5   8   26.65    3.67
  -2  -5  -9   62.45    5.18
   2   5   9   66.17    5.61
  -2  -5  -9   64.31    5.76
  -2  -5 -10    2.03    1.60
   2   5  10    8.87    2.56
  -2  -5 -11   10.23    2.39
   2   5  11    9.73    2.61
  -2  -5 -12   -0.68    1.72
   2   5  12   -1.77    2.02
  -2  -5 -13   -0.90    1.83
   2   5  13    1.50    1.66
   2   5  14    5.50    2.35
  -2  -5 -14    4.37    2.02
  -2  -5 -15   -2.48    1.87
   2   5  15    1.06    1.80
   2   5  16   14.00    3.23
  -2  -5 -16   14.64    3.48
  -2  -6  20    5.75    2.90
  -2  -6  19    1.39    2.15
  -2  -6  18   -1.80    2.87
  -2  -6  17    5.70    2.60
  -2  -6  16    9.08    3.14
  -2  -6  15   -1.72    1.77
  -2  -6  14   19.56    3.99
  -2  -6  13    4.08    2.00
  -2  -6  12  152.64    9.78
  -2  -6  11   32.19    4.48
  -2  -6  10  114.32    8.00
  -2  -6   9  217.02   10.63
   2   6  -8   47.56    4.85
  -2  -6   8   49.71    5.10
   2   6  -7   50.29    4.84
   2   6  -6    1.92    1.17
   2   6  -5  123.73    7.16
   2   6  -4  147.98    7.59
   2   6  -4  145.28    7.76
   2   6  -3   15.81    2.77
   2   6  -3   16.99    2.65
   2   6  -2  103.72    6.15
   2   6  -2  103.09    6.35
   2   6  -1    4.72    1.75
   2   6  -1    3.63    1.27
  -2  -6   0   98.14    5.97
   2   6   0   95.53    5.70
   2   6   0   86.35    5.69
  -2  -6  -1  188.98    8.34
   2   6   1  161.16    7.26
   2   6   1  174.03    8.10
  -2  -6  -1  172.03    4.19
  -2  -6  -2   41.70    4.06
   2   6   2   42.32    4.10
  -2  -6  -3    0.94    0.91
  -2  -6  -3    0.66    1.17
  -2  -6  -4   16.86    2.62
   2   6   4   14.10    2.56
  -2  -6  -4   20.08    2.97
  -2  -6  -5    1.61    1.13
  -2  -6  -5    1.40    1.23
   2   6   5    0.70    1.46
  -2  -6  -6   -1.27    1.61
  -2  -6  -6    1.53    1.23
   2   6   6    1.76    1.57
   2   6   7   25.67    3.04
  -2  -6  -7   15.42    2.70
  -2  -6  -7   15.50    2.90
   2   6   7   19.62    3.31
  -2  -6  -8   30.31    3.99
   2   6   8   33.37    3.50
  -2  -6  -8   28.59    3.63
   2   6   8   33.54    4.24
  -2  -6  -9    1.09    1.42
   2   6   9    0.21    1.62
  -2  -6  -9    2.00    1.35
   2   6  10    1.70    1.52
  -2  -6 -10   -0.03    1.41
  -2  -6 -11   41.32    4.78
   2   6  11   42.92    4.93
  -2  -6 -12   -1.12    1.96
   2   6  12    4.38    2.22
  -2  -6 -13   14.63    3.10
   2   6  13   12.30    2.94
   2   6  14    0.83    1.55
  -2  -6 -14    3.74    2.05
  -2  -6 -15   10.91    2.83
   2   6  15   15.02    3.28
  -2  -7  19    2.89    2.19
  -2  -7  18    2.06    2.02
  -2  -7  17   13.20    3.75
  -2  -7  16    0.73    2.00
  -2  -7  15   21.93    4.40
  -2  -7  14   11.72    3.34
  -2  -7  13  147.55   10.39
  -2  -7  12    7.03    2.65
  -2  -7  11  153.95    9.97
  -2  -7  10   87.83    7.39
  -2  -7   9    1.23    1.30
  -2  -7   8  196.29   10.32
  -2  -7   7    1.28    1.41
  -2  -7   6   59.51    5.45
   2   7  -6   61.60    5.50
   2   7  -5  166.49    8.97
  -2  -7   5  159.32    8.57
   2   7  -5  167.33    8.68
   2   7  -4   16.35    2.78
   2   7  -4   13.86    2.76
   2   7  -3   98.61    6.69
   2   7  -3  105.36    6.61
   2   7  -2   -0.97    1.34
   2   7  -2    1.12    1.04
   2   7  -2    1.89    1.40
   2   7  -1  268.69   10.18
   2   7  -1  273.24   10.80
   2   7   0   16.24    2.79
   2   7   0   18.35    2.74
   2   7   1    0.85    1.38
  -2  -7  -1    0.01    0.31
  -2  -7  -1   -1.92    1.48
   2   7   1   -0.38    1.12
  -2  -7  -2   35.37    3.91
  -2  -7  -2   42.22    2.56
   2   7   2   41.06    3.93
   2   7   2   45.91    4.60
   2   7   3   48.97    4.69
  -2  -7  -3   47.27    4.52
   2   7   4    8.89    2.24
  -2  -7  -4    1.74    1.46
  -2  -7  -4    7.05    1.97
   2   7   4    6.56    2.16
   2   7   5    3.02    2.01
  -2  -7  -5    0.09    1.23
  -2  -7  -5    0.38    0.97
   2   7   5    0.39    1.65
   2   7   6    2.32    1.63
  -2  -7  -6   -0.13    1.01
  -2  -7  -6    3.11    1.65
   2   7   6    2.82    1.65
  -2  -7  -7    8.83    2.44
   2   7   7   13.30    3.05
  -2  -7  -7   10.45    2.45
   2   7   7   12.80    2.92
  -2  -7  -8    1.02    1.26
   2   7   8    1.11    1.46
  -2  -7  -8    0.10    1.22
   2   7   9    8.10    2.50
  -2  -7  -9    6.15    2.25
  -2  -7 -10    1.24    1.23
   2   7  10   -0.45    1.71
   2   7  11   -0.47    1.76
  -2  -7 -11   -0.07    1.47
  -2  -7 -12   17.61    3.61
   2   7  12   17.69    3.35
  -2  -7 -13    3.39    2.22
   2   7  13    0.10    1.62
  -2  -7 -14   28.55    4.54
   2   7  14   30.84    4.47
  -2  -7 -15    4.07    2.04
  -2  -8  19   22.52    4.99
  -2  -8  18   -0.02    2.04
  -2  -8  17   12.43    3.89
  -2  -8  16    4.87    3.19
  -2  -8  15    0.35    1.93
  -2  -8  14   55.43    6.78
  -2  -8  13    3.87    2.19
  -2  -8  12   61.19    6.73
  -2  -8  11  101.01    8.42
  -2  -8  10   96.91    8.03
  -2  -8   9  110.11    8.27
  -2  -8   8   -0.09    1.52
  -2  -8   7  170.72    9.75
  -2  -8   6   73.04    6.35
   2   8  -5   26.80    3.87
  -2  -8   5   23.32    3.58
   2   8  -4  238.86   11.01
   2   8  -4  260.34   11.12
   2   8  -3    1.05    1.27
   2   8  -3    4.30    1.63
   2   8  -3    2.74    1.51
   2   8  -2  107.37    7.12
   2   8  -2  104.53    6.76
   2   8  -2   92.07    6.69
   2   8  -1  212.00    9.84
   2   8  -1  193.25    9.10
   2   8  -1  195.42    9.60
   2   8   0   35.83    4.15
   2   8   0   27.35    3.58
   2   8   0   26.56    3.35
   2   8   1   12.20    2.60
   2   8   1   11.74    2.47
   2   8   1   14.34    2.65
   2   8   2   -0.56    1.31
  -2  -8  -2   -1.85    1.23
  -2  -8  -2   -0.13    0.48
   2   8   2   -0.63    1.26
   2   8   2    0.33    0.94
   2   8   3    5.18    1.95
  -2  -8  -3    6.43    1.23
  -2  -8  -3    6.58    1.96
   2   8   3    4.89    1.45
   2   8   3    7.02    2.07
  -2  -8  -4   19.55    3.15
  -2  -8  -4   16.53    2.95
   2   8   4   19.88    3.33
  -2  -8  -4   15.22    2.02
   2   8   4   13.30    3.00
   2   8   5    1.58    1.25
  -2  -8  -5    1.54    1.52
  -2  -8  -5    2.48    1.42
   2   8   5    4.46    1.94
  -2  -8  -6    3.51    1.65
   2   8   6    8.77    2.32
  -2  -8  -6    5.39    1.72
   2   8   6   10.70    2.64
  -2  -8  -7    7.91    2.14
   2   8   7    5.71    2.20
   2   8   7    5.87    1.98
  -2  -8  -7    7.75    2.37
   2   8   8    0.98    1.67
   2   8   8    1.54    1.71
  -2  -8  -8    3.34    1.55
  -2  -8  -9    2.51    1.70
   2   8   9    2.52    1.87
  -2  -8 -10    1.00    1.52
   2   8  10    0.49    1.40
  -2  -8 -11    7.93    2.53
   2   8  11   13.25    2.95
  -2  -8 -12    6.63    2.48
   2   8  12    5.13    2.30
  -2  -8 -13   18.37    3.81
  -2  -8 -14    4.91    2.66
  -2  -9  18    2.41    2.18
  -2  -9  17   20.04    5.08
  -2  -9  16    4.84    2.74
  -2  -9  15   20.89    4.55
  -2  -9  14    6.18    3.13
  -2  -9  13   38.10    5.75
  -2  -9  12   47.07    6.26
  -2  -9  11   11.42    3.35
  -2  -9  10   76.61    7.40
  -2  -9   9    7.68    2.63
  -2  -9   8  100.89    8.06
  -2  -9   7   -0.29    1.29
   2   9  -6   69.98    6.58
  -2  -9   6   76.16    6.67
   2   9  -5  119.27    8.36
   2   9  -4    0.72    1.37
   2   9  -3  260.55   11.81
   2   9  -2    8.44    2.44
   2   9  -2   13.16    2.76
   2   9  -1  104.66    7.04
   2   9  -1   94.46    7.04
   2   9   0   30.17    3.95
   2   9   0   34.25    4.02
   2   9   1   10.73    2.71
   2   9   1   11.50    2.47
   2   9   2    4.56    1.60
   2   9   2    6.84    2.13
  -2  -9  -3    0.26    0.52
   2   9   3   -1.02    0.90
   2   9   3   -0.03    1.33
  -2  -9  -4    1.58    1.31
   2   9   4    0.02    1.19
  -2  -9  -4   -0.59    0.81
   2   9   4   -1.66    1.80
  -2  -9  -5   11.99    1.98
  -2  -9  -5   10.52    2.51
  -2  -9  -5   10.35    2.77
   2   9   5   10.28    2.57
   2   9   5    8.71    2.12
   2   9   5   12.05    2.90
  -2  -9  -6   -0.67    1.54
   2   9   6    1.83    1.79
   2   9   6    0.85    1.64
  -2  -9  -7   -0.13    1.18
   2   9   7   -1.05    1.38
  -2  -9  -7    2.35    1.26
   2   9   7    1.67    1.85
   2   9   8   -2.14    2.03
   2   9   8   -0.85    1.71
  -2  -9  -8    0.39    1.59
  -2  -9  -9    2.14    2.01
   2   9   9    1.80    1.48
  -2  -9 -10   14.29    3.34
   2   9  10   17.54    3.32
   2   9  11    0.10    1.69
  -2  -9 -11   -0.77    1.63
  -2  -9 -12    3.09    1.92
  -2  -9 -13    1.19    1.59
  -2  -9 -14    3.66    1.77
  -2 -10  17    5.56    3.52
  -2 -10  16    7.65    3.09
  -2 -10  15    0.41    2.31
  -2 -10  14   52.83    7.10
  -2 -10  13   61.38    7.45
  -2 -10  12   23.52    4.74
  -2 -10  11   71.98    7.58
  -2 -10  10   20.29    4.14
  -2 -10   9   60.03    6.69
  -2 -10   8   58.53    6.47
   2  10  -7   44.74    5.65
  -2 -10   7   36.64    5.09
  -2 -10   6   66.23    6.50
   2  10  -6   68.24    6.76
   2  10  -5   22.07    4.00
   2  10  -4   78.09    6.98
   2  10  -3   -0.63    1.43
   2  10  -2   59.93    6.07
   2  10  -1   50.13    5.41
   2  10   0   -0.77    1.80
   2  10   1    4.49    1.87
   2  10   2    0.98    1.19
   2  10   2    2.52    1.91
   2  10   3    4.55    1.76
   2  10   3   10.89    2.65
  -2 -10  -4    0.02    0.54
   2  10   4   -1.46    1.87
   2  10   4   -2.65    1.99
   2  10   4    3.18    1.60
   2  10   5   -0.42    1.95
   2  10   5   -0.65    1.71
   2  10   5    1.81    1.23
   2  10   6    0.24    1.49
   2  10   6   -0.81    1.39
   2  10   7    3.73    2.22
  -2 -10  -7   -1.93    1.91
   2  10   7   -1.03    1.74
   2  10   8    4.55    2.03
   2  10   8    1.14    1.82
  -2 -10  -9    5.06    2.29
   2  10   9    7.11    2.67
   2  10   9   -0.30    1.57
  -2 -10 -10    1.67    1.47
  -2 -10 -11   19.62    4.01
  -2 -10 -12    6.86    2.98
  -2 -10 -13   11.14    3.18
  -2 -11  15   12.82    4.37
  -2 -11  14   22.49    4.90
  -2 -11  13    6.01    3.28
  -2 -11  12   71.35    8.17
  -2 -11  11    0.42    1.40
  -2 -11  10  118.43    9.90
  -2 -11   9   68.28    7.36
   2  11  -8   49.89    6.41
  -2 -11   8   37.62    5.46
   2  11  -7  109.88    9.07
  -2 -11   7  107.04    8.81
   2  11  -6    3.67    2.20
   2  11  -5   32.56    4.86
   2  11  -4    2.82    2.31
   2  11  -3    0.75    1.62
   2  11  -2    4.11    2.07
   2  11  -1    0.98    1.78
   2  11   0    2.57    1.85
   2  11   1    0.42    1.63
   2  11   2   22.49    3.84
   2  11   3    1.55    1.60
   2  11   4   -1.18    2.15
   2  11   4   -0.23    1.84
   2  11   5    1.04    1.82
   2  11   5   -2.36    2.04
   2  11   6    2.24    2.03
   2  11   6    8.47    2.68
   2  11   7    6.28    2.57
   2  11   7    6.64    2.31
  -2 -11  -8    3.62    2.20
   2  11   8    2.81    2.05
   2  11   8    1.80    1.81
  -2 -11  -9    5.18    2.47
   2  11   9    3.41    2.12
   2  11   9    5.61    2.71
  -2 -11 -10    9.89    3.20
  -2 -11 -11    2.63    2.33
  -2 -11 -12   -6.84    2.68
  -2 -12  14   18.69    4.82
  -2 -12  13   43.15    6.63
  -2 -12  12    1.76    1.97
  -2 -12  11   61.02    7.52
  -2 -12  10   25.03    4.84
   2  12  -9   37.59    5.87
  -2 -12   9   38.58    5.86
  -2 -12   8   17.63    3.74
   2  12  -8   23.64    4.60
   2  12  -7    2.25    1.97
   2  12  -6   87.69    8.37
   2  12  -5   64.34    6.96
   2  12  -4   57.82    6.52
   2  12  -3   79.59    7.59
   2  12  -2    0.06    1.55
   2  12  -1   57.77    6.39
   2  12   0    0.09    1.86
   2  12   1    0.54    1.60
   2  12   2   -0.16    1.68
   2  12   3   -0.64    2.21
   2  12   3   -0.15    1.58
   2  12   4    5.26    2.51
   2  12   4    0.10    1.77
   2  12   5    6.81    2.78
   2  12   5   13.09    3.12
   2  12   6   -5.13    2.55
   2  12   6    2.12    2.08
   2  12   7    3.36    1.87
   2  12   7    1.73    1.73
   2  12   8    4.39    2.46
   2  12   9    9.51    3.37
  -2 -12 -11    8.26    2.87
  -2 -13  13    0.89    2.11
  -2 -13  12   33.51    6.09
   2  13 -11    1.30    1.95
  -2 -13  11    1.52    2.10
  -2 -13  10   29.49    5.45
   2  13 -10   31.03    5.77
   2  13  -9   40.49    6.27
   2  13  -8    2.72    1.96
   2  13  -7   77.01    8.25
   2  13  -6   10.95    3.51
   2  13  -5   -0.07    1.87
   2  13  -4   22.44    4.55
   2  13  -3   -0.45    1.76
   2  13  -2   33.57    5.15
   2  13  -1    4.92    2.23
   2  13   0   13.76    3.47
   2  13   1    0.17    1.69
   2  13   2    7.25    2.60
   2  13   3    0.18    2.26
   2  13   3    4.14    2.26
   2  13   4    1.06    2.33
   2  13   4   -0.10    1.75
   2  13   5   -0.13    1.98
   2  13   5   -2.73    2.19
   2  13   6    9.07    3.12
   2  13   7    2.51    2.16
   2  13   8    8.00    3.58
  -2 -14  11   44.83    7.09
   2  14 -11   48.99    7.48
   2  14 -10   29.06    5.58
   2  14  -9   11.62    3.63
   2  14  -8    9.35    3.61
   2  14  -7   12.92    3.77
   2  14  -6   46.77    6.59
   2  14  -5    2.98    2.08
   2  14  -4   11.15    3.30
   2  14  -3   21.43    4.44
   2  14  -2    0.49    1.61
   2  14  -1   12.68    3.53
   2  14   0    2.09    2.38
   2  14   1   15.13    3.29
   2  14   2    2.93    2.32
   2  14   2    4.29    2.02
   2  14   3   -0.05    2.20
   2  14   3    1.82    1.79
   2  14   4   -1.15    2.77
   2  14   5    7.65    3.13
   2  14   6   -1.79    2.00
   2  14   7    6.53    3.19
   2  15 -10    5.70    3.14
   2  15  -9   17.32    4.54
   2  15  -8    1.55    2.01
   2  15  -7   14.01    4.31
   2  15  -6    0.29    2.02
   2  15  -5   -4.80    2.67
   2  15  -4   14.14    3.89
   2  15  -3    2.83    2.20
   2  15  -2    3.27    2.10
   2  15  -1    0.92    1.88
   2  15   0   -2.51    2.31
   2  15   1   -0.66    2.58
   2  15   1    0.46    1.63
   2  15   2    1.13    2.70
   2  15   3   -1.89    2.44
   2  15   4   -1.36    2.61
   2  15   5    2.21    2.36
   2  15   6    1.89    2.29
   2  16  -8    9.41    3.48
   2  16  -7   -5.47    3.09
   2  16  -6    3.58    2.79
   2  16  -5    1.35    1.98
   2  16  -4   -0.35    2.43
   2  16  -3    1.53    2.31
   2  16  -2    7.77    3.23
   3 -17   6    2.08    2.02
   3 -17   7    5.95    2.67
   3 -17   8    3.30    2.49
  -3  16   5   11.28    4.28
  -3  16   4    4.04    3.79
  -3  16   3   19.50    5.21
  -3  16   2    1.59    2.95
  -3  16   1   19.13    5.23
  -3  16   0    2.79    3.14
  -3  16  -1    1.74    2.65
  -3  16  -2   21.58    5.21
  -3  16  -3    4.34    3.54
   3 -16   3    2.19    1.66
  -3  16  -4   -0.42    2.31
   3 -16   4   -0.06    1.87
  -3  16  -5   -3.71    2.75
   3 -16   5    3.16    1.97
  -3  16  -6   -4.42    3.05
   3 -16   6    3.59    2.02
   3 -16   7   -0.41    1.63
  -3  16  -7   -0.04    2.35
  -3  16  -8   -6.67    4.11
   3 -16   8    7.14    3.08
   3 -16   9   -1.27    2.46
  -3  15  10   -3.10    2.25
   3 -15  -8   -1.19    1.97
   3 -15  -7   31.10    5.99
   3 -15  -6   14.29    4.38
   3 -15  -5   26.14    5.59
  -3  15   5   22.36    5.33
  -3  15   4   32.60    6.07
  -3  15   3    3.32    3.29
  -3  15   2   10.90    3.69
  -3  15   1   11.41    3.70
  -3  15   0   13.55    3.98
  -3  15   0   16.28    3.22
  -3  15  -1    7.14    3.75
  -3  15  -1    3.89    1.57
  -3  15  -1   -0.20    1.10
   3 -15   1    5.55    1.89
   3 -15   2    0.01    1.20
  -3  15  -2    1.13    1.23
  -3  15  -2    0.75    1.29
  -3  15  -2   -1.58    2.13
   3 -15   3    6.42    2.26
  -3  15  -3    0.24    2.48
  -3  15  -3    4.89    1.85
  -3  15  -4   -0.13    1.58
  -3  15  -4    0.38    2.50
   3 -15   4   -3.26    1.97
  -3  15  -5    2.73    3.08
   3 -15   5   -0.83    2.01
  -3  15  -6   -3.74    3.11
   3 -15   6    4.66    2.58
  -3  15  -7   -0.04    2.55
   3 -15   7    2.43    2.22
   3 -15   8    0.36    1.92
  -3  15  -8   -5.18    4.06
  -3  15  -9   -4.78    2.92
   3 -15   9    3.32    2.73
  -3  15 -10    3.06    3.37
   3 -15  10    0.04    2.09
  -3  15 -11    0.37    2.55
  -3  15 -12   -0.65    2.48
  -3  15 -13   -4.51    3.11
  -3  14  13   -0.15    1.87
  -3  14  12    2.69    2.39
  -3  14  11    2.16    1.94
   3 -14 -10   12.70    3.96
   3 -14  -9    3.50    2.54
   3 -14  -8   28.31    5.52
   3 -14  -7    6.78    3.40
   3 -14  -6   30.89    5.44
   3 -14  -5   36.38    6.08
  -3  14   5   38.31    6.37
   3 -14  -4    2.88    2.70
  -3  14   4    1.96    2.71
  -3  14   3   47.79    6.79
  -3  14   2   11.22    3.54
  -3  14   1   17.96    2.79
  -3  14   1   16.25    4.17
  -3  14   1   19.51    3.43
  -3  14   0   24.53    5.13
  -3  14   0   28.11    3.63
  -3  14   0   23.91    3.66
   3 -14   0   24.45    3.41
  -3  14  -1    0.03    2.28
  -3  14  -1   -1.17    1.66
  -3  14  -1   -0.39    1.58
   3 -14   1    2.28    1.51
  -3  14  -2   46.68    6.47
  -3  14  -2   46.95    5.11
   3 -14   2   53.01    5.44
   3 -14   3   12.01    2.81
  -3  14  -3    4.35    1.76
  -3  14  -3   16.30    4.93
  -3  14  -4   13.38    3.75
   3 -14   4   13.01    3.15
   3 -14   5    7.17    2.58
  -3  14  -5   -4.02    3.30
   3 -14   6    1.52    2.14
  -3  14  -6   -3.72    2.94
  -3  14  -7   -1.83    2.47
   3 -14   7   -2.48    2.47
  -3  14  -8    0.75    2.18
   3 -14   8    1.99    2.08
   3 -14   9    9.35    3.33
  -3  14  -9    5.62    3.00
   3 -14  10    6.25    3.08
  -3  14 -10    1.95    2.42
   3 -14  11    0.20    2.19
  -3  14 -11   -0.45    2.86
  -3  14 -12    1.08    2.62
  -3  14 -13   -1.28    2.30
  -3  13  14   14.20    3.94
  -3  13  13    4.88    2.72
   3 -13 -12    2.87    2.47
  -3  13  12    0.94    1.64
  -3  13  11   12.01    3.57
   3 -13 -11    4.17    3.00
   3 -13 -10    1.64    2.45
   3 -13  -9   20.22    4.71
   3 -13  -8   -0.37    2.07
   3 -13  -7   30.29    5.51
   3 -13  -6   22.15    4.44
   3 -13  -5   13.22    3.66
  -3  13   5   13.16    3.94
   3 -13  -4   22.57    4.36
  -3  13   4   29.67    5.17
  -3  13   3   -1.19    0.85
  -3  13   3    2.58    2.36
   3 -13  -3   -1.67    2.15
  -3  13   2   47.40    6.53
  -3  13   2   49.20    5.16
  -3  13   2   45.71    3.74
  -3  13   1   15.69    2.48
  -3  13   1   15.50    2.62
  -3  13   1   11.73    3.53
  -3  13   1   17.23    3.18
  -3  13   0   -0.68    1.00
  -3  13   0   -1.60    1.79
  -3  13   0    1.68    2.77
  -3  13   0   -0.65    1.46
   3 -13   0    0.93    1.02
  -3  13  -1   64.45    7.34
  -3  13  -1   67.26    5.91
   3 -13   1   64.91    5.53
  -3  13  -1   66.60    5.72
   3 -13   2    5.08    1.86
  -3  13  -2    9.94    3.46
   3 -13   3   21.87    3.64
  -3  13  -3   21.17    4.02
  -3  13  -4   19.38    4.29
   3 -13   4   22.39    3.87
   3 -13   5   11.31    3.13
  -3  13  -5    1.26    2.57
   3 -13   6   -1.02    1.58
  -3  13  -6   -1.63    2.28
  -3  13  -7   -2.59    2.75
   3 -13   7    3.80    2.49
  -3  13  -8    6.73    2.96
   3 -13   8   11.00    3.38
   3 -13   9    0.59    2.12
  -3  13  -9    0.80    2.20
   3 -13  10    4.85    2.69
  -3  13 -10   -2.16    2.16
   3 -13  11    6.40    2.86
  -3  13 -11    3.89    2.01
   3 -13  12    3.51    2.31
  -3  13 -12    4.28    2.82
  -3  13 -13    9.89    3.62
  -3  13 -14   -2.41    2.10
  -3  12  15    5.89    3.24
   3 -12 -14   -4.64    2.72
  -3  12  14    0.34    2.07
   3 -12 -13    0.36    2.24
  -3  12  13    1.53    2.19
  -3  12  12   -1.49    2.55
   3 -12 -12   -0.32    2.00
   3 -12 -11    2.12    2.57
   3 -12 -10   29.37    5.48
   3 -12  -9   14.94    4.21
   3 -12  -8   34.67    5.73
   3 -12  -7   48.15    6.58
   3 -12  -6    4.77    2.36
   3 -12  -5   26.02    4.86
  -3  12   5   39.93    5.92
   3 -12  -4    0.20    1.87
  -3  12   4    0.09    0.64
  -3  12   4    0.27    1.54
  -3  12   4    0.18    0.46
   3 -12  -3    7.68    2.72
  -3  12   3    7.00    1.34
  -3  12   3    9.93    3.45
  -3  12   3    6.11    2.00
  -3  12   3    8.06    1.47
   3 -12  -2   54.22    6.47
  -3  12   2   48.03    4.98
  -3  12   2   48.70    6.30
  -3  12   2   61.59    4.12
  -3  12   2   48.95    3.87
  -3  12   1   73.75    4.90
  -3  12   1   67.08    5.79
  -3  12   1   69.55    7.30
  -3  12   1   71.14    5.07
  -3  12   0    9.03    2.22
  -3  12   0    3.97    1.87
  -3  12   0    5.79    2.62
   3 -12   1   18.64    3.02
  -3  12  -1   13.91    2.79
  -3  12  -1   16.50    2.92
  -3  12  -1   12.06    3.36
  -3  12  -2  112.77    9.09
   3 -12   2  107.38    7.17
  -3  12  -2  103.60    7.13
   3 -12   3    5.98    2.09
  -3  12  -3    0.73    1.77
   3 -12   4    9.65    2.62
  -3  12  -4    6.38    2.62
   3 -12   5    9.49    2.63
  -3  12  -5   10.05    3.11
   3 -12   6   -0.35    1.66
  -3  12  -6   -1.89    2.36
  -3  12  -7    1.49    2.25
   3 -12   7    2.64    1.97
   3 -12   8   18.48    3.85
  -3  12  -8   13.20    3.42
  -3  12  -9    1.73    2.10
   3 -12   9    0.54    1.58
   3 -12  10    2.57    2.26
  -3  12 -10    1.13    2.00
   3 -12  11   -2.79    2.82
  -3  12 -11   -1.64    1.73
   3 -12  12   34.03    6.11
  -3  12 -12   29.47    4.89
   3 -12  13    4.65    3.00
  -3  12 -13    7.43    3.01
  -3  12 -14   17.76    3.97
  -3  11  16   -2.92    2.63
   3 -11 -15   -7.69    3.53
  -3  11  15    3.42    2.43
   3 -11 -14    1.49    2.32
  -3  11  14    0.39    1.79
  -3  11  13   12.00    3.56
   3 -11 -13    6.86    3.07
   3 -11 -12    5.25    3.10
  -3  11  12    2.17    1.97
   3 -11 -11   35.39    5.82
   3 -11 -10   -1.08    1.76
   3 -11  -9   18.08    4.27
   3 -11  -8   43.44    6.11
   3 -11  -7   13.97    3.62
   3 -11  -6   67.88    7.18
   3 -11  -5   35.96    5.22
  -3  11   5   46.42    5.89
  -3  11   4   66.53    3.28
   3 -11  -4   72.75    7.22
  -3  11   4   69.80    7.23
  -3  11   4   62.40    2.85
   3 -11  -3   -0.18    1.67
  -3  11   3    1.24    0.88
  -3  11   3    1.23    2.35
  -3  11   3    1.17    1.19
  -3  11   3    0.65    0.82
  -3  11   2   14.90    1.96
   3 -11  -2   13.69    3.12
  -3  11   2   13.86    3.33
  -3  11   2   16.01    2.29
  -3  11   2   14.31    2.89
   3 -11  -2   11.30    1.79
  -3  11   1   21.34    2.67
  -3  11   1   30.73    4.77
  -3  11   1   32.13    3.92
   3 -11  -1   25.96    4.29
  -3  11   0    0.07    1.03
  -3  11   0    0.01    1.40
  -3  11   0    0.74    1.48
  -3  11  -1   50.97    5.96
  -3  11  -1   50.88    4.62
  -3  11  -2    2.64    1.53
   3 -11   2    2.44    1.51
  -3  11  -2    3.92    2.18
   3 -11   3    1.59    1.26
  -3  11  -3    3.58    1.51
  -3  11  -3   -0.32    2.43
   3 -11   4    4.20    1.95
  -3  11  -4    2.05    1.63
   3 -11   5   15.15    3.27
  -3  11  -5   16.21    3.58
   3 -11   6    9.31    2.68
  -3  11  -6    2.66    1.71
   3 -11   7    1.99    1.59
  -3  11  -7    2.47    1.76
   3 -11   8   -1.44    1.95
  -3  11  -8   -1.95    2.21
   3 -11   9    1.67    1.88
  -3  11  -9    1.75    1.93
   3 -11  10   -2.64    2.15
  -3  11 -10   -1.47    2.24
   3 -11  11   14.81    4.14
  -3  11 -11    8.23    2.67
   3 -11  12    3.80    2.44
  -3  11 -12    3.70    1.80
  -3  11 -13    7.05    2.69
   3 -11  13   14.39    4.11
   3 -11  14   20.65    4.75
  -3  11 -14   13.04    3.25
  -3  10  16   -3.22    2.27
   3 -10 -16    0.97    2.51
   3 -10 -15    4.24    2.87
  -3  10  15   14.22    4.24
   3 -10 -14   12.38    3.82
  -3  10  14   13.28    3.67
   3 -10 -13    5.63    3.26
  -3  10  13    4.66    2.41
  -3  10  12   19.56    4.21
   3 -10 -12   34.91    5.85
   3 -10 -11    3.26    2.38
   3 -10 -10   92.73    8.75
   3 -10  -9    6.91    2.63
   3 -10  -8   23.85    4.53
   3 -10  -7   90.91    8.14
   3 -10  -6    1.81    2.24
   3 -10  -5   32.13    4.82
  -3  10   5   47.94    5.85
  -3  10   4   28.24    4.54
   3 -10  -4   32.98    4.66
  -3  10   4   35.86    4.19
  -3  10   4   31.81    1.79
  -3  10   4   32.58    2.12
  -3  10   3   41.50    2.89
  -3  10   3   47.30    5.78
  -3  10   3   47.57    4.73
   3 -10  -3   42.76    5.26
   3 -10  -3   40.80    2.77
  -3  10   3   44.15    2.72
  -3  10   2  129.17    5.65
   3 -10  -2  119.21    8.55
  -3  10   2  129.30    7.63
  -3  10   2  132.38    9.08
   3 -10  -2  134.79    5.66
  -3  10   2  134.41    5.41
  -3  10   1    6.74    2.93
   3 -10  -1    7.68    1.69
   3 -10  -1    8.69    2.72
  -3  10   1    9.19    1.87
  -3  10   1    6.49    1.84
  -3  10   0    3.24    1.42
  -3  10   0    4.60    1.77
  -3  10   0    4.92    2.35
  -3  10  -1    7.39    2.25
  -3  10  -1    7.48    2.01
  -3  10  -2    1.02    1.43
   3 -10   2    0.70    1.06
  -3  10  -2   -1.02    1.54
  -3  10  -3    9.59    2.52
   3 -10   3   13.52    2.67
  -3  10  -3    8.62    2.63
  -3  10  -4   -1.00    1.45
   3 -10   4   -1.11    1.52
  -3  10  -4   -0.12    1.79
  -3  10  -5    4.01    1.86
   3 -10   5    6.09    2.40
  -3  10  -6   10.87    2.69
   3 -10   6    9.05    2.55
   3 -10   7    4.78    2.11
  -3  10  -7    1.75    1.93
   3 -10   8   46.34    5.84
  -3  10  -8   26.79    4.15
   3 -10   9    7.50    2.61
   3 -10  10    0.81    1.75
   3 -10  11   13.37    3.24
   3 -10  12    7.64    2.95
   3 -10  13   31.11    5.54
  -3  10 -14    6.27    2.35
   3 -10  14    5.67    3.33
   3 -10  15   27.39    5.63
  -3   9  17   -0.07    2.68
   3  -9 -17    5.16    2.96
   3  -9 -16   22.19    5.04
  -3   9  16   24.97    5.18
  -3   9  15    3.38    2.63
   3  -9 -15    4.96    3.15
   3  -9 -14    3.55    2.43
  -3   9  14    0.79    1.76
  -3   9  13   29.71    4.98
   3  -9 -13   21.01    4.82
   3  -9 -12   23.51    4.71
   3  -9 -11   52.18    6.64
   3  -9 -10   43.43    5.91
   3  -9  -9   31.00    4.85
   3  -9  -8  174.04   10.90
   3  -9  -7   -0.63    1.59
   3  -9  -6  153.91    9.77
   3  -9  -5   25.57    4.06
   3  -9  -4   77.33    6.65
  -3   9   4   77.32    6.88
  -3   9   4   76.64    5.86
  -3   9   4   66.55    2.08
   3  -9  -3   50.72    5.35
  -3   9   3   57.06    3.16
  -3   9   3   57.98    5.90
  -3   9   3   60.80    5.11
   3  -9  -3   58.52    3.08
  -3   9   3   58.88    2.82
   3  -9  -2   41.26    4.84
  -3   9   2   46.89    4.52
  -3   9   2   47.74    5.38
   3  -9  -2   44.33    3.10
  -3   9   2   45.87    3.24
  -3   9   1   60.84    4.07
  -3   9   1   65.65    5.88
   3  -9  -1   55.81    5.53
  -3   9   1   59.40    5.81
  -3   9   1   51.75    4.58
   3  -9  -1   52.63    3.69
   3  -9   0    7.43    2.34
   3  -9   0    9.64    1.91
  -3   9   0   14.20    3.07
  -3   9   0   10.82    2.00
  -3   9   0    8.83    2.74
  -3   9  -1   33.59    4.13
  -3   9  -1   39.74    3.83
  -3   9  -1   39.57    4.72
  -3   9  -2   81.39    6.63
  -3   9  -2   81.19    5.64
  -3   9  -2   82.14    6.43
  -3   9  -3   45.24    4.56
  -3   9  -3   39.67    4.59
  -3   9  -3   36.75    4.47
   3  -9   3   37.21    4.04
  -3   9  -4    0.54    1.07
  -3   9  -4   -0.15    2.00
  -3   9  -4   -1.74    1.88
   3  -9   4    0.75    1.49
  -3   9  -5   -2.43    1.77
   3  -9   5    0.12    1.26
  -3   9  -6    5.50    1.79
   3  -9   6   13.34    3.11
  -3   9  -7   28.24    4.01
   3  -9   7   26.36    4.10
   3  -9   8   -1.86    1.45
   3  -9   9   34.75    5.02
   3  -9  10    3.77    2.36
   3  -9  11   30.63    5.17
   3  -9  12   99.73    9.19
   3  -9  13    0.27    1.71
   3  -9  14   39.13    6.23
  -3   9 -14   48.09    5.22
   3  -9  15    6.64    3.55
   3  -9  16   41.74    7.01
   3  -8 -18   -0.06    2.07
  -3   8  18    2.19    2.60
   3  -8 -17   17.17    4.69
  -3   8  17   28.38    5.59
  -3   8  16    2.05    1.76
   3  -8 -16    3.20    2.57
   3  -8 -15    7.76    2.91
  -3   8  15   18.33    4.24
   3  -8 -14    7.18    3.40
  -3   8  14   12.18    3.59
   3  -8 -13   -0.64    1.93
  -3   8  13   -1.94    2.15
   3  -8 -12   87.88    8.53
   3  -8 -11    1.97    2.07
   3  -8 -10   25.59    4.49
   3  -8  -9   24.80    4.31
   3  -8  -8   46.89    5.49
   3  -8  -7   66.38    5.65
   3  -8  -7   63.42    6.18
   3  -8  -6    6.92    2.12
   3  -8  -5  201.14   10.34
   3  -8  -4  102.18    7.27
  -3   8   4  110.89    7.65
  -3   8   4   89.95    6.08
  -3   8   4   98.97    7.28
  -3   8   3   17.89    1.39
   3  -8  -3   15.05    2.98
  -3   8   3   24.45    3.80
  -3   8   3   16.51    1.60
  -3   8   3   17.76    2.86
   3  -8  -3   19.02    1.64
  -3   8   3   18.23    3.36
  -3   8   2  179.88    9.34
  -3   8   2  163.02    7.86
   3  -8  -2  173.62    5.69
  -3   8   2  171.12    9.20
  -3   8   2  170.97    5.77
   3  -8  -2  171.14    8.98
   3  -8  -1    0.93    1.40
  -3   8   1    2.11    1.24
  -3   8   1    2.08    1.46
  -3   8   1    3.03    1.84
   3  -8  -1    2.02    0.88
  -3   8   1    1.64    0.82
  -3   8   0   83.06    6.16
   3  -8   0   80.82    6.10
  -3   8   0   85.34    6.50
  -3   8   0   78.26    4.70
   3  -8   0   81.33    4.75
  -3   8  -1   11.28    2.59
  -3   8  -1    7.75    1.81
   3  -8   1    7.19    1.68
  -3   8  -1    6.58    1.71
  -3   8  -2    4.36    1.67
  -3   8  -2    1.89    1.42
  -3   8  -3    0.79    1.27
  -3   8  -3   -2.30    2.04
  -3   8  -3   -0.55    1.55
  -3   8  -4    7.06    1.93
  -3   8  -4    4.14    1.52
  -3   8  -4    5.07    2.00
   3  -8   4    5.33    1.84
  -3   8  -5   -0.02    0.99
   3  -8   5    0.01    1.32
  -3   8  -5   -1.49    1.88
  -3   8  -5    0.66    1.21
   3  -8   6    3.40    1.96
  -3   8  -6    1.34    1.36
  -3   8  -6    2.08    1.48
  -3   8  -7   21.82    3.46
  -3   8  -7   13.75    2.50
   3  -8   7   20.02    3.51
   3  -8   8    4.09    2.04
  -3   8  -8    8.27    2.04
   3  -8   9   48.29    5.75
   3  -8  10   91.61    8.20
   3  -8  11   21.97    4.25
   3  -8  12    8.90    3.22
   3  -8  13   51.24    6.74
  -3   8 -14   -1.92    1.70
   3  -8  14    2.70    2.41
   3  -8  15   42.15    6.57
   3  -8  16   36.86    6.26
   3  -7 -19    3.07    2.65
   3  -7 -18   22.06    5.31
  -3   7  18   16.68    4.16
  -3   7  17    6.93    2.38
   3  -7 -17   11.41    3.99
  -3   7  16   32.88    5.74
   3  -7 -16   31.37    5.71
  -3   7  15   38.98    6.00
   3  -7 -15   42.83    6.43
  -3   7  14    7.66    3.12
   3  -7 -14   11.65    3.83
   3  -7 -13   38.57    5.81
  -3   7  13   36.14    5.34
   3  -7 -12    0.92    2.23
   3  -7 -12    0.69    0.49
   3  -7 -11   33.04    5.05
   3  -7 -10   16.82    3.76
   3  -7  -9    1.70    2.08
   3  -7  -8   75.90    6.29
   3  -7  -8   64.61    6.24
   3  -7  -7   33.54    4.21
   3  -7  -7   28.94    3.72
   3  -7  -7   27.80    4.13
  -3   7   6  155.08    9.28
   3  -7  -6  142.22    8.25
   3  -7  -6  164.68    8.31
   3  -7  -6  140.30    8.53
  -3   7   5  166.41    9.20
   3  -7  -5  162.17    8.66
  -3   7   5  159.09    8.09
   3  -7  -5  142.71    8.33
  -3   7   4  141.99    8.21
   3  -7  -4  131.45    7.72
   3  -7  -4  126.76    7.54
  -3   7   4  132.65    7.14
   3  -7  -4  113.54    2.57
   3  -7  -3  138.49    7.79
  -3   7   3  140.17    7.20
   3  -7  -3  139.41    7.81
  -3   7   3  161.56    8.56
  -3   7   3  139.93    3.42
   3  -7  -3  147.60    4.14
   3  -7  -2    1.49    1.39
   3  -7  -2    1.44    0.70
  -3   7   2    0.41    1.00
  -3   7   2    2.49    0.85
  -3   7   2    1.71    1.60
  -3   7   1    8.47    2.00
   3  -7  -1    6.06    1.74
  -3   7   1    8.87    2.48
  -3   7   1    6.20    1.40
   3  -7  -1    9.68    1.54
   3  -7   0    3.22    0.93
  -3   7   0    2.94    1.13
   3  -7   0    4.50    1.60
  -3   7   0    4.60    1.94
  -3   7   0    4.56    1.63
   3  -7   1   13.86    2.54
   3  -7   1   13.52    2.11
  -3   7  -1   17.87    2.67
  -3   7  -1   18.19    3.05
  -3   7  -1   20.20    2.59
  -3   7  -2  173.20    7.60
  -3   7  -2  167.35    8.22
  -3   7  -2  188.92    8.39
  -3   7  -3    0.37    1.31
  -3   7  -3   -0.46    1.11
  -3   7  -3    1.00    1.14
  -3   7  -4   30.64    3.52
  -3   7  -4   27.16    3.31
  -3   7  -4   28.03    3.60
   3  -7   5    6.48    1.91
  -3   7  -5    7.23    1.84
  -3   7  -5    4.68    1.91
  -3   7  -5    4.78    1.74
  -3   7  -6   -0.73    1.00
  -3   7  -6   -0.56    1.48
   3  -7   6    0.02    1.14
  -3   7  -6   -1.14    1.75
  -3   7  -7   49.30    4.73
   3  -7   7   42.06    4.96
  -3   7  -7   43.75    4.23
   3  -7   8   11.07    2.81
   3  -7   9    5.91    2.87
   3  -7  10   41.15    5.50
   3  -7  11    9.85    3.20
   3  -7  12  217.16   13.01
   3  -7  13    5.21    2.78
  -3   7 -14   35.99    3.85
   3  -7  14   40.14    6.08
   3  -7  15   19.30    4.53
   3  -7  16   20.77    4.81
   3  -7  17   31.09    5.98
   3  -6 -19    3.70    3.50
  -3   6  19    9.30    3.87
   3  -6 -18    4.40    3.10
  -3   6  18    1.94    2.31
   3  -6 -17   25.13    5.18
  -3   6  17   20.73    4.65
  -3   6  16   27.94    5.27
   3  -6 -16   24.10    5.17
  -3   6  15    6.01    3.02
   3  -6 -15    4.01    2.47
   3  -6 -14   30.59    5.27
  -3   6  14   29.53    4.84
  -3   6  14   33.44    2.42
  -3   6  13    1.87    1.69
   3  -6 -13    2.61    2.28
   3  -6 -13    1.75    0.81
  -3   6  13    1.47    0.61
   3  -6 -12   48.81    6.26
   3  -6 -12   41.90    2.96
   3  -6 -11   68.15    7.16
   3  -6 -11   68.05    3.27
   3  -6 -10    3.20    2.35
   3  -6 -10    0.61    1.41
   3  -6 -10    1.70    0.54
   3  -6  -9   88.42    6.64
   3  -6  -9   92.20    7.53
   3  -6  -8   22.90    3.86
   3  -6  -8   15.41    2.82
   3  -6  -8   18.99    3.13
   3  -6  -7  188.11    9.25
   3  -6  -7  196.29    9.14
   3  -6  -7  167.99    9.28
   3  -6  -6   69.26    5.55
   3  -6  -6   69.91    5.25
   3  -6  -6   67.41    5.69
   3  -6  -5   16.38    2.94
   3  -6  -5   21.94    3.05
  -3   6   5   16.76    2.66
   3  -6  -4  122.02    7.00
  -3   6   4  104.37    6.15
   3  -6  -4  108.45    6.63
  -3   6   3   18.18    2.80
  -3   6   3   15.59    1.04
   3  -6  -3   15.11    2.46
   3  -6  -3   16.71    1.37
  -3   6   3   17.53    2.57
   3  -6  -3   18.35    2.80
  -3   6   2   -0.52    0.96
   3  -6  -2    1.04    0.69
   3  -6  -2    1.45    1.28
  -3   6   2    0.95    1.15
   3  -6  -2    0.56    1.04
  -3   6   2    1.47    0.60
  -3   6   1  174.22    7.75
   3  -6  -1  176.75    7.73
  -3   6   1  167.35    7.95
   3  -6  -1  162.60    5.56
  -3   6   1  173.76    5.81
   3  -6   0  187.06    7.86
   3  -6   0  180.04    6.47
  -3   6   0  179.15    8.12
  -3   6   0  195.07    6.81
  -3   6   0  207.56    8.25
   3  -6   1   25.80    3.00
   3  -6   1   21.42    2.57
  -3   6  -1   24.44    3.08
  -3   6  -1   24.68    2.70
  -3   6  -1   25.08    2.90
  -3   6  -2    4.31    1.42
   3  -6   2    6.44    1.75
  -3   6  -2    4.83    1.64
  -3   6  -2    5.24    1.76
  -3   6  -3   23.22    2.84
  -3   6  -3   21.53    2.77
  -3   6  -3   26.76    3.25
  -3   6  -4    6.56    1.81
  -3   6  -4    8.37    2.10
  -3   6  -4    5.50    1.63
   3  -6   5    5.54    1.76
  -3   6  -5    5.84    1.39
  -3   6  -5    3.19    1.64
  -3   6  -5    4.21    1.37
  -3   6  -6   36.16    3.52
   3  -6   6   36.65    4.28
  -3   6  -6   38.55    4.50
  -3   6  -6   38.30    3.79
  -3   6  -7   -0.80    1.40
   3  -6   7    0.89    1.60
   3  -6   8   41.23    5.01
  -3   6  -8   37.40    3.57
  -3   6  -9   18.94    2.58
   3  -6   9   27.92    4.30
   3  -6  10  110.10    8.49
   3  -6  11    9.86    3.02
   3  -6  12   47.97    6.19
  -3   6 -12   45.32    3.88
   3  -6  13   21.40    4.51
  -3   6 -13   23.14    2.80
   3  -6  14   31.14    5.28
  -3   6 -14   23.91    2.83
   3  -6  15   25.81    4.84
   3  -6  16   79.75    8.77
   3  -6  17    8.82    3.62
   3  -5 -20    4.04    3.46
  -3   5  19    2.43    2.29
   3  -5 -19   -3.36    3.04
   3  -5 -18   19.35    4.69
  -3   5  18   25.37    5.21
   3  -5 -17   18.57    4.36
  -3   5  17   26.55    5.18
   3  -5 -16   16.90    4.26
  -3   5  16   17.11    4.04
  -3   5  16   14.19    2.25
   3  -5 -15   40.77    6.20
  -3   5  15   41.99    5.94
  -3   5  15   55.46    3.93
   3  -5 -14    8.93    3.23
  -3   5  14    7.07    1.44
  -3   5  14   10.00    2.89
   3  -5 -14   13.21    2.22
  -3   5  13  107.68    8.66
   3  -5 -13   95.38    8.43
  -3   5  13   96.39    4.46
   3  -5 -13   98.21    5.41
   3  -5 -12   42.30    5.68
   3  -5 -12   42.99    3.35
  -3   5  12   41.75    2.69
   3  -5 -11   20.98    4.25
  -3   5  11   21.43    1.72
   3  -5 -11   31.16    4.15
   3  -5 -11   20.78    2.17
   3  -5 -10  162.66    9.92
   3  -5 -10  162.68    8.91
   3  -5 -10  167.53    5.24
   3  -5  -9   49.32    2.45
   3  -5  -9   52.68    5.04
   3  -5  -9   53.50    5.11
   3  -5  -9   49.19    5.46
   3  -5  -8   81.43    6.04
   3  -5  -8   80.22    2.43
   3  -5  -8   88.63    6.34
   3  -5  -8   81.82    6.57
   3  -5  -8   76.41    2.39
   3  -5  -7  220.71   10.22
   3  -5  -7  237.86    9.93
   3  -5  -7  238.70    9.78
   3  -5  -6    2.47    1.36
   3  -5  -6    1.66    1.64
   3  -5  -5  106.70    6.58
   3  -5  -5  124.15    6.87
  -3   5   5  114.68    6.34
   3  -5  -4   93.87    5.89
   3  -5  -4  100.45    6.03
  -3   5   4   96.09    5.65
   3  -5  -4   99.24    2.46
  -3   5   4   99.69    6.23
   3  -5  -3   34.93    3.58
  -3   5   3   41.28    3.93
   3  -5  -3   40.93    3.83
  -3   5   3   33.88    3.40
   3  -5  -3   37.39    1.97
  -3   5   3   36.48    1.57
   3  -5  -2   67.41    4.59
   3  -5  -2   81.31    5.18
  -3   5   2   70.91    4.65
  -3   5   2   73.58    4.84
   3  -5  -2   67.34    3.12
  -3   5   2   67.45    2.79
   3  -5  -1    0.40    0.83
  -3   5   1    0.06    0.85
   3  -5  -1   -0.30    1.18
  -3   5   1    1.44    0.77
   3  -5  -1    1.34    1.24
  -3   5   0  302.58    9.74
   3  -5   0  314.92    9.69
   3  -5   0  302.76    9.09
  -3   5   0  311.95    8.00
   3  -5   0  306.39    8.15
  -3   5   0  318.05    9.31
  -3   5  -1   87.55    4.79
  -3   5  -1   87.83    4.85
   3  -5   1   83.16    4.72
  -3   5  -1   94.53    5.41
   3  -5   1   93.89    4.90
  -3   5  -2   13.94    2.01
  -3   5  -2   10.36    2.04
  -3   5  -2   12.96    2.20
   3  -5   2   15.23    2.38
   3  -5   3  103.81    5.95
  -3   5  -3   89.01    5.06
  -3   5  -3   99.07    5.83
  -3   5  -3   97.15    5.10
  -3   5  -4   38.82    3.30
  -3   5  -4   31.54    3.06
  -3   5  -4   34.70    3.75
  -3   5  -5   25.86    2.82
  -3   5  -5   23.59    2.63
  -3   5  -5   25.16    3.42
  -3   5  -6    7.78    1.61
  -3   5  -6    6.93    2.17
  -3   5  -7   49.44    3.67
  -3   5  -7   49.49    5.08
   3  -5   7   44.89    4.76
   3  -5   8    8.01    2.35
  -3   5  -8   15.07    2.10
   3  -5   9    3.90    2.26
  -3   5  -9    3.58    1.24
  -3   5 -10  142.01    6.13
   3  -5  10  140.16    9.44
   3  -5  11    5.94    2.64
  -3   5 -11    2.74    0.97
  -3   5 -12   55.76    3.77
   3  -5  12   52.54    6.29
   3  -5  13   20.02    4.27
  -3   5 -13   10.46    1.68
   3  -5  14   65.16    7.46
   3  -5  15   55.11    7.15
   3  -5  16   -1.76    2.42
   3  -5  17   31.65    5.94
   3  -5  18   19.72    5.15
   3  -4 -20    1.17    2.90
  -3   4  19    6.41    2.90
   3  -4 -19   20.65    5.17
  -3   4  18   19.07    4.63
   3  -4 -18   19.69    5.46
   3  -4 -17   -0.39    2.95
  -3   4  17    0.81    1.15
  -3   4  17    1.80    1.93
   3  -4 -16  110.23   10.08
  -3   4  16  124.13   10.23
  -3   4  16  125.06    6.78
   3  -4 -15    5.83    3.26
  -3   4  15    2.03    1.01
  -3   4  15    2.34    2.22
   3  -4 -15    3.40    1.47
  -3   4  14   49.70    6.18
   3  -4 -14   42.52    3.75
  -3   4  14   46.12    3.73
   3  -4 -14   39.83    6.00
   3  -4 -13   21.23    4.53
  -3   4  13   19.05    3.74
  -3   4  13   18.62    2.35
   3  -4 -13   19.53    2.44
   3  -4 -12   68.17    7.09
   3  -4 -12   67.74    4.04
  -3   4  12   70.60    6.69
  -3   4  12   68.43    3.96
   3  -4 -11  191.30    6.20
  -3   4  11  200.84    6.22
   3  -4 -11  170.59   10.45
  -3   4  10   19.19    1.80
   3  -4 -10   17.71    3.61
   3  -4 -10   15.42    1.69
   3  -4  -9  408.10    7.40
   3  -4  -9  390.94   14.41
   3  -4  -8   97.86    7.02
   3  -4  -8   96.73    3.18
   3  -4  -7  171.69    3.99
   3  -4  -7  164.45    8.56
   3  -4  -7  166.32    3.62
   3  -4  -6   78.14    5.68
   3  -4  -6   78.33    2.22
   3  -4  -6   74.79    2.19
   3  -4  -5   -0.23    1.42
  -3   4   5    0.54    1.05
   3  -4  -5    0.14    0.24
   3  -4  -4   34.80    3.50
   3  -4  -4   39.68    3.69
  -3   4   4   38.64    3.48
   3  -4  -4   37.29    1.45
  -3   4   4   40.89    3.94
   3  -4  -3   20.24    2.62
   3  -4  -3   19.36    2.64
  -3   4   3   17.04    2.30
   3  -4  -3   18.13    1.51
  -3   4   3   22.10    2.75
  -3   4   3   16.76    1.21
   3  -4  -2   21.61    1.86
   3  -4  -2   23.51    2.69
  -3   4   2   24.89    1.74
   3  -4  -2   20.40    2.45
  -3   4   2   25.53    2.77
   3  -4  -1   79.34    4.66
  -3   4   1   80.73    3.52
  -3   4   1   83.43    4.57
   3  -4  -1   79.03    4.34
   3  -4  -1   76.99    3.77
   3  -4   0    4.00    1.16
  -3   4   0    5.00    1.16
   3  -4   0    2.77    1.10
  -3   4   0    4.00    1.13
   3  -4   0    1.79    1.02
   3  -4   1  256.31    8.00
   3  -4   1  257.03    7.36
  -3   4  -1  253.22    7.98
   3  -4   1  269.82    8.02
  -3   4  -1  274.83    7.97
  -3   4  -1  258.55    7.30
  -3   4  -2   16.69    1.95
  -3   4  -2   18.57    2.35
  -3   4  -2   18.83    2.53
   3  -4   2   17.54    2.48
  -3   4  -3   45.24    3.13
  -3   4  -3   52.02    3.58
  -3   4  -3   45.66    3.92
  -3   4  -4    6.59    1.36
  -3   4  -4    7.33    1.45
  -3   4  -4    7.97    2.07
  -3   4  -5    9.16    2.20
  -3   4  -5    8.18    1.48
  -3   4  -6  291.05    7.79
  -3   4  -6  288.32   11.32
  -3   4  -7   89.19    4.30
  -3   4  -7   95.92    6.92
  -3   4  -8   27.04    2.38
   3  -4   8   31.71    4.41
  -3   4  -9   58.68    3.45
   3  -4   9   69.93    6.45
  -3   4 -10    1.06    0.81
   3  -4  10    0.89    1.52
  -3   4 -11   62.26    3.38
   3  -4  11   72.92    6.98
   3  -4  12   21.93    4.15
  -3   4 -12   22.68    2.03
   3  -4  13    3.36    2.22
  -3   4 -13    3.45    0.86
   3  -4  14   34.24    5.49
   3  -4  15    1.82    1.67
   3  -4  16   41.18    6.22
   3  -4  17   13.76    4.12
   3  -4  18   17.40    4.85
   3  -3 -20   19.53    5.18
  -3   3  20   19.14    4.96
   3  -3 -19    5.88    3.46
  -3   3  19   10.09    3.38
   3  -3 -18   49.91    7.57
  -3   3  18   52.76    7.28
  -3   3  18   50.63    5.04
   3  -3 -17   16.49    4.41
  -3   3  17    7.30    2.10
  -3   3  17    9.58    3.29
   3  -3 -16   10.70    4.40
  -3   3  16    5.86    1.87
  -3   3  16    8.48    3.22
   3  -3 -16    5.73    1.85
   3  -3 -15  110.96    9.87
   3  -3 -15  101.76    6.44
  -3   3  15   97.68    8.70
  -3   3  15   99.56    6.17
   3  -3 -14   15.75    2.56
  -3   3  14   11.58    2.94
  -3   3  14   14.50    2.32
   3  -3 -13   38.84    3.64
  -3   3  13   36.06    5.15
  -3   3  13   33.43    3.25
  -3   3  12  154.55    9.64
  -3   3  12  156.37    6.49
   3  -3 -12  150.75    6.54
  -3   3  11   26.43    2.58
   3  -3 -11   23.96    2.54
   3  -3 -10   86.85    6.45
   3  -3 -10   85.59    4.27
  -3   3  10   73.82    3.96
   3  -3  -9   -0.04    0.67
  -3   3   9    0.22    0.65
   3  -3  -8    7.37    2.68
   3  -3  -8    4.77    0.95
   3  -3  -7  136.51    7.70
   3  -3  -7  151.49    4.43
   3  -3  -6    1.20    2.03
   3  -3  -6   -0.13    0.49
   3  -3  -6   -0.17    0.46
  -3   3   5   96.14    5.45
   3  -3  -5   96.22    5.84
   3  -3  -5   96.19    3.20
   3  -3  -5   98.01    3.16
  -3   3   4    5.32    1.53
   3  -3  -4    6.76    0.95
   3  -3  -4    5.03    1.76
   3  -3  -3   65.49    4.20
  -3   3   3   67.13    4.27
   3  -3  -3   63.66    2.69
  -3   3   3   64.85    2.73
   3  -3  -2  185.05    6.40
  -3   3   2  194.72    6.70
   3  -3  -2  185.56    4.99
  -3   3   2  192.64    5.03
  -3   3   1    3.28    1.20
   3  -3  -1    1.43    0.88
   3  -3  -1    2.54    1.35
   3  -3  -1    2.84    1.06
  -3   3   1    2.46    0.88
   3  -3   0  494.37    9.02
  -3   3   0  491.69    9.15
   3  -3   0  494.85   10.39
  -3   3   0  496.06    9.77
   3  -3   0  480.29   10.20
   3  -3   1   14.49    2.07
  -3   3  -1   12.48    1.49
   3  -3   1   14.19    1.56
   3  -3   1   13.73    1.83
  -3   3  -1   13.55    1.97
  -3   3  -2    0.83    0.62
   3  -3   2    0.58    0.70
  -3   3  -2    2.52    1.40
  -3   3  -3   84.18    3.59
  -3   3  -3   87.31    5.22
  -3   3  -4  100.86    4.12
  -3   3  -4  104.07    6.08
  -3   3  -5  262.35    6.52
  -3   3  -5  271.73   10.26
  -3   3  -6  132.12    4.47
  -3   3  -6  136.33    7.78
  -3   3  -7   58.63    2.89
  -3   3  -7   58.66    5.36
  -3   3  -8  165.74    4.61
  -3   3  -8  175.56    9.61
   3  -3   8  165.42    9.22
  -3   3  -9   36.13    2.11
   3  -3   9   31.82    4.43
  -3   3 -10  109.10    3.41
   3  -3  10  105.91    8.03
  -3   3 -11   16.29    1.20
   3  -3  11   16.41    3.57
   3  -3  12   61.64    6.66
   3  -3  13   42.76    5.76
   3  -3  14   26.42    4.70
   3  -3  15   53.62    6.77
   3  -3  16    6.23    3.12
   3  -3  17    1.58    2.52
   3  -3  18   30.52    5.96
   3  -2 -21   22.88    6.19
   3  -2 -20    8.03    3.84
  -3   2  19    1.65    1.59
  -3   2  19    2.59    2.41
  -3   2  18   54.79    7.18
  -3   2  18   63.60    5.91
  -3   2  17    4.70    2.53
  -3   2  17    5.41    1.92
   3  -2 -16   98.99    7.00
  -3   2  16  109.72    7.15
  -3   2  16  105.49    9.21
  -3   2  15    3.89    1.68
  -3   2  15    3.35    2.25
   3  -2 -15    2.82    1.56
  -3   2  14   63.55    6.62
  -3   2  14   69.34    5.19
   3  -2 -14   60.94    5.06
  -3   2  13  102.37    8.02
  -3   2  13   96.38    5.82
   3  -2 -13   94.40    5.86
  -3   2  12    4.48    1.50
  -3   2  12    3.61    2.06
   3  -2 -12    5.34    1.53
   3  -2 -11  275.23    8.91
  -3   2  11  303.21   12.61
  -3   2  11  282.85    8.95
   3  -2 -10    8.27    1.65
  -3   2  10    7.87    1.56
   3  -2  -9  249.37    7.42
  -3   2   9  244.54    7.38
   3  -2  -8  230.99    6.71
  -3   2   8  213.08    6.48
   3  -2  -7    4.14    0.98
   3  -2  -6    6.22    1.06
   3  -2  -6    6.30    1.16
  -3   2   5   32.30    3.09
   3  -2  -5   31.59    2.17
   3  -2  -5   31.60    2.20
   3  -2  -4    8.50    1.17
  -3   2   4    8.62    1.69
  -3   2   3   -0.57    1.12
   3  -2  -3    0.58    0.73
  -3   2   3    0.21    0.56
   3  -2  -3    0.99    1.52
   3  -2  -2  159.77    5.48
   3  -2  -2  157.28    5.00
  -3   2   2  155.07    4.93
   3  -2  -1   10.71    1.50
   3  -2  -1    9.08    1.47
  -3   2   1   12.30    1.68
   3  -2   0   22.04    1.68
  -3   2   0   25.94    1.95
   3  -2   0   23.95    2.43
  -3   2   0   24.04    2.33
   3  -2   1    3.13    0.66
  -3   2  -1    4.00    1.17
  -3   2  -1    2.82    0.75
  -3   2  -2   16.76    1.27
   3  -2   2   18.77    1.76
  -3   2  -2   18.18    2.28
  -3   2  -3  185.50    4.26
   3  -2   3  188.82    4.95
  -3   2  -3  196.88    7.80
  -3   2  -4   71.27    5.03
  -3   2  -5   17.68    2.90
  -3   2  -6   27.60    3.50
  -3   2  -7   90.20    6.55
   3  -2   7   92.09    6.57
   3  -2   8   14.83    3.28
  -3   2  -8   14.44    3.09
   3  -2   9  104.49    7.69
   3  -2  10   24.64    4.06
   3  -2  11   53.82    5.90
   3  -2  12   47.90    5.90
   3  -2  13    3.28    2.55
   3  -2  14   97.91    8.79
   3  -2  15    7.12    3.24
   3  -2  16   48.15    6.63
   3  -2  17    5.59    2.71
   3  -2  18   -8.42    3.48
   3  -2  19   14.99    4.32
  -3   1  20    3.52    2.03
  -3   1  19   16.59    3.44
  -3   1  19   13.40    3.91
  -3   1  18    4.79    2.63
  -3   1  18    0.06    1.55
  -3   1  17   26.02    3.98
  -3   1  17   20.76    4.36
  -3   1  16   30.15    5.00
  -3   1  16   36.79    4.46
  -3   1  15   77.04    7.53
  -3   1  15   81.29    6.19
   3  -1 -15   73.84    6.03
  -3   1  14   72.63    7.06
   3  -1 -14   72.36    5.71
  -3   1  14   73.93    5.66
  -3   1  13    4.49    1.95
   3  -1 -13    7.74    1.98
  -3   1  12  102.19    7.49
   3  -1 -12  101.82    6.16
  -3   1  12   98.51    5.94
  -3   1  11    6.82    1.77
  -3   1  11    8.72    2.36
   3  -1 -11    6.34    1.65
   3  -1 -10  116.97    5.86
  -3   1  10  117.07    5.89
   3  -1  -9  220.68    7.63
  -3   1   9  223.43    7.68
   3  -1  -8   22.54    2.40
   3  -1  -8   32.03    3.43
  -3   1   8   24.29    2.57
   3  -1  -7   10.80    1.68
   3  -1  -7   10.68    2.07
  -3   1   7    8.79    1.52
   3  -1  -6   -0.12    0.65
   3  -1  -6    0.20    0.67
   3  -1  -6    0.27    0.60
   3  -1  -5  146.96    5.30
   3  -1  -5  159.13    6.33
   3  -1  -5  165.76    5.48
  -3   1   4   43.26    3.21
   3  -1  -4   43.96    3.19
   3  -1  -4   42.96    2.87
  -3   1   3   43.74    3.11
  -3   1   3   46.24    2.88
   3  -1  -3   43.28    2.84
  -3   1   2    0.00    0.76
   3  -1  -2   -0.74    0.80
  -3   1   1    0.00    0.76
   3  -1  -1    2.58    1.19
   3  -1   0  158.85    3.57
  -3   1   0  156.54    5.89
  -3   1  -1  163.95    6.41
  -3   1  -2   55.92    3.99
   3  -1   3  164.71    4.03
  -3   1  -3  161.61    7.09
  -3   1  -4    5.78    1.81
  -3   1  -5  437.73   12.94
   3  -1   6  131.60    7.54
  -3   1  -6  128.99    7.42
  -3   1  -7    2.77    1.49
   3  -1   7    2.75    1.62
  -3   1  -8  147.13    8.64
   3  -1   8  141.82    8.37
   3  -1   9    5.61    2.26
   3  -1  10  109.25    8.02
   3  -1  11  139.14    9.31
   3  -1  12   42.57    5.47
   3  -1  13   82.37    7.72
   3  -1  14   -1.05    1.94
   3  -1  15   30.01    5.11
   3  -1  16   22.00    4.70
   3  -1  17    4.52    2.68
   3  -1  18    2.08    2.07
   3  -1  19    3.27    3.19
  -3   0  21   19.03    4.06
  -3   0  20   12.09    3.24
  -3   0  19    6.00    2.53
  -3   0  18   36.93    5.96
  -3   0  18   52.53    5.89
  -3   0  17    0.77    1.60
  -3   0  17   -5.01    2.07
  -3   0  16   82.74    8.09
  -3   0  16   87.88    6.97
  -3   0  15  136.47    9.79
  -3   0  15  139.96    8.41
  -3   0  14   21.31    3.26
  -3   0  14   17.20    3.47
   3   0 -14   15.31    2.95
   3   0 -13  102.82    6.83
  -3   0  13   99.35    7.75
  -3   0  13  108.69    6.88
  -3   0  12    0.96    1.01
   3   0 -12    3.97    1.54
  -3   0  12    3.40    1.62
   3   0 -11  206.70    8.67
  -3   0  11  202.99    9.96
  -3   0  11  203.49    8.63
   3   0 -10   43.87    3.94
  -3   0  10   46.07    4.55
  -3   0  10   43.13    3.85
   3   0  -9   66.21    4.49
  -3   0   9   65.29    4.52
  -3   0   8  168.01    6.85
   3   0  -8  170.13    6.87
   3   0  -7   57.91    4.16
  -3   0   7   56.77    3.86
   3   0  -7   57.38    3.84
   3   0  -6  149.56    6.24
   3   0  -6  153.43    5.95
   3   0  -5    1.94    0.89
   3   0  -5    1.56    0.88
   3   0  -5    1.31    0.84
   3   0  -4    2.36    0.95
   3   0  -4    4.61    1.15
  -3   0   4    3.58    1.23
   3   0  -4    3.73    1.04
  -3   0   3  548.10   10.06
  -3   0   3  544.02   10.76
   3   0  -3  556.65   11.04
  -3   0   2    0.68    0.88
  -3   0   1  229.62    7.25
  -3   0   0   11.43    1.87
  -3   0  -1    1.42    1.11
  -3   0  -2    5.68    1.56
  -3   0  -3   32.01    3.28
  -3   0  -4  238.81    3.87
  -3   0  -4  261.81    9.58
  -3   0  -5   55.84    4.72
   3   0   5   55.31    4.72
  -3   0  -5   59.22    2.53
  -3   0  -6    2.16    0.95
  -3   0  -6    0.22    1.08
   3   0   7  175.64    9.06
  -3   0  -7  201.75    9.73
  -3   0  -8    0.95    1.12
  -3   0  -8    0.45    1.42
   3   0   8   -0.58    1.54
   3   0   9   58.48    5.75
   3   0  10   50.20    5.44
   3   0  11   25.71    4.21
  -3   0 -11   36.67    3.99
  -3   0 -12   94.11    6.36
   3   0  12   85.08    7.56
  -3   0 -13    4.09    2.19
   3   0  13    5.55    2.69
  -3   0 -14  121.64    7.96
   3   0  14  112.96    9.21
   3   0  15   25.83    4.74
  -3   0 -15   22.92    3.91
   3   0  16   19.00    4.33
  -3   0 -16   22.65    4.16
   3   0  17    5.90    2.84
   3   0  18   -1.83    2.91
   3   0  19    0.76    2.45
  -3  -1  22    8.41    3.24
  -3  -1  21   26.23    4.98
  -3  -1  20   -2.91    2.15
  -3  -1  19   49.86    6.11
  -3  -1  18   11.98    3.37
  -3  -1  17   63.06    7.25
  -3  -1  17   66.31    6.60
  -3  -1  16   48.04    6.07
  -3  -1  16   43.93    5.25
  -3  -1  15    4.95    2.16
  -3  -1  15    2.68    1.75
  -3  -1  14   97.31    7.87
  -3  -1  14  101.75    7.23
  -3  -1  13   -0.54    1.31
  -3  -1  13    0.88    1.30
   3   1 -13   -1.11    1.28
   3   1 -12  137.99    7.80
  -3  -1  12  128.15    8.15
  -3  -1  12  120.86    7.25
  -3  -1  11   31.35    3.66
   3   1 -11   25.36    3.27
  -3  -1  11   28.46    3.75
  -3  -1  10   65.63    5.32
  -3  -1  10   74.67    5.30
   3   1 -10   62.79    4.87
  -3  -1   9  301.30   10.66
  -3  -1   9  322.50   10.48
   3   1  -9  325.71   10.53
  -3  -1   8   51.90    4.10
   3   1  -8   56.25    4.28
   3   1  -7   64.95    4.25
  -3  -1   7   63.99    4.39
   3   1  -7   61.06    4.30
   3   1  -6  165.81    6.25
  -3  -1   6  168.03    6.79
   3   1  -6  160.18    6.62
   3   1  -5  313.66    9.22
   3   1  -5  317.10    8.04
   3   1  -5  300.02    8.84
   3   1  -4    2.17    0.85
   3   1  -4    1.99    0.97
  -3  -1   3   34.77    2.99
  -3  -1   3   37.66    2.50
  -3  -1   2  315.77    8.85
  -3  -1   1   -0.26    0.86
  -3  -1   0   12.04    1.98
   3   1   1   26.35    1.29
  -3  -1  -1   31.45    3.15
  -3  -1  -2   22.61    2.74
  -3  -1  -3    0.80    0.90
   3   1   4  126.28    6.97
  -3  -1  -4  125.95    6.87
  -3  -1  -4  127.08    3.22
   3   1   5  209.61    9.30
  -3  -1  -5  220.41    9.44
  -3  -1  -5  214.76    4.97
  -3  -1  -6   17.54    1.72
  -3  -1  -6   21.33    3.17
   3   1   6   16.51    3.04
  -3  -1  -7    3.12    1.09
   3   1   7    1.38    1.83
  -3  -1  -7    3.85    1.49
  -3  -1  -7    4.08    1.77
   3   1   8  139.62    8.35
  -3  -1  -8  160.70    8.73
  -3  -1  -8  163.90    9.18
  -3  -1  -8  144.17    5.84
   3   1   9   40.74    4.90
  -3  -1  -9   38.12    3.36
   3   1  10  104.09    7.71
  -3  -1 -10   97.77    5.72
  -3  -1 -11  196.42    8.49
   3   1  11  217.20   11.55
  -3  -1 -12    0.03    1.33
   3   1  12   -0.30    2.22
   3   1  13   47.93    5.89
  -3  -1 -13   62.59    5.46
  -3  -1 -14   11.62    2.60
   3   1  14   11.46    3.51
  -3  -1 -15   11.83    2.70
   3   1  15   15.04    3.57
  -3  -1 -16   15.09    3.37
   3   1  16   18.48    4.03
   3   1  17    4.05    2.49
   3   1  18   11.96    3.66
   3   1  19    3.71    2.73
  -3  -2  22   15.17    4.29
  -3  -2  21   15.28    3.76
  -3  -2  20   22.42    4.50
  -3  -2  19    1.52    1.84
  -3  -2  18   66.95    7.01
  -3  -2  17   26.93    4.26
  -3  -2  16   22.83    4.34
  -3  -2  16   22.94    4.20
  -3  -2  15  144.24    9.24
  -3  -2  15  143.55    9.78
  -3  -2  14   -0.58    1.87
  -3  -2  14   -1.20    1.84
  -3  -2  13    5.12    1.91
  -3  -2  13    4.17    2.08
   3   2 -12   28.04    3.68
  -3  -2  12   28.21    3.88
  -3  -2  12   24.01    3.55
   3   2 -11   96.75    6.57
  -3  -2  11   81.64    6.04
  -3  -2  11   88.34    6.30
  -3  -2  10  139.54    7.49
  -3  -2  10  154.30    8.06
   3   2 -10  156.37    8.00
  -3  -2   9   50.09    4.29
  -3  -2   9   45.18    4.28
   3   2  -9   52.80    4.59
  -3  -2   8   93.15    5.40
  -3  -2   8  101.14    6.05
   3   2  -8   90.08    5.70
   3   2  -7   19.81    2.62
  -3  -2   7   18.68    2.62
   3   2  -6  141.97    5.56
  -3  -2   6  128.15    6.38
   3   2  -6  133.47    6.48
   3   2  -5    2.14    1.15
   3   2  -5    4.80    1.11
   3   2  -4   25.80    2.03
   3   2  -4   22.71    2.62
  -3  -2   3  165.24    6.89
  -3  -2   3  166.07    4.69
  -3  -2   2  147.14    6.49
  -3  -2   1   29.58    2.98
  -3  -2   0   12.64    2.11
   3   2   1   27.79    1.81
  -3  -2  -1   26.22    2.93
  -3  -2  -2    7.30    1.76
   3   2   2    6.97    0.94
  -3  -2  -3    5.34    1.73
   3   2   3    5.46    0.91
   3   2   3    4.57    1.88
   3   2   4   75.85    5.52
  -3  -2  -4   72.91    3.04
  -3  -2  -4   71.12    5.32
   3   2   5  134.07    7.59
  -3  -2  -5  126.67    7.29
  -3  -2  -5  135.10    4.47
  -3  -2  -6   29.87    2.37
  -3  -2  -6   30.44    3.91
   3   2   6   29.60    1.45
   3   2   6   32.19    4.09
  -3  -2  -7   80.39    4.22
  -3  -2  -7   83.40    6.02
   3   2   7   80.22    6.16
  -3  -2  -7   68.97    5.86
   3   2   8    6.24    2.23
  -3  -2  -8    9.26    2.32
  -3  -2  -8    5.33    1.38
  -3  -2  -8    5.59    2.12
   3   2   9   30.40    4.30
  -3  -2  -9   32.58    3.16
  -3  -2 -10    6.41    1.86
   3   2  10    6.87    2.32
  -3  -2 -11    1.08    1.41
   3   2  11   -1.77    1.99
  -3  -2 -12   32.06    3.78
   3   2  12   34.70    4.87
  -3  -2 -13    4.08    1.90
   3   2  13    6.68    2.90
   3   2  14   18.50    3.85
  -3  -2 -14   20.28    3.42
  -3  -2 -15   47.10    5.17
   3   2  15   50.37    6.41
   3   2  16    3.26    2.53
   3   2  17   19.19    4.41
   3   2  18    2.62    2.33
   3   2  19   -8.67    3.51
  -3  -3  22   -1.27    2.08
  -3  -3  21   43.12    6.39
  -3  -3  20    2.83    2.41
  -3  -3  19   34.65    5.57
  -3  -3  18   16.67    3.64
  -3  -3  17   32.24    4.93
  -3  -3  16  132.94    9.47
  -3  -3  15   25.99    4.20
  -3  -3  14   51.32    5.73
  -3  -3  14   67.44    6.48
  -3  -3  13    3.94    1.98
  -3  -3  13    1.66    1.38
  -3  -3  12   20.97    3.52
  -3  -3  12   22.69    3.55
   3   3 -11  112.26    7.35
  -3  -3  11   93.47    6.44
  -3  -3  11   99.40    6.95
  -3  -3  10   11.05    2.56
  -3  -3  10    4.75    1.67
   3   3 -10    9.88    2.34
  -3  -3   9   81.39    5.27
  -3  -3   9   78.32    5.83
   3   3  -9   86.05    6.09
  -3  -3   8   48.67    3.76
  -3  -3   8   47.66    4.41
   3   3  -8   49.70    4.52
  -3  -3   7   26.27    2.61
   3   3  -7   22.93    3.02
  -3  -3   7   23.50    3.09
   3   3  -6   -0.33    1.16
  -3  -3   6    1.97    1.29
   3   3  -6   -0.19    0.66
  -3  -3   6    0.99    0.84
   3   3  -5   99.98    3.99
   3   3  -5  106.25    5.98
   3   3  -4   32.56    3.30
   3   3  -3   27.99    3.07
  -3  -3   2  208.19    8.24
  -3  -3   2  202.74    4.39
  -3  -3   1  170.16    7.48
   3   3   0  100.49    4.25
  -3  -3   0  105.53    5.97
   3   3   1  165.44    5.25
   3   3   1  165.14    7.66
  -3  -3  -1  169.01    7.69
   3   3   2   19.80    1.91
  -3  -3  -2   16.49    2.59
   3   3   2   18.44    2.79
  -3  -3  -3  120.80    5.42
   3   3   3  123.92    6.92
   3   3   3  124.48    4.64
  -3  -3  -3  120.85    6.89
   3   3   4  147.72    5.34
  -3  -3  -4  151.46    6.63
   3   3   4  136.53    7.44
  -3  -3  -4  148.09    7.85
  -3  -3  -4  144.43    5.10
  -3  -3  -5   71.28    3.77
   3   3   5   68.66    5.61
  -3  -3  -5   71.33    5.67
  -3  -3  -6  308.94    8.19
   3   3   6  313.93    6.53
   3   3   6  298.73   11.94
  -3  -3  -6  325.23   12.31
  -3  -3  -7   22.87    2.44
  -3  -3  -7   24.18    3.35
   3   3   7   24.67    3.88
  -3  -3  -7   22.72    3.56
  -3  -3  -8   82.95    4.80
  -3  -3  -8   84.20    6.36
   3   3   8   83.91    6.68
   3   3   9  129.99    8.47
  -3  -3  -9  118.81    6.13
  -3  -3 -10    0.06    1.17
   3   3  10    1.16    1.89
  -3  -3 -11   24.81    3.26
   3   3  11   27.96    4.31
  -3  -3 -12    6.03    1.94
   3   3  12    5.79    2.30
   3   3  13   12.56    3.13
  -3  -3 -13   11.67    2.60
   3   3  14   20.04    4.20
  -3  -3 -14   18.66    3.19
  -3  -3 -15    1.65    1.67
   3   3  15    0.83    1.71
   3   3  16   29.65    5.07
   3   3  17    0.78    1.87
   3   3  18    4.09    2.87
  -3  -4  22   14.19    3.93
  -3  -4  21   -1.15    1.99
  -3  -4  20   21.17    4.79
  -3  -4  19    7.96    3.17
  -3  -4  18   32.16    5.21
  -3  -4  17   73.98    7.64
  -3  -4  16    0.49    1.45
  -3  -4  15   43.83    5.63
  -3  -4  14   18.17    3.49
  -3  -4  13   35.74    4.81
  -3  -4  12   71.62    6.40
  -3  -4  11    3.48    1.55
  -3  -4  11    5.11    2.00
   3   4 -10  226.44   10.53
  -3  -4  10  214.26    8.92
  -3  -4  10  201.84   10.02
  -3  -4   9   23.32    2.89
   3   4  -9   27.02    3.57
  -3  -4   9   27.02    3.64
   3   4  -8    6.35    1.87
  -3  -4   8    5.28    1.40
  -3  -4   8    7.12    1.98
   3   4  -7    4.26    1.62
  -3  -4   7    2.27    0.97
  -3  -4   7    3.01    1.64
  -3  -4   6   14.70    1.75
   3   4  -6   18.69    1.85
   3   4  -6   14.07    2.49
  -3  -4   5   22.65    1.83
   3   4  -5   20.61    1.72
   3   4  -5   18.78    2.73
   3   4  -4    0.28    1.03
  -3  -4   4    0.27    0.37
   3   4  -3  178.00    7.83
  -3  -4   2   56.51    4.60
  -3  -4   2   52.56    1.75
   3   4  -2   56.34    4.46
  -3  -4   1   83.87    5.54
   3   4  -1   73.55    5.23
   3   4   0    9.21    2.18
  -3  -4   0    8.42    1.92
   3   4   0    8.00    1.39
   3   4   1    1.24    0.76
  -3  -4  -1   -0.15    0.91
  -3  -4  -1    0.36    0.47
   3   4   2   39.66    3.01
  -3  -4  -2   42.91    2.87
   3   4   2   43.88    4.38
  -3  -4  -2   41.37    4.14
  -3  -4  -3  188.77    6.76
   3   4   3  198.22    9.12
  -3  -4  -3  194.45    9.04
   3   4   3  198.52    6.79
   3   4   4   83.18    4.58
  -3  -4  -4   89.40    4.59
   3   4   4   83.34    6.11
  -3  -4  -4   82.17    6.02
  -3  -4  -4   90.99    5.08
  -3  -4  -5  367.19    9.48
   3   4   5  357.26    9.83
   3   4   5  355.26   12.77
  -3  -4  -5  389.58   13.36
  -3  -4  -6   -0.99    1.32
  -3  -4  -6   -0.22    0.81
   3   4   6   -0.44    0.93
   3   4   6    0.98    1.77
  -3  -4  -7   15.81    2.30
  -3  -4  -7   21.94    3.16
   3   4   7   18.26    1.94
  -3  -4  -7   18.10    3.17
   3   4   7   17.85    3.42
  -3  -4  -8   69.10    4.70
  -3  -4  -8   69.10    5.78
   3   4   8   68.12    5.98
   3   4   8   76.69    6.74
  -3  -4  -9    0.99    1.00
   3   4   9    6.65    2.96
  -3  -4 -10   46.13    4.24
   3   4  10   35.40    4.70
  -3  -4 -11    0.77    1.13
   3   4  11    4.79    2.19
  -3  -4 -12   29.62    3.79
   3   4  12   22.43    4.07
  -3  -4 -13   33.49    4.20
   3   4  13   25.11    4.47
   3   4  14    6.52    2.71
  -3  -4 -14    3.36    1.62
   3   4  15   10.16    3.29
   3   4  16   11.41    3.49
   3   4  17    2.46    2.29
  -3  -5  21   15.83    4.21
  -3  -5  20   -0.66    2.28
  -3  -5  19   20.62    4.67
  -3  -5  18   16.77    3.70
  -3  -5  17    3.09    2.36
  -3  -5  16   77.24    7.81
  -3  -5  15   46.86    5.97
  -3  -5  14   42.27    5.56
  -3  -5  13  101.26    8.15
  -3  -5  12   53.11    5.76
  -3  -5  11  119.13    8.37
  -3  -5  10    0.34    1.23
  -3  -5   9   42.26    4.72
   3   5  -8    0.15    1.16
  -3  -5   8    1.84    1.59
   3   5  -7    7.69    2.14
  -3  -5   7    9.40    2.28
   3   5  -6    2.34    1.13
   3   5  -6    4.30    0.86
   3   5  -5   78.91    2.87
   3   5  -5   75.56    5.61
   3   5  -4    4.49    1.50
   3   5  -3    0.72    1.10
   3   5  -3    0.23    0.74
   3   5  -2   71.55    5.23
   3   5  -2   72.78    5.60
   3   5  -1  108.01    5.76
   3   5  -1   94.97    6.32
  -3  -5   1   93.24    6.23
  -3  -5   0    8.75    2.06
   3   5   0    6.32    2.03
   3   5   0    9.67    1.78
  -3  -5  -1  210.45    5.38
   3   5   1  212.27    7.72
   3   5   1  217.89    9.62
  -3  -5  -1  224.94    9.68
   3   5   2   18.79    2.37
  -3  -5  -2   25.81    3.44
  -3  -5  -2   21.92    2.06
   3   5   2   19.83    3.16
   3   5   3   69.24    4.49
  -3  -5  -3   70.01    4.03
   3   5   3   66.32    5.55
  -3  -5  -3   63.84    5.43
   3   5   4  346.60   10.21
  -3  -5  -4  348.42    9.92
   3   5   4  347.36   12.58
  -3  -5  -4  346.86   12.74
   3   5   5    0.34    1.21
  -3  -5  -5    1.00    1.26
  -3  -5  -5    1.36    1.09
   3   5   5    2.81    1.84
  -3  -5  -6  243.80    8.83
   3   5   6  235.66    7.84
   3   5   6  242.89   11.26
  -3  -5  -6  252.73   11.39
   3   5   7   30.63    2.84
  -3  -5  -7   22.08    2.86
   3   5   7   22.20    3.94
  -3  -5  -8   27.15    3.22
   3   5   8   23.42    3.88
   3   5   9    7.10    2.38
  -3  -5  -9    6.16    1.83
  -3  -5 -10    2.72    1.64
   3   5  10    1.11    1.76
  -3  -5 -11   46.22    4.64
   3   5  11   53.67    6.00
  -3  -5 -12   11.08    2.51
   3   5  12   15.34    3.82
  -3  -5 -13   -0.89    1.76
   3   5  13    2.17    2.37
  -3  -5 -14   45.26    5.06
   3   5  14   50.56    6.10
   3   5  15   -1.88    1.78
   3   5  16    8.63    2.96
  -3  -6  20   12.25    3.83
  -3  -6  19   14.59    4.20
  -3  -6  18    0.47    2.12
  -3  -6  17   48.04    6.61
  -3  -6  16    6.81    2.46
  -3  -6  15   12.52    3.27
  -3  -6  14    7.51    2.70
  -3  -6  13   37.66    5.22
  -3  -6  12   50.29    5.84
  -3  -6  11    0.61    1.42
  -3  -6  10   28.93    4.15
  -3  -6   9   51.79    5.48
  -3  -6   8    1.36    1.49
   3   6  -7    3.96    1.94
  -3  -6   7    1.85    1.53
   3   6  -6    3.14    1.62
   3   6  -6    2.59    0.65
   3   6  -6    2.09    1.59
   3   6  -5    2.86    1.27
   3   6  -5    1.14    1.27
   3   6  -4    0.66    1.11
   3   6  -4    4.19    1.60
   3   6  -3   -0.47    1.15
   3   6  -3    0.32    1.52
   3   6  -2    6.87    2.00
   3   6  -2    4.18    1.50
  -3  -6   1  100.99    6.70
   3   6  -1  103.60    6.60
   3   6  -1   94.00    6.60
   3   6   0   12.46    2.58
  -3  -6   0   14.00    2.63
   3   6   1    2.08    1.56
  -3  -6  -1    0.18    1.09
   3   6   2   40.69    4.57
  -3  -6  -2   30.35    3.84
   3   6   3  177.17    9.24
  -3  -6  -3  167.56    9.00
  -3  -6  -4   -1.33    1.26
   3   6   4   -0.44    1.47
   3   6   5  145.84    8.67
  -3  -6  -5  155.29    9.01
  -3  -6  -5  138.97    7.07
  -3  -6  -6   70.67    5.20
   3   6   6   73.75    6.46
  -3  -6  -7    0.93    1.21
   3   6   7    4.31    1.59
   3   6   7    3.10    2.31
  -3  -6  -8  165.44    8.26
   3   6   8  171.84    7.21
   3   6   8  165.86    9.97
  -3  -6  -9   13.79    2.69
   3   6   9   17.21    3.37
   3   6  10   40.98    5.26
  -3  -6 -10   41.96    4.50
  -3  -6 -11    1.47    1.51
   3   6  11    1.35    1.90
  -3  -6 -12   13.86    2.93
   3   6  12   12.87    3.22
  -3  -6 -13    4.12    1.65
   3   6  13    3.31    1.82
   3   6  14   -1.42    2.00
   3   6  15    6.27    2.61
  -3  -7  19    4.05    2.77
  -3  -7  18   21.30    4.80
  -3  -7  17    5.00    2.72
  -3  -7  16   25.97    5.24
  -3  -7  15   22.22    4.56
  -3  -7  14   -0.30    1.94
  -3  -7  13   58.17    6.66
  -3  -7  12    0.58    1.77
  -3  -7  11    9.85    2.82
  -3  -7  10    9.16    2.80
  -3  -7   9   30.60    4.49
  -3  -7   8    0.14    1.24
   3   7  -7   13.07    2.93
   3   7  -7   16.08    1.57
  -3  -7   7   13.04    3.01
   3   7  -6   16.07    3.16
   3   7  -6   13.05    1.04
   3   7  -5    8.97    2.60
   3   7  -4    2.28    1.33
   3   7  -4    3.61    1.80
   3   7  -3   90.10    6.56
   3   7  -3   91.30    6.93
   3   7  -2   18.39    2.95
   3   7  -2   19.08    3.25
   3   7  -2   20.84    3.10
   3   7  -1   28.03    3.87
   3   7  -1   26.35    3.45
   3   7  -1   25.10    3.44
   3   7   0    7.89    2.34
  -3  -7   0    4.07    1.61
   3   7   0    4.20    1.62
   3   7   0    3.49    1.53
   3   7   1   11.25    2.66
  -3  -7  -1   17.08    3.04
  -3  -7  -1   15.10    1.22
   3   7   1   19.28    3.05
  -3  -7  -2  112.51    7.55
   3   7   2  112.35    7.56
  -3  -7  -3    4.57    1.69
   3   7   3    5.24    1.86
   3   7   3    5.24    2.04
   3   7   4   89.29    6.24
   3   7   4   79.48    6.58
  -3  -7  -4   80.64    6.57
   3   7   5   41.58    4.35
   3   7   5   41.14    4.90
   3   7   6  103.26    7.02
  -3  -7  -6   90.88    6.32
   3   7   6   88.82    7.23
  -3  -7  -7    7.23    2.09
   3   7   7    9.07    2.85
  -3  -7  -8    3.22    1.56
   3   7   8    4.61    2.24
  -3  -7  -9   42.56    4.60
   3   7   9   36.56    5.19
  -3  -7 -10    3.79    1.71
   3   7  10    1.38    1.87
  -3  -7 -11   25.29    3.80
   3   7  11   26.98    4.52
   3   7  12   24.84    4.30
  -3  -7 -12   25.75    3.94
   3   7  13    5.18    2.81
  -3  -8  18    5.05    3.05
  -3  -8  17   25.46    5.37
  -3  -8  16   14.40    3.87
  -3  -8  15    3.78    2.80
  -3  -8  14   14.03    3.61
  -3  -8  13    4.99    2.54
  -3  -8  12    1.13    2.11
  -3  -8  11   11.82    3.14
  -3  -8  10    0.51    1.42
  -3  -8   9   39.86    5.23
   3   8  -8    6.46    2.12
  -3  -8   8   11.70    3.18
   3   8  -7    2.17    1.72
   3   8  -7    0.80    0.41
   3   8  -6    2.44    1.73
   3   8  -5   -0.57    1.68
   3   8  -4    4.94    2.17
   3   8  -3    1.14    1.67
   3   8  -2   77.68    6.14
   3   8  -2   69.50    6.31
   3   8  -1  162.26    8.81
   3   8  -1  146.49    9.12
   3   8   0   95.95    6.74
   3   8   0   99.90    7.06
   3   8   0   93.20    7.13
   3   8   1   77.00    6.16
   3   8   1   74.12    6.48
   3   8   1   76.13    6.01
   3   8   2   -2.16    1.72
  -3  -8  -2    0.64    0.46
   3   8   2    0.06    1.36
   3   8   2    0.45    1.13
  -3  -8  -3  129.71    5.13
   3   8   3  119.57    8.19
   3   8   3  126.87    7.81
   3   8   4    5.72    1.97
   3   8   4    2.73    1.73
   3   8   5   28.28    4.02
   3   8   5   27.70    4.28
   3   8   6  147.39    8.97
   3   8   6  142.57    8.10
   3   8   6  143.11    9.36
  -3  -8  -7   -0.85    1.51
   3   8   7    1.68    1.22
   3   8   7   -0.60    1.70
  -3  -8  -8   22.58    3.50
   3   8   8   23.06    3.41
   3   8   8   20.83    3.89
  -3  -8  -9   -0.45    1.88
   3   8   9   -2.46    2.16
  -3  -8 -10   52.84    5.50
   3   8  10   48.87    5.69
  -3  -8 -11   12.35    2.96
   3   8  11   13.61    3.67
   3   8  12    4.34    2.37
  -3  -8 -12    2.41    1.87
  -3  -9  17    6.10    2.98
  -3  -9  16    5.13    2.87
  -3  -9  15    2.07    1.77
  -3  -9  14    6.59    2.91
  -3  -9  13    7.85    3.03
  -3  -9  12    8.91    2.90
  -3  -9  11   -1.17    1.90
  -3  -9  10    4.67    2.01
   3   9  -9    0.86    1.53
  -3  -9   9   -0.57    1.59
   3   9  -8   -0.30    0.44
   3   9  -8   -1.56    1.86
   3   9  -7   17.69    3.74
   3   9  -6   -1.16    1.95
   3   9  -5   10.87    2.89
   3   9  -4    1.30    1.43
   3   9  -3  110.85    8.28
   3   9  -2    7.44    2.40
   3   9  -1   68.02    6.44
   3   9   0   17.11    3.47
   3   9   1   28.15    4.23
   3   9   2   71.68    6.63
  -3  -9  -3    2.13    0.71
   3   9   3    3.88    1.88
  -3  -9  -4   15.48    2.01
   3   9   4   13.68    3.09
  -3  -9  -5   55.84    4.18
   3   9   5   60.70    6.33
   3   9   6    2.55    1.65
   3   9   6    1.13    1.59
   3   9   7   50.71    5.17
   3   9   7   49.70    5.87
  -3  -9  -8    1.64    1.35
   3   9   8   -0.96    2.16
  -3  -9  -9   18.42    3.55
   3   9   9   23.37    3.58
   3   9   9   25.85    4.67
   3   9  10   26.57    4.30
  -3  -9 -10   34.62    4.77
  -3  -9 -11    1.41    1.74
   3   9  11    0.41    1.63
  -3 -10  16   15.36    4.41
  -3 -10  15   -2.01    2.06
  -3 -10  14   11.15    3.70
  -3 -10  13    6.78    2.58
  -3 -10  12    4.58    2.55
  -3 -10  11    9.35    3.23
   3  10 -10    0.13    2.06
  -3 -10  10   -1.19    1.49
   3  10  -9    3.32    2.30
  -3 -10   9    2.15    2.15
   3  10  -8   -1.24    2.01
   3  10  -7   10.13    3.29
   3  10  -6   42.87    5.71
   3  10  -5    9.69    3.11
   3  10  -4   40.35    5.40
   3  10  -3    7.34    2.57
   3  10  -2   14.72    3.20
   3  10  -1    3.35    2.03
   3  10   0    3.69    2.20
   3  10   1   45.76    5.55
   3  10   2    1.10    1.82
   3  10   3   38.52    5.22
   3  10   4   32.45    4.80
   3  10   5   25.90    4.08
   3  10   5   27.24    4.49
   3  10   6   64.10    6.27
   3  10   6   57.65    6.46
   3  10   7    0.54    1.40
   3  10   7   -0.19    1.81
   3  10   8   15.31    3.16
   3  10   8   19.63    4.03
   3  10   9   11.76    3.34
  -3 -11  15    6.90    2.95
  -3 -11  14    1.71    2.03
  -3 -11  13    1.38    2.39
   3  11 -12    0.86    2.00
  -3 -11  12    0.91    1.71
   3  11 -11    3.57    2.87
  -3 -11  11   -0.84    2.18
   3  11 -10    0.59    2.18
   3  11  -9    2.73    2.10
   3  11  -8   16.35    3.84
   3  11  -7    5.83    2.56
   3  11  -6    6.15    2.85
   3  11  -5   41.54    5.79
   3  11  -4    1.37    1.51
   3  11  -3   21.07    4.32
   3  11  -2   57.35    6.60
   3  11  -1    1.97    2.03
   3  11   0   39.40    5.47
   3  11   1    8.97    3.12
   3  11   2   22.38    4.17
   3  11   3    1.72    1.83
   3  11   4    1.40    1.80
   3  11   5   51.76    6.17
   3  11   5   44.97    5.73
   3  11   6    0.90    1.66
   3  11   6    0.76    1.83
   3  11   7   10.21    2.74
   3  11   7   14.09    3.64
   3  11   8    4.82    1.96
   3  11   8    4.82    2.61
   3  11   9    3.64    2.55
   3  12 -13    5.35    2.81
  -3 -12  13    1.38    2.72
   3  12 -12    0.30    2.53
  -3 -12  12   -0.18    2.07
   3  12 -11    1.22    1.99
   3  12 -10    2.53    1.95
   3  12  -9    1.09    2.12
   3  12  -8   -2.15    1.98
   3  12  -7    0.26    1.90
   3  12  -6   26.73    4.84
   3  12  -5    4.43    2.12
   3  12  -4   34.45    5.47
   3  12  -3    8.17    3.08
   3  12  -2    6.62    2.71
   3  12  -1   13.92    3.65
   3  12   0    4.32    2.77
   3  12   1   41.06    5.67
   3  12   2   48.88    6.18
   3  12   3   15.94    3.85
   3  12   4   35.92    5.45
   3  12   4   37.20    5.43
   3  12   5    2.93    2.30
   3  12   5    5.86    2.33
   3  12   6   21.84    4.18
   3  12   6   24.18    4.57
   3  12   7    0.17    1.91
   3  12   7    1.30    1.99
   3  13 -12   -1.82    2.15
   3  13 -11   -0.11    2.41
   3  13 -10   -0.07    1.87
   3  13  -9    1.50    2.67
   3  13  -8   18.84    4.63
   3  13  -7    9.06    3.30
   3  13  -6    3.45    2.15
   3  13  -5   17.98    4.29
   3  13  -4   31.10    5.30
   3  13  -3    9.29    3.38
   3  13  -2   29.88    5.40
   3  13  -1    2.00    2.36
   3  13   0   62.14    7.12
   3  13   1    5.72    2.73
   3  13   2   11.46    3.60
   3  13   3   33.63    5.54
   3  13   3   48.09    6.33
   3  13   4   -0.32    2.23
   3  13   4    1.42    2.06
   3  13   5   28.21    5.07
   3  13   5   32.65    5.32
   3  13   6    4.63    2.64
   3  14 -10    3.02    3.00
   3  14  -9    2.32    2.82
   3  14  -8    8.55    3.37
   3  14  -7    3.79    2.88
   3  14  -6   31.60    5.81
   3  14  -5    1.74    1.68
   3  14  -4    1.00    2.56
   3  14  -3    4.64    2.35
   3  14  -2    2.57    2.36
   3  14  -1   15.30    3.86
   3  14   0    9.47    3.17
   3  14   1   36.55    5.77
   3  14   2   17.68    4.30
   3  14   3   10.52    3.59
   3  14   3    9.87    3.28
   3  14   4    8.81    3.06
   3  14   5   -1.41    2.48
   3  14   6    2.31    2.68
   3  15  -8   -2.71    2.64
   3  15  -7    0.67    2.14
   3  15  -6    8.51    3.69
   3  15  -5    3.25    2.41
   3  15  -4    5.61    2.85
   3  15  -3   -1.98    2.78
   3  15  -2   10.34    3.23
   3  15  -1   -3.93    2.57
   3  15   0   11.02    3.48
   3  15   1   15.36    3.96
   3  15   2   -0.58    2.07
   3  15   3    6.19    3.10
   3  15   4    1.77    2.11
   3  16  -5   12.73    3.73
   3  16  -4   -2.03    2.87
   3  16  -3    6.78    3.10
   3  16  -2   -0.54    2.52
   4 -17   6    9.32    3.46
   4 -17   7    6.47    2.49
  -4  16   3    1.59    3.10
  -4  16   2    2.67    3.00
  -4  16   1    4.71    2.40
  -4  16   1    3.01    3.04
  -4  16   0    5.47    3.55
  -4  16   0    1.26    1.44
  -4  16  -1    9.25    4.18
  -4  16  -1    5.43    2.25
  -4  16  -2   14.08    4.39
  -4  16  -2    6.24    2.36
   4 -16   3    5.74    2.23
  -4  16  -3    0.77    3.17
  -4  16  -3   -1.79    1.63
  -4  16  -4    9.30    3.68
   4 -16   4   13.44    3.56
  -4  16  -4    5.99    2.29
   4 -16   5   -6.68    2.64
  -4  16  -5    0.81    2.53
  -4  16  -6    2.92    2.75
   4 -16   6   11.40    3.30
   4 -16   7   23.51    4.81
  -4  16  -7   11.14    3.82
   4 -16   8    1.19    1.82
  -4  16  -8    0.31    2.57
   4 -16   9   40.01    6.37
  -4  15  12    3.51    2.60
   4 -15  -7    0.62    2.00
   4 -15  -6    4.81    2.87
   4 -15  -5    2.05    3.12
   4 -15  -4    0.78    2.15
  -4  15   3    3.36    3.04
  -4  15   2    8.06    3.50
  -4  15   2    1.48    1.55
  -4  15   1    4.42    2.40
  -4  15   1   -0.25    1.55
  -4  15   0   22.26    5.01
  -4  15   0   15.28    3.15
   4 -15   1   14.88    2.94
  -4  15  -1   11.96    3.96
  -4  15  -1   14.14    3.23
   4 -15   2    2.52    1.49
  -4  15  -2    1.98    2.28
   4 -15   3   13.90    3.18
  -4  15  -3   12.09    3.14
  -4  15  -3    7.48    3.36
   4 -15   4    3.44    2.05
  -4  15  -4   -1.44    2.82
   4 -15   5    5.53    2.43
  -4  15  -5    8.59    3.73
  -4  15  -6   19.21    4.63
   4 -15   6   16.29    3.95
   4 -15   7   -2.58    2.07
  -4  15  -7    5.58    2.96
   4 -15   8   25.75    4.91
  -4  15  -8   31.80    5.76
   4 -15   9   -0.14    2.51
  -4  15  -9   10.25    3.87
   4 -15  10   38.74    6.41
  -4  15 -10   26.32    5.45
  -4  15 -11   18.18    4.64
  -4  15 -12   12.31    4.37
  -4  14  13   -7.96    3.24
   4 -14 -10    3.05    2.83
   4 -14  -9   -0.72    2.02
   4 -14  -8   -3.12    2.10
   4 -14  -7    2.03    1.89
   4 -14  -6    7.95    3.66
   4 -14  -5    0.87    2.48
   4 -14  -4    2.50    1.95
   4 -14  -3   -1.63    2.32
  -4  14   3    4.59    3.13
  -4  14   3    5.22    2.41
  -4  14   2   -0.68    2.36
  -4  14   2    0.58    1.57
  -4  14   1   -0.74    1.58
   4 -14  -1    0.97    1.03
   4 -14   0   15.15    2.73
  -4  14   0   14.10    4.02
  -4  14   0   12.95    3.03
   4 -14   1    4.49    1.84
  -4  14  -1   -2.00    2.49
  -4  14  -1    0.55    1.50
   4 -14   2   14.54    3.09
  -4  14  -2    9.89    2.71
  -4  14  -2    5.98    2.76
   4 -14   3    3.33    2.16
  -4  14  -3   -0.30    2.07
   4 -14   4   34.29    4.82
  -4  14  -4   46.05    6.68
   4 -14   5   23.93    4.26
  -4  14  -5   29.72    5.44
   4 -14   6   13.98    3.38
  -4  14  -6   22.02    4.78
  -4  14  -7   41.80    6.51
   4 -14   7   42.77    6.07
   4 -14   8   -3.50    2.34
  -4  14  -8   -0.71    2.19
   4 -14   9   17.73    4.45
  -4  14  -9   13.37    4.14
   4 -14  10   26.97    5.35
  -4  14 -10   29.23    5.49
   4 -14  11    2.60    2.18
  -4  14 -11   -3.04    2.48
  -4  14 -12   25.52    5.38
  -4  13  14    3.85    2.44
  -4  13  13    8.83    3.01
   4 -13 -12    0.59    1.93
   4 -13 -11   -0.04    1.90
   4 -13 -10    1.20    2.52
   4 -13  -9    1.43    1.95
   4 -13  -8    2.62    2.88
   4 -13  -7    0.38    2.12
   4 -13  -6    1.60    2.45
   4 -13  -5    0.53    1.91
   4 -13  -4    0.09    1.76
   4 -13  -3    0.44    1.96
  -4  13   3    5.10    3.01
  -4  13   3    2.28    1.72
  -4  13   2   -0.53    0.79
  -4  13   2    0.02    1.71
  -4  13   2   -0.79    1.55
   4 -13  -2   -0.91    2.07
  -4  13   1    5.86    1.58
  -4  13   1    9.06    3.43
  -4  13   1    1.94    1.47
   4 -13   0    6.59    1.87
  -4  13   0    5.95    3.08
  -4  13   0    4.33    1.89
  -4  13   0    9.34    2.80
  -4  13  -1   40.00    4.99
  -4  13  -1   50.88    6.54
   4 -13   1   44.36    4.62
   4 -13   2    3.40    1.45
  -4  13  -2   11.07    3.57
   4 -13   3   40.40    4.91
  -4  13  -3   44.45    6.19
   4 -13   4   17.18    3.39
  -4  13  -4   10.31    3.29
   4 -13   5   39.70    5.20
  -4  13  -5   50.09    6.51
   4 -13   6   43.62    5.75
  -4  13  -6   52.77    6.81
   4 -13   7    1.97    1.67
  -4  13  -7   -0.13    2.14
  -4  13  -8   72.93    7.82
   4 -13   8   71.55    7.81
   4 -13   9    6.05    2.80
  -4  13  -9    3.93    2.28
   4 -13  10    3.13    2.67
  -4  13 -10   -0.27    2.55
   4 -13  11   32.15    5.83
  -4  13 -11   32.80    5.39
   4 -13  12    5.41    3.04
  -4  13 -12   -3.61    2.52
  -4  12  15    7.72    3.42
  -4  12  14    3.29    2.18
   4 -12 -13   -0.11    1.89
   4 -12 -12    2.32    2.47
   4 -12 -11   10.14    3.27
   4 -12 -10   11.07    3.54
   4 -12  -9    1.79    2.58
   4 -12  -8    0.78    1.78
   4 -12  -7    4.75    2.30
   4 -12  -6    0.04    1.61
   4 -12  -5    5.74    2.87
   4 -12  -4    3.77    2.21
  -4  12   4    2.73    1.76
   4 -12  -3   19.94    4.05
  -4  12   3   25.46    4.03
  -4  12   3   21.86    2.01
   4 -12  -3   23.74    2.33
  -4  12   3   33.50    5.54
  -4  12   3   22.51    2.01
   4 -12  -2    6.87    2.62
   4 -12  -2    5.45    1.40
  -4  12   2    8.40    3.08
  -4  12   2    3.03    1.90
  -4  12   2    2.70    1.01
  -4  12   2    4.86    1.49
  -4  12   1    6.68    3.08
  -4  12   1    6.17    2.28
  -4  12   1    6.11    1.76
   4 -12   0   24.15    3.18
  -4  12   0   21.89    4.48
  -4  12   0   23.20    3.72
  -4  12   0   26.36    3.40
  -4  12  -1    4.82    1.64
   4 -12   1    5.58    1.85
  -4  12  -1    1.49    1.60
   4 -12   2   14.37    2.90
  -4  12  -2   16.68    4.01
   4 -12   3   -1.04    1.26
  -4  12  -3   -0.22    1.83
   4 -12   4   16.72    3.48
  -4  12  -4   22.60    4.34
  -4  12  -5   94.06    8.32
   4 -12   5   81.62    7.25
  -4  12  -6   20.15    3.79
   4 -12   6   18.78    3.74
  -4  12  -7   45.34    5.87
   4 -12   7   35.64    5.32
  -4  12  -8    3.93    2.08
   4 -12   8    1.80    2.09
  -4  12  -9   28.39    4.86
   4 -12   9   28.47    5.06
  -4  12 -10   25.56    4.56
   4 -12  10   22.98    4.76
  -4  12 -11    0.08    1.80
   4 -12  11    2.67    2.22
  -4  12 -12   14.53    3.45
   4 -12  12   26.91    5.25
   4 -12  13   -2.93    2.56
  -4  11  16    4.59    3.00
   4 -11 -15    1.57    2.38
  -4  11  15    0.38    1.67
   4 -11 -14   11.19    3.98
  -4  11  14    7.28    2.98
   4 -11 -13   -2.77    2.73
   4 -11 -12    0.62    2.40
   4 -11 -11    1.55    2.31
   4 -11 -10   -2.32    2.48
   4 -11  -9   -0.60    2.15
   4 -11  -8    1.96    2.25
   4 -11  -7    3.87    2.40
   4 -11  -6   12.03    3.52
   4 -11  -5    8.26    3.00
   4 -11  -4   24.46    4.30
  -4  11   4   16.55    3.26
  -4  11   3   10.30    1.36
   4 -11  -3    7.71    2.59
  -4  11   3    9.95    3.02
  -4  11   3    9.45    1.33
  -4  11   3   11.08    2.80
   4 -11  -3    5.72    1.16
   4 -11  -2    0.86    0.78
   4 -11  -2    0.32    1.60
  -4  11   2    1.24    1.08
  -4  11   2    1.22    2.40
  -4  11   2   -0.83    1.65
   4 -11  -1  117.43    8.87
  -4  11   1  111.70    8.93
  -4  11   1  109.51    7.64
  -4  11   1  110.87    6.16
  -4  11   0   11.43    2.66
  -4  11   0   14.99    3.67
  -4  11   0    4.16    1.63
  -4  11  -1   66.47    5.43
  -4  11  -1   63.16    6.84
   4 -11   1   60.04    5.10
  -4  11  -2   48.04    4.89
  -4  11  -2   44.11    5.75
   4 -11   2   49.20    4.86
  -4  11  -3   31.73    4.74
   4 -11   3   35.58    4.31
  -4  11  -4   27.05    4.45
   4 -11   4   22.20    3.62
  -4  11  -5   -0.36    2.05
   4 -11   5    2.27    1.93
   4 -11   6   41.36    5.34
  -4  11  -6   39.05    5.31
  -4  11  -7   18.82    3.71
   4 -11   7   26.88    4.49
  -4  11  -8   54.88    6.19
   4 -11   8   52.25    6.35
  -4  11  -9   26.00    4.42
   4 -11   9   30.91    5.14
  -4  11 -10    4.69    2.18
   4 -11  10    1.06    2.25
  -4  11 -11   28.85    4.64
   4 -11  11   27.33    5.00
  -4  11 -12    1.34    1.72
   4 -11  12    1.94    2.30
  -4  11 -13   26.82    4.42
   4 -11  13   28.54    5.58
   4 -10 -16    2.27    3.08
  -4  10  16   10.32    3.89
   4 -10 -15    9.03    3.37
  -4  10  15    5.54    2.65
   4 -10 -14    6.61    2.97
  -4  10  14    8.40    3.26
   4 -10 -13    7.28    3.42
   4 -10 -12    0.36    2.22
   4 -10 -11   -1.47    2.56
   4 -10 -10    2.17    2.11
   4 -10  -9    0.51    2.02
   4 -10  -8   -1.76    2.22
   4 -10  -7   11.53    3.33
   4 -10  -6   21.44    4.01
   4 -10  -5    1.47    2.08
  -4  10   5   -0.81    1.49
  -4  10   4   36.86    4.48
   4 -10  -4   33.03    2.06
   4 -10  -4   32.68    4.81
  -4  10   3  126.65    4.25
   4 -10  -3  122.59    8.74
  -4  10   3  120.97    7.89
  -4  10   3  117.01    4.14
   4 -10  -3  121.22    4.84
  -4  10   2    3.26    2.80
   4 -10  -2    0.40    1.61
   4 -10  -2    0.84    0.73
  -4  10   2    0.99    1.34
  -4  10   1   56.66    6.31
  -4  10   1   51.49    5.07
   4 -10  -1   48.57    5.36
  -4  10   1   53.21    4.18
   4 -10  -1   45.19    3.74
   4 -10   0  120.57    8.46
  -4  10   0  110.71    8.38
  -4  10   0  124.36    6.70
  -4  10  -1   46.88    4.44
  -4  10  -1   43.65    5.40
  -4  10  -2   39.62    5.05
  -4  10  -2   37.00    4.23
   4 -10   2   39.28    4.27
  -4  10  -3   47.56    5.04
   4 -10   3   47.16    4.79
  -4  10  -3   36.34    4.75
  -4  10  -4    5.76    2.53
   4 -10   4    1.11    1.71
   4 -10   5   77.05    6.68
  -4  10  -5   87.16    7.37
  -4  10  -6    8.17    2.53
   4 -10   6    6.62    2.39
  -4  10  -7    3.00    1.80
   4 -10   7    9.55    2.78
  -4  10  -8   23.59    3.92
   4 -10   8   23.70    4.60
  -4  10  -9   -2.56    2.14
   4 -10   9    0.53    1.72
  -4  10 -10   27.55    4.27
   4 -10  10   29.81    5.09
  -4  10 -11   -2.89    1.96
   4 -10  11    0.51    2.05
  -4  10 -12   15.38    3.26
   4 -10  12   11.49    3.52
  -4  10 -13   12.76    3.17
   4 -10  13   10.95    3.56
   4 -10  14    5.60    3.94
   4  -9 -17    3.85    3.31
  -4   9  17    0.89    2.04
   4  -9 -16    5.91    3.63
  -4   9  16    5.52    2.92
   4  -9 -15   -1.89    2.61
  -4   9  15    3.18    2.49
   4  -9 -14    2.06    2.54
  -4   9  14    0.03    1.88
   4  -9 -13   -0.56    2.56
   4  -9 -12   -5.65    2.92
   4  -9 -11    2.20    2.13
   4  -9 -10    0.57    2.26
   4  -9  -9   60.80    6.85
   4  -9  -8    1.99    1.99
   4  -9  -7   13.49    3.16
   4  -9  -6   13.92    3.03
   4  -9  -5   34.19    4.77
  -4   9   5   44.12    4.87
   4  -9  -4    5.38    2.09
  -4   9   4    4.88    1.70
   4  -9  -4    4.08    0.81
  -4   9   3   25.83    3.69
  -4   9   3   30.03    2.02
   4  -9  -3   31.68    4.39
   4  -9  -3   25.95    2.22
   4  -9  -2    5.10    2.09
  -4   9   2    7.25    3.20
  -4   9   2    2.46    1.45
   4  -9  -2    6.76    1.45
  -4   9   2    4.43    1.14
  -4   9   1  166.36    9.82
   4  -9  -1  184.69    7.25
   4  -9  -1  175.85    9.58
   4  -9   0   17.89    3.28
  -4   9   0   19.38    3.32
  -4   9   0   19.00    3.77
  -4   9   0   17.68    2.66
  -4   9  -1   79.95    6.46
  -4   9  -1   88.15    7.06
  -4   9  -1   90.86    5.98
  -4   9  -2   48.97    5.04
   4  -9   2   46.77    4.54
  -4   9  -2   43.18    5.08
  -4   9  -2   41.42    4.37
  -4   9  -3   66.67    5.84
   4  -9   3   61.23    5.34
  -4   9  -3   51.26    5.06
  -4   9  -3   57.65    5.74
  -4   9  -4  209.50   10.42
   4  -9   4  194.92    9.89
  -4   9  -4  206.73   10.52
  -4   9  -4  215.87   10.42
   4  -9   5   31.45    4.31
  -4   9  -5   25.52    3.73
  -4   9  -6  132.19    8.35
   4  -9   6  139.72    9.07
   4  -9   7   97.16    8.01
  -4   9  -7   94.15    7.11
   4  -9   8   33.38    4.94
  -4   9  -8   32.85    4.28
   4  -9   9  114.13    9.28
  -4   9  -9  126.64    8.11
   4  -9  10    6.32    2.49
  -4   9 -10    4.80    1.86
  -4   9 -11   14.64    3.02
   4  -9  11   19.08    4.17
  -4   9 -12   11.67    2.81
   4  -9  12   15.73    3.89
  -4   9 -13    0.71    1.33
   4  -9  13    6.84    3.55
   4  -9  14   -4.41    2.77
   4  -9  15    1.14    2.68
   4  -8 -18    9.05    3.90
   4  -8 -17    8.17    3.49
  -4   8  17    7.83    2.67
   4  -8 -16    1.71    1.80
  -4   8  16   -1.96    1.91
   4  -8 -15    3.46    2.77
  -4   8  15    1.12    1.99
   4  -8 -14   -0.57    2.56
  -4   8  14   -0.85    2.11
   4  -8 -13    4.58    2.27
   4  -8 -12    3.50    2.47
   4  -8 -11   -0.14    1.82
   4  -8 -10   -1.40    1.73
   4  -8  -9    6.46    3.03
   4  -8  -8    0.51    2.16
   4  -8  -7    1.46    1.85
   4  -8  -6    0.71    1.92
  -4   8   6    1.08    1.30
   4  -8  -5   27.55    4.04
  -4   8   5   32.58    4.13
   4  -8  -4    3.52    1.99
   4  -8  -4    4.96    0.85
  -4   8   4    4.04    1.69
  -4   8   4    4.60    2.12
   4  -8  -3   96.27    6.97
   4  -8  -3   93.45    4.01
   4  -8  -3   86.02    6.70
  -4   8   3   83.70    6.15
  -4   8   3  104.67    7.38
  -4   8   3   90.22    3.30
   4  -8  -2  145.61    8.35
   4  -8  -2  152.92    5.77
  -4   8   2  147.36    8.08
  -4   8   2  129.44    4.85
  -4   8   1   24.50    3.46
   4  -8  -1   22.48    2.56
   4  -8  -1   20.63    3.27
  -4   8   1   24.28    3.92
  -4   8   1   24.99    2.56
  -4   8   0  195.33    9.45
   4  -8   0  181.49    9.14
   4  -8   0  178.54    7.47
  -4   8   0  191.22    9.82
  -4   8  -1  199.20    9.96
  -4   8  -1  194.41    8.40
  -4   8  -1  205.37    9.58
  -4   8  -2   99.69    6.93
  -4   8  -2  111.49    6.77
  -4   8  -2  107.36    6.90
  -4   8  -3   30.84    3.75
   4  -8   3   29.16    3.75
  -4   8  -3   30.60    3.90
  -4   8  -3   24.99    3.64
  -4   8  -4    2.00    1.64
  -4   8  -4    1.62    1.03
   4  -8   4    1.36    1.56
  -4   8  -4    4.41    1.99
  -4   8  -5   66.32    5.46
   4  -8   5   51.30    5.26
  -4   8  -5   50.42    4.95
  -4   8  -6   14.21    2.79
   4  -8   6   11.62    2.92
  -4   8  -6   11.11    2.52
  -4   8  -7   36.58    4.23
  -4   8  -7   43.59    4.51
   4  -8   7   32.39    4.57
  -4   8  -8   77.93    6.21
   4  -8   8   64.93    6.59
  -4   8  -8   71.01    5.77
   4  -8   9    6.05    2.45
  -4   8  -9    6.36    2.15
   4  -8  10   13.74    3.62
  -4   8 -10   15.94    2.88
   4  -8  11   37.34    5.57
  -4   8 -11   36.39    4.07
   4  -8  12    6.91    2.64
  -4   8 -12    6.58    2.17
   4  -8  13   21.22    4.80
   4  -8  14    3.88    2.79
   4  -8  15   -3.01    2.69
  -4   7  18    7.43    3.51
   4  -7 -18    9.00    4.09
   4  -7 -17    1.36    2.92
  -4   7  17    0.95    2.12
   4  -7 -16    4.36    3.14
  -4   7  16    0.35    1.88
   4  -7 -15    2.87    2.55
  -4   7  15    1.77    2.04
   4  -7 -14   13.40    3.87
   4  -7 -13   -0.12    2.06
   4  -7 -12    5.06    2.52
   4  -7 -11    1.08    1.93
   4  -7 -10    5.23    2.64
   4  -7  -9   15.06    3.60
   4  -7  -8    4.65    2.35
   4  -7  -7    0.76    1.94
  -4   7   6   25.76    4.30
   4  -7  -6   23.91    3.85
   4  -7  -6   17.64    3.18
  -4   7   6   26.36    3.74
  -4   7   5   33.98    4.71
   4  -7  -5   27.01    3.77
   4  -7  -5   29.48    4.04
  -4   7   5   27.11    3.63
  -4   7   4  124.28    7.85
   4  -7  -4   98.08    6.79
   4  -7  -4  114.37    3.71
   4  -7  -4  125.79    7.77
  -4   7   4  107.81    6.90
   4  -7  -3   94.03    6.52
   4  -7  -3  104.02    4.17
   4  -7  -3   94.88    6.72
  -4   7   3  101.79    6.57
  -4   7   3   98.17    3.44
  -4   7   3  110.29    7.15
  -4   7   2   99.62    6.66
   4  -7  -2  104.20    6.88
  -4   7   2   95.43    6.34
   4  -7  -2   97.38    4.61
   4  -7  -2  100.95    6.63
  -4   7   2   92.61    4.07
   4  -7  -1  119.13    7.01
   4  -7  -1  128.36    7.53
   4  -7  -1  127.34    5.70
  -4   7   1  129.13    5.38
  -4   7   1  138.01    7.58
   4  -7   0   53.78    4.69
  -4   7   0   61.99    5.08
  -4   7   0   69.68    5.73
   4  -7   0   66.81    4.56
  -4   7   0   61.94    4.23
  -4   7  -1   63.14    4.96
  -4   7  -1   62.74    5.32
  -4   7  -1   61.26    4.47
   4  -7   1   60.11    4.91
  -4   7  -2   79.71    5.55
  -4   7  -2   75.26    5.48
  -4   7  -2   74.03    5.70
  -4   7  -3   31.71    3.54
  -4   7  -3   31.26    3.86
  -4   7  -3   40.06    4.27
  -4   7  -4  260.12    9.87
  -4   7  -4  241.94    9.86
   4  -7   4  249.37   10.73
  -4   7  -4  266.14   11.12
  -4   7  -5   19.14    3.02
   4  -7   5   19.05    3.33
  -4   7  -5   21.13    2.98
  -4   7  -5   27.48    3.99
  -4   7  -6  162.72    7.98
  -4   7  -6  159.77    7.97
   4  -7   6  160.50    9.47
  -4   7  -7  149.92    7.92
   4  -7   7  155.55    9.64
  -4   7  -7  162.66    8.04
  -4   7  -8    0.98    1.27
   4  -7   8    1.13    1.58
  -4   7  -8    1.59    1.32
  -4   7  -9  164.57    8.73
  -4   7  -9  175.44    8.19
   4  -7   9  167.04   10.72
   4  -7  10   -0.43    1.89
  -4   7 -10    2.58    1.47
   4  -7  11    0.35    1.78
  -4   7 -11    0.59    1.20
   4  -7  12   27.03    4.91
  -4   7 -12   29.53    3.41
   4  -7  13   -3.77    2.87
   4  -7  14   -4.66    3.40
   4  -7  15    2.92    2.35
   4  -7  16    0.59    3.00
   4  -6 -19    2.52    3.44
  -4   6  19    6.97    2.99
   4  -6 -18   -2.51    3.64
  -4   6  18    1.55    2.03
  -4   6  17    2.54    1.61
   4  -6 -17    4.63    2.85
   4  -6 -16    1.56    2.76
  -4   6  16   -0.11    2.23
   4  -6 -15    1.28    2.38
  -4   6  15    2.54    2.21
   4  -6 -14   -2.87    2.77
  -4   6  14   -0.67    2.18
   4  -6 -13   -0.29    2.80
   4  -6 -13    4.57    1.06
   4  -6 -12    3.72    2.50
   4  -6 -12    3.09    0.76
   4  -6 -12    4.21    0.85
   4  -6 -11   16.01    3.70
   4  -6 -11   12.16    1.10
   4  -6 -11   12.00    1.05
   4  -6 -10   28.16    4.68
   4  -6  -9   58.19    6.07
   4  -6  -8   11.11    3.12
   4  -6  -8    7.87    2.30
   4  -6  -7   68.49    5.94
   4  -6  -7   68.91    5.66
   4  -6  -7   59.02    5.72
   4  -6  -6    8.23    2.50
   4  -6  -6    9.21    2.44
  -4   6   6    6.59    2.01
   4  -6  -5   85.92    6.29
   4  -6  -5  109.73    7.12
  -4   6   5  106.71    6.79
  -4   6   5  119.59    7.65
   4  -6  -5   96.77    2.93
  -4   6   4  116.85    7.33
   4  -6  -4  126.03    7.55
  -4   6   4  118.07    6.97
   4  -6  -4  113.32    3.89
   4  -6  -4  118.43    7.05
  -4   6   4  105.25    2.91
  -4   6   3    3.96    1.82
   4  -6  -3    1.84    1.53
  -4   6   3    2.69    1.36
   4  -6  -3    3.45    1.55
   4  -6  -3    5.21    1.15
  -4   6   3    4.02    0.85
   4  -6  -2  336.10   11.03
  -4   6   2  337.70   11.34
   4  -6  -2  322.82   11.48
  -4   6   2  318.06    7.43
   4  -6  -2  319.79    8.20
  -4   6   1    3.93    1.76
   4  -6  -1    2.92    1.08
   4  -6  -1    3.33    1.47
   4  -6  -1    1.86    1.18
  -4   6   1    3.87    1.17
   4  -6   0    0.03    1.13
   4  -6   0    1.27    1.15
   4  -6   0   -0.29    1.14
  -4   6   0    0.48    0.97
  -4   6   0   -0.31    1.12
  -4   6  -1   33.17    3.40
  -4   6  -1   29.86    3.10
   4  -6   1   31.08    3.34
   4  -6   1   30.47    3.19
  -4   6  -2    3.48    1.32
  -4   6  -2    6.99    2.16
  -4   6  -2    5.08    1.65
  -4   6  -3   94.84    5.49
  -4   6  -3   87.89    5.69
  -4   6  -3   87.07    5.97
  -4   6  -4    4.12    1.35
  -4   6  -4    4.75    1.93
  -4   6  -4    3.85    1.92
   4  -6   4    3.45    1.97
  -4   6  -5   22.54    2.79
  -4   6  -5   25.30    3.19
  -4   6  -5   27.19    4.00
   4  -6   5   26.10    3.72
  -4   6  -6   41.06    3.83
  -4   6  -6   42.66    3.91
   4  -6   6   37.16    4.60
  -4   6  -7   45.41    3.99
  -4   6  -7   42.82    3.97
   4  -6   7   50.88    5.70
  -4   6  -8    7.80    1.86
  -4   6  -8    6.25    1.66
   4  -6   8    8.31    2.51
  -4   6  -9   85.05    5.18
   4  -6   9   91.68    7.89
   4  -6  10   18.39    3.92
  -4   6 -10   26.67    2.92
  -4   6 -11   29.27    2.98
   4  -6  11   28.02    4.86
   4  -6  12   -0.76    2.10
  -4   6 -12    4.38    1.36
   4  -6  13    8.30    3.53
   4  -6  14   -0.59    2.38
   4  -6  15   -0.66    2.76
   4  -6  16   -1.41    2.29
  -4   5  19    3.54    2.53
   4  -5 -19   -0.68    2.40
  -4   5  18    0.51    1.88
   4  -5 -18    5.44    3.74
   4  -5 -17    6.93    3.83
  -4   5  17    5.65    2.88
   4  -5 -16   10.97    4.22
  -4   5  16   11.19    3.87
   4  -5 -15    1.12    2.35
  -4   5  15   -0.43    2.11
   4  -5 -14    2.73    2.28
  -4   5  14    0.52    2.11
   4  -5 -14    1.10    1.05
   4  -5 -13    2.54    2.64
   4  -5 -13    0.53    0.60
   4  -5 -12   14.87    3.87
   4  -5 -12   13.16    1.54
   4  -5 -11    6.43    1.06
   4  -5 -11    3.35    0.89
   4  -5 -10   17.36    1.58
   4  -5 -10   19.01    3.75
   4  -5 -10   16.85    1.39
   4  -5  -9   -0.38    1.76
   4  -5  -9    0.27    0.38
   4  -5  -9    0.66    0.40
   4  -5  -8   39.26    4.81
   4  -5  -8   36.19    1.67
   4  -5  -8   48.04    4.77
   4  -5  -8   35.40    1.65
   4  -5  -7    3.98    0.60
   4  -5  -7    3.89    1.93
  -4   5   6  236.50    9.96
   4  -5  -6  241.32   10.38
   4  -5  -6  215.84    3.57
   4  -5  -6  229.59    4.62
   4  -5  -6  224.23   10.10
   4  -5  -5  136.50    7.56
   4  -5  -5  152.57    8.17
  -4   5   5  143.37    7.60
  -4   5   4   39.49    4.17
   4  -5  -4   35.59    3.76
   4  -5  -4   46.81    4.50
  -4   5   4   33.71    3.67
   4  -5  -4   28.03    2.17
  -4   5   4   36.02    2.01
   4  -5  -3  425.92   12.14
   4  -5  -3  415.14    8.79
   4  -5  -3  434.35   12.94
  -4   5   3  431.59   12.55
  -4   5   3  434.78    7.98
  -4   5   3  453.91   12.85
   4  -5  -2   19.32    2.65
  -4   5   2   24.10    2.94
   4  -5  -2   23.24    2.35
   4  -5  -2   23.98    3.11
  -4   5   2   22.33    2.09
   4  -5  -1   91.70    5.29
   4  -5  -1   96.86    4.98
   4  -5  -1  102.98    6.01
  -4   5   1  107.19    5.73
  -4   5   1   94.79    4.57
  -4   5   0  421.21   10.90
   4  -5   0  404.65   10.53
   4  -5   0  399.96   10.72
   4  -5   0  431.60   11.97
  -4   5   0  407.94   10.30
  -4   5  -1  102.43    5.30
   4  -5   1  106.50    5.91
   4  -5   1  106.01    5.81
  -4   5  -1  109.66    5.81
   4  -5   1  104.79    5.28
  -4   5  -2   24.81    2.60
  -4   5  -2   29.72    3.32
  -4   5  -3   49.41    3.61
  -4   5  -3   49.78    4.47
  -4   5  -4  138.12    5.99
  -4   5  -4  152.08    8.06
   4  -5   4  139.20    7.89
   4  -5   5   19.57    3.36
  -4   5  -5   26.06    3.02
  -4   5  -5   22.51    2.56
  -4   5  -5   23.55    3.62
   4  -5   6    3.20    1.65
  -4   5  -6    0.60    0.76
  -4   5  -6    1.00    1.49
  -4   5  -6   -0.05    1.13
  -4   5  -7  213.03    8.09
  -4   5  -7  228.13    7.81
   4  -5   7  226.93   11.21
  -4   5  -8    2.05    1.29
   4  -5   8   -1.36    1.95
  -4   5  -9    9.40    1.75
   4  -5   9    7.47    2.76
  -4   5 -10    4.17    1.43
   4  -5  10    0.84    2.00
   4  -5  11   -0.17    1.76
   4  -5  12   16.08    4.00
   4  -5  13    1.79    2.51
   4  -5  14    2.15    2.09
   4  -5  15    1.11    2.14
   4  -5  16    5.73    3.23
   4  -5  17   -0.58    2.53
   4  -4 -20    0.13    2.61
   4  -4 -19    4.09    3.16
  -4   4  19    8.17    3.64
   4  -4 -18    8.74    4.02
  -4   4  18    5.35    2.84
   4  -4 -17    1.59    3.26
  -4   4  17    0.93    1.96
  -4   4  17   -0.61    1.07
   4  -4 -16    1.65    2.72
  -4   4  16   -2.08    2.65
  -4   4  16   -0.81    1.29
   4  -4 -15    9.61    4.20
   4  -4 -15    6.85    1.83
  -4   4  15    2.76    1.70
  -4   4  15    6.24    1.68
  -4   4  14    2.00    2.02
   4  -4 -14    4.24    1.36
  -4   4  14    3.97    1.34
   4  -4 -13    1.95    2.47
   4  -4 -13    0.96    0.85
   4  -4 -12    3.36    2.40
   4  -4 -12    7.48    1.51
   4  -4 -11   60.67    3.51
   4  -4 -11   63.46    6.69
   4  -4 -10    2.02    2.20
   4  -4 -10   -0.41    0.65
   4  -4 -10    0.09    0.61
   4  -4  -9  207.57   10.83
   4  -4  -9  224.45    6.13
   4  -4  -9  242.95   10.74
   4  -4  -9  219.91    5.82
   4  -4  -8    0.46    1.56
   4  -4  -8    1.90    0.73
   4  -4  -8    0.84    0.59
   4  -4  -7  168.72    8.97
   4  -4  -7  173.46    4.77
   4  -4  -7  175.86    4.86
   4  -4  -6  109.52    6.89
  -4   4   6  109.88    6.58
   4  -4  -6  110.19    3.71
   4  -4  -6  118.20    4.03
  -4   4   5  105.62    6.26
   4  -4  -5  111.20    3.80
   4  -4  -5  105.97    6.35
  -4   4   4  205.69    8.51
   4  -4  -4  200.24    5.36
   4  -4  -4  197.95    8.18
  -4   4   4  200.21    5.36
   4  -4  -3   33.89    3.42
  -4   4   3   32.94    3.46
   4  -4  -3   36.86    2.56
  -4   4   3   31.77    2.37
  -4   4   2  264.94    8.75
   4  -4  -2  258.50    8.43
   4  -4  -2  261.40    9.31
   4  -4  -2  253.14    7.09
  -4   4   2  267.91    7.20
  -4   4   1   71.19    4.30
   4  -4  -1   68.11    4.14
   4  -4  -1   72.98    4.79
  -4   4   1   75.31    4.17
   4  -4  -1   73.10    4.42
  -4   4   0    1.18    1.02
   4  -4   0   -0.85    0.76
   4  -4   0    0.43    1.09
   4  -4   0    1.60    1.13
  -4   4   0    0.60    0.78
  -4   4  -1  574.57   11.10
   4  -4   1  564.86   10.77
   4  -4   1  534.03   13.12
   4  -4   1  552.85   12.42
  -4   4  -1  588.49   13.22
  -4   4  -2   69.79    3.80
   4  -4   2   67.71    4.27
  -4   4  -2   68.66    4.85
  -4   4  -3  448.14    9.37
  -4   4  -3  480.34   13.36
  -4   4  -4  115.50    4.85
  -4   4  -4  123.77    7.26
  -4   4  -5   47.67    3.23
  -4   4  -5   49.54    4.87
  -4   4  -6   54.12    5.44
  -4   4  -6   53.91    3.60
   4  -4   6   53.11    5.32
   4  -4   7    5.88    2.23
   4  -4   8   16.26    3.46
   4  -4   9   17.68    3.76
   4  -4  10   10.50    3.23
   4  -4  11    2.01    2.36
   4  -4  12    2.37    2.51
   4  -4  13   -0.31    2.12
   4  -4  14   -0.22    2.54
   4  -4  15    5.08    2.95
   4  -4  16   -1.70    2.46
   4  -4  17   -0.90    2.54
   4  -3 -20    3.17    3.97
  -4   3  20    1.72    1.83
   4  -3 -19   10.18    4.60
  -4   3  19    2.34    2.24
  -4   3  18    3.90    2.37
  -4   3  18    3.60    1.83
   4  -3 -18    6.04    4.69
  -4   3  17    8.41    3.28
  -4   3  17   10.52    2.38
  -4   3  16    9.75    3.10
   4  -3 -16   11.56    4.02
  -4   3  16    9.39    2.20
  -4   3  15    0.82    1.79
   4  -3 -15   -0.03    1.40
  -4   3  15   -0.26    1.03
   4  -3 -14   -0.25    0.97
  -4   3  14   -0.68    1.99
  -4   3  14    0.82    0.82
  -4   3  13   12.90    2.12
   4  -3 -13   15.04    2.40
   4  -3 -12   79.91    4.78
  -4   3  12   87.65    4.99
   4  -3 -11   34.00    3.03
   4  -3 -10   99.99    4.77
   4  -3 -10   95.31    6.89
   4  -3  -9   88.53    4.31
   4  -3  -9   84.63    4.35
   4  -3  -9   88.13    6.35
   4  -3  -8  263.52   10.49
   4  -3  -8  250.77    6.91
   4  -3  -8  237.83    6.92
   4  -3  -7   91.78    6.55
   4  -3  -7   90.19    4.05
   4  -3  -7   97.32    4.21
  -4   3   6  119.45    6.67
   4  -3  -6  117.62    6.92
   4  -3  -6  119.08    4.56
   4  -3  -6  122.70    4.62
   4  -3  -5  225.52    9.11
  -4   3   5  240.76    9.03
   4  -3  -5  239.54    6.45
  -4   3   4    6.96    1.19
  -4   3   4    8.19    1.98
   4  -3  -4    6.79    1.75
   4  -3  -4    5.14    1.16
   4  -3  -3  236.87    7.99
  -4   3   3  242.08    8.70
   4  -3  -3  230.10    6.68
  -4   3   3  236.58    6.79
   4  -3  -2  190.42    6.77
   4  -3  -2  195.85    6.56
  -4   3   2  205.05    6.69
   4  -3  -1  254.82    7.16
  -4   3   1  256.34    7.47
   4  -3  -1  257.95    7.98
  -4   3   1  266.02    8.03
   4  -3   0  377.80    8.10
  -4   3   0  384.96    8.45
   4  -3   0  384.05   10.27
  -4   3   0  380.99   10.12
   4  -3   1   13.21    1.51
  -4   3  -1   12.67    1.60
   4  -3   1   13.48    2.49
   4  -3   1   13.98    2.06
   4  -3   1   13.68    2.31
  -4   3  -1   13.89    2.12
  -4   3  -2  720.40   10.22
   4  -3   2  730.14   12.70
  -4   3  -2  739.01   15.76
  -4   3  -3  173.57    4.91
   4  -3   3  177.53    5.98
  -4   3  -3  185.78    8.35
  -4   3  -4  126.24    4.25
  -4   3  -4  136.49    7.51
  -4   3  -5   71.19    3.36
  -4   3  -5   75.51    5.92
   4  -3   6    4.37    2.02
  -4   3  -6    5.74    1.91
   4  -3   7   91.91    7.17
   4  -3   8    1.76    1.51
   4  -3   9    0.43    1.87
   4  -3  10   11.29    3.16
   4  -3  11    2.14    2.24
   4  -3  12    1.55    2.06
   4  -3  13    8.51    3.04
   4  -3  14    2.74    2.33
   4  -3  15    3.48    2.29
   4  -3  16    3.47    2.68
   4  -3  17    9.53    3.28
  -4   2  20    1.27    2.42
  -4   2  19    1.81    1.66
  -4   2  19    0.44    2.45
  -4   2  18    7.86    2.15
  -4   2  18   10.79    3.36
  -4   2  17    1.74    1.23
  -4   2  17   -0.35    2.47
   4  -2 -16   14.41    2.82
  -4   2  16   10.48    3.16
  -4   2  16   11.63    2.50
  -4   2  15    0.49    1.72
   4  -2 -15    0.97    1.13
  -4   2  15    0.90    0.97
  -4   2  14    3.13    2.13
   4  -2 -14    2.03    1.28
  -4   2  14    0.58    0.97
  -4   2  13   -1.27    1.58
   4  -2 -13    3.10    1.36
  -4   2  13    1.78    1.10
   4  -2 -12    5.62    1.59
  -4   2  12    2.97    1.04
   4  -2 -11   23.58    2.77
  -4   2  11   25.22    2.83
   4  -2 -10    2.93    1.47
   4  -2 -10    2.24    1.06
   4  -2  -9  345.97    9.60
   4  -2  -9  362.14   12.38
   4  -2  -9  337.88    9.20
   4  -2  -8  104.96    5.09
   4  -2  -8  102.39    6.39
   4  -2  -8   95.83    4.73
   4  -2  -7  126.43    6.79
   4  -2  -7  129.87    5.36
   4  -2  -7  126.75    5.39
   4  -2  -6  255.49    9.17
  -4   2   6  264.50    9.46
   4  -2  -6  254.40    7.35
   4  -2  -6  259.48    7.54
   4  -2  -5    8.95    1.51
  -4   2   5   11.00    2.08
  -4   2   4  548.72   10.75
  -4   2   4  547.62   12.80
   4  -2  -4  522.92   10.67
  -4   2   3   45.56    3.71
   4  -2  -3   42.22    3.53
   4  -2  -3   45.82    3.31
  -4   2   3   51.09    3.43
   4  -2  -2  289.92    7.76
   4  -2  -2  276.74    8.19
  -4   2   2  280.14    8.19
   4  -2  -1  450.80    8.59
   4  -2  -1  455.20   10.94
  -4   2   1  464.59   10.98
   4  -2   0   47.81    3.85
  -4   2   0   53.19    3.95
   4  -2   0   47.10    2.50
   4  -2   1  205.96    4.49
   4  -2   1  202.83    8.10
  -4   2  -1  218.10    8.26
  -4   2  -2   51.99    2.13
   4  -2   2   53.54    3.28
  -4   2  -2   47.95    4.20
   4  -2   3  235.68    6.27
  -4   2  -3  238.56    4.29
  -4   2  -3  251.29    9.79
   4  -2   4   46.81    2.58
  -4   2  -4   56.75    4.93
  -4   2  -4   47.92    2.01
  -4   2  -5   10.14    1.06
  -4   2  -5   10.56    2.33
   4  -2   6  151.89    8.82
  -4   2  -6  169.47    9.21
   4  -2   7    9.46    2.58
   4  -2   8   34.29    4.58
   4  -2   9    7.22    2.55
   4  -2  10   -0.75    2.30
   4  -2  11    6.58    2.89
   4  -2  12    0.07    1.96
   4  -2  13    2.50    2.04
   4  -2  14    6.43    3.31
   4  -2  15    1.02    1.97
   4  -2  16    1.87    2.37
   4  -2  17   -2.15    3.07
  -4   1  20    3.45    2.80
  -4   1  20   -0.86    1.80
  -4   1  19    6.67    2.54
  -4   1  19    3.33    2.40
  -4   1  18   10.89    2.90
  -4   1  18    6.08    2.90
  -4   1  17   -1.23    1.53
  -4   1  17    1.82    2.27
  -4   1  16    2.05    2.03
  -4   1  16    3.99    1.79
  -4   1  15    1.25    1.19
  -4   1  15    0.87    1.56
   4  -1 -15    3.89    1.72
  -4   1  14    7.54    2.50
   4  -1 -14    5.47    1.92
  -4   1  14    3.95    1.80
   4  -1 -13   11.77    2.35
  -4   1  13   11.65    3.05
  -4   1  13   13.82    2.51
   4  -1 -12   46.06    4.23
  -4   1  12   51.65    4.46
   4  -1 -11    6.40    2.04
   4  -1 -11    3.25    1.34
  -4   1  11    5.66    1.70
   4  -1 -10   35.92    3.45
   4  -1 -10   41.28    4.35
  -4   1  10   38.52    3.57
   4  -1  -9  208.49    9.20
   4  -1  -9  199.34    7.68
   4  -1  -8   40.41    3.95
   4  -1  -8   39.96    3.37
   4  -1  -8   39.77    3.48
   4  -1  -7  136.92    6.08
   4  -1  -7  142.12    6.96
   4  -1  -7  143.64    6.09
   4  -1  -6    5.97    1.45
   4  -1  -6    3.62    1.38
   4  -1  -6    4.66    1.17
  -4   1   5  826.06   15.51
   4  -1  -5  849.00   14.73
  -4   1   4  200.75    7.04
  -4   1   4  200.83    7.47
   4  -1  -4  209.67    7.26
  -4   1   3  660.74   13.05
   4  -1  -3  671.73   13.11
  -4   1   3  667.21   13.02
   4  -1  -2  412.11   10.56
  -4   1   2  428.90   10.69
   4  -1  -1   98.80    3.84
   4  -1  -1  101.25    5.43
  -4   1   1   92.92    5.14
   4  -1   0  365.10    5.85
  -4   1   0  367.32   10.66
  -4   1  -1   47.14    3.98
  -4   1  -2   29.91    3.36
  -4   1  -3  341.39   11.54
   4  -1   4    1.11    0.56
  -4   1  -4   -0.37    1.20
  -4   1  -5   -0.07    1.33
  -4   1  -6    7.74    2.32
  -4   1  -6    7.59    1.02
   4  -1   7  117.75    8.07
   4  -1   8   10.69    3.09
   4  -1   9    3.25    2.47
   4  -1  10   -0.58    1.89
   4  -1  11   -1.35    1.94
  -4   1 -12   10.45    2.28
   4  -1  12   16.91    4.05
  -4   1 -13    0.77    1.32
   4  -1  13    1.98    2.45
  -4   1 -14    0.71    1.60
   4  -1  14   -1.51    1.92
   4  -1  15    2.48    2.39
   4  -1  16    4.77    2.78
   4  -1  17   15.85    4.58
   4  -1  18    2.06    2.14
  -4   0  21    7.56    2.67
  -4   0  20    0.42    2.02
  -4   0  20   -0.53    1.96
  -4   0  19    6.29    2.43
  -4   0  19    6.09    2.69
  -4   0  18    0.25    1.33
  -4   0  18    3.79    2.69
  -4   0  17    8.30    2.41
  -4   0  17   13.92    3.63
  -4   0  16    1.84    1.56
  -4   0  16   -0.17    1.71
  -4   0  15    5.06    1.91
  -4   0  15    6.30    2.21
   4   0 -14   11.45    2.59
  -4   0  14   16.34    3.65
  -4   0  14    9.61    2.46
  -4   0  13   49.43    5.47
   4   0 -13   48.75    4.76
  -4   0  13   46.85    4.62
  -4   0  12    2.34    1.34
  -4   0  12    0.64    1.16
   4   0 -12    0.93    1.30
   4   0 -11   27.61    3.66
  -4   0  11   30.11    3.53
   4   0 -11   31.06    3.59
   4   0 -10  132.38    7.50
  -4   0  10  135.86    7.05
   4   0 -10  118.23    6.58
   4   0  -9   14.32    2.42
   4   0  -9   18.17    2.87
   4   0  -8  133.71    6.71
   4   0  -8  142.15    7.06
   4   0  -8  136.65    6.59
   4   0  -7    2.22    1.19
   4   0  -7    1.04    1.00
   4   0  -7    1.01    1.10
   4   0  -6  140.76    6.34
   4   0  -6  146.84    6.46
   4   0  -6  136.30    6.44
   4   0  -5    5.61    1.62
  -4   0   5    5.06    1.47
   4   0  -5    5.27    1.41
  -4   0   4  495.26   11.85
  -4   0   4  480.15   10.89
   4   0  -4  486.86   11.92
  -4   0   3  707.96   12.85
   4   0  -3  713.84   14.43
  -4   0   3  725.54   14.47
   4   0  -2  143.17    6.64
  -4   0   2  147.93    6.71
  -4   0   1  480.87   12.26
  -4   0   0   72.28    4.92
  -4   0  -1  314.39   10.45
  -4   0  -2   19.91    2.88
  -4   0  -3   47.15    4.43
  -4   0  -4  128.74    7.54
   4   0   5    1.44    1.97
  -4   0  -5   -0.39    1.51
  -4   0  -6   91.16    2.67
   4   0   6   96.74    7.15
  -4   0  -6  105.44    7.44
  -4   0  -7  109.71    3.69
   4   0   7  119.35    8.21
   4   0   8   23.27    4.03
  -4   0  -8   25.92    2.17
   4   0   9   46.22    5.57
  -4   0  -9   49.80    3.28
  -4   0 -10    2.11    1.17
   4   0  10   -0.30    1.84
   4   0  11   -0.09    2.03
  -4   0 -11   -0.21    0.91
   4   0  12   40.50    5.68
  -4   0 -12   35.92    3.61
   4   0  13   -0.11    2.13
  -4   0 -13    0.17    1.26
   4   0  14   13.57    3.76
   4   0  15    2.29    2.22
   4   0  16    8.53    3.64
   4   0  17    9.20    3.05
   4   0  18   -3.05    3.09
  -4  -1  21   -4.80    2.49
  -4  -1  20   -0.73    1.95
  -4  -1  19   -0.02    2.31
  -4  -1  19    1.37    2.00
  -4  -1  18    4.12    2.30
  -4  -1  18   -1.18    1.70
  -4  -1  17    2.55    2.01
  -4  -1  17    1.19    1.59
  -4  -1  16    9.07    2.71
  -4  -1  16    7.09    2.54
  -4  -1  15   10.31    2.65
  -4  -1  15    4.41    2.16
  -4  -1  14   56.47    6.04
  -4  -1  14   49.31    5.17
  -4  -1  13   -1.05    1.52
   4   1 -13   -0.46    1.61
  -4  -1  13   -0.59    1.22
   4   1 -12   95.36    6.66
  -4  -1  12   90.78    6.96
  -4  -1  12   96.77    6.70
   4   1 -11   40.97    4.29
  -4  -1  11   37.77    4.32
   4   1 -11   40.67    4.30
  -4  -1  11   33.96    3.98
   4   1 -10   41.20    4.15
  -4  -1  10   35.44    3.89
   4   1 -10   39.01    4.05
   4   1  -9  242.22    9.38
   4   1  -9  265.09    9.94
   4   1  -8   76.51    5.03
   4   1  -8   73.97    5.15
   4   1  -7  496.25   12.01
   4   1  -7  485.33   12.80
   4   1  -6  232.35    7.80
   4   1  -6  239.22    8.81
  -4  -1   5  940.30   15.11
   4   1  -5  979.74   17.51
   4   1  -5  969.62   18.04
  -4  -1   4  464.05   10.13
  -4  -1   4  490.61   12.53
   4   1  -4  459.08   12.33
  -4  -1   3   32.82    3.31
  -4  -1   3   37.23    2.85
  -4  -1   2  555.70   13.59
  -4  -1   1    9.31    1.99
  -4  -1   0  269.72    9.79
   4   1   1  284.10    4.19
  -4  -1  -1  304.52   10.72
  -4  -1  -2   54.78    4.73
  -4  -1  -3  208.95    9.46
   4   1   4    6.85    2.61
  -4  -1  -4    5.42    2.06
   4   1   5   65.58    5.88
  -4  -1  -5   67.10    5.76
  -4  -1  -6   23.42    1.50
   4   1   6   32.87    4.57
  -4  -1  -6   26.86    3.82
  -4  -1  -7    1.18    0.47
   4   1   7    4.67    2.62
  -4  -1  -8   57.89    3.14
   4   1   8   61.83    6.23
  -4  -1  -9   11.88    1.67
   4   1   9   10.04    2.96
  -4  -1 -10   11.11    1.90
   4   1  10   12.90    3.44
  -4  -1 -11    0.27    0.92
   4   1  11   -0.25    2.12
  -4  -1 -12    0.90    1.12
   4   1  12   -0.29    1.67
  -4  -1 -13    5.03    1.83
   4   1  13    0.35    1.76
   4   1  14    2.34    2.48
   4   1  15    7.88    3.12
   4   1  16    5.88    2.85
   4   1  17    5.32    3.10
   4   1  18    8.48    3.65
  -4  -2  22    1.10    2.32
  -4  -2  21    4.79    2.80
  -4  -2  20   -1.07    1.79
  -4  -2  19   -2.13    2.05
  -4  -2  18    2.19    2.15
  -4  -2  18    1.37    1.97
  -4  -2  17    1.16    1.66
  -4  -2  17   -0.07    2.24
  -4  -2  16   10.28    2.90
  -4  -2  16   11.58    3.24
  -4  -2  15    0.93    1.41
  -4  -2  15    3.83    2.37
  -4  -2  14    2.50    2.03
  -4  -2  14    2.51    1.88
  -4  -2  13  121.05    8.19
  -4  -2  13  121.64    8.04
  -4  -2  12   36.68    4.43
  -4  -2  12   39.59    4.58
   4   2 -11   88.65    6.51
  -4  -2  11   66.98    5.59
  -4  -2  11   78.87    6.14
  -4  -2  10  126.71    7.24
   4   2 -10  144.18    7.44
  -4  -2  10  141.99    7.98
   4   2 -10  134.46    7.77
   4   2  -9    0.61    1.01
   4   2  -9    0.70    0.87
  -4  -2   9   -0.28    1.43
   4   2  -8   74.02    4.81
   4   2  -8   74.16    5.41
   4   2  -7   49.36    3.70
   4   2  -7   50.94    4.45
   4   2  -6    1.51    1.17
   4   2  -6    1.14    0.84
   4   2  -5  561.97   14.06
  -4  -2   4   25.68    3.08
  -4  -2   4   24.30    2.23
   4   2  -4   25.49    3.03
  -4  -2   3  692.55   15.78
  -4  -2   3  662.31   11.06
  -4  -2   2   33.25    3.54
  -4  -2   1  621.99   15.26
  -4  -2   0   92.38    6.03
   4   2   1   29.11    1.82
  -4  -2  -1   28.30    3.45
   4   2   2  144.13    3.77
  -4  -2  -2  151.32    8.06
  -4  -2  -3   29.16    3.83
   4   2   3   27.00    3.61
   4   2   4  244.12   10.88
  -4  -2  -4  248.99   10.97
  -4  -2  -5    6.37    2.28
   4   2   5    4.09    2.12
  -4  -2  -6  184.40    4.89
  -4  -2  -6  188.38    9.00
   4   2   6  169.09    3.57
   4   2   6  172.69    9.87
  -4  -2  -7   55.99    3.00
  -4  -2  -7   53.56    5.15
   4   2   7   51.13    5.69
   4   2   7   52.00    5.61
  -4  -2  -8    3.99    1.12
   4   2   8    6.34    2.68
  -4  -2  -9    0.21    0.77
   4   2   9    1.49    2.20
   4   2  10   30.44    4.77
  -4  -2 -10   26.02    2.66
  -4  -2 -11   -1.16    1.05
   4   2  11    2.57    2.51
  -4  -2 -12    5.86    1.66
   4   2  12    2.18    2.31
   4   2  13   -0.39    2.09
  -4  -2 -13    0.98    1.31
   4   2  14    0.80    2.07
   4   2  15   10.05    3.48
   4   2  16    4.38    2.92
   4   2  17   15.38    4.38
   4   2  18    3.10    2.54
  -4  -3  22   -0.02    2.12
  -4  -3  21    2.45    2.64
  -4  -3  20    1.01    2.34
  -4  -3  19    2.21    2.12
  -4  -3  18    0.75    1.50
  -4  -3  17    1.15    1.72
  -4  -3  16   26.45    4.41
  -4  -3  16   23.49    4.13
  -4  -3  15   10.77    3.09
  -4  -3  15    9.70    2.81
  -4  -3  14   47.58    5.47
  -4  -3  14   39.66    5.10
  -4  -3  13   -1.60    1.76
  -4  -3  13   -0.69    1.40
  -4  -3  12   35.72    4.25
  -4  -3  12   45.57    5.05
  -4  -3  11   70.16    5.55
  -4  -3  11   82.74    6.56
  -4  -3  10    4.89    1.62
   4   3 -10    6.47    2.06
   4   3 -10    5.44    1.67
  -4  -3  10    5.41    2.04
  -4  -3   9  331.90   10.66
   4   3  -9  332.50   10.30
  -4  -3   9  336.09   12.55
   4   3  -9  330.90   12.34
   4   3  -8  337.03    9.73
   4   3  -8  332.77   12.37
   4   3  -8  341.39   12.23
   4   3  -7  954.28   20.54
   4   3  -7  959.05   15.36
   4   3  -7  987.52   20.21
   4   3  -6  168.87    6.00
   4   3  -6  171.49    8.39
   4   3  -5  202.55    8.89
   4   3  -4  532.67   14.21
  -4  -3   3   54.56    4.78
  -4  -3   3   48.84    2.77
  -4  -3   2   74.89    5.57
  -4  -3   1   94.90    6.25
   4   3   0  142.10    5.17
  -4  -3   0  144.63    7.86
   4   3   1   74.39    3.58
   4   3   1   75.83    5.89
  -4  -3  -1   83.95    6.14
  -4  -3  -2    0.32    1.32
   4   3   2    1.56    0.70
   4   3   2    1.76    1.66
   4   3   3  162.44    5.08
   4   3   3  154.00    8.64
  -4  -3  -3  147.88    8.47
  -4  -3  -4    2.15    1.42
   4   3   4    0.76    1.72
  -4  -3  -5    3.73    1.80
   4   3   5    8.28    2.75
  -4  -3  -6   24.48    2.12
  -4  -3  -6   28.24    3.52
   4   3   6   27.00    1.99
   4   3   6   31.19    4.52
  -4  -3  -7   10.39    1.57
   4   3   7   10.72    1.08
  -4  -3  -7   10.49    2.46
   4   3   7    9.39    2.89
   4   3   8   -1.16    1.85
  -4  -3  -8    0.06    0.66
  -4  -3  -9    9.97    1.70
   4   3   9   10.24    2.97
   4   3  10   -2.92    2.46
  -4  -3 -10   -0.35    0.77
   4   3  11    7.25    2.96
  -4  -3 -11    9.48    1.85
  -4  -3 -12    7.51    1.91
   4   3  12    1.90    1.80
   4   3  13   -2.28    2.78
   4   3  14    5.85    2.88
   4   3  15    3.80    3.10
   4   3  16    5.08    2.55
   4   3  17   -1.10    2.18
  -4  -4  22    0.46    2.39
  -4  -4  21    6.48    3.12
  -4  -4  20   -2.39    1.82
  -4  -4  19    1.73    1.69
  -4  -4  18   -4.48    2.49
  -4  -4  17    2.55    2.15
  -4  -4  16   -2.50    2.16
  -4  -4  15   -0.31    1.67
  -4  -4  14    6.61    2.42
  -4  -4  14   12.57    3.11
  -4  -4  13   45.69    5.51
  -4  -4  13   43.21    4.84
  -4  -4  12   55.48    5.12
  -4  -4  12   55.78    5.86
  -4  -4  11   19.63    2.98
  -4  -4  11   29.42    4.31
  -4  -4  10  165.65    7.74
   4   4 -10  177.03    7.83
  -4  -4  10  189.43   10.10
   4   4  -9   23.77    3.70
  -4  -4   9   20.06    2.62
   4   4  -9   29.45    3.04
  -4  -4   9   26.58    3.95
   4   4  -8   73.25    6.16
  -4  -4   8   78.47    4.66
   4   4  -8   71.46    4.34
   4   4  -8   76.71    6.11
   4   4  -7   67.03    5.84
  -4  -4   7   68.60    4.03
   4   4  -7   67.94    3.89
   4   4  -7   65.55    5.49
   4   4  -6   88.25    6.32
   4   4  -5  486.16   14.44
   4   4  -4  114.59    6.97
  -4  -4   3  189.36    9.16
  -4  -4   3  180.50    4.61
   4   4  -3  201.63    9.16
  -4  -4   2  114.59    7.19
  -4  -4   2  109.30    3.62
  -4  -4   1   56.47    5.08
   4   4  -1   66.22    5.64
   4   4   0  284.91    8.29
   4   4   0  288.28   11.61
  -4  -4   0  297.67   11.69
  -4  -4  -1    4.66    1.65
   4   4   1    4.63    1.04
   4   4   1    6.09    2.32
   4   4   2   60.85    3.66
  -4  -4  -2   57.13    3.76
   4   4   2   60.02    5.54
  -4  -4  -2   60.27    5.47
   4   4   3    2.27    1.06
  -4  -4  -3    0.58    1.23
  -4  -4  -3    0.21    0.83
   4   4   3    0.69    1.54
   4   4   4   19.61    2.30
  -4  -4  -4   18.73    3.27
   4   4   4   17.67    3.38
   4   4   5    5.68    2.19
  -4  -4  -6   56.88    4.95
   4   4   6   46.51    5.49
  -4  -4  -7    4.31    1.24
  -4  -4  -7    6.14    1.88
   4   4   7    7.60    1.26
   4   4   7    5.58    2.58
  -4  -4  -8    0.38    0.75
   4   4   8    2.38    2.52
  -4  -4  -9    5.72    1.35
   4   4   9   10.75    3.07
  -4  -4 -10   36.09    3.46
   4   4  10   26.60    4.50
  -4  -4 -11   10.57    2.01
   4   4  11    9.09    3.16
  -4  -4 -12    3.71    1.59
   4   4  12    0.12    1.86
   4   4  13   -0.75    2.33
   4   4  14   -2.27    2.51
   4   4  15   29.47    5.43
   4   4  16   -1.39    2.17
   4   4  17   21.95    4.92
  -4  -5  21    1.87    2.84
  -4  -5  20    2.35    2.35
  -4  -5  19    0.45    2.20
  -4  -5  18    3.20    2.45
  -4  -5  17    3.63    2.11
  -4  -5  16   18.65    4.02
  -4  -5  15    2.58    2.15
  -4  -5  14   34.11    4.98
  -4  -5  13   94.50    8.06
  -4  -5  12   42.39    5.36
  -4  -5  11   83.77    5.77
  -4  -5  11   88.31    7.43
  -4  -5  10    2.40    1.43
   4   5 -10    1.69    1.11
  -4  -5  10    2.73    1.77
   4   5  -9  210.55   11.04
  -4  -5   9  203.81    7.72
   4   5  -9  215.23    7.70
   4   5  -8   24.52    3.81
  -4  -5   8   25.18    2.54
   4   5  -8   26.75    2.55
   4   5  -7  107.34    7.63
  -4  -5   7  103.02    4.56
   4   5  -7  112.85    4.67
   4   5  -6  340.19   13.36
  -4  -5   6  324.18    7.08
   4   5  -6  342.61   12.85
   4   5  -5   25.97    3.58
   4   5  -5   22.06    3.56
  -4  -5   5   23.34    1.68
  -4  -5   4  182.04    3.88
   4   5  -4  198.74    9.60
   4   5  -4  198.29   10.07
   4   5  -3  141.78    7.99
   4   5  -3  128.31    8.05
  -4  -5   2  155.53    8.76
  -4  -5   2  150.22    3.33
   4   5  -2  167.56    8.74
   4   5  -2  168.76    9.20
  -4  -5   1  441.04   14.62
   4   5  -1  429.62   11.57
  -4  -5   1  422.89    6.64
   4   5  -1  420.54   14.48
   4   5   0    2.47    1.74
  -4  -5   0    1.72    1.05
   4   5   0    3.40    1.22
  -4  -5   0    1.70    0.57
   4   5   1  135.70    6.19
  -4  -5  -1  144.61    5.11
   4   5   1  152.15    8.88
  -4  -5  -1  147.08    8.68
   4   5   2   71.16    4.50
  -4  -5  -2   65.76    3.89
   4   5   2   58.62    5.67
  -4  -5  -2   65.16    5.96
   4   5   3    6.08    1.60
  -4  -5  -3    5.69    1.32
   4   5   3    5.78    2.14
   4   5   4    8.36    1.78
  -4  -5  -4    5.83    1.46
   4   5   4    3.52    2.06
   4   5   5    3.98    1.64
   4   5   5    3.44    2.04
  -4  -5  -6   -0.55    1.09
   4   5   6    2.96    1.98
  -4  -5  -7   61.32    4.41
  -4  -5  -7   56.86    5.24
   4   5   7   57.78    3.74
   4   5   7   64.78    6.61
  -4  -5  -8    1.30    1.05
   4   5   8    0.91    1.01
  -4  -5  -9    1.35    1.19
   4   5   9    4.73    2.36
   4   5  10   13.81    3.50
  -4  -5 -10    7.53    1.81
  -4  -5 -11    1.44    1.21
   4   5  11    1.59    2.05
   4   5  12    4.74    2.51
   4   5  13   10.36    3.34
   4   5  14   10.44    3.35
   4   5  15    2.63    2.32
  -4  -6  20   -1.75    2.86
  -4  -6  19    6.19    3.08
  -4  -6  18   -3.63    2.52
  -4  -6  17    3.14    2.18
  -4  -6  16    3.89    2.12
  -4  -6  15   12.44    3.31
  -4  -6  14   51.96    6.47
  -4  -6  13   13.85    3.39
  -4  -6  12   55.63    6.29
   4   6 -11   -0.41    0.89
  -4  -6  11    1.11    1.94
   4   6 -10  156.69   10.19
   4   6 -10  151.64    6.78
  -4  -6  10  146.45    9.66
   4   6  -9   78.33    7.10
   4   6  -9   73.47    4.32
   4   6  -8    6.40    2.32
   4   6  -8    8.52    1.42
   4   6  -7  116.01    8.26
   4   6  -6    6.15    2.24
   4   6  -5  133.33    8.59
   4   6  -4  113.03    7.95
   4   6  -3  148.17    9.00
   4   6  -2  228.40   10.65
   4   6  -2  211.98   10.76
   4   6  -1    9.08    2.71
   4   6  -1    9.26    2.23
   4   6   0   81.26    6.73
   4   6   1   45.95    5.24
   4   6   2   95.54    7.45
   4   6   3   17.57    3.47
   4   6   4    1.20    1.64
   4   6   5  120.47    8.73
   4   6   6   46.06    5.73
   4   6   7   17.37    2.48
   4   6   7   20.00    4.09
  -4  -6  -8   -0.53    1.02
   4   6   8    1.09    1.15
   4   6   8    2.13    2.29
  -4  -6  -9    3.49    1.48
   4   6   9    1.80    2.03
   4   6   9    4.78    2.46
  -4  -6 -10    3.15    1.31
   4   6  10    5.99    2.82
   4   6  11    1.26    2.10
   4   6  12    4.72    2.77
   4   6  13   14.58    3.93
   4   6  14    1.31    2.49
  -4  -7  19    1.20    1.95
  -4  -7  18    5.05    2.66
  -4  -7  17    1.10    2.35
  -4  -7  16    4.95    2.64
  -4  -7  15    5.72    2.74
  -4  -7  14    6.03    2.85
  -4  -7  13   70.36    7.53
  -4  -7  12   -0.13    1.46
   4   7 -11  122.55    9.51
   4   7 -11  130.41    6.55
  -4  -7  11  133.99    9.82
   4   7 -10   49.96    6.08
   4   7 -10   41.20    3.37
   4   7  -9   13.93    3.27
   4   7  -9   12.72    1.77
   4   7  -8   51.98    6.02
   4   7  -8   65.05    3.27
   4   7  -7    3.92    1.99
   4   7  -6  132.67    9.15
   4   7  -5   23.35    4.04
   4   7  -4   42.30    5.23
   4   7  -3  112.12    7.24
   4   7  -3  122.94    8.54
   4   7  -2   -0.98    1.47
   4   7  -2    3.60    1.34
   4   7  -1  373.50   12.55
   4   7  -1  363.57   14.52
   4   7   0    7.26    2.50
   4   7   0    1.93    1.17
   4   7   1   66.42    5.25
   4   7   1   85.58    7.26
   4   7   2    6.91    1.85
   4   7   2   11.70    2.80
   4   7   3    7.31    1.94
   4   7   3   11.93    2.88
   4   7   4    2.64    1.52
   4   7   4    4.16    2.01
   4   7   5   -1.57    1.52
   4   7   5   -0.09    1.76
   4   7   6   11.57    2.77
   4   7   6    7.46    2.90
   4   7   7    6.45    2.93
   4   7   8    0.89    1.85
   4   7   9   -1.73    1.85
   4   7  10    1.46    2.38
  -4  -7 -10    0.69    1.31
   4   7  11    0.10    2.06
   4   7  12    2.34    2.49
   4   7  13    5.68    2.55
  -4  -8  18    3.30    2.34
  -4  -8  17    2.86    2.50
  -4  -8  16   -5.67    2.95
  -4  -8  15   14.95    3.96
  -4  -8  14   36.57    5.71
  -4  -8  13    1.68    1.72
   4   8 -12   31.68    5.41
  -4  -8  12   35.67    5.60
   4   8 -11   60.15    7.02
  -4  -8  11   55.62    6.62
   4   8 -10   49.15    6.17
   4   8 -10   50.23    3.45
   4   8  -9   51.83    6.30
   4   8  -9   54.44    3.09
   4   8  -8    5.97    2.30
   4   8  -7  139.88    9.93
   4   8  -6   10.13    2.88
   4   8  -5   79.59    7.37
   4   8  -4   90.64    7.76
   4   8  -3   45.03    5.63
   4   8  -2   76.57    7.13
   4   8  -1   13.42    3.33
   4   8  -1   12.72    2.73
   4   8   0    5.94    2.81
   4   8   0    0.63    1.16
   4   8   1    1.56    1.73
   4   8   1    0.20    1.53
   4   8   2    1.76    1.39
   4   8   2    4.35    2.33
   4   8   3   12.39    2.65
   4   8   3   10.43    2.94
   4   8   4    1.50    1.22
   4   8   4    0.20    1.64
   4   8   5   21.79    3.44
   4   8   5   21.04    4.15
   4   8   6    2.83    1.89
   4   8   6    1.92    2.01
   4   8   7   -0.18    1.24
   4   8   7    1.27    1.95
   4   8   8    1.49    1.17
   4   8   8    1.67    2.15
   4   8   9    1.81    1.87
   4   8  10    3.28    2.12
   4   8  11    7.94    2.78
   4   8  12    4.59    2.83
  -4  -9  17   -2.59    2.60
  -4  -9  16    6.13    3.04
  -4  -9  15   12.90    4.17
  -4  -9  14   -0.46    1.95
   4   9 -13   35.88    5.96
  -4  -9  13   36.08    5.84
   4   9 -12    9.29    3.15
  -4  -9  12   15.07    4.00
   4   9 -11   41.87    6.18
   4   9 -10   90.51    8.73
   4   9  -9    8.84    3.02
   4   9  -8   72.64    7.53
   4   9  -7   25.41    4.61
   4   9  -6   81.33    7.89
   4   9  -5   13.34    3.48
   4   9  -4    4.92    2.67
   4   9  -3   57.61    6.40
   4   9  -2    5.92    2.39
   4   9  -1    0.50    2.01
   4   9   0   19.37    3.86
   4   9   1    1.99    2.08
   4   9   2   13.09    3.51
   4   9   3    4.18    2.28
   4   9   4   -2.55    2.57
   4   9   5    1.80    2.11
   4   9   6    2.81    1.61
   4   9   6    0.21    1.83
   4   9   7    1.16    1.53
   4   9   7    1.33    1.87
   4   9   8   -0.66    1.94
   4   9   9   -5.16    2.96
   4   9  10    6.41    2.81
  -4 -10  16    8.20    3.66
   4  10 -15   20.83    4.87
  -4 -10  15   11.48    3.78
   4  10 -14   15.93    4.36
  -4 -10  14   10.75    3.48
   4  10 -13    2.24    2.35
   4  10 -12   19.02    4.39
   4  10 -11   46.23    6.68
   4  10 -10    6.17    2.99
   4  10  -9   48.79    6.51
   4  10  -8    7.44    2.91
   4  10  -7   59.31    7.04
   4  10  -6   49.94    6.36
   4  10  -5   16.33    3.80
   4  10  -4   61.07    6.90
   4  10  -3    9.83    2.93
   4  10  -2   12.09    3.41
   4  10  -1   16.60    3.72
   4  10   0   -2.18    2.35
   4  10   1    1.90    2.06
   4  10   2    0.91    1.49
   4  10   3    3.60    2.57
   4  10   4   -3.98    2.56
   4  10   5    3.04    1.76
   4  10   5    2.14    1.90
   4  10   6   -2.44    1.84
   4  10   6    5.29    2.84
   4  10   7    0.73    1.45
   4  10   7    0.19    2.47
   4  10   8    6.83    3.14
   4  10   9   -5.17    2.78
   4  11 -14    0.99    2.05
   4  11 -13    8.99    3.75
   4  11 -12    5.55    2.94
   4  11 -11   12.88    3.79
   4  11 -10   50.04    7.10
   4  11  -9    3.86    2.20
   4  11  -8   26.83    5.14
   4  11  -7   10.76    3.32
   4  11  -6    3.57    1.85
   4  11  -5   49.10    6.59
   4  11  -4   10.03    3.21
   4  11  -3   13.06    3.76
   4  11  -2   59.14    7.16
   4  11  -1    2.98    2.37
   4  11   0    5.45    2.64
   4  11   1   -0.10    1.75
   4  11   2   10.20    3.38
   4  11   3    5.90    3.20
   4  11   4   -0.30    1.72
   4  11   5   -0.68    2.03
   4  11   5   -0.68    2.20
   4  11   6   -4.12    2.19
   4  11   6   -1.06    2.45
   4  11   7    2.52    1.73
   4  11   8    5.96    3.19
   4  11   9    2.49    2.25
   4  12 -13   -2.15    2.55
   4  12 -12   26.97    5.81
   4  12 -11   32.75    6.04
   4  12 -10   -3.11    2.66
   4  12  -9   10.19    3.54
   4  12  -8    2.71    2.69
   4  12  -7   20.96    4.82
   4  12  -6   20.45    4.61
   4  12  -5    4.06    2.57
   4  12  -4   27.66    5.23
   4  12  -3    7.55    2.94
   4  12  -2    1.27    2.13
   4  12  -1   11.42    3.67
   4  12   0    3.68    2.14
   4  12   1    4.62    2.75
   4  12   2    2.46    2.19
   4  12   3   -2.34    2.77
   4  12   4    0.94    1.83
   4  12   4    6.13    2.81
   4  12   5   -0.73    1.76
   4  12   5   -0.97    1.92
   4  12   6    4.36    3.02
   4  12   7    0.50    2.11
   4  13 -11    2.47    2.49
   4  13 -10    8.64    3.61
   4  13  -9    6.49    3.39
   4  13  -8    2.56    1.95
   4  13  -7   27.26    5.57
   4  13  -6    2.02    2.22
   4  13  -5    7.59    2.79
   4  13  -4    5.53    2.20
   4  13  -3   -5.84    3.09
   4  13  -2   -0.31    1.83
   4  13  -1    1.68    2.27
   4  13   0    6.18    3.24
   4  13   1    1.00    2.16
   4  13   2    1.09    2.63
   4  13   3    6.10    2.96
   4  13   4    1.12    2.05
   4  13   4    1.28    2.07
   4  13   5   -1.06    2.07
   4  13   5   -0.37    2.10
   4  14  -8   -3.04    2.65
   4  14  -7    4.44    3.11
   4  14  -6    3.06    2.69
   4  14  -5    1.84    2.39
   4  14  -4   -2.67    2.38
   4  14  -3    5.35    2.94
   4  14  -2    0.81    2.13
   4  14  -1   -1.89    2.12
   4  14   0    4.45    2.89
   4  14   1   -0.29    2.20
   4  14   2   -0.97    2.42
   4  14   3    2.87    2.16
   4  14   3    3.89    3.12
   4  14   4    2.91    2.33
   4  15  -5    7.54    3.39
   4  15  -4    5.23    3.47
   4  15  -3    7.56    3.36
   4  15  -2   -3.15    2.74
   4  15  -1   -1.25    2.13
   4  15   0    6.53    3.34
   4  15   1    4.74    2.75
  -5  16   2   -1.93    1.88
  -5  16   1   26.10    6.12
  -5  16   1   10.26    2.94
  -5  16   0    0.32    2.67
  -5  16   0    7.69    2.75
  -5  16  -1   10.23    4.13
  -5  16  -1    5.21    2.20
  -5  16  -2    9.87    3.54
  -5  16  -2    5.18    2.34
  -5  16  -3    3.46    3.30
  -5  16  -3    1.21    1.71
   5 -16   4    6.29    2.48
  -5  16  -4   11.70    3.49
   5 -16   5   -0.65    1.95
  -5  16  -5    2.36    2.88
   5 -16   6   -0.17    2.57
  -5  16  -6    3.61    2.90
   5 -16   7   -0.25    1.63
  -5  16  -7    4.61    3.16
   5 -16   8    0.69    1.75
   5 -15  -7   11.50    4.24
   5 -15  -6   -0.82    3.00
   5 -15  -5   29.63    5.73
   5 -15  -4    5.20    2.96
  -5  15   3   12.67    3.31
  -5  15   2   15.26    3.63
  -5  15   1    5.37    3.77
  -5  15   1   -2.34    2.05
  -5  15   0   28.81    5.68
  -5  15   0   22.98    4.23
  -5  15  -1    2.56    2.52
  -5  15  -1    1.91    1.79
   5 -15   2    3.18    1.84
  -5  15  -2    6.81    2.99
  -5  15  -2    1.81    1.77
   5 -15   3   17.91    3.69
  -5  15  -3   18.66    4.87
  -5  15  -4   -1.62    2.63
   5 -15   4    1.72    1.80
  -5  15  -5   17.52    4.97
   5 -15   5    9.30    2.99
   5 -15   6    0.42    1.90
  -5  15  -6    2.99    2.86
   5 -15   7    6.63    2.79
  -5  15  -7    6.14    3.38
   5 -15   8   -2.27    2.31
  -5  15  -8   -0.04    2.42
   5 -15   9   -1.29    1.90
  -5  15  -9    3.22    2.86
  -5  15 -10    4.65    2.92
   5 -14 -10    0.42    2.51
   5 -14  -9    1.90    2.25
   5 -14  -8   28.79    5.81
   5 -14  -7   -1.77    2.39
   5 -14  -6   52.61    7.35
   5 -14  -5    9.01    3.53
   5 -14  -4   17.71    4.28
  -5  14   4   12.20    3.24
   5 -14  -3   25.62    5.16
  -5  14   3   22.83    4.23
  -5  14   2    2.62    1.76
   5 -14  -1   10.85    2.27
  -5  14   1   12.18    4.13
  -5  14   1   16.13    3.64
   5 -14   0    1.94    1.58
  -5  14   0   -0.37    2.32
  -5  14   0   -0.41    1.78
  -5  14  -1   45.68    6.87
  -5  14  -1   42.33    5.76
   5 -14   1   48.20    5.13
   5 -14   2   28.93    4.29
  -5  14  -2   32.40    5.66
   5 -14   3    0.54    1.41
  -5  14  -3    2.23    2.73
   5 -14   4   -1.22    1.63
  -5  14  -4    2.83    2.25
   5 -14   5    2.51    2.06
  -5  14  -5    4.79    3.17
  -5  14  -6   -1.20    2.01
   5 -14   6    0.16    1.61
  -5  14  -7   -0.44    2.31
   5 -14   7   -5.28    2.58
  -5  14  -8   -1.19    2.86
   5 -14   8   -0.86    1.97
  -5  14  -9    7.82    3.14
   5 -14   9    5.80    3.13
  -5  14 -10    1.22    2.28
   5 -14  10    0.22    2.28
  -5  14 -11    2.24    2.23
   5 -13 -11    3.45    2.40
   5 -13 -10    2.79    2.51
   5 -13  -9   16.08    4.48
   5 -13  -8    6.16    3.19
   5 -13  -7   24.08    5.19
   5 -13  -6   13.49    4.10
   5 -13  -5   14.49    4.23
  -5  13   5   13.26    3.45
   5 -13  -4   14.74    3.82
  -5  13   4   15.47    3.65
   5 -13  -3   -0.15    2.29
  -5  13   3   -0.58    2.05
   5 -13  -2   17.94    4.13
  -5  13   2   20.80    3.93
   5 -13  -1    0.57    0.90
  -5  13   1    2.96    1.88
   5 -13   0   25.79    3.49
  -5  13   0   33.32    4.73
   5 -13   1   23.31    3.39
  -5  13  -1   20.83    4.70
  -5  13  -2    8.14    3.22
   5 -13   2    2.36    1.76
  -5  13  -3    5.13    2.64
   5 -13   3    7.28    2.22
  -5  13  -4    7.24    3.52
   5 -13   4    2.23    1.94
  -5  13  -5   18.90    4.47
   5 -13   5   11.90    3.06
  -5  13  -6    5.39    2.70
   5 -13   6    0.28    1.58
  -5  13  -7   -0.66    2.19
   5 -13   7    3.85    2.33
  -5  13  -8    0.65    1.90
   5 -13   8   -0.73    1.82
  -5  13  -9    0.66    2.07
   5 -13   9    1.17    2.13
  -5  13 -10    5.23    2.79
   5 -13  10    3.67    2.76
  -5  13 -11    3.25    2.37
   5 -13  11    1.11    2.28
   5 -12 -13    0.72    3.10
   5 -12 -12    3.86    3.01
   5 -12 -11   33.91    6.17
   5 -12 -10   23.92    5.22
   5 -12  -9   14.32    4.09
   5 -12  -8   53.78    7.06
   5 -12  -7    5.74    3.16
   5 -12  -6   22.06    4.53
   5 -12  -5   32.79    5.42
  -5  12   5   24.72    4.22
   5 -12  -4    7.94    2.92
  -5  12   4    5.25    2.27
   5 -12  -4    4.76    0.96
  -5  12   3   14.41    1.55
   5 -12  -3   16.84    2.08
   5 -12  -3   17.22    3.87
  -5  12   3   16.76    3.44
   5 -12  -2    5.02    2.01
  -5  12   2    5.04    1.25
   5 -12  -1    9.83    2.92
  -5  12   1   13.43    3.77
  -5  12   1   11.39    3.09
  -5  12   1   12.27    2.12
  -5  12   0    0.77    1.73
   5 -12   0    0.06    1.22
  -5  12   0   -2.02    1.33
  -5  12  -1   16.30    3.88
   5 -12   1    7.43    2.11
  -5  12  -2   22.94    4.67
   5 -12   2   24.81    3.81
  -5  12  -3    1.67    2.42
   5 -12   3    2.31    1.70
  -5  12  -4    3.00    2.45
   5 -12   4   -0.43    1.53
  -5  12  -5   -0.27    2.21
   5 -12   5   -1.61    1.84
  -5  12  -6    0.21    1.71
   5 -12   6    1.29    1.79
  -5  12  -7    1.13    1.88
   5 -12   7    2.09    1.77
  -5  12  -8    2.22    2.10
   5 -12   8    1.98    1.85
  -5  12  -9    3.40    2.36
   5 -12   9    1.15    1.60
  -5  12 -10    1.38    2.14
   5 -12  10   -0.80    2.18
  -5  12 -11    6.91    2.91
   5 -12  11    0.91    2.34
   5 -12  12    3.58    2.24
   5 -11 -14    7.04    2.98
   5 -11 -13    1.96    2.45
   5 -11 -12   25.52    5.17
   5 -11 -11   60.63    7.86
   5 -11 -10    5.15    2.87
   5 -11  -9   79.70    8.43
   5 -11  -8    5.48    2.41
   5 -11  -7   67.12    7.43
   5 -11  -6   11.33    3.54
  -5  11   6    6.69    2.49
   5 -11  -5    0.04    1.43
  -5  11   5    1.33    1.46
   5 -11  -4  150.61   10.43
  -5  11   4  155.86    9.82
   5 -11  -4  160.41    5.20
   5 -11  -3    0.98    1.36
   5 -11  -3    0.69    0.76
  -5  11   3    0.39    1.46
  -5  11   3    0.05    0.52
   5 -11  -2    3.34    2.02
  -5  11   2    4.64    2.13
  -5  11   2    6.37    1.41
  -5  11   1   24.37    3.95
   5 -11  -1   20.31    3.67
  -5  11   1   24.77    2.89
  -5  11   0   15.18    4.00
  -5  11   0   15.80    2.69
   5 -11   0   12.15    2.32
   5 -11   1   58.60    5.24
  -5  11  -1   64.14    6.95
  -5  11  -1   61.85    5.18
  -5  11  -2   23.37    4.38
   5 -11   2   24.74    3.74
  -5  11  -3    3.58    2.21
   5 -11   3    5.88    2.16
  -5  11  -4   10.39    3.07
   5 -11   4    9.58    2.78
  -5  11  -5   11.28    3.19
   5 -11   5    5.95    2.43
  -5  11  -6   12.99    3.48
   5 -11   6    9.16    2.83
  -5  11  -7   10.32    3.31
   5 -11   7   10.40    3.17
  -5  11  -8   -0.51    1.78
   5 -11   8    1.30    1.79
  -5  11  -9    4.22    2.04
   5 -11   9    8.36    3.35
  -5  11 -10    2.00    2.01
   5 -11  10   -2.25    2.63
  -5  11 -11   18.27    3.77
   5 -11  11   24.74    5.06
   5 -11  12   -1.73    2.31
  -5  10  16    0.06    2.44
   5 -10 -15   22.85    5.04
   5 -10 -14   -5.94    3.07
   5 -10 -13   33.18    5.96
   5 -10 -12   10.55    3.74
   5 -10 -11   17.21    4.43
   5 -10 -10   79.05    8.20
   5 -10  -9   -2.88    2.46
   5 -10  -8   48.61    6.26
   5 -10  -7   89.45    8.23
   5 -10  -6   88.18    7.98
  -5  10   6   87.03    7.44
   5 -10  -5    6.15    2.67
  -5  10   5    3.99    1.75
   5 -10  -5    7.72    0.83
   5 -10  -4    1.59    1.94
   5 -10  -4    0.82    0.59
  -5  10   4    0.86    1.66
   5 -10  -3   14.70    3.25
  -5  10   3   22.60    3.83
   5 -10  -3   15.45    1.99
  -5  10   3   16.71    1.72
   5 -10  -2   11.46    2.97
  -5  10   2    7.75    2.49
   5 -10  -2    7.42    1.65
  -5  10   2    7.57    1.60
   5 -10  -1    5.95    1.89
  -5  10   1   11.20    2.01
   5 -10   0   49.89    5.49
  -5  10   0   61.21    4.72
   5 -10   1    1.70    1.33
  -5  10  -1    4.68    2.42
  -5  10  -1    4.50    1.92
   5 -10   2   10.79    2.42
  -5  10  -2   19.58    3.92
  -5  10  -2   13.46    2.71
   5 -10   3    3.74    2.14
  -5  10  -3    5.10    2.49
  -5  10  -3    6.76    2.35
   5 -10   4    0.27    1.47
  -5  10  -4    1.07    1.99
   5 -10   5    3.27    1.91
  -5  10  -5    0.02    1.63
  -5  10  -6    1.46    1.87
   5 -10   6   -1.81    1.92
   5 -10   7    6.65    2.49
  -5  10  -7    4.22    2.37
   5 -10   8   25.16    4.64
  -5  10  -8   20.11    3.77
  -5  10  -9    7.48    2.65
   5 -10   9    5.51    2.62
  -5  10 -10   32.76    4.55
   5 -10  10   24.54    4.87
   5 -10  11    0.65    2.11
  -5  10 -11   -0.65    1.61
   5 -10  12   10.39    3.59
   5 -10  13    7.82    3.57
  -5   9  17    4.08    2.96
   5  -9 -16   12.93    4.14
  -5   9  16    8.75    3.30
   5  -9 -15   -2.26    2.74
   5  -9 -14    5.13    3.20
   5  -9 -13   12.21    3.92
   5  -9 -12   41.07    6.27
   5  -9 -11   73.36    7.98
   5  -9 -10    7.84    2.95
   5  -9  -9   87.85    8.36
   5  -9  -8   30.02    4.81
   5  -9  -7   12.41    3.31
   5  -9  -6  126.60    9.04
  -5   9   6  131.67    8.84
   5  -9  -5    2.04    0.64
  -5   9   5   -0.61    1.71
   5  -9  -4  229.67   11.70
   5  -9  -4  252.12    6.70
  -5   9   4  235.97   11.49
  -5   9   4  235.73    4.63
   5  -9  -3    2.37    1.74
  -5   9   3    2.15    1.56
  -5   9   3    0.55    0.65
   5  -9  -3    0.96    0.84
   5  -9  -2   38.92    4.67
   5  -9  -2   37.07    3.31
  -5   9   2   33.64    4.32
  -5   9   2   31.86    2.78
   5  -9  -1    1.29    1.72
  -5   9   1    0.84    0.93
   5  -9   0    4.75    1.85
  -5   9   0   11.07    2.72
  -5   9   0    7.77    1.86
  -5   9  -1   26.28    3.97
   5  -9   1   24.75    3.40
  -5   9  -1   24.14    3.16
  -5   9  -2   11.54    2.49
   5  -9   2   12.35    2.62
  -5   9  -2   19.84    3.91
  -5   9  -2   13.90    2.87
  -5   9  -3   14.26    2.94
   5  -9   3   12.51    2.78
  -5   9  -3   10.21    3.05
  -5   9  -3    9.08    2.41
  -5   9  -4    8.44    2.19
   5  -9   4    5.91    2.36
  -5   9  -4   10.40    2.77
  -5   9  -5    0.65    1.19
   5  -9   5   -0.14    1.82
  -5   9  -5    0.46    1.59
   5  -9   6    0.24    1.78
  -5   9  -6   -1.82    1.51
   5  -9   7    1.89    1.79
  -5   9  -7   -0.05    1.68
   5  -9   8    2.99    2.11
  -5   9  -8    6.22    2.54
   5  -9   9   16.70    3.80
  -5   9  -9   17.75    3.19
   5  -9  10    2.48    2.19
  -5   9 -10    4.35    1.92
   5  -9  11   65.95    7.84
  -5   9 -11   67.50    5.88
   5  -9  12    5.64    2.94
   5  -9  13   13.73    3.84
   5  -9  14   13.09    4.18
   5  -8 -17   12.64    4.30
  -5   8  17   18.99    5.14
   5  -8 -16    2.46    3.00
  -5   8  16    9.59    3.84
   5  -8 -15   47.96    7.19
   5  -8 -14   -1.37    2.10
   5  -8 -13   -0.30    1.82
   5  -8 -12   21.45    4.54
   5  -8 -11    0.95    2.33
   5  -8 -10    8.29    2.94
   5  -8  -9   43.77    5.81
   5  -8  -8   23.19    4.34
  -5   8   7   48.86    5.43
   5  -8  -7   59.83    6.19
   5  -8  -6   26.85    4.19
  -5   8   6   32.47    4.50
   5  -8  -5  175.32    4.82
  -5   8   5  186.84   10.04
   5  -8  -5  167.94    9.71
  -5   8   4    8.10    0.99
   5  -8  -4    9.57    2.57
   5  -8  -4   10.53    1.45
  -5   8   4    8.15    2.44
  -5   8   3   76.55    6.46
   5  -8  -3   74.71    6.24
   5  -8  -3   73.46    4.20
  -5   8   3   69.14    6.00
  -5   8   3   73.07    3.63
  -5   8   2    5.94    2.09
   5  -8  -2    7.24    2.28
   5  -8  -2    8.50    1.80
  -5   8   2    7.44    1.49
  -5   8   1    7.16    2.11
   5  -8  -1   11.31    2.33
  -5   8   1    9.00    1.76
  -5   8   0    4.27    1.79
   5  -8   0    0.34    1.23
  -5   8   0    3.16    1.34
  -5   8  -1    6.44    2.15
  -5   8  -1    4.04    1.62
  -5   8  -2   14.19    2.66
   5  -8   2   19.41    3.19
  -5   8  -2   22.84    3.27
  -5   8  -3    3.12    1.18
   5  -8   3    6.88    2.25
  -5   8  -3    6.69    2.16
  -5   8  -4    0.92    1.80
   5  -8   4   -0.67    1.29
  -5   8  -4    2.19    1.71
  -5   8  -5   21.09    3.10
  -5   8  -5   22.29    3.64
   5  -8   5   21.42    3.57
  -5   8  -6    2.57    1.27
  -5   8  -6    4.20    1.94
   5  -8   6    5.11    2.12
  -5   8  -7    4.01    1.76
  -5   8  -7    4.21    2.08
   5  -8   7    3.43    2.01
  -5   8  -8    7.44    2.04
   5  -8   8    5.52    2.24
  -5   8  -8   12.08    2.71
  -5   8  -9    3.11    1.71
   5  -8   9    3.71    2.44
  -5   8  -9    2.58    1.99
   5  -8  10   34.42    5.56
  -5   8 -10   44.97    4.50
   5  -8  11   -0.30    2.47
   5  -8  12   14.73    4.10
   5  -8  13   16.28    4.36
   5  -8  14   12.47    4.42
   5  -7 -18   18.73    5.28
  -5   7  18   22.77    4.87
   5  -7 -17    5.23    3.60
  -5   7  17   -5.18    2.92
  -5   7  16   27.88    5.32
   5  -7 -16   26.38    5.79
   5  -7 -15   22.79    5.24
   5  -7 -14   21.33    4.91
   5  -7 -13   40.83    6.23
   5  -7 -12    1.39    1.85
   5  -7 -11  101.87    8.86
   5  -7 -10   39.08    5.55
   5  -7  -9   51.98    6.10
   5  -7  -8  110.50    8.47
   5  -7  -7    0.73    1.91
  -5   7   7    0.81    1.63
  -5   7   6  105.39    7.55
   5  -7  -6  102.66    3.38
   5  -7  -6   99.08    7.42
  -5   7   5    7.61    0.83
   5  -7  -5    5.22    2.07
  -5   7   5    7.45    2.32
   5  -7  -5    8.16    1.27
  -5   7   5   11.37    2.96
  -5   7   4   90.64    6.93
   5  -7  -4   83.98    6.41
  -5   7   4   74.30    6.10
   5  -7  -4   71.40    3.84
  -5   7   4   63.22    3.04
  -5   7   3   40.44    4.64
   5  -7  -3   34.65    3.99
  -5   7   3   32.93    4.07
   5  -7  -3   34.00    4.20
  -5   7   3   30.50    2.46
   5  -7  -3   33.74    2.96
  -5   7   2   41.65    4.53
   5  -7  -2   36.66    4.06
   5  -7  -2   44.82    4.71
  -5   7   2   33.77    2.91
   5  -7  -2   35.03    3.21
  -5   7   1   12.34    2.77
   5  -7  -1    4.61    1.50
   5  -7  -1    9.00    2.27
   5  -7  -1    3.45    1.42
  -5   7   1    7.01    1.58
  -5   7   0   13.32    2.62
   5  -7   0   10.90    2.25
   5  -7   0    8.97    2.14
  -5   7   0   11.95    2.18
  -5   7  -1    7.69    2.09
   5  -7   1    8.59    2.01
  -5   7  -1    7.31    1.88
   5  -7   2    8.92    2.27
  -5   7  -2    5.45    1.64
  -5   7  -2    5.62    1.95
   5  -7   3    1.96    1.67
  -5   7  -3    0.42    1.06
  -5   7  -3    0.27    1.17
  -5   7  -4    3.24    1.18
  -5   7  -4    5.74    1.86
   5  -7   4    1.71    1.85
  -5   7  -5   40.38    4.02
   5  -7   5   47.31    5.35
  -5   7  -6    0.99    0.94
   5  -7   6    1.48    1.84
  -5   7  -7   45.91    4.32
   5  -7   7   51.62    5.94
  -5   7  -8   40.55    4.17
   5  -7   8   42.23    5.61
  -5   7  -9   31.89    3.74
   5  -7   9   29.03    4.74
  -5   7 -10   -0.09    0.92
   5  -7  10   -0.67    2.22
   5  -7  11   39.56    5.85
   5  -7  12    7.05    3.10
   5  -7  13    7.25    3.27
   5  -7  14   13.26    4.19
   5  -7  15    6.15    2.99
   5  -6 -19   13.96    4.56
   5  -6 -18   -3.93    3.42
  -5   6  18    0.09    2.31
   5  -6 -17   36.02    6.50
  -5   6  17   43.66    6.61
   5  -6 -16   12.61    3.89
  -5   6  16   10.60    3.51
   5  -6 -15   21.09    4.95
   5  -6 -14   43.13    6.47
   5  -6 -14   43.35    2.84
   5  -6 -13    3.92    3.08
   5  -6 -13    1.66    0.61
   5  -6 -13    2.26    0.77
   5  -6 -12   63.08    7.10
   5  -6 -12   73.00    2.89
   5  -6 -12   75.48    2.89
   5  -6 -11   20.31    4.22
   5  -6 -11   18.87    1.18
   5  -6 -10   64.70    6.82
   5  -6  -9  119.47    8.89
   5  -6  -9  106.90    2.66
   5  -6  -8    7.69    2.83
   5  -6  -8    7.77    0.93
   5  -6  -8    8.73    0.93
  -5   6   7  113.87    7.78
   5  -6  -7  113.79    8.03
   5  -6  -7  110.54    3.75
   5  -6  -7  120.74    3.77
   5  -6  -6   36.68    4.41
   5  -6  -6   41.58    4.90
   5  -6  -6   38.90    2.54
  -5   6   6   35.85    4.33
   5  -6  -5   41.82    4.56
  -5   6   5   39.16    2.30
   5  -6  -5   35.43    2.66
   5  -6  -5   45.09    4.90
  -5   6   5   35.89    4.29
  -5   6   4   40.94    4.63
   5  -6  -4   27.28    3.62
   5  -6  -4   32.57    2.80
   5  -6  -4   31.79    4.15
  -5   6   4   29.26    3.81
  -5   6   4   24.30    2.06
  -5   6   3    5.79    1.24
  -5   6   3    5.05    2.13
   5  -6  -3    3.80    1.63
   5  -6  -3    2.37    1.13
  -5   6   3    5.79    2.05
   5  -6  -3    5.61    1.82
   5  -6  -2    5.20    1.56
   5  -6  -2    2.95    1.51
   5  -6  -2    4.84    1.86
  -5   6   2    5.52    2.00
  -5   6   2    4.47    1.29
  -5   6   1   -0.11    1.17
   5  -6  -1   -0.74    1.01
   5  -6  -1   -0.87    1.29
   5  -6  -1   -0.69    1.28
  -5   6   1    0.97    1.19
   5  -6   0   21.25    2.81
  -5   6   0   24.91    3.18
   5  -6   0   24.13    3.29
  -5   6   0   15.91    2.40
  -5   6  -1    1.23    1.43
   5  -6   1   -0.87    1.84
  -5   6  -1    0.31    1.20
   5  -6   1    0.59    0.91
  -5   6  -2   -0.55    1.06
   5  -6   2   -0.37    1.43
  -5   6  -2    0.01    1.34
  -5   6  -3   23.59    2.78
   5  -6   3   23.06    3.57
  -5   6  -3   26.80    3.75
  -5   6  -4   11.66    1.97
   5  -6   4    8.81    2.25
  -5   6  -4   13.86    2.78
  -5   6  -5   69.76    4.67
   5  -6   5   66.98    6.25
   5  -6   6    1.25    1.56
  -5   6  -6    1.47    0.95
  -5   6  -7    1.47    0.96
   5  -6   7    1.31    1.66
  -5   6  -8   23.05    2.91
   5  -6   8   14.89    3.56
  -5   6  -9   19.98    2.77
   5  -6   9   23.13    4.44
  -5   6 -10   78.96    5.63
   5  -6  10   82.01    8.10
   5  -6  11   18.01    4.15
   5  -6  12   19.38    4.31
   5  -6  13   33.95    5.81
   5  -6  14    4.99    2.72
   5  -6  15   22.88    5.45
   5  -5 -19   -1.41    2.51
  -5   5  19    3.03    2.74
   5  -5 -18   28.12    6.15
  -5   5  18   25.72    5.26
  -5   5  17    6.81    2.92
   5  -5 -17    1.16    2.04
   5  -5 -16   20.87    4.96
  -5   5  16   32.15    5.68
   5  -5 -15   57.57    4.20
   5  -5 -15   49.14    7.13
   5  -5 -14   -0.76    2.95
   5  -5 -14    3.18    1.05
   5  -5 -13   62.57    3.92
   5  -5 -13   57.20    7.05
   5  -5 -13   52.43    3.30
   5  -5 -12    0.42    1.74
   5  -5 -12    0.59    0.60
   5  -5 -12    2.79    0.82
   5  -5 -11   65.46    3.36
   5  -5 -11   60.19    6.72
   5  -5 -11   63.71    3.45
   5  -5 -10   77.25    7.33
   5  -5 -10   88.26    3.71
   5  -5 -10   88.16    3.78
   5  -5  -9  101.64    7.93
   5  -5  -9  103.36    3.88
   5  -5  -9  112.67    4.14
   5  -5  -8  123.23    8.38
   5  -5  -8  109.49    3.91
   5  -5  -8  112.38    4.20
   5  -5  -7   35.72    4.54
  -5   5   7   38.05    4.42
   5  -5  -7   37.68    2.36
   5  -5  -7   38.77    2.56
   5  -5  -6  159.18    8.77
  -5   5   6  156.80    8.63
   5  -5  -6  163.19    5.00
  -5   5   5   77.00    3.65
   5  -5  -5   88.74    6.25
  -5   5   5   83.27    6.15
   5  -5  -5   84.20    3.88
   5  -5  -4   16.42    2.74
  -5   5   4   13.81    1.76
   5  -5  -4   15.48    2.95
  -5   5   4   13.80    2.65
   5  -5  -4   13.77    1.84
   5  -5  -3  122.29    6.62
   5  -5  -3  127.53    7.52
   5  -5  -3  111.22    5.15
  -5   5   3  120.12    5.31
  -5   5   2   62.69    4.80
   5  -5  -2   57.95    4.97
   5  -5  -2   55.59    4.17
  -5   5   2   55.67    3.88
   5  -5  -2   50.71    4.08
  -5   5   1   16.80    2.56
   5  -5  -1   19.22    2.56
   5  -5  -1   21.25    2.79
   5  -5  -1   15.59    2.70
  -5   5   1   21.15    2.67
  -5   5   0    3.97    1.36
   5  -5   0    7.43    1.60
   5  -5   0    8.94    2.08
  -5   5   0    7.69    1.81
  -5   5  -1    4.76    1.65
   5  -5   1    4.06    1.24
   5  -5   1    1.67    1.06
  -5   5  -1    4.24    1.59
  -5   5  -2    1.99    1.06
   5  -5   2    0.45    1.10
  -5   5  -2    1.79    1.46
  -5   5  -3    3.96    1.12
  -5   5  -3    9.15    2.23
   5  -5   3    6.10    2.17
  -5   5  -4   18.07    2.21
   5  -5   4   24.31    3.81
  -5   5  -4   20.45    3.39
  -5   5  -5   22.53    2.43
   5  -5   5   19.27    3.65
  -5   5  -6    1.02    0.88
   5  -5   6    2.80    2.18
  -5   5  -7  203.15    7.49
   5  -5   7  210.72   11.58
   5  -5   8   23.29    4.44
  -5   5  -8   16.87    2.27
  -5   5  -9   19.45    2.59
   5  -5   9   20.49    4.37
  -5   5 -10   19.94    2.77
   5  -5  10   20.89    4.41
   5  -5  11   17.07    4.26
   5  -5  12   14.48    4.08
   5  -5  13    3.20    2.63
   5  -5  14   39.72    6.50
   5  -5  15   11.13    3.81
  -5   4  19   16.00    4.21
   5  -4 -19   13.95    4.89
   5  -4 -18    4.57    3.27
  -5   4  18    4.24    3.00
   5  -4 -17   33.67    6.38
  -5   4  17   24.42    4.83
   5  -4 -16   71.27    8.66
  -5   4  16   78.86    8.28
   5  -4 -15    8.05    4.14
   5  -4 -14   56.42    7.30
   5  -4 -14   66.49    4.45
   5  -4 -13    0.43    0.81
   5  -4 -13    0.07    0.88
   5  -4 -12  123.61    5.89
   5  -4 -12  117.54    5.52
   5  -4 -12  108.40    9.16
   5  -4 -11    5.97    1.29
   5  -4 -11    8.52    3.03
   5  -4 -11    5.89    1.37
   5  -4 -10   34.85    2.83
   5  -4 -10   38.92    5.31
   5  -4 -10   35.68    2.90
   5  -4  -9  109.79    8.27
   5  -4  -9  112.88    4.86
   5  -4  -9  109.32    4.86
   5  -4  -8   11.75    1.57
   5  -4  -8   13.98    3.27
   5  -4  -8   12.82    1.72
   5  -4  -8   15.04    2.80
   5  -4  -7    3.61    1.84
  -5   4   7    2.99    1.58
   5  -4  -7    4.47    1.21
   5  -4  -7    3.46    0.96
   5  -4  -6   36.65    4.25
  -5   4   6   35.08    4.09
   5  -4  -6   35.05    2.68
   5  -4  -5    3.24    1.94
  -5   4   5    1.83    0.81
  -5   4   5    2.14    1.55
   5  -4  -5    2.45    1.00
   5  -4  -4   22.23    3.13
  -5   4   4   20.56    3.03
   5  -4  -4   15.01    1.93
  -5   4   4   18.77    2.16
   5  -4  -3   35.22    3.50
   5  -4  -3   28.75    2.79
  -5   4   3   30.84    2.88
   5  -4  -2  131.78    6.14
   5  -4  -2  129.68    6.12
  -5   4   2  137.24    6.20
   5  -4  -1   -0.58    1.13
   5  -4  -1    1.85    1.37
   5  -4  -1    0.35    1.13
  -5   4   1    2.36    1.28
  -5   4   0   55.87    3.80
   5  -4   0   55.84    3.59
   5  -4   0   60.80    4.66
  -5   4   0   56.92    4.48
  -5   4  -1    2.26    0.95
   5  -4   1    2.84    0.88
   5  -4   1    2.97    1.29
  -5   4  -1    4.88    1.39
  -5   4  -2    4.08    1.23
   5  -4   2    3.91    1.38
  -5   4  -2    2.35    1.45
  -5   4  -3   62.83    3.51
   5  -4   3   61.71    5.65
   5  -4   3   58.06    4.03
  -5   4  -3   64.67    5.52
  -5   4  -4    3.26    0.96
   5  -4   4    3.01    1.80
  -5   4  -4    3.10    1.69
  -5   4  -5  158.11    5.44
   5  -4   5  152.41    9.23
  -5   4  -6   71.76    3.81
   5  -4   6   69.60    6.53
  -5   4  -7   22.77    2.28
   5  -4   7   24.15    4.36
  -5   4  -8   98.18    4.82
   5  -4   8   89.14    7.92
  -5   4  -9   67.34    4.23
   5  -4   9   80.67    7.64
   5  -4  10   22.53    4.37
   5  -4  11   60.42    7.13
   5  -4  12    0.47    2.06
   5  -4  13   75.94    8.49
   5  -4  14   11.53    3.91
   5  -4  15    8.39    3.52
   5  -4  16    7.36    3.71
   5  -3 -20    7.29    3.79
  -5   3  20    4.81    2.66
   5  -3 -19   11.85    4.72
  -5   3  19   15.63    4.22
  -5   3  18   30.66    5.56
   5  -3 -18   36.00    6.60
  -5   3  17   18.68    4.23
   5  -3 -17   21.01    5.45
  -5   3  16    2.40    2.19
  -5   3  15   97.16    8.73
   5  -3 -15  105.95    6.45
   5  -3 -14   -0.76    1.22
   5  -3 -13   51.07    4.15
   5  -3 -12   44.61    3.81
   5  -3 -11   40.58    3.61
   5  -3 -11   45.46    3.65
   5  -3 -10  240.72    8.09
   5  -3 -10  247.38    8.43
   5  -3  -9    0.05    0.77
   5  -3  -9   -0.80    0.90
   5  -3  -9    0.50    1.08
   5  -3  -8   12.44    1.86
   5  -3  -8    9.85    1.72
   5  -3  -8    7.10    1.91
   5  -3  -7   62.90    5.82
  -5   3   7   71.45    5.62
   5  -3  -7   63.45    3.95
   5  -3  -7   72.42    4.27
   5  -3  -6    5.96    1.48
   5  -3  -6    4.78    2.27
  -5   3   6    5.36    1.76
  -5   3   5   22.45    2.41
   5  -3  -5   22.61    3.16
  -5   3   5   26.47    3.42
   5  -3  -5   24.92    2.61
   5  -3  -4   18.01    2.71
  -5   3   4   15.76    2.12
  -5   3   4   16.66    2.66
   5  -3  -4   15.70    2.15
   5  -3  -3   38.13    3.44
   5  -3  -3   40.85    3.44
  -5   3   3   38.51    3.38
   5  -3  -2   25.13    2.64
  -5   3   2   26.30    2.86
   5  -3  -2   21.05    2.67
   5  -3  -1   14.43    1.87
  -5   3   1   14.29    2.31
   5  -3  -1   12.82    2.24
   5  -3   0   43.56    2.82
  -5   3   0   49.10    4.31
   5  -3   1    0.50    0.51
   5  -3   1    0.51    1.21
  -5   3  -1   -1.49    1.32
   5  -3   2  100.79    5.19
  -5   3  -2   99.21    3.78
  -5   3  -2   98.83    6.47
  -5   3  -3    8.50    1.14
   5  -3   3    7.14    1.49
   5  -3   3   12.33    2.95
  -5   3  -3    6.39    1.97
  -5   3  -4  202.83    4.80
   5  -3   4  202.54   10.24
   5  -3   4  199.80    6.53
  -5   3  -4  221.74   10.42
  -5   3  -5   87.82    3.21
   5  -3   5   83.97    6.98
  -5   3  -6   37.34    2.23
   5  -3   6   41.54    5.09
  -5   3  -7   38.21    2.42
   5  -3   7   34.26    4.83
  -5   3  -8    5.66    1.10
   5  -3   8    3.24    1.93
  -5   3  -9   29.06    2.49
   5  -3   9   28.70    4.73
   5  -3  10   30.53    5.03
   5  -3  11   11.52    3.77
   5  -3  12   83.58    8.55
   5  -3  13   13.11    4.32
   5  -3  14   24.26    5.10
   5  -3  15   39.30    6.57
   5  -3  16    4.20    3.23
  -5   2  20    4.91    2.24
  -5   2  19    4.63    2.70
  -5   2  18   19.53    4.54
  -5   2  18   17.94    3.17
  -5   2  17   -3.09    2.12
  -5   2  17    0.44    1.22
  -5   2  16   98.19    9.01
  -5   2  15    4.08    2.36
   5  -2 -15   11.24    2.58
   5  -2 -14   74.18    5.61
   5  -2 -13    6.09    1.78
   5  -2 -12  210.74    8.67
   5  -2 -11   73.50    5.01
   5  -2 -10    0.44    0.77
   5  -2  -9   95.90    6.72
   5  -2  -9   94.36    5.36
   5  -2  -9   97.41    5.60
   5  -2  -8  134.41    7.53
   5  -2  -8  132.61    6.23
   5  -2  -8  126.21    6.23
   5  -2  -7   -1.00    1.11
  -5   2   7   -0.26    1.25
   5  -2  -7   -0.36    1.05
   5  -2  -6   20.17    2.56
  -5   2   6   17.69    2.85
  -5   2   5   73.17    4.63
  -5   2   5   69.73    5.13
   5  -2  -5   71.16    4.58
   5  -2  -4   73.28    4.94
  -5   2   4   79.41    5.34
   5  -2  -4   79.33    4.93
  -5   2   4   77.36    4.83
   5  -2  -3   22.80    2.76
  -5   2   3   25.23    2.86
   5  -2  -3   23.43    2.83
   5  -2  -2    4.57    1.27
  -5   2   2    5.63    1.53
   5  -2  -2    4.43    1.53
  -5   2   1   10.89    2.21
   5  -2  -1   10.85    1.53
   5  -2   0   32.17    2.11
  -5   2   0   30.65    3.44
   5  -2   1    3.09    0.60
  -5   2  -1    4.99    1.79
  -5   2  -2   -0.22    1.17
   5  -2   3   53.43    3.46
   5  -2   3   54.80    5.23
  -5   2  -3   51.99    4.93
   5  -2   4  103.33    4.37
   5  -2   4  104.36    7.45
  -5   2  -4  113.12    7.56
   5  -2   5   12.46    2.99
   5  -2   6  171.41   10.12
  -5   2  -7    6.75    0.77
   5  -2   7   10.34    2.91
  -5   2  -8   11.57    1.23
   5  -2   8   12.39    3.24
   5  -2   9   58.30    6.49
   5  -2  10   26.32    4.74
  -5   2 -10   28.24    2.55
  -5   2 -11  118.24    5.44
   5  -2  11  129.47   10.19
   5  -2  12    1.30    2.09
   5  -2  13   54.85    7.13
   5  -2  14   17.69    4.35
   5  -2  15   12.90    4.29
   5  -2  16   20.82    5.20
  -5   1  20    5.51    2.85
  -5   1  19   11.56    3.70
  -5   1  19    7.25    2.43
  -5   1  18   24.78    4.99
  -5   1  18   13.46    3.09
  -5   1  17   52.03    6.73
  -5   1  17   49.56    5.28
  -5   1  16    2.68    1.91
  -5   1  16    2.87    1.73
  -5   1  15   58.52    6.66
   5  -1 -15   53.62    5.20
  -5   1  15   65.19    5.70
   5  -1 -14   77.89    6.08
  -5   1  14   65.05    6.76
   5  -1 -13   69.90    5.52
   5  -1 -12  103.92    6.69
   5  -1 -12  109.44    6.67
   5  -1 -11    7.30    1.94
   5  -1 -10  194.24    9.49
   5  -1 -10  199.80    8.48
   5  -1  -9    3.42    1.34
   5  -1  -9    2.12    1.15
   5  -1  -8   49.09    4.48
   5  -1  -8   45.00    3.90
   5  -1  -7    4.97    1.54
   5  -1  -7    5.44    1.54
  -5   1   6   29.76    3.31
   5  -1  -6   32.19    3.25
   5  -1  -6   32.87    3.37
  -5   1   5   86.75    5.32
  -5   1   5   84.38    5.40
   5  -1  -5   93.48    5.58
   5  -1  -4    3.14    1.36
  -5   1   4    4.74    1.55
  -5   1   4    2.05    1.19
  -5   1   3    0.42    1.11
  -5   1   2   14.22    2.35
   5  -1  -1   30.46    2.29
  -5   1   1   27.65    3.36
   5  -1   0  148.40    3.90
  -5   1   0  166.69    8.15
  -5   1  -1   58.86    5.06
  -5   1  -2  204.14    9.55
   5  -1   3   59.74    5.66
  -5   1  -3   65.94    5.69
   5  -1   4   22.43    2.03
   5  -1   4   25.97    3.89
  -5   1  -4   25.58    3.86
   5  -1   5  123.51    3.79
   5  -1   5  135.47    8.73
   5  -1   6    4.73    2.12
   5  -1   7   24.54    4.34
   5  -1   8   45.55    5.71
  -5   1  -9   23.96    1.69
   5  -1   9   22.79    4.39
  -5   1 -10   40.45    2.57
   5  -1  10   35.53    5.40
  -5   1 -11    1.56    0.88
   5  -1  11    2.05    2.07
   5  -1  12   57.12    7.04
   5  -1  13   51.41    6.91
   5  -1  14    9.49    3.24
   5  -1  15   43.01    6.85
   5  -1  16   -2.16    2.83
  -5   0  21   14.99    4.43
  -5   0  20    1.14    2.41
  -5   0  20   -2.35    1.71
  -5   0  19    8.12    3.39
  -5   0  19   12.75    3.18
  -5   0  18   10.68    3.60
  -5   0  18    9.69    2.69
  -5   0  17    6.66    2.62
  -5   0  17    1.88    1.78
  -5   0  16   50.96    6.32
  -5   0  16   49.61    5.45
  -5   0  15   16.09    3.73
  -5   0  15   17.37    3.25
  -5   0  14    4.81    2.25
  -5   0  14    3.45    1.52
   5   0 -13   35.53    4.19
   5   0 -12   12.44    2.64
   5   0 -12   15.31    2.74
   5   0 -11  103.15    6.83
   5   0 -11  115.21    7.44
   5   0 -11  123.66    7.27
   5   0 -10   22.11    3.12
   5   0 -10   26.55    3.49
   5   0  -9   93.48    6.25
   5   0  -9  107.21    6.41
   5   0  -8   26.17    3.25
   5   0  -8   27.80    3.35
   5   0  -7   74.11    5.16
  -5   0   6    0.43    1.08
   5   0  -6    1.50    1.32
  -5   0   5   10.76    2.10
  -5   0   5    9.89    2.00
  -5   0   4   38.82    3.81
  -5   0   4   33.31    3.26
  -5   0   3    4.85    1.65
  -5   0   2    7.96    1.92
  -5   0   1   13.49    2.42
   5   0   0    1.76    0.70
  -5   0   0    0.68    1.02
  -5   0  -1   -0.24    1.04
  -5   0  -2   19.03    3.09
  -5   0  -3   14.79    2.86
   5   0   4  180.48   10.01
  -5   0  -4  189.45   10.08
   5   0   5    6.04    0.97
   5   0   5    5.71    2.35
   5   0   6   86.10    7.30
   5   0   7   77.63    7.22
   5   0   8    9.22    3.37
  -5   0  -9  108.28    2.95
   5   0   9  106.58    8.84
  -5   0 -10    1.34    0.50
   5   0  10    0.89    1.62
   5   0  11  124.56   10.11
   5   0  12    5.91    2.81
   5   0  13    4.79    2.33
   5   0  14   15.38    4.11
   5   0  15   -4.42    3.17
   5   0  16    2.56    2.72
  -5  -1  21   15.74    4.44
  -5  -1  21    3.74    1.97
  -5  -1  20   27.66    5.44
  -5  -1  20   24.20    4.52
  -5  -1  19    5.73    2.78
  -5  -1  19    2.75    1.99
  -5  -1  18    0.57    1.81
  -5  -1  18    3.08    2.09
  -5  -1  17   48.98    6.42
  -5  -1  17   49.16    5.72
  -5  -1  16   13.58    3.36
  -5  -1  16   19.63    3.85
  -5  -1  15    0.56    1.53
  -5  -1  15   -0.52    1.56
  -5  -1  14   29.62    4.52
  -5  -1  14   28.40    4.07
  -5  -1  13   26.00    4.17
   5   1 -12   63.22    5.78
   5   1 -12   63.10    5.62
   5   1 -11   46.27    4.86
   5   1 -11   34.65    4.03
   5   1 -11   52.24    4.99
   5   1 -10    7.03    2.18
   5   1 -10   10.15    2.35
   5   1 -10    7.03    1.89
   5   1  -9   80.72    6.02
   5   1  -9   77.82    5.54
   5   1  -9   87.04    6.08
   5   1  -8   22.72    3.22
   5   1  -8   21.19    2.81
   5   1  -8   26.91    3.39
   5   1  -7   26.32    3.33
   5   1  -6   10.77    2.13
  -5  -1   5   72.37    5.36
  -5  -1   5   70.82    4.56
  -5  -1   4    2.03    1.30
  -5  -1   4    1.22    0.99
  -5  -1   3   43.53    4.28
  -5  -1   2  113.37    6.92
  -5  -1   1  133.83    7.65
  -5  -1   0   25.68    3.45
  -5  -1  -1   27.24    3.70
  -5  -1  -2   89.46    6.69
   5   1   3   59.59    5.80
  -5  -1  -3   62.56    5.77
   5   1   4   -1.03    1.90
   5   1   5  166.27   10.06
   5   1   6   37.49    5.26
   5   1   7   70.87    7.00
   5   1   8   53.04    6.18
   5   1   9    6.68    2.87
  -5  -1 -10   86.23    3.33
   5   1  10   93.94    8.57
   5   1  11   29.40    4.88
   5   1  12    7.99    3.11
   5   1  13   39.20    6.03
   5   1  14    4.87    2.83
   5   1  15   16.00    4.31
   5   1  16    2.03    2.97
  -5  -2  22   -4.82    3.00
  -5  -2  21   17.07    4.17
  -5  -2  20    5.73    2.35
  -5  -2  19   23.52    4.69
  -5  -2  19   23.23    4.38
  -5  -2  18   27.03    5.07
  -5  -2  18   23.62    4.38
  -5  -2  17    3.01    2.29
  -5  -2  17   10.15    2.89
  -5  -2  16   15.97    3.54
  -5  -2  16   11.57    3.10
  -5  -2  15   29.96    4.55
  -5  -2  15   37.73    4.97
  -5  -2  14    2.35    2.06
  -5  -2  14    2.10    1.91
  -5  -2  13   26.04    4.01
   5   2 -12   18.09    3.46
  -5  -2  12   15.42    3.03
   5   2 -12   18.14    3.05
   5   2 -11   11.18    2.68
   5   2 -11   17.07    2.84
   5   2 -10    2.78    1.45
   5   2 -10    2.21    1.48
   5   2 -10    3.19    1.41
   5   2  -9    5.63    1.97
   5   2  -9    5.71    1.82
   5   2  -9    7.17    1.85
   5   2  -8  111.03    7.33
   5   2  -8  112.20    6.09
   5   2  -8  101.58    6.76
   5   2  -7   18.74    3.07
   5   2  -7   18.20    3.06
   5   2  -6    1.15    1.24
   5   2  -6    1.14    1.15
   5   2  -5   18.65    3.10
  -5  -2   5   16.60    2.20
   5   2  -5   14.95    2.63
   5   2  -4   16.67    2.87
  -5  -2   4   16.85    2.75
  -5  -2   4   16.48    2.10
  -5  -2   3   84.66    6.17
  -5  -2   3   82.02    4.47
  -5  -2   2   86.97    6.26
  -5  -2   1   43.35    4.66
  -5  -2   0    3.58    1.37
   5   2   0    4.88    0.92
   5   2   1    0.77    0.40
  -5  -2  -1   -0.28    1.14
   5   2   1    0.57    1.37
   5   2   2  322.00    4.81
   5   2   2  343.12   13.33
  -5  -2  -2  341.12   13.32
   5   2   3    1.51    1.80
   5   2   4  129.50    8.80
   5   2   5   64.50    6.57
   5   2   6   58.77    6.49
   5   2   7   63.09    6.80
   5   2   8    1.30    1.84
  -5  -2  -9   67.99    2.83
   5   2   9   61.93    6.91
   5   2  10   11.15    3.42
   5   2  11   18.90    4.19
   5   2  12   29.26    5.41
   5   2  13    3.90    2.62
   5   2  14   21.83    4.68
   5   2  15    0.94    2.21
   5   2  16    8.56    3.31
  -5  -3  22   14.02    4.02
  -5  -3  21   10.34    3.31
  -5  -3  20    6.32    2.40
  -5  -3  19   24.59    4.64
  -5  -3  18   -4.10    2.49
  -5  -3  18    0.57    1.90
  -5  -3  17   37.55    5.37
  -5  -3  17   36.40    5.35
  -5  -3  16   10.08    3.00
  -5  -3  16    4.05    2.49
  -5  -3  15    0.87    1.70
  -5  -3  15   -0.42    1.97
  -5  -3  14   71.74    6.58
  -5  -3  14   78.12    7.13
  -5  -3  13   -0.33    1.51
  -5  -3  12   44.14    4.73
   5   3 -12   42.93    5.26
   5   3 -12   47.39    4.69
   5   3 -11  143.89    9.19
  -5  -3  11  139.75    7.89
   5   3 -11  151.25    8.01
   5   3 -10   38.43    4.74
  -5  -3  10   50.30    4.56
   5   3 -10   44.16    4.16
   5   3  -9   31.01    4.12
   5   3  -9   27.74    3.22
   5   3  -8   26.73    3.69
   5   3  -8   23.31    3.66
   5   3  -8   23.06    2.72
   5   3  -7   24.45    3.50
   5   3  -7   18.06    3.24
   5   3  -6   65.08    5.56
   5   3  -6   55.30    5.36
   5   3  -5   61.94    5.40
   5   3  -5   56.69    5.42
   5   3  -4    6.41    2.03
  -5  -3   4    9.44    2.27
  -5  -3   4    8.04    1.49
  -5  -3   3   20.23    3.25
  -5  -3   3   17.02    1.96
  -5  -3   2   26.74    3.70
   5   3  -1   54.29    5.32
  -5  -3   1   52.01    5.13
   5   3   0   11.89    1.56
  -5  -3   0   11.00    2.53
   5   3   0   13.62    3.20
   5   3   1   69.21    3.40
   5   3   1   64.69    5.87
  -5  -3  -1   68.53    6.10
   5   3   2    0.67    0.60
   5   3   2   -0.69    1.34
   5   3   3  167.59    4.69
   5   3   3  168.24    9.90
   5   3   4   17.96    3.56
  -5  -3  -5  152.02    8.25
   5   3   5  161.31   10.15
  -5  -3  -6  147.39    8.50
   5   3   6  144.61    9.94
   5   3   7   48.64    2.01
   5   3   7   56.33    6.62
   5   3   8   37.78    5.52
   5   3   8   38.15    5.30
   5   3   9   24.63    4.70
   5   3  10   25.81    4.89
   5   3  11   36.18    5.65
   5   3  12   -0.42    2.39
   5   3  13   33.27    5.83
   5   3  14   -1.89    2.30
   5   3  15   19.45    4.73
   5   3  16    5.56    2.56
  -5  -4  21    1.78    2.43
  -5  -4  20   10.50    3.39
  -5  -4  19    1.58    2.23
  -5  -4  18   17.06    3.92
  -5  -4  17   19.10    4.21
  -5  -4  16    8.29    2.77
  -5  -4  16    9.55    3.06
  -5  -4  15   10.99    2.94
  -5  -4  15   15.10    3.66
  -5  -4  14   14.00    3.14
  -5  -4  14   15.14    3.56
  -5  -4  13   62.52    5.84
   5   4 -13   54.03    6.29
   5   4 -12    6.66    2.43
  -5  -4  12    9.46    2.33
   5   4 -12    5.86    1.92
   5   4 -11   48.02    5.63
  -5  -4  11   40.69    4.16
   5   4 -11   42.87    4.17
   5   4 -10    0.54    1.36
  -5  -4  10    1.23    1.13
   5   4 -10    0.01    0.86
   5   4  -9   10.78    2.74
  -5  -4   9   10.99    2.00
   5   4  -9   12.31    2.06
   5   4  -8   21.86    3.77
   5   4  -7    3.69    1.94
   5   4  -6   51.63    5.40
   5   4  -5    0.27    1.08
   5   4  -4   42.73    4.91
   5   4  -3    9.01    2.60
  -5  -4   3    8.88    2.50
  -5  -4   3    9.44    1.40
   5   4  -2   37.54    4.65
   5   4  -1   -0.21    0.79
   5   4  -1    1.94    1.72
   5   4   0   32.68    2.89
   5   4   0   32.52    4.52
   5   4   1    9.85    1.62
   5   4   1    4.91    2.03
   5   4   2  242.12    7.14
   5   4   2  214.68   11.26
   5   4   3   26.11    2.35
   5   4   3   23.13    4.05
   5   4   4   36.24    2.79
   5   4   4   34.58    4.87
  -5  -4  -5  214.80    9.57
   5   4   5  220.93   12.17
  -5  -4  -6    3.08    1.43
   5   4   6    2.64    2.32
   5   4   7   64.68    3.25
   5   4   7   63.68    7.10
   5   4   8   16.53    4.22
   5   4   9   22.43    4.43
   5   4  10   17.82    4.11
   5   4  11    7.41    3.12
   5   4  12   17.83    4.45
   5   4  13    5.10    3.12
   5   4  14   14.29    4.46
   5   4  15    2.32    3.09
  -5  -5  20   -7.32    3.22
  -5  -5  19   33.54    5.73
  -5  -5  18    3.57    2.12
  -5  -5  17    6.29    2.65
  -5  -5  16    7.21    3.12
  -5  -5  15    6.09    2.89
  -5  -5  14   24.04    3.77
  -5  -5  14   28.77    4.84
   5   5 -13   -0.86    1.91
  -5  -5  13    0.55    1.07
   5   5 -13   -0.80    1.46
   5   5 -12   14.20    3.33
  -5  -5  12   14.64    2.66
   5   5 -12   14.81    2.69
   5   5 -11    3.67    1.98
  -5  -5  11    2.79    1.45
   5   5 -11    3.40    1.31
   5   5 -10   23.91    4.23
  -5  -5  10   15.79    2.37
   5   5 -10   20.93    2.69
   5   5  -9   12.27    3.02
  -5  -5   9    8.92    1.78
   5   5  -9    8.74    1.64
   5   5  -8   16.55    3.49
  -5  -5   8   16.80    2.09
   5   5  -7    0.72    1.66
  -5  -5   7    1.04    0.81
   5   5  -6    5.35    2.06
   5   5  -5   29.83    4.46
   5   5  -4    6.00    2.17
   5   5  -3    1.69    1.41
   5   5  -2    4.42    2.11
  -5  -5   2    4.57    0.87
   5   5  -1    0.58    1.45
   5   5  -1    2.21    0.83
   5   5   0   15.91    3.47
   5   5   0   10.38    1.88
  -5  -5  -1  112.09    5.19
   5   5   1  107.73    8.28
   5   5   1  109.02    5.60
   5   5   2   13.46    2.07
  -5  -5  -2   16.24    2.18
   5   5   2    9.76    2.96
   5   5   3   67.89    4.34
   5   5   3   61.59    6.33
   5   5   4   39.90    3.37
   5   5   4   40.93    5.52
  -5  -5  -5   15.28    2.70
   5   5   5   16.37    3.78
  -5  -5  -6  170.38    8.93
   5   5   6  170.30   11.17
   5   5   7   14.27    1.91
   5   5   7   12.32    3.47
   5   5   8   39.13    5.82
   5   5   9   30.07    5.08
   5   5  10    7.54    2.95
   5   5  11   41.08    6.14
   5   5  12    4.49    3.13
   5   5  13   11.84    3.74
   5   5  14    9.64    3.72
   5   5  15    0.81    2.30
  -5  -6  19    9.19    3.69
  -5  -6  18   16.94    4.62
  -5  -6  17    8.53    3.51
  -5  -6  16    0.39    1.99
  -5  -6  15   14.71    3.91
   5   6 -14   -0.35    1.59
   5   6 -13   -1.23    2.35
   5   6 -13   -2.08    1.27
   5   6 -12    6.99    2.87
   5   6 -12    5.13    1.54
   5   6 -11    7.40    2.75
   5   6 -11    7.20    1.65
   5   6 -10    2.45    2.08
  -5  -6  10    1.00    0.78
   5   6 -10    1.03    0.78
   5   6  -9    7.14    2.37
  -5  -6   9    4.59    1.30
   5   6  -8    0.96    1.31
  -5  -6   8    0.16    0.58
   5   6  -7   10.50    2.75
  -5  -6   7   11.34    1.41
  -5  -6   6    3.65    0.75
   5   6  -6    5.62    2.60
  -5  -6   5   37.18    1.59
   5   6  -5   42.26    5.36
   5   6  -4   16.93    3.45
   5   6  -3    6.48    2.62
   5   6  -2   19.46    3.70
   5   6  -2   24.94    3.30
  -5  -6   2   20.07    1.18
   5   6  -1    1.07    1.67
  -5  -6   1    1.43    0.51
  -5  -6   1    1.57    0.52
   5   6   0   42.58    5.43
  -5  -6   0   45.54    2.71
  -5  -6  -1   -0.48    0.60
   5   6   1    2.40    1.97
  -5  -6  -2   69.82    4.21
   5   6   2   60.62    6.40
   5   6   3   96.60    5.72
  -5  -6  -3  113.71    5.91
   5   6   3  113.11    8.81
   5   6   4   33.10    3.41
   5   6   4   39.03    5.41
   5   6   5  154.66    7.30
  -5  -6  -5  169.57    8.26
   5   6   5  159.78   10.82
  -5  -6  -6    1.03    1.26
   5   6   6   -1.37    1.99
   5   6   7   17.71    4.09
   5   6   8   12.87    3.76
   5   6   9   14.13    4.02
   5   6  10   18.88    4.42
   5   6  11    3.18    2.82
   5   6  12   34.67    6.04
   5   6  13    7.82    3.45
   5   6  14   -6.42    3.23
  -5  -7  18    9.61    3.22
  -5  -7  17   -4.56    2.97
   5   7 -16   20.41    5.02
  -5  -7  16   24.20    4.92
   5   7 -15    0.55    2.74
   5   7 -14   12.12    3.75
   5   7 -13   12.16    3.55
   5   7 -12    4.83    2.65
   5   7 -11    1.10    1.72
   5   7 -10    3.29    2.15
   5   7  -9    0.80    1.78
   5   7  -8    5.48    2.20
   5   7  -7    0.09    1.85
   5   7  -6   15.39    3.50
   5   7  -5    2.26    1.84
   5   7  -4    2.53    1.86
   5   7  -3   35.19    4.24
   5   7  -3   40.21    5.47
   5   7  -2    5.17    2.14
   5   7  -2    1.25    1.24
   5   7  -1   46.81    4.56
   5   7  -1   45.95    5.85
   5   7   0    5.43    2.55
   5   7   0   -0.42    0.95
   5   7   1  127.04    7.24
   5   7   1  140.06    9.97
   5   7   2   19.96    2.94
   5   7   2   15.76    3.71
   5   7   3    3.72    2.05
   5   7   4    8.58    2.87
   5   7   5   20.32    4.05
   5   7   6   64.53    7.21
   5   7   7   15.29    3.91
   5   7   8   20.62    4.35
   5   7   9   30.80    5.39
   5   7  10    1.99    2.48
   5   7  11   15.30    4.03
   5   7  12    2.99    2.54
   5   7  13   11.93    3.87
   5   8 -17   16.31    4.85
  -5  -8  17   16.83    4.46
   5   8 -16   -0.04    2.60
   5   8 -15    6.68    3.04
   5   8 -14   17.86    4.39
   5   8 -13    0.84    1.99
   5   8 -12    7.30    3.15
   5   8 -11   -2.45    1.89
   5   8 -10   11.75    3.49
   5   8  -9    6.92    2.85
   5   8  -8    4.85    2.41
   5   8  -7   23.44    4.41
   5   8  -6   26.40    4.95
   5   8  -5  103.93    8.91
   5   8  -4   39.78    5.60
   5   8  -3   32.77    5.15
   5   8  -2   17.06    3.85
   5   8  -1    3.81    2.38
   5   8   0   88.63    6.53
   5   8   0   84.00    7.90
   5   8   1   13.10    2.69
  -5  -8  -1   13.53    1.00
   5   8   1   18.92    3.92
   5   8   2    1.22    1.19
   5   8   2    0.52    1.97
   5   8   3   48.72    6.29
   5   8   4   11.04    3.34
   5   8   5   19.57    4.22
   5   8   6   36.18    4.22
   5   8   6   35.58    5.78
   5   8   7    8.12    3.49
   5   8   8   14.19    4.22
   5   8   9   -3.33    3.03
   5   8  10    7.11    3.33
   5   8  11    3.54    2.70
   5   9 -16    7.66    3.63
   5   9 -15   -2.12    2.36
   5   9 -14   -2.31    2.93
   5   9 -13    0.57    2.04
   5   9 -12    1.52    2.26
   5   9 -11   -1.23    2.16
   5   9 -10   -1.29    2.32
   5   9  -9    0.51    1.89
   5   9  -8    9.93    3.14
   5   9  -7   -0.65    1.48
   5   9  -6    3.55    2.26
   5   9  -5   17.50    4.03
   5   9  -4   31.95    5.07
   5   9  -3   35.16    5.45
   5   9  -2   -0.86    2.18
   5   9  -1   29.97    5.08
   5   9   0   12.36    3.55
   5   9   1   10.18    3.17
   5   9   2   25.31    4.65
   5   9   3    3.98    2.66
   5   9   4   60.35    7.23
   5   9   5   17.52    4.25
   5   9   6   10.89    2.51
   5   9   6    9.92    3.49
   5   9   7   35.11    5.87
   5   9   8    9.97    3.23
   5   9   9    6.55    3.30
   5   9  10    2.48    2.46
   5  10 -14    8.77    3.50
   5  10 -13    2.34    2.23
   5  10 -12    3.67    2.83
   5  10 -11    2.53    2.26
   5  10 -10   11.74    3.77
   5  10  -9   -1.30    2.44
   5  10  -8    0.46    2.28
   5  10  -7   10.90    3.63
   5  10  -6   10.07    3.08
   5  10  -5   18.59    4.17
   5  10  -4   40.59    6.21
   5  10  -3    1.47    2.39
   5  10  -2   31.94    5.46
   5  10  -1    2.93    2.11
   5  10   0   21.22    4.62
   5  10   1   38.67    6.10
   5  10   2    0.91    2.22
   5  10   3    8.94    3.25
   5  10   4    4.48    2.94
   5  10   5    7.54    3.36
   5  10   6   16.63    4.51
   5  10   7    0.98    2.75
   5  10   8   23.33    5.04
   5  10   9    0.83    2.73
   5  11 -13   -7.00    3.57
   5  11 -12   -1.99    2.45
   5  11 -11    3.94    3.20
   5  11 -10    2.71    2.20
   5  11  -9    0.05    2.08
   5  11  -8    8.90    3.24
   5  11  -7    0.26    2.27
   5  11  -6    2.95    2.38
   5  11  -5   37.86    6.25
   5  11  -4    3.38    2.68
   5  11  -3   20.21    4.55
   5  11  -2    4.42    2.77
   5  11  -1   26.25    5.09
   5  11   0   44.35    6.48
   5  11   1    0.26    1.80
   5  11   2   43.49    6.42
   5  11   3    2.93    2.52
   5  11   4   27.05    5.26
   5  11   5   24.55    5.27
   5  11   6    1.26    2.31
   5  11   7   33.66    6.15
   5  11   8    0.02    2.25
   5  12 -11   -1.66    2.58
   5  12 -10   -0.41    2.40
   5  12  -9    3.60    2.52
   5  12  -8   -0.32    2.26
   5  12  -7    5.73    3.05
   5  12  -6   10.38    3.60
   5  12  -5   -2.93    2.88
   5  12  -4   11.11    4.23
   5  12  -3    1.13    2.07
   5  12  -2   13.07    3.62
   5  12  -1    6.94    3.26
   5  12   0   11.96    3.95
   5  12   1   24.97    5.11
   5  12   2    1.03    2.79
   5  12   3   15.56    4.18
   5  12   4    6.95    2.96
   5  12   5    3.60    2.74
   5  12   6    7.35    3.46
   5  13  -8   22.99    5.53
   5  13  -7    1.09    2.61
   5  13  -6    5.64    3.26
   5  13  -5   14.01    4.34
   5  13  -4   -0.28    2.16
   5  13  -3   12.96    4.38
   5  13  -2    1.91    2.19
   5  13  -1    0.88    2.40
   5  13   0   34.48    6.27
   5  13   1   -1.22    2.40
   5  13   2   23.41    5.25
   5  13   3    5.72    3.32
   5  13   4    7.38    3.00
   5  14  -4   -1.42    2.29
   5  14  -3    6.75    3.43
   5  14  -2   11.25    3.75
   5  14  -1    1.54    2.39
   5  14   0    3.04    3.01
   5  14   1   12.27    4.20
  -6  17   3    2.29    2.24
  -6  17   2   -2.72    2.21
  -6  17   1    3.22    2.49
  -6  17   0    2.33    2.27
  -6  17  -1    2.17    2.08
  -6  17  -2    5.47    1.96
  -6  17  -3    3.49    1.80
  -6  17  -4    7.60    3.23
  -6  16   4    6.62    2.53
  -6  16   3    4.88    2.48
  -6  16   2    6.66    2.60
  -6  16   1    8.49    3.12
  -6  16   0    4.27    2.27
  -6  16  -1    7.80    2.91
  -6  16  -2    0.39    1.80
  -6  16  -3    5.42    3.60
  -6  16  -3    4.76    2.80
  -6  16  -4    6.32    4.12
   6 -16   5    1.71    2.35
   6 -16   6   18.53    4.16
   6 -16   7    1.01    1.63
   6 -15  -6   -0.39    2.49
   6 -15  -5    1.63    1.96
   6 -15  -4   -0.63    1.97
  -6  15   4    2.24    2.50
  -6  15   3   -0.41    2.18
  -6  15   2    3.78    2.22
  -6  15   1    0.56    1.91
  -6  15   0   31.56    5.09
  -6  15  -1    6.22    2.49
  -6  15  -2    9.64    3.05
  -6  15  -3    8.01    3.66
   6 -15   3    3.57    2.19
  -6  15  -4   18.61    4.96
   6 -15   4    4.88    2.30
  -6  15  -5   18.48    5.06
   6 -15   5   21.33    4.33
  -6  15  -6    0.36    2.40
   6 -15   6    2.45    1.50
  -6  15  -7   21.38    5.13
   6 -15   7   25.29    5.08
  -6  15  -8    4.30    3.36
   6 -15   8    4.57    2.55
  -6  15  -9    6.17    2.78
   6 -14  -9    3.05    2.58
   6 -14  -8    2.33    2.09
   6 -14  -7    1.58    2.46
   6 -14  -6    0.18    2.48
   6 -14  -5   -2.26    2.00
  -6  14   5    0.20    1.74
   6 -14  -4    9.49    3.57
  -6  14   4    1.76    2.54
   6 -14  -3   13.32    3.85
  -6  14   3    9.47    3.21
  -6  14   2    4.32    2.19
  -6  14   1   13.56    3.71
   6 -14   0    5.29    1.91
  -6  14   0    5.87    2.99
   6 -14   1   24.78    3.89
  -6  14  -1   27.13    4.67
   6 -14   2   11.28    2.84
   6 -14   3   21.53    3.98
  -6  14  -4   40.77    6.63
   6 -14   4   29.72    4.78
  -6  14  -5    5.12    2.86
   6 -14   5    2.40    1.90
  -6  14  -6   46.09    6.81
   6 -14   6   32.54    5.36
  -6  14  -7   10.63    3.53
   6 -14   7   21.71    4.47
  -6  14  -8   15.46    4.48
   6 -14   8   12.27    3.74
  -6  14  -9   26.17    5.17
   6 -14   9   34.68    6.00
   6 -13 -11    1.04    1.94
   6 -13 -10    0.24    2.25
   6 -13  -9    4.35    2.59
   6 -13  -8    1.08    2.34
   6 -13  -7   -5.16    2.87
   6 -13  -6    2.43    2.41
  -6  13   6    1.51    1.88
   6 -13  -5    3.40    2.27
  -6  13   5    2.83    2.18
   6 -13  -4    5.97    2.94
  -6  13   4    4.77    2.44
   6 -13  -3   -2.12    2.56
  -6  13   3    1.26    1.91
   6 -13  -2   46.15    6.47
  -6  13   2   47.10    6.17
   6 -13  -1   -1.99    1.33
  -6  13   1    0.41    1.79
  -6  13   0   44.51    5.84
   6 -13   0   39.33    4.47
   6 -13   1   29.90    4.12
   6 -13   2   12.12    3.02
   6 -13   3   27.27    4.39
  -6  13  -4    4.70    2.79
   6 -13   4    3.98    2.24
  -6  13  -5   23.76    4.85
   6 -13   5   24.18    4.37
  -6  13  -6    1.68    2.03
   6 -13   6    0.16    1.55
  -6  13  -7   12.76    3.94
   6 -13   7   13.60    3.63
  -6  13  -8   31.33    5.55
   6 -13   8   25.56    4.96
  -6  13  -9    0.21    2.01
   6 -13   9   -1.28    2.04
   6 -13  10   29.59    5.60
   6 -12 -13    0.74    2.19
   6 -12 -12    0.23    2.35
   6 -12 -11    7.66    3.98
   6 -12 -10    4.07    2.88
   6 -12  -9    2.49    2.78
   6 -12  -8    2.85    2.25
   6 -12  -7    0.55    1.97
   6 -12  -6    3.54    2.56
  -6  12   6    7.84    2.83
   6 -12  -5    2.06    2.08
  -6  12   5   -1.08    2.05
   6 -12  -4    0.96    0.71
   6 -12  -4   -1.42    2.28
  -6  12   4   -0.27    1.71
   6 -12  -3   37.44    5.60
  -6  12   3   43.02    5.75
   6 -12  -3   42.74    3.58
   6 -12  -2    0.46    1.33
  -6  12   2    1.68    1.82
   6 -12  -1   45.90    4.43
   6 -12  -1   47.13    6.11
  -6  12   1   43.35    5.61
   6 -12   0   32.99    3.95
   6 -12   1   33.06    4.24
   6 -12   2   45.17    5.23
   6 -12   3   12.41    3.05
   6 -12   4   29.81    4.56
   6 -12   5   16.77    3.60
  -6  12  -6   28.18    5.13
   6 -12   6   16.47    3.82
  -6  12  -7   35.22    5.34
   6 -12   7   21.18    4.34
  -6  12  -8    1.43    2.37
   6 -12   8    1.73    2.14
  -6  12  -9   38.70    5.60
   6 -12   9   25.14    4.98
   6 -12  10    2.38    2.68
   6 -12  11    6.09    3.18
   6 -11 -14    6.39    3.45
   6 -11 -13    2.22    2.77
   6 -11 -12    0.81    2.76
   6 -11 -11    5.67    3.07
   6 -11 -10    5.08    2.72
   6 -11  -9   30.74    5.52
   6 -11  -8   -1.06    1.84
   6 -11  -7    5.97    2.58
  -6  11   7    3.21    2.02
   6 -11  -6    7.65    2.95
  -6  11   6    5.25    2.56
   6 -11  -5   10.71    1.29
   6 -11  -5    4.42    2.53
  -6  11   5    8.44    2.99
   6 -11  -4   22.49    4.34
  -6  11   4   22.07    4.10
   6 -11  -4   22.58    2.33
   6 -11  -3   -1.21    1.89
  -6  11   3    2.80    1.46
   6 -11  -3    1.84    1.13
  -6  11   3    0.67    0.62
   6 -11  -2   34.53    5.01
  -6  11   2   32.38    4.91
  -6  11   2   40.70    3.40
   6 -11  -1   11.59    3.19
  -6  11   1   12.29    3.00
  -6  11   1   14.35    2.36
   6 -11  -1   14.65    2.88
   6 -11   0   60.18    5.38
  -6  11   0   69.62    5.31
   6 -11   1   59.96    5.60
  -6  11  -1   60.02    5.39
   6 -11   2    0.89    1.34
   6 -11   3  176.68   10.35
   6 -11   4    4.52    2.21
   6 -11   5   27.85    4.61
   6 -11   6   31.84    5.14
   6 -11   7    3.61    2.24
   6 -11   8   45.05    6.34
   6 -11   9    2.53    2.28
   6 -11  10   21.31    4.72
   6 -11  11    6.48    3.34
   6 -10 -15    3.33    3.19
   6 -10 -14   -0.17    2.40
   6 -10 -13   13.29    4.37
   6 -10 -12    4.62    2.77
   6 -10 -11    3.23    2.90
   6 -10 -10   12.22    3.29
   6 -10  -9    7.40    2.86
   6 -10  -8   79.97    7.96
   6 -10  -7   -0.09    1.88
  -6  10   7    0.31    1.55
   6 -10  -6   63.92    6.87
  -6  10   6   60.99    6.54
   6 -10  -6   54.13    1.96
   6 -10  -5    4.41    2.25
  -6  10   5    1.62    1.60
   6 -10  -5    2.39    0.82
  -6  10   4    3.32    0.74
   6 -10  -4    5.36    2.46
  -6  10   4    2.88    2.04
   6 -10  -4    3.26    1.12
   6 -10  -3   64.61    6.59
   6 -10  -3   64.67    4.47
  -6  10   3   67.49    6.65
  -6  10   3   70.28    3.98
   6 -10  -2   23.61    3.96
  -6  10   2   27.77    4.36
  -6  10   2   20.62    2.46
   6 -10  -1   28.20    4.29
  -6  10   1   30.59    3.38
   6 -10   0  131.65    8.78
   6 -10   0  147.67    8.15
  -6  10   0  137.57    7.41
   6 -10   1   12.09    2.84
  -6  10  -1    9.61    2.49
   6 -10   2  100.40    7.36
  -6  10  -2   93.84    6.92
   6 -10   3    6.47    2.19
   6 -10   4   57.46    6.09
   6 -10   5   39.51    5.43
   6 -10   6   10.06    3.26
   6 -10   7   95.34    8.73
   6 -10   8    9.79    3.25
   6 -10   9   18.57    4.42
   6 -10  10   21.33    4.60
   6 -10  11   14.62    3.79
   6 -10  12    7.63    3.07
   6  -9 -16   12.64    4.00
   6  -9 -15   10.89    4.20
   6  -9 -14   10.23    3.90
   6  -9 -13   -3.17    3.11
   6  -9 -12    2.59    2.96
   6  -9 -11    4.14    3.11
   6  -9 -10    0.83    1.96
   6  -9  -9    1.17    2.28
   6  -9  -8   -1.00    2.03
   6  -9  -7    2.17    2.00
  -6   9   7    3.78    2.41
   6  -9  -6   57.16    6.25
   6  -9  -6   56.24    2.75
  -6   9   6   53.24    6.03
   6  -9  -5   42.26    5.30
   6  -9  -5   39.02    2.84
  -6   9   5   41.45    5.21
   6  -9  -4  134.98    9.11
   6  -9  -4  126.84    5.76
  -6   9   4  133.52    9.19
  -6   9   4  132.24    4.80
  -6   9   3    5.46    1.31
   6  -9  -3    2.66    1.94
  -6   9   3    4.84    1.96
   6  -9  -3    2.93    1.27
   6  -9  -2  147.96    9.09
  -6   9   2  133.29    6.32
   6  -9  -1   99.09    7.38
  -6   9   1   94.39    5.73
   6  -9   0   30.62    4.15
   6  -9   0   37.08    4.27
  -6   9   0   36.97    3.94
  -6   9  -1  147.19    8.82
   6  -9   1  129.58    8.03
  -6   9  -1  132.44    7.74
  -6   9  -2   16.50    3.17
   6  -9   2   16.30    3.22
  -6   9  -2   13.55    2.86
  -6   9  -3  197.15    9.99
   6  -9   3  190.88   10.46
  -6   9  -4   11.67    2.46
   6  -9   4   16.57    3.53
  -6   9  -5   40.61    4.57
   6  -9   5   42.33    5.40
  -6   9  -6   55.33    5.29
   6  -9   6   53.37    6.29
   6  -9   7   -2.04    1.59
   6  -9   8   64.62    7.41
   6  -9   9   22.20    4.83
   6  -9  10    9.35    3.36
   6  -9  11   21.90    4.80
   6  -9  12    0.76    2.12
   6  -8 -17   -1.31    2.09
  -6   8  17   -2.15    2.97
   6  -8 -16    3.93    2.65
   6  -8 -15    7.95    3.68
   6  -8 -14    2.39    2.42
   6  -8 -13    0.98    2.09
   6  -8 -12   14.22    4.03
   6  -8 -11    9.87    3.20
   6  -8 -10   14.93    3.95
   6  -8  -9  100.55    8.72
   6  -8  -8    1.68    1.88
   6  -8  -7   -0.67    1.77
   6  -8  -7    0.80    0.52
  -6   8   7   -0.11    1.60
   6  -8  -7    0.27    0.35
   6  -8  -6    1.70    1.84
  -6   8   6    0.10    1.59
   6  -8  -6    1.83    0.83
   6  -8  -5   64.14    6.13
  -6   8   5   65.24    6.31
   6  -8  -5   72.25    4.13
  -6   8   5   76.58    3.32
   6  -8  -4    5.80    1.46
  -6   8   4    6.46    1.31
   6  -8  -4    5.13    2.09
  -6   8   4    5.40    2.06
  -6   8   3  146.75    9.13
   6  -8  -3  122.12    8.09
  -6   8   3  133.91    8.87
  -6   8   3  132.36    5.88
   6  -8  -3  127.20    6.39
  -6   8   2   76.38    6.46
   6  -8  -2   63.55    5.72
  -6   8   2   67.09    4.61
  -6   8   1  112.49    7.60
   6  -8  -1  112.42    7.32
  -6   8   1  102.95    6.06
  -6   8   0  141.31    8.36
   6  -8   0  133.43    7.83
  -6   8   0  145.38    7.59
   6  -8   0  128.55    7.57
   6  -8   1   15.93    3.12
  -6   8  -1   23.34    3.56
  -6   8  -1   19.72    3.04
  -6   8  -2  126.01    7.59
  -6   8  -2  113.91    7.47
   6  -8   2  103.93    7.48
  -6   8  -3  111.09    7.03
   6  -8   3   76.98    6.79
  -6   8  -4    3.46    1.49
   6  -8   4    9.64    2.98
  -6   8  -5   63.62    5.33
   6  -8   5   63.99    6.59
  -6   8  -6   -1.13    1.21
   6  -8   6   -1.35    2.18
  -6   8  -7   94.04    6.41
   6  -8   7   92.46    8.39
   6  -8   8   29.95    5.10
   6  -8   9    4.97    2.50
   6  -8  10   34.85    5.89
   6  -8  11   -3.00    3.50
   6  -8  12   19.75    4.90
   6  -8  13   -0.27    1.99
  -6   7  17    4.05    3.01
   6  -7 -17    1.57    2.18
   6  -7 -16    6.03    3.61
   6  -7 -15   -0.55    1.72
   6  -7 -14    7.46    3.09
   6  -7 -13    5.90    3.27
   6  -7 -12    4.70    2.83
   6  -7 -11    4.84    3.01
   6  -7 -10   44.50    5.85
   6  -7  -9    0.22    1.99
   6  -7  -9    0.42    0.33
   6  -7  -9    0.08    0.30
   6  -7  -8   52.19    2.73
   6  -7  -8   44.25    5.51
  -6   7   8   51.27    5.76
   6  -7  -8   49.12    2.56
   6  -7  -7    1.44    0.85
  -6   7   7    3.47    1.99
   6  -7  -7    1.36    1.87
   6  -7  -7    1.11    0.51
   6  -7  -6  108.06    7.94
   6  -7  -6  122.50    5.24
  -6   7   6  130.97    8.80
   6  -7  -5   19.83    2.36
   6  -7  -5   11.43    2.84
  -6   7   5   15.80    1.77
  -6   7   5    9.16    2.52
   6  -7  -4   93.12    6.85
   6  -7  -4  104.40    5.58
  -6   7   4  101.23    7.58
  -6   7   4  109.33    5.08
  -6   7   3  144.14    8.71
   6  -7  -3  130.90    7.85
  -6   7   3  136.07    8.63
  -6   7   3  136.61    6.18
  -6   7   2    5.39    2.07
   6  -7  -2    5.94    2.02
  -6   7   2    6.82    1.61
  -6   7   1  202.95    9.50
   6  -7  -1  180.69    8.64
   6  -7  -1  197.28   10.01
  -6   7   1  195.18    8.33
  -6   7   0   17.35    2.91
   6  -7   0   14.91    2.57
   6  -7   0   17.24    3.10
   6  -7   0   15.40    2.96
  -6   7   0   14.46    2.56
  -6   7  -1  176.37    8.45
   6  -7   1  181.98    9.38
  -6   7  -1  190.21    9.12
   6  -7   1  182.96    9.40
  -6   7  -2   10.03    2.30
   6  -7   2    7.69    2.43
  -6   7  -2    8.75    2.44
  -6   7  -3  115.44    6.58
   6  -7   3  111.58    7.96
  -6   7  -4   44.14    4.12
   6  -7   4   38.50    4.93
   6  -7   5   48.99    5.84
  -6   7  -5   50.22    4.34
  -6   7  -6   86.11    5.64
   6  -7   6   91.40    7.95
  -6   7  -7   22.04    2.82
   6  -7   7   31.81    5.17
   6  -7   8    1.55    2.15
   6  -7   9   64.18    7.33
   6  -7  10    3.35    2.94
   6  -7  11    4.60    2.66
   6  -7  12    2.50    2.44
   6  -7  13   15.75    4.50
   6  -6 -18   -0.58    2.38
  -6   6  18   -1.65    2.37
   6  -6 -17    3.02    3.09
  -6   6  17    2.72    2.57
   6  -6 -16    7.43    3.62
   6  -6 -15    0.86    2.95
   6  -6 -14   -0.10    2.21
   6  -6 -13    2.22    0.83
   6  -6 -13    1.67    2.41
   6  -6 -12   15.14    1.53
   6  -6 -12   15.55    1.48
   6  -6 -12   14.85    3.88
   6  -6 -11   15.39    3.88
   6  -6 -11   16.89    1.62
   6  -6 -11   14.23    1.37
   6  -6 -10    8.99    2.96
   6  -6 -10    8.88    1.25
   6  -6 -10    8.63    1.08
   6  -6  -9   43.62    5.62
   6  -6  -9   44.54    2.46
   6  -6  -9   47.71    2.89
   6  -6  -8    3.15    0.90
   6  -6  -8    4.51    2.46
  -6   6   8    2.88    1.49
   6  -6  -8    3.09    0.79
   6  -6  -7   78.95    6.94
  -6   6   7   62.74    6.10
   6  -6  -7   72.94    3.61
   6  -6  -6    0.33    1.56
  -6   6   6   -0.86    0.79
  -6   6   6   -0.75    1.68
   6  -6  -6    0.90    0.94
   6  -6  -5  203.83   10.00
  -6   6   5  187.29   10.11
  -6   6   5  175.02    6.27
   6  -6  -4  123.91    7.54
  -6   6   4  129.93    8.28
   6  -6  -4  131.22    6.48
  -6   6   4  130.93    5.90
  -6   6   3    3.86    1.22
   6  -6  -3   -0.21    1.52
   6  -6  -2  343.93   11.56
   6  -6  -2  331.51   12.77
  -6   6   2  341.97   10.64
  -6   6   2  337.20   11.91
  -6   6   1   20.33    3.10
   6  -6  -1   19.94    2.81
   6  -6  -1   19.89    3.19
  -6   6   1   22.25    2.92
  -6   6   0  232.07    9.27
   6  -6   0  246.62    9.11
   6  -6   0  252.16   10.57
   6  -6   0  255.25   10.76
  -6   6   0  253.81   10.16
  -6   6  -1  219.74    8.71
   6  -6   1  230.83    8.58
   6  -6   1  237.60   10.67
   6  -6   1  233.61   10.10
  -6   6  -1  243.68   10.40
  -6   6  -2   30.71    3.27
   6  -6   2   27.98    3.52
  -6   6  -2   34.53    4.32
   6  -6   2   26.56    3.98
  -6   6  -3  126.71    6.27
   6  -6   3  140.62    8.91
  -6   6  -4   11.38    2.10
   6  -6   4    9.93    2.91
  -6   6  -5   84.12    5.04
   6  -6   5   82.55    7.39
  -6   6  -6   27.87    2.98
   6  -6   6   19.55    4.15
  -6   6  -7  115.85    5.88
   6  -6   7  120.03    9.38
   6  -6   8   19.45    4.18
  -6   6  -8   24.45    2.81
   6  -6   9   -0.19    1.92
   6  -6  10   12.75    3.55
   6  -6  11   -2.38    2.86
   6  -6  12    4.22    3.08
   6  -6  13    2.72    2.47
   6  -6  14    2.19    3.35
   6  -5 -19   -1.09    3.79
  -6   5  19   -7.16    3.20
   6  -5 -18    1.35    2.32
  -6   5  18    5.29    2.73
   6  -5 -17   -1.37    3.01
  -6   5  17   -0.55    2.15
   6  -5 -16    4.79    3.77
   6  -5 -15    3.20    2.50
   6  -5 -15    3.95    1.33
   6  -5 -14   -2.82    3.11
   6  -5 -14   -0.56    0.78
   6  -5 -13    4.08    2.94
   6  -5 -13    1.87    0.89
   6  -5 -13    3.47    1.08
   6  -5 -12    5.51    1.31
   6  -5 -12    3.36    1.02
   6  -5 -11    6.71    1.31
   6  -5 -11   10.51    3.61
   6  -5 -11    8.89    1.60
   6  -5 -10   24.30    4.64
   6  -5 -10   26.36    2.44
   6  -5 -10   26.96    2.47
   6  -5  -9    4.30    1.98
   6  -5  -9    6.06    1.27
   6  -5  -9    5.30    1.24
   6  -5  -8   24.43    4.06
  -6   5   8   33.55    4.46
   6  -5  -8   28.87    2.59
   6  -5  -8   26.49    2.56
   6  -5  -7   12.21    3.03
  -6   5   7   13.88    3.06
   6  -5  -7    9.72    1.63
   6  -5  -6  131.28    8.09
  -6   5   6  138.64    5.76
  -6   5   6  149.62    8.88
   6  -5  -6  149.35    6.03
   6  -5  -5   64.76    5.59
  -6   5   5   65.33    5.90
   6  -5  -5   64.76    4.25
  -6   5   5   64.86    4.18
   6  -5  -4   49.67    4.67
  -6   5   4   56.69    5.37
   6  -5  -4   59.29    4.25
  -6   5   4   49.88    3.89
   6  -5  -3  163.34    7.83
   6  -5  -3  167.05    9.06
   6  -5  -3  169.41    7.48
  -6   5   3  175.43    7.48
  -6   5   2    4.03    1.47
   6  -5  -2    1.81    1.06
   6  -5  -2    6.31    2.29
   6  -5  -1  219.17    8.24
   6  -5  -1  220.44    9.84
  -6   5   1  203.68    8.79
  -6   5   0  227.07    8.45
   6  -5   0  213.22    7.79
   6  -5   0  222.98    9.68
   6  -5   0  220.44   10.02
  -6   5   0  212.30    9.42
  -6   5  -1  204.15    7.64
   6  -5   1  191.46    7.11
   6  -5   1  182.78    9.50
   6  -5   1  186.21    8.62
  -6   5  -1  181.29    8.97
   6  -5   2  251.68   11.53
   6  -5   2  263.27    9.94
  -6   5  -2  272.35    8.43
  -6   5  -2  291.99   11.92
  -6   5  -3    8.32    1.64
   6  -5   3    6.40    2.77
   6  -5   3    6.65    1.62
  -6   5  -4  350.03    9.00
   6  -5   4  360.08   14.60
  -6   5  -5   47.36    3.29
   6  -5   5   43.30    5.37
  -6   5  -6   11.86    1.68
   6  -5   6    9.56    2.83
  -6   5  -7   47.00    3.30
   6  -5   7   46.25    6.03
  -6   5  -8    2.28    0.92
   6  -5   8   -0.93    2.48
   6  -5   9    1.27    1.94
   6  -5  10    1.51    2.35
   6  -5  11    3.40    2.65
   6  -5  12    3.40    3.05
   6  -5  13    6.03    2.87
   6  -5  14    3.18    3.06
   6  -4 -19    8.50    4.72
  -6   4  19   -1.86    2.53
   6  -4 -18   -1.94    2.58
  -6   4  18    0.73    1.61
   6  -4 -17    4.84    3.90
  -6   4  17    0.47    1.57
   6  -4 -16    1.59    2.51
   6  -4 -16    1.70    1.13
   6  -4 -15   -0.35    2.71
   6  -4 -14    9.60    4.02
   6  -4 -14    5.75    1.58
   6  -4 -13    5.95    1.58
   6  -4 -13   10.80    4.10
   6  -4 -12   18.66    4.21
   6  -4 -12   11.71    2.07
   6  -4 -12   16.64    2.24
   6  -4 -11    1.67    2.95
   6  -4 -11    1.03    1.15
   6  -4 -11    2.02    1.04
   6  -4 -10    3.56    2.92
   6  -4 -10    4.10    1.36
   6  -4 -10    3.17    1.03
   6  -4  -9   70.18    6.81
   6  -4  -9   68.98    4.46
   6  -4  -9   65.48    4.27
   6  -4  -8    0.50    0.89
   6  -4  -8   -0.01    1.85
  -6   4   8   -0.30    1.30
   6  -4  -8    1.97    0.95
   6  -4  -7  130.23    8.29
  -6   4   7  131.10    8.20
   6  -4  -7  129.99    6.07
   6  -4  -6    7.79    2.42
  -6   4   6    9.43    1.74
  -6   4   6    8.78    2.31
   6  -4  -6    8.33    1.72
   6  -4  -5   35.41    3.96
  -6   4   5   36.03    4.25
   6  -4  -5   33.76    3.35
  -6   4   5   37.20    3.40
   6  -4  -4  194.38    8.59
  -6   4   4  188.15    9.36
   6  -4  -4  198.23    7.98
  -6   4   4  200.65    8.05
   6  -4  -3   49.16    4.18
  -6   4   3   59.49    4.53
   6  -4  -2  294.43    9.36
  -6   4   2  289.52   10.33
   6  -4  -1   48.79    3.65
  -6   4   1   55.62    4.82
   6  -4   0  234.43    7.36
   6  -4   0  231.54    9.60
  -6   4   0  253.92   10.41
   6  -4   1  337.91    8.20
   6  -4   1  350.19   11.27
  -6   4  -1  359.12   12.78
   6  -4   1  331.55   12.86
   6  -4   2   23.29    2.93
   6  -4   2   28.17    4.16
  -6   4  -2   30.41    4.05
  -6   4  -3  308.61    7.29
   6  -4   3  283.39   12.66
   6  -4   3  305.71    9.85
  -6   4  -4   35.55    2.39
   6  -4   4   33.67    4.80
  -6   4  -5  237.99    5.80
   6  -4   5  223.20   12.02
  -6   4  -6   41.41    2.43
   6  -4   6   42.14    5.65
   6  -4   7    2.48    2.37
  -6   4  -7    7.30    1.11
  -6   4  -8   26.75    2.07
   6  -4   8   21.60    4.19
   6  -4   9   10.48    3.02
   6  -4  10    2.27    2.63
   6  -4  11    2.46    2.80
   6  -4  12    1.87    1.73
   6  -4  13    0.50    2.44
   6  -4  14   -2.00    2.90
   6  -3 -19   10.66    4.95
  -6   3  19   -0.81    2.44
   6  -3 -18    5.22    3.36
  -6   3  18    1.00    1.60
   6  -3 -17    0.51    1.06
  -6   3  17   -1.39    2.02
   6  -3 -16    1.42    1.23
  -6   3  16    3.57    2.50
   6  -3 -15    3.55    1.60
   6  -3 -14    0.05    1.05
   6  -3 -14   -0.62    1.35
   6  -3 -13    3.56    1.50
   6  -3 -12   22.56    2.90
   6  -3 -11   10.06    1.97
   6  -3 -10    5.40    1.36
   6  -3  -9    0.06    1.01
   6  -3  -9    0.04    0.92
   6  -3  -9    2.85    2.91
   6  -3  -8   93.03    7.37
  -6   3   8   76.38    6.32
   6  -3  -8   86.86    5.28
   6  -3  -8   78.12    5.10
   6  -3  -7    5.47    2.72
   6  -3  -7    2.93    1.39
  -6   3   7    1.42    1.34
   6  -3  -7    1.82    1.07
   6  -3  -6   90.70    6.58
  -6   3   6   93.76    5.53
  -6   3   6   92.11    6.69
   6  -3  -6  100.65    5.85
   6  -3  -5  142.97    7.70
  -6   3   5  156.49    7.23
  -6   3   5  158.98    8.49
   6  -3  -4    0.95    1.42
  -6   3   4    1.88    1.27
  -6   3   4    1.25    1.44
   6  -3  -3   61.90    4.44
  -6   3   3   59.71    4.74
   6  -3  -2   75.47    4.53
  -6   3   2   75.02    5.43
   6  -3  -1  208.81    6.78
  -6   3   1  222.65    9.62
   6  -3   0  272.75    6.94
   6  -3   0  268.03   11.05
  -6   3   0  274.94   11.07
   6  -3   1    0.61    1.54
  -6   3  -1    0.67    1.55
   6  -3   2  216.96    8.33
   6  -3   2  243.68   11.26
  -6   3  -2  237.09   10.99
   6  -3   3    3.32    2.42
   6  -3   3    3.22    1.36
   6  -3   4   98.22    5.01
   6  -3   4  106.25    8.25
   6  -3   5   22.51    4.02
   6  -3   6   34.06    4.97
   6  -3   7   64.95    7.05
   6  -3   8    3.42    2.54
   6  -3   9   12.33    3.64
   6  -3  10   -3.88    2.92
   6  -3  11   -0.37    1.85
   6  -3  12    3.77    2.93
   6  -3  13    2.32    2.37
   6  -3  14    0.64    2.13
  -6   2  20    1.30    2.17
   6  -2 -19    6.61    2.35
  -6   2  19    5.30    2.90
   6  -2 -18    0.28    1.55
  -6   2  18   -1.13    2.08
   6  -2 -17    8.97    2.61
  -6   2  17    8.90    3.30
   6  -2 -16    3.59    1.85
  -6   2  16   -2.91    2.34
   6  -2 -15    6.52    2.22
   6  -2 -15   10.11    2.49
   6  -2 -14   11.52    2.59
   6  -2 -14   14.59    2.61
   6  -2 -13    9.35    2.23
   6  -2 -13    6.25    1.86
   6  -2 -12    4.44    1.59
   6  -2 -12    3.45    1.43
   6  -2 -11    7.79    2.00
   6  -2 -10   -0.09    0.94
   6  -2  -9   65.14    4.89
   6  -2  -8   27.20    3.20
  -6   2   7  109.03    7.11
   6  -2  -7  116.81    6.46
  -6   2   6   38.61    3.82
  -6   2   6   43.77    4.50
  -6   2   5    4.36    1.46
  -6   2   5    2.77    1.69
   6  -2  -4  258.30    9.40
  -6   2   4  287.41   10.89
  -6   2   4  284.99   10.50
   6  -2  -3    8.21    1.89
  -6   2   3    3.34    1.46
   6  -2  -2  138.39    5.72
  -6   2   2  135.04    7.53
   6  -2  -1  248.79    6.80
   6  -2  -1  233.40   10.21
  -6   2   1  257.47   10.63
  -6   2   0    1.83    0.88
   6  -2   0    1.78    0.70
   6  -2   0    3.26    2.10
   6  -2   1  189.62    9.85
  -6   2  -1  202.83    9.97
   6  -2   2   68.80    6.20
  -6   2  -2   70.07    6.12
   6  -2   3   93.04    5.04
   6  -2   3   92.76    7.31
   6  -2   4   67.85    6.53
   6  -2   4   62.23    3.79
   6  -2   5   36.06    2.58
   6  -2   5   44.35    5.67
   6  -2   6   72.00    7.25
   6  -2   7    3.53    2.84
   6  -2   8   27.54    4.95
   6  -2   9    7.97    3.15
   6  -2  10    6.65    3.15
   6  -2  11   -0.81    2.76
   6  -2  12   -1.70    2.26
   6  -2  13    0.43    2.42
   6  -2  14    4.47    2.92
   6  -1 -20    3.51    2.35
  -6   1  20   -0.07    2.61
   6  -1 -19   -3.44    2.04
  -6   1  19   -1.01    2.00
   6  -1 -18   -2.54    1.91
  -6   1  18    0.31    1.65
   6  -1 -17   -0.70    1.60
  -6   1  17    0.43    2.24
   6  -1 -16    1.83    1.69
  -6   1  16    2.07    1.59
   6  -1 -15    0.10    1.18
  -6   1  15    2.85    2.15
   6  -1 -14    1.71    1.47
   6  -1 -13   32.24    4.10
   6  -1 -13   31.28    4.00
   6  -1 -12   44.31    4.64
   6  -1 -12   46.97    4.69
   6  -1 -11    7.88    2.17
   6  -1 -11    1.37    1.33
   6  -1 -10  128.97    7.32
   6  -1 -10  123.48    7.46
   6  -1  -9   79.97    5.70
   6  -1  -8   17.40    2.75
  -6   1   7   49.02    4.70
   6  -1  -7   43.05    4.25
  -6   1   6  111.92    6.73
  -6   1   6   98.39    6.46
  -6   1   5  106.22    6.59
  -6   1   5  110.92    6.63
  -6   1   4   -0.67    1.08
  -6   1   4    1.42    1.46
  -6   1   3  149.73    8.07
   6  -1  -2   82.96    4.41
   6  -1  -2   83.83    6.23
  -6   1   2   84.61    6.19
   6  -1  -1   28.28    2.21
  -6   1   1   33.27    4.01
   6  -1  -1   28.46    3.82
   6  -1   0  306.39    5.52
   6  -1   0  329.11   12.69
  -6   1   0  337.54   12.81
   6  -1   1   84.49    6.77
  -6   1  -1   82.86    6.59
   6  -1   2  153.02    9.27
   6  -1   3  188.88   10.62
   6  -1   4    8.42    1.49
   6  -1   4    5.87    2.39
   6  -1   5   81.34    7.44
   6  -1   5   92.64    3.85
   6  -1   6   10.58    3.18
   6  -1   7   13.21    3.53
   6  -1   8   12.95    3.70
   6  -1   9    2.13    2.47
   6  -1  10    1.29    2.28
   6  -1  11    4.40    2.79
   6  -1  12    0.03    2.64
   6  -1  13    0.21    2.68
   6  -1  14   -2.85    2.47
  -6   0  20    1.50    2.55
   6   0 -19    1.86    1.75
  -6   0  19    0.80    1.77
   6   0 -18   -1.70    1.77
  -6   0  18    1.45    1.91
   6   0 -17   -1.40    1.82
  -6   0  17   -8.24    3.05
   6   0 -16   -1.21    1.98
  -6   0  16   -0.18    1.73
   6   0 -15   -1.35    1.65
  -6   0  15    1.32    1.66
   6   0 -14    6.18    2.28
   6   0 -13    7.39    2.15
   6   0 -12    0.36    1.21
   6   0 -11   73.29    5.94
   6   0 -11   71.55    6.12
   6   0 -10   16.76    2.79
   6   0 -10   16.61    3.01
   6   0 -10   16.73    2.91
   6   0  -9   60.05    5.20
   6   0  -9   61.93    5.46
   6   0  -8   82.23    6.10
   6   0  -8   94.38    6.67
  -6   0   7   49.99    4.60
   6   0  -7   54.58    4.86
   6   0  -7   50.86    4.90
  -6   0   6  182.49    8.96
  -6   0   6  171.62    8.16
   6   0  -6  187.82    9.24
   6   0  -5    2.05    1.34
  -6   0   5    2.97    1.37
  -6   0   5    2.01    1.36
  -6   0   4   91.49    6.47
  -6   0   4   91.52    5.76
   6   0  -4   95.90    6.68
  -6   0   3   34.06    4.05
   6   0  -3   28.12    3.76
  -6   0   2   36.29    4.29
   6   0  -2   26.22    3.70
   6   0  -1  103.34    7.24
  -6   0   1  103.79    7.20
   6   0   0   65.79    2.42
   6   0   0   57.27    5.56
  -6   0   0   68.18    5.99
   6   0   1  107.94    7.73
   6   0   2   38.52    4.91
   6   0   3   24.10    4.15
   6   0   4  160.89   10.20
   6   0   5   35.21    2.40
   6   0   5   45.13    5.72
   6   0   6   94.41    8.28
   6   0   7   15.43    3.98
   6   0   8   -1.35    2.19
   6   0   9   -0.13    2.36
   6   0  10   12.41    3.91
   6   0  11    1.53    2.37
   6   0  12   -2.68    2.72
   6   0  13   -4.41    2.96
   6   0  14    1.18    2.58
  -6  -1  21    2.11    2.70
  -6  -1  20    0.11    2.11
   6   1 -19   -1.19    2.21
  -6  -1  19    5.84    3.15
   6   1 -18    4.66    2.25
  -6  -1  18    3.73    2.36
   6   1 -17   -0.97    1.74
  -6  -1  17    0.14    1.74
   6   1 -16    9.60    2.87
  -6  -1  16   11.00    3.26
   6   1 -15   10.17    2.98
  -6  -1  15   13.33    3.46
   6   1 -14    2.92    1.73
  -6  -1  14    0.48    1.67
   6   1 -13    9.11    2.43
   6   1 -12    6.63    2.25
   6   1 -11    7.33    2.50
   6   1 -11    6.85    1.99
   6   1 -10  130.28    7.65
   6   1 -10  133.21    8.47
   6   1  -9   31.39    4.08
   6   1  -9   33.46    4.31
   6   1  -8    5.71    2.00
   6   1  -8    3.13    2.00
   6   1  -7  193.63    9.54
   6   1  -7  189.87    9.77
   6   1  -6   31.06    4.08
  -6  -1   6   25.72    3.17
   6   1  -6   25.78    3.60
  -6  -1   5  367.58   13.30
  -6  -1   5  343.03   10.88
   6   1  -5  347.72   13.09
  -6  -1   4   46.37    3.96
   6   1  -4   47.11    4.96
   6   1  -3   43.24    4.83
  -6  -1   3   39.12    4.58
   6   1  -2  121.68    7.95
  -6  -1   2  128.84    8.08
  -6  -1   1   16.53    3.23
   6   1  -1   13.74    2.86
   6   1   0    7.19    2.41
   6   1   1   71.39    6.47
   6   1   2   15.36    3.56
   6   1   3   59.83    6.30
   6   1   4    5.35    2.44
   6   1   5  116.95    9.10
   6   1   6    0.07    0.23
   6   1   6   -1.55    2.31
   6   1   7   21.45    4.18
   6   1   8   27.44    4.88
   6   1   9   -0.50    2.50
   6   1  10    1.37    2.65
   6   1  11   -2.07    2.47
   6   1  12    3.08    2.75
   6   1  13    3.61    2.70
   6   1  14   -0.02    2.18
  -6  -2  21    1.82    2.45
  -6  -2  20    1.00    2.25
   6   2 -19   -1.50    1.90
  -6  -2  19   -0.50    2.24
   6   2 -18    1.11    1.68
  -6  -2  18    2.99    2.26
   6   2 -17    2.69    2.11
  -6  -2  17    4.05    2.31
   6   2 -16   18.12    3.83
  -6  -2  16   15.35    3.66
   6   2 -15    0.43    1.70
  -6  -2  15   -0.08    1.52
   6   2 -14   15.71    3.36
  -6  -2  14   13.56    3.25
   6   2 -13    2.14    1.43
  -6  -2  13    3.00    1.74
   6   2 -12    1.73    1.70
   6   2 -11   11.32    2.96
   6   2 -11    9.00    2.17
   6   2 -10  114.77    8.28
   6   2  -9   49.28    5.36
   6   2  -8  264.77   12.15
   6   2  -7   32.25    4.34
  -6  -2   6  309.66   10.03
   6   2  -6  304.00   12.81
  -6  -2   5   38.23    3.54
   6   2  -5   39.22    4.76
  -6  -2   4  131.42    6.36
   6   2  -4  144.37    8.82
  -6  -2   3   23.39    2.70
   6   2  -3   23.09    3.87
   6   2  -2    8.36    2.56
   6   2  -1   86.78    7.11
   6   2   0   48.10    2.62
   6   2   0   47.72    5.45
   6   2   1    5.65    0.73
   6   2   1    9.39    2.81
   6   2   2    2.47    1.92
   6   2   3    0.39    1.61
   6   2   4   14.36    3.39
   6   2   5    6.35    2.94
   6   2   6    9.22    3.32
   6   2   7    7.08    3.39
   6   2   8    9.66    3.34
   6   2   9   11.67    3.68
   6   2  10    3.70    3.04
   6   2  11   -0.25    2.29
   6   2  12    2.16    1.96
   6   2  13   -0.78    2.24
   6   2  14   -0.91    2.72
   6   3 -21    1.75    1.61
   6   3 -20   -3.77    2.61
  -6  -3  20   -1.90    2.38
   6   3 -19    3.00    1.81
  -6  -3  19    8.83    3.32
   6   3 -18    5.46    2.87
  -6  -3  18    1.80    2.07
   6   3 -17    2.47    1.92
  -6  -3  17    1.58    1.77
   6   3 -16    2.44    2.03
  -6  -3  16   -0.23    1.61
   6   3 -15    8.30    2.99
  -6  -3  15    5.37    2.41
   6   3 -14    7.73    2.72
  -6  -3  14    6.24    2.31
   6   3 -13   12.61    3.40
  -6  -3  13    5.83    2.04
  -6  -3  12   47.69    4.99
   6   3 -12   50.30    5.98
   6   3 -12   48.35    4.85
   6   3 -11    1.70    1.85
   6   3 -11    0.74    1.04
   6   3 -10  175.21   10.53
   6   3  -9    3.15    2.17
   6   3  -8    4.58    2.18
   6   3  -7  249.13   12.13
   6   3  -6   53.22    5.68
  -6  -3   5   66.55    4.32
   6   3  -5   78.95    6.84
  -6  -3   4  171.88    6.83
   6   3  -4  158.36    9.59
   6   3  -3    5.37    2.21
  -6  -3   3    3.93    1.18
   6   3  -2  116.54    8.36
   6   3  -1   12.12    3.29
   6   3   0    1.63    0.79
   6   3   0   -0.35    2.17
   6   3   1   40.98    2.48
   6   3   1   35.32    5.03
   6   3   2   -0.59    0.44
   6   3   2   -1.20    1.93
   6   3   3   59.66    6.61
   6   3   4    6.06    2.80
   6   3   5   15.91    3.80
   6   3   6   32.82    5.25
   6   3   7   -0.58    2.21
   6   3   8    4.97    2.35
   6   3   9    3.19    2.90
   6   3  10   -2.70    2.77
   6   3  11    5.12    3.11
   6   3  12    5.16    3.36
   6   3  13    1.08    2.72
   6   3  14    1.28    2.67
   6   4 -20    0.37    1.84
   6   4 -19    2.53    2.08
   6   4 -18   10.48    3.44
  -6  -4  18   15.73    3.77
   6   4 -17    4.85    2.13
  -6  -4  17   -1.77    1.88
   6   4 -16   20.36    4.52
  -6  -4  16   12.82    3.10
   6   4 -15   14.14    3.64
  -6  -4  15    9.87    2.85
   6   4 -14   11.50    3.49
  -6  -4  14    7.05    2.41
   6   4 -13   18.52    4.09
  -6  -4  13   13.15    2.82
   6   4 -12   -0.34    1.64
  -6  -4  12   -0.12    1.36
   6   4 -12    0.26    1.05
   6   4 -11   27.95    4.44
  -6  -4  11   35.61    4.00
   6   4 -11   34.79    3.93
  -6  -4  10   72.88    5.37
   6   4 -10   79.66    7.41
   6   4  -9    2.93    2.20
   6   4  -8   63.89    6.61
   6   4  -7    0.27    1.65
   6   4  -6  106.33    8.32
   6   4  -5  155.65    9.93
   6   4  -4    5.99    2.62
  -6  -4   4    3.82    1.10
  -6  -4   3  179.64    6.55
   6   4  -3  178.41   10.61
   6   4  -2   21.18    3.86
   6   4  -1   62.90    4.19
   6   4  -1   71.69    6.86
   6   4   0   30.56    2.77
   6   4   0   25.63    4.38
   6   4   1    2.79    0.90
   6   4   1    5.92    2.49
   6   4   2   12.59    1.62
   6   4   2   15.57    3.56
   6   4   3   28.06    2.20
   6   4   3   25.28    4.66
  -6  -4  -4    1.28    0.95
   6   4   4    5.00    2.45
   6   4   5    0.66    2.05
   6   4   6    2.41    2.19
   6   4   7   -0.79    1.91
   6   4   8    0.87    2.37
   6   4   9    8.88    3.35
   6   4  10    0.75    2.24
   6   4  11    3.16    2.64
   6   4  12    9.33    3.99
   6   4  13   10.13    4.06
   6   5 -19    3.27    2.24
   6   5 -18    1.74    2.59
   6   5 -17   12.17    3.82
   6   5 -16   17.93    4.30
  -6  -5  16   17.16    3.54
   6   5 -15   12.96    3.61
  -6  -5  15    5.88    2.27
   6   5 -14   33.26    5.52
  -6  -5  14   40.40    4.79
   6   5 -13    3.52    2.18
  -6  -5  13    1.69    1.20
  -6  -5  12   98.64    6.66
   6   5 -12   97.37    6.39
   6   5 -12   94.46    8.58
   6   5 -11   -2.12    1.88
  -6  -5  11    0.58    0.95
   6   5 -10    3.71    2.01
  -6  -5  10    5.31    1.58
   6   5  -9    4.65    2.44
  -6  -5   9    3.50    1.37
   6   5  -8    3.71    2.07
   6   5  -7   47.96    5.99
   6   5  -6   80.04    7.48
   6   5  -5   32.46    4.90
   6   5  -4   47.98    5.79
   6   5  -3    0.87    1.83
  -6  -5   3   -0.37    0.71
  -6  -5   2   90.71    4.26
   6   5  -2  102.03    8.35
   6   5  -1   45.73    5.74
   6   5   0   30.07    3.01
   6   5   0   19.35    4.05
   6   5   1   64.71    4.26
   6   5   1   62.55    6.89
   6   5   2    5.72    1.43
   6   5   2    5.97    2.46
   6   5   3   45.73    3.33
   6   5   3   38.96    5.57
  -6  -5  -4    4.23    1.47
   6   5   4    5.77    2.71
   6   5   5    6.60    2.99
   6   5   6    9.66    3.64
   6   5   7   -0.88    2.24
   6   5   8    8.52    3.33
   6   5   9    0.47    2.42
   6   5  10    7.29    3.34
   6   5  11    3.10    2.89
   6   5  12    2.95    2.48
   6   5  13    6.12    3.31
   6   6 -18   12.13    4.10
   6   6 -17    7.87    3.50
   6   6 -16   10.89    3.56
   6   6 -15   44.37    6.65
   6   6 -14    0.47    1.91
   6   6 -13   65.04    7.65
  -6  -6  13   52.41    4.96
   6   6 -12   16.10    4.09
  -6  -6  12   17.96    2.80
   6   6 -11   24.65    4.73
  -6  -6  11   21.97    2.87
   6   6 -10   47.15    6.17
  -6  -6  10   41.15    3.54
   6   6  -9    1.54    1.78
  -6  -6   9    0.73    0.77
   6   6  -8    9.84    2.93
  -6  -6   8    9.31    1.51
   6   6  -7   15.59    3.79
  -6  -6   7   14.30    1.62
   6   6  -6    2.00    1.71
  -6  -6   6    2.06    0.62
   6   6  -5   38.19    5.38
   6   6  -4    1.92    1.93
   6   6  -3   51.55    6.20
   6   6  -2   17.58    3.86
   6   6  -2   16.60    2.80
  -6  -6   2   16.60    1.56
  -6  -6   2   16.71    1.53
   6   6  -1   10.08    3.03
  -6  -6   1   10.16    1.39
  -6  -6   1   10.08    1.37
  -6  -6   0    6.12    1.19
   6   6   0    3.11    2.70
  -6  -6  -1    6.40    1.36
   6   6   1    3.43    2.64
   6   6   2    7.42    1.66
  -6  -6  -2    7.77    1.69
   6   6   3    1.83    2.16
   6   6   4   11.45    3.26
   6   6   5   17.88    4.21
   6   6   6    4.02    2.82
   6   6   7   -1.96    2.14
   6   6   8    0.48    2.16
   6   6   9    5.47    3.29
   6   6   9   -4.34    3.09
   6   6  10    0.43    3.06
   6   6  11    1.18    2.51
   6   6  12   23.09    5.33
   6   7 -17    4.47    2.87
   6   7 -16   25.48    5.44
   6   7 -15    5.47    3.09
   6   7 -14   32.67    5.77
   6   7 -13    2.56    2.68
   6   7 -12   54.33    7.10
   6   7 -11   66.17    7.78
   6   7 -10    1.68    1.96
   6   7  -9   32.69    5.44
   6   7  -8    1.26    2.11
   6   7  -7    0.69    1.90
   6   7  -6  113.22    9.55
   6   7  -5    2.69    1.96
   6   7  -4   53.09    6.53
   6   7  -3    1.30    1.75
[truncated: 107,894 more chars]
