# Supplementary material
Source: MDPI journal article supplement (https://www.mdpi.com/2073-4352/8/6/236)
Supplement: s1 [file s1 › 4.cif]

data_xiao1
_audit_creation_date              2018-05-02
_audit_creation_method
;
Olex2 1.2
(compiled 2013.09.17 svn.r2790 for OlexSys, GUI svn.r4601)
;
_shelxl_version_number            2013-2
_publ_contact_author_address      ?
_publ_contact_author_email        ?
_publ_contact_author_name         ''
_publ_contact_author_phone        ?
_publ_section_references
;
Dolomanov, O.V., Bourhis, L.J., Gildea, R.J, Howard, J.A.K. & Puschmann, H.
 (2009), J. Appl. Cryst. 42, 339-341.

Sheldrick, G.M. (2008). Acta Cryst. A64, 112-122
;
_chemical_name_common             ?
_chemical_name_systematic
;
 ?
;
_chemical_formula_moiety          'C24 H21 Cd N5 O6'
_chemical_formula_sum             'C24 H21 Cd N5 O6'
_chemical_formula_weight          587.86
_chemical_melting_point           ?
loop_
  _atom_type_symbol
  _atom_type_description
  _atom_type_scat_dispersion_real
  _atom_type_scat_dispersion_imag
  _atom_type_scat_source
 'C' 'C' 0.0033 0.0016 'International Tables Vol C Tables 4.2.6.8 and 6.1.1.4'
 'H' 'H' 0.0000 0.0000 'International Tables Vol C Tables 4.2.6.8 and 6.1.1.4'
 'N' 'N' 0.0061 0.0033 'International Tables Vol C Tables 4.2.6.8 and 6.1.1.4'
 'O' 'O' 0.0106 0.0060 'International Tables Vol C Tables 4.2.6.8 and 6.1.1.4'
 'Cd' 'Cd' -0.8075 1.2024
 'International Tables Vol C Tables 4.2.6.8 and 6.1.1.4'

_shelx_space_group_comment
;
The symmetry employed for this shelxl refinement is uniquely defined
by the following loop, which should always be used as a source of
symmetry information in preference to the above space-group names.
They are only intended as comments.
;
_space_group_crystal_system       'monoclinic'
_space_group_IT_number            14
_space_group_name_H-M_alt         'P 1 21/n 1'
_space_group_name_Hall            '-P 2yn'
loop_
  _space_group_symop_operation_xyz
 'x, y, z'
 '-x+1/2, y+1/2, -z+1/2'
 '-x, -y, -z'
 'x-1/2, -y-1/2, z-1/2'

_cell_length_a                    7.464(6)
_cell_length_b                    19.816(15)
_cell_length_c                    16.031(12)
_cell_angle_alpha                 90
_cell_angle_beta                  103.46
_cell_angle_gamma                 90
_cell_volume                      2306(3)
_cell_formula_units_Z             4
_cell_measurement_reflns_used     6335
_cell_measurement_temperature     293(2)
_cell_measurement_theta_max       27.945
_cell_measurement_theta_min       2.433
_shelx_estimated_absorpt_T_max    ?
_shelx_estimated_absorpt_T_min    ?
_exptl_absorpt_coefficient_mu     1.000
_exptl_absorpt_correction_T_max   ?
_exptl_absorpt_correction_T_min   ?
_exptl_absorpt_correction_type    'none'
_exptl_absorpt_process_details    ?
_exptl_crystal_colour             colorless
_exptl_crystal_density_diffrn     1.693
_exptl_crystal_density_meas       ?
_exptl_crystal_density_method     ?
_exptl_crystal_description        block
_exptl_crystal_F_000              1184
_exptl_crystal_size_max           0.33
_exptl_crystal_size_mid           0.25
_exptl_crystal_size_min           0.22
_exptl_special_details
;
 ?
;
_exptl_transmission_factor_max    ?
_exptl_transmission_factor_min    ?
_diffrn_reflns_av_R_equivalents   0.1034
_diffrn_reflns_av_unetI/netI      0.0694
_diffrn_reflns_Laue_measured_fraction_full 0.972
_diffrn_reflns_Laue_measured_fraction_max 0.999
_diffrn_reflns_limit_h_max        8
_diffrn_reflns_limit_h_min        -8
_diffrn_reflns_limit_k_max        23
_diffrn_reflns_limit_k_min        -12
_diffrn_reflns_limit_l_max        18
_diffrn_reflns_limit_l_min        -19
_diffrn_reflns_number             11646
_diffrn_reflns_point_group_measured_fraction_full 0.972
_diffrn_reflns_point_group_measured_fraction_max 0.999
_diffrn_reflns_theta_full         25.242
_diffrn_reflns_theta_max          24.998
_diffrn_reflns_theta_min          2.055
_diffrn_ambient_temperature       293(2)
_diffrn_detector_area_resol_mean  ?
_diffrn_measured_fraction_theta_full 0.972
_diffrn_measured_fraction_theta_max 0.999
_diffrn_measurement_device_type   'Bruker P4'
_diffrn_measurement_method        '\w scans'
_diffrn_radiation_monochromator   'graphite'
_diffrn_radiation_type            'MoK\a'
_diffrn_radiation_wavelength      0.71073
_diffrn_source                    ?
_reflns_Friedel_coverage          0.000
_reflns_Friedel_fraction_full     .
_reflns_Friedel_fraction_max      .
_reflns_number_gt                 3472
_reflns_number_total              4045
_reflns_special_details
;
 Reflections were merged by SHELXL according to the crystal
 class for the calculation of statistics and refinement.
 
 _reflns_Friedel_fraction is defined as the number of unique
 Friedel pairs measured divided by the number that would be
 possible theoretically, ignoring centric projections and
 systematic absences.
;
_reflns_threshold_expression      'I > 2\s(I)'
_computing_cell_refinement        ?
_computing_data_collection        ?
_computing_data_reduction         'SAINT v7.23A (Bruker, 2003)'
_computing_molecular_graphics
;
O. V. Dolomanov, L. J. Bourhis, R. J. Gildea, J. A. K. Howard and H. Puschmann,
OLEX2: a complete structure solution, refinement and analysis program.
J. Appl. Cryst. (2009). 42, 339-341.
;
_computing_publication_material
;
O. V. Dolomanov, L. J. Bourhis, R. J. Gildea, J. A. K. Howard and H. Puschmann,
OLEX2: a complete structure solution, refinement and analysis program.
J. Appl. Cryst. (2009). 42, 339-341.
;
_computing_structure_refinement
;
SHELX, G.M. Sheldrick, Acta Cryst.
(2008). A64, 112-122
;
_computing_structure_solution
'SUPERFLIP, J. Appl. Cryst. (2007) 40, 786-790'
_refine_diff_density_max          0.558
_refine_diff_density_min          -1.267
_refine_diff_density_rms          0.108
_refine_ls_extinction_coef        .
_refine_ls_extinction_method      none
_refine_ls_goodness_of_fit_ref    1.073
_refine_ls_hydrogen_treatment     mixed
_refine_ls_matrix_type            full
_refine_ls_number_parameters      327
_refine_ls_number_reflns          4045
_refine_ls_number_restraints      0
_refine_ls_R_factor_all           0.0433
_refine_ls_R_factor_gt            0.0371
_refine_ls_restrained_S_all       1.073
_refine_ls_shift/su_max           0.000
_refine_ls_shift/su_mean          0.000
_refine_ls_structure_factor_coef  Fsqd
_refine_ls_weighting_details
;
 w=1/[\s^2^(Fo^2^)+(0.0415P)^2^+0.5114P]
 where P=(Fo^2^+2Fc^2^)/3
;
_refine_ls_weighting_scheme       calc
_refine_ls_wR_factor_gt           0.0919
_refine_ls_wR_factor_ref          0.0965
_refine_special_details
;
 ?
;
_olex2_refinement_description
;
1. Others
 Fixed Uiso: H13(0.053) H17A(0.051) H17B(0.051) H20(0.056) H22A(0.082)
 H22B(0.082) H22C(0.082) H24(0.071) H25(0.067) H27(0.057) H29(0.07) H32(0.068)
 H33A(0.071) H33B(0.071) H33C(0.071) H34(0.064) H35A(0.07) H35B(0.07)
 H37(0.062) H38(0.08) H42(0.078)
 Fixed X: H13(0.8245) H17A(0.6641) H17B(0.4546) H20(0.8797) H22A(0.122)
 H22B(0.1423) H22C(-0.0063) H24(0.5795) H25(0.854) H27(0.8011) H29(0.9355)
 H32(0.6899) H33A(0.245) H33B(0.2161) H33C(0.2806) H34(0.4725) H35A(0.2136)
 H35B(0.0757) H37(1.2233) H38(1.1875) H42(0.4385)
 Fixed Y: H13(0.101) H17A(-0.0989) H17B(-0.0813) H20(-0.0087) H22A(0.2144)
 H22B(0.1839) H22C(0.2395) H24(0.3425) H25(0.0333) H27(0.0182) H29(0.4084) H32(-
 0.0264) H33A(-0.0056) H33B(0.0704) H33C(0.051) H34(-0.1029) H35A(0.3842)
 H35B(0.3248) H37(0.2381) H38(0.3472) H42(0.4153)
 Fixed Z: H13(0.0533) H17A(0.1697) H17B(0.1555) H20(0.1229) H22A(0.1969)
 H22B(0.1093) H22C(0.1107) H24(0.0787) H25(0.4279) H27(0.2828) H29(-0.2072)
 H32(0.5078) H33A(0.0951) H33B(0.0682) H33C(0.1654) H34(0.4413) H35A(0.2732)
 H35B(0.2424) H37(-0.1677) H38(-0.2205) H42(0.1676)
;
_atom_sites_solution_hydrogens    geom
_atom_sites_solution_primary      iterative
_atom_sites_solution_secondary    ?
loop_
  _atom_site_label
  _atom_site_type_symbol
  _atom_site_fract_x
  _atom_site_fract_y
  _atom_site_fract_z
  _atom_site_U_iso_or_equiv
  _atom_site_adp_type
  _atom_site_occupancy
  _atom_site_site_symmetry_order
  _atom_site_calc_flag
  _atom_site_refinement_flags_posn
  _atom_site_refinement_flags_adp
  _atom_site_refinement_flags_occupancy
  _atom_site_disorder_assembly
  _atom_site_disorder_group
 Cd1 Cd 0.44824(3) 0.18946(2) 0.00849(2) 0.03466(12) Uani 1 1 d . . . . .
 O5 O 0.1883(3) 0.14680(11) -0.05867(18) 0.0455(6) Uani 1 1 d . . . . .
 O1 O 0.7354(3) 0.23661(12) 0.00717(17) 0.0465(6) Uani 1 1 d . . . . .
 O2 O 0.5498(3) 0.21978(12) -0.11555(16) 0.0409(6) Uani 1 1 d . . . . .
 C6 C 0.4816(5) 0.04379(16) 0.1023(2) 0.0375(8) Uani 1 1 d . . . . .
 C7 C 0.6975(5) 0.24011(15) -0.0717(2) 0.0339(8) Uani 1 1 d . . . . .
 C8 C 0.8379(4) 0.27042(15) -0.1155(2) 0.0328(7) Uani 1 1 d . . . . .
 O6 O -0.1045(3) 0.12575(12) -0.0950(2) 0.0526(7) Uani 1 1 d . . . . .
 C10 C 0.9942(4) 0.23483(16) -0.1228(2) 0.0339(7) Uani 1 1 d . . . . .
 N2 N 0.6060(4) -0.00399(13) 0.1304(2) 0.0383(7) Uani 1 1 d . . . . .
 C43 C 0.0260(4) 0.16346(16) -0.0892(2) 0.0336(7) Uani 1 1 d . . . . .
 C13 C 0.7382(5) 0.07550(17) 0.0729(3) 0.0441(9) Uani 1 1 d . . . . .
 H13 H 0.8245 0.1010 0.0533 0.053 Uiso 1 1 calc R . . . .
 C14 C 0.6043(5) -0.05192(14) 0.2730(2) 0.0356(8) Uani 1 1 d . . . . .
 C15 C 0.8219(5) 0.33554(18) -0.1479(3) 0.0414(8) Uani 1 1 d . . . . .
 N5 N 0.6631(5) 0.37696(16) -0.1434(2) 0.0536(9) Uani 1 1 d . . . . .
 C17 C 0.5782(5) -0.06432(16) 0.1783(2) 0.0421(9) Uani 1 1 d . . . . .
 H17A H 0.6641 -0.0989 0.1697 0.051 Uiso 1 1 calc R . . . .
 H17B H 0.4546 -0.0813 0.1555 0.051 Uiso 1 1 calc R . . . .
 N4 N 0.2567(5) 0.33714(16) 0.1694(2) 0.0497(8) Uani 1 1 d . . . . .
 C19 C 0.5041(5) -0.08814(16) 0.3217(2) 0.0389(8) Uani 1 1 d . . . . .
 C20 C 0.7696(5) 0.01529(18) 0.1114(3) 0.0468(9) Uani 1 1 d . . . . .
 H20 H 0.8797 -0.0087 0.1229 0.056 Uiso 1 1 calc R . . . .
 N1 N 0.5590(4) 0.09350(13) 0.06714(19) 0.0394(7) Uani 1 1 d . . . . .
 C22 C 0.1153(6) 0.2241(2) 0.1376(3) 0.0547(10) Uani 1 1 d . . . . .
 H22A H 0.1220 0.2144 0.1969 0.082 Uiso 1 1 calc GR . . . .
 H22B H 0.1423 0.1839 0.1093 0.082 Uiso 1 1 calc GR . . . .
 H22C H -0.0063 0.2395 0.1107 0.082 Uiso 1 1 calc GR . . . .
 C23 C 0.2506(5) 0.27694(18) 0.1311(2) 0.0411(8) Uani 1 1 d . . . . .
 C24 C 0.4786(6) 0.3317(2) 0.1009(3) 0.0592(12) Uani 1 1 d . . . . .
 H24 H 0.5795 0.3425 0.0787 0.071 Uiso 1 1 calc R . . . .
 C25 C 0.7652(6) 0.00250(19) 0.4010(3) 0.0558(10) Uani 1 1 d . . . . .
 H25 H 0.8540 0.0333 0.4279 0.067 Uiso 1 1 calc R . . . .
 N3 N 0.3835(4) 0.27201(14) 0.0892(2) 0.0459(8) Uani 1 1 d . . . . .
 C27 C 0.7338(5) -0.00660(16) 0.3142(3) 0.0479(9) Uani 1 1 d . . . . .
 H27 H 0.8011 0.0182 0.2828 0.057 Uiso 1 1 calc R . . . .
 O3 O 0.5728(5) 0.36314(14) -0.0923(2) 0.0717(9) Uani 1 1 d . . . . .
 C29 C 0.9513(6) 0.3644(2) -0.1866(3) 0.0585(12) Uani 1 1 d . . . . .
 H29 H 0.9355 0.4084 -0.2072 0.070 Uiso 1 1 calc R . . . .
 O4 O 0.6325(6) 0.4252(2) -0.1900(3) 0.1160(17) Uani 1 1 d . . . . .
 C32 C 0.6679(6) -0.03308(19) 0.4489(3) 0.0569(11) Uani 1 1 d . . . . .
 H32 H 0.6899 -0.0264 0.5078 0.068 Uiso 1 1 calc R . . . .
 C33 C 0.2893(5) 0.03950(19) 0.1083(3) 0.0472(9) Uani 1 1 d . . . . .
 H33A H 0.2450 -0.0056 0.0951 0.071 Uiso 1 1 calc GR . . . .
 H33B H 0.2161 0.0704 0.0682 0.071 Uiso 1 1 calc GR . . . .
 H33C H 0.2806 0.0510 0.1654 0.071 Uiso 1 1 calc GR . . . .
 C34 C 0.5385(6) -0.07835(19) 0.4091(3) 0.0533(10) Uani 1 1 d . . . . .
 H34 H 0.4725 -0.1029 0.4413 0.064 Uiso 1 1 calc R . . . .
 C35 C 0.1376(6) 0.3626(2) 0.2230(3) 0.0579(11) Uani 1 1 d . . . . .
 H35A H 0.2136 0.3842 0.2732 0.070 Uiso 1 1 calc R . . . .
 H35B H 0.0757 0.3248 0.2424 0.070 Uiso 1 1 calc R . . . .
 C37 C 1.1213(5) 0.26325(19) -0.1623(3) 0.0516(10) Uani 1 1 d . . . . .
 H37 H 1.2233 0.2381 -0.1677 0.062 Uiso 1 1 calc R . . . .
 C38 C 1.1003(6) 0.3285(2) -0.1943(3) 0.0667(14) Uani 1 1 d . . . . .
 H38 H 1.1875 0.3472 -0.2205 0.080 Uiso 1 1 calc R . . . .
 C42 C 0.4011(7) 0.3717(2) 0.1499(3) 0.0647(13) Uani 1 1 d . . . . .
 H42 H 0.4385 0.4153 0.1676 0.078 Uiso 1 1 calc R . . . .

loop_
  _atom_site_aniso_label
  _atom_site_aniso_U_11
  _atom_site_aniso_U_22
  _atom_site_aniso_U_33
  _atom_site_aniso_U_23
  _atom_site_aniso_U_13
  _atom_site_aniso_U_12
 Cd1 0.03331(18) 0.02795(16) 0.0467(2) 0.00014(10) 0.01748(13) 0.00027(9)
 O5 0.0326(14) 0.0328(12) 0.0685(18) 0.0018(12) 0.0065(12) 0.0034(11)
 O1 0.0426(14) 0.0544(15) 0.0462(17) 0.0033(12) 0.0182(12) -0.0022(12)
 O2 0.0254(12) 0.0446(13) 0.0547(16) -0.0045(12) 0.0134(11) -0.0049(11)
 C6 0.045(2) 0.0316(16) 0.040(2) -0.0003(15) 0.0168(16) -0.0014(16)
 C7 0.0324(19) 0.0255(15) 0.047(2) 0.0010(15) 0.0167(16) 0.0050(14)
 C8 0.0290(17) 0.0334(16) 0.0353(19) 0.0018(14) 0.0059(14) -0.0024(14)
 O6 0.0342(14) 0.0402(13) 0.082(2) 0.0101(13) 0.0112(13) -0.0077(12)
 C10 0.0271(17) 0.0336(16) 0.042(2) 0.0066(14) 0.0093(14) -0.0002(14)
 N2 0.0469(16) 0.0276(13) 0.0457(19) 0.0067(12) 0.0213(14) 0.0003(13)
 C43 0.0313(19) 0.0307(15) 0.042(2) -0.0004(14) 0.0146(15) 0.0024(15)
 C13 0.040(2) 0.0364(18) 0.061(3) 0.0109(17) 0.0231(18) -0.0043(16)
 C14 0.0390(19) 0.0235(15) 0.047(2) 0.0023(14) 0.0158(16) 0.0058(14)
 C15 0.0334(19) 0.0355(17) 0.052(2) 0.0079(17) 0.0039(16) 0.0039(16)
 N5 0.054(2) 0.0432(18) 0.063(2) 0.0086(17) 0.0120(18) 0.0099(16)
 C17 0.058(2) 0.0251(15) 0.051(2) 0.0054(15) 0.0274(19) -0.0025(16)
 N4 0.057(2) 0.0460(16) 0.053(2) -0.0055(16) 0.0257(17) 0.0130(16)
 C19 0.044(2) 0.0334(16) 0.041(2) 0.0021(15) 0.0145(16) -0.0027(15)
 C20 0.040(2) 0.0430(19) 0.062(3) 0.0143(18) 0.0223(18) 0.0065(17)
 N1 0.0415(17) 0.0313(14) 0.0489(19) 0.0068(13) 0.0176(14) -0.0022(13)
 C22 0.046(2) 0.069(3) 0.053(3) 0.007(2) 0.0196(19) -0.003(2)
 C23 0.038(2) 0.0444(19) 0.043(2) 0.0010(17) 0.0132(16) 0.0088(17)
 C24 0.059(3) 0.049(2) 0.079(3) -0.019(2) 0.034(2) -0.014(2)
 C25 0.058(2) 0.044(2) 0.061(3) -0.008(2) 0.005(2) -0.008(2)
 N3 0.0440(17) 0.0404(16) 0.060(2) -0.0107(15) 0.0263(16) -0.0016(14)
 C27 0.052(2) 0.0328(18) 0.062(3) 0.0023(17) 0.019(2) -0.0074(17)
 O3 0.072(2) 0.0504(16) 0.103(3) 0.0102(17) 0.043(2) 0.0183(15)
 C29 0.047(2) 0.047(2) 0.078(3) 0.031(2) 0.008(2) -0.0034(19)
 O4 0.123(3) 0.107(3) 0.135(4) 0.079(3) 0.066(3) 0.079(3)
 C32 0.073(3) 0.048(2) 0.045(2) 0.0013(19) 0.004(2) 0.000(2)
 C33 0.041(2) 0.0444(19) 0.060(3) 0.0039(18) 0.0201(18) -0.0051(17)
 C34 0.067(3) 0.050(2) 0.046(2) 0.0064(18) 0.019(2) -0.009(2)
 C35 0.068(3) 0.063(2) 0.048(2) -0.001(2) 0.023(2) 0.029(2)
 C37 0.0342(19) 0.055(2) 0.069(3) 0.020(2) 0.0193(19) 0.0056(18)
 C38 0.040(2) 0.069(3) 0.096(4) 0.045(3) 0.027(2) -0.001(2)
 C42 0.074(3) 0.047(2) 0.081(3) -0.022(2) 0.034(3) -0.009(2)

_geom_special_details
;
 All esds (except the esd in the dihedral angle between two l.s. planes)
 are estimated using the full covariance matrix.  The cell esds are taken
 into account individually in the estimation of esds in distances, angles
 and torsion angles; correlations between esds in cell parameters are only
 used when they are defined by crystal symmetry.  An approximate (isotropic)
 treatment of cell esds is used for estimating esds involving l.s. planes.
;
loop_
  _geom_bond_atom_site_label_1
  _geom_bond_atom_site_label_2
  _geom_bond_distance
  _geom_bond_site_symmetry_2
  _geom_bond_publ_flag
 Cd1 O5 2.160(3) . ?
 Cd1 O1 2.343(3) . ?
 Cd1 O2 2.365(3) . ?
 Cd1 C7 2.690(3) . ?
 Cd1 N1 2.196(3) . ?
 Cd1 N3 2.207(3) . ?
 O5 C43 1.241(4) . ?
 O1 C7 1.232(4) . ?
 O2 C7 1.229(4) . ?
 C6 N2 1.330(4) . ?
 C6 N1 1.332(4) . ?
 C6 C33 1.462(5) . ?
 C7 C8 1.515(4) . ?
 C8 C10 1.391(5) . ?
 C8 C15 1.386(5) . ?
 O6 C43 1.214(4) . ?
 C10 C43 1.512(5) 1_655 ?
 C10 C37 1.378(5) . ?
 N2 C17 1.461(4) . ?
 N2 C20 1.380(4) . ?
 C43 C10 1.512(5) 1_455 ?
 C13 C20 1.338(5) . ?
 C13 N1 1.366(5) . ?
 C14 C17 1.506(5) . ?
 C14 C19 1.399(5) . ?
 C14 C27 1.371(5) . ?
 C15 N5 1.458(5) . ?
 C15 C29 1.388(5) . ?
 N5 O3 1.206(5) . ?
 N5 O4 1.203(4) . ?
 N4 C23 1.338(5) . ?
 N4 C35 1.463(5) . ?
 N4 C42 1.373(6) . ?
 C19 C34 1.378(6) . ?
 C19 C35 1.494(5) 2_545 ?
 C22 C23 1.475(5) . ?
 C23 N3 1.325(5) . ?
 C24 N3 1.369(5) . ?
 C24 C42 1.339(6) . ?
 C25 C27 1.368(6) . ?
 C25 C32 1.369(6) . ?
 C29 C38 1.350(6) . ?
 C32 C34 1.363(6) . ?
 C35 C19 1.494(5) 2 ?
 C37 C38 1.386(5) . ?

loop_
  _geom_angle_atom_site_label_1
  _geom_angle_atom_site_label_2
  _geom_angle_atom_site_label_3
  _geom_angle
  _geom_angle_site_symmetry_1
  _geom_angle_site_symmetry_3
  _geom_angle_publ_flag
 O5 Cd1 O1 150.35(10) . . ?
 O5 Cd1 O2 96.13(10) . . ?
 O5 Cd1 C7 123.28(12) . . ?
 O5 Cd1 N1 94.56(11) . . ?
 O5 Cd1 N3 106.76(11) . . ?
 O1 Cd1 O2 54.41(9) . . ?
 O1 Cd1 C7 27.23(10) . . ?
 O2 Cd1 C7 27.18(10) . . ?
 N1 Cd1 O1 95.46(10) . . ?
 N1 Cd1 O2 114.69(10) . . ?
 N1 Cd1 C7 107.13(11) . . ?
 N1 Cd1 N3 120.19(13) . . ?
 N3 Cd1 O1 92.01(10) . . ?
 N3 Cd1 O2 117.45(11) . . ?
 N3 Cd1 C7 105.86(11) . . ?
 C43 O5 Cd1 140.7(2) . . ?
 C7 O1 Cd1 92.3(2) . . ?
 C7 O2 Cd1 91.3(2) . . ?
 N2 C6 N1 109.4(3) . . ?
 N2 C6 C33 123.7(3) . . ?
 N1 C6 C33 126.8(3) . . ?
 O1 C7 Cd1 60.50(17) . . ?
 O1 C7 C8 118.7(3) . . ?
 O2 C7 Cd1 61.49(18) . . ?
 O2 C7 O1 122.0(3) . . ?
 O2 C7 C8 119.3(3) . . ?
 C8 C7 Cd1 178.4(2) . . ?
 C10 C8 C7 121.5(3) . . ?
 C15 C8 C7 122.3(3) . . ?
 C15 C8 C10 116.2(3) . . ?
 C8 C10 C43 120.6(3) . 1_655 ?
 C37 C10 C8 120.8(3) . . ?
 C37 C10 C43 118.6(3) . 1_655 ?
 C6 N2 C17 126.0(3) . . ?
 C6 N2 C20 108.2(3) . . ?
 C20 N2 C17 125.7(3) . . ?
 O5 C43 C10 116.6(3) . 1_455 ?
 O6 C43 O5 124.0(3) . . ?
 O6 C43 C10 119.4(3) . 1_455 ?
 C20 C13 N1 109.2(3) . . ?
 C19 C14 C17 121.3(3) . . ?
 C27 C14 C17 120.3(3) . . ?
 C27 C14 C19 118.4(4) . . ?
 C8 C15 N5 120.4(3) . . ?
 C8 C15 C29 122.9(3) . . ?
 C29 C15 N5 116.7(3) . . ?
 O3 N5 C15 119.7(3) . . ?
 O4 N5 C15 117.1(4) . . ?
 O4 N5 O3 123.2(4) . . ?
 N2 C17 C14 113.3(3) . . ?
 C23 N4 C35 128.1(4) . . ?
 C23 N4 C42 106.6(3) . . ?
 C42 N4 C35 125.3(3) . . ?
 C14 C19 C35 118.6(3) . 2_545 ?
 C34 C19 C14 119.9(3) . . ?
 C34 C19 C35 121.5(3) . 2_545 ?
 C13 C20 N2 106.2(3) . . ?
 C6 N1 Cd1 131.6(2) . . ?
 C6 N1 C13 107.0(3) . . ?
 C13 N1 Cd1 121.3(2) . . ?
 N4 C23 C22 123.5(3) . . ?
 N3 C23 N4 110.4(3) . . ?
 N3 C23 C22 126.1(3) . . ?
 C42 C24 N3 108.2(4) . . ?
 C27 C25 C32 121.0(4) . . ?
 C23 N3 Cd1 130.0(3) . . ?
 C23 N3 C24 107.0(3) . . ?
 C24 N3 Cd1 122.9(2) . . ?
 C25 C27 C14 120.7(3) . . ?
 C38 C29 C15 119.8(3) . . ?
 C34 C32 C25 119.2(4) . . ?
 C32 C34 C19 120.8(4) . . ?
 N4 C35 C19 113.8(3) . 2 ?
 C10 C37 C38 121.3(3) . . ?
 C29 C38 C37 118.9(4) . . ?
 C24 C42 N4 107.8(4) . . ?

_shelx_res_file
;
TITL XIAO1 in P2(1)/n
CELL 0.71073 7.4637 19.8162 16.0305 90 103.462 90
ZERR 4 0.0057 0.0147 0.0119 0 0 0
LATT 1
SYMM 0.5-X,0.5+Y,0.5-Z

SFAC C H N O Cd
UNIT 96 84 20 24 4

L.S. 24
PLAN  20
BOND
fmap 2
acta
OMIT -3 50
OMIT 3 3 16
REM <HKL>C:/Users/lenovo/Desktop/wu/EQU_19---7/XIAO1.hkl</HKL>

WGHT    0.041500    0.511400
FVAR       0.17726
CD1   5    0.448241    0.189455    0.008492    11.00000    0.03331    0.02795 =
         0.04673    0.00014    0.01748    0.00027
O5    4    0.188292    0.146803   -0.058670    11.00000    0.03265    0.03284 =
         0.06853    0.00179    0.00652    0.00336
O1    4    0.735442    0.236608    0.007165    11.00000    0.04265    0.05441 =
         0.04625    0.00325    0.01817   -0.00218
O2    4    0.549779    0.219780   -0.115548    11.00000    0.02540    0.04457 =
         0.05472   -0.00448    0.01344   -0.00492
C6    1    0.481552    0.043794    0.102337    11.00000    0.04457    0.03158 =
         0.03965   -0.00034    0.01676   -0.00139
C7    1    0.697508    0.240114   -0.071716    11.00000    0.03236    0.02554 =
         0.04736    0.00103    0.01669    0.00497
C8    1    0.837915    0.270424   -0.115548    11.00000    0.02895    0.03344 =
         0.03527    0.00176    0.00587   -0.00244
O6    4   -0.104523    0.125754   -0.095012    11.00000    0.03418    0.04025 =
         0.08227    0.01011    0.01116   -0.00771
C10   1    0.994181    0.234828   -0.122809    11.00000    0.02709    0.03357 =
         0.04154    0.00660    0.00930   -0.00021
N2    3    0.606027   -0.003995    0.130429    11.00000    0.04686    0.02758 =
         0.04568    0.00675    0.02134    0.00032
C43   1    0.026046    0.163465   -0.089184    11.00000    0.03134    0.03067 =
         0.04183   -0.00041    0.01465    0.00236
C13   1    0.738182    0.075496    0.072930    11.00000    0.04026    0.03638 =
         0.06133    0.01093    0.02306   -0.00432
AFIX  43
H13   2    0.824542    0.101021    0.053291    11.00000   -1.20000
AFIX   0
C14   1    0.604288   -0.051918    0.272990    11.00000    0.03895    0.02353 =
         0.04728    0.00227    0.01582    0.00583
C15   1    0.821885    0.335537   -0.147924    11.00000    0.03339    0.03549 =
         0.05231    0.00790    0.00391    0.00390
N5    3    0.663058    0.376963   -0.143368    11.00000    0.05353    0.04323 =
         0.06322    0.00860    0.01199    0.00988
C17   1    0.578241   -0.064325    0.178254    11.00000    0.05777    0.02513 =
         0.05077    0.00535    0.02738   -0.00247
AFIX  23
H17A  2    0.664147   -0.098907    0.169654    11.00000   -1.20000
H17B  2    0.454572   -0.081251    0.155473    11.00000   -1.20000
AFIX   0
N4    3    0.256730    0.337142    0.169353    11.00000    0.05655    0.04600 =
         0.05300   -0.00546    0.02574    0.01298
C19   1    0.504097   -0.088136    0.321715    11.00000    0.04421    0.03339 =
         0.04125    0.00211    0.01449   -0.00268
C20   1    0.769636    0.015287    0.111353    11.00000    0.04039    0.04298 =
         0.06212    0.01434    0.02229    0.00650
AFIX  43
H20   2    0.879685   -0.008744    0.122889    11.00000   -1.20000
AFIX   0
N1    3    0.558999    0.093501    0.067145    11.00000    0.04155    0.03131 =
         0.04894    0.00680    0.01760   -0.00223
C22   1    0.115338    0.224061    0.137563    11.00000    0.04642    0.06925 =
         0.05250    0.00658    0.01961   -0.00260
AFIX 137
H22A  2    0.122011    0.214384    0.196887    11.00000   -1.50000
H22B  2    0.142336    0.183893    0.109323    11.00000   -1.50000
H22C  2   -0.006335    0.239501    0.110712    11.00000   -1.50000
AFIX   0
C23   1    0.250588    0.276938    0.131056    11.00000    0.03827    0.04437 =
         0.04258    0.00101    0.01319    0.00876
C24   1    0.478605    0.331666    0.100885    11.00000    0.05866    0.04900 =
         0.07905   -0.01858    0.03429   -0.01376
AFIX  43
H24   2    0.579507    0.342490    0.078667    11.00000   -1.20000
AFIX   0
C25   1    0.765247    0.002504    0.400994    11.00000    0.05799    0.04354 =
         0.06136   -0.00801    0.00496   -0.00849
AFIX  43
H25   2    0.854043    0.033329    0.427856    11.00000   -1.20000
AFIX   0
N3    3    0.383549    0.272013    0.089156    11.00000    0.04400    0.04040 =
         0.06035   -0.01071    0.02631   -0.00157
C27   1    0.733847   -0.006603    0.314216    11.00000    0.05167    0.03276 =
         0.06195    0.00230    0.01866   -0.00739
AFIX  43
H27   2    0.801113    0.018215    0.282818    11.00000   -1.20000
AFIX   0
O3    4    0.572804    0.363135   -0.092314    11.00000    0.07229    0.05039 =
         0.10332    0.01017    0.04250    0.01830
C29   1    0.951336    0.364450   -0.186636    11.00000    0.04708    0.04677 =
         0.07847    0.03077    0.00834   -0.00338
AFIX  43
H29   2    0.935509    0.408441   -0.207248    11.00000   -1.20000
AFIX   0
O4    4    0.632454    0.425229   -0.190003    11.00000    0.12331    0.10713 =
         0.13538    0.07867    0.06632    0.07944
C32   1    0.667928   -0.033076    0.448904    11.00000    0.07272    0.04809 =
         0.04521    0.00127    0.00432   -0.00045
AFIX  43
H32   2    0.689853   -0.026447    0.507849    11.00000   -1.20000
AFIX   0
C33   1    0.289315    0.039498    0.108274    11.00000    0.04089    0.04444 =
         0.06033    0.00391    0.02008   -0.00510
AFIX 137
H33A  2    0.244972   -0.005643    0.095138    11.00000   -1.50000
H33B  2    0.216137    0.070355    0.068196    11.00000   -1.50000
H33C  2    0.280639    0.050962    0.165386    11.00000   -1.50000
AFIX   0
C34   1    0.538457   -0.078352    0.409096    11.00000    0.06678    0.04984 =
         0.04612    0.00644    0.01866   -0.00891
AFIX  43
H34   2    0.472517   -0.102938    0.441325    11.00000   -1.20000
AFIX   0
C35   1    0.137599    0.362624    0.222968    11.00000    0.06785    0.06268 =
         0.04807   -0.00102    0.02330    0.02862
AFIX  23
H35A  2    0.213589    0.384192    0.273236    11.00000   -1.20000
H35B  2    0.075684    0.324767    0.242439    11.00000   -1.20000
AFIX   0
C37   1    1.121331    0.263245   -0.162342    11.00000    0.03421    0.05542 =
         0.06877    0.02017    0.01929    0.00556
AFIX  43
H37   2    1.223306    0.238127   -0.167705    11.00000   -1.20000
AFIX   0
C38   1    1.100329    0.328486   -0.194265    11.00000    0.04040    0.06879 =
         0.09628    0.04491    0.02652   -0.00051
AFIX  43
H38   2    1.187460    0.347193   -0.220519    11.00000   -1.20000
AFIX   0
C42   1    0.401137    0.371748    0.149899    11.00000    0.07370    0.04691 =
         0.08125   -0.02168    0.03375   -0.00882
AFIX  43
H42   2    0.438489    0.415261    0.167600    11.00000   -1.20000
AFIX   0
HKLF 4

REM  XIAO1 in P2(1)/n
REM R1 =  0.0371 for    3472 Fo > 4sig(Fo)  and  0.0433 for all    4045 data
REM    327 parameters refined using      0 restraints

END

WGHT      0.0415      0.5114

REM Highest difference peak  0.558,  deepest hole -1.267,  1-sigma level  0.108
Q1    1   0.3583  0.1917 -0.0819  11.00000  0.05    0.56
Q2    1   0.5760  0.1903  0.0035  11.00000  0.05    0.53
Q3    1   0.5325  0.1883  0.0978  11.00000  0.05    0.50
Q4    1   0.5607  0.1253  0.1049  11.00000  0.05    0.44
Q5    1   1.3316  0.2539 -0.0869  11.00000  0.05    0.43
Q6    1   0.3240  0.1913  0.0123  11.00000  0.05    0.43
Q7    1   0.4403  0.1995 -0.0965  11.00000  0.05    0.43
Q8    1   0.2294  0.1633 -0.1217  11.00000  0.05    0.36
Q9    1   0.3411  0.1298 -0.0903  11.00000  0.05    0.34
Q10   1   1.2732  0.1851 -0.1384  11.00000  0.05    0.33
Q11   1   0.5789  0.2245  0.1571  11.00000  0.05    0.31
Q12   1   0.8271  0.2231  0.0043  11.00000  0.05    0.31
Q13   1   0.6201  0.2322  0.0128  11.00000  0.05    0.31
Q14   1   0.6954  0.2353  0.0428  11.00000  0.05    0.30
Q15   1   0.4515  0.2239 -0.0432  11.00000  0.05    0.30
Q16   1   0.5511  0.2545  0.1034  11.00000  0.05    0.30
Q17   1   1.1779  0.1960 -0.2416  11.00000  0.05    0.29
Q18   1   0.9930  0.3175 -0.3336  11.00000  0.05    0.29
Q19   1   0.6680  0.1765  0.1453  11.00000  0.05    0.28
Q20   1   0.5292  0.2052 -0.1810  11.00000  0.05    0.28
;
_shelx_res_checksum               90375
_shelx_hkl_file
;
   0   2   0  831.70    6.75
   0   3   0    0.50    0.13
   0   4   0   48.46    1.01
   0   4   0   45.29    1.05
   0   5   0    0.27    0.17
   0   5   0    0.20    0.15
   0   6   0  159.84    2.24
   0   6   0  156.29    2.38
   0   7   0    0.20    0.22
   0   7   0    0.34    0.21
   0   8   0   30.31    1.17
   0   8   0   27.84    1.18
   0   9   0    0.06    0.26
   0   9   0    0.24    0.23
   0  10   0   21.67    1.13
   0  10   0   18.79    1.11
   0  11   0   -0.01    0.37
   0  11   0   -0.03    0.25
   0  12   0   21.45    1.25
   0  12   0   19.47    1.26
   0  13   0   -0.10    0.36
   0  13   0   -0.08    0.27
   0  14   0    2.64    0.69
   0  14   0    1.85    0.61
   0  15   0   -0.14    0.39
   0  15   0    0.07    0.38
   0  16   0  169.66    3.92
   0  16   0  146.64    3.94
   0  17   0    0.20    0.48
   0  17   0    0.62    0.48
   0  18   0   39.62    2.11
   0  18   0   33.93    2.08
   0  19   0   -0.16    0.57
   0  19   0   -0.27    0.43
   0  20   0    0.12    0.53
   0  21   0    0.54    0.66
   0  22   0   55.66    3.04
   0  23   0    0.25    0.59
   0  24   0   20.35    2.07
   0  25   0   -0.17    0.62
   0  26   0   33.83    2.75
  -2   0   1    0.46    0.25
  -2   0   1    0.28    0.31
  -2  -1   1  458.73    4.06
  -2  -1   1  405.33    3.83
  -2   1   1  451.81    3.93
  -2   1   1  329.55    3.39
   2   2  -1   23.69    0.96
   2   2  -1   23.54    0.95
  -2   2   1   25.45    0.94
  -2   2   1   16.93    0.86
   2   3  -1  250.77    3.17
   2   3  -1  236.74    3.07
  -2   3   1  260.15    3.00
   2   4  -1  303.72    3.63
  -2   4   1  322.72    3.43
   2   5  -1  457.06    4.65
  -2   5   1  500.60    4.43
  -2   5   1  433.11    4.37
   2   6  -1    9.63    0.78
  -2   6   1    7.30    0.66
  -2   6   1    6.65    0.65
   2   7  -1  187.48    3.23
  -2   7   1  194.99    2.95
  -2   7   1  179.43    3.07
   2   8  -1   48.63    1.75
  -2   8   1   50.65    1.61
  -2   8   1   47.36    1.68
   2   9  -1    1.68    0.49
  -2   9   1    1.82    0.49
  -2   9   1    2.07    0.50
   2  10  -1   39.24    1.72
  -2  10   1   42.98    1.63
  -2  10   1   38.94    1.67
   2  11  -1  159.78    3.49
  -2  11   1  172.50    3.28
  -2  11   1  156.03    3.42
   2  12  -1  210.69    4.15
   2  12  -1  180.42    3.98
  -2  12   1  226.65    3.91
  -2  12   1  208.12    4.11
   2  13  -1  162.01    3.76
   2  13  -1  145.58    3.72
  -2  13   1  169.11    3.52
  -2  13   1  160.45    3.75
   2  14  -1  238.41    4.71
   2  14  -1  208.61    4.62
  -2  14   1  247.43    4.40
  -2  14   1  225.78    4.62
   2  15  -1   43.74    2.16
   2  15  -1   38.53    2.11
  -2  15   1   47.40    2.09
  -2  15   1   41.08    2.12
   2  16  -1   12.84    1.33
   2  16  -1   12.99    1.33
  -2  16   1   14.51    1.33
  -2  16   1   13.10    1.33
   2  17  -1   44.43    2.33
   2  17  -1   38.13    2.24
  -2  17   1   50.89    2.29
  -2  17   1   42.86    2.30
   2  18  -1   13.78    1.44
   2  18  -1   13.33    1.43
  -2  18   1   14.87    1.49
   2  19  -1    9.54    1.44
   2  19  -1    8.89    1.35
  -2  19   1    8.66    1.33
   2  20  -1   32.44    2.23
   2  20  -1   30.59    2.23
  -2  20   1   30.15    2.17
   2  21  -1   33.68    2.36
   2  21  -1   27.66    2.19
  -2  21   1   28.88    2.20
   2  22  -1   20.85    1.99
  -2  22   1   21.44    1.98
   2  23  -1    1.63    0.92
  -2  23   1    1.27    0.90
   2  24  -1   -0.56    0.61
  -2  24   1    0.17    0.66
   2  25  -1    0.01    0.74
  -2  25   1    0.97    0.83
  -4   0   2  133.62    3.06
  -4   0   2  109.93    2.83
  -4  -1   2  605.93    6.54
  -4  -1   2  511.94    6.04
  -4   1   2  606.19    6.44
  -4   1   2  463.29    5.69
  -4  -2   2   12.64    1.09
  -4  -2   2   12.41    1.14
  -4   2   2   13.59    1.07
  -4   2   2   10.47    1.07
   4   3  -2   14.23    1.13
   4   3  -2   15.07    1.14
  -4   3   2   14.15    1.09
  -4   3   2   11.84    1.11
   4   4  -2    1.99    0.58
   4   4  -2    1.86    0.54
  -4   4   2    1.59    0.51
  -4   4   2    0.72    0.55
   4   5  -2   43.47    1.91
   4   5  -2   45.17    1.93
  -4   5   2   44.84    1.81
  -4   5   2   31.63    1.67
   4   6  -2    3.60    0.72
  -4   6   2    3.87    0.72
  -4   6   2    2.85    0.73
   4   7  -2  312.46    5.23
  -4   7   2  333.94    4.92
  -4   7   2  230.03    4.32
   4   8  -2    0.95    0.56
  -4   8   2    0.31    0.44
  -4   8   2    0.40    0.59
   4   9  -2  222.78    4.64
  -4   9   2  238.49    4.30
  -4   9   2  179.19    4.00
   4  10  -2    1.99    0.69
  -4  10   2    1.96    0.65
  -4  10   2    1.09    0.62
   4  11  -2   21.72    1.62
  -4  11   2   24.87    1.56
  -4  11   2   17.45    1.46
   4  12  -2    0.22    0.55
  -4  12   2   -0.10    0.47
  -4  12   2    0.15    0.51
   4  13  -2   41.13    2.30
  -4  13   2   44.32    2.13
  -4  13   2   34.57    2.04
   4  14  -2    4.75    1.09
  -4  14   2    4.06    0.96
  -4  14   2    3.91    0.97
   4  15  -2   65.43    2.98
  -4  15   2   70.22    2.77
  -4  15   2   56.12    2.67
   4  16  -2   25.71    2.01
  -4  16   2   22.81    1.83
   4  17  -2  115.00    4.09
   4  17  -2   96.77    3.84
  -4  17   2  100.05    3.73
   4  18  -2    6.44    1.35
   4  18  -2    4.95    1.11
  -4  18   2    5.15    1.18
   4  19  -2   13.62    1.68
   4  19  -2   11.75    1.64
  -4  19   2   10.03    1.54
   4  20  -2    4.20    1.27
   4  20  -2    3.41    1.09
  -4  20   2    2.02    0.98
   4  21  -2    0.15    0.83
   4  21  -2    1.04    0.79
  -4  21   2   -0.01    0.75
   4  22  -2    0.30    0.94
   4  22  -2   -0.23    0.60
  -4  22   2   -0.15    0.68
   4  23  -2    9.60    1.72
  -4  23   2    9.83    1.73
   4  24  -2    3.07    1.24
  -6   0   3    0.55    0.56
  -6   0   3   -0.56    0.57
  -6  -1   3   15.44    1.43
  -6  -1   3   15.35    1.54
  -6   1   3   16.68    1.46
  -6   1   3   14.39    1.53
   6   2  -3   68.17    2.85
   6   2  -3   62.10    2.71
  -6   2   3   68.16    2.76
  -6   2   3   51.15    2.53
   6   3  -3   60.83    2.74
   6   3  -3   55.58    2.60
  -6   3   3   62.08    2.64
  -6   3   3   46.03    2.42
   6   4  -3  211.54    5.04
   6   4  -3  201.63    4.91
  -6   4   3  217.39    4.86
  -6   4   3  157.14    4.26
   6   5  -3  154.06    4.37
   6   5  -3  140.33    4.16
  -6   5   3  159.01    4.18
  -6   5   3  113.59    3.68
   6   6  -3   38.81    2.30
   6   6  -3   41.57    2.35
  -6   6   3   45.47    2.31
  -6   6   3   30.25    2.10
   6   7  -3    0.89    0.76
  -6   7   3    2.06    0.84
  -6   7   3    0.97    0.79
   6   8  -3    8.60    1.36
  -6   8   3   10.57    1.39
  -6   8   3    6.20    1.22
   6   9  -3    3.02    0.95
  -6   9   3    2.52    0.85
  -6   9   3    0.92    0.85
   6  10  -3   18.74    1.77
  -6  10   3   21.58    1.71
  -6  10   3   12.94    1.60
   6  11  -3    0.51    0.68
  -6  11   3    0.00    0.60
  -6  11   3    0.40    0.79
   6  12  -3   83.23    3.62
  -6  12   3   86.27    3.29
  -6  12   3   55.83    2.91
   6  13  -3   10.33    1.66
  -6  13   3    7.77    1.45
   6  14  -3   51.20    3.00
  -6  14   3   34.64    2.42
   6  15  -3    0.25    0.78
  -6  15   3    0.13    0.85
   6  16  -3    0.65    0.94
  -6  16   3    0.35    0.84
   6  17  -3    5.74    1.47
  -6  17   3    2.89    1.19
   6  18  -3    9.84    1.85
  -6  18   3    8.69    1.65
   6  19  -3    6.63    1.61
  -6  19   3    5.88    1.49
   6  20  -3   17.75    2.21
   8   0  -4  148.88    4.93
   8   0  -4  136.52    4.71
  -8   0   4  114.20    4.35
   8  -1  -4   17.04    1.89
   8  -1  -4   15.83    1.72
   8   1  -4   18.24    1.95
   8   1  -4   18.52    1.86
  -8   1   4   15.74    1.83
   8   2  -4   31.79    2.48
   8   2  -4   34.52    2.46
  -8   2   4   30.82    2.32
  -8   2   4   27.57    2.26
   8   3  -4    9.77    1.70
   8   3  -4   10.23    1.58
  -8   3   4   13.21    1.77
  -8   3   4    7.60    1.47
   8   4  -4    0.12    0.80
   8   4  -4    0.02    0.71
  -8   4   4    0.95    0.81
  -8   4   4   -0.04    0.69
   8   5  -4    0.48    0.90
   8   5  -4   -0.48    0.60
  -8   5   4    1.01    0.87
  -8   5   4    0.76    0.81
   8   6  -4   40.48    2.76
  -8   6   4   47.84    2.82
  -8   6   4   41.04    2.73
   8   7  -4    2.91    1.16
  -8   7   4    3.33    1.11
  -8   7   4    2.09    1.07
   8   8  -4   39.53    2.81
  -8   8   4   47.46    2.84
  -8   8   4   34.20    2.57
   8   9  -4   -0.14    0.81
  -8   9   4    0.21    0.79
  -8   9   4   -0.25    0.76
   8  10  -4   26.99    2.44
  -8  10   4   20.52    2.13
   8  11  -4    2.93    1.21
  -8  11   4    1.75    1.13
   8  12  -4   -0.47    0.86
  -8  12   4    0.62    0.94
   8  13  -4    0.18    1.01
  -8  13   4   -0.09    0.90
  -8  14   4    6.55    1.63
  -8  15   4    0.17    1.05
   1  26   0    1.61    1.07
  -1  26   1   11.80    1.85
   1  25   0   -0.27    0.72
  -1  25   1    6.24    1.43
   1  24   0    0.28    0.68
  -1  24   1   32.82    2.51
   1  23   0   10.01    1.61
  -1  23   1    4.32    1.19
   1  22   0    6.00    1.27
  -1  22   1   22.79    2.01
   1  21   0   99.80    3.93
  -1  21   1   -0.01    0.60
   1  20   0    5.36    1.19
   1  20   0    3.94    1.03
  -1  20   1   35.79    2.32
   1  19   0   39.93    2.29
   1  19   0   34.73    2.21
  -1  19   1    8.23    1.25
   1  18   0    2.42    0.83
   1  18   0    1.79    0.70
  -1  18   1   69.26    2.75
  -1  18   1   60.93    2.74
   1  17   0    3.07    0.86
   1  17   0    0.74    0.54
  -1  17   1    1.16    0.67
  -1  17   1    0.64    0.51
   1  16   0    5.05    1.00
   1  16   0    2.86    0.74
  -1  16   1  222.73    4.49
  -1  16   1  200.95    4.56
   1  15   0   41.30    2.03
   1  15   0   35.46    1.93
  -1  15   1   33.25    1.76
  -1  15   1   28.40    1.72
   1  14   0   86.94    2.76
   1  14   0   78.73    2.72
  -1  14   1   44.02    1.91
  -1  14   1   40.74    1.95
   1  13   0  210.44    4.09
   1  13   0  188.05    4.01
  -1  13   1    6.48    0.91
  -1  13   1    4.85    0.79
   1  12   0   43.96    1.86
   1  12   0   38.59    1.78
  -1  12   1    3.55    0.68
  -1  12   1    2.50    0.60
   1  11   0  427.86    5.36
   1  11   0  389.61    5.28
  -1  11   1    3.96    0.63
  -1  11   1    4.05    0.67
   1  10   0   54.62    1.87
   1  10   0   50.05    1.82
  -1  10   1  581.03    5.66
  -1  10   1  549.38    5.77
   1   9   0   67.35    1.96
   1   9   0   59.94    1.88
  -1   9   1    6.35    0.65
  -1   9   1    6.42    0.66
   1   8   0  109.94    2.37
  -1   8   1  601.63    5.22
  -1   8   1  565.18    5.24
   1   7   0  628.85    5.39
  -1   7   1  339.14    3.68
  -1   7   1  321.31    3.69
   1   6   0   56.51    1.53
  -1   6   1  478.63    4.15
  -1   6   1  459.70    4.14
   1   5   0  352.28    3.55
  -1   5   1  564.30    4.29
  -1   5   1  534.08    4.17
   1   4   0   12.40    0.65
  -1   4   1  335.59    3.06
  -1   4   1  323.32    2.97
   1   3   0   68.11    1.34
  -1   3   1  359.01    3.00
   1   2   0   83.30    1.36
  -1   2   1   26.14    0.73
   1   1   0  631.24    4.01
   1   1   0  581.78    3.80
  -1   1   1  118.56    1.51
  -1   0   1  451.84    3.22
  -1   0   0    0.44    0.13
  -1  -1   1  112.86    1.49
  -1   1   0  657.95    4.12
   1   2  -1   24.03    0.72
   1   2  -1   22.88    0.69
  -1   2   0   92.21    1.25
   1   3  -1  347.79    3.01
  -1   3   0   72.07    1.15
  -1   3   0   79.07    1.43
   1   4  -1  314.09    3.03
  -1   4   0   13.34    0.57
  -1   4   0   13.01    0.65
   1   5  -1  532.62    4.26
  -1   5   0  669.50    4.40
  -1   5   0  630.27    4.79
   1   6  -1  448.00    4.12
  -1   6   0   60.96    1.36
  -1   6   0   58.71    1.55
   1   7  -1  321.19    3.69
  -1   7   0  675.13    4.92
  -1   7   0  637.55    5.46
   1   8  -1  584.44    5.27
   1   8  -1  536.28    5.43
  -1   8   0  118.07    2.15
  -1   8   0  110.28    2.40
   1   9  -1    5.85    0.67
   1   9  -1    5.96    0.66
  -1   9   0   70.64    1.78
  -1   9   0   64.60    1.95
   1  10  -1  565.27    5.70
   1  10  -1  518.27    5.92
  -1  10   0   56.69    1.70
  -1  10   0   55.21    1.91
   1  11  -1    3.32    0.62
   1  11  -1    2.55    0.56
  -1  11   0  441.65    4.90
  -1  11   0  415.28    5.42
   1  12  -1    2.59    0.63
   1  12  -1    2.37    0.60
  -1  12   0   40.82    1.61
  -1  12   0   40.46    1.82
   1  13  -1    6.49    0.91
   1  13  -1    5.91    0.88
  -1  13   0  215.29    3.76
  -1  13   0  202.58    4.15
   1  14  -1   42.71    1.93
   1  14  -1   37.99    1.95
  -1  14   0   91.96    2.59
  -1  14   0   78.30    2.71
   1  15  -1   30.04    1.70
   1  15  -1   25.06    1.68
  -1  15   0   43.32    1.91
  -1  15   0   38.26    2.01
   1  16  -1  217.35    4.51
   1  16  -1  190.41    4.61
  -1  16   0    6.21    0.98
  -1  16   0    5.78    1.01
   1  17  -1    1.08    0.67
   1  17  -1    0.35    0.46
  -1  17   0    0.57    0.58
  -1  17   0    1.29    0.63
   1  18  -1   66.49    2.73
   1  18  -1   58.01    2.76
  -1  18   0    2.07    0.74
   1  19  -1    8.85    1.30
   1  19  -1    9.05    1.35
  -1  19   0   35.68    2.25
   1  20  -1   35.36    2.34
  -1  20   0    4.76    1.09
   1  21  -1    0.87    0.76
  -1  21   0  108.08    4.08
   1  22  -1   20.02    1.94
  -1  22   0    5.57    1.27
   1  23  -1    4.87    1.30
  -1  23   0    8.41    1.50
   1  24  -1   32.51    2.57
  -1  24   0   -0.02    0.63
   1  25  -1    8.11    1.67
  -1  25   0    0.32    0.73
   1  26  -1   13.83    2.10
  -1  26   0    0.71    0.92
   3  25  -1   16.43    2.02
   3  24  -1   12.99    1.94
   3  23  -1   13.62    1.91
  -3  23   2    1.35    0.96
   3  22  -1    1.98    1.10
   3  22  -1    0.90    0.78
  -3  22   2   42.24    2.74
   3  21  -1    0.26    0.88
   3  21  -1    1.52    0.84
  -3  21   2   43.81    2.70
   3  20  -1    9.36    1.56
   3  20  -1    7.14    1.31
  -3  20   2   68.89    3.24
   3  19  -1    5.10    1.23
   3  19  -1    3.21    0.95
  -3  19   2    4.32    1.06
   3  18  -1    3.34    1.06
   3  18  -1    3.14    0.95
  -3  18   2   45.92    2.51
   3  17  -1  115.10    3.87
   3  17  -1  107.00    3.82
  -3  17   2    2.60    0.86
   3  16  -1    6.47    1.18
   3  16  -1    4.82    0.98
  -3  16   2    1.39    0.72
  -3  16   2    0.86    0.66
   3  15  -1  160.14    4.31
  -3  15   2   60.61    2.46
  -3  15   2   57.23    2.55
   3  14  -1   56.33    2.53
  -3  14   2    1.92    0.73
  -3  14   2    1.75    0.70
   3  13  -1   32.07    1.89
  -3  13   2   43.62    1.98
  -3  13   2   38.63    1.99
   3  12  -1   -0.14    0.37
  -3  12   2  156.50    3.52
  -3  12   2  132.38    3.43
   3  11  -1   31.58    1.76
  -3  11   2   85.89    2.56
  -3  11   2   80.33    2.61
   3  10  -1    7.04    0.97
  -3  10   2   87.62    2.50
  -3  10   2   74.66    2.44
   3   9  -1  136.62    3.33
  -3   9   2    1.62    0.51
  -3   9   2    0.91    0.48
   3   8  -1  415.18    5.60
  -3   8   2   52.80    1.88
  -3   8   2   43.66    1.77
   3   7  -1  316.89    4.75
  -3   7   2   48.68    1.77
   3   6  -1  162.31    3.30
  -3   6   2  465.56    5.16
  -3   6   2  345.00    4.52
   3   5  -1    6.78    0.77
  -3   5   2   40.49    1.54
  -3   5   2   30.86    1.40
   3   4  -1    2.06    0.50
   3   4  -1    3.55    0.58
  -3   4   2  805.51    6.58
  -3   4   2  568.75    5.53
   3   3  -1  164.39    3.05
   3   3  -1  158.82    3.00
  -3   3   2   23.56    1.16
  -3   3   2   15.87    1.05
   3   2  -1   61.14    1.84
   3   2  -1   59.55    1.81
  -3   2   2  140.59    2.70
  -3   2   2  102.62    2.31
  -3  -2   1   56.19    1.80
  -3   1   2  122.96    2.52
  -3   1   2   93.89    2.21
  -3  -1   1  342.03    4.21
  -3  -1   1  293.56    3.97
  -3   0   2    0.66    0.36
  -3   0   2    0.25    0.33
  -3   0   1  139.17    2.65
  -3   0   1  107.26    2.41
  -3  -1   2  122.95    2.56
  -3  -1   2  109.93    2.42
  -3   1   1  344.37    4.12
  -3   1   1  258.56    3.70
  -3  -2   2  139.72    2.77
  -3   2   1   60.83    1.75
  -3   2   1   44.75    1.62
   3   3  -2   21.53    1.16
   3   3  -2   21.53    1.12
  -3   3   1  171.34    2.90
  -3   3   1  117.48    2.57
   3   4  -2  778.86    6.84
   3   4  -2  751.19    6.70
  -3   4   1    3.09    0.54
  -3   4   1    3.55    0.64
   3   5  -2   39.31    1.62
   3   5  -2   39.28    1.58
  -3   5   1    6.36    0.69
  -3   5   1    4.88    0.72
   3   6  -2  445.94    5.42
  -3   6   1  178.03    3.06
  -3   6   1  135.59    2.94
   3   7  -2   49.99    1.92
  -3   7   1  338.22    4.32
   3   8  -2   50.57    1.98
  -3   8   1  442.38    5.05
  -3   8   1  378.29    5.18
   3   9  -2    1.79    0.56
  -3   9   1  155.17    3.09
  -3   9   1  128.31    3.14
   3  10  -2   88.48    2.74
  -3  10   1    8.74    0.91
  -3  10   1    7.15    0.96
   3  11  -2   83.13    2.74
  -3  11   1   33.07    1.57
  -3  11   1   29.59    1.68
   3  12  -2  140.43    3.64
  -3  12   1    0.28    0.44
  -3  12   1    1.83    0.67
   3  13  -2   39.71    2.06
  -3  13   1   33.17    1.69
  -3  13   1   30.91    1.82
   3  14  -2    2.13    0.78
  -3  14   1   58.16    2.24
  -3  14   1   51.89    2.40
   3  15  -2   64.28    2.73
   3  15  -2   50.73    2.52
  -3  15   1  165.41    3.81
  -3  15   1  142.73    4.02
   3  16  -2    1.43    0.75
   3  16  -2    0.79    0.55
  -3  16   1    5.14    1.03
   3  17  -2    3.20    0.96
   3  17  -2    2.33    0.81
  -3  17   1  115.10    3.84
   3  18  -2   53.27    2.71
   3  18  -2   45.76    2.64
  -3  18   1    1.95    0.79
   3  19  -2    4.55    1.16
   3  19  -2    2.75    0.91
  -3  19   1    4.83    1.11
   3  20  -2   78.22    3.46
   3  20  -2   65.04    3.33
  -3  20   1    7.33    1.32
   3  21  -2   46.87    2.82
   3  21  -2   39.15    2.68
  -3  21   1    0.93    0.73
   3  22  -2   39.17    2.77
  -3  22   1    3.97    1.15
   3  23  -2    0.66    0.79
  -3  23   1   16.10    1.87
   3  24  -2    6.18    1.51
  -3  24   1   11.35    1.80
   3  25  -2    0.26    0.82
   5  22  -2   17.14    2.14
   5  22  -2   15.86    2.13
   5  21  -2    2.22    1.10
   5  21  -2    1.46    0.86
   5  20  -2   35.46    2.71
   5  20  -2   30.51    2.50
  -5  20   3    0.36    0.92
   5  19  -2    0.08    0.77
   5  19  -2    0.02    0.57
  -5  19   3   23.84    2.16
   5  18  -2   11.11    1.73
  -5  18   3    1.01    0.92
   5  17  -2   -0.18    0.68
  -5  17   3   47.53    2.77
   5  16  -2    0.82    0.80
  -5  16   3    0.03    0.69
   5  15  -2    5.74    1.31
  -5  15   3   25.77    2.00
   5  14  -2   60.08    3.00
  -5  14   3    7.07    1.20
  -5  14   3    5.40    1.15
   5  13  -2    1.98    0.90
  -5  13   3   10.66    1.28
  -5  13   3    6.07    1.20
   5  12  -2   97.35    3.62
  -5  12   3   52.04    2.42
  -5  12   3   36.79    2.23
   5  11  -2   16.11    1.59
  -5  11   3   69.07    2.72
  -5  11   3   47.32    2.44
   5  10  -2   79.56    3.15
  -5  10   3    6.64    1.09
  -5  10   3    2.71    0.96
   5   9  -2    9.04    1.27
  -5   9   3  145.56    3.79
  -5   9   3   96.29    3.25
   5   8  -2    1.84    0.77
  -5   8   3   24.05    1.62
  -5   8   3   16.36    1.56
   5   7  -2    0.47    0.55
  -5   7   3  289.25    5.18
  -5   7   3  201.08    4.46
   5   6  -2  246.37    5.05
  -5   6   3   39.31    1.97
  -5   6   3   26.85    1.82
   5   5  -2    6.08    1.03
   5   5  -2    6.79    0.98
  -5   5   3   67.10    2.52
  -5   5   3   43.73    2.15
   5   4  -2  246.61    4.90
   5   4  -2  226.86    4.69
  -5   4   3    1.38    0.59
  -5   4   3    0.28    0.58
   5   3  -2    0.23    0.51
   5   3  -2    0.23    0.42
  -5   3   3   60.83    2.38
  -5   3   3   45.31    2.14
   5   2  -2  142.51    3.63
   5   2  -2  131.59    3.49
  -5   2   3   27.04    1.64
  -5   2   3   20.99    1.58
  -5  -2   2  130.92    3.54
  -5   1   3  176.02    3.97
  -5   1   3  145.10    3.62
  -5  -1   2    0.07    0.45
  -5  -1   2   -0.15    0.56
  -5   0   3    1.23    0.59
  -5   0   3    0.71    0.62
  -5   0   2   -0.16    0.39
  -5   0   2    2.44    0.79
  -5  -1   3  180.57    4.06
  -5  -1   3  158.64    3.81
  -5   1   2   -0.13    0.41
  -5   1   2    0.59    0.66
  -5  -2   3   27.02    1.66
  -5  -2   3   25.75    1.68
  -5   2   2  148.64    3.60
  -5   2   2  109.96    3.22
   5   3  -3   56.68    2.37
   5   3  -3   56.71    2.35
  -5   3   2    0.81    0.53
  -5   3   2    0.41    0.66
   5   4  -3    1.02    0.60
   5   4  -3    0.19    0.40
  -5   4   2  251.55    4.66
  -5   4   2  183.45    4.19
   5   5  -3   64.73    2.62
   5   5  -3   61.12    2.52
  -5   5   2    7.23    1.02
  -5   5   2    4.45    1.01
   5   6  -3   37.71    2.06
   5   6  -3   37.50    2.04
  -5   6   2  258.84    4.76
  -5   6   2  177.16    4.22
   5   7  -3  274.64    5.42
  -5   7   2    0.40    0.53
  -5   7   2   -0.39    0.58
   5   8  -3   21.95    1.68
  -5   8   2    1.65    0.66
  -5   8   2    0.90    0.77
   5   9  -3  137.29    3.99
  -5   9   2   10.27    1.14
  -5   9   2    7.42    1.26
   5  10  -3    5.87    1.12
  -5  10   2   77.55    2.76
  -5  10   2   59.81    2.70
   5  11  -3   62.90    2.86
  -5  11   2   17.64    1.45
  -5  11   2   10.54    1.45
   5  12  -3   50.94    2.65
  -5  12   2   97.06    3.17
  -5  12   2   71.60    3.03
   5  13  -3    9.59    1.49
  -5  13   2    1.53    0.72
  -5  13   2    0.40    0.69
   5  14  -3    6.12    1.27
  -5  14   2   47.83    2.61
   5  15  -3   31.24    2.26
  -5  15   2    2.37    0.95
   5  16  -3    0.69    0.82
  -5  16   2   -0.17    0.69
   5  17  -3   63.29    3.26
  -5  17   2    0.23    0.76
   5  18  -3    1.65    1.00
  -5  18   2    6.66    1.40
   5  19  -3   31.64    2.51
  -5  19   2   -0.21    0.75
   5  20  -3    1.90    1.08
   5  20  -3    1.25    0.80
  -5  20   2   27.56    2.36
   5  21  -3    1.80    1.12
   5  21  -3    0.57    0.74
  -5  21   2    1.00    1.00
   5  22  -3    0.41    1.00
   5  22  -3    0.10    0.64
  -5  22   2   16.23    2.02
   7  16  -3   32.80    2.75
  -7  16   4   -0.23    0.88
   7  15  -3    7.19    1.65
  -7  15   4    7.34    1.60
   7  14  -3   14.63    2.06
  -7  14   4    7.29    1.55
   7  13  -3    0.90    1.00
  -7  13   4   24.31    2.24
   7  12  -3    0.94    1.02
  -7  12   4   24.40    2.20
   7  11  -3    0.45    0.81
  -7  11   4   33.80    2.33
  -7  11   4   20.08    2.01
   7  10  -3   39.08    2.65
  -7  10   4    7.85    1.42
  -7  10   4    4.98    1.29
   7   9  -3    5.52    1.29
  -7   9   4    2.94    0.98
  -7   9   4    2.07    0.97
   7   8  -3   41.46    2.64
  -7   8   4    1.21    0.77
  -7   8   4    2.43    1.00
   7   7  -3   14.31    1.64
  -7   7   4   31.00    2.15
  -7   7   4   22.40    1.96
   7   6  -3   31.75    2.31
  -7   6   4   53.84    2.77
  -7   6   4   40.91    2.52
   7   5  -3    4.54    1.24
   7   5  -3    4.64    1.11
  -7   5   4   82.29    3.36
  -7   5   4   63.74    3.05
   7   4  -3   13.41    1.60
   7   4  -3   12.67    1.49
  -7   4   4   75.91    3.23
  -7   4   4   57.61    2.88
   7   3  -3   66.12    3.12
   7   3  -3   65.65    3.08
  -7   3   4   21.69    1.82
  -7   3   4   18.60    1.77
   7   2  -3   19.74    1.84
   7   2  -3   17.66    1.67
  -7   2   4    3.53    1.00
  -7   2   4    2.95    1.02
   7   1  -3  229.17    5.58
   7   1  -3  220.90    5.48
  -7   1   4   15.66    1.60
  -7   1   4   12.70    1.52
  -7  -1   3  185.44    5.08
   7   0  -3   41.00    2.47
   7   0  -3   38.42    2.37
  -7   0   4   -0.33    0.57
  -7   0   4    0.02    0.67
  -7   0   3   29.95    2.20
  -7  -1   4   14.72    1.55
   7   1  -4   14.75    1.63
   7   1  -4   14.06    1.52
  -7   1   3  219.92    5.38
  -7   1   3  183.17    5.03
   7   2  -4    3.63    1.11
   7   2  -4    2.90    0.97
  -7   2   3   20.85    1.78
  -7   2   3   16.39    1.74
   7   3  -4   24.46    2.01
   7   3  -4   22.49    1.87
  -7   3   3   70.31    3.07
  -7   3   3   58.06    2.92
   7   4  -4   80.35    3.47
   7   4  -4   75.20    3.32
  -7   4   3   14.06    1.50
  -7   4   3    9.17    1.47
   7   5  -4   84.57    3.59
   7   5  -4   80.37    3.49
  -7   5   3    5.65    1.17
  -7   5   3    3.13    1.07
   7   6  -4   52.14    2.89
   7   6  -4   46.90    2.72
  -7   6   3   38.49    2.33
  -7   6   3   27.15    2.13
   7   7  -4   30.54    2.27
  -7   7   3   16.01    1.61
  -7   7   3   13.30    1.73
   7   8  -4    1.81    0.97
  -7   8   3   47.76    2.61
  -7   8   3   30.85    2.31
   7   9  -4    2.89    1.10
  -7   9   3    8.91    1.40
  -7   9   3    4.10    1.21
   7  10  -4    7.42    1.49
  -7  10   3   48.21    2.64
  -7  10   3   31.46    2.38
   7  11  -4   29.62    2.38
  -7  11   3    1.16    1.00
   7  12  -4   36.74    2.66
  -7  12   3   -0.07    0.80
   7  13  -4   34.66    2.66
  -7  13   3   -0.45    0.82
   7  14  -4    9.31    1.74
  -7  14   3   11.13    1.83
   7  15  -4   10.93    1.92
  -7  15   3    6.00    1.53
   7  16  -4    0.11    0.96
  -7  16   3   23.38    2.35
   7  17  -4    4.55    1.50
  -7  17   3    6.84    1.65
  -7  18   3   13.17    2.14
  -9  10   5   16.85    2.11
  -9   9   5   -0.08    0.87
  -9   8   5   57.22    3.40
  -9   8   5   43.01    3.04
   9   7  -4   -0.99    0.80
  -9   7   5   -0.15    0.88
  -9   7   5   -0.24    0.79
   9   6  -4    1.01    1.06
  -9   6   5   33.16    2.64
  -9   6   5   25.98    2.41
  -9   5   5    0.42    0.88
  -9   5   5    0.46    0.90
   9   4  -4    0.78    1.01
  -9   4   5   -0.01    0.82
  -9   4   5    0.18    0.87
   9   3  -4   23.64    2.28
  -9   3   5   -0.13    0.77
  -9   3   5    0.26    0.81
   9   2  -4   -0.35    0.85
   9   2  -4   -0.16    0.80
  -9   2   5    9.44    1.70
   9  -2  -5   10.05    1.84
   9  -2  -5    7.85    1.51
   9   1  -4    1.32    1.12
   9   1  -4    2.63    1.09
   9  -1  -5    3.07    1.29
   9  -1  -5    5.43    1.33
   9   0  -4    0.48    1.00
   9   0  -4    0.50    0.85
   9   0  -5   42.39    2.91
   9  -1  -4    1.33    1.07
   9  -1  -4    4.18    1.22
   9   1  -5    2.97    1.27
   9   1  -5    4.92    1.32
  -9   1   4    4.24    1.34
   9  -2  -4   -0.83    0.75
   9  -2  -4    0.01    0.67
   9   2  -5    7.53    1.51
  -9   2   4   -0.25    0.74
   9  -3  -4   26.69    2.41
   9  -3  -4   24.99    2.25
   9   3  -5    0.36    0.95
   9   3  -5   -0.15    0.72
  -9   3   4   20.61    2.16
   9  -4  -4    3.02    1.29
   9  -4  -4    1.58    0.99
   9   4  -5   -0.27    0.87
   9   4  -5    0.53    0.84
  -9   4   4    1.93    1.15
   9   5  -5   -0.21    0.90
  -9   5   4   18.13    2.00
  -9   5   4   13.45    1.97
  -9   6   4    2.23    1.14
  -9   6   4    1.10    0.99
  -9   7   4    0.10    0.86
  -9   7   4   -0.36    0.78
  -9   8   4    0.26    0.89
  -9   9   4   11.55    1.93
  -9  10   4    0.79    1.03
   0  26   1    0.13    0.74
   0  25   1   -0.08    0.67
   0  24   1    1.36    0.85
   0  23   1   34.64    2.49
   0  22   1    0.81    0.74
   0  21   1  101.83    3.89
   0  20   1    3.23    1.01
   0  20   1    3.64    0.99
   0  19   1   56.78    2.65
   0  19   1   57.98    2.77
   0  18   1   -0.18    0.51
   0  18   1    0.06    0.44
   0  17   1    4.64    0.97
   0  17   1    3.08    0.82
   0  16   1    0.14    0.52
   0  16   1    0.26    0.44
   0  15   1   49.00    2.14
   0  15   1   43.52    2.07
   0  14   1    4.72    0.86
   0  14   1    3.23    0.70
   0  13   1  247.41    4.34
   0  13   1  227.79    4.25
   0  12   1   23.70    1.36
   0  12   1   20.92    1.28
   0  11   1  255.05    4.04
   0  11   1  228.97    3.86
   0  10   1    1.96    0.49
   0  10   1    1.27    0.38
   0   9   1   11.94    0.87
   0   9   1   10.18    0.78
   0   8   1    2.21    0.47
   0   8   1    2.03    0.40
   0   7   1  366.99    3.92
   0   7   1  346.61    3.71
   0   6   1    0.56    0.25
   0   6   1    0.31    0.17
   0   5   1  812.90    5.27
   0   5   1  785.24    4.89
   0   4   1    2.69    0.32
   0   3   1  405.70    3.12
   0   2   1    3.82    0.26
   0   0   1    0.00    0.03
   0   2  -1   28.42    0.50
   0   3  -1  495.29    3.58
   0   4  -1    4.20    0.29
   0   4  -1    3.78    0.35
   0   5  -1  840.67    4.89
   0   5  -1  774.13    5.24
   0   6  -1    0.59    0.22
   0   6  -1    0.40    0.20
   0   7  -1  379.38    3.52
   0   7  -1  356.06    4.04
   0   8  -1    1.76    0.37
   0   8  -1    1.48    0.38
   0   9  -1   10.37    0.74
   0   9  -1    9.52    0.79
   0  10  -1    2.46    0.49
   0  10  -1    0.84    0.36
   0  11  -1  254.24    3.69
   0  11  -1  231.30    4.08
   0  12  -1   25.26    1.30
   0  12  -1   22.32    1.37
   0  13  -1  244.29    3.99
   0  13  -1  220.01    4.35
   0  14  -1    4.59    0.78
   0  14  -1    4.12    0.79
   0  15  -1   50.55    2.05
   0  15  -1   43.54    2.15
   0  16  -1   -0.23    0.44
   0  16  -1    0.27    0.45
   0  17  -1    4.47    0.90
   0  17  -1    3.08    0.83
   0  18  -1    0.58    0.55
   0  19  -1   55.87    2.80
   0  20  -1    4.88    1.16
   0  21  -1   97.96    3.91
   0  22  -1    0.97    0.76
   0  23  -1   30.25    2.41
   0  24  -1    0.22    0.74
   0  25  -1    0.19    0.68
   0  26  -1    0.76    0.84
   2  25   0    8.45    1.67
   2  24   0   15.17    1.84
  -2  24   2   11.33    1.71
   2  23   0   11.39    1.73
  -2  23   2    7.92    1.43
   2  22   0   19.85    1.97
   2  22   0   17.44    1.83
  -2  22   2    6.49    1.32
   2  21   0    0.42    0.81
   2  21   0    0.41    0.67
  -2  21   2    4.77    1.13
   2  20   0    2.83    1.03
   2  20   0    2.36    0.89
  -2  20   2    5.46    1.14
   2  19   0    2.69    0.97
   2  19   0    2.42    0.88
  -2  19   2   30.34    2.07
   2  18   0   61.76    2.84
   2  18   0   55.69    2.74
  -2  18   2   11.83    1.35
  -2  18   2   10.68    1.29
   2  17   0   38.39    2.21
   2  17   0   32.37    2.05
  -2  17   2   63.78    2.64
  -2  17   2   55.40    2.56
   2  16   0   63.60    2.70
   2  16   0   60.57    2.67
  -2  16   2   97.06    3.11
  -2  16   2   86.13    3.05
   2  15   0   85.38    3.02
   2  15   0   77.83    2.91
  -2  15   2  105.95    3.14
  -2  15   2  105.14    3.23
   2  14   0   50.46    2.27
   2  14   0   44.43    2.14
  -2  14   2   35.62    1.84
  -2  14   2   31.80    1.77
   2  13   0    1.55    0.66
   2  13   0    0.88    0.49
  -2  13   2   37.91    1.82
  -2  13   2   36.80    1.82
   2  12   0   20.09    1.39
  -2  12   2    0.38    0.45
  -2  12   2    0.71    0.45
   2  11   0   81.01    2.56
  -2  11   2   46.99    1.85
  -2  11   2   44.73    1.81
   2  10   0  181.91    3.66
  -2  10   2  446.98    5.32
  -2  10   2  420.51    5.20
   2   9   0   86.94    2.45
  -2   9   2  356.56    4.58
  -2   9   2  327.29    4.38
   2   8   0  629.73    6.30
  -2   8   2  339.20    4.29
  -2   8   2  315.27    4.10
   2   7   0  369.97    4.63
  -2   7   2  119.47    2.45
  -2   7   2  110.90    2.32
   2   6   0   18.34    1.06
  -2   6   2  453.08    4.60
  -2   6   2  414.43    4.28
   2   5   0    9.19    0.73
  -2   5   2   58.16    1.60
  -2   5   2   48.90    1.42
   2   4   0  245.99    3.31
  -2   4   2    8.64    0.70
  -2   4   2    8.12    0.67
   2   3   0    1.33    0.33
  -2   3   2   31.16    1.12
  -2   3   2   23.53    0.96
   2   2   0  391.47    3.85
   2   2   0  352.67    3.65
  -2   2   2   78.16    1.70
  -2   2   2   56.65    1.40
  -2  -2   0  346.31    3.67
   2   1   0   47.94    1.29
   2   1   0   46.27    1.26
  -2   1   2  211.49    2.75
  -2   1   2  166.65    2.33
  -2  -1   0   21.56    0.95
  -2   0   2   13.99    0.75
  -2   0   2   12.31    0.74
  -2   0   0  333.78    3.33
  -2   0   0  246.48    3.01
  -2  -1   2  212.99    2.79
  -2  -1   2  198.11    2.62
  -2   1   0   51.76    1.28
  -2   1   0   36.42    1.24
  -2  -2   2   79.79    1.74
  -2   2   0  405.75    3.58
  -2   2   0  281.47    3.29
  -2  -3   2   28.99    1.09
   2   3  -2   25.59    1.02
  -2   3   0    1.13    0.29
  -2   3   0    1.90    0.41
   2   4  -2   10.26    0.75
   2   4  -2    9.97    0.70
  -2   4   0  271.49    2.96
  -2   4   0  239.90    3.25
   2   5  -2   52.17    1.56
  -2   5   0    8.96    0.63
  -2   5   0    9.35    0.75
   2   6  -2  423.16    4.59
  -2   6   0   20.42    0.92
  -2   6   0   18.42    1.03
   2   7  -2  107.54    2.41
  -2   7   0  391.83    3.94
  -2   7   0  357.42    4.48
   2   8  -2  327.22    4.36
  -2   8   0  670.46    5.41
  -2   8   0  618.13    6.16
   2   9  -2  337.54    4.60
  -2   9   0   91.57    2.09
  -2   9   0   84.07    2.39
   2  10  -2  424.92    5.35
  -2  10   0  199.75    3.21
  -2  10   0  184.10    3.65
   2  11  -2   46.08    1.89
  -2  11   0   86.14    2.23
  -2  11   0   82.76    2.57
   2  12  -2    0.36    0.42
   2  12  -2    0.72    0.43
  -2  12   0   19.87    1.22
  -2  12   0   19.50    1.37
   2  13  -2   37.74    1.86
   2  13  -2   33.01    1.84
  -2  13   0    1.89    0.61
  -2  13   0    1.46    0.59
   2  14  -2   32.84    1.79
   2  14  -2   29.54    1.82
  -2  14   0   56.85    2.09
  -2  14   0   48.58    2.25
   2  15  -2  104.83    3.20
   2  15  -2  102.05    3.41
  -2  15   0   94.57    2.74
  -2  15   0   82.99    3.00
   2  16  -2   91.38    3.09
   2  16  -2   78.53    3.10
  -2  16   0   60.92    2.67
   2  17  -2   58.31    2.59
   2  17  -2   51.78    2.62
  -2  17   0   33.09    2.06
   2  18  -2    9.77    1.36
   2  18  -2    8.11    1.29
  -2  18   0   58.88    2.81
   2  19  -2   32.01    2.12
   2  19  -2   27.98    2.08
  -2  19   0    2.10    0.86
   2  20  -2    3.94    1.07
  -2  20   0    2.83    0.96
   2  21  -2    5.78    1.28
  -2  21   0    0.35    0.65
   2  22  -2    5.21    1.27
  -2  22   0   17.39    1.84
   2  23  -2    5.48    1.32
  -2  23   0   10.86    1.70
   2  24  -2   11.58    1.85
  -2  24   0   15.99    1.89
   2  25  -2   14.15    2.02
  -2  25   0    7.35    1.52
   4  23  -1    3.03    1.31
   4  23  -1    3.04    1.19
   4  22  -1   59.69    3.44
   4  22  -1   44.83    3.02
   4  21  -1    9.24    1.71
   4  21  -1    7.74    1.47
   4  20  -1   67.19    3.47
   4  20  -1   58.31    3.24
  -4  20   3   65.47    3.25
   4  19  -1   15.07    1.76
   4  19  -1   12.79    1.70
  -4  19   3    0.35    0.71
   4  18  -1   24.43    2.09
   4  18  -1   15.72    1.67
  -4  18   3   29.57    2.15
   4  17  -1    4.70    1.20
  -4  17   3    0.62    0.67
   4  16  -1   13.52    1.54
  -4  16   3   23.72    1.82
  -4  16   3   19.19    1.69
   4  15  -1   11.68    1.46
  -4  15   3    1.51    0.79
  -4  15   3    0.74    0.65
   4  14  -1  221.29    5.29
  -4  14   3  151.45    4.00
  -4  14   3  122.73    3.73
   4  13  -1    0.06    0.60
  -4  13   3   26.78    1.80
  -4  13   3   19.24    1.57
   4  12  -1  109.55    3.56
  -4  12   3  268.01    5.04
  -4  12   3  200.23    4.45
   4  11  -1    7.15    1.13
  -4  11   3   16.91    1.40
  -4  11   3   12.86    1.30
   4  10  -1   24.00    1.66
  -4  10   3   15.60    1.29
  -4  10   3    9.94    1.14
   4   9  -1    3.03    0.80
  -4   9   3   18.14    1.35
  -4   9   3   11.80    1.23
   4   8  -1   58.16    2.38
  -4   8   3    1.55    0.59
  -4   8   3    1.76    0.68
   4   7  -1   40.91    1.96
  -4   7   3   22.82    1.41
  -4   7   3   14.05    1.24
   4   6  -1  108.29    3.04
  -4   6   3  194.03    3.82
  -4   6   3  133.38    3.19
   4   5  -1   19.99    1.33
  -4   5   3   10.65    0.98
  -4   5   3    6.69    0.91
   4   4  -1  202.17    3.96
   4   4  -1  200.81    3.95
  -4   4   3  150.38    3.30
  -4   4   3  102.89    2.71
   4   3  -1   33.90    1.65
   4   3  -1   29.90    1.53
  -4   3   3   16.94    1.19
  -4   3   3   12.73    1.12
  -4  -3   1   30.35    1.61
   4   2  -1  143.85    3.23
   4   2  -1  135.57    3.13
  -4   2   3  287.22    4.51
  -4   2   3  220.44    3.88
  -4  -2   1  129.38    3.14
  -4   1   3   75.82    2.36
  -4   1   3   60.83    2.11
  -4  -1   1   81.96    2.42
  -4  -1   1   70.99    2.34
  -4   0   3    0.43    0.44
  -4   0   3    0.19    0.47
  -4   0   1    0.48    0.44
  -4   0   1   -0.18    0.44
  -4  -1   3   74.38    2.36
  -4  -1   3   69.39    2.26
  -4   1   1   85.36    2.41
  -4   1   1   62.62    2.21
  -4  -2   3  283.37    4.57
  -4   2   1  145.27    3.10
  -4   2   1  105.47    2.82
  -4  -3   3   15.76    1.18
  -4   3   1   34.14    1.55
  -4   3   1   25.25    1.52
   4   4  -3  140.24    3.31
   4   4  -3  143.39    3.34
  -4   4   1  218.43    3.77
  -4   4   1  147.69    3.40
   4   5  -3   10.11    1.00
   4   5  -3   10.17    0.97
  -4   5   1   20.02    1.23
  -4   5   1   13.62    1.25
   4   6  -3  182.57    3.92
   4   6  -3  181.14    3.88
  -4   6   1  111.97    2.75
  -4   6   1   78.48    2.58
   4   7  -3   20.07    1.41
  -4   7   1   43.73    1.78
  -4   7   1   32.18    1.77
   4   8  -3    1.21    0.63
  -4   8   1   62.00    2.13
  -4   8   1   44.07    2.07
   4   9  -3   15.04    1.30
  -4   9   1    5.44    0.83
  -4   9   1    3.15    0.82
   4  10  -3   14.35    1.31
  -4  10   1   27.42    1.51
  -4  10   1   19.76    1.53
   4  11  -3   17.24    1.47
  -4  11   1    7.93    0.97
   4  12  -3  253.34    5.27
  -4  12   1  121.37    3.18
  -4  12   1   94.00    3.22
   4  13  -3   23.80    1.78
  -4  13   1   -0.24    0.48
  -4  13   1    0.68    0.65
   4  14  -3  145.76    4.22
  -4  14   1  190.91    4.79
   4  15  -3    1.81    0.83
  -4  15   1    7.34    1.24
   4  16  -3   23.71    1.92
  -4  16   1   11.75    1.45
   4  17  -3    1.25    0.83
   4  17  -3    0.30    0.55
  -4  17   1    3.53    1.04
   4  18  -3   30.95    2.27
   4  18  -3   27.19    2.17
  -4  18   1   18.24    1.80
   4  19  -3   -0.06    0.71
   4  19  -3    0.59    0.65
  -4  19   1   14.73    1.69
   4  20  -3   77.97    3.61
   4  20  -3   66.85    3.51
  -4  20   1   59.67    3.21
   4  21  -3    6.68    1.46
   4  21  -3    7.33    1.48
  -4  21   1    7.74    1.50
   4  22  -3   20.64    2.14
  -4  22   1   48.16    3.09
   4  23  -3    0.52    0.78
  -4  23   1    2.06    1.07
   6  19  -2   16.66    2.08
   6  18  -2    6.17    1.54
   6  17  -2   44.22    3.00
  -6  17   4   24.54    2.21
   6  16  -2    7.27    1.55
  -6  16   4   12.89    1.82
   6  15  -2   78.59    3.75
  -6  15   4   25.10    2.17
   6  14  -2    0.34    0.80
  -6  14   4   26.19    2.15
   6  13  -2    0.75    0.84
  -6  13   4    0.17    0.67
  -6  13   4    0.27    0.81
   6  12  -2    2.37    0.99
  -6  12   4    0.31    0.67
  -6  12   4    0.30    0.75
   6  11  -2   59.08    3.03
  -6  11   4   51.12    2.61
  -6  11   4   35.10    2.30
   6  10  -2   21.05    1.85
  -6  10   4    4.12    0.99
  -6  10   4    2.83    1.00
   6   9  -2  154.07    4.62
  -6   9   4   51.05    2.53
  -6   9   4   36.76    2.29
   6   8  -2   12.13    1.46
  -6   8   4   75.10    3.02
  -6   8   4   50.53    2.59
   6   7  -2  161.01    4.58
  -6   7   4   88.36    3.24
  -6   7   4   59.66    2.75
   6   6  -2   13.91    1.50
  -6   6   4   12.45    1.35
  -6   6   4   10.47    1.44
   6   5  -2   12.48    1.43
  -6   5   4   62.59    2.71
  -6   5   4   46.25    2.41
   6   4  -2    3.12    0.95
   6   4  -2    1.80    0.74
  -6   4   4    0.88    0.60
  -6   4   4    1.25    0.79
   6   3  -2    1.62    0.80
   6   3  -2    0.95    0.62
  -6   3   4   32.80    1.99
  -6   3   4   24.85    1.84
   6   2  -2   25.77    1.80
   6   2  -2   24.92    1.75
  -6   2   4  109.76    3.52
  -6   2   4   84.78    3.12
  -6  -2   2   24.53    1.87
   6   1  -2    5.14    1.06
   6   1  -2    5.44    0.98
  -6   1   4   98.95    3.35
  -6   1   4   84.14    3.12
  -6  -1   2    4.14    1.06
  -6   0   4  165.77    4.34
  -6   0   4  139.55    3.97
  -6   0   2  103.42    3.38
  -6   0   2   95.13    3.37
  -6  -1   4   98.73    3.38
  -6  -1   4   86.26    3.19
  -6   1   2    5.12    1.01
  -6   1   2    3.88    1.07
  -6  -2   4  106.22    3.53
  -6   2   2   26.26    1.75
  -6   2   2   22.29    1.79
   6   3  -4   32.37    2.08
   6   3  -4   30.96    1.97
  -6   3   2    1.67    0.72
  -6   3   2    0.97    0.81
   6   4  -4    1.11    0.77
   6   4  -4    1.01    0.65
  -6   4   2    1.92    0.74
  -6   4   2    0.90    0.84
   6   5  -4   59.33    2.78
   6   5  -4   58.91    2.74
  -6   5   2   13.95    1.36
  -6   5   2    9.10    1.39
   6   6  -4   12.85    1.44
   6   6  -4   11.81    1.31
  -6   6   2   18.04    1.52
  -6   6   2   10.26    1.49
   6   7  -4   83.63    3.34
   6   7  -4   80.73    3.26
  -6   7   2  173.07    4.32
  -6   7   2  117.73    3.87
   6   8  -4   68.85    3.08
  -6   8   2   12.92    1.36
  -6   8   2    7.22    1.38
   6   9  -4   48.37    2.64
  -6   9   2  158.75    4.19
  -6   9   2  111.42    3.86
   6  10  -4    4.26    1.11
  -6  10   2   21.88    1.70
  -6  10   2   13.79    1.64
   6  11  -4   51.80    2.83
  -6  11   2   65.34    2.79
  -6  11   2   41.14    2.54
   6  12  -4    0.35    0.70
  -6  12   2    2.25    0.99
   6  13  -4   -0.56    0.65
  -6  13   2   -0.11    0.82
   6  14  -4   36.43    2.56
  -6  14   2    0.65    0.87
   6  15  -4   35.88    2.58
  -6  15   2   55.23    3.08
   6  16  -4   17.47    1.94
  -6  16   2    4.06    1.29
   6  17  -4   34.64    2.68
  -6  17   2   32.39    2.55
   6  18  -4   10.18    1.81
  -6  18   2    4.28    1.37
   6  19  -4    2.21    1.22
  -6  19   2   14.22    2.10
   6  20  -4   -0.47    0.82
   6  20  -4    0.13    0.62
  -6  20   2    0.10    0.97
  -8  13   5   34.05    2.70
   8  12  -3    0.92    1.11
  -8  12   5    1.70    1.06
   8  11  -3   18.89    2.13
  -8  11   5   39.69    2.73
  -8  11   5   28.98    2.44
   8  10  -3    4.17    1.35
  -8  10   5    0.64    0.83
  -8  10   5    0.68    0.91
   8   9  -3    0.11    0.90
  -8   9   5   16.48    1.85
  -8   9   5   13.83    1.90
   8   8  -3    0.38    0.88
  -8   8   5    2.52    1.06
  -8   8   5    3.80    1.23
   8   7  -3    4.35    1.33
  -8   7   5    9.88    1.60
  -8   7   5    8.23    1.52
   8   6  -3   15.40    1.83
  -8   6   5    3.90    1.14
  -8   6   5    2.23    1.07
   8   5  -3   46.15    2.91
  -8   5   5   35.77    2.48
  -8   5   5   26.23    2.21
   8   4  -3    8.05    1.55
  -8   4   5   11.00    1.65
  -8   4   5    9.13    1.57
   8   3  -3   84.14    3.80
   8   3  -3   78.39    3.65
  -8   3   5   50.27    2.90
  -8   3   5   34.76    2.49
   8   2  -3    6.46    1.51
   8   2  -3    7.19    1.39
  -8   2   5   18.33    1.86
  -8   2   5   14.94    1.75
   8   1  -3    4.91    1.40
   8   1  -3    3.33    1.15
  -8   1   5   20.60    1.97
  -8   1   5   22.17    2.02
   8   0  -3   -0.11    0.80
   8   0  -3    0.22    0.73
  -8   0   5    0.15    0.70
   8   0  -5    0.25    0.70
  -8   0   3    0.57    0.85
   8  -1  -3    5.63    1.40
   8  -1  -3    3.65    1.15
   8   1  -5   24.16    2.22
   8   1  -5   21.93    2.00
  -8   1   3    5.85    1.38
   8  -2  -3    7.99    1.58
   8  -2  -3    6.10    1.31
   8   2  -5   18.46    1.97
   8   2  -5   16.60    1.83
  -8   2   3    7.28    1.48
   8   3  -5   46.31    2.93
   8   3  -5   46.81    2.88
  -8   3   3   81.92    3.60
  -8   3   3   63.37    3.32
   8   4  -5   10.85    1.74
   8   4  -5   10.89    1.64
  -8   4   3    9.53    1.56
  -8   4   3   10.10    1.68
   8   5  -5   31.21    2.49
   8   5  -5   33.45    2.48
  -8   5   3   48.71    2.81
  -8   5   3   35.19    2.56
   8   6  -5    1.90    1.03
   8   6  -5    2.54    1.08
  -8   6   3   14.20    1.66
  -8   6   3    9.92    1.69
   8   7  -5    6.57    1.43
  -8   7   3    4.56    1.22
  -8   7   3    3.90    1.24
   8   8  -5    2.17    1.12
  -8   8   3   -0.04    0.75
  -8   8   3    1.67    1.03
   8   9  -5   17.20    1.99
  -8   9   3    2.37    1.10
   8  10  -5    0.39    0.98
  -8  10   3    3.49    1.27
   8  11  -5   38.44    2.90
  -8  11   3   12.45    1.92
   8  12  -5    1.07    1.09
  -8  12   3    3.11    1.32
   8  13  -5   45.87    3.25
  -8  13   3   21.84    2.35
  -8  14   3    0.41    1.12
  -8  15   3    4.87    1.57
   1  26   1   16.61    2.19
   1  25   1    4.55    1.34
   1  24   1   28.56    2.37
  -1  24   2    1.54    0.87
   1  23   1    8.03    1.46
  -1  23   2   21.16    1.99
   1  22   1   25.18    2.14
   1  22   1   21.84    1.97
  -1  22   2    2.78    0.99
   1  21   1    1.13    0.90
   1  21   1    1.69    0.83
  -1  21   2   29.43    2.15
   1  20   1   -0.46    0.56
   1  20   1    0.53    0.56
  -1  20   2   50.45    2.64
  -1  20   2   48.82    2.62
   1  19   1    5.12    1.16
   1  19   1    5.57    1.07
  -1  19   2   75.57    3.06
  -1  19   2   66.40    2.91
   1  18   1   61.06    2.75
   1  18   1   54.15    2.60
  -1  18   2    8.20    1.25
  -1  18   2    6.74    1.14
   1  17   1    2.30    0.84
   1  17   1    3.47    0.82
  -1  17   2    0.68    0.66
  -1  17   2    1.14    0.61
   1  16   1  115.72    3.49
   1  16   1  101.84    3.29
  -1  16   2   15.67    1.38
  -1  16   2   15.08    1.32
   1  15   1    0.09    0.51
   1  15   1    0.18    0.38
  -1  15   2   42.83    2.05
  -1  15   2   41.45    2.00
   1  14   1   71.79    2.60
   1  14   1   65.09    2.45
  -1  14   2   79.01    2.61
  -1  14   2   72.66    2.50
   1  13   1   22.49    1.48
   1  13   1   20.53    1.37
  -1  13   2  120.70    3.10
  -1  13   2  110.42    2.94
   1  12   1  101.65    2.83
   1  12   1   94.26    2.69
  -1  12   2  150.09    3.30
  -1  12   2  140.75    3.15
   1  11   1    6.60    0.82
   1  11   1    6.36    0.74
  -1  11   2  319.04    4.59
  -1  11   2  304.23    4.39
   1  10   1  151.58    3.17
   1  10   1  139.87    2.96
  -1  10   2   68.06    2.06
  -1  10   2   63.01    1.91
   1   9   1  187.11    3.36
  -1   9   2    5.95    0.69
  -1   9   2    5.68    0.62
   1   8   1  464.27    5.04
  -1   8   2  207.41    3.23
  -1   8   2  204.06    3.01
   1   7   1  160.93    2.82
  -1   7   2  212.08    3.11
  -1   7   2  206.97    2.82
  -1   6   2   73.96    1.76
  -1   6   2   73.18    1.56
   1   5   1   -0.06    0.14
  -1   5   2  256.94    3.06
  -1   5   2  248.66    2.64
   1   4   1   84.93    1.70
  -1   4   2    2.90    0.41
   1   3   1    3.39    0.37
  -1   3   2 1018.18    5.80
   1   2   1 1034.21    6.66
  -1   2   2  391.76    3.24
   1   1   1    7.35    0.41
  -1   1   2  165.98    1.96
   1   0   1 1791.21   11.43
   1   0   1 1668.80   10.05
  -1   0   2    0.53    0.17
  -1  -1   2  153.87    1.82
  -1   1  -1    6.87    0.33
  -1  -2   2  359.38    2.94
  -1   2  -1 1290.52    8.50
  -1   2  -1 1235.06    6.78
   1   3  -2  940.26    5.34
   1   3  -2  923.45    5.27
  -1   3  -1    6.51    0.34
  -1   3  -1    5.89    0.46
   1   4  -2    2.94    0.36
  -1   4  -1  103.83    1.33
  -1   4  -1  102.03    1.86
   1   5  -2  239.86    2.73
  -1   5  -1    0.54    0.19
  -1   5  -1    0.59    0.24
   1   6  -2   71.91    1.60
  -1   6  -1  103.67    1.60
  -1   6  -1   96.05    2.07
   1   7  -2  210.05    2.87
   1   7  -2  197.06    3.17
  -1   7  -1  169.51    2.20
  -1   7  -1  158.16    2.81
   1   8  -2  208.90    3.03
   1   8  -2  196.87    3.36
  -1   8  -1  499.38    4.13
  -1   8  -1  467.54    5.11
   1   9  -2    5.11    0.63
   1   9  -2    3.85    0.59
  -1   9  -1  197.15    2.74
  -1   9  -1  184.35    3.38
   1  10  -2   69.28    1.97
   1  10  -2   60.45    2.09
  -1  10  -1  154.06    2.58
  -1  10  -1  146.95    3.17
   1  11  -2  317.77    4.33
   1  11  -2  290.03    4.73
  -1  11  -1    6.66    0.68
  -1  11  -1    5.29    0.77
   1  12  -2  152.13    3.14
   1  12  -2  136.41    3.40
  -1  12  -1  105.47    2.40
  -1  12  -1  100.80    2.89
   1  13  -2  116.73    2.88
   1  13  -2  106.37    3.13
  -1  13  -1   23.59    1.28
  -1  13  -1   21.47    1.45
   1  14  -2   79.32    2.49
   1  14  -2   68.40    2.63
  -1  14  -1   76.27    2.27
  -1  14  -1   70.52    2.64
   1  15  -2   41.56    1.93
   1  15  -2   34.17    1.96
  -1  15  -1    0.43    0.48
  -1  15  -1    0.09    0.40
   1  16  -2   16.37    1.35
   1  16  -2   14.39    1.38
  -1  16  -1  121.20    3.08
  -1  16  -1  111.92    3.56
   1  17  -2    0.42    0.58
   1  17  -2    0.84    0.59
  -1  17  -1    3.70    0.90
   1  18  -2    7.22    1.16
   1  18  -2    5.88    1.11
  -1  18  -1   60.06    2.82
   1  19  -2   62.47    3.01
  -1  19  -1    5.34    1.11
   1  20  -2   43.21    2.61
  -1  20  -1   -0.74    0.43
   1  21  -2   29.53    2.26
  -1  21  -1    2.42    0.95
   1  22  -2    2.73    0.99
  -1  22  -1   23.89    2.13
   1  23  -2   20.28    2.04
  -1  23  -1    9.19    1.58
   1  24  -2    1.64    0.97
  -1  24  -1   24.18    2.24
   1  25  -2   -0.49    0.69
  -1  25  -1    2.84    1.11
   1  26  -2    0.89    0.93
  -1  26  -1   18.02    2.10
   3  24   0    2.05    1.09
   3  23   0    1.34    1.04
   3  23   0    0.11    0.71
   3  22   0   37.77    2.71
   3  22   0   32.49    2.48
   3  21   0   12.63    1.86
   3  21   0   10.72    1.59
  -3  21   3    2.18    0.96
   3  20   0   32.66    2.39
   3  20   0   29.95    2.25
  -3  20   3    7.63    1.33
   3  19   0   12.91    1.60
   3  19   0   13.10    1.50
  -3  19   3   34.82    2.25
   3  18   0   38.80    2.43
   3  18   0   32.99    2.22
  -3  18   3   49.35    2.52
  -3  18   3   41.15    2.35
   3  17   0    6.91    1.27
   3  17   0    5.28    1.05
  -3  17   3   50.17    2.46
  -3  17   3   45.97    2.40
   3  16   0   10.65    1.44
   3  16   0    9.76    1.20
  -3  16   3   10.95    1.26
  -3  16   3    9.60    1.26
   3  15   0   87.61    3.26
  -3  15   3  168.87    4.14
  -3  15   3  158.85    4.07
   3  14   0   56.65    2.60
  -3  14   3   22.32    1.59
  -3  14   3   20.44    1.52
   3  13   0   89.52    3.11
  -3  13   3   60.56    2.39
  -3  13   3   55.37    2.29
   3  12   0   76.00    2.79
  -3  12   3    7.56    1.04
  -3  12   3    7.22    0.97
   3  11   0   56.09    2.34
  -3  11   3   53.88    2.13
  -3  11   3   45.04    1.94
   3  10   0  136.60    3.49
  -3  10   3  113.51    2.96
  -3  10   3   95.51    2.66
   3   9   0    0.48    0.44
  -3   9   3  280.34    4.48
  -3   9   3  241.12    4.04
   3   8   0    0.65    0.41
  -3   8   3   95.74    2.59
   3   7   0   64.93    2.23
  -3   7   3  286.41    4.33
  -3   7   3  220.35    3.61
   3   6   0  337.95    4.81
  -3   6   3   10.27    0.92
  -3   6   3    7.59    0.84
   3   5   0    0.72    0.40
  -3   5   3    6.75    0.78
  -3   5   3    4.97    0.71
   3   4   0  170.96    3.21
  -3   4   3   34.84    1.46
  -3   4   3   22.79    1.20
   3   3   0  146.58    2.89
   3   3   0  147.29    2.90
  -3   3   3  167.16    3.05
  -3   3   3  117.65    2.42
  -3  -3   0  143.02    2.91
   3   2   0  253.78    3.69
   3   2   0  244.80    3.63
  -3   2   3   26.38    1.24
  -3   2   3   18.50    1.05
  -3  -2   0  219.11    3.53
   3   1   0  107.26    2.35
   3   1   0  105.52    2.33
  -3   1   3  467.42    5.04
  -3   1   3  386.10    4.31
  -3  -1   0   93.12    2.31
  -3   0   3    6.92    0.72
  -3   0   3    4.47    0.61
  -3   0   0    0.25    0.30
  -3   0   0   -0.15    0.34
  -3  -1   3  473.91    5.10
  -3  -1   3  449.94    4.78
  -3   1   0  113.99    2.34
  -3   1   0   82.10    2.18
  -3  -2   3   25.69    1.24
  -3   2   0  260.63    3.48
  -3   2   0  180.60    3.21
  -3  -3   3  163.71    3.07
  -3   3   0  151.49    2.65
  -3   3   0  104.56    2.49
   3   4  -3   32.68    1.44
   3   4  -3   32.72    1.41
  -3   4   0  181.10    2.90
   3   5  -3    6.53    0.77
   3   5  -3    8.45    0.79
  -3   5   0    0.50    0.32
  -3   5   0   -0.18    0.38
   3   6  -3    8.92    0.87
   3   6  -3    8.39    0.79
  -3   6   0  353.69    4.13
  -3   6   0  271.88    4.25
   3   7  -3  277.55    4.38
  -3   7   0   66.57    1.87
  -3   7   0   55.33    2.04
   3   8  -3   93.44    2.63
  -3   8   0    1.28    0.43
  -3   8   0    1.41    0.55
   3   9  -3  261.49    4.49
  -3   9   0    1.13    0.42
  -3   9   0    0.95    0.51
   3  10  -3  103.85    2.94
  -3  10   0  146.92    2.95
  -3  10   0  124.51    3.27
   3  11  -3   48.19    2.10
  -3  11   0   64.49    2.05
  -3  11   0   55.56    2.30
   3  12  -3    6.71    1.01
  -3  12   0   83.36    2.39
  -3  12   0   72.02    2.69
   3  13  -3   60.32    2.48
  -3  13   0   95.70    2.63
  -3  13   0   86.06    3.01
   3  14  -3   21.57    1.62
   3  14  -3   18.91    1.56
  -3  14   0   53.23    2.48
   3  15  -3  162.76    4.22
   3  15  -3  139.97    4.18
  -3  15   0   82.97    3.16
   3  16  -3   10.51    1.37
   3  16  -3    9.26    1.30
  -3  16   0    9.75    1.32
   3  17  -3   48.02    2.48
   3  17  -3   40.20    2.43
  -3  17   0    4.06    0.96
   3  18  -3   45.30    2.50
   3  18  -3   39.32    2.48
  -3  18   0   34.32    2.27
   3  19  -3   35.19    2.29
   3  19  -3   27.88    2.18
  -3  19   0   13.46    1.55
   3  20  -3    6.69    1.30
  -3  20   0   29.10    2.24
   3  21  -3    1.54    0.87
  -3  21   0   11.92    1.70
   3  22  -3    1.55    0.92
  -3  22   0   30.74    2.43
   3  23  -3    7.67    1.60
  -3  23   0    0.78    0.84
   3  24  -3    2.80    1.12
  -3  24   0    1.32    1.02
   5  22  -1    1.27    1.11
   5  22  -1    0.91    0.82
   5  21  -1    0.36    0.90
   5  21  -1    0.03    0.63
   5  20  -1    0.70    0.99
   5  20  -1    0.00    0.58
   5  19  -1   12.87    1.92
   5  18  -1    0.88    0.89
   5  17  -1   19.12    1.95
  -5  17   4    0.41    0.73
   5  16  -1    4.32    1.23
  -5  16   4    4.97    1.18
   5  15  -1   90.08    3.76
  -5  15   4    1.93    0.91
  -5  15   4    1.58    0.86
   5  14  -1    2.59    1.00
  -5  14   4   38.81    2.29
  -5  14   4   31.12    2.10
   5  13  -1    1.99    0.88
  -5  13   4   29.40    1.96
  -5  13   4   19.18    1.71
   5  12  -1   -0.05    0.62
  -5  12   4  106.96    3.51
  -5  12   4   63.23    2.76
   5  11  -1   11.50    1.40
  -5  11   4   16.32    1.46
  -5  11   4   11.49    1.45
   5  10  -1    0.28    0.61
  -5  10   4   39.83    2.13
  -5  10   4   27.82    1.91
   5   9  -1  130.57    3.93
  -5   9   4    8.32    1.18
  -5   9   4    7.27    1.19
   5   8  -1    1.15    0.71
  -5   8   4    0.47    0.54
  -5   8   4    0.96    0.75
   5   7  -1  464.30    7.07
  -5   7   4   24.01    1.63
  -5   7   4   16.79    1.53
   5   6  -1   18.54    1.50
  -5   6   4  189.40    4.27
  -5   6   4  133.87    3.54
   5   5  -1   42.94    2.14
  -5   5   4   10.55    1.14
  -5   5   4   10.09    1.26
   5   4  -1    1.40    0.66
   5   4  -1    1.50    0.62
  -5   4   4  373.25    5.88
  -5   4   4  271.88    4.88
   5   3  -1   28.15    1.72
   5   3  -1   25.68    1.62
  -5   3   4   57.31    2.35
  -5   3   4   47.63    2.15
  -5  -3   1   25.47    1.69
   5   2  -1   20.00    1.46
   5   2  -1   17.65    1.33
  -5   2   4  162.60    3.88
  -5   2   4  128.69    3.36
  -5  -2   1   14.76    1.35
   5   1  -1  174.41    3.93
   5   1  -1  166.90    3.86
  -5   1   4    1.35    0.62
  -5   1   4    1.30    0.66
  -5  -1   1  147.41    3.76
  -5   0   4    0.21    0.44
  -5   0   4    0.16    0.55
  -5   0   1    7.82    1.06
  -5   0   1    5.56    1.00
  -5  -1   4    1.50    0.61
  -5  -1   4    1.02    0.64
  -5   1   1  175.98    3.88
  -5   1   1  135.37    3.61
  -5  -2   4  164.53    3.95
  -5   2   1   18.68    1.36
  -5   2   1   14.01    1.37
  -5  -3   4   59.62    2.43
  -5   3   1   26.81    1.57
  -5   3   1   21.17    1.64
   5   4  -4  360.51    5.97
   5   4  -4  352.01    5.88
  -5   4   1    1.62    0.63
  -5   4   1    1.25    0.79
   5   5  -4   14.06    1.34
   5   5  -4   11.02    1.15
  -5   5   1   42.96    1.96
  -5   5   1   30.89    1.95
   5   6  -4  189.32    4.46
   5   6  -4  183.46    4.37
  -5   6   1   18.42    1.39
  -5   6   1   12.14    1.47
   5   7  -4   21.33    1.63
   5   7  -4   19.91    1.52
  -5   7   1  482.03    6.37
  -5   7   1  324.36    5.83
   5   8  -4    0.40    0.55
  -5   8   1    2.31    0.72
  -5   8   1    1.20    0.84
   5   9  -4    8.97    1.28
  -5   9   1  137.88    3.50
  -5   9   1   96.81    3.36
   5  10  -4   39.42    2.25
  -5  10   1    0.05    0.49
  -5  10   1    0.14    0.70
   5  11  -4   14.92    1.51
  -5  11   1   11.31    1.20
  -5  11   1    8.44    1.32
   5  12  -4   98.31    3.60
  -5  12   1    0.59    0.72
   5  13  -4   27.57    2.04
  -5  13   1    0.98    0.76
   5  14  -4   36.89    2.38
  -5  14   1    0.22    0.67
   5  15  -4    0.61    0.72
  -5  15   1   68.23    3.22
   5  16  -4    8.22    1.48
  -5  16   1    4.00    1.13
   5  17  -4    0.70    0.86
  -5  17   1   14.73    1.72
   5  18  -4    4.71    1.31
   5  18  -4    2.19    0.90
  -5  18   1    0.17    0.73
   5  19  -4    2.55    1.12
   5  19  -4    2.25    0.98
  -5  19   1   10.81    1.72
   5  20  -4   19.69    2.10
   5  20  -4   16.16    1.90
  -5  20   1    0.99    0.93
   5  21  -4    3.79    1.35
   5  21  -4    3.51    1.23
  -5  21   1    0.01    0.82
   5  22  -4   15.95    2.17
  -5  22   1    1.03    0.99
   7  16  -2    2.30    1.29
   7  15  -2    2.09    1.14
   7  14  -2   19.13    2.10
  -7  14   5   20.03    2.10
   7  13  -2   17.16    1.98
  -7  13   5    0.41    0.82
  -7  13   5   -0.32    0.76
   7  12  -2   14.89    1.84
  -7  12   5    2.69    1.05
  -7  12   5    2.91    1.10
   7  11  -2   28.29    2.35
  -7  11   5   13.44    1.75
  -7  11   5   10.94    1.65
   7  10  -2    7.27    1.46
  -7  10   5   33.58    2.34
  -7  10   5   24.22    2.07
   7   9  -2    0.79    0.88
  -7   9   5   28.52    2.15
  -7   9   5   22.51    1.99
   7   8  -2    0.49    0.81
  -7   8   5  108.56    3.97
  -7   8   5   79.84    3.40
   7   7  -2   56.00    3.01
  -7   7   5    5.42    1.20
  -7   7   5    3.38    1.08
   7   6  -2   45.72    2.69
  -7   6   5   12.88    1.49
  -7   6   5    8.46    1.39
   7   5  -2   54.84    2.90
  -7   5   5    4.65    1.13
  -7   5   5    2.35    0.95
   7   4  -2   27.58    2.10
   7   4  -2   29.16    2.10
  -7   4   5    0.68    0.73
  -7   4   5    0.10    0.66
   7   3  -2   17.51    1.74
   7   3  -2   18.24    1.72
  -7   3   5   38.12    2.36
  -7   3   5   32.13    2.20
   7   2  -2   39.49    2.45
   7   2  -2   41.22    2.44
  -7   2   5   36.01    2.31
  -7   2   5   29.82    2.12
  -7  -2   2   30.91    2.26
   7   1  -2    6.62    1.36
   7   1  -2    5.62    1.16
  -7   1   5   31.44    2.17
  -7   1   5   30.00    2.12
  -7  -1   2    5.23    1.25
   7   0  -2   -0.77    0.70
   7   0  -2    0.37    0.64
  -7   0   5   22.81    1.88
  -7   0   5   20.30    1.79
  -7   0   2    0.35    0.77
   7  -1  -2    5.93    1.30
   7  -1  -2    6.28    1.19
  -7  -1   5   33.59    2.24
  -7   1   2    4.69    1.19
  -7  -2   5   33.11    2.23
   7   2  -5   33.59    2.25
  -7   2   2   39.53    2.33
  -7   2   2   32.25    2.28
   7   3  -5   35.84    2.39
   7   3  -5   33.64    2.25
  -7   3   2   21.22    1.76
  -7   3   2   14.43    1.66
   7   4  -5   -0.72    0.71
   7   4  -5    0.18    0.66
  -7   4   2   28.44    2.01
  -7   4   2   22.77    2.00
   7   5  -5    4.97    1.25
   7   5  -5    4.29    1.10
  -7   5   2   58.50    2.80
  -7   5   2   42.50    2.61
   7   6  -5   11.14    1.68
   7   6  -5   11.53    1.55
  -7   6   2   47.71    2.55
  -7   6   2   37.00    2.48
   7   7  -5    4.95    1.23
   7   7  -5    4.05    1.06
  -7   7   2   63.82    2.91
  -7   7   2   44.20    2.70
   7   8  -5  100.29    4.02
  -7   8   2    0.40    0.65
  -7   8   2    0.60    0.86
   7   9  -5   27.21    2.23
  -7   9   2    0.59    0.73
  -7   9   2   -0.07    0.78
   7  10  -5   30.60    2.38
  -7  10   2    5.29    1.36
   7  11  -5   13.71    1.71
  -7  11   2   20.54    2.10
   7  12  -5    1.84    1.06
  -7  12   2   12.96    1.90
   7  13  -5    0.61    0.90
  -7  13   2   10.85    1.81
   7  14  -5   23.16    2.30
  -7  14   2   13.51    2.00
   7  15  -5    6.79    1.64
  -7  15   2   -0.37    0.86
   7  16  -5   35.79    2.82
  -7  16   2    2.83    1.33
   7  17  -5    7.70    1.73
  -7  17   2   -1.12    0.87
  -7  18   2    6.88    1.76
  -9  10   6    0.42    0.94
  -9   9   6   14.12    2.08
  -9   9   6   13.83    2.02
  -9   8   6    2.15    1.12
  -9   8   6    1.51    1.12
   9   7  -3    0.46    1.03
  -9   7   6    3.82    1.31
  -9   7   6    3.86    1.33
  -9   6   6    4.62    1.40
  -9   6   6    5.21    1.46
   9   5  -3    0.64    1.01
  -9   5   6   37.95    2.80
  -9   5   6   31.63    2.56
   9   4  -3   -0.42    0.87
  -9   4   6    6.50    1.56
  -9   4   6    5.28    1.43
   9   3  -3    1.21    1.03
  -9   3   6   35.50    2.72
  -9   3   6   29.19    2.46
   9   2  -3   17.04    1.94
  -9   2   6    1.32    1.09
   9   1  -3    0.47    0.94
   9   1  -3    0.04    0.77
   9  -1  -6    5.17    1.53
   9  -1  -6    2.98    1.17
   9   0  -3   17.93    1.99
   9   0  -6    0.76    1.02
   9   0  -6    0.22    0.78
   9  -1  -3    0.59    0.92
   9  -1  -3    1.61    0.96
   9   1  -6    4.45    1.42
   9   1  -6    3.62    1.21
  -9   1   3    0.56    0.92
   9  -2  -3   14.92    1.82
   9   2  -6    1.86    1.14
   9   2  -6    1.63    0.99
  -9   2   3   15.63    1.95
   9  -3  -3    1.02    0.97
   9  -3  -3    1.23    0.96
   9   3  -6   36.48    2.81
  -9   3   3   -0.29    0.79
   9  -4  -3   -0.19    0.97
   9  -4  -3    0.77    0.88
   9   4  -6    4.41    1.50
   9   4  -6    5.23    1.42
  -9   4   3    1.65    1.07
   9  -5  -3    1.22    1.10
   9  -5  -3    0.06    0.75
   9   5  -6   34.79    2.78
  -9   5   3    0.15    0.89
   9  -6  -3   27.72    2.37
   9   6  -6    3.67    1.33
  -9   6   3   32.81    2.58
  -9   6   3   25.59    2.45
  -9   7   3   -0.17    0.88
  -9   8   3   32.63    2.76
  -9   9   3    0.06    0.91
  -9  10   3   16.20    2.28
   0  24   2   36.99    2.63
   0  23   2    0.48    0.72
   0  22   2   11.79    1.62
   0  21   2    4.27    1.18
   0  21   2    3.35    1.00
   0  20   2    3.31    1.04
   0  20   2    3.80    1.00
   0  19   2   11.70    1.51
   0  19   2    9.90    1.34
   0  18   2  129.21    3.90
   0  18   2  124.75    3.80
   0  17   2    5.08    1.02
   0  17   2    3.53    0.83
   0  16   2  106.66    3.32
   0  16   2   93.05    3.04
   0  15   2    1.02    0.60
   0  15   2    0.12    0.42
   0  14   2  117.19    3.24
   0  14   2  101.33    2.92
   0  13   2   31.97    1.70
   0  13   2   28.06    1.52
   0  12   2    7.84    0.92
   0  12   2    6.13    0.73
   0  11   2   23.47    1.36
   0  11   2   22.76    1.23
   0  10   2  222.86    3.77
   0  10   2  210.27    3.41
   0   9   2  162.70    3.07
   0   9   2  147.45    2.68
   0   8   2  304.80    3.99
   0   8   2  283.67    3.48
   0   7   2  164.55    2.78
   0   7   2  152.18    2.36
   0   6   2  134.37    2.36
   0   6   2  152.22    2.16
   0   5   2  113.80    2.02
   0   5   2  217.14    2.34
   0   4   2   35.40    1.05
   0   3   2  105.17    1.66
   0  -3  -2   69.06    1.37
   0   2   2  798.46    4.72
   0   1   2   83.87    1.19
   0   0   2 1103.12    7.89
   0   3  -2  107.67    1.24
   0   3  -2  103.73    1.61
   0   4  -2  122.24    1.36
   0   4  -2  118.03    1.91
   0   5  -2  241.89    2.21
   0   5  -2  223.90    2.88
   0   6  -2  163.56    1.94
   0   6  -2  152.58    2.56
   0   7  -2  166.09    2.14
   0   7  -2  154.67    2.75
   0   8  -2  313.98    3.23
   0   8  -2  293.47    4.03
   0   9  -2  164.70    2.50
   0  10  -2  234.13    3.18
   0  10  -2  197.90    3.69
   0  11  -2   23.14    1.13
   0  11  -2   19.18    1.25
   0  12  -2    7.40    0.77
   0  12  -2    6.32    0.87
   0  13  -2   32.25    1.46
   0  13  -2   27.35    1.62
   0  14  -2  116.85    2.79
   0  14  -2  103.86    3.19
   0  15  -2    0.42    0.48
   0  15  -2    0.30    0.45
   0  16  -2  109.08    2.95
   0  16  -2   94.12    3.29
   0  17  -2    3.42    0.89
   0  18  -2  123.22    4.03
   0  19  -2    8.72    1.33
   0  20  -2    2.70    0.93
   0  21  -2    1.74    0.90
   0  22  -2   14.96    1.75
   0  23  -2    0.88    0.80
   0  24  -2   34.22    2.63
   0  25  -2    0.08    0.70
   0  26  -2   32.28    2.76
   2  25   1    0.24    0.80
   2  24   1    0.93    0.89
   2  23   1    5.80    1.47
   2  23   1    8.34    1.49
   2  22   1    8.06    1.54
   2  22   1    4.76    1.19
   2  21   1   35.76    2.49
   2  21   1   33.43    2.34
  -2  21   3   28.80    2.13
   2  20   1    9.24    1.51
   2  20   1    6.63    1.22
  -2  20   3   69.42    3.09
   2  19   1    9.19    1.46
   2  19   1    7.12    1.21
  -2  19   3   87.00    3.36
  -2  19   3   79.99    3.20
   2  18   1   45.27    2.52
   2  18   1   39.55    2.30
  -2  18   3   -0.20    0.64
  -2  18   3    0.47    0.56
   2  17   1    0.39    0.65
   2  17   1   -0.03    0.43
  -2  17   3   11.23    1.41
  -2  17   3   10.50    1.24
   2  16   1    5.14    1.07
   2  16   1    4.57    0.94
  -2  16   3    1.39    0.75
  -2  16   3    2.25    0.74
   2  15   1    2.56    0.82
   2  15   1    4.05    0.83
  -2  15   3   82.80    2.89
  -2  15   3   79.05    2.75
   2  14   1  135.39    3.73
   2  14   1  120.56    3.44
  -2  14   3  133.49    3.52
  -2  14   3  128.34    3.34
   2  13   1  209.48    4.46
  -2  13   3  309.49    5.14
  -2  13   3  298.50    4.86
   2  12   1  140.83    3.56
  -2  12   3  124.60    3.18
  -2  12   3  115.68    2.91
   2  11   1  174.53    3.80
  -2  11   3  206.19    3.93
  -2  11   3  201.34    3.66
   2  10   1  100.94    2.81
  -2  10   3   39.15    1.70
  -2  10   3   37.60    1.54
   2   9   1   12.69    1.06
  -2   9   3    1.16    0.52
  -2   9   3    0.66    0.37
   2   8   1    0.27    0.35
  -2   8   3    7.19    0.80
  -2   8   3    7.27    0.70
   2   7   1   27.92    1.36
  -2   7   3    0.88    0.38
  -2   7   3    0.72    0.31
  -2   6   3  110.94    2.41
  -2   6   3   92.86    1.95
   2   5   1  928.91    6.97
  -2   5   3    2.30    0.46
  -2   5   3    1.11    0.33
   2   4   1   11.20    0.79
  -2   4   3  580.11    5.17
  -2   4   3  429.62    3.81
   2   3   1  312.66    3.65
  -2   3   3  318.87    3.71
  -2   3   3  214.47    2.60
  -2  -3  -1  292.66    3.51
   2   2   1  141.23    2.33
  -2   2   3    2.12    0.38
  -2   2   3    2.07    0.37
   2   1   1   33.28    1.09
   2   1   1   28.69    1.01
  -2   1   3   85.37    1.84
  -2   1   3   71.76    1.49
  -2  -1  -1   24.99    1.06
   2   0   1    0.34    0.21
   2   0   1    0.27    0.19
  -2   0   3    0.11    0.20
  -2   0   3    0.27    0.26
  -2   0  -1    0.01    0.27
  -2  -1   3   85.34    1.82
  -2   1  -1   34.60    1.04
  -2   1  -1   11.53    0.79
  -2  -2   3    2.79    0.44
  -2   2  -1  152.86    2.09
  -2   2  -1  106.24    2.12
  -2  -3   3  303.50    3.52
  -2   3  -1  332.60    3.10
  -2  -4   3  568.08    4.95
   2   4  -3  535.20    4.83
  -2   4  -1   10.76    0.62
  -2   4  -1   10.31    0.79
   2   5  -3    2.07    0.43
   2   5  -3    2.39    0.40
  -2   5  -1 1005.59    5.80
  -2   5  -1  907.38    6.87
   2   6  -3  102.61    2.24
  -2   6  -1   64.19    1.44
  -2   6  -1   59.81    1.84
   2   7  -3    0.79    0.35
  -2   7  -1   30.38    1.07
  -2   7  -1   26.83    1.32
   2   8  -3    6.96    0.73
  -2   8  -1    0.53    0.30
  -2   8  -1    0.17    0.30
   2   9  -3    1.23    0.50
  -2   9  -1   14.37    0.87
  -2   9  -1   12.20    1.03
   2  10  -3   37.06    1.61
  -2  10  -1  105.29    2.19
  -2  10  -1   97.61    2.75
   2  11  -3  207.24    3.82
   2  11  -3  188.21    4.02
  -2  11  -1  187.80    3.06
  -2  11  -1  171.90    3.78
   2  12  -3  122.13    3.06
   2  12  -3  110.26    3.22
  -2  12  -1  154.50    2.93
  -2  12  -1  137.11    3.52
   2  13  -3  307.21    4.98
   2  13  -3  275.28    5.25
  -2  13  -1  227.25    3.68
  -2  13  -1  205.56    4.45
   2  14  -3  129.55    3.37
   2  14  -3  119.16    3.59
  -2  14  -1  144.94    3.08
  -2  14  -1  128.47    3.66
   2  15  -3   82.76    2.80
   2  15  -3   73.26    2.94
  -2  15  -1    3.71    0.90
   2  16  -3    0.95    0.66
   2  16  -3    0.42    0.49
  -2  16  -1    4.66    0.97
   2  17  -3   11.27    1.26
   2  17  -3   10.27    1.27
  -2  17  -1    0.02    0.41
   2  18  -3    0.18    0.61
   2  18  -3    0.25    0.50
  -2  18  -1   38.70    2.36
   2  19  -3   75.33    3.39
  -2  19  -1    7.13    1.27
   2  20  -3   66.46    3.30
  -2  20  -1    6.54    1.29
   2  21  -3   25.13    2.16
  -2  21  -1   30.50    2.33
   2  22  -3   27.43    2.31
  -2  22  -1    5.96    1.32
   2  23  -3    0.90    0.82
  -2  23  -1    6.51    1.45
   2  24  -3    0.11    0.69
  -2  24  -1    1.30    0.92
   2  25  -3    0.88    0.82
  -2  25  -1    0.17    0.74
   4  23   0   14.87    2.18
   4  23   0   11.99    1.83
   4  22   0    0.27    0.94
   4  22   0    0.47    0.78
   4  21   0    0.04    0.82
   4  21   0   -0.11    0.62
   4  20   0    2.02    1.02
   4  20   0    2.22    0.94
   4  19   0   18.52    1.92
   4  19   0   14.01    1.62
   4  18   0    5.49    1.31
   4  18   0    3.43    0.98
  -4  18   4    2.93    0.98
   4  17   0  165.83    5.01
  -4  17   4   83.33    3.32
  -4  17   4   67.82    2.98
   4  16   0    0.36    0.68
  -4  16   4    0.96    0.77
  -4  16   4    0.58    0.62
   4  15   0  140.98    4.41
  -4  15   4   75.11    3.02
  -4  15   4   63.80    2.74
   4  14   0    5.39    1.18
  -4  14   4   10.16    1.37
  -4  14   4    8.34    1.19
   4  13   0    2.07    0.82
  -4  13   4    4.41    0.98
  -4  13   4    2.46    0.83
   4  12   0   29.09    1.94
  -4  12   4   -0.15    0.55
  -4  12   4   -0.05    0.55
   4  11   0   12.49    1.32
  -4  11   4   77.59    2.79
  -4  11   4   55.80    2.32
   4  10   0   12.83    1.29
  -4  10   4    8.59    1.14
  -4  10   4    5.63    0.96
   4   9   0  137.88    3.73
  -4   9   4  148.23    3.65
  -4   9   4  108.97    3.00
   4   8   0   52.36    2.29
  -4   8   4   52.87    2.18
  -4   8   4   37.73    1.84
   4   7   0  106.82    3.13
  -4   7   4  281.36    4.81
  -4   7   4  186.31    3.73
   4   6   0   13.83    1.21
  -4   6   4    5.68    0.88
  -4   6   4    4.10    0.83
   4   5   0   47.28    2.01
  -4   5   4   33.62    1.67
  -4   5   4   24.32    1.42
   4   4   0   33.70    1.68
  -4   4   4    2.39    0.63
  -4   4   4    1.28    0.56
   4   3   0   11.22    1.01
   4   3   0   10.26    0.97
  -4   3   4   75.11    2.39
  -4   3   4   53.37    1.93
  -4  -3   0    9.46    1.02
   4   2   0    6.30    0.88
   4   2   0    6.72    0.87
  -4   2   4   47.09    1.92
  -4   2   4   37.11    1.63
  -4  -2   0    4.24    0.77
   4   1   0  320.97    4.70
   4   1   0  310.92    4.64
  -4   1   4  412.14    5.52
  -4   1   4  345.25    4.76
  -4  -1   0  263.42    4.45
   4   0   0   65.87    2.14
   4   0   0   65.87    2.14
  -4   0   4   -0.29    0.36
  -4   0   4    0.30    0.47
  -4   0   0   53.99    2.10
  -4  -1   4  408.85    5.51
  -4   1   0  338.78    4.70
  -4   1   0  247.66    4.32
  -4  -2   4   46.36    1.92
  -4   2   0    6.55    0.81
  -4   2   0    5.63    0.93
  -4  -3   4   67.24    2.30
  -4   3   0   13.06    0.99
  -4   3   0    8.00    1.03
  -4  -4   4    2.36    0.63
  -4   4   0   35.91    1.55
  -4   4   0   23.74    1.53
   4   5  -4   31.22    1.66
   4   5  -4   30.78    1.61
  -4   5   0   45.25    1.73
  -4   5   0   32.99    1.77
   4   6  -4    6.81    0.99
   4   6  -4    5.78    0.85
  -4   6   0   15.52    1.09
  -4   6   0   10.92    1.18
   4   7  -4  257.20    4.75
   4   7  -4  246.98    4.63
  -4   7   0  107.73    2.65
  -4   7   0   81.19    2.74
   4   8  -4   51.03    2.20
  -4   8   0   51.11    1.87
  -4   8   0   37.11    1.96
   4   9  -4  142.27    3.68
  -4   9   0  141.88    3.10
  -4   9   0  104.62    3.22
   4  10  -4    8.37    1.13
  -4  10   0   13.08    1.07
  -4  10   0    9.69    1.20
   4  11  -4   73.54    2.81
  -4  11   0   15.83    1.18
  -4  11   0   12.20    1.32
   4  12  -4    0.41    0.54
  -4  12   0   29.62    1.59
  -4  12   0   25.34    1.82
   4  13  -4    4.63    1.02
  -4  13   0    1.41    0.74
   4  14  -4    7.85    1.25
  -4  14   0    5.15    1.08
   4  15  -4   76.12    3.13
  -4  15   0  129.05    4.14
   4  16  -4    1.18    0.80
   4  16  -4    0.41    0.54
  -4  16   0    0.09    0.61
   4  17  -4   78.50    3.35
   4  17  -4   66.08    3.23
  -4  17   0  149.10    4.69
   4  18  -4    5.44    1.29
   4  18  -4    5.11    1.22
  -4  18   0    4.12    1.15
   4  19  -4   34.56    2.43
   4  19  -4   30.59    2.37
  -4  19   0   16.81    1.83
   4  20  -4    0.23    0.81
   4  20  -4    0.76    0.71
  -4  20   0    2.92    1.09
   4  21  -4    3.01    1.07
  -4  21   0   -0.20    0.63
   4  22  -4   -0.27    0.59
  -4  22   0   -0.57    0.67
   4  23  -4   27.45    2.51
  -4  23   0   12.92    1.99
   6  19  -1    9.10    1.81
   6  18  -1   11.39    1.94
   6  17  -1    6.36    1.54
   6  16  -1    0.29    0.79
   6  15  -1    2.68    1.15
  -6  15   5    7.54    1.42
   6  14  -1   97.13    4.10
  -6  14   5   46.17    2.66
  -6  14   5   32.17    2.31
   6  13  -1    9.81    1.64
  -6  13   5   31.51    2.21
  -6  13   5   20.78    1.90
   6  12  -1   66.93    3.29
  -6  12   5   92.83    3.58
  -6  12   5   61.27    2.94
   6  11  -1    5.76    1.29
  -6  11   5    5.70    1.19
  -6  11   5    5.12    1.19
   6  10  -1   13.30    1.59
  -6  10   5   60.91    2.85
  -6  10   5   47.40    2.54
   6   9  -1    0.88    0.81
  -6   9   5   14.96    1.50
  -6   9   5    9.86    1.41
   6   8  -1    0.79    0.77
  -6   8   5   10.60    1.41
  -6   8   5    6.09    1.20
   6   7  -1   27.78    2.01
  -6   7   5   13.55    1.59
  -6   7   5   10.03    1.39
   6   6  -1  135.30    4.15
  -6   6   5   53.91    2.59
  -6   6   5   39.31    2.22
   6   5  -1   40.76    2.31
  -6   5   5   44.34    2.34
  -6   5   5   34.67    2.11
   6   4  -1   99.72    3.46
  -6   4   5  104.25    3.51
  -6   4   5   79.75    3.00
   6   3  -1   21.82    1.71
   6   3  -1   24.37    1.75
  -6   3   5   57.97    2.63
  -6   3   5   47.46    2.36
  -6  -3   1   16.92    1.64
   6   2  -1   22.37    1.71
   6   2  -1   21.35    1.63
  -6   2   5   11.83    1.31
  -6   2   5    9.18    1.30
  -6  -2   1   18.69    1.69
   6   1  -1   48.15    2.37
   6   1  -1   49.13    2.36
  -6   1   5    0.45    0.57
  -6   1   5    0.98    0.71
  -6  -1   1   42.70    2.37
   6   0  -1    0.03    0.60
   6   0  -1   -0.20    0.42
  -6   0   5    0.61    0.60
  -6   0   5    0.67    0.73
  -6   0   1    0.13    0.70
   6  -1  -1   49.52    2.35
   6  -1  -1   46.42    2.25
  -6  -1   5    0.47    0.67
  -6   1   1   38.55    2.27
  -6  -2   5   11.83    1.34
  -6   2   1   22.44    1.62
  -6   2   1   16.82    1.66
  -6  -3   5   57.04    2.66
  -6   3   1   22.89    1.65
  -6   3   1   17.25    1.68
   6   4  -5   95.26    3.46
   6   4  -5   99.88    3.51
  -6   4   1   95.48    3.17
  -6   4   1   72.68    3.06
   6   5  -5   44.86    2.43
   6   5  -5   44.01    2.40
  -6   5   1   42.17    2.15
  -6   5   1   30.21    2.11
   6   6  -5   48.46    2.56
   6   6  -5   50.45    2.57
  -6   6   1  137.40    3.78
  -6   6   1   97.02    3.56
   6   7  -5   17.26    1.65
   6   7  -5   14.73    1.51
  -6   7   1   30.43    1.87
  -6   7   1   20.88    1.92
   6   8  -5    9.06    1.39
  -6   8   1    0.13    0.55
  -6   8   1    0.33    0.77
   6   9  -5   12.54    1.46
  -6   9   1    1.56    0.70
  -6   9   1    1.68    0.98
   6  10  -5   61.89    3.02
  -6  10   1   11.98    1.66
   6  11  -5    5.63    1.22
  -6  11   1    5.48    1.31
   6  12  -5   85.71    3.64
  -6  12   1   53.35    2.95
   6  13  -5   24.87    2.10
  -6  13   1    8.34    1.52
   6  14  -5   48.42    2.90
  -6  14   1   65.36    3.31
   6  15  -5    5.50    1.37
  -6  15   1    0.39    0.80
   6  16  -5    2.20    1.06
  -6  16   1   -0.87    0.68
   6  17  -5    0.39    0.94
  -6  17   1    4.66    1.35
   6  18  -5    4.85    1.41
  -6  18   1    7.33    1.66
   6  19  -5   11.55    1.94
   6  19  -5    5.84    1.38
  -6  19   1    6.53    1.62
   6  20  -5   13.78    2.16
   6  20  -5    8.69    1.67
  -6  20   1    6.88    1.70
   8  12  -2    0.80    0.98
  -8  12   6    6.28    1.50
   8  11  -2    0.20    0.96
  -8  11   6   -0.11    0.82
   8  10  -2   25.73    2.41
  -8  10   6   27.14    2.32
  -8  10   6   19.65    2.05
   8   9  -2    4.25    1.33
  -8   9   6    0.93    0.86
  -8   9   6    0.97    0.93
   8   8  -2   51.06    3.16
  -8   8   6   86.79    3.90
  -8   8   6   73.97    3.54
   8   7  -2    8.61    1.63
  -8   7   6    1.36    0.98
  -8   7   6    1.23    0.95
   8   6  -2   24.53    2.22
  -8   6   6   29.83    2.34
  -8   6   6   28.72    2.28
   8   5  -2    0.73    0.92
  -8   5   6    4.11    1.17
  -8   5   6    2.63    1.05
   8   4  -2    0.63    0.92
  -8   4   6    0.38    0.73
  -8   4   6    0.12    0.74
   8   3  -2    2.12    1.03
  -8   3   6    1.16    0.88
  -8   3   6    0.85    0.82
   8   2  -2   21.77    2.06
   8   2  -2   21.55    2.01
  -8   2   6   18.57    1.87
  -8   2   6   15.37    1.72
   8   1  -2   42.07    2.73
   8   1  -2   41.18    2.65
  -8   1   6    4.32    1.23
  -8  -1   2   37.19    2.64
   8   0  -2   93.22    3.90
   8   0  -2   90.59    3.80
  -8   0   6   32.88    2.43
  -8   0   2   75.06    3.64
   8  -1  -2   42.03    2.71
   8  -1  -2   44.64    2.72
  -8  -1   6    4.05    1.19
  -8   1   2   33.67    2.55
   8  -2  -2   21.04    2.00
   8  -2  -2   19.16    1.88
   8   2  -6   17.58    1.92
   8   2  -6   16.23    1.79
  -8   2   2   16.60    1.89
   8  -3  -2    2.89    1.10
   8  -3  -2    2.79    0.96
   8   3  -6    0.94    0.93
   8   3  -6    0.49    0.70
  -8   3   2    1.11    0.96
   8  -4  -2    1.37    1.02
   8  -4  -2    1.59    0.92
   8   4  -6   -0.33    0.70
   8   4  -6    0.08    0.70
  -8   4   2    1.53    0.99
   8   5  -6    2.40    1.13
   8   5  -6    2.17    1.01
  -8   5   2    0.65    0.79
  -8   5   2    0.61    0.90
   8   6  -6   32.56    2.55
   8   6  -6   27.03    2.32
  -8   6   2   27.39    2.16
  -8   6   2   19.33    2.05
   8   7  -6    2.06    1.08
   8   7  -6    2.16    1.05
  -8   7   2    7.21    1.54
  -8   8   2   36.45    2.68
   8   9  -6    0.61    0.96
  -8   9   2    3.01    1.25
   8  10  -6   22.71    2.28
  -8  10   2   20.46    2.19
   8  11  -6    0.01    0.88
  -8  11   2    0.80    0.96
   8  12  -6    5.57    1.56
  -8  12   2    0.24    0.99
   8  13  -6   -0.06    0.93
  -8  13   2    1.52    1.19
  -8  14   2    4.07    1.47
  -8  15   2    1.10    1.24
   1  24   2   -0.36    0.60
   1  23   2   15.99    1.87
   1  23   2   12.15    1.67
   1  22   2    1.37    0.99
   1  22   2    0.56    0.65
  -1  22   3   11.69    1.59
   1  21   2   93.43    3.77
   1  21   2   84.52    3.54
  -1  21   3   -0.63    0.72
  -1  21   3   -0.32    0.49
   1  20   2    0.61    0.73
   1  20   2    0.69    0.63
  -1  20   3   14.98    1.64
  -1  20   3   11.59    1.37
   1  19   2   67.39    3.05
   1  19   2   60.57    2.81
  -1  19   3    4.77    1.15
  -1  19   3    5.94    1.08
   1  18   2    0.57    0.68
   1  18   2    1.07    0.59
  -1  18   3  149.70    4.23
  -1  18   3  135.01    3.90
   1  17   2    1.27    0.75
   1  17   2    0.88    0.57
  -1  17   3   11.72    1.32
  -1  17   3   12.27    1.28
   1  16   2   -0.32    0.50
   1  16   2    0.26    0.41
  -1  16   3   77.12    2.88
  -1  16   3   74.08    2.69
   1  15   2   26.61    1.74
   1  15   2   24.31    1.58
  -1  15   3   50.59    2.29
  -1  15   3   48.50    2.11
   1  14   2    1.15    0.64
   1  14   2    2.06    0.62
  -1  14   3   51.24    2.22
  -1  14   3   46.17    1.97
   1  13   2  510.80    6.73
   1  13   2  477.83    6.18
  -1  13   3    2.56    0.71
  -1  13   3    1.63    0.51
   1  12   2    7.06    1.00
   1  12   2    5.48    0.77
  -1  12   3   57.87    2.18
  -1  12   3   51.85    1.89
   1  11   2  412.10    5.61
   1  11   2  363.63    4.92
  -1  11   3   13.44    1.08
  -1  11   3   12.33    0.92
   1  10   2   -0.04    0.37
   1  10   2   -0.15    0.20
  -1  10   3  322.23    4.65
  -1  10   3  311.89    4.07
   1   9   2    0.77    0.40
  -1   9   3  106.28    2.57
  -1   9   3  100.24    2.17
   1   8   2   32.93    1.44
  -1   8   3  396.50    4.73
  -1   8   3  367.04    3.87
   1   7   2  402.50    4.65
  -1   7   3  170.40    2.96
  -1   7   3  164.94    2.40
   1   6   2   59.25    1.70
  -1   6   3  385.91    4.24
  -1   6   3  372.06    3.33
   1   5   2  794.54    5.92
  -1   5   3  179.41    2.75
   1   4   2  853.87    5.83
  -1   4   3   19.06    0.88
   1  -4  -3   12.64    0.87
   1   3   2    0.50    0.21
  -1   3   3  140.87    2.18
   1  -3  -3   85.36    1.60
  -1  -3  -2    3.10    0.55
   1   2   2   10.28    0.56
  -1   2   3  185.46    2.37
  -1  -2  -2    7.88    0.64
   1   1   2   19.23    0.68
  -1   1   3  137.93    1.94
   1   0   2    0.72    0.17
  -1   0   3  646.15    4.30
   1  -1   2   18.09    0.52
  -1  -1   3  131.54    1.78
   1  -2   2   10.70    0.35
   1  -2   2    9.68    0.34
  -1  -2   3  179.21    2.08
  -1   2  -2   11.01    0.61
  -1  -3   3  132.34    1.81
  -1   3  -2    4.90    0.45
   1   4  -3   17.69    0.71
   1   4  -3   17.54    0.69
  -1   4  -2 1012.91    7.11
  -1   4  -2 1001.88    6.33
   1   5  -3  175.64    2.30
   1   5  -3  170.67    2.67
  -1   5  -2  876.39    5.27
  -1   5  -2  839.50    6.08
   1   6  -3  377.93    3.58
   1   6  -3  367.63    4.20
  -1   6  -2   68.15    1.13
  -1   6  -2   60.92    1.72
   1   7  -3  172.43    2.53
   1   7  -3  160.22    2.94
  -1   7  -2  449.59    3.39
  -1   7  -2  410.24    4.71
   1   8  -3  391.92    4.04
   1   8  -3  361.86    4.67
  -1   8  -2   35.37    1.01
  -1   8  -2   32.49    1.42
   1   9  -3  104.30    2.20
   1   9  -3  100.68    2.60
  -1   9  -2    0.61    0.29
  -1   9  -2    0.70    0.38
   1  10  -3  322.69    4.06
   1  10  -3  289.05    4.61
  -1  10  -2    0.44    0.33
  -1  10  -2    0.90    0.45
   1  11  -3   14.36    0.98
   1  11  -3   12.70    1.07
  -1  11  -2  431.15    4.28
  -1  11  -2  394.22    5.57
   1  12  -3   53.29    1.84
   1  12  -3   46.16    2.04
  -1  12  -2    7.05    0.74
  -1  12  -2    7.03    0.95
   1  13  -3    2.01    0.58
   1  13  -3    1.40    0.54
  -1  13  -2  547.75    5.40
  -1  13  -2  496.41    6.79
   1  14  -3   50.17    1.95
   1  14  -3   45.61    2.20
  -1  14  -2    1.55    0.54
  -1  14  -2    2.12    0.69
   1  15  -3   48.30    2.00
   1  15  -3   44.80    2.26
  -1  15  -2   30.54    1.89
   1  16  -3   78.28    2.61
   1  16  -3   65.68    2.82
  -1  16  -2    0.15    0.45
   1  17  -3   11.17    1.30
  -1  17  -2    1.00    0.64
   1  18  -3  122.56    4.10
  -1  18  -2    0.40    0.54
   1  19  -3    3.76    1.03
  -1  19  -2   65.25    3.10
   1  20  -3    9.55    1.44
  -1  20  -2    0.67    0.62
   1  21  -3    0.24    0.61
  -1  21  -2   82.52    3.68
   1  22  -3   10.83    1.65
  -1  22  -2    0.42    0.67
   1  23  -3    8.99    1.62
  -1  23  -2   12.82    1.81
   1  24  -3   27.52    2.44
  -1  24  -2    0.29    0.75
   1  25  -3    4.15    1.37
  -1  25  -2   -0.05    0.66
   3  24   1   11.59    1.98
   3  24   1   13.81    1.98
   3  23   1   11.56    1.93
   3  23   1   12.37    1.80
   3  22   1   11.16    1.84
   3  22   1   10.03    1.60
   3  21   1    0.02    0.84
   3  21   1   -0.47    0.50
   3  20   1    0.15    0.78
   3  20   1    0.15    0.56
   3  19   1    6.71    1.39
   3  19   1    5.45    1.15
  -3  19   4    1.36    0.86
   3  18   1   46.03    2.68
   3  18   1   42.32    2.47
  -3  18   4   39.27    2.35
  -3  18   4   36.96    2.20
   3  17   1   58.38    2.88
   3  17   1   52.97    2.67
  -3  17   4    5.39    1.11
  -3  17   4    6.02    1.10
   3  16   1   19.61    1.72
  -3  16   4    6.66    1.14
  -3  16   4    4.45    0.97
   3  15   1   44.82    2.42
  -3  15   4   54.35    2.48
  -3  15   4   50.78    2.31
   3  14   1    0.50    0.62
  -3  14   4  178.26    4.28
  -3  14   4  166.56    3.93
   3  13   1   47.45    2.35
  -3  13   4    3.92    0.87
  -3  13   4    2.51    0.71
   3  12   1   45.93    2.23
  -3  12   4  122.17    3.36
  -3  12   4  108.99    2.97
   3  11   1    6.09    1.00
  -3  11   4   68.86    2.48
  -3  11   4   63.54    2.21
   3  10   1   78.38    2.72
  -3  10   4   44.09    1.96
  -3  10   4   36.69    1.66
   3   9   1  224.69    4.39
  -3   9   4   36.01    1.73
  -3   9   4   26.78    1.40
   3   8   1   15.73    1.22
  -3   8   4   95.90    2.68
  -3   8   4   73.10    2.12
   3   7   1  191.76    3.82
  -3   7   4   13.19    1.09
  -3   7   4   10.00    0.92
   3   6   1  218.46    3.94
  -3   6   4  274.88    4.30
  -3   6   4  201.51    3.25
   3   5   1    5.37    0.76
  -3   5   4  362.59    4.83
  -3   5   4  248.99    3.52
   3   4   1   21.40    1.22
  -3   4   4  269.66    4.08
  -3   4   4  188.19    3.00
   3   3   1  393.31    4.77
  -3   3   4  239.82    3.79
  -3   3   4  172.23    2.83
  -3  -3  -1  361.77    4.65
   3   2   1  123.89    2.60
  -3   2   4  258.98    3.89
  -3   2   4  209.47    3.10
  -3  -2  -1  107.08    2.53
   3   1   1  311.86    3.99
   3   1   1  298.65    3.92
  -3   1   4   31.72    1.39
  -3   1   4   27.02    1.18
  -3  -1  -1  254.86    3.83
   3   0   1  462.56    4.74
   3   0   1  448.01    4.68
  -3   0   4    0.48    0.34
  -3   0   4    1.48    0.44
  -3   0  -1  353.52    4.50
   3  -1   1  306.98    3.75
   3  -1   1  301.02    3.74
  -3  -1   4   32.21    1.40
  -3   1  -1  227.85    3.64
  -3  -2   4  255.19    3.84
  -3   2  -1  136.30    2.48
  -3   2  -1   90.47    2.37
  -3  -3   4  230.27    3.68
  -3   3  -1  414.19    4.28
  -3   3  -1  288.13    4.21
  -3  -4   4  264.15    3.99
  -3   4  -1   21.42    1.02
  -3   4  -1   14.98    1.11
   3   5  -4  333.32    4.60
   3   5  -4  331.42    4.56
  -3   5  -1    6.34    0.67
  -3   5  -1    3.78    0.69
   3   6  -4  266.82    4.21
   3   6  -4  257.01    4.10
  -3   6  -1  224.72    3.16
   3   7  -4   12.77    1.03
   3   7  -4   12.70    0.99
  -3   7  -1  197.41    3.00
  -3   7  -1  168.91    3.57
   3   8  -4   87.78    2.54
  -3   8  -1   17.77    0.98
  -3   8  -1   16.36    1.24
   3   9  -4   34.22    1.68
  -3   9  -1  230.08    3.38
  -3   9  -1  206.95    4.18
   3  10  -4   43.22    1.92
  -3  10  -1   79.58    2.08
  -3  10  -1   73.29    2.60
   3  11  -4   69.21    2.47
  -3  11  -1    7.29    0.83
  -3  11  -1    5.44    0.91
   3  12  -4  117.76    3.26
  -3  12  -1   49.81    1.79
  -3  12  -1   43.92    2.17
   3  13  -4    3.21    0.83
   3  13  -4    1.92    0.69
  -3  13  -1   45.72    2.30
   3  14  -4  173.63    4.18
   3  14  -4  153.06    4.28
  -3  14  -1    0.89    0.58
   3  15  -4   54.44    2.47
   3  15  -4   46.18    2.46
  -3  15  -1   40.07    2.28
   3  16  -4    6.54    1.16
   3  16  -4    3.89    0.96
  -3  16  -1   17.25    1.61
   3  17  -4    5.95    1.15
   3  17  -4    4.38    1.03
  -3  17  -1   56.28    2.83
   3  18  -4   38.79    2.31
   3  18  -4   32.43    2.29
  -3  18  -1   44.04    2.59
   3  19  -4    0.44    0.64
  -3  19  -1    5.49    1.18
   3  20  -4   54.47    3.11
  -3  20  -1   -0.33    0.51
   3  21  -4   15.21    1.78
  -3  21  -1   -0.42    0.56
   3  22  -4   29.24    2.46
  -3  22  -1   11.38    1.73
   3  23  -4    4.53    1.29
  -3  23  -1   13.69    1.93
   3  24  -4    2.39    1.12
  -3  24  -1   12.89    1.95
   5  22   0   23.84    2.32
   5  21   0    0.61    0.96
   5  21   0   -0.01    0.67
   5  20   0   54.52    3.36
   5  19   0    4.72    1.42
   5  18   0   15.35    2.03
   5  17   0    0.08    0.77
  -5  17   5   90.48    3.71
   5  16   0    7.45    1.47
  -5  16   5   20.66    1.93
   5  15   0    1.94    0.99
  -5  15   5   35.08    2.33
  -5  15   5   23.67    1.90
   5  14   0  144.69    4.68
  -5  14   5   13.52    1.55
  -5  14   5    8.45    1.32
   5  13   0    3.38    1.01
  -5  13   5    0.68    0.69
  -5  13   5    0.31    0.73
   5  12   0  128.62    4.21
  -5  12   5   13.81    1.45
  -5  12   5   10.62    1.40
   5  11   0   12.10    1.43
  -5  11   5   31.36    2.01
  -5  11   5   21.32    1.72
   5  10   0   85.49    3.30
  -5  10   5   17.54    1.53
  -5  10   5    9.79    1.33
   5   9   0   15.31    1.51
  -5   9   5  225.43    4.94
  -5   9   5  160.43    3.96
   5   8   0    7.82    1.25
  -5   8   5   32.55    1.93
  -5   8   5   22.99    1.69
   5   7   0    8.66    1.25
  -5   7   5  157.84    4.04
  -5   7   5  108.72    3.18
   5   6   0   46.73    2.27
  -5   6   5   17.53    1.43
  -5   6   5   13.75    1.34
   5   5   0   17.48    1.42
  -5   5   5   50.10    2.27
  -5   5   5   34.54    1.86
   5   4   0  171.15    4.09
  -5   4   5    5.43    0.95
  -5   4   5    4.32    0.91
   5   3   0    0.67    0.55
  -5   3   5    0.84    0.57
  -5   3   5   -0.18    0.53
  -5  -3   0    0.95    0.64
   5   2   0   57.31    2.32
   5   2   0   58.01    2.34
  -5   2   5   14.08    1.26
  -5   2   5   11.04    1.17
  -5  -2   0   51.39    2.33
   5   1   0    0.11    0.43
   5   1   0    0.18    0.44
  -5   1   5  194.52    4.30
  -5   1   5  167.93    3.78
  -5  -1   0    0.27    0.58
   5   0   0    0.13    0.45
   5   0   0    0.42    0.45
  -5   0   5    1.93    0.65
  -5   0   5    1.81    0.71
  -5   0   0   -0.41    0.50
   5  -1   0    0.06    0.43
   5  -1   0   -0.04    0.38
  -5  -1   5  185.30    4.21
  -5   1   0    0.43    0.65
  -5  -2   5   15.19    1.30
  -5   2   0   58.07    2.22
  -5   2   0   42.53    2.15
  -5  -3   5    0.48    0.50
  -5   3   0    0.67    0.51
  -5   3   0    0.90    0.72
  -5  -4   5    4.64    0.90
  -5   4   0  178.78    3.80
  -5   4   0  123.03    3.57
   5   5  -5   44.30    2.22
   5   5  -5   46.23    2.23
  -5   5   0   18.15    1.31
  -5   5   0   12.39    1.45
   5   6  -5   19.99    1.56
   5   6  -5   16.62    1.40
  -5   6   0   47.76    2.03
  -5   6   0   34.74    2.10
   5   7  -5  159.42    4.18
   5   7  -5  153.98    4.09
  -5   7   0    9.53    1.05
  -5   7   0    5.72    1.14
   5   8  -5   29.38    1.91
   5   8  -5   30.13    1.89
  -5   8   0    8.00    1.06
  -5   8   0    4.71    1.10
   5   9  -5  223.27    5.07
  -5   9   0   15.50    1.28
  -5   9   0   10.16    1.41
   5  10  -5   16.83    1.55
  -5  10   0   86.58    2.75
  -5  10   0   59.94    2.77
   5  11  -5   26.60    1.93
  -5  11   0    9.97    1.47
   5  12  -5   13.93    1.49
  -5  12   0   95.58    3.59
   5  13  -5   -0.34    0.60
  -5  13   0    2.03    0.92
   5  14  -5   13.00    1.53
  -5  14   0  108.77    3.99
   5  15  -5   30.23    2.21
   5  16  -5   17.35    1.79
  -5  16   0    4.32    1.20
   5  17  -5   87.45    3.77
  -5  17   0    1.58    0.94
   5  18  -5    9.96    1.63
   5  18  -5    5.64    1.26
  -5  18   0   10.95    1.69
   5  19  -5   18.99    2.03
   5  19  -5   17.35    1.93
  -5  19   0    6.23    1.44
   5  20  -5    0.36    0.67
  -5  20   0   47.47    3.08
   5  21  -5   -0.44    0.53
  -5  21   0    0.33    0.89
   5  22  -5    0.22    0.67
  -5  22   0   24.63    2.42
   7  16  -1   28.78    2.63
   7  15  -1   23.35    2.37
   7  14  -1    8.44    1.71
  -7  14   6   11.07    1.72
   7  13  -1    2.02    1.09
  -7  13   6   52.13    3.00
   7  12  -1    0.43    0.83
  -7  12   6   14.35    1.70
   7  11  -1    3.93    1.24
  -7  11   6   28.71    2.22
  -7  11   6   21.19    1.95
   7  10  -1    8.72    1.57
  -7  10   6   10.94    1.62
  -7  10   6    6.82    1.33
   7   9  -1   23.05    2.07
  -7   9   6   10.81    1.61
  -7   9   6    7.29    1.34
   7   8  -1   28.76    2.26
  -7   8   6    0.58    0.75
  -7   8   6    0.43    0.74
   7   7  -1   54.52    2.97
  -7   7   6    6.91    1.33
  -7   7   6    4.48    1.12
   7   6  -1    6.10    1.33
  -7   6   6   14.54    1.58
  -7   6   6    9.47    1.45
   7   5  -1    7.15    1.34
  -7   5   6   56.26    2.89
  -7   5   6   44.48    2.50
   7   4  -1   20.77    1.87
  -7   4   6   47.91    2.68
  -7   4   6   42.51    2.45
   7   3  -1   11.26    1.59
  -7   3   6   73.70    3.28
  -7   3   6   54.87    2.74
   7   2  -1   37.67    2.38
   7   2  -1   33.36    2.22
  -7   2   6   19.48    1.76
  -7   2   6   16.89    1.66
  -7  -2   1   31.25    2.26
   7   1  -1   37.09    2.37
   7   1  -1   31.03    2.11
  -7   1   6    6.34    1.24
  -7   1   6    6.22    1.22
  -7  -1   1   24.89    2.07
   7   0  -1  181.62    4.88
   7   0  -1  172.11    4.76
  -7   0   6   -0.19    0.56
  -7   0   1  155.79    4.75
   7  -1  -1   40.22    2.39
   7  -1  -1   36.02    2.24
  -7  -1   6    6.50    1.26
  -7   1   1   28.77    2.23
   7  -2  -1   37.97    2.30
   7  -2  -1   35.67    2.20
  -7  -2   6   20.00    1.81
  -7   2   1   30.19    2.25
   7  -3  -1    8.47    1.42
   7  -3  -1   11.15    1.35
  -7  -3   6   71.24    3.25
   7   3  -6   70.99    3.26
  -7   3   1   10.00    1.57
   7   4  -6   49.85    2.81
   7   4  -6   48.42    2.74
  -7   4   1   21.58    1.77
  -7   4   1   16.58    1.78
   7   5  -6   56.09    2.97
   7   5  -6   56.57    2.97
  -7   5   1    9.68    1.40
  -7   5   1    5.38    1.33
   7   6  -6   14.10    1.63
   7   6  -6   14.43    1.61
  -7   6   1    6.30    1.22
  -7   6   1    5.42    1.30
   7   7  -6    4.28    1.21
   7   7  -6    4.19    1.13
  -7   7   1   62.12    2.84
  -7   7   1   39.16    2.59
   7   8  -6   -0.27    0.72
   7   8  -6   -0.19    0.63
  -7   8   1   17.55    1.92
   7   9  -6    8.26    1.50
  -7   9   1   15.70    1.88
   7  10  -6   11.77    1.75
  -7  10   1    6.81    1.50
   7  11  -6   29.96    2.39
  -7  11   1    3.75    1.30
   7  12  -6   15.78    1.86
  -7  12   1    1.33    1.05
   7  13  -6   50.56    3.12
  -7  13   1    1.21    1.04
   7  14  -6   12.89    2.00
  -7  14   1    5.41    1.49
   7  15  -6   24.19    2.38
  -7  15   1   16.09    2.18
   7  16  -6    2.35    1.24
  -7  16   1   15.73    2.23
   7  17  -6    2.09    1.23
  -7  17   1   13.88    2.19
  -7  18   1    3.52    1.47
  -9   9   7    0.17    0.86
  -9   8   7   41.79    3.02
   9   7  -2    5.83    1.60
  -9   7   7    0.57    0.95
  -9   7   7    0.61    0.89
   9   6  -2    1.63    1.13
  -9   6   7   13.42    2.05
  -9   6   7    9.55    1.70
  -9   5   7    0.19    0.86
  -9   5   7   -0.02    0.73
   9   4  -2   -0.07    0.92
  -9   4   7    0.69    0.98
  -9   4   7    1.31    0.93
  -9   3   7    0.89    0.98
   9   2  -2    0.48    0.95
  -9   2   7   28.52    2.51
  -9   1   7    7.42    1.61
   9   0  -2   -0.58    0.81
   9   0  -2    0.35    0.72
  -9   0   7   46.63    3.12
   9   0  -7   54.48    3.40
   9   0  -7   44.61    3.05
  -9   0   2    0.53    0.91
   9   1  -7    5.25    1.53
   9   1  -7    7.48    1.58
  -9   1   2    8.76    1.70
   9  -2  -2    0.59    0.99
   9  -2  -2    0.00    0.75
   9   2  -7   25.32    2.47
   9   2  -7   27.28    2.44
  -9   2   2    1.79    1.08
   9  -3  -2   20.68    2.08
   9   3  -7    0.22    0.98
   9   3  -7    0.18    0.85
  -9   3   2   18.47    2.11
   9  -4  -2    0.00    0.78
   9   4  -7    0.13    1.04
   9   4  -7   -0.53    0.72
  -9   4   2    0.10    0.87
   9   5  -7   -0.50    1.04
   9   5  -7   -0.62    0.75
  -9   5   2   29.45    2.60
   9   6  -7   13.26    1.98
  -9   6   2    1.47    1.11
  -9   7   2    6.64    1.61
  -9   8   2    0.85    1.07
  -9   9   2   -0.51    0.88
  -9  10   2    0.36    1.01
   0  22   3    3.72    1.19
   0  22   3    5.36    1.20
   0  21   3   77.06    3.44
   0  21   3   69.90    3.16
   0  20   3    5.06    1.19
   0  20   3    5.35    1.09
   0  19   3   95.20    3.57
   0  19   3   94.96    3.40
   0  18   3    0.66    0.70
   0  18   3    0.39    0.56
   0  17   3   12.27    1.37
   0  17   3    9.38    1.12
   0  16   3    2.69    0.84
   0  16   3    2.76    0.71
   0  15   3   37.45    2.02
   0  15   3   33.18    1.76
   0  14   3   44.19    2.12
   0  14   3   40.89    1.85
   0  13   3   91.06    2.87
   0  13   3   88.05    2.55
   0  12   3   43.35    1.93
   0  12   3   41.05    1.67
   0  11   3  247.91    4.31
   0  11   3  228.95    3.67
   0  10   3   13.41    1.07
   0  10   3   12.79    0.88
   0   9   3   52.12    1.86
   0   9   3   52.54    1.58
   0   8   3    7.30    0.75
   0   8   3    5.84    0.55
   0   7   3   20.60    1.08
   0   7   3   22.46    0.89
   0   6   3   10.23    0.74
   0   6   3   21.78    0.79
   0   5   3  225.70    3.06
   0   4   3  224.65    2.87
   0  -4  -3  160.59    2.49
   0   3   3  917.58    5.64
   0  -3  -3 1439.47    7.29
   0   2   3    0.73    0.22
   0  -2  -3    0.64    0.33
   0   1   3  709.52    4.41
   0  -1  -3  470.70    3.63
   0   0   3    0.24    0.14
   0   0  -3    0.11    0.17
   0  -1   3  676.38    4.44
   0   1  -3  603.90    4.16
   0  -2   3    0.35    0.12
   0   3  -3 2757.72   13.37
   0   4  -3  253.39    2.21
   0   4  -3  241.43    2.89
   0   5  -3  332.60    2.60
   0   5  -3  298.20    3.48
   0   6  -3   21.02    1.01
   0   7  -3   26.44    0.80
   0   8  -3    7.37    0.53
   0   8  -3    6.56    0.68
   0   9  -3   57.06    1.41
   0  10  -3   13.76    0.84
   0  11  -3  260.87    3.38
   0  11  -3  220.97    4.18
   0  12  -3   44.44    1.52
   0  12  -3   39.16    1.87
   0  13  -3   94.86    2.30
   0  13  -3   85.37    2.85
   0  14  -3   48.21    1.77
   0  14  -3   40.42    2.07
   0  15  -3   35.99    2.04
   0  16  -3    1.85    0.71
   0  17  -3   11.67    1.35
   0  18  -3    1.77    0.79
   0  19  -3   84.93    3.54
   0  20  -3    4.74    1.17
   0  21  -3   69.52    3.42
   0  22  -3    4.06    1.20
   0  23  -3   11.06    1.71
   0  24  -3    2.40    1.09
   0  25  -3   -0.13    0.66
   2  24   2   10.60    1.81
   2  24   2   11.50    1.76
   2  23   2    2.56    1.22
   2  23   2    2.25    0.93
   2  22   2    6.18    1.44
   2  22   2    5.19    1.22
   2  21   2    4.12    1.17
   2  21   2    3.30    1.04
  -2  21   4    0.84    0.90
   2  20   2    0.25    0.73
   2  20   2    1.11    0.71
  -2  20   4    3.96    1.13
   2  19   2    0.54    0.75
   2  19   2    0.25    0.51
  -2  19   4   30.38    2.14
  -2  19   4   26.59    1.90
   2  18   2   52.79    2.76
   2  18   2   43.22    2.38
  -2  18   4   21.83    1.82
  -2  18   4   20.17    1.64
   2  17   2   41.04    2.38
   2  17   2   35.58    2.10
  -2  17   4   51.44    2.54
  -2  17   4   49.56    2.34
   2  16   2   66.18    2.88
   2  16   2   56.81    2.53
  -2  16   4   95.95    3.31
  -2  16   4   90.07    2.98
   2  15   2   10.46    1.25
   2  15   2    9.37    1.07
  -2  15   4   70.89    2.77
  -2  15   4   71.57    2.56
   2  14   2   70.18    2.77
   2  14   2   58.77    2.40
  -2  14   4   51.33    2.30
  -2  14   4   48.80    2.05
   2  13   2    1.80    0.68
  -2  13   4    3.17    0.81
  -2  13   4    4.56    0.78
   2  12   2   23.29    1.57
  -2  12   4   -0.04    0.44
  -2  12   4    0.11    0.33
   2  11   2   75.63    2.60
  -2  11   4   26.32    1.55
  -2  11   4   24.95    1.30
   2  10   2  100.43    2.87
  -2  10   4  312.00    4.85
  -2  10   4  302.29    4.12
   2   9   2   33.53    1.65
  -2   9   4  225.52    4.00
  -2   9   4  205.95    3.23
   2   8   2  386.26    5.19
  -2   8   4  293.04    4.39
  -2   8   4  266.18    3.48
   2   7   2  178.11    3.39
  -2   7   4  283.82    4.18
  -2   7   4  248.72    3.18
   2   6   2  266.80    3.98
  -2   6   4  152.63    2.96
  -2   6   4  125.04    2.13
   2   5   2    1.64    0.46
  -2   5   4   28.70    1.28
  -2   5   4   21.16    0.89
   2   4   2   21.05    1.07
  -2   4   4    1.70    0.42
  -2   4   4    1.43    0.35
   2  -4  -4    1.80    0.56
   2   3   2  179.10    2.84
  -2   3   4  150.83    2.68
  -2   3   4  104.62    1.72
  -2  -3  -2  165.13    2.69
  -2  -3  -2  117.91    2.12
   2   2   2  327.53    3.66
  -2   2   4    1.78    0.45
  -2   2   4    0.69    0.28
   2  -2  -4    1.46    0.43
  -2  -2  -2  259.13    3.31
  -2  -2  -2  189.77    2.49
   2   1   2  375.30    3.72
  -2   1   4  417.23    4.27
  -2   1   4  366.96    3.27
   2  -1  -4  306.34    2.85
  -2  -1  -2  277.89    3.40
  -2  -1  -2  201.23    2.44
   2   0   2  648.63    4.72
  -2   0   4   36.86    1.28
  -2   0  -2  484.29    4.52
  -2   0  -2  458.43    3.59
   2  -1   2  358.40    3.29
   2  -1   2  352.37    3.28
  -2  -1   4  406.55    4.13
  -2   1  -2  255.26    3.32
   2  -2   2  304.42    2.89
   2  -2   2  313.98    2.98
  -2  -2   4    2.31    0.43
  -2   2  -2  247.94    3.34
  -2   2  -2  290.90    2.86
  -2  -3   4  141.08    2.44
  -2   3  -2  184.31    2.20
  -2  -4   4    2.17    0.42
  -2   4  -2   23.03    0.79
  -2   4  -2   19.31    1.05
   2   5  -4   27.61    1.14
  -2   5  -2    1.39    0.30
  -2   5  -2    1.42    0.42
   2   6  -4  147.35    2.69
   2   6  -4  137.55    2.58
  -2   6  -2  284.57    2.79
  -2   6  -2  269.32    4.00
   2   7  -4  264.70    3.71
  -2   7  -2  187.79    2.33
  -2   7  -2  176.42    3.37
   2   8  -4  272.07    3.88
  -2   8  -2  422.96    3.71
  -2   8  -2  395.94    5.24
   2   9  -4  211.70    3.54
  -2   9  -2   36.08    1.18
  -2   9  -2   31.74    1.60
   2  10  -4  314.34    4.46
   2  10  -4  286.48    4.84
  -2  10  -2  106.19    2.04
  -2  10  -2   92.88    2.76
   2  11  -4   25.01    1.38
   2  11  -4   21.86    1.44
  -2  11  -2   80.18    1.89
  -2  11  -2   75.61    2.59
   2  12  -4   -0.06    0.37
   2  12  -4    0.23    0.36
  -2  12  -2   24.35    1.17
  -2  12  -2   25.42    1.63
   2  13  -4    4.02    0.78
   2  13  -4    2.81    0.73
  -2  13  -2    1.01    0.58
   2  14  -4   50.27    2.13
   2  14  -4   43.57    2.23
  -2  14  -2   64.70    2.68
   2  15  -4   75.28    2.63
   2  15  -4   67.42    2.86
  -2  15  -2    8.01    1.17
   2  16  -4   98.91    3.09
   2  16  -4   82.93    3.27
  -2  16  -2   62.16    2.80
   2  17  -4   55.60    2.42
   2  17  -4   45.94    2.53
  -2  17  -2   35.08    2.20
   2  18  -4   17.70    1.70
  -2  18  -2   45.31    2.57
   2  19  -4   23.03    1.97
  -2  19  -2    0.12    0.60
   2  20  -4    2.42    0.92
  -2  20  -2    0.97    0.74
   2  21  -4    0.75    0.77
  -2  21  -2    3.53    1.10
   2  22  -4    3.78    1.19
  -2  22  -2    5.56    1.31
   2  23  -4   23.85    2.27
  -2  23  -2    2.97    1.13
   2  24  -4    8.30    1.62
  -2  24  -2   14.01    1.97
   2  25  -4   12.62    1.95
  -2  25  -2   12.13    1.91
   4  23   1    2.36    1.31
   4  23   1    2.12    1.05
   4  22   1   28.19    2.55
   4  22   1   29.31    2.45
   4  21   1    4.00    1.36
   4  21   1    2.60    1.00
   4  20   1   55.89    3.25
   4  20   1   48.87    2.93
   4  19   1   11.52    1.76
   4  19   1    8.94    1.40
  -4  19   5   -0.44    0.71
   4  18   1   30.22    2.34
  -4  18   5   20.77    1.90
   4  17   1    0.22    0.73
  -4  17   5   -0.14    0.64
   4  16   1    0.99    0.82
  -4  16   5    0.43    0.72
   4  15   1    1.32    0.89
  -4  15   5   13.91    1.48
  -4  15   5    8.95    1.24
   4  14   1    9.56    1.42
  -4  14   5   14.86    1.50
  -4  14   5   10.34    1.24
   4  13   1   19.14    1.68
  -4  13   5    0.56    0.63
  -4  13   5    0.69    0.64
   4  12   1   62.09    2.77
  -4  12   5  127.31    3.73
  -4  12   5   91.91    2.93
   4  11   1    2.32    0.82
  -4  11   5   -0.01    0.52
  -4  11   5    0.62    0.59
   4  10   1   84.97    3.06
  -4  10   5  115.31    3.41
  -4  10   5   79.64    2.60
   4   9   1    1.02    0.61
  -4   9   5    9.17    1.10
  -4   9   5    7.15    1.00
   4   8   1    3.00    0.76
  -4   8   5   45.94    2.11
  -4   8   5   31.81    1.67
   4   7   1   64.08    2.49
  -4   7   5    4.26    0.86
  -4   7   5    3.23    0.80
   4   6   1  165.11    3.82
  -4   6   5  541.84    6.78
  -4   6   5  361.96    4.91
   4   5   1   45.98    2.01
  -4   5   5   28.70    1.62
  -4   5   5   21.43    1.35
   4   4   1  681.80    7.33
  -4   4   5  482.41    6.22
  -4   4   5  351.36    4.72
  -4  -4  -1  614.65    7.06
   4   3   1   28.95    1.54
  -4   3   5   32.88    1.67
  -4   3   5   27.13    1.41
  -4  -3  -1   24.82    1.54
   4   2   1  248.58    4.22
  -4   2   5  381.92    5.45
  -4   2   5  311.97    4.43
  -4  -2  -1  214.11    4.11
   4   1   1    0.97    0.49
   4   1   1    1.20    0.47
  -4   1   5    0.32    0.44
  -4   1   5    0.05    0.40
  -4  -1  -1    0.96    0.57
   4   0   1   -0.09    0.34
   4   0   1    1.24    0.46
  -4   0   5    0.26    0.38
  -4   0   5    2.56    0.63
  -4   0  -1    0.20    0.43
   4  -1   1    0.80    0.44
   4  -1   1    2.62    0.57
  -4  -1   5    0.50    0.43
   4   1  -5    0.16    0.24
  -4   1  -1    1.31    0.61
  -4  -2   5  379.24    5.42
  -4   2  -1  261.90    4.04
  -4   2  -1  180.09    3.80
  -4  -3   5   32.34    1.65
  -4   3  -1   28.28    1.40
  -4   3  -1   19.16    1.44
  -4  -4   5  451.53    6.00
  -4   4  -1  696.18    6.48
  -4   4  -1  480.29    6.30
  -4   4  -1  620.34    4.35
  -4  -5   5   28.38    1.59
  -4   5  -1   48.04    1.74
  -4   5  -1   32.43    1.81
   4   6  -5  515.00    6.64
   4   6  -5  503.81    6.54
  -4   6  -1  176.79    3.26
  -4   6  -1  125.68    3.38
   4   7  -5    4.84    0.89
   4   7  -5    5.16    0.85
  -4   7  -1   64.87    2.01
  -4   7  -1   46.26    2.17
   4   8  -5   44.52    2.07
   4   8  -5   42.24    1.99
  -4   8  -1    4.63    0.73
  -4   8  -1    2.53    0.78
   4   9  -5    8.86    1.04
  -4   9  -1    1.13    0.49
  -4   9  -1    0.64    0.63
   4  10  -5  105.40    3.26
  -4  10  -1   92.05    2.46
   4  11  -5    0.35    0.56
  -4  11  -1    1.79    0.76
   4  12  -5  113.73    3.51
  -4  12  -1   54.09    2.59
   4  13  -5    0.43    0.61
  -4  13  -1   18.58    1.62
   4  14  -5   15.15    1.50
  -4  14  -1    9.53    1.39
   4  15  -5   12.71    1.43
   4  15  -5    6.38    1.14
  -4  15  -1    0.50    0.63
   4  16  -5    0.45    0.70
   4  16  -5    0.22    0.51
  -4  16  -1    0.05    0.62
   4  17  -5   -0.01    0.66
   4  17  -5    0.08    0.52
  -4  17  -1    1.04    0.78
   4  18  -5   20.42    1.90
   4  18  -5   17.82    1.83
  -4  18  -1   30.73    2.31
   4  19  -5    0.37    0.65
  -4  19  -1    9.30    1.55
   4  20  -5   33.48    2.56
  -4  20  -1   50.57    3.05
   4  21  -5    1.97    1.01
  -4  21  -1    3.02    1.15
   4  22  -5   12.95    1.91
  -4  22  -1   27.72    2.47
   4  23  -5   -0.52    0.59
  -4  23  -1    2.68    1.19
   6  19   0    9.07    1.83
   6  18   0    0.00    0.93
   6  17   0   44.24    3.04
   6  16   0   17.84    2.01
  -6  16   6   28.04    2.28
   6  15   0   36.81    2.67
  -6  15   6   19.53    1.91
   6  14   0    0.99    0.88
  -6  14   6   16.75    1.75
   6  13   0    5.50    1.34
  -6  13   6    4.58    1.16
   6  12   0    1.41    0.93
  -6  12   6    0.77    0.76
   6  11   0   22.69    2.00
  -6  11   6   11.28    1.55
  -6  11   6    6.40    1.22
   6  10   0   30.12    2.23
  -6  10   6    3.71    1.04
  -6  10   6    2.56    0.96
   6   9   0   94.59    3.70
  -6   9   6   42.52    2.43
  -6   9   6   28.58    1.98
   6   8   0    8.85    1.42
  -6   8   6   30.03    2.05
  -6   8   6   23.59    1.79
   6   7   0  155.24    4.53
  -6   7   6   21.37    1.74
  -6   7   6   14.84    1.50
   6   6   0   10.31    1.46
  -6   6   6   57.51    2.72
  -6   6   6   40.32    2.20
   6   5   0   11.47    1.35
  -6   5   6   10.06    1.38
  -6   5   6    6.79    1.16
   6   4   0    3.88    1.02
  -6   4   6    1.88    0.78
  -6   4   6    2.38    0.86
   6   3   0    8.07    1.23
  -6   3   6   51.16    2.53
  -6   3   6   44.20    2.27
  -6  -3   0    7.33    1.25
   6   2   0    2.56    0.83
   6   2   0    2.26    0.73
  -6   2   6  108.79    3.62
  -6   2   6   97.78    3.26
  -6  -2   0    2.29    0.93
   6   1   0   74.65    2.91
   6   1   0   76.54    2.91
  -6   1   6  298.59    5.94
  -6   1   6  264.09    5.27
  -6  -1   0   61.93    2.83
   6   0   0   70.77    2.80
   6   0   0   67.91    2.72
  -6   0   6   23.01    1.76
  -6   0   0   56.63    2.71
   6  -1   0   74.39    2.83
   6  -1   0   75.89    2.85
  -6  -1   6  298.83    5.95
  -6   1   0   59.95    2.79
   6  -2   0    2.81    0.83
   6  -2   0    2.49    0.74
  -6  -2   6  101.91    3.53
  -6   2   0    2.16    0.97
   6  -3   0    7.15    1.12
   6  -3   0    8.77    1.05
  -6  -3   6   50.07    2.54
  -6   3   0    6.26    1.25
  -6  -4   6    1.52    0.76
  -6   4   0    4.27    0.93
  -6   4   0    3.46    1.09
   6   5  -6    6.67    1.24
   6   5  -6    8.00    1.23
  -6   5   0   14.18    1.35
  -6   5   0   10.25    1.48
   6   6  -6   54.51    2.72
   6   6  -6   53.58    2.67
  -6   6   0    8.92    1.24
  -6   6   0    7.61    1.38
   6   7  -6   21.91    1.81
   6   7  -6   21.81    1.74
  -6   7   0  160.93    4.02
  -6   7   0  112.65    3.93
   6   8  -6   31.47    2.16
   6   8  -6   29.66    2.04
  -6   8   0    9.05    1.22
  -6   8   0    6.54    1.35
   6   9  -6   41.21    2.47
  -6   9   0   71.99    3.27
   6  10  -6    3.24    1.03
  -6  10   0   22.44    2.02
   6  11  -6    8.88    1.48
  -6  11   0   15.15    1.75
   6  12  -6    0.35    0.74
  -6  12   0    0.25    0.85
   6  13  -6    2.74    1.07
  -6  13   0    4.76    1.29
   6  14  -6   17.29    1.86
  -6  14   0    0.48    0.91
   6  15  -6   17.83    1.95
  -6  15   0   29.44    2.39
   6  16  -6   28.21    2.38
  -6  16   0   15.69    1.90
   6  17  -6   20.00    2.09
  -6  17   0   30.82    2.57
   6  18  -6   12.03    1.92
  -6  18   0    0.60    1.02
   6  19  -6    0.96    1.05
   6  19  -6    0.94    0.77
  -6  19   0    8.68    1.75
   6  20  -6    0.94    0.83
  -6  20   0   -0.51    0.94
  -8  13   7   49.79    3.22
   8  12  -1    3.85    1.46
  -8  12   7   -0.43    0.84
   8  11  -1   16.28    2.26
  -8  11   7   59.59    3.41
   8  10  -1    4.64    1.44
  -8  10   7   -0.02    0.87
   8   9  -1    1.88    1.17
  -8   9   7   16.12    1.90
   8   8  -1    3.78    1.25
  -8   8   7   -0.07    0.71
  -8   8   7    0.80    0.86
   8   7  -1   14.80    2.04
  -8   7   7    6.27    1.41
  -8   7   7    5.50    1.30
   8   6  -1   10.95    1.77
  -8   6   7   -0.58    0.62
  -8   6   7    0.69    0.83
   8   5  -1   55.75    3.18
  -8   5   7   55.59    3.15
  -8   5   7   41.58    2.62
   8   4  -1    4.93    1.31
  -8   4   7   11.40    1.70
  -8   4   7    8.50    1.48
   8   3  -1   72.49    3.51
  -8   3   7   43.65    2.78
  -8   3   7   35.91    2.45
   8   2  -1   -0.33    0.79
  -8   2   7    6.42    1.38
   8   1  -1   17.46    1.87
   8   1  -1   16.15    1.77
  -8   1   7    7.66    1.49
  -8  -1   1   13.63    1.88
   8   0  -1   -0.48    0.75
   8   0  -1    0.42    0.72
  -8   0   7    0.25    0.71
  -8   0   1    0.51    0.90
   8  -1  -1   15.49    1.78
   8  -1  -1   14.00    1.63
  -8  -1   7    7.19    1.44
  -8   1   1   11.52    1.78
   8  -2  -1    0.57    0.84
   8  -2  -1    0.01    0.71
  -8  -2   7    6.50    1.37
  -8   2   1    0.74    0.96
   8  -3  -1   71.52    3.35
   8  -3  -1   74.60    3.39
   8   3  -7   43.24    2.85
   8   3  -7   40.87    2.73
  -8   3   1   62.33    3.38
   8  -4  -1    6.50    1.42
   8  -4  -1    6.51    1.28
   8   4  -7   10.05    1.74
   8   4  -7   12.96    1.80
  -8   4   1    8.01    1.57
   8  -5  -1   53.86    2.90
   8   5  -7   53.55    3.19
   8   5  -7   51.23    3.08
  -8   5   1   40.06    2.79
   8   6  -7    0.15    0.85
   8   6  -7   -0.60    0.64
  -8   6   1    8.98    1.67
   8   7  -7    5.25    1.41
   8   7  -7    6.69    1.43
  -8   7   1   11.41    1.86
   8   8  -7    0.70    0.92
  -8   8   1    4.02    1.32
   8   9  -7   17.59    2.03
  -8   9   1    1.82    1.17
   8  10  -7    0.08    0.91
  -8  10   1    4.22    1.38
   8  11  -7   55.57    3.44
  -8  11   1   13.22    2.01
   8  12  -7    0.08    0.96
  -8  12   1    3.30    1.35
  -8  13   1    9.28    1.89
  -8  14   1    6.09    1.73
   1  24   3   30.06    2.50
   1  23   3    0.92    0.99
   1  22   3   31.35    2.42
   1  22   3   26.13    2.08
  -1  22   4    7.64    1.47
   1  21   3    0.95    0.85
   1  21   3    1.63    0.82
  -1  21   4   63.83    3.18
   1  20   3    0.99    0.82
   1  20   3   -0.08    0.48
  -1  20   4   17.01    1.77
   1  19   3   -0.02    0.62
   1  19   3   -0.05    0.44
  -1  19   4   62.37    2.96
  -1  19   4   58.84    2.67
   1  18   3   52.66    2.71
   1  18   3   49.40    2.43
  -1  18   4    8.88    1.41
  -1  18   4    8.03    1.19
   1  17   3   45.42    2.48
   1  17   3   35.12    2.00
  -1  17   4    8.32    1.32
  -1  17   4    7.66    1.10
   1  16   3  116.87    3.70
   1  16   3  106.22    3.26
  -1  16   4   13.80    1.41
  -1  16   4   12.78    1.21
   1  15   3    0.10    0.51
   1  15   3    1.00    0.53
  -1  15   4   47.44    2.30
  -1  15   4   45.02    2.00
   1  14   3  193.24    4.44
   1  14   3  170.62    3.80
  -1  14   4   42.73    2.11
  -1  14   4   42.40    1.85
   1  13   3    8.64    1.17
   1  13   3    7.60    0.87
  -1  13   4  145.91    3.66
  -1  13   4  138.08    3.10
   1  12   3   30.04    1.71
   1  12   3   28.08    1.45
  -1  12   4   73.18    2.53
  -1  12   4   71.34    2.13
   1  11   3   52.83    2.13
   1  11   3   49.75    1.81
  -1  11   4  107.19    2.92
  -1  11   4  103.97    2.41
   1  10   3   93.28    2.68
  -1  10   4   30.73    1.56
  -1  10   4   29.33    1.23
   1   9   3   57.87    2.04
  -1   9   4   14.19    1.07
  -1   9   4   13.03    0.81
   1   8   3  332.93    4.60
  -1   8   4   15.21    1.07
  -1   8   4   14.95    0.79
   1   7   3   12.10    0.90
  -1   7   4    6.98    0.72
  -1   7   4    6.61    0.51
   1   6   3   25.12    1.19
  -1   6   4   33.08    1.36
  -1   6   4   30.50    0.89
   1   5   3   69.55    1.82
  -1   5   4  441.66    4.61
   1  -5  -4  296.47    3.61
   1   4   3   48.40    1.44
  -1   4   4  118.85    2.28
   1  -4  -4   69.19    1.72
  -1  -4  -3   37.72    1.43
   1   3   3    4.52    0.49
  -1   3   4 1303.30    7.43
   1  -3  -4  731.13    5.14
  -1  -3  -3    2.08    0.39
  -1  -3  -3    2.92    0.63
   1   2   3 2281.93   13.27
  -1   2   4  515.17    4.33
   1  -2  -4  328.96    3.26
  -1  -2  -3 1656.26   10.44
  -1  -2  -3 1177.02    6.61
   1   1   3  242.48    2.59
  -1   1   4   60.55    1.41
   1  -1  -4   43.80    1.19
  -1  -1  -3  170.61    2.12
   1   0   3 1175.10    6.10
  -1   0   4    0.29    0.23
   1   0  -4    0.13    0.24
  -1   0  -3  837.17    5.05
  -1   0  -3  869.31    5.35
   1  -1   3  248.91    2.22
  -1  -1   4   57.85    1.28
   1   1  -4   53.22    1.30
  -1   1  -3  211.92    2.52
  -1   1  -3  205.04    2.50
   1  -2   3 2250.18   14.45
  -1  -2   4  489.47    3.74
  -1   2  -3 2223.99   10.80
  -1  -3   4 1202.31    6.30
   1   3  -4 1257.42    6.78
  -1   3  -3    5.25    0.52
  -1  -4   4  108.24    1.73
   1   4  -4  113.49    2.09
  -1   4  -3   61.29    1.61
   1   5  -4  424.49    3.66
   1   5  -4  415.86    4.32
   1   5  -4  399.18    3.49
  -1   5  -3   84.81    1.99
   1   6  -4   31.06    1.02
   1   6  -4   30.67    1.26
  -1   6  -3   29.42    1.26
   1   7  -4    6.61    0.57
   1   7  -4    6.49    0.66
  -1   7  -3   12.30    0.50
  -1   7  -3   11.40    0.87
   1   8  -4   15.69    0.86
   1   8  -4   14.20    0.99
  -1   8  -3  373.42    2.98
  -1   8  -3  334.53    4.62
   1   9  -4   14.90    0.91
   1   9  -4   11.93    0.98
  -1   9  -3   62.32    1.30
  -1   9  -3   53.44    1.96
   1  10  -4   33.34    1.32
   1  10  -4   29.20    1.53
  -1  10  -3  100.11    1.76
  -1  10  -3   88.31    2.62
   1  11  -4  111.79    2.44
   1  11  -4   95.72    2.84
  -1  11  -3   56.98    1.46
  -1  11  -3   49.65    2.06
   1  12  -4   72.65    2.07
   1  12  -4   63.10    2.41
  -1  12  -3   34.19    1.26
  -1  12  -3   34.59    1.82
   1  13  -4  146.48    3.04
   1  13  -4  127.66    3.56
  -1  13  -3    7.24    1.04
   1  14  -4   47.85    1.85
   1  14  -4   44.13    2.20
  -1  14  -3  173.33    4.28
   1  15  -4   49.35    1.97
   1  15  -4   41.76    2.22
  -1  15  -3    0.69    0.55
   1  16  -4   12.63    1.35
  -1  16  -3  117.01    3.77
   1  17  -4    5.78    1.09
  -1  17  -3   40.10    2.34
   1  18  -4    5.66    1.09
  -1  18  -3   44.95    2.56
   1  19  -4   51.76    2.83
  -1  19  -3   -0.11    0.48
   1  20  -4   13.98    1.60
  -1  20  -3    0.43    0.62
   1  21  -4   52.10    3.02
  -1  21  -3    0.11    0.66
   1  22  -4    9.14    1.63
  -1  22  -3   25.27    2.22
   1  23  -4   17.55    1.97
  -1  23  -3    0.24    0.66
   1  24  -4    0.81    0.88
  -1  24  -3   26.61    2.41
   1  25  -4    1.55    1.03
  -1  25  -3    0.17    0.76
   3  24   2    1.44    1.16
   3  24   2    3.07    1.19
   3  23   2    3.96    1.38
   3  23   2    5.90    1.39
   3  22   2    8.64    1.69
   3  22   2    9.24    1.51
   3  21   2    9.37    1.67
   3  21   2    9.78    1.53
   3  20   2   29.65    2.36
   3  20   2   25.89    2.08
  -3  20   5    1.00    0.84
   3  19   2   13.96    1.86
   3  19   2   11.98    1.43
  -3  19   5   31.80    2.27
   3  18   2   28.38    2.22
   3  18   2   25.30    1.93
  -3  18   5   10.26    1.54
   3  17   2    0.41    0.72
   3  17   2    0.34    0.49
  -3  17   5   79.58    3.24
   3  16   2   20.93    1.79
  -3  16   5   32.30    2.07
   3  15   2    5.13    1.12
  -3  15   5   98.53    3.41
  -3  15   5   87.10    2.90
   3  14   2  145.83    4.20
  -3  14   5   29.27    1.88
  -3  14   5   23.42    1.55
   3  13   2   75.88    2.97
  -3  13   5   12.85    1.30
  -3  13   5   12.16    1.17
   3  12   2  154.66    4.09
  -3  12   5    3.91    0.85
  -3  12   5    2.18    0.63
   3  11   2   21.48    1.56
  -3  11   5   64.08    2.48
  -3  11   5   54.67    2.01
   3  10   2   33.27    1.85
  -3  10   5   42.06    1.99
  -3  10   5   32.51    1.52
   3   9   2   15.81    1.28
  -3   9   5  213.71    4.23
  -3   9   5  160.54    3.10
   3   8   2   14.59    1.22
  -3   8   5   19.26    1.32
  -3   8   5   12.04    0.98
   3   7   2   99.29    2.81
  -3   7   5  186.61    3.77
  -3   7   5  125.58    2.57
   3   6   2   47.84    1.93
  -3   6   5    0.96    0.52
  -3   6   5    1.77    0.51
   3   5   2  207.54    3.78
  -3   5   5   12.08    1.03
  -3   5   5    7.98    0.82
   3   4   2  305.05    4.42
  -3   4   5   13.69    1.04
  -3   4   5   10.58    0.82
   3  -4  -5    9.61    0.85
  -3  -4  -2  286.47    4.26
   3   3   2  495.04    5.44
  -3   3   5   99.48    2.55
  -3   3   5   78.18    1.88
   3  -3  -5   55.28    1.42
  -3  -3  -2  449.17    5.27
   3   2   2   58.31    1.83
  -3   2   5   14.69    1.04
  -3   2   5   11.55    0.81
   3  -2  -5    7.99    0.70
  -3  -2  -2   45.30    1.70
  -3  -2  -2   38.42    1.31
   3   1   2    1.86    0.47
  -3   1   5  836.82    7.18
  -3   1   5  760.53    5.87
   3  -1  -5  609.99    4.35
  -3  -1  -2    0.79    0.45
  -3  -1  -2    1.27    0.48
   3   0   2    0.49    0.33
  -3   0   5    2.28    0.56
   3   0  -5    1.02    0.36
  -3   0  -2    0.40    0.42
  -3   0  -2    0.18    0.38
   3  -1   2    1.96    0.46
   3  -1   2    1.44    0.37
  -3  -1   5  823.73    7.06
   3   1  -5  767.11    5.14
  -3   1  -2    0.83    0.50
  -3   1  -2    1.39    0.43
   3  -2   2   61.13    1.64
   3  -2   2   57.68    1.61
  -3  -2   5   13.59    1.00
  -3   2  -2   44.26    1.75
  -3   2  -2   49.96    1.29
  -3  -3   5   92.35    2.39
  -3   3  -2  528.33    4.76
  -3   3  -2  365.43    4.87
  -3   3  -2  457.54    3.91
  -3  -4   5   14.93    1.04
  -3   4  -2  325.04    3.67
  -3   4  -2  233.52    3.98
  -3   5  -2  214.15    2.94
   3   6  -5    0.81    0.50
   3   6  -5    4.26    0.68
  -3   6  -2   50.85    1.48
  -3   6  -2   40.81    1.81
   3   7  -5  180.25    3.55
   3   7  -5  175.42    3.47
  -3   7  -2  102.51    2.07
  -3   7  -2   89.92    2.69
   3   8  -5   17.12    1.19
   3   8  -5   16.21    1.13
  -3   8  -2   15.98    0.90
  -3   8  -2   13.16    1.17
   3   9  -5  197.65    3.88
  -3   9  -2   16.49    0.94
  -3   9  -2   15.50    1.27
   3  10  -5   39.15    1.82
  -3  10  -2   32.90    1.30
  -3  10  -2   29.29    1.73
   3  11  -5   61.83    2.31
  -3  11  -2   21.37    1.57
   3  12  -5    4.66    0.88
   3  12  -5    3.20    0.77
  -3  12  -2  151.64    4.03
   3  13  -5   11.66    1.24
   3  13  -5   10.73    1.20
  -3  13  -2   70.22    2.85
   3  14  -5   26.15    1.72
   3  14  -5   25.93    1.83
  -3  14  -2  147.65    4.21
   3  15  -5   98.31    3.24
   3  15  -5   87.88    3.41
  -3  15  -2    5.09    1.08
   3  16  -5   33.66    2.02
   3  16  -5   27.92    2.03
  -3  16  -2   23.80    1.89
   3  17  -5   75.94    3.01
   3  17  -5   63.09    3.08
  -3  17  -2    0.14    0.56
   3  18  -5    6.23    1.24
  -3  18  -2   25.98    2.08
   3  19  -5   28.44    2.24
  -3  19  -2   12.92    1.58
   3  20  -5    0.44    0.65
  -3  20  -2   27.97    2.26
   3  21  -5    3.58    1.12
  -3  21  -2    9.28    1.60
   3  22  -5    0.62    0.74
  -3  22  -2    9.55    1.63
   3  23  -5   14.66    2.03
  -3  23  -2    6.26    1.49
   3  24  -5    1.15    0.94
  -3  24  -2    2.13    1.18
   5  22   1    0.49    0.73
   5  21   1    0.99    1.11
   5  21   1    1.11    0.80
   5  20   1    0.87    1.02
   5  20   1   -0.01    0.62
   5  19   1    8.58    1.66
   5  18   1    0.52    0.87
  -5  18   6   20.53    2.09
   5  17   1   52.94    3.11
  -5  17   6    2.49    1.10
   5  16   1   -0.01    0.74
  -5  16   6   23.35    2.07
   5  15   1  105.17    4.13
  -5  15   6   12.39    1.69
   5  14   1   11.93    1.71
  -5  14   6   57.21    2.89
   5  13   1   13.19    1.56
  -5  13   6   23.35    1.92
   5  12   1   16.11    1.68
  -5  12   6  200.05    5.04
  -5  12   6  135.53    3.80
   5  11   1   55.20    2.79
  -5  11   6    2.08    0.83
  -5  11   6    1.12    0.80
   5  10   1    5.69    1.15
  -5  10   6  101.04    3.55
  -5  10   6   64.91    2.60
   5   9   1  149.37    4.28
  -5   9   6    0.39    0.59
  -5   9   6    0.76    0.70
   5   8   1    0.62    0.66
  -5   8   6    1.37    0.69
  -5   8   6    1.61    0.76
   5   7   1  153.11    4.15
  -5   7   6    2.28    0.74
  -5   7   6    2.07    0.77
   5   6   1    2.76    0.83
  -5   6   6   76.52    2.87
  -5   6   6   58.34    2.30
   5   5   1   62.81    2.58
  -5   5   6   24.43    1.66
  -5   5   6   20.09    1.48
   5   4   1    3.09    0.82
  -5   4   6  186.92    4.36
  -5   4   6  152.59    3.57
  -5  -4  -1    2.90    0.88
   5   3   1   38.94    1.97
  -5   3   6   24.01    1.63
  -5   3   6   20.73    1.46
  -5  -3  -1   36.54    2.03
   5   2   1   18.80    1.39
  -5   2   6   76.00    2.78
  -5   2   6   64.20    2.36
  -5  -2  -1   14.54    1.41
   5   1   1  115.07    3.20
   5   1   1  115.35    3.19
  -5   1   6    0.23    0.43
  -5   1   6    0.66    0.56
  -5  -1  -1   96.23    3.16
   5   0   1    9.96    1.07
   5   0   1    9.84    1.03
  -5   0   6   -0.03    0.39
  -5   0  -1    6.90    1.12
   5  -1   1  114.19    3.09
   5  -1   1  114.84    3.11
  -5  -1   6    1.26    0.60
  -5   1  -1   87.88    3.03
   5  -2   1   15.48    1.21
   5  -2   1   17.42    1.26
  -5  -2   6   79.45    2.83
  -5   2  -1   12.09    1.37
   5  -3   1   39.58    1.82
   5  -3   1   39.42    1.83
  -5  -3   6   24.59    1.64
  -5   3  -1   29.92    1.98
  -5  -4   6  186.07    4.35
  -5   4  -1    4.26    0.81
  -5   4  -1    4.08    1.02
  -5  -5   6   24.81    1.67
  -5   5  -1   67.56    2.34
  -5   5  -1   45.84    2.38
   5   6  -6   77.37    2.92
   5   6  -6   74.62    2.85
  -5   6  -1    2.35    0.70
  -5   6  -1    2.09    0.92
   5   7  -6    2.23    0.78
   5   7  -6    3.22    0.83
  -5   7  -1  158.87    3.51
  -5   7  -1  112.70    3.63
   5   8  -6    1.88    0.82
   5   8  -6    1.65    0.69
  -5   8  -1    0.69    0.56
  -5   8  -1    0.39    0.77
   5   9  -6    0.46    0.61
   5   9  -6    0.77    0.53
  -5   9  -1  102.42    3.58
   5  10  -6   91.60    3.36
  -5  10  -1    5.20    1.18
   5  11  -6    2.65    0.93
  -5  11  -1   44.47    2.52
   5  12  -6  180.61    4.82
  -5  12  -1    8.99    1.39
   5  13  -6   20.19    1.76
  -5  13  -1    6.29    1.21
   5  14  -6   57.28    2.90
  -5  14  -1    9.82    1.53
   5  15  -6   11.52    1.63
  -5  15  -1   84.25    3.68
   5  16  -6   21.19    1.96
  -5  16  -1   -0.15    0.71
   5  17  -6    2.11    1.02
   5  17  -6    1.83    0.84
  -5  17  -1   46.07    2.88
   5  18  -6   20.38    2.05
   5  18  -6   14.90    1.78
  -5  18  -1   -0.59    0.62
   5  19  -6   10.99    1.75
  -5  19  -1    5.13    1.35
   5  20  -6   18.67    2.06
  -5  20  -1   -0.41    0.72
   5  21  -6    2.33    1.06
  -5  21  -1    1.81    1.15
   5  22  -6   16.36    2.23
  -5  22  -1    0.04    0.93
   7  16   0    0.97    1.02
   7  15   0    3.21    1.30
  -7  15   7   21.59    2.16
   7  14   0    8.44    1.74
  -7  14   7   12.37    1.89
   7  13   0   13.16    1.95
  -7  13   7    2.05    1.06
   7  12   0   15.09    2.05
  -7  12   7    1.72    0.99
   7  11   0   16.51    1.90
  -7  11   7    8.67    1.51
   7  10   0    9.73    1.68
  -7  10   7   28.90    2.25
   7   9   0    2.00    1.01
  -7   9   7   32.56    2.36
   7   8   0    4.38    1.26
  -7   8   7   60.69    3.11
  -7   8   7   46.12    2.57
   7   7   0   30.59    2.28
  -7   7   7   15.88    1.70
  -7   7   7   13.22    1.53
   7   6   0   15.46    1.69
  -7   6   7   21.43    1.90
  -7   6   7   16.28    1.63
   7   5   0   40.51    2.52
  -7   5   7   -0.18    0.55
  -7   5   7    0.39    0.59
   7   4   0   93.47    3.69
  -7   4   7    2.27    0.89
  -7   4   7    1.68    0.79
   7   3   0   39.21    2.44
  -7   3   7   10.84    1.57
  -7   3   7    7.63    1.26
  -7  -3   0   31.43    2.32
   7   2   0  105.68    3.81
  -7   2   7  101.75    3.87
  -7   2   7   87.82    3.38
  -7  -2   0   95.75    3.82
   7   1   0    9.04    1.47
   7   1   0    8.97    1.35
  -7   1   7    1.44    0.82
  -7  -1   0    6.23    1.38
   7   0   0   -0.38    0.69
   7   0   0    0.07    0.62
  -7   0   7   84.20    3.52
  -7   0   0    0.98    0.84
   7  -1   0    7.07    1.33
   7  -1   0    7.91    1.27
  -7  -1   7    1.28    0.81
  -7   1   0    7.52    1.44
   7  -2   0  110.06    3.76
   7  -2   0  107.58    3.71
  -7  -2   7  104.87    3.94
  -7   2   0   84.15    3.60
   7  -3   0   42.51    2.43
   7  -3   0   38.64    2.29
  -7  -3   7    9.55    1.51
  -7   3   0   30.83    2.33
   7  -4   0   96.60    3.47
   7  -4   0   90.49    3.37
   7   4  -7    1.25    0.78
  -7   4   0   71.68    3.38
   7  -5   0   40.65    2.33
   7  -5   0   38.99    2.28
   7   5  -7    0.37    0.72
   7   5  -7   -0.02    0.58
  -7   5   0   29.40    2.29
   7   6  -7   21.02    1.95
   7   6  -7   21.49    1.92
  -7   6   0   17.14    1.59
  -7   6   0   10.51    1.64
   7   7  -7   17.26    1.81
   7   7  -7   16.15    1.71
  -7   7   0   23.56    2.14
   7   8  -7   61.83    3.22
   7   8  -7   57.39    3.08
  -7   8   0    2.13    1.11
   7   9  -7   31.86    2.41
  -7   9   0    1.26    1.03
   7  10  -7   26.87    2.25
  -7  10   0    5.59    1.42
   7  11  -7    4.33    1.26
  -7  11   0   11.87    1.84
   7  12  -7    0.70    0.90
  -7  12   0    7.69    1.61
   7  13  -7    3.35    1.23
  -7  13   0    7.97    1.67
   7  14  -7   11.60    1.89
  -7  14   0    6.24    1.58
   7  15  -7   21.82    2.31
  -7  15   0    0.94    1.12
   7  16  -7   38.11    2.92
  -7  16   0    0.00    0.98
   7  17  -7   13.24    2.13
  -7  17   0    2.25    1.35
  -9   7   8   13.21    2.03
   9   6  -1    8.38    1.75
  -9   6   8    5.01    1.44
   9   5  -1    0.41    0.95
  -9   5   8   64.82    3.71
   9   4  -1    0.59    1.02
  -9   4   8    2.86    1.23
   9   3  -1    1.46    1.07
  -9   3   8   63.50    3.65
  -9   2   8    2.12    1.12
  -9   1   8   12.24    1.97
  -9   0   8    0.33    0.86
  -9   0   1   34.05    2.74
   9  -1  -1    1.88    1.12
  -9  -1   8    8.95    1.72
   9   1  -8    8.84    1.86
   9   1  -8    9.03    1.69
  -9   1   1    4.99    1.49
   9  -2  -1   27.16    2.35
   9   2  -8    3.54    1.39
   9   2  -8    3.87    1.33
  -9   2   1   22.56    2.32
   9  -3  -1    1.37    0.93
   9   3  -8   71.55    3.90
  -9   3   1    3.72    1.40
   9   4  -8    2.05    1.34
   9   4  -8    3.44    1.33
  -9   4   1    0.24    0.91
   9   5  -8   59.11    3.61
  -9   5   1    0.06    0.89
  -9   6   1    6.35    1.61
  -9   7   1    0.69    1.04
  -9   8   1   23.79    2.46
  -9   9   1    0.48    1.08
   0  24   4   55.80    3.31
   0  23   4    0.63    0.93
   0  22   4    5.26    1.31
   0  21   4    1.64    0.97
   0  20   4   33.14    2.31
   0  19   4    0.64    0.72
   0  19   4   -0.10    0.46
   0  18   4  178.46    4.82
   0  18   4  162.14    4.19
   0  17   4    5.82    1.15
   0  17   4    5.06    0.94
   0  16   4  167.12    4.39
   0  16   4  156.73    3.79
   0  15   4   11.71    1.27
   0  15   4   11.22    1.08
   0  14   4  157.59    4.00
   0  14   4  140.99    3.30
   0  13   4   10.91    1.18
   0  13   4   10.92    0.96
   0  12   4   11.68    1.14
   0  12   4   11.26    0.91
   0  11   4   -0.07    0.36
   0  11   4   -0.06    0.22
   0  10   4  211.52    3.99
   0  10   4  196.45    3.11
   0   9   4  197.82    3.70
   0   9   4  182.97    2.81
   0   8   4 1029.85    8.12
   0   8   4  987.47    6.22
   0   7   4   27.01    1.29
   0   7   4   27.01    0.93
   0   6   4  178.04    3.05
   0   6   4  184.97    2.17
   0   5   4  239.26    3.37
   0  -5  -4  157.58    2.81
   0   4   4   58.30    1.58
   0  -4  -4   34.61    1.40
   0   3   4   66.60    1.58
   0  -3  -4   38.59    1.34
   0   2   4  203.41    2.57
   0  -2  -4  119.96    2.13
   0   1   4   58.37    1.28
   0  -1  -4   40.27    1.24
   0   0   4  582.68    3.95
   0   0  -4  432.03    3.87
   0   1  -4   47.42    1.30
   0  -2   4  188.22    1.80
   0   2  -4  204.98    2.36
   0   3  -4   65.56    1.46
   0   4  -4   60.33    1.52
   0   5  -4  253.29    2.17
   0   5  -4  236.63    3.23
   0   6  -4  204.60    1.95
   0   6  -4  189.92    3.08
   0   7  -4   28.89    1.30
   0   8  -4 1085.88    5.84
   0   8  -4  981.24    7.89
   0   9  -4  202.33    2.44
   0   9  -4  181.57    3.55
   0  10  -4  221.04    2.74
   0  11  -4   -0.02    0.25
   0  11  -4    0.40    0.36
   0  12  -4   11.45    0.84
   0  12  -4   10.56    1.05
   0  13  -4   12.19    0.91
   0  13  -4   11.71    1.16
   0  14  -4  137.80    3.83
   0  15  -4    9.14    1.13
   0  16  -4  154.37    4.35
   0  17  -4    3.69    0.96
   0  18  -4  162.66    4.77
   0  19  -4    0.30    0.57
   0  20  -4   26.08    2.13
   0  21  -4    2.94    1.03
   0  22  -4    3.31    1.16
   0  23  -4   -0.08    0.64
   0  24  -4   49.37    3.22
   0  25  -4    5.25    1.45
   2  25   3    0.16    1.03
   2  24   3   -0.32    0.88
   2  23   3   13.42    1.96
   2  22   3   -0.09    0.83
   2  22   3    0.26    0.64
  -2  22   5   36.82    2.60
   2  21   3   60.35    3.25
   2  21   3   52.83    2.85
  -2  21   5    9.50    1.59
   2  20   3    2.15    0.96
   2  20   3    2.32    0.87
  -2  20   5   58.46    3.02
   2  19   3   33.66    2.36
   2  19   3   27.75    1.98
  -2  19   5   24.38    1.99
   2  18   3   17.93    1.77
   2  18   3   15.07    1.46
  -2  18   5   21.16    1.85
   2  17   3    4.80    1.12
   2  17   3    4.31    0.92
  -2  17   5    3.27    0.97
   2  16   3   -0.38    0.61
   2  16   3    0.02    0.39
  -2  16   5   -0.09    0.57
   2  15   3   22.48    1.74
   2  15   3   20.59    1.50
  -2  15   5   22.50    1.71
  -2  15   5   19.75    1.39
   2  14   3    3.07    0.89
   2  14   3    3.53    0.74
  -2  14   5    6.11    1.08
  -2  14   5    7.70    0.92
   2  13   3  274.35    5.35
  -2  13   5  153.16    3.90
  -2  13   5  143.99    3.19
   2  12   3   58.59    2.46
  -2  12   5   85.01    2.85
  -2  12   5   83.98    2.34
   2  11   3  297.78    5.23
  -2  11   5  211.59    4.30
  -2  11   5  202.91    3.43
   2  10   3   24.66    1.51
  -2  10   5  100.58    2.89
  -2  10   5   95.91    2.25
   2   9   3  203.87    4.02
  -2   9   5  215.84    4.08
  -2   9   5  194.72    3.01
   2   8   3   14.49    1.12
  -2   8   5  116.78    2.93
  -2   8   5  108.91    2.14
   2   7   3  139.58    3.10
  -2   7   5   29.62    1.47
  -2   7   5   27.75    1.05
  -2   6   5  407.75    5.07
  -2   6   5  304.89    3.14
   2   5   3  215.91    3.53
  -2   5   5  136.76    2.85
  -2   5   5   96.59    1.69
   2  -5  -5   93.65    2.12
   2   4   3  325.36    4.14
  -2   4   5  457.66    5.05
  -2   4   5  316.76    2.92
   2  -4  -5  279.16    3.39
  -2  -4  -3  256.10    3.49
   2   3   3  112.89    2.33
  -2   3   5   14.35    0.94
   2  -3  -5    8.96    0.79
  -2  -3  -3   92.72    2.07
  -2  -3  -3   70.64    1.83
   2   2   3   74.62    1.81
  -2   2   5  503.71    5.04
   2  -2  -5  328.13    3.41
  -2  -2  -3   48.05    1.49
  -2  -2  -3   44.81    1.43
   2   1   3    1.69    0.36
  -2   1   5   17.35    0.98
   2  -1  -5   15.08    0.81
  -2  -1  -3    1.05    0.41
  -2  -1  -3    1.31    0.46
   2   0   3    0.29    0.23
  -2   0   5    0.32    0.27
   2   0  -5    0.12    0.25
  -2   0  -3    0.38    0.36
  -2   0  -3    0.06    0.34
   2  -1   3    1.42    0.31
  -2  -1   5   17.18    0.92
   2   1  -5   16.20    0.82
  -2   1  -3    0.98    0.43
  -2   1  -3    0.86    0.36
   2  -2   3   70.70    1.38
  -2  -2   5  482.65    4.65
  -2   2  -3   55.19    1.67
  -2   2  -3   64.69    1.53
   2  -3   3  106.95    1.59
   2  -3   3  107.66    1.62
  -2  -3   5   12.50    0.82
  -2   3  -3   91.42    2.19
  -2   3  -3  103.60    1.99
   2  -4   3  338.33    2.81
   2  -4   3  360.56    2.97
  -2  -4   5  440.07    4.47
  -2   4  -3  349.80    4.39
  -2  -5   5  132.61    2.48
  -2   5  -3  242.92    2.36
  -2   5  -3  224.95    3.65
   2   6  -5  385.16    4.39
   2   6  -5  372.02    4.27
  -2   6  -3  131.38    1.71
  -2   6  -3  122.02    2.79
   2   7  -5   30.15    1.30
   2   7  -5   28.04    1.22
  -2   7  -3  152.21    1.89
  -2   7  -3  137.89    3.08
   2   8  -5  117.24    2.56
   2   8  -5  105.57    2.76
  -2   8  -3   18.82    0.76
  -2   8  -3   18.06    1.25
   2   9  -5  212.39    3.52
   2   9  -5  188.63    3.84
  -2   9  -3  232.27    2.58
  -2   9  -3  212.78    4.12
   2  10  -5   98.41    2.49
   2  10  -5   96.36    2.87
  -2  10  -3   27.27    1.01
  -2  10  -3   25.21    1.53
   2  11  -5  208.77    3.73
   2  11  -5  191.52    4.19
  -2  11  -3  281.82    5.08
   2  12  -5   87.96    2.53
   2  12  -5   77.70    2.79
  -2  12  -3   53.60    2.35
   2  13  -5  152.41    3.41
   2  13  -5  128.37    3.70
  -2  13  -3  273.45    5.36
   2  14  -5    5.60    0.90
   2  14  -5    6.21    1.06
  -2  14  -3    4.60    0.93
   2  15  -5   21.80    1.50
   2  15  -5   18.38    1.58
  -2  15  -3   18.65    1.59
   2  16  -5    0.12    0.49
  -2  16  -3    0.08    0.44
   2  17  -5    2.72    0.87
  -2  17  -3    3.07    0.94
   2  18  -5   21.15    1.85
  -2  18  -3   13.87    1.54
   2  19  -5   21.41    1.92
  -2  19  -3   27.56    2.15
   2  20  -5   54.22    3.06
  -2  20  -3    1.90    0.91
   2  21  -5    6.23    1.36
  -2  21  -3   52.23    3.06
   2  22  -5   30.04    2.46
  -2  22  -3    0.89    0.80
   2  23  -5    7.05    1.52
  -2  23  -3   15.23    1.88
   2  24  -5    5.04    1.41
  -2  24  -3    0.75    0.78
   2  25  -5    0.74    0.90
  -2  25  -3    0.82    0.82
   4  23   2   15.42    2.04
   4  22   2    1.97    1.17
   4  22   2    1.68    0.94
   4  21   2    0.21    0.91
   4  21   2   -0.16    0.60
   4  20   2    0.07    0.86
   4  20   2    0.14    0.60
  -4  20   6    0.18    0.81
   4  19   2   27.85    2.37
  -4  19   6   14.76    1.74
   4  18   2   -0.20    0.68
  -4  18   6    0.06    0.70
   4  17   2   44.88    2.76
  -4  17   6  100.19    3.83
   4  16   2    5.08    1.24
  -4  16   6    9.92    1.52
   4  15   2   60.13    3.01
  -4  15   6   72.33    3.12
   4  14   2    3.34    1.00
  -4  14   6    5.87    1.13
   4  13   2    7.88    1.33
  -4  13   6   11.44    1.34
   4  12   2    4.95    1.07
  -4  12   6    0.89    0.66
  -4  12   6    1.79    0.74
   4  11   2   21.13    1.69
  -4  11   6   48.97    2.39
  -4  11   6   37.29    1.86
   4  10   2    1.45    0.71
  -4  10   6    8.85    1.26
  -4  10   6    7.54    1.04
   4   9   2  144.50    3.92
  -4   9   6  353.38    5.96
  -4   9   6  233.55    4.12
   4   8   2  104.35    3.26
  -4   8   6   17.68    1.44
  -4   8   6   11.74    1.17
   4   7   2  115.42    3.33
  -4   7   6  113.42    3.28
  -4   7   6   76.72    2.33
   4   6   2    5.57    0.94
  -4   6   6    4.59    0.88
  -4   6   6    3.99    0.77
   4   5   2   55.84    2.24
  -4   5   6   21.17    1.46
  -4   5   6   16.19    1.15
   4   4   2    8.25    1.01
  -4   4   6    4.05    0.80
  -4   4   6    2.72    0.66
  -4  -4  -2    7.68    1.07
   4   3   2  379.06    5.38
  -4   3   6   73.09    2.50
  -4   3   6   59.57    1.96
  -4  -3  -2  332.64    5.22
   4   2   2  144.41    3.26
  -4   2   6   65.67    2.35
  -4   2   6   58.36    1.94
   4  -2  -6   39.07    1.25
  -4  -2  -2  118.44    3.13
   4   1   2  161.61    3.35
  -4   1   6  357.27    5.37
  -4   1   6  321.14    4.46
   4  -1  -6  257.16    2.91
  -4  -1  -2  124.29    3.18
  -4  -1  -2  112.72    2.14
   4   0   2  151.85    3.17
  -4   0   6   28.24    1.57
   4   0  -6   21.60    0.95
  -4   0  -2  109.57    3.01
  -4   0  -2   89.84    1.86
   4  -1   2  157.67    3.16
   4  -1   2  156.98    3.17
  -4  -1   6  355.93    5.33
   4   1  -6  317.10    3.41
  -4   1  -2  116.96    3.12
  -4   1  -2  101.49    1.92
   4  -2   2  139.60    2.93
   4  -2   2  136.19    2.90
  -4  -2   6   64.29    2.31
   4   2  -6   61.89    1.61
  -4   2  -2  101.31    2.94
  -4   2  -2   99.89    1.89
   4  -3   2  375.84    4.68
   4  -3   2  372.29    4.71
  -4  -3   6   67.96    2.38
  -4   3  -2  276.10    4.84
  -4   3  -2  309.58    3.30
  -4  -4   6    4.40    0.80
  -4   4  -2    9.21    0.87
  -4   4  -2    4.65    0.90
  -4   4  -2    6.12    0.70
  -4  -5   6   20.88    1.41
  -4   5  -2   53.23    1.80
  -4   5  -2   38.88    1.99
  -4   5  -2   49.83    1.50
  -4  -6   6    5.49    0.94
   4   6  -6    4.32    0.75
  -4   6  -2    4.42    0.69
  -4   6  -2    3.37    0.90
   4   7  -6  101.49    3.03
   4   7  -6  105.89    3.07
  -4   7  -2  112.08    2.53
   4   8  -6   17.49    1.36
   4   8  -6   17.53    1.31
  -4   8  -2  109.15    2.52
  -4   8  -2   80.92    2.91
   4   9  -6  329.34    5.60
   4   9  -6  325.05    5.53
   4  10  -6    8.65    1.17
  -4  10  -2    0.52    0.60
   4  11  -6   45.50    2.24
  -4  11  -2   16.22    1.52
   4  12  -6    1.75    0.72
  -4  12  -2    4.30    0.99
   4  13  -6    8.15    1.26
  -4  13  -2    7.05    1.23
   4  14  -6    6.33    1.15
   4  14  -6    5.01    1.03
  -4  14  -2    1.80    0.81
   4  15  -6   72.53    3.02
   4  15  -6   55.86    2.88
  -4  15  -2   53.73    2.83
   4  16  -6   12.67    1.50
   4  16  -6   10.74    1.49
  -4  16  -2    4.78    1.14
   4  17  -6  106.68    3.82
   4  17  -6   90.98    3.86
  -4  17  -2   38.92    2.55
   4  18  -6   -0.34    0.41
  -4  18  -2   -0.11    0.59
   4  19  -6   13.94    1.71
  -4  19  -2   21.86    2.08
   4  20  -6   -0.45    0.48
  -4  20  -2   -0.10    0.62
   4  21  -6    1.70    0.89
  -4  21  -2    0.15    0.76
   4  22  -6    2.84    1.17
  -4  22  -2    1.80    1.04
   4  23  -6   13.36    2.01
  -4  23  -2   13.87    2.06
   6  18   1    4.68    1.49
   6  17   1    0.07    0.90
  -6  17   7    1.01    1.00
   6  16   1    4.95    1.41
  -6  16   7   12.63    1.86
   6  15   1    4.18    1.30
  -6  15   7    9.54    1.65
   6  14   1   38.61    2.70
  -6  14   7   18.97    1.88
   6  13   1   11.56    1.78
  -6  13   7   22.48    2.00
   6  12   1  108.38    4.23
  -6  12   7   54.41    2.91
   6  11   1   41.18    2.63
  -6  11   7   38.18    2.42
   6  10   1   31.11    2.28
  -6  10   7   56.12    2.87
   6   9   1    1.06    0.87
  -6   9   7   15.97    1.62
  -6   9   7   12.35    1.41
   6   8   1    1.65    0.92
  -6   8   7    3.55    1.02
  -6   8   7    2.43    0.89
   6   7   1    6.86    1.28
  -6   7   7    1.77    0.81
  -6   7   7    0.86    0.68
   6   6   1   75.27    3.15
  -6   6   7   13.83    1.46
  -6   6   7    9.11    1.27
   6   5   1    1.20    0.77
  -6   5   7   61.22    2.83
  -6   5   7   49.39    2.35
   6   4   1   85.78    3.23
  -6   4   7   94.17    3.47
  -6   4   7   75.19    2.84
  -6  -4  -1   72.91    3.10
   6   3   1    2.27    0.83
  -6   3   7  134.02    4.10
  -6   3   7  118.39    3.51
  -6  -3  -1    1.53    0.92
   6   2   1   11.17    1.25
  -6   2   7   91.03    3.38
  -6   2   7   81.24    2.95
  -6  -2  -1   10.76    1.51
   6   1   1    0.53    0.60
  -6   1   7    4.46    1.01
  -6  -1  -1    0.81    0.79
   6   0   1   -0.08    0.52
   6   0   1   -0.08    0.44
  -6   0   7   -0.12    0.47
  -6   0  -1   -0.25    0.66
   6  -1   1   -0.16    0.54
   6  -1   1    0.39    0.48
  -6  -1   7    6.04    1.13
  -6   1  -1   -0.29    0.67
   6  -2   1   11.60    1.25
   6  -2   1   10.80    1.15
  -6  -2   7   93.98    3.43
  -6   2  -1    9.31    1.39
   6  -3   1    3.28    0.87
   6  -3   1    1.65    0.64
  -6  -3   7  131.36    4.05
  -6   3  -1    1.79    0.90
   6  -4   1   85.98    2.93
   6  -4   1   84.24    2.91
  -6  -4   7   86.56    3.34
  -6   4  -1   56.47    2.80
   6  -5   1   -0.38    0.54
   6  -5   1   -0.09    0.45
  -6  -5   7   55.47    2.71
  -6   5  -1    0.88    0.87
   6   6  -7   12.56    1.43
   6   6  -7   11.73    1.35
  -6   6  -1   74.98    2.74
  -6   6  -1   53.08    2.81
   6   7  -7    0.56    0.65
   6   7  -7    0.74    0.67
  -6   7  -1    5.87    1.32
   6   8  -7    3.84    1.06
   6   8  -7    3.63    0.96
  -6   8  -1    0.70    0.89
   6   9  -7   17.51    1.73
   6   9  -7   15.47    1.58
  -6   9  -1    1.70    1.00
   6  10  -7   56.62    2.92
  -6  10  -1   21.94    2.03
   6  11  -7   35.89    2.41
  -6  11  -1   26.58    2.22
   6  12  -7   50.83    2.86
  -6  12  -1   80.61    3.66
   6  13  -7   20.32    1.94
  -6  13  -1    8.31    1.53
   6  14  -7   17.39    1.86
  -6  14  -1   28.07    2.36
   6  15  -7    9.15    1.69
  -6  15  -1    1.64    1.07
   6  16  -7    8.58    1.63
  -6  16  -1    2.38    1.21
   6  17  -7    0.75    0.92
  -6  17  -1    0.04    0.92
   6  18  -7   16.27    1.98
  -6  18  -1    3.89    1.37
   6  19  -7   10.54    1.76
  -6  19  -1    1.44    1.18
   6  20  -7    8.28    1.67
  -6  20  -1   32.90    2.86
  -8  14   8   14.13    2.10
  -8  13   8    0.64    0.97
   8  12   0    2.76    1.32
  -8  12   8    1.61    1.06
   8  11   0    0.71    1.00
  -8  11   8    0.00    0.84
   8  10   0   17.53    2.09
  -8  10   8   49.04    3.13
   8   9   0   15.33    2.14
  -8   9   8    5.90    1.49
   8   8   0   39.00    2.83
  -8   8   8   85.34    3.99
   8   7   0    8.44    1.64
  -8   7   8    0.05    0.73
   8   6   0   23.45    2.17
  -8   6   8   21.99    2.12
   8   5   0    0.20    0.83
  -8   5   8    1.23    0.96
  -8   5   8    2.64    1.04
   8   4   0    6.81    1.45
  -8   4   8    0.20    0.77
  -8   4   8    1.62    0.83
   8   3   0    9.98    1.66
  -8   3   8    1.79    0.97
   8   2   0   20.05    1.96
  -8   2   8   24.16    2.15
  -8  -2   0   16.95    1.90
   8   1   0   17.87    1.85
  -8   1   8    0.12    0.65
  -8  -1   0   12.21    1.84
  -8   0   8   40.48    2.73
  -8   0   0   15.36    1.88
   8  -1   0   18.27    1.82
  -8  -1   8    0.07    0.73
  -8   1   0   13.39    1.88
   8  -2   0   20.40    1.88
  -8  -2   8   23.61    2.14
  -8   2   0   17.13    1.95
   8  -3   0   13.38    1.57
  -8  -3   8    0.38    0.76
   8   3  -8    0.43    0.76
  -8   3   0    9.00    1.68
   8  -4   0    5.70    1.19
   8   4  -8    1.05    0.94
   8   4  -8    2.30    1.02
  -8   4   0    4.15    1.33
   8   5  -8    1.96    1.08
   8   5  -8    1.67    0.99
  -8   5   0    0.33    0.86
   8   6  -8   23.34    2.26
   8   6  -8   22.50    2.13
  -8   6   0   18.90    2.07
   8   7  -8    0.17    0.87
   8   7  -8   -0.06    0.79
  -8   7   0    5.51    1.47
   8   8  -8   81.30    3.99
   8   8  -8   78.29    3.90
  -8   8   0   26.19    2.39
   8   9  -8    4.41    1.37
  -8   9   0    8.84    1.73
   8  10  -8   42.35    3.03
  -8  10   0   12.06    1.98
   8  11  -8    0.36    0.87
  -8  11   0   -0.19    0.91
   8  12  -8    1.82    1.20
  -8  12   0    1.16    1.17
  -8  13   0    1.39    1.29
  -8  14   0    6.25    1.74
   1  25   4   -0.77    0.83
   1  24   4   -0.22    0.85
   1  23   4   22.31    2.22
  -1  23   5    4.36    1.31
   1  22   4    2.16    1.11
  -1  22   5   -0.83    0.69
   1  21   4   35.79    2.53
  -1  21   5   -0.14    0.75
   1  20   4   -0.10    0.74
  -1  20   5    0.97    0.87
   1  19   4   89.62    3.65
   1  19   4   86.33    3.24
  -1  19   5    5.91    1.29
   1  18   4    0.83    0.72
   1  18   4    1.01    0.61
  -1  18   5   47.32    2.60
   1  17   4   22.19    1.84
   1  17   4   21.13    1.57
  -1  17   5   58.49    2.78
   1  16   4    0.19    0.65
   1  16   4    0.91    0.54
  -1  16   5   76.44    3.07
  -1  16   5   71.37    2.54
   1  15   4   53.20    2.52
   1  15   4   52.94    2.20
  -1  15   5    7.50    1.19
  -1  15   5    8.17    0.94
   1  14   4    0.28    0.57
   1  14   4    0.16    0.37
  -1  14   5   33.14    1.94
  -1  14   5   36.09    1.67
   1  13   4  365.96    6.05
   1  13   4  341.77    5.06
  -1  13   5    8.19    1.14
  -1  13   5    6.65    0.78
   1  12   4   18.46    1.45
   1  12   4   15.74    1.11
  -1  12   5    4.02    0.87
  -1  12   5    3.88    0.63
   1  11   4   90.52    2.84
   1  11   4   82.39    2.28
  -1  11   5   25.97    1.57
  -1  11   5   24.68    1.18
   1  10   4    4.56    0.79
  -1  10   5   69.08    2.38
  -1  10   5   62.24    1.70
   1   9   4   83.13    2.52
  -1   9   5  307.01    4.77
  -1   9   5  296.85    3.41
   1   8   4   43.09    1.76
  -1   8   5  573.31    6.27
  -1   8   5  550.99    4.32
   1   7   4    4.29    0.67
  -1   7   5   55.74    1.92
  -1   7   5   49.23    1.15
   1   6   4   75.08    2.10
  -1   6   5   63.65    1.95
   1  -6  -5   45.58    1.69
   1   5   4  297.34    3.94
  -1   5   5  170.04    3.03
   1  -5  -5  104.00    2.36
  -1  -5  -4  211.36    3.38
   1   4   4    5.25    0.60
  -1   4   5   75.30    1.94
   1  -4  -5   43.52    1.52
  -1  -4  -4    3.09    0.73
   1   3   4  963.01    6.47
  -1   3   5    0.49    0.27
   1  -3  -5    0.62    0.48
  -1  -3  -4  919.51    5.42
  -1  -3  -4  688.75    5.59
   1   2   4  205.39    2.75
  -1   2   5  322.51    3.65
   1  -2  -5  213.29    2.93
  -1  -2  -4  160.86    2.14
   1   1   4  238.02    2.74
  -1   1   5  276.79    3.22
   1  -1  -5  211.24    2.86
  -1  -1  -4  157.00    2.14
  -1  -1  -4  151.41    2.47
   1   0   4    2.43    0.35
  -1   0   5  767.95    5.28
   1   0  -5  631.32    4.97
  -1   0  -4    0.62    0.29
  -1   0  -4    0.60    0.37
   1  -1   4  228.16    2.26
  -1  -1   5  275.62    2.99
   1   1  -5  244.48    3.10
  -1   1  -4  180.54    2.65
  -1  -2   5  307.64    3.08
   1   2  -5  319.74    3.11
  -1   2  -4  205.42    2.77
  -1   2  -4  184.30    2.73
  -1  -3   5    0.19    0.20
   1   3  -5    0.23    0.17
  -1   3  -4 1201.05    7.22
  -1  -4   5   71.81    1.45
   1   4  -5   72.99    1.74
  -1   4  -4    5.85    0.58
  -1  -5   5  163.44    2.22
   1   5  -5  167.30    2.82
  -1   5  -4  339.39    4.16
   1   6  -5   67.20    1.50
   1   6  -5   61.92    1.83
   1   6  -5   56.35    1.34
  -1   6  -4   75.96    2.08
   1   7  -5   51.58    1.36
   1   7  -5   49.12    1.73
  -1   7  -4    6.31    0.72
   1   8  -5  565.16    4.70
   1   8  -5  535.82    5.98
  -1   8  -4   41.32    1.71
   1   9  -5  314.98    3.63
   1   9  -5  285.42    4.57
  -1   9  -4   87.69    2.58
   1  10  -5   65.65    1.76
   1  10  -5   59.68    2.20
  -1  10  -4    4.09    0.46
  -1  10  -4    4.37    0.76
   1  11  -5   23.99    1.17
   1  11  -5   22.84    1.45
  -1  11  -4   84.09    2.74
   1  12  -5    2.91    0.60
   1  12  -5    3.81    0.79
  -1  12  -4   15.03    1.29
   1  13  -5    7.48    0.83
   1  13  -5    5.69    0.91
  -1  13  -4  362.04    6.07
   1  14  -5   30.96    1.89
  -1  14  -4   -0.07    0.42
   1  15  -5    6.56    1.06
  -1  15  -4   52.96    2.54
  -1  16  -4    0.43    0.56
   1  17  -5   49.16    2.62
  -1  17  -4   23.47    1.87
   1  18  -5   43.45    2.55
  -1  18  -4   -0.20    0.48
   1  19  -5    3.92    1.04
  -1  19  -4   83.94    3.61
   1  20  -5    1.63    0.89
  -1  20  -4    0.06    0.55
   1  21  -5    0.18    0.63
  -1  21  -4   32.71    2.46
   1  22  -5   -0.14    0.63
  -1  22  -4    2.23    1.01
   1  23  -5    4.81    1.33
  -1  23  -4   16.32    1.93
   1  24  -5   25.87    2.45
  -1  24  -4    0.54    0.82
   1  25  -5    6.27    1.54
  -1  25  -4    0.52    0.81
   3  23   3   11.74    1.96
   3  22   3    4.70    1.45
   3  22   3    7.46    1.44
   3  21   3    7.03    1.56
   3  21   3    6.28    1.27
  -3  21   6    0.51    0.89
   3  20   3   -0.21    0.70
   3  20   3    0.39    0.59
  -3  20   6   43.02    2.71
   3  19   3   19.53    1.96
   3  19   3   15.56    1.60
  -3  19   6   11.13    1.66
   3  18   3   34.64    2.44
   3  18   3   31.27    2.12
  -3  18   6   13.42    1.61
   3  17   3   38.74    2.48
   3  17   3   37.41    2.23
  -3  17   6    1.18    0.86
   3  16   3   92.77    3.65
  -3  16   6   -0.13    0.59
   3  15   3   16.84    1.64
  -3  15   6    0.53    0.60
   3  14   3    1.28    0.73
  -3  14   6  125.65    3.85
   3  13   3   14.45    1.41
  -3  13   6    7.18    1.15
   3  12   3   37.25    2.11
  -3  12   6  256.96    5.18
  -3  12   6  227.37    4.00
   3  11   3   17.48    1.45
  -3  11   6    2.57    0.73
  -3  11   6    1.63    0.55
   3  10   3   48.52    2.23
  -3  10   6  109.21    3.24
  -3  10   6   85.11    2.30
   3   9   3  106.40    3.17
  -3   9   6    3.24    0.78
  -3   9   6    2.86    0.63
   3   8   3   73.60    2.58
  -3   8   6   71.46    2.50
  -3   8   6   48.93    1.67
   3   7   3   42.68    1.91
  -3   7   6   60.44    2.26
  -3   7   6   40.24    1.48
   3   6   3   66.28    2.29
  -3   6   6  141.53    3.34
  -3   6   6   93.05    2.07
   3   5   3   23.57    1.40
  -3   5   6    1.91    0.60
  -3   5   6    1.29    0.43
   3  -5  -6    1.86    0.67
   3   4   3   28.94    1.47
  -3   4   6  565.29    6.38
  -3   4   6  427.47    4.20
   3  -4  -6  340.92    3.86
  -3  -4  -3   27.06    1.41
   3   3   3   60.55    1.98
  -3   3   6  111.52    2.81
  -3   3   6   91.62    1.96
   3  -3  -6   67.58    1.74
  -3  -3  -3   48.03    1.82
  -3  -3  -3   40.53    1.54
   3   2   3   29.00    1.36
  -3   2   6  176.80    3.45
  -3   2   6  154.73    2.54
   3  -2  -6  115.48    2.16
  -3  -2  -3   21.68    1.28
  -3  -2  -3   16.48    1.08
   3   1   3  410.37    4.69
  -3   1   6   11.16    0.96
   3  -1  -6    8.34    0.71
  -3  -1  -3  309.28    4.41
  -3  -1  -3  250.91    3.27
   3   0   3  583.18    5.40
  -3   0   6    1.24    0.47
   3   0  -6    0.17    0.32
  -3   0  -3  420.40    5.15
  -3   0  -3  384.70    3.93
   3  -1   3  402.60    4.31
  -3  -1   6   12.36    0.97
   3   1  -6    9.73    0.72
  -3   1  -3  290.89    4.35
  -3   1  -3  299.90    3.43
   3  -2   3   26.75    1.13
  -3  -2   6  168.18    3.27
   3   2  -6  157.79    2.63
  -3   2  -3   22.73    1.35
  -3   2  -3   24.42    1.07
   3  -3   3   55.92    1.52
   3  -3   3   58.62    1.56
  -3  -3   6  104.51    2.60
  -3   3  -3   43.62    1.81
  -3   3  -3   53.75    1.52
   3  -4   3   28.21    1.09
   3  -4   3   28.07    1.09
  -3  -4   6  542.58    5.90
  -3   4  -3   25.80    1.45
  -3   4  -3   27.56    1.18
  -3  -5   6    1.69    0.52
  -3   5  -3   27.10    1.08
  -3   5  -3   19.60    1.32
  -3  -6   6  129.05    2.95
  -3   6  -3   68.93    1.61
   3   7  -6   56.92    2.04
   3   7  -6   55.66    1.99
  -3   7  -3   45.23    1.31
  -3   7  -3   35.96    1.79
   3   8  -6   69.70    2.29
   3   8  -6   65.74    2.19
  -3   8  -3   79.16    1.74
  -3   8  -3   68.15    2.49
   3   9  -6    2.32    0.64
  -3   9  -3  102.93    3.12
   3  10  -6  104.17    2.90
  -3  10  -3   55.80    2.40
   3  11  -6    2.00    0.65
   3  11  -6    1.34    0.53
  -3  11  -3   16.47    1.42
   3  12  -6  259.80    4.76
   3  12  -6  236.75    5.10
  -3  12  -3   34.82    2.04
   3  13  -6    9.75    1.19
   3  13  -6    6.73    1.08
  -3  13  -3   14.34    1.43
   3  14  -6  125.55    3.50
   3  14  -6  108.24    3.70
  -3  14  -3    3.20    0.92
   3  15  -6    0.60    0.59
   3  15  -6    0.63    0.54
  -3  15  -3   14.18    1.49
   3  16  -6    0.00    0.42
  -3  16  -3   90.59    3.59
   3  17  -6    0.64    0.62
  -3  17  -3   38.73    2.48
   3  18  -6   11.50    1.60
  -3  18  -3   30.61    2.27
   3  19  -6    6.60    1.28
  -3  19  -3   16.52    1.77
   3  20  -6   38.55    2.69
  -3  20  -3   -0.15    0.60
   3  21  -6    0.18    0.56
  -3  21  -3    6.86    1.44
   3  22  -6   12.04    1.81
  -3  22  -3    6.82    1.54
   3  23  -6    1.49    0.96
  -3  23  -3   14.39    2.03
   3  24  -6    1.16    0.93
  -3  24  -3   11.67    1.99
   5  21   2    0.96    0.79
   5  20   2   17.66    2.14
   5  19   2    0.67    0.97
  -5  19   7    9.81    1.79
   5  18   2   12.98    1.94
  -5  18   7    8.99    1.69
   5  17   2   12.45    1.89
  -5  17   7  104.76    4.18
   5  16   2    3.31    1.15
  -5  16   7   32.86    2.44
   5  15   2    0.98    0.90
  -5  15   7   26.35    2.18
   5  14   2   81.98    3.63
  -5  14   7   13.60    1.67
   5  13   2    2.77    1.02
  -5  13   7    0.31    0.69
   5  12   2  141.34    4.51
  -5  12   7    1.88    0.90
   5  11   2   10.87    1.56
  -5  11   7   30.70    2.10
   5  10   2   96.69    3.60
  -5  10   7   14.48    1.52
   5   9   2    4.52    1.09
  -5   9   7  161.91    4.43
   5   8   2    0.50    0.63
  -5   8   7   11.60    1.32
  -5   8   7   10.70    1.22
   5   7   2   11.04    1.30
  -5   7   7   58.69    2.63
  -5   7   7   44.01    2.02
   5   6   2   40.71    2.18
  -5   6   7   50.19    2.41
  -5   6   7   41.24    1.95
   5   5   2   13.85    1.35
  -5   5   7   80.74    2.99
  -5   5   7   67.45    2.39
   5   4   2  250.97    4.99
  -5   4   7    0.53    0.53
  -5   4   7    0.01    0.49
  -5  -4  -2  224.83    4.87
   5   3   2    6.14    1.02
  -5   3   7    1.48    0.63
  -5   3   7    1.63    0.64
  -5  -3  -2    4.76    1.06
   5   2   2   43.56    2.06
  -5   2   7    9.43    1.11
  -5   2   7    7.16    1.01
  -5  -2  -2   37.82    2.10
   5   1   2    2.09    0.69
  -5   1   7  167.63    4.16
  -5  -1  -2    1.07    0.75
   5   0   2    0.37    0.43
  -5   0   7   60.41    2.53
  -5   0  -2    0.29    0.65
   5  -1   2    2.74    0.72
   5  -1   2    1.03    0.54
  -5  -1   7  169.29    4.15
  -5   1  -2    2.16    0.83
   5  -2   2   42.78    1.91
   5  -2   2   41.62    1.87
  -5  -2   7    7.96    1.13
  -5   2  -2   30.25    1.94
   5  -3   2    4.99    0.89
   5  -3   2    4.68    0.80
  -5  -3   7    1.93    0.68
  -5   3  -2    3.73    0.99
   5  -4   2  248.80    4.32
   5  -4   2  250.80    4.38
  -5  -4   7    0.21    0.47
  -5   4  -2  174.75    4.39
   5  -5   2   10.40    1.03
   5  -5   2   10.60    1.00
  -5  -5   7   82.34    2.98
  -5   5  -2    9.08    1.37
  -5  -6   7   49.14    2.35
   5   6  -7   51.17    2.39
  -5   6  -2   39.23    1.77
  -5   6  -2   28.83    1.98
   5   7  -7   57.32    2.58
   5   7  -7   54.64    2.50
  -5   7  -2   12.39    1.10
  -5   7  -2   10.17    1.42
   5   8  -7   13.97    1.41
   5   8  -7   13.66    1.34
  -5   8  -2   -0.65    0.64
   5   9  -7  157.47    4.32
   5   9  -7  156.73    4.28
  -5   9  -2    2.64    0.98
   5  10  -7   13.09    1.40
  -5  10  -2   69.00    3.10
   5  11  -7   29.77    2.04
  -5  11  -2    8.07    1.38
   5  12  -7    1.00    0.81
  -5  12  -2  114.66    4.07
   5  13  -7   -0.21    0.63
  -5  13  -2    2.07    1.00
   5  14  -7   14.67    1.63
   5  15  -7   23.87    2.03
  -5  15  -2   -0.74    0.56
   5  16  -7   30.78    2.28
   5  16  -7   26.98    2.22
  -5  16  -2    2.32    1.06
   5  17  -7   96.77    3.92
   5  17  -7   77.70    3.76
  -5  17  -2    7.70    1.47
   5  18  -7    7.19    1.46
  -5  18  -2   11.86    1.83
   5  19  -7    9.12    1.64
  -5  19  -2   -0.35    0.59
   5  20  -7    0.27    0.68
  -5  20  -2   16.33    1.99
   5  21  -7    0.49    0.76
  -5  21  -2    1.05    1.07
  -7  16   8    1.18    1.05
   7  15   1   18.37    2.17
  -7  15   8    8.34    1.67
   7  14   1    4.55    1.42
  -7  14   8    7.98    1.60
   7  13   1    0.01    0.87
  -7  13   8   60.29    3.37
   7  12   1    0.47    0.91
  -7  12   8   16.78    1.88
   7  11   1    8.06    1.60
  -7  11   8   37.83    2.64
   7  10   1   12.62    1.88
  -7  10   8    1.85    0.95
   7   9   1   43.59    2.81
  -7   9   8   10.40    1.63
   7   8   1   21.71    2.03
  -7   8   8    4.86    1.21
   7   7   1   59.26    3.12
  -7   7   8    4.75    1.19
   7   6   1    0.62    0.82
  -7   6   8    6.64    1.35
   7   5   1   47.96    2.75
  -7   5   8   84.47    3.63
  -7   5   8   70.70    3.01
   7   4   1   -0.03    0.67
  -7   4   8    7.34    1.38
  -7   4   8    4.59    1.04
   7   3   1    5.24    1.22
  -7   3   8  109.93    4.09
  -7  -3  -1    4.21    1.18
   7   2   1   49.92    2.68
  -7   2   8    8.23    1.42
  -7  -2  -1   37.13    2.51
   7   1   1   19.46    1.76
  -7   1   8   11.34    1.62
  -7  -1  -1   14.69    1.72
   7   0   1   41.01    2.39
  -7   0   8    0.03    0.61
  -7   0  -1   32.69    2.36
   7  -1   1   16.94    1.66
   7  -1   1   18.54    1.69
  -7  -1   8   10.26    1.55
  -7   1  -1   16.52    1.79
   7  -2   1   51.06    2.61
   7  -2   1   47.66    2.51
  -7  -2   8    7.63    1.39
  -7   2  -1   34.43    2.44
   7  -3   1    3.15    1.12
   7  -3   1    5.07    1.07
  -7  -3   8  110.52    4.10
  -7   3  -1    4.12    1.24
   7  -4   1    0.79    0.77
   7  -4   1    0.19    0.66
  -7  -4   8    5.38    1.23
  -7   4  -1    1.28    0.96
   7   5  -8   80.24    3.56
  -7   5  -1   30.28    2.34
   7   6  -8    6.16    1.33
   7   6  -8    5.06    1.20
  -7   6  -1   -0.54    0.75
   7   7  -8    3.54    1.17
   7   7  -8    5.09    1.18
  -7   7  -1   38.63    2.69
   7   8  -8    4.62    1.28
   7   8  -8    3.93    1.15
  -7   8  -1   16.37    1.96
   7   9  -8    8.77    1.58
   7   9  -8    9.77    1.55
  -7   9  -1   26.26    2.32
   7  10  -8    3.35    1.14
  -7  10  -1    8.85    1.70
   7  11  -8   33.97    2.56
  -7  11  -1    6.93    1.62
   7  12  -8   17.93    1.99
  -7  12  -1   -0.52    0.81
   7  13  -8   63.02    3.49
  -7  13  -1   -0.50    0.88
   7  14  -8    4.95    1.44
  -7  14  -1    2.65    1.28
   7  15  -8    5.91    1.56
  -7  15  -1   11.74    2.03
   7  16  -8    0.18    0.96
  -7  16  -1    2.30    1.33
   7  17  -8    1.83    1.25
  -7  17  -1   20.33    2.41
   9   6   0   -0.99    0.81
   9   5   0   39.11    2.93
  -9   5   9    0.32    0.85
   9   4   0    0.10    0.93
  -9   4   9   -0.27    0.68
  -9   3   9    8.71    1.75
   9   2   0    0.10    0.91
  -9   2   9   28.80    2.57
   9   1   0    0.95    1.01
  -9   1   9    6.12    1.56
  -9  -1   0    4.83    1.44
   9   0   0   -0.45    0.86
  -9   0   9   55.79    3.46
  -9   0   0   -0.50    0.76
  -9  -1   9    7.20    1.60
  -9   1   0    2.27    1.13
   9   2  -9   28.15    2.57
  -9   2   0    0.42    0.94
   9   3  -9    8.93    1.83
   9   3  -9    8.27    1.68
  -9   3   0   38.84    2.97
   9   4  -9    0.43    0.91
  -9   4   0    1.28    1.08
  -9   5   0   25.36    2.48
  -9   6   0    0.84    1.04
  -9   7   0    7.90    1.72
  -9   8   0    0.47    1.03
  -9   9   0    1.05    1.11
   0  25   5    2.84    1.34
   0  24   5    0.14    1.01
   0  23   5   34.00    2.65
   0  22   5    1.85    1.04
   0  21   5   38.49    2.63
   0  20   5    3.33    1.09
   0  19   5   69.92    3.24
   0  18   5    3.69    1.10
   0  17   5   12.64    1.44
   0  16   5    9.41    1.36
   0  16   5    7.52    1.02
   0  15   5   48.27    2.42
   0  15   5   48.01    2.01
   0  14   5    1.32    0.69
   0  14   5    1.86    0.54
   0  13   5  177.98    4.24
   0  13   5  166.45    3.32
   0  12   5   66.78    2.53
   0  12   5   62.39    1.95
   0  11   5  170.90    3.87
   0  11   5  164.82    2.95
   0  10   5   66.39    2.35
   0  10   5   61.43    1.70
   0   9   5    9.58    0.97
   0   9   5    9.19    0.68
   0   8   5  109.07    2.76
   0   8   5  106.43    1.91
   0   7   5  217.51    3.73
   0   7   5  204.53    2.42
   0   6   5   18.08    1.10
   0  -6  -5   12.79    1.13
   0   5   5  397.82    4.59
   0  -5  -5  285.54    3.97
   0   4   5    2.22    0.44
   0  -4  -5    1.86    0.67
   0   3   5  556.06    4.92
   0  -3  -5  314.66    3.88
   0   2   5    0.73    0.31
   0  -2  -5    2.29    0.58
   0   1   5  148.38    2.22
   0  -1  -5  104.09    2.14
   0   0   5    0.14    0.19
   0   0  -5    0.10    0.28
   0  -1   5  145.09    1.87
   0   1  -5  125.71    2.33
   0  -2   5    0.45    0.23
   0   2  -5    0.73    0.24
   0   2  -5    0.55    0.36
   0  -3   5  522.94    3.51
   0   3  -5  561.27    4.57
   0  -4   5    2.82    0.28
   0   4  -5    2.81    0.42
   0   5  -5  515.47    3.51
   0   5  -5  495.20    4.89
   0   6  -5   18.71    0.56
   0   6  -5   17.12    1.00
   0   7  -5  237.19    2.18
   0   7  -5  213.73    3.59
   0   8  -5  101.93    2.62
   0   9  -5   10.26    0.60
   0   9  -5    9.38    0.91
   0  10  -5   68.14    1.43
   0  10  -5   63.49    2.28
   0  11  -5  183.32    2.50
   0  11  -5  164.67    3.79
   0  12  -5   60.00    2.41
   0  13  -5  163.53    4.09
   0  14  -5    2.72    0.79
   0  15  -5   49.19    2.44
   0  16  -5    6.40    1.13
   0  17  -5   11.70    1.40
   0  18  -5    2.60    0.89
   0  19  -5   60.04    3.07
   0  20  -5    2.50    0.99
   0  21  -5   35.09    2.55
   0  22  -5    0.90    0.75
   0  23  -5   27.62    2.44
   0  24  -5    0.42    0.78
   0  25  -5    3.01    1.21
   2  24   4   35.37    2.85
   2  23   4    0.95    1.03
  -2  23   6   25.59    2.34
   2  22   4    3.74    1.26
  -2  22   6    2.75    1.18
   2  21   4    0.28    0.89
  -2  21   6    0.21    0.82
   2  20   4    5.25    1.30
   2  20   4    3.10    0.95
  -2  20   6    0.16    0.74
   2  19   4    5.54    1.30
   2  19   4    4.55    1.01
  -2  19   6   44.58    2.68
   2  18   4   46.94    2.73
   2  18   4   43.08    2.33
  -2  18   6   80.17    3.41
   2  17   4    8.45    1.39
   2  17   4   11.38    1.27
  -2  17   6   78.48    3.28
   2  16   4   75.22    3.20
   2  16   4   67.93    2.71
  -2  16   6   67.38    2.97
   2  15   4   24.06    1.84
   2  15   4   21.21    1.52
  -2  15   6   17.78    1.60
   2  14   4   21.87    1.71
  -2  14   6    4.68    1.01
   2  13   4    1.73    0.74
  -2  13   6    6.54    1.09
   2  12   4   10.40    1.17
  -2  12   6   39.80    2.07
  -2  12   6   37.15    1.54
   2  11   4   29.30    1.76
  -2  11   6   47.20    2.17
  -2  11   6   42.31    1.56
   2  10   4  113.07    3.22
  -2  10   6  116.37    3.23
  -2  10   6  107.00    2.27
   2   9   4  112.82    3.11
  -2   9   6  204.50    4.13
  -2   9   6  188.60    2.81
   2   8   4  250.02    4.42
  -2   8   6   81.42    2.55
  -2   8   6   71.86    1.65
   2   7   4   55.66    2.05
  -2   7   6  167.20    3.52
  -2   7   6  124.84    2.00
   2   6   4  453.22    5.51
  -2   6   6    4.86    0.75
  -2   6   6    2.10    0.39
   2  -6  -6    2.90    0.83
   2   5   4    9.84    0.89
  -2   5   6  154.11    3.17
   2  -5  -6   98.23    2.34
  -2  -5  -4    5.79    0.99
   2   4   4   16.28    1.03
  -2   4   6   14.12    1.01
   2  -4  -6    8.22    0.90
  -2  -4  -4   13.88    0.90
  -2  -4  -4    9.28    0.99
   2   3   4   31.84    1.32
  -2   3   6   46.68    1.68
   2  -3  -6   30.70    1.30
  -2  -3  -4   23.10    1.10
  -2  -3  -4   17.98    1.13
   2   2   4  100.38    2.17
  -2   2   6    5.97    0.70
   2  -2  -6    4.35    0.69
  -2  -2  -4   81.88    1.97
  -2  -2  -4   56.85    1.70
   2   1   4    9.68    0.71
  -2   1   6  463.70    4.95
   2  -1  -6  343.42    3.83
  -2  -1  -4    7.70    0.75
  -2  -1  -4    7.59    0.87
   2   0   4  295.68    3.32
  -2   0   6    0.62    0.36
   2   0  -6    0.01    0.31
  -2   0  -4  211.97    3.20
  -2   0  -4  213.69    3.05
   2  -1   4    9.86    0.63
  -2  -1   6  445.23    4.67
   2   1  -6  393.92    4.17
  -2   1  -4    6.67    0.75
  -2   1  -4    7.69    0.71
   2  -2   4  102.65    1.70
  -2  -2   6    5.57    0.66
   2   2  -6    4.61    0.65
  -2   2  -4   81.71    2.09
  -2   2  -4   86.77    1.97
   2  -3   4   30.92    0.89
  -2  -3   6   47.21    1.53
  -2   3  -4   28.01    1.19
  -2  -4   6   13.80    0.87
  -2   4  -4   14.99    1.02
  -2  -5   6  151.60    2.71
  -2   5  -4    8.56    0.86
  -2  -6   6    4.08    0.60
  -2   6  -4  450.03    5.53
   2   7  -6  160.37    2.94
   2   7  -6  158.92    3.29
   2   7  -6  153.11    2.82
  -2   7  -4   60.02    1.02
  -2   7  -4   57.59    2.09
   2   8  -6   83.91    2.17
   2   8  -6   76.19    2.39
   2   8  -6   76.05    2.04
  -2   8  -4  254.08    4.46
   2   9  -6  206.67    3.47
   2   9  -6  195.10    3.98
  -2   9  -4  110.99    3.06
   2  10  -6  116.91    2.70
   2  10  -6  110.16    3.12
  -2  10  -4  118.21    3.28
   2  11  -6   44.61    1.77
   2  11  -6   39.51    1.98
  -2  11  -4   31.59    1.81
   2  12  -6   39.42    1.72
   2  12  -6   32.48    1.87
  -2  12  -4   10.04    1.13
   2  13  -6    7.66    0.94
   2  13  -6    6.11    1.01
  -2  13  -4    0.77    0.55
   2  14  -6    4.30    0.80
   2  14  -6    3.30    0.82
  -2  14  -4   20.22    1.63
   2  15  -6   16.98    1.55
  -2  15  -4   24.58    1.82
   2  16  -6   59.61    2.87
  -2  16  -4   65.92    3.01
   2  17  -6   69.46    3.19
  -2  17  -4    8.72    1.36
   2  18  -6   75.34    3.42
  -2  18  -4   45.85    2.69
   2  19  -6   39.25    2.58
  -2  19  -4    6.24    1.32
   2  20  -6    0.00    0.59
  -2  20  -4    4.18    1.14
   2  21  -6   -0.25    0.50
  -2  21  -4    0.85    0.77
   2  22  -6    3.26    1.10
  -2  22  -4    3.69    1.18
   2  23  -6   24.10    2.32
  -2  23  -4    0.77    0.84
   2  24  -6   12.72    1.96
  -2  24  -4   34.33    2.78
   4  22   3   19.08    2.23
   4  22   3   16.61    1.88
   4  21   3    0.16    0.93
   4  21   3    0.58    0.71
  -4  21   7    1.11    1.03
   4  20   3   44.88    3.03
   4  20   3   38.84    2.61
  -4  20   7   39.18    2.73
   4  19   3   -0.29    0.74
   4  19   3    0.65    0.66
  -4  19   7    0.18    0.83
   4  18   3   13.49    1.91
  -4  18   7   12.40    1.75
   4  17   3    0.20    0.75
  -4  17   7   -0.20    0.68
   4  16   3    0.68    0.82
  -4  16   7   -0.19    0.71
   4  15   3    6.56    1.31
  -4  15   7    3.21    0.99
   4  14   3   71.54    3.23
  -4  14   7   54.04    2.74
   4  13   3   29.00    2.07
  -4  13   7    0.30    0.62
   4  12   3   40.01    2.35
  -4  12   7  128.77    3.97
   4  11   3   57.11    2.69
  -4  11   7    1.94    0.84
   4  10   3   16.59    1.51
  -4  10   7  162.04    4.27
   4   9   3    2.59    0.80
  -4   9   7    0.13    0.55
  -4   9   7   -0.29    0.53
   4   8   3    4.78    0.97
  -4   8   7   33.69    1.94
  -4   8   7   21.22    1.35
   4   7   3   34.26    1.91
  -4   7   7    0.76    0.56
  -4   7   7    1.15    0.58
   4   6   3   98.13    3.06
  -4   6   7  182.03    4.19
  -4   6   7  133.51    2.85
   4   5   3  105.52    3.09
  -4   5   7   13.49    1.24
  -4   5   7   10.08    0.98
   4   4   3  382.18    5.63
  -4   4   7  414.66    6.12
  -4   4   7  352.87    4.52
   4  -4  -7  277.65    3.58
  -4  -4  -3  341.86    5.41
   4   3   3    5.39    0.91
  -4   3   7    1.28    0.61
  -4   3   7    1.35    0.52
   4  -3  -7    1.21    0.63
  -4  -3  -3    4.13    0.93
   4   2   3  163.22    3.50
  -4   2   7   54.94    2.22
   4  -2  -7   36.97    1.39
  -4  -2  -3  129.86    3.33
  -4  -2  -3  106.36    2.39
   4   1   3    0.95    0.48
  -4   1   7   61.54    2.34
   4  -1  -7   48.73    1.53
  -4  -1  -3    0.10    0.55
  -4  -1  -3   -0.40    0.62
   4   0   3    0.83    0.47
  -4   0   7    0.75    0.48
   4   0  -7   -0.07    0.43
  -4   0  -3    0.47    0.59
  -4   0  -3   -0.18    0.58
   4  -1   3    0.86    0.50
  -4  -1   7   65.69    2.39
   4   1  -7   57.29    1.65
  -4   1  -3    0.24    0.57
  -4   1  -3   -0.35    0.52
   4  -2   3  155.29    3.08
  -4  -2   7   55.41    2.20
   4   2  -7   48.99    1.58
  -4   2  -3  112.75    3.18
  -4   2  -3  116.78    2.27
   4  -3   3    4.78    0.79
   4  -3   3    4.64    0.73
  -4  -3   7    1.70    0.61
   4   3  -7    0.93    0.47
  -4   3  -3    3.13    0.83
  -4   3  -3    3.34    0.72
   4  -4   3  362.80    4.47
   4  -4   3  367.83    4.56
  -4  -4   7  409.32    5.87
  -4   4  -3  264.54    4.91
  -4   4  -3  329.29    3.90
   4  -5   3   99.55    2.33
   4  -5   3  100.12    2.36
  -4  -5   7   12.41    1.15
  -4   5  -3   76.71    2.75
  -4   5  -3   99.23    2.25
   4  -6   3   90.69    2.17
  -4  -6   7  174.99    3.91
  -4   6  -3   74.04    2.75
  -4   6  -3   94.21    2.29
   4   7  -7    0.46    0.52
   4   7  -7    0.90    0.46
  -4   7  -3   35.27    1.43
  -4   7  -3   26.01    1.75
   4   8  -7   28.62    1.73
   4   8  -7   29.98    1.72
  -4   8  -3    2.96    0.83
   4   9  -7    0.40    0.53
   4   9  -7    0.01    0.42
  -4   9  -3    3.28    0.90
   4  10  -7  151.79    3.90
  -4  10  -3   13.10    1.38
   4  11  -7    1.34    0.72
  -4  11  -3   51.29    2.55
   4  12  -7  122.62    3.66
  -4  12  -3   35.48    2.20
   4  13  -7    0.08    0.56
   4  13  -7    0.15    0.40
  -4  13  -3   25.61    1.98
   4  14  -7   53.48    2.59
   4  14  -7   45.44    2.56
  -4  14  -3   59.10    2.94
   4  15  -7    1.07    0.77
   4  15  -7    2.08    0.84
  -4  15  -3    6.81    1.33
   4  16  -7    0.01    0.66
   4  16  -7    0.25    0.52
  -4  16  -3   -0.30    0.57
   4  17  -7    0.14    0.48
  -4  17  -3    0.73    0.79
   4  18  -7   11.87    1.71
  -4  18  -3    9.35    1.58
   4  19  -7    0.37    0.67
  -4  19  -3   -0.36    0.66
   4  20  -7   34.18    2.65
  -4  20  -3   36.38    2.72
   4  21  -7    1.65    0.92
  -4  21  -3    0.27    0.74
   4  22  -7   18.65    2.13
  -4  22  -3   13.27    1.95
   4  23  -7    0.61    0.87
  -4  23  -3   -0.22    0.81
   6  18   2    6.83    1.70
  -6  18   8   15.13    2.17
   6  17   2   16.99    2.06
  -6  17   8   17.01    2.03
   6  16   2    9.54    1.76
  -6  16   8   22.96    2.19
   6  15   2   32.08    2.56
  -6  15   8    9.13    1.65
   6  14   2    4.15    1.26
  -6  14   8    6.78    1.42
   6  13   2    3.27    1.15
  -6  13   8    8.94    1.51
   6  12   2    0.30    0.83
  -6  12   8    2.66    1.02
   6  11   2   19.46    1.95
  -6  11   8    5.85    1.28
   6  10   2   15.60    1.73
  -6  10   8   69.77    3.25
   6   9   2   81.74    3.51
  -6   9   8   72.96    3.28
   6   8   2    4.16    1.11
  -6   8   8   49.03    2.69
   6   7   2   87.08    3.48
  -6   7   8   56.06    2.83
   6   6   2    5.05    1.14
  -6   6   8   21.46    1.80
  -6   6   8   17.06    1.48
   6   5   2    3.33    1.00
  -6   5   8    1.74    0.80
  -6   5   8    1.94    0.75
   6   4   2    1.33    0.77
  -6   4   8   16.15    1.57
  -6   4   8   16.42    1.47
  -6  -4  -2    1.70    0.96
   6   3   2   43.25    2.32
  -6   3   8   11.81    1.40
  -6   3   8   10.99    1.27
  -6  -3  -2   35.46    2.26
   6   2   2   10.36    1.37
  -6   2   8   29.19    2.01
  -6  -2  -2    7.37    1.36
   6   1   2   99.62    3.32
  -6   1   8   34.31    2.16
  -6  -1  -2   79.79    3.26
   6   0   2    2.84    0.86
  -6   0   8   21.94    1.76
  -6   0  -2    1.60    0.97
   6  -1   2  101.73    3.25
  -6  -1   8   33.98    2.15
  -6   1  -2   74.52    3.16
   6  -2   2    7.89    1.18
   6  -2   2    9.40    1.11
  -6  -2   8   28.12    1.97
  -6   2  -2    6.82    1.30
   6  -3   2   43.34    2.15
   6  -3   2   43.24    2.12
  -6  -3   8   11.79    1.37
  -6   3  -2   33.26    2.26
   6  -4   2    1.87    0.81
   6  -4   2    1.82    0.70
  -6  -4   8   14.67    1.50
  -6   4  -2    1.70    0.93
   6  -5   2    3.67    0.84
  -6  -5   8    1.75    0.81
  -6   5  -2    2.96    1.07
   6   6  -8   18.61    1.67
  -6   6  -2    4.50    1.22
   6   7  -8   55.61    2.81
   6   7  -8   54.55    2.75
  -6   7  -2   65.01    3.16
   6   8  -8   53.60    2.81
   6   8  -8   46.50    2.57
  -6   8  -2    3.36    1.19
   6   9  -8   72.00    3.26
   6   9  -8   68.17    3.13
  -6   9  -2   56.04    3.02
   6  10  -8   69.59    3.24
  -6  10  -2   12.87    1.79
   6  11  -8    6.04    1.28
  -6  11  -2   12.53    1.83
   6  12  -8    2.73    1.07
  -6  12  -2    1.58    1.00
   6  13  -8    9.22    1.59
  -6  13  -2    2.79    1.13
   6  14  -8    6.46    1.41
  -6  14  -2    2.66    1.21
   6  15  -8    8.73    1.62
  -6  15  -2   24.18    2.29
   6  16  -8   22.81    2.21
  -6  16  -2    4.82    1.40
   6  17  -8   16.36    1.95
   6  17  -8    6.43    1.40
  -6  17  -2   11.57    1.89
   6  18  -8   10.05    1.74
  -6  18  -2    3.80    1.40
   6  19  -8   11.55    1.89
  -6  19  -2   -0.12    0.86
  -8  13   9   49.75    3.31
  -8  12   9   -0.06    0.93
   8  11   1   26.06    2.51
  -8  11   9   42.68    3.03
   8  10   1    4.70    1.39
  -8  10   9    0.33    0.90
   8   9   1    2.33    1.20
  -8   9   9    4.96    1.38
   8   8   1    0.16    0.93
  -8   8   9   -0.23    0.74
   8   7   1   10.34    1.79
  -8   7   9   19.71    2.07
   8   6   1    3.67    1.31
  -8   6   9    0.48    0.79
   8   5   1   26.89    2.30
  -8   5   9   72.80    3.67
   8   4   1   16.41    1.84
  -8   4   9   -0.22    0.68
   8   3   1   23.82    2.12
  -8   3   9   31.44    2.47
   8   2   1    7.21    1.43
  -8   2   9    0.07    0.65
  -8  -2  -1    5.94    1.43
   8   1   1   -0.10    0.79
  -8   1   9    1.81    0.93
  -8  -1  -1    1.39    0.97
   8   0   1    0.41    0.78
  -8   0   9   -0.54    0.59
  -8   0  -1    0.63    0.89
   8  -1   1    0.10    0.74
  -8  -1   9    2.21    1.00
  -8   1  -1    1.36    0.95
  -8  -2   9    0.48    0.83
  -8   2  -1    6.01    1.47
  -8  -3   9   31.24    2.47
  -8   3  -1   20.77    2.11
   8   4  -9   -0.26    0.86
   8   4  -9    0.13    0.73
  -8   4  -1   11.87    1.84
   8   5  -9   79.23    3.89
   8   5  -9   70.81    3.69
  -8   5  -1   18.71    2.08
   8   6  -9    1.40    1.02
   8   6  -9    0.10    0.72
  -8   6  -1    2.62    1.19
   8   7  -9   21.45    2.22
   8   7  -9   22.76    2.23
  -8   7  -1    6.26    1.50
   8   8  -9    0.50    1.00
   8   8  -9    0.28    0.85
  -8   8  -1    1.29    1.06
   8   9  -9    3.30    1.27
   8   9  -9    3.31    1.20
  -8   9  -1    0.84    1.04
   8  10  -9   -0.50    0.76
  -8  10  -1    1.88    1.16
  -8  11  -1   18.68    2.25
   8  12  -9   -0.38    0.89
  -8  12  -1    7.79    1.82
  -8  13  -1    7.83    1.83
   1  24   5   41.32    3.01
  -1  24   6    0.90    1.00
   1  23   5    0.54    0.87
  -1  23   6   12.94    1.97
   1  22   5    1.47    0.98
  -1  22   6   12.84    1.91
   1  21   5    1.65    0.94
  -1  21   6   29.99    2.38
   1  20   5    3.16    1.13
  -1  20   6   10.53    1.66
   1  19   5   -0.19    0.67
  -1  19   6   39.80    2.56
   1  18   5   82.11    3.48
  -1  18   6   25.37    2.05
   1  17   5   10.00    1.49
   1  17   5    6.51    1.04
  -1  17   6    0.00    0.64
   1  16   5  237.72    5.52
   1  16   5  218.51    4.52
  -1  16   6   16.77    1.62
   1  15   5   13.52    1.44
   1  15   5   11.82    1.12
  -1  15   6   43.95    2.35
   1  14   5   61.29    2.69
   1  14   5   57.12    2.16
  -1  14   6   16.85    1.49
   1  13   5    0.26    0.50
   1  13   5    0.13    0.31
  -1  13   6   61.58    2.59
   1  12   5    3.08    0.79
   1  12   5    4.26    0.67
  -1  12   6  122.05    3.48
  -1  12   6  115.05    2.51
   1  11   5   -0.16    0.37
   1  11   5    0.36    0.30
  -1  11   6  118.24    3.33
  -1  11   6  108.98    2.29
   1  10   5  338.16    5.40
  -1  10   6   31.04    1.71
  -1  10   6   31.30    1.17
   1   9   5   11.06    1.03
  -1   9   6   69.56    2.39
  -1   9   6   66.10    1.52
   1   8   5  301.21    4.74
  -1   8   6  101.32    2.79
  -1   8   6   95.53    1.65
   1   7   5    0.76    0.40
  -1   7   6   11.64    1.00
   1  -7  -6    8.44    1.19
   1   6   5   72.64    2.16
  -1   6   6  172.17    3.34
   1  -6  -6  112.44    2.70
  -1  -6  -5   50.96    1.94
   1   5   5   59.63    1.87
  -1   5   6  144.07    2.94
   1  -5  -6   81.08    2.22
  -1  -5  -5   44.93    1.79
   1   4   5   55.11    1.72
  -1   4   6   85.05    2.18
   1  -4  -6   50.95    1.74
  -1  -4  -5   32.84    1.51
   1   3   5    0.35    0.30
  -1   3   6  988.91    7.15
   1  -3  -6  589.18    5.46
  -1  -3  -5   -0.14    0.23
  -1  -3  -5    1.95    0.67
   1   2   5  197.88    2.86
  -1   2   6  259.21    3.47
   1  -2  -6  169.61    2.88
  -1  -2  -5  148.67    2.13
  -1  -2  -5  121.93    2.51
   1   1   5   13.04    0.74
  -1   1   6   51.51    1.50
   1  -1  -6   38.89    1.42
  -1  -1  -5    9.51    0.68
  -1  -1  -5    9.35    0.82
   1   0   5    4.92    0.46
  -1   0   6    0.53    0.28
   1   0  -6    0.17    0.32
  -1   0  -5    1.98    0.38
  -1   0  -5    2.93    0.58
   1  -1   5   14.25    0.65
  -1  -1   6   51.28    1.40
   1   1  -6   53.51    1.18
   1   1  -6   43.20    1.46
  -1   1  -5    9.88    0.79
   1  -2   5  200.88    2.07
  -1  -2   6  245.08    2.92
   1   2  -6  256.22    2.88
   1   2  -6  220.59    3.30
  -1   2  -5  188.41    2.78
  -1   2  -5  167.89    2.85
   1  -3   5    0.02    0.14
  -1  -3   6  920.98    5.73
   1   3  -6  958.26    6.21
  -1   3  -5    0.33    0.25
  -1   3  -5    0.42    0.37
  -1  -4   6   81.02    1.62
   1   4  -6   87.16    1.97
  -1   4  -5   58.24    1.73
  -1  -5   6  138.11    2.10
   1   5  -6  139.68    2.66
  -1   5  -5   77.77    2.08
   1   6  -6  166.09    3.08
  -1   6  -5   76.93    2.17
   1   7  -6   12.39    0.74
   1   7  -6   10.51    0.87
   1   7  -6    9.49    0.61
  -1   7  -5    0.96    0.40
   1   8  -6  102.09    1.98
   1   8  -6   91.07    2.54
  -1   8  -5  301.30    4.68
   1   9  -6   67.01    1.67
   1   9  -6   64.92    2.25
  -1   9  -5   15.77    1.18
   1  10  -6   33.61    1.28
   1  10  -6   28.08    1.57
  -1  10  -5  354.26    5.50
   1  11  -6  121.64    2.43
   1  11  -6  102.63    3.07
  -1  11  -5    0.41    0.43
   1  12  -6  125.89    2.56
   1  12  -6  114.66    3.37
  -1  12  -5    4.22    0.89
   1  13  -6   57.93    2.50
  -1  13  -5    0.00    0.40
   1  14  -6   15.85    1.41
  -1  14  -5   58.82    2.63
   1  15  -6   36.60    2.16
  -1  15  -5   12.67    1.37
   1  16  -6   15.30    1.52
  -1  16  -5  228.17    5.47
   1  17  -6    0.07    0.45
  -1  17  -5    7.35    1.26
   1  18  -6   20.82    1.86
  -1  18  -5   82.46    3.54
   1  19  -6   35.50    2.45
  -1  19  -5    0.11    0.52
   1  20  -6    8.82    1.50
  -1  20  -5    2.46    0.98
   1  21  -6   25.72    2.24
  -1  21  -5    0.35    0.60
   1  22  -6   10.55    1.69
  -1  22  -5    0.54    0.72
   1  23  -6   11.64    1.84
  -1  23  -5    0.34    0.78
   1  24  -6   -0.74    0.67
  -1  24  -5   37.36    2.89
   1  25  -6    0.38    0.87
  -1  25  -5    0.22    0.76
   3  23   4   12.32    2.03
   3  22   4    6.78    1.59
  -3  22   7    0.50    0.94
   3  21   4   17.85    2.07
  -3  21   7    4.17    1.31
   3  20   4   30.80    2.51
   3  20   4   30.21    2.20
  -3  20   7    3.09    1.15
   3  19   4   32.46    2.47
   3  19   4   27.37    2.04
  -3  19   7   31.44    2.37
   3  18   4    1.43    0.90
   3  18   4    1.88    0.77
  -3  18   7   -0.12    0.66
   3  17   4    2.40    1.02
   3  17   4    1.84    0.69
  -3  17   7  115.20    4.10
   3  16   4    2.20    0.97
  -3  16   7    0.01    0.64
   3  15   4   41.90    2.49
  -3  15   7   81.94    3.30
   3  14   4   45.11    2.49
  -3  14   7    1.01    0.72
   3  13   4   27.47    1.95
  -3  13   7    0.04    0.51
   3  12   4   75.93    3.00
  -3  12   7    9.99    1.31
   3  11   4  100.47    3.34
  -3  11   7  131.99    3.77
   3  10   4   19.71    1.51
  -3  10   7    3.46    0.82
   3   9   4   21.79    1.54
  -3   9   7  171.91    4.08
   3   8   4    1.91    0.69
  -3   8   7   43.54    2.07
  -3   8   7   30.38    1.32
   3   7   4   12.45    1.16
  -3   7   7   90.81    2.85
  -3   7   7   64.07    1.72
   3   6   4   73.62    2.47
  -3   6   7    2.29    0.64
  -3   6   7    1.26    0.43
   3  -6  -7    1.56    0.79
   3   5   4  139.34    3.24
  -3   5   7    7.77    0.94
   3  -5  -7    5.12    0.96
  -3  -5  -4   99.72    2.63
   3   4   4  226.63    3.98
  -3   4   7   20.95    1.38
   3  -4  -7   11.27    1.05
  -3  -4  -4  208.18    3.76
  -3  -4  -4  150.51    3.07
   3   3   4  123.01    2.86
  -3   3   7   13.25    1.12
   3  -3  -7    7.50    0.90
  -3  -3  -4  101.95    2.63
  -3  -3  -4   71.78    2.13
   3   2   4  111.08    2.62
  -3   2   7  168.15    3.50
   3  -2  -7  114.97    2.39
  -3  -2  -4   85.85    2.41
  -3  -2  -4   61.15    1.90
   3   1   4   28.19    1.33
  -3   1   7  378.29    5.15
   3  -1  -7  287.18    3.68
  -3  -1  -4   19.31    1.25
  -3  -1  -4   17.15    1.13
   3   0   4    0.55    0.38
  -3   0   7   94.29    2.57
   3   0  -7   77.33    1.97
  -3   0  -4    0.52    0.50
  -3   0  -4    0.41    0.53
   3  -1   4   27.27    1.21
  -3  -1   7  384.89    5.10
   3   1  -7  340.28    4.09
  -3   1  -4   20.11    1.33
  -3   1  -4   20.54    1.11
   3  -2   4  111.50    2.23
  -3  -2   7  169.09    3.38
   3   2  -7  149.72    2.79
  -3   2  -4   74.85    2.35
  -3   2  -4   90.02    2.13
   3  -3   4  116.06    2.17
  -3  -3   7   13.23    1.04
  -3   3  -4   92.00    2.64
  -3   3  -4  101.99    2.29
   3  -4   4  216.77    2.82
  -3  -4   7   20.41    1.24
  -3   4  -4  171.61    3.62
  -3   4  -4  209.45    3.30
   3  -5   4  127.60    2.08
   3  -5   4  134.68    2.18
  -3  -5   7    6.22    0.83
  -3   5  -4  114.06    3.03
  -3   5  -4  127.35    2.67
   3  -6   4   75.66    1.60
  -3  -6   7    1.66    0.55
   3  -7   4   11.19    0.67
   3   7  -7   87.44    2.50
  -3   7  -4   11.55    1.13
   3   8  -7   42.57    1.83
   3   8  -7   39.96    1.73
  -3   8  -4    1.05    0.59
   3   9  -7  174.92    3.68
   3   9  -7  172.11    3.61
  -3   9  -4   19.53    1.49
   3  10  -7    4.18    0.76
   3  10  -7    3.89    0.78
  -3  10  -4   19.78    1.51
   3  11  -7  122.55    3.22
   3  11  -7  110.62    3.44
  -3  11  -4  100.10    3.33
   3  12  -7   10.97    1.13
   3  12  -7    9.51    1.14
  -3  12  -4   64.56    2.79
   3  13  -7    0.38    0.58
   3  13  -7    0.50    0.48
  -3  13  -4   24.19    1.81
   3  14  -7    1.74    0.72
   3  14  -7    1.25    0.69
  -3  14  -4   40.30    2.36
   3  15  -7   69.80    3.12
  -3  15  -4   39.79    2.40
   3  16  -7    0.29    0.49
  -3  16  -4    0.94    0.74
   3  17  -7  105.31    4.05
  -3  17  -4    0.99    0.71
   3  18  -7    0.56    0.66
  -3  18  -4    1.96    0.92
   3  19  -7   23.31    2.09
  -3  19  -4   28.08    2.27
   3  20  -7    2.16    0.98
  -3  20  -4   31.23    2.47
   3  21  -7    4.37    1.28
  -3  21  -4   18.31    1.99
   3  22  -7    1.22    0.86
  -3  22  -4    5.39    1.43
   3  23  -7   27.13    2.51
  -3  23  -4   11.22    1.91
   5  21   3    0.43    0.74
   5  20   3    0.03    0.93
  -5  20   8   47.45    3.24
   5  19   3   12.84    2.01
  -5  19   8    6.45    1.60
   5  18   3    1.59    1.08
  -5  18   8    8.48    1.70
   5  17   3   80.63    3.91
  -5  17   8    1.28    1.03
   5  16   3    1.38    0.97
  -5  16   8   11.08    1.75
   5  15   3   48.69    2.94
  -5  15   8   14.43    1.78
   5  14   3    1.50    0.89
  -5  14   8   95.01    3.85
   5  13   3    3.30    1.09
  -5  13   8   19.48    1.87
   5  12   3    0.62    0.84
  -5  12   8  108.96    3.96
   5  11   3   74.93    3.29
  -5  11   8   81.68    3.38
   5  10   3    0.93    0.74
  -5  10   8   84.74    3.39
   5   9   3  114.89    3.86
  -5   9   8    0.68    0.70
   5   8   3    0.52    0.67
  -5   8   8    0.16    0.56
   5   7   3   46.70    2.40
  -5   7   8   -0.20    0.44
   5   6   3    1.99    0.78
  -5   6   8   10.09    1.22
  -5   6   8    6.30    0.96
   5   5   3    5.47    1.08
  -5   5   8   25.05    1.77
  -5   5   8   21.11    1.43
   5   4   3    5.11    0.99
  -5   4   8   67.47    2.78
  -5   4   8   54.13    2.11
  -5  -4  -3    3.57    1.02
   5   3   3   29.64    1.79
  -5   3   8   15.66    1.42
  -5   3   8   15.29    1.25
  -5  -3  -3   25.50    1.78
   5   2   3    2.65    0.77
  -5   2   8  134.41    3.83
  -5  -2  -3    1.64    0.84
   5   1   3   91.43    2.88
  -5   1   8   13.11    1.30
  -5  -1  -3   69.38    2.80
   5   0   3    1.34    0.63
  -5   0   8    0.35    0.49
  -5   0  -3    1.41    0.83
   5  -1   3   91.52    2.77
  -5  -1   8   12.18    1.27
  -5   1  -3   63.75    2.71
   5  -2   3    1.21    0.62
  -5  -2   8  136.86    3.82
  -5   2  -3    1.60    0.81
   5  -3   3   27.72    1.56
   5  -3   3   29.77    1.58
  -5  -3   8   15.08    1.38
  -5   3  -3   25.04    1.87
   5  -4   3    4.97    0.86
   5  -4   3    5.79    0.84
  -5  -4   8   59.09    2.55
  -5   4  -3    3.36    1.02
   5  -5   3    4.36    0.84
   5  -5   3    5.18    0.83
  -5  -5   8   23.21    1.67
  -5   5  -3    3.92    1.07
  -5  -6   8   10.04    1.18
  -5   6  -3    0.50    0.78
   5   7  -8    0.21    0.59
   5   7  -8    0.18    0.45
  -5   7  -3   36.89    2.28
   5   8  -8   -0.25    0.55
   5   8  -8   -0.18    0.48
  -5   8  -3    0.31    0.75
   5   9  -8    0.61    0.59
   5   9  -8    0.44    0.55
  -5   9  -3   80.74    3.31
   5  10  -8   82.33    3.22
   5  10  -8   75.87    3.06
  -5  10  -3   -0.05    0.71
   5  11  -8   82.46    3.26
  -5  11  -3   58.04    2.93
   5  12  -8  104.70    3.71
  -5  12  -3   -0.06    0.64
   5  13  -8   17.95    1.72
  -5  13  -3    1.27    0.88
   5  14  -8   93.96    3.65
  -5  14  -3    1.19    0.88
   5  15  -8   14.54    1.67
   5  15  -8    9.25    1.46
  -5  15  -3   37.00    2.58
   5  16  -8    9.31    1.58
   5  16  -8    8.07    1.44
  -5  16  -3    1.36    0.95
   5  17  -8    1.80    0.92
  -5  17  -3   63.30    3.45
   5  18  -8    7.43    1.52
  -5  18  -3    1.23    0.97
   5  19  -8    6.07    1.44
  -5  19  -3   10.57    1.78
   5  20  -8   37.79    2.91
  -5  20  -3   -0.33    0.78
   5  21  -8    6.58    1.55
  -5  21  -3   -0.03    0.87
  -7  16   9   28.99    2.58
   7  15   2   -0.05    0.92
  -7  15   9   15.56    2.14
   7  14   2   16.63    2.04
  -7  14   9   10.98    1.85
   7  13   2   14.32    2.08
  -7  13   9    7.86    1.61
   7  12   2   23.49    2.28
  -7  12   9    3.62    1.28
   7  11   2   12.29    1.92
  -7  11   9    0.45    0.84
   7  10   2   12.58    1.88
  -7  10   9   28.73    2.35
   7   9   2    4.81    1.34
  -7   9   9    8.63    1.53
   7   8   2    1.05    0.92
  -7   8   9   35.61    2.52
   7   7   2   -0.61    0.65
  -7   7   9   11.59    1.70
   7   6   2   32.81    2.37
  -7   6   9   42.77    2.69
   7   5   2   10.81    1.63
  -7   5   9    0.37    0.74
   7   4   2   38.33    2.45
  -7   4   9    0.36    0.69
   7   3   2   71.39    3.23
  -7   3   9    1.20    0.80
  -7  -3  -2   55.08    3.03
   7   2   2   28.85    2.09
  -7   2   9   73.49    3.40
  -7  -2  -2   22.51    2.06
   7   1   2    3.95    1.07
  -7   1   9   17.21    1.77
  -7  -1  -2    3.95    1.25
   7   0   2   -0.50    0.64
  -7   0   9  112.99    4.18
  -7   0  -2   -0.40    0.78
   7  -1   2    2.81    0.96
  -7  -1   9   20.21    1.88
  -7   1  -2    3.12    1.17
   7  -2   2   26.39    1.94
  -7  -2   9   70.33    3.33
  -7   2  -2   23.22    2.08
  -7  -3   9    0.23    0.66
  -7   3  -2   55.33    3.07
  -7  -4   9   -0.39    0.64
  -7   4  -2   28.83    2.32
  -7  -5   9    0.30    0.72
  -7   5  -2    9.40    1.65
   7   6  -9   42.16    2.71
   7   6  -9   40.11    2.61
  -7   6  -2   25.79    2.26
   7   7  -9   13.65    1.86
   7   7  -9   12.91    1.70
  -7   7  -2   -0.44    0.84
   7   8  -9   34.03    2.49
   7   8  -9   33.15    2.39
  -7   8  -2   -0.03    0.93
   7   9  -9    9.60    1.62
   7   9  -9    8.41    1.50
  -7   9  -2    0.86    1.02
   7  10  -9   30.42    2.42
   7  10  -9   27.50    2.23
  -7  10  -2    6.92    1.60
   7  11  -9    1.11    0.90
  -7  11  -2    9.69    1.82
   7  12  -9    4.53    1.31
  -7  12  -2   12.42    1.94
   7  13  -9    7.38    1.58
  -7  13  -2    7.78    1.68
   7  14  -9    7.61    1.62
  -7  14  -2    7.75    1.73
   7  15  -9   13.29    2.02
  -7  15  -2   -0.59    0.86
   7  16  -9   30.18    2.70
  -7  16  -2    1.15    1.18
  -7  17  -2    0.57    1.22
   9   6   1    7.71    1.76
   9   5   1    0.88    1.09
   9   4   1    0.03    1.02
   9   3   1    0.23    0.95
   9   1   1    0.40    1.02
  -9  -1  -1    1.69    1.15
  -9   0  -1   20.67    2.27
  -9   1  -1    0.62    0.96
  -9   2  -1    9.51    1.79
  -9   3  -1   -0.76    0.74
  -9   4  -1    0.84    1.05
  -9   5  -1    0.89    1.09
  -9   6  -1    5.51    1.54
  -9   7  -1    2.32    1.25
  -9   8  -1   11.94    2.07
   0  24   6   30.14    2.66
   0  23   6    2.37    1.22
   0  22   6    3.68    1.22
   0  21   6    0.29    0.73
   0  20   6    1.61    0.95
   0  19   6    0.21    0.73
   0  18   6   47.54    2.70
   0  17   6    8.09    1.39
   0  16   6  162.36    4.59
   0  15   6    9.83    1.36
   0  14   6   56.53    2.60
   0  13   6    1.76    0.72
   0  13   6    1.82    0.50
   0  12   6    0.27    0.48
   0  12   6    0.56    0.34
   0  11   6   25.79    1.64
   0  11   6   24.29    1.15
   0  10   6  191.97    4.11
   0  10   6  185.37    2.83
   0   9   6   17.79    1.30
   0   9   6   17.19    0.84
   0   8   6  364.88    5.25
   0   8   6  349.20    3.33
   0   7   6    0.23    0.36
   0   7   6    0.18    0.18
   0  -7  -6    0.21    0.78
   0   6   6  135.26    2.97
   0  -6  -6   81.45    2.41
   0   5   6    0.16    0.31
   0  -5  -6   -0.12    0.55
   0   4   6    9.01    0.79
   0  -4  -6    4.75    0.74
   0   3   6   16.93    0.97
   0  -3  -6    9.99    0.92
   0   2   6  462.63    4.53
   0  -2  -6  293.15    3.94
   0   1   6  114.24    2.12
   0  -1  -6   83.82    2.12
   0   0   6  182.04    2.48
   0   0  -6  140.35    2.69
   0  -1   6  112.43    1.82
   0   1  -6  120.15    1.86
   0   1  -6   88.92    2.16
   0  -2   6  429.00    3.39
   0   2  -6  463.57    4.04
   0   2  -6  380.68    4.48
   0  -3   6   16.26    0.64
   0   3  -6   17.39    0.88
   0   3  -6   13.47    0.99
   0   4  -6    8.22    0.66
   0   5  -6    0.30    0.24
   0   6  -6  138.42    2.84
   0   7  -6    0.19    0.17
   0   7  -6    0.41    0.31
   0   8  -6  352.27    5.00
   0   9  -6   19.07    1.26
   0  10  -6  197.01    4.08
   0  11  -6   26.87    1.62
   0  12  -6    0.14    0.38
   0  13  -6    2.46    0.71
   0  14  -6   48.73    2.40
   0  15  -6    6.89    1.12
   0  16  -6  149.46    4.45
   0  17  -6    7.56    1.29
   0  18  -6   43.36    2.60
   0  19  -6   -0.49    0.47
   0  20  -6    0.89    0.71
   0  21  -6    0.55    0.77
   0  22  -6    2.91    1.12
   0  23  -6    3.08    1.22
   0  24  -6   25.14    2.44
   0  25  -6    0.64    0.86
  -2  24   7    2.42    1.25
   2  23   5   28.28    2.56
  -2  23   7   12.12    1.96
   2  22   5    2.26    1.14
  -2  22   7   39.18    2.80
   2  21   5   27.26    2.39
  -2  21   7    7.89    1.56
   2  20   5    1.28    0.97
  -2  20   7   28.82    2.30
   2  19   5   50.27    2.94
  -2  19   7   19.78    1.94
   2  18   5    5.15    1.25
  -2  18   7   21.21    1.93
   2  17   5    3.44    1.15
   2  17   5    5.66    1.02
  -2  17   7    1.76    0.91
   2  16   5   -0.31    0.59
   2  16   5    0.22    0.45
  -2  16   7    0.98    0.78
   2  15   5  127.68    4.11
   2  15   5  115.78    3.36
  -2  15   7    3.37    1.00
   2  14   5    1.12    0.70
  -2  14   7    8.41    1.29
   2  13   5  105.18    3.52
  -2  13   7    4.71    0.99
   2  12   5    2.95    0.84
  -2  12   7  156.37    4.10
   2  11   5  188.70    4.40
  -2  11   7   19.55    1.51
   2  10   5   86.64    2.90
  -2  10   7   44.70    2.12
   2   9   5   63.34    2.43
  -2   9   7   28.83    1.69
   2   8   5   40.60    1.89
  -2   8   7    4.27    0.82
   2   7   5    1.96    0.58
  -2   7   7  146.46    3.43
   2  -7  -7   97.73    2.69
   2   6   5  155.85    3.37
  -2   6   7  368.86    5.26
   2  -6  -7  226.72    3.85
  -2  -6  -5  108.60    2.87
   2   5   5  219.02    3.81
  -2   5   7  182.05    3.60
   2  -5  -7  106.13    2.61
  -2  -5  -5  143.52    3.15
   2   4   5  156.71    3.10
  -2   4   7  379.35    5.04
   2  -4  -7  219.81    3.55
  -2  -4  -5  154.54    2.79
  -2  -4  -5   95.55    2.52
   2   3   5  270.96    3.88
  -2   3   7  184.38    3.43
   2  -3  -7  114.97    2.55
  -2  -3  -5  224.20    3.32
  -2  -3  -5  155.39    3.05
   2   2   5   13.95    0.90
  -2   2   7  316.22    4.38
   2  -2  -7  222.01    3.42
  -2  -2  -5    9.71    0.81
  -2  -2  -5    8.43    0.94
   2   1   5  112.68    2.26
  -2   1   7  104.60    2.49
   2  -1  -7   79.32    2.06
  -2  -1  -5   84.03    2.07
  -2  -1  -5   73.51    2.04
   2   0   5    0.01    0.25
  -2   0   7    0.05    0.29
   2   0  -7   -0.22    0.31
  -2   0  -5    0.02    0.34
  -2   0  -5   -0.20    0.39
   2  -1   5  115.51    2.02
  -2  -1   7   99.09    2.31
   2   1  -7   89.59    2.20
  -2   1  -5   85.37    2.17
  -2   1  -5   88.34    2.17
   2  -2   5   13.97    0.71
  -2  -2   7  307.61    3.99
   2   2  -7  287.32    3.96
  -2   2  -5   11.49    0.93
  -2   2  -5   10.42    0.89
   2  -3   5  269.99    2.66
  -2  -3   7  175.99    3.00
  -2   3  -5  224.28    3.65
  -2   3  -5  235.10    3.57
  -2  -4   7  356.57    4.24
  -2   4  -5  151.67    3.11
  -2   4  -5  146.97    2.90
  -2  -5   7  167.88    2.92
   2   5  -7  168.38    3.14
  -2   5  -5  226.69    3.93
  -2  -6   7  347.50    4.22
   2   6  -7  347.77    4.74
  -2   6  -5  152.76    3.34
   2   7  -7  133.07    3.08
   2   7  -7  134.67    2.68
  -2   7  -5    2.42    0.60
   2   8  -7    4.67    0.69
   2   8  -7    3.39    0.64
   2   8  -7    4.56    0.61
  -2   8  -5   40.37    1.88
   2   9  -7   28.90    1.36
   2   9  -7   27.46    1.56
  -2   9  -5   55.55    2.25
   2  10  -7   46.40    1.74
   2  10  -7   41.70    1.98
  -2  10  -5   80.82    2.79
   2  11  -7   21.93    1.27
   2  11  -7   19.60    1.45
  -2  11  -5  185.04    4.33
   2  12  -7  166.22    3.37
   2  12  -7  142.91    3.90
  -2  12  -5    3.46    0.85
   2  13  -7    3.39    0.83
  -2  13  -5   98.75    3.39
   2  14  -7    9.62    1.18
  -2  14  -5    0.46    0.53
   2  15  -7    2.95    0.86
  -2  15  -5  123.29    4.04
   2  16  -7   -0.07    0.45
  -2  16  -5    0.72    0.60
   2  17  -7    2.65    0.94
  -2  17  -5    6.03    1.21
   2  18  -7   17.71    1.78
  -2  18  -5    4.95    1.17
  -2  19  -5   44.69    2.78
   2  20  -7   28.12    2.30
  -2  20  -5    1.70    0.90
   2  21  -7    5.46    1.31
  -2  21  -5   28.36    2.36
   2  22  -7   34.36    2.68
  -2  22  -5    1.76    0.99
   2  23  -7   10.27    1.80
  -2  23  -5   23.80    2.31
   2  24  -7    1.91    1.09
  -2  24  -5    2.49    1.13
  -4  22   8   -0.18    0.91
   4  21   4    0.71    1.00
  -4  21   8    0.52    0.97
   4  20   4    1.54    1.11
   4  20   4    0.93    0.71
  -4  20   8    2.55    1.19
   4  19   4    8.34    1.65
   4  19   4    3.67    1.04
  -4  19   8   19.69    2.04
   4  18   4    3.03    1.19
  -4  18   8    2.04    1.04
   4  17   4   18.01    1.94
  -4  17   8   38.74    2.59
   4  16   4   52.20    2.99
  -4  16   8    4.51    1.17
   4  15   4   13.04    1.62
  -4  15   8   81.23    3.48
   4  14   4    0.12    0.68
  -4  14   8    1.97    0.90
   4  13   4   25.77    2.00
  -4  13   8   39.93    2.39
   4  12   4    5.76    1.20
  -4  12   8    4.22    1.05
   4  11   4    5.97    1.15
  -4  11   8   29.65    2.03
   4  10   4   29.90    2.00
  -4  10   8   27.59    1.92
   4   9   4  118.51    3.69
  -4   9   8  198.64    4.76
   4   8   4    6.71    1.09
  -4   8   8    0.39    0.59
   4   7   4  176.62    4.24
  -4   7   8  145.85    3.94
   4   6   4    5.09    0.95
  -4   6   8   19.48    1.52
   4   5   4    4.78    0.91
  -4   5   8   42.55    2.11
   4  -5  -8   29.16    1.57
  -4  -5  -4    6.74    1.07
   4   4   4    1.75    0.67
  -4   4   8   11.03    1.15
  -4   4   8    8.77    0.89
   4  -4  -8    5.49    1.01
  -4  -4  -4    1.33    0.71
  -4  -4  -4    1.61    0.97
   4   3   4  154.07    3.56
  -4   3   8   76.65    2.71
   4  -3  -8   52.37    1.82
  -4  -3  -4  129.01    3.39
  -4  -3  -4  101.63    2.61
   4   2   4   71.68    2.40
  -4   2   8    3.84    0.85
   4  -2  -8    2.71    0.79
  -4  -2  -4   51.03    2.21
  -4  -2  -4   39.60    1.75
   4   1   4  376.56    5.21
  -4   1   8  254.10    4.77
   4  -1  -8  179.40    3.07
  -4  -1  -4  281.63    4.95
  -4  -1  -4  218.96    3.53
   4   0   4   15.72    1.18
  -4   0   8   12.48    1.19
   4   0  -8   10.29    0.95
  -4   0  -4   11.64    1.29
  -4   0  -4    9.54    1.07
   4  -1   4  368.31    4.86
  -4  -1   8  244.43    4.64
   4   1  -8  214.36    3.40
  -4   1  -4  273.52    4.92
  -4   1  -4  247.06    3.63
   4  -2   4   67.08    2.07
  -4  -2   8    4.25    0.83
   4   2  -8    4.61    0.76
  -4   2  -4   49.48    2.24
  -4   2  -4   49.83    1.73
   4  -3   4  151.00    2.95
  -4  -3   8   76.00    2.61
   4   3  -8   72.96    2.13
  -4   3  -4  106.67    3.21
  -4   3  -4  120.62    2.59
   4  -4   4    0.93    0.50
  -4  -4   8   12.09    1.15
  -4   4  -4    1.24    0.74
  -4   4  -4    1.17    0.60
   4  -5   4    1.87    0.54
   4  -5   4    6.31    0.74
  -4  -5   8   41.83    1.97
  -4   5  -4    5.98    1.07
  -4   5  -4    6.42    0.94
  -4  -6   8   19.05    1.40
  -4   6  -4    4.88    0.99
  -4   6  -4    5.61    0.92
  -4  -7   8  144.66    3.63
  -4   7  -4  136.53    3.83
  -4   7  -4  163.49    3.30
   4   8  -8    0.64    0.56
   4   8  -8    0.65    0.47
  -4   8  -4    4.45    0.97
   4   9  -8  193.38    4.37
   4   9  -8  177.07    4.14
  -4   9  -4  102.53    3.48
   4  10  -8   24.28    1.66
   4  10  -8   24.47    1.62
   4  11  -8   28.11    1.81
  -4  11  -4    4.02    1.01
   4  12  -8    3.17    0.92
   4  12  -8    3.57    0.90
  -4  12  -4    5.12    1.12
   4  13  -8   38.89    2.19
   4  13  -8   31.50    2.11
  -4  13  -4   20.15    1.80
   4  14  -8    1.22    0.76
   4  14  -8    1.30    0.69
  -4  14  -4   -0.08    0.57
   4  15  -8   72.09    3.33
  -4  15  -4    8.59    1.44
   4  16  -8    5.32    1.19
  -4  16  -4   48.56    2.87
   4  17  -8   33.99    2.47
  -4  17  -4   15.63    1.80
   4  18  -8    0.94    0.74
  -4  18  -4    4.83    1.29
   4  19  -8   16.23    1.87
  -4  19  -4    5.44    1.36
   4  20  -8    1.70    0.93
  -4  20  -4    1.25    0.93
   4  21  -8   -0.10    0.58
  -4  21  -4    0.35    0.87
   4  22  -8   -0.16    0.72
  -4  22  -4    0.11    0.88
  -6  19   9   11.99    2.05
  -6  18   9    2.32    1.30
   6  17   3   -0.32    0.82
  -6  17   9    0.72    1.02
   6  16   3    6.76    1.60
  -6  16   9    0.16    0.82
   6  15   3    0.60    0.86
  -6  15   9   15.24    1.88
   6  14   3   15.22    2.04
  -6  14   9    7.79    1.56
   6  13   3    5.97    1.40
  -6  13   9   24.96    2.18
   6  12   3   49.09    2.96
  -6  12   9   27.50    2.25
   6  11   3   14.22    1.70
  -6  11   9   51.66    2.93
   6  10   3   57.25    3.07
  -6  10   9   17.36    1.78
   6   9   3    4.59    1.23
  -6   9   9    1.06    0.76
   6   8   3    1.03    0.86
  -6   8   9    0.91    0.74
   6   7   3    7.55    1.37
  -6   7   9    3.10    1.01
   6   6   3   50.05    2.66
  -6   6   9   25.37    1.99
   6   5   3   -0.07    0.64
  -6   5   9  101.63    3.76
   6   4   3  112.26    3.74
  -6   4   9   43.20    2.48
  -6  -4  -3   94.89    3.59
   6   3   3    1.65    0.83
  -6   3   9   78.74    3.28
  -6  -3  -3    0.86    0.93
   6   2   3   94.99    3.33
  -6   2   9  100.16    3.67
  -6  -2  -3   71.10    3.15
   6   1   3    2.86    0.89
  -6   1   9   12.03    1.40
  -6  -1  -3    1.62    0.97
   6   0   3    0.23    0.58
  -6   0   9    0.22    0.55
  -6   0  -3    0.36    0.84
   6  -1   3    1.77    0.78
  -6  -1   9   10.24    1.45
  -6   1  -3    2.26    1.05
   6  -2   3   87.66    2.99
  -6  -2   9   92.48    3.51
  -6   2  -3   62.59    2.99
   6  -3   3    0.67    0.67
  -6  -3   9   74.67    3.16
  -6   3  -3    0.24    0.83
  -6  -4   9   38.28    2.32
  -6   4  -3   73.21    3.27
  -6  -5   9   94.14    3.56
  -6   5  -3    0.16    0.78
  -6  -6   9   25.19    1.93
  -6   6  -3   30.19    2.27
   6   7  -9    0.99    0.79
   6   7  -9    2.29    0.88
  -6   7  -3    4.98    1.30
   6   8  -9   -0.25    0.64
   6   8  -9    0.66    0.70
  -6   8  -3    0.54    0.89
   6   9  -9    1.03    0.84
   6   9  -9    1.08    0.78
  -6   9  -3    3.64    1.19
   6  10  -9   17.67    1.77
   6  10  -9   16.40    1.67
  -6  10  -3   35.60    2.54
   6  11  -9   50.99    2.85
  -6  11  -3    8.32    1.57
   6  12  -9   24.17    2.09
  -6  12  -3   29.98    2.43
   6  13  -9   22.55    2.06
  -6  13  -3    3.25    1.26
   6  14  -9    7.19    1.47
  -6  14  -3   10.13    1.75
   6  15  -9   15.37    1.84
  -6  15  -3   -0.27    0.85
   6  16  -9   -0.30    0.83
   6  16  -9    0.05    0.53
  -6  16  -3    5.05    1.47
   6  17  -9    1.10    0.81
  -6  17  -3    0.27    0.95
   6  18  -9    0.41    0.73
  -6  18  -3    8.06    1.82
   6  19  -9    6.16    1.52
  -6  19  -3    2.64    1.37
   8  11   2    3.51    1.45
  -8  11  10    0.41    0.98
   8  10   2    8.81    1.83
  -8  10  10   44.04    3.08
   8   9   2   11.59    1.98
  -8   9  10    0.53    0.92
   8   8   2   19.95    2.17
  -8   8  10   30.57    2.57
   8   7   2    7.77    1.64
  -8   7  10   -0.25    0.74
   8   6   2    9.31    1.75
  -8   6  10   22.28    2.19
   8   5   2    0.10    0.87
  -8   5  10    0.58    0.78
   8   4   2    0.27    0.92
  -8   4  10    2.72    1.09
   8   3   2    2.49    1.08
  -8   3  10   -0.24    0.64
  -8  -3  -2    1.83    1.02
   8   2   2   21.78    2.03
  -8   2  10   52.82    3.17
  -8  -2  -2   15.85    2.06
   8   1   2    3.11    1.15
  -8   1  10    0.52    0.79
  -8  -1  -2    1.04    0.91
  -8   0  10   34.08    2.57
  -8   0  -2   28.33    2.43
  -8  -1  10    0.53    0.79
  -8   1  -2    2.99    1.28
  -8  -2  10   47.84    3.02
  -8   2  -2   16.52    1.94
  -8  -3  10    0.10    0.74
  -8   3  -2    1.48    1.03
  -8  -4  10    1.76    1.01
  -8   4  -2    1.96    1.11
   8   5 -10    0.06    0.86
   8   5 -10    0.21    0.77
  -8   5  -2   -0.29    0.73
   8   6 -10   24.45    2.34
   8   6 -10   26.64    2.35
  -8   6  -2    7.33    1.61
   8   7 -10    0.45    0.98
   8   7 -10    0.02    0.81
  -8   7  -2    4.49    1.42
   8   8 -10   35.64    2.77
   8   8 -10   31.83    2.61
  -8   8  -2   13.50    2.08
   8   9 -10   -0.44    0.85
   8   9 -10    0.21    0.85
  -8   9  -2    7.98    1.71
  -8  10  -2    4.14    1.48
   8  11 -10    0.48    0.96
  -8  11  -2    1.69    1.29
  -8  12  -2    0.50    1.23
  -8  13  -2    1.07    1.22
   1  24   6    0.75    1.11
  -1  24   7    9.13    1.83
   1  23   6   15.59    2.20
   1  22   6    1.23    1.00
  -1  22   7    9.10    1.73
   1  21   6   32.93    2.55
  -1  21   7    0.52    0.90
   1  20   6    0.08    0.74
  -1  20   7    0.04    0.80
   1  19   6   47.00    2.83
  -1  19   7   15.22    1.76
   1  18   6   13.15    1.74
  -1  18   7   37.14    2.49
   1  17   6   30.58    2.21
  -1  17   7   73.45    3.29
   1  16   6    1.90    0.88
  -1  16   7   94.71    3.60
   1  15   6   21.17    1.78
  -1  15   7   15.18    1.55
   1  14   6    9.98    1.37
  -1  14   7   22.62    1.75
   1  13   6  113.71    3.61
   1  13   6  105.91    2.74
  -1  13   7    0.21    0.52
   1  12   6    3.09    0.83
   1  12   6    4.60    0.68
  -1  12   7   55.26    2.47
   1  11   6  184.48    4.28
   1  11   6  174.58    3.18
  -1  11   7   48.30    2.24
   1  10   6    1.37    0.62
  -1  10   7   39.36    1.97
   1   9   6    7.71    1.01
  -1   9   7  154.33    3.68
   1   8   6    0.06    0.33
  -1   8   7  114.11    3.07
   1  -8  -7   75.35    2.58
   1   7   6    1.15    0.52
  -1   7   7   62.49    2.22
   1  -7  -7   39.53    1.89
  -1  -7  -6    0.31    0.86
   1   6   6   16.38    1.16
  -1   6   7  138.03    3.15
   1  -6  -7   80.73    2.47
  -1  -6  -6   10.83    1.23
   1   5   6  794.25    7.08
  -1   5   7   11.66    0.99
   1  -5  -7    5.55    1.04
  -1  -5  -6  463.85    5.60
   1   4   6   27.31    1.32
  -1   4   7    1.80    0.54
   1  -4  -7    1.95    0.72
  -1  -4  -6   16.25    1.27
   1   3   6  582.86    5.52
  -1   3   7   29.28    1.34
   1  -3  -7   19.59    1.26
  -1  -3  -6  492.67    4.05
  -1  -3  -6  338.26    4.54
   1   2   6    1.90    0.44
  -1   2   7  206.06    3.29
   1  -2  -7  137.26    2.82
  -1  -2  -6    1.36    0.36
  -1  -2  -6    1.33    0.65
   1   1   6  149.54    2.48
  -1   1   7  151.34    2.71
   1  -1  -7  111.81    2.53
  -1  -1  -6  102.96    1.92
  -1  -1  -6  101.22    2.42
   1   0   6    0.18    0.24
  -1   0   7  865.49    6.31
   1   0  -7  666.38    6.11
  -1   0  -6    0.41    0.29
  -1   0  -6   -0.46    0.35
   1  -1   6  149.16    2.14
  -1  -1   7  148.33    2.51
   1   1  -7  155.68    2.13
   1   1  -7  127.29    2.69
  -1   1  -6  129.96    2.30
  -1   1  -6  114.45    2.55
   1  -2   6    1.41    0.29
  -1  -2   7  196.24    2.78
   1   2  -7  205.81    2.69
   1   2  -7  174.68    3.18
  -1   2  -6    1.08    0.35
  -1   2  -6    0.82    0.46
  -1  -3   7   28.43    1.07
   1   3  -7   30.86    1.15
   1   3  -7   24.58    1.29
  -1   3  -6  590.85    5.43
  -1   3  -6  503.03    5.43
  -1  -4   7    2.87    0.45
   1   4  -7    3.10    0.48
  -1   4  -6   26.08    1.24
  -1   4  -6   23.02    1.32
  -1  -5   7    9.92    0.67
   1   5  -7   10.98    0.82
  -1   5  -6  814.81    6.99
  -1  -6   7  128.11    2.10
   1   6  -7  129.73    2.81
  -1   6  -6   15.29    1.07
   1   7  -7   65.72    1.59
   1   7  -7   61.04    2.04
   1   7  -7   55.28    1.41
  -1   7  -6    0.40    0.34
   1   8  -7  111.77    2.07
   1   8  -7  106.19    2.80
  -1   8  -6    0.28    0.33
   1   9  -7  158.48    2.53
   1   9  -7  148.07    3.46
  -1   9  -6    5.55    0.86
   1  10  -7   35.91    1.31
   1  10  -7   32.97    1.75
  -1  10  -6    1.56    0.59
   1  11  -7   46.25    2.13
  -1  11  -6  187.88    4.28
   1  12  -7   50.76    2.31
  -1  12  -6    3.04    0.80
   1  13  -7    0.01    0.36
  -1  13  -6  112.03    3.56
   1  14  -7   19.84    1.60
  -1  14  -6   11.43    1.27
  -1  15  -6   21.23    1.73
   1  16  -7   85.70    3.43
  -1  16  -6    1.81    0.76
   1  17  -7   72.12    3.26
  -1  17  -6   29.85    2.16
   1  18  -7   33.12    2.33
  -1  18  -6    8.56    1.41
   1  19  -7   14.59    1.67
  -1  19  -6   41.57    2.67
   1  20  -7    1.03    0.79
  -1  20  -6    0.26    0.57
   1  21  -7    0.64    0.76
  -1  21  -6   27.10    2.31
   1  22  -7    9.10    1.66
  -1  22  -6   -0.55    0.55
   1  23  -7   13.36    1.99
  -1  23  -6   13.31    1.97
   1  24  -7   13.94    2.08
  -1  24  -6    0.42    0.87
  -3  23   8    1.13    1.04
   3  22   5    0.31    0.97
  -3  22   8   37.68    2.83
   3  21   5    1.71    1.10
  -3  21   8    0.91    1.02
   3  20   5    2.79    1.22
  -3  20   8   41.12    2.81
   3  19   5    5.96    1.39
  -3  19   8    0.76    0.90
   3  18   5   15.61    1.83
  -3  18   8   13.51    1.67
   3  17   5   60.18    3.17
   3  17   5   51.78    2.58
  -3  17   8    2.34    1.03
   3  16   5   63.99    3.17
  -3  16   8    5.59    1.23
   3  15   5   32.50    2.28
  -3  15   8   26.95    2.03
   3  14   5   19.39    1.74
  -3  14   8   38.35    2.32
   3  13   5    7.05    1.24
  -3  13   8   75.66    3.11
   3  12   5    4.47    1.04
  -3  12   8  215.28    5.06
   3  11   5   35.27    2.09
  -3  11   8   11.06    1.27
   3  10   5   38.86    2.10
  -3  10   8   38.35    2.10
   3   9   5   44.50    2.18
  -3   9   8    0.95    0.56
   3   8   5  110.74    3.27
  -3   8   8    2.63    0.75
   3   7   5   20.71    1.48
  -3   7   8    8.15    1.10
   3  -7  -8    9.27    1.35
   3   6   5  142.46    3.48
  -3   6   8  171.05    3.94
   3  -6  -8  111.34    2.83
  -3  -6  -5  101.74    2.92
   3   5   5   43.43    1.91
  -3   5   8    2.39    0.71
   3  -5  -8    1.86    0.89
  -3  -5  -5   39.81    1.78
  -3  -5  -5   29.78    1.70
   3   4   5   11.23    1.03
  -3   4   8  472.33    6.26
   3  -4  -8  280.31    4.14
  -3  -4  -5    8.94    0.99
  -3  -4  -5    8.12    1.26
   3   3   5   29.47    1.49
  -3   3   8   28.12    1.60
   3  -3  -8   18.95    1.25
  -3  -3  -5   22.34    1.37
  -3  -3  -5   18.26    1.33
   3   2   5  123.19    2.81
  -3   2   8  146.21    3.38
   3  -2  -8  103.66    2.47
  -3  -2  -5   95.72    2.61
  -3  -2  -5   71.98    2.21
   3   1   5  212.52    3.53
  -3   1   8    2.45    0.62
   3  -1  -8    2.23    0.65
  -3  -1  -5  155.17    3.30
  -3  -1  -5  132.88    2.87
   3   0   5  205.92    3.34
  -3   0   8   -0.11    0.34
   3   0  -8    0.14    0.42
  -3   0  -5  143.89    3.20
  -3   0  -5  132.55    2.82
   3  -1   5  212.22    3.24
  -3  -1   8    2.16    0.58
   3   1  -8    2.42    0.63
  -3   1  -5  146.54    3.29
  -3   1  -5  158.66    3.03
   3  -2   5  125.49    2.39
  -3  -2   8  137.83    3.14
   3   2  -8  125.15    2.76
  -3   2  -5   90.56    2.64
  -3   2  -5   95.18    2.38
   3  -3   5   30.12    1.17
  -3  -3   8   25.78    1.42
   3   3  -8   26.45    1.37
  -3   3  -5   20.83    1.38
  -3   3  -5   25.45    1.34
   3  -4   5   11.40    0.76
  -3  -4   8  441.22    5.55
  -3   4  -5    7.99    0.98
  -3   4  -5    9.44    0.93
  -3  -5   8    2.37    0.62
  -3   5  -5   34.21    1.77
  -3   5  -5   37.83    1.65
  -3  -6   8  160.17    3.38
  -3   6  -5  116.34    3.21
  -3   6  -5  125.94    2.95
  -3  -7   8    8.12    0.90
  -3   7  -5   18.46    1.42
   3   8  -8    1.72    0.61
   3   8  -8    3.00    0.66
   3   8  -8    2.59    0.60
  -3   8  -5  102.66    3.19
   3   9  -8    1.54    0.56
   3   9  -8    0.29    0.38
   3   9  -8    0.86    0.41
  -3   9  -5   45.50    2.22
   3  10  -8   37.56    1.82
   3  10  -8   35.32    1.94
  -3  10  -5   39.51    2.13
   3  11  -8   10.71    1.09
   3  11  -8   10.63    1.17
  -3  11  -5   34.95    2.06
   3  12  -8  222.89    4.40
   3  12  -8  197.98    4.81
  -3  12  -5    3.46    0.89
   3  13  -8   79.01    2.72
   3  13  -8   74.06    3.06
  -3  13  -5    5.96    1.12
   3  14  -8   34.77    2.20
  -3  14  -5   18.34    1.72
   3  15  -8   21.43    1.81
  -3  15  -5   31.42    2.21
   3  16  -8    3.62    1.03
  -3  16  -5   58.77    3.03
   3  17  -8    2.79    0.96
  -3  17  -5   58.20    3.11
   3  18  -8   14.06    1.66
  -3  18  -5   13.76    1.67
   3  19  -8    0.27    0.67
  -3  19  -5    4.55    1.26
   3  20  -8   38.00    2.74
  -3  20  -5    3.27    1.17
   3  21  -8    2.30    0.98
  -3  21  -5    1.19    0.95
   3  22  -8   34.67    2.78
  -3  22  -5    0.10    0.75
   3  23  -8    0.86    0.87
  -3  23  -5   11.34    1.93
  -5  20   9    0.24    1.07
   5  19   4    0.19    0.96
  -5  19   9   13.53    2.14
   5  18   4   41.64    3.00
  -5  18   9    4.72    1.41
   5  17   4    2.53    1.18
  -5  17   9   27.24    2.41
   5  16   4    1.86    1.01
  -5  16   9   14.75    2.01
   5  15   4    1.13    0.89
  -5  15   9   39.05    2.67
   5  14   4   29.95    2.34
  -5  14   9    0.76    0.89
   5  13   4    0.53    0.78
  -5  13   9   11.32    1.69
   5  12   4   85.75    3.66
  -5  12   9   11.66    1.66
   5  11   4    5.18    1.24
  -5  11   9   18.54    1.79
   5  10   4   10.22    1.51
  -5  10   9   65.40    3.08
   5   9   4    3.72    1.05
  -5   9   9  119.30    4.03
   5   8   4   27.45    1.98
  -5   8   9   21.99    1.82
   5   7   4    0.98    0.74
  -5   7   9   56.19    2.71
   5   6   4   71.08    2.89
  -5   6   9    1.13    0.69
   5   5   4   28.62    1.88
  -5   5   9    2.05    0.74
  -5  -5  -4   24.43    1.82
   5   4   4  218.92    4.78
  -5   4   9   36.65    2.15
  -5  -4  -4  175.96    4.43
   5   3   4    2.23    0.80
  -5   3   9   56.36    2.60
  -5  -3  -4    1.82    0.91
   5   2   4  115.52    3.34
  -5   2   9   45.91    2.34
  -5  -2  -4   95.28    3.29
   5   1   4    7.19    1.08
  -5   1   9  153.38    4.15
  -5  -1  -4    4.18    1.03
   5   0   4    0.47    0.53
  -5   0   9   39.63    2.17
  -5   0  -4    0.62    0.76
   5  -1   4    7.96    1.08
  -5  -1   9  155.22    4.15
  -5   1  -4    3.78    1.04
   5  -2   4  115.25    3.05
  -5  -2   9   47.59    2.35
  -5   2  -4   89.05    3.24
   5  -3   4    2.35    0.73
  -5  -3   9   54.81    2.51
  -5   3  -4    2.84    1.00
  -5  -4   9   37.69    2.10
  -5   4  -4  151.86    4.27
  -5  -5   9    1.36    0.67
  -5   5  -4   19.55    1.80
  -5  -6   9    1.03    0.66
  -5   6  -4   49.88    2.62
  -5  -7   9   55.58    2.56
  -5   7  -4    0.04    0.82
   5   8  -9   23.69    1.77
   5   8  -9   25.39    1.80
  -5   8  -4   21.76    1.94
   5   9  -9  116.13    3.78
   5   9  -9  109.19    3.64
  -5   9  -4    2.84    1.06
   5  10  -9   64.87    2.91
   5  10  -9   61.03    2.78
  -5  10  -4    7.34    1.41
   5  11  -9   19.55    1.71
  -5  11  -4    3.07    1.08
   5  12  -9   12.45    1.46
  -5  12  -4   73.01    3.39
   5  13  -9   13.33    1.55
  -5  13  -4    0.93    0.85
   5  14  -9    0.64    0.78
   5  14  -9   -0.11    0.50
  -5  14  -4   23.88    2.13
   5  15  -9   33.16    2.42
  -5  15  -4    0.44    0.80
   5  16  -9    9.71    1.54
  -5  16  -4    1.30    0.97
   5  17  -9   23.85    2.20
  -5  17  -4    0.88    0.87
   5  18  -9    2.73    1.05
  -5  18  -4   33.14    2.67
   5  19  -9   10.57    1.77
  -5  19  -4   -0.19    0.76
   5  20  -9    0.03    0.65
  -5  20  -4   12.36    1.99
  -7  15  10    9.00    1.77
   7  14   3    4.80    1.48
  -7  14  10    1.30    1.03
   7  13   3    1.43    1.10
  -7  13  10   28.22    2.48
   7  12   3    2.16    1.14
  -7  12  10    7.09    1.59
   7  11   3    3.94    1.31
  -7  11  10   32.01    2.57
   7  10   3    6.63    1.53
  -7  10  10   -0.53    0.67
   7   9   3   40.85    2.79
  -7   9  10    1.90    0.99
   7   8   3   17.09    1.91
  -7   8  10    2.22    0.97
   7   7   3   25.98    2.20
  -7   7  10    4.38    1.20
   7   6   3   16.36    1.81
  -7   6  10    9.26    1.56
   7   5   3   10.53    1.64
  -7   5  10  112.46    4.32
   7   4   3   10.51    1.62
  -7   4  10   10.90    1.67
  -7  -4  -3    7.78    1.51
   7   3   3    8.54    1.48
  -7   3  10   78.48    3.58
  -7  -3  -3    6.07    1.41
   7   2   3    6.77    1.31
  -7   2  10    5.52    1.28
  -7  -2  -3    5.19    1.35
   7   1   3   84.49    3.40
  -7   1  10   16.24    1.73
  -7  -1  -3   65.24    3.30
   7   0   3   16.36    1.64
  -7   0  10    0.91    0.79
  -7   0  -3   13.35    1.85
  -7  -1  10   14.79    1.67
  -7   1  -3   64.62    3.30
  -7  -2  10    5.27    1.24
  -7   2  -3    3.70    1.23
  -7  -3  10   76.90    3.53
  -7   3  -3    5.48    1.35
  -7  -4  10   12.14    1.70
  -7   4  -3    6.40    1.49
  -7  -5  10  104.42    4.12
  -7   5  -3    7.24    1.52
   7   6 -10    7.70    1.40
  -7   6  -3   10.84    1.75
   7   7 -10    3.05    1.10
   7   7 -10    3.01    1.05
  -7   7  -3   16.44    1.95
   7   8 -10    2.67    1.11
   7   8 -10    2.25    0.98
  -7   8  -3   11.12    1.84
   7   9 -10    1.28    0.96
   7   9 -10    1.14    0.89
  -7   9  -3   23.14    2.28
   7  10 -10   -0.11    0.74
   7  10 -10    0.18    0.75
  -7  10  -3    3.64    1.35
   7  11 -10   34.82    2.62
  -7  11  -3    3.30    1.37
   7  12 -10    5.60    1.46
  -7  12  -3    2.15    1.26
   7  13 -10   26.80    2.42
  -7  13  -3    0.96    1.14
   7  14 -10    0.50    1.01
  -7  14  -3    3.48    1.50
   7  15 -10    7.01    1.63
  -7  15  -3    7.84    1.86
   7  16 -10    0.36    0.71
  -7  16  -3    6.81    1.79
   9   5   2   22.79    2.40
   9   4   2    2.07    1.23
  -9  -1  -2    5.09    1.48
  -9   0  -2    0.49    0.85
  -9   1  -2    3.61    1.36
  -9   2  -2    0.33    0.92
  -9   3  -2   11.66    1.98
  -9   4  -2    2.00    1.22
  -9   5  -2   12.33    2.09
  -9   6  -2    0.07    0.92
   0  24   7    0.36    1.09
   0  23   7   10.99    1.93
   0  22   7    0.65    0.93
   0  21   7   65.95    3.51
   0  20   7    4.76    1.30
   0  19   7   37.11    2.54
   0  18   7   19.00    1.87
   0  17   7    7.79    1.41
   0  16   7    2.26    0.94
   0  15   7   45.64    2.49
   0  14   7   11.47    1.32
   0  13   7  123.16    3.76
   0  12   7    4.53    0.96
   0  11   7  143.28    3.81
   0  10   7   11.87    1.20
   0   9   7    2.49    0.70
   0   8   7   52.01    2.10
   0   8   7   55.45    1.25
   0  -8  -7   40.86    2.04
   0   7   7  108.37    2.89
   0  -7  -7   73.21    2.53
   0   6   7   19.67    1.28
   0  -6  -7   12.26    1.26
   0   5   7  699.25    6.76
   0  -5  -7  390.79    5.23
   0   4   7  261.33    3.96
   0  -4  -7  154.77    3.26
   0   3   7   78.21    2.10
   0  -3  -7   49.18    1.85
   0   2   7   57.33    1.72
   0  -2  -7   37.64    1.62
   0   1   7  105.49    2.19
   0  -1  -7   70.49    2.10
   0   0   7    0.00    0.25
   0   0  -7    3.34    0.40
   0   0  -7   -0.02    0.37
   0  -1   7  100.25    1.88
   0   1  -7  104.35    1.85
   0   1  -7   78.56    2.21
   0   2  -7   59.52    1.52
   0   2  -7   47.95    1.77
   0   3  -7   81.39    1.90
   0   3  -7   66.71    2.10
   0  -4   7  246.20    2.41
   0   4  -7  271.51    3.69
   0  -5   7  652.62    4.10
   0   5  -7  705.04    6.31
   0   6  -7   19.05    1.16
   0   7  -7  114.50    2.81
   0   8  -7   59.96    2.15
   0   9  -7    2.60    0.65
   0  10  -7   12.47    1.15
   0  11  -7  134.06    3.61
   0  12  -7    3.75    0.84
   0  13  -7  111.77    3.54
   0  14  -7   10.75    1.25
   0  15  -7   47.62    2.53
   0  16  -7    2.04    0.83
   0  17  -7    7.74    1.32
   0  18  -7   17.17    1.76
   0  19  -7   33.41    2.42
   0  20  -7    4.08    1.18
   0  21  -7   60.41    3.39
   0  22  -7    1.03    0.92
   0  23  -7    7.94    1.63
   0  24  -7    0.35    0.80
   2  23   6    0.72    1.04
  -2  23   8   15.65    2.20
   2  22   6   15.05    2.18
  -2  22   8    2.37    1.15
   2  21   6    0.41    0.85
  -2  21   8    0.30    0.87
   2  20   6    5.69    1.40
  -2  20   8    3.79    1.24
   2  19   6    2.62    1.12
  -2  19   8   21.12    2.01
   2  18   6   58.87    3.15
  -2  18   8    1.57    0.94
   2  17   6   20.07    1.90
  -2  17   8   81.36    3.53
   2  16   6  114.70    4.11
  -2  16   8   18.76    1.79
   2  15   6   11.93    1.49
  -2  15   8   47.36    2.60
   2  14   6   19.50    1.72
  -2  14   8    6.61    1.21
   2  13   6    3.17    0.92
  -2  13   8   20.82    1.71
   2  12   6   -0.06    0.46
  -2  12   8    4.86    1.03
   2  11   6    0.88    0.60
  -2  11   8   33.61    1.98
   2  10   6  165.76    4.11
  -2  10   8   10.98    1.20
   2   9   6   38.88    1.99
  -2   9   8  165.00    4.00
   2   8   6  210.54    4.33
  -2   8   8  186.61    4.13
   2  -8  -8  134.62    3.40
   2   7   6   65.04    2.37
  -2   7   8  169.85    3.84
   2  -7  -8  103.14    2.93
  -2  -7  -6   43.78    2.11
   2   6   6  118.33    3.04
  -2   6   8   82.66    2.63
   2  -6  -8   49.35    2.07
  -2  -6  -6   73.59    2.55
   2   5   6  134.35    3.11
  -2   5   8  114.60    2.99
   2  -5  -8   66.61    2.26
  -2  -5  -6   82.34    2.57
   2   4   6   44.23    1.77
  -2   4   8   71.61    2.32
   2  -4  -8   41.99    1.80
  -2  -4  -6   38.12    1.49
  -2  -4  -6   23.46    1.50
   2   3   6   16.16    1.07
  -2   3   8   11.74    1.05
   2  -3  -8    8.75    1.06
  -2  -3  -6   13.99    0.99
  -2  -3  -6   10.93    1.17
   2   2   6   43.65    1.58
  -2   2   8   66.58    2.15
   2  -2  -8   47.52    1.83
  -2  -2  -6   32.60    1.37
  -2  -2  -6   24.35    1.40
   2   1   6    1.58    0.44
  -2   1   8  368.71    4.83
   2  -1  -8  273.77    4.08
  -2  -1  -6    2.42    0.58
  -2  -1  -6    2.38    0.72
   2   0   6  288.61    3.56
  -2   0   8  129.56    2.82
   2   0  -8  103.48    2.55
  -2   0  -6  198.95    3.31
  -2   0  -6  202.55    3.53
   2  -1   6    1.36    0.38
  -2  -1   8  356.68    4.55
   2   1  -8  305.87    4.34
  -2   1  -6    1.63    0.50
  -2   1  -6    1.07    0.58
   2  -2   6   44.53    1.25
  -2  -2   8   69.10    2.01
   2   2  -8   68.94    1.73
   2   2  -8   60.17    2.00
  -2   2  -6   36.06    1.55
  -2   2  -6   33.89    1.51
  -2  -3   8   10.11    0.87
   2   3  -8   12.40    0.84
   2   3  -8   10.66    1.00
  -2   3  -6   13.49    1.06
  -2   3  -6   12.79    1.06
  -2  -4   8   70.39    1.97
   2   4  -8   70.29    1.98
  -2   4  -6   41.82    1.75
  -2   4  -6   37.45    1.66
  -2  -5   8  112.58    2.47
   2   5  -8  109.02    2.59
  -2   5  -6  130.26    3.09
  -2   5  -6  123.94    2.94
  -2  -6   8   73.83    2.01
   2   6  -8   73.97    2.25
  -2   6  -6  110.87    2.94
  -2  -7   8  160.70    2.96
   2   7  -8  159.08    3.44
  -2   7  -6   62.22    2.29
   2   8  -8  193.38    3.36
   2   8  -8  179.60    3.81
   2   8  -8  174.32    3.13
  -2   8  -6  206.32    4.26
   2   9  -8  162.89    3.12
   2   9  -8  153.23    3.67
   2   9  -8  149.09    2.94
  -2   9  -6   37.70    1.93
   2  10  -8   10.41    0.92
   2  10  -8    9.28    1.02
  -2  10  -6  158.02    3.98
   2  11  -8   32.86    1.54
   2  11  -8   29.04    1.77
  -2  11  -6    0.76    0.53
   2  12  -8    3.66    0.82
  -2  12  -6    0.14    0.42
   2  13  -8   19.23    1.59
  -2  13  -6    2.20    0.74
   2  14  -8    6.07    1.08
  -2  14  -6   20.53    1.70
   2  15  -8   45.79    2.53
  -2  15  -6   13.67    1.49
   2  16  -8   17.60    1.67
  -2  16  -6  108.98    3.98
   2  17  -8   74.38    3.40
  -2  17  -6   17.31    1.75
   2  18  -8    1.40    0.79
  -2  18  -6   59.96    3.16
   2  19  -8   17.93    1.87
  -2  19  -6    3.73    1.10
   2  20  -8    3.19    1.07
  -2  20  -6    5.40    1.30
   2  21  -8   -0.35    0.57
  -2  21  -6    0.80    0.74
   2  22  -8    1.39    0.97
  -2  22  -6   15.81    2.11
   2  23  -8   14.21    2.10
  -2  23  -6    0.01    0.75
   2  24  -8    3.45    1.37
  -2  24  -6   23.07    2.41
  -4  22   9   24.37    2.47
   4  21   5    1.11    1.05
  -4  21   9    1.35    1.09
   4  20   5    8.48    1.72
  -4  20   9   34.22    2.70
   4  19   5    6.31    1.54
  -4  19   9    7.83    1.56
   4  18   5    2.68    1.18
  -4  18   9   16.61    1.90
   4  17   5    3.06    1.19
  -4  17   9    0.18    0.76
   4  16   5    5.37    1.34
  -4  16   9    3.85    1.17
   4  15   5    9.53    1.59
  -4  15   9    7.12    1.40
   4  14   5   40.78    2.57
  -4  14   9   64.72    3.15
   4  13   5   26.17    2.07
  -4  13   9    8.55    1.43
   4  12   5  193.27    5.15
  -4  12   9  244.46    5.75
   4  11   5   52.44    2.69
  -4  11   9   14.15    1.53
   4  10   5   95.65    3.47
  -4  10   9  131.64    4.09
   4   9   5   12.11    1.34
  -4   9   9    1.38    0.74
   4   8   5    0.49    0.63
  -4   8   9    0.18    0.57
   4   7   5    4.45    0.94
  -4   7   9    3.17    0.87
   4   6   5   82.40    2.90
  -4   6   9   32.63    1.96
   4  -6  -9   23.43    1.60
   4   5   5   76.70    2.73
  -4   5   9    1.48    0.68
   4  -5  -9    0.19    0.81
  -4  -5  -5   71.71    2.64
  -4  -5  -5   54.69    2.28
   4   4   5  107.11    3.12
  -4   4   9  176.38    4.25
   4  -4  -9  108.70    2.74
  -4  -4  -5   98.25    3.04
  -4  -4  -5   76.91    2.58
   4   3   5   28.62    1.65
  -4   3   9   14.83    1.33
   4  -3  -9   10.35    1.16
  -4  -3  -5   20.29    1.54
  -4  -3  -5   16.66    1.48
   4   2   5   20.94    1.40
  -4   2   9   87.68    2.94
   4  -2  -9   61.99    2.08
  -4  -2  -5   16.37    1.40
  -4  -2  -5   13.48    1.33
   4   1   5    0.79    0.49
  -4   1   9    0.32    0.47
   4  -1  -9    0.05    0.56
  -4  -1  -5    1.45    0.73
  -4  -1  -5    0.48    0.82
   4   0   5    0.52    0.47
  -4   0   9   -0.18    0.40
   4   0  -9    0.72    0.57
  -4   0  -5   -0.11    0.60
  -4   0  -5    0.12    0.70
   4  -1   5    1.72    0.57
  -4  -1   9   -0.17    0.37
   4   1  -9    0.20    0.50
  -4   1  -5    0.78    0.70
  -4   1  -5    0.08    0.70
   4  -2   5   21.48    1.27
  -4  -2   9   88.46    2.87
   4   2  -9   81.09    2.34
  -4   2  -5   13.36    1.38
  -4   2  -5   15.45    1.20
   4  -3   5   26.49    1.34
  -4  -3   9   16.13    1.32
   4   3  -9   14.93    1.15
  -4   3  -5   18.73    1.59
  -4   3  -5   19.05    1.28
  -4  -4   9  169.35    3.94
   4   4  -9  162.23    3.44
  -4   4  -5   80.42    2.91
  -4   4  -5   91.68    2.50
  -4  -5   9    0.66    0.53
  -4   5  -5   57.19    2.54
  -4   5  -5   70.00    2.24
  -4  -6   9   31.49    1.77
  -4   6  -5   66.34    2.73
  -4   6  -5   75.45    2.36
  -4  -7   9    2.44    0.72
  -4   7  -5    3.42    0.91
  -4   7  -5    4.15    0.94
   4   8  -9    0.04    0.51
   4   8  -9    0.01    0.46
  -4   8  -5    0.69    0.66
  -4   8  -5    0.11    0.61
   4   9  -9    1.59    0.67
   4   9  -9    1.13    0.58
  -4   9  -5    7.16    1.20
   4  10  -9  126.37    3.63
   4  10  -9  123.61    3.54
  -4  10  -5   82.15    3.27
   4  11  -9   13.17    1.34
   4  11  -9   11.43    1.29
  -4  11  -5   39.77    2.39
   4  12  -9  247.88    5.17
   4  12  -9  227.67    5.44
  -4  12  -5  162.16    4.74
   4  13  -9   11.16    1.33
   4  13  -9    7.69    1.25
  -4  13  -5   23.76    1.98
   4  14  -9   63.19    3.08
  -4  14  -5   36.00    2.44
   4  15  -9    7.20    1.29
  -4  15  -5    7.96    1.41
   4  16  -9    4.99    1.18
  -4  16  -5    4.70    1.24
   4  17  -9    0.25    0.57
  -4  17  -5    3.21    1.08
   4  18  -9   15.03    1.77
  -4  18  -5    2.46    1.13
   4  19  -9    5.32    1.33
  -4  19  -5    4.56    1.33
   4  20  -9   35.42    2.76
  -4  20  -5    5.21    1.44
   4  21  -9   -0.07    0.64
  -4  21  -5    0.82    0.97
   4  22  -9   19.76    2.25
  -4  22  -5    6.84    1.66
  -6  18  10   18.07    2.44
   6  17   4   32.44    2.77
  -6  17  10   28.91    2.63
   6  16   4    0.47    0.92
  -6  16  10   28.98    2.56
   6  15   4   10.06    1.80
  -6  15  10   13.62    1.98
   6  14   4    5.44    1.41
  -6  14  10    5.72    1.42
   6  13   4    4.50    1.32
  -6  13  10    7.29    1.49
   6  12   4    0.99    0.94
  -6  12  10    3.47    1.15
   6  11   4    7.34    1.49
  -6  11  10    8.80    1.56
   6  10   4    3.26    1.12
  -6  10  10   50.97    2.94
   6   9   4   98.32    3.92
  -6   9  10   50.92    2.89
   6   8   4    6.47    1.36
  -6   8  10   24.11    2.04
   6   7   4   26.44    2.08
  -6   7  10   82.40    3.55
   6   6   4    2.94    1.01
  -6   6  10   31.35    2.25
   6   5   4   19.98    1.77
  -6   5  10   23.68    1.95
   6   4   4    3.20    0.98
  -6   4  10    3.02    0.97
  -6  -4  -4    1.66    0.96
   6   3   4   23.00    1.82
  -6   3  10    4.93    1.13
  -6  -3  -4   18.93    1.80
   6   2   4    6.36    1.20
  -6   2  10   39.08    2.39
  -6  -2  -4    3.97    1.15
   6   1   4  112.97    3.58
  -6   1  10   13.86    1.52
  -6  -1  -4   90.18    3.54
   6   0   4    1.68    0.78
  -6   0  10  181.35    4.96
  -6   0  -4   -0.07    0.84
   6  -1   4  114.14    3.47
  -6  -1  10   15.82    1.57
  -6   1  -4   84.52    3.46
  -6  -2  10   39.14    2.37
  -6   2  -4    4.46    1.25
  -6  -3  10    4.85    1.08
  -6   3  -4   15.31    1.75
  -6  -4  10    1.67    0.76
  -6   4  -4    2.05    1.07
  -6  -5  10   21.57    1.80
  -6   5  -4   14.12    1.72
  -6  -6  10   34.74    2.27
  -6   6  -4    1.87    1.09
  -6  -7  10   76.82    3.31
   6   7 -10   72.36    3.22
  -6   7  -4   18.69    1.98
   6   8 -10   24.37    2.00
   6   8 -10   27.87    2.08
  -6   8  -4    5.98    1.44
   6   9 -10   49.07    2.77
   6   9 -10   45.78    2.64
  -6   9  -4   68.32    3.42
   6  10 -10   58.04    3.04
   6  10 -10   52.10    2.83
  -6  10  -4    2.26    1.17
   6  11 -10    8.97    1.51
  -6  11  -4    5.23    1.39
   6  12 -10    4.29    1.21
  -6  12  -4    2.20    1.11
   6  13 -10    9.78    1.59
  -6  13  -4    2.82    1.27
   6  14 -10    3.46    1.21
  -6  14  -4    3.43    1.30
  -6  15  -4    5.13    1.42
   6  16 -10   21.43    2.17
  -6  16  -4   -0.15    0.90
   6  17 -10   18.47    2.07
  -6  17  -4   24.86    2.47
   6  18 -10   13.88    2.02
  -6  18  -4   -0.18    0.91
   8  10   3    7.93    1.80
  -8  10  11    0.73    0.98
   8   9   3    3.14    1.39
  -8   9  11    0.79    0.84
   8   8   3    2.28    1.28
  -8   8  11    0.82    0.92
   8   7   3    0.02    0.93
  -8   7  11   22.29    2.25
   8   6   3   12.01    1.91
  -8   6  11    0.12    0.80
   8   5   3   16.81    1.94
  -8   5  11   63.88    3.57
   8   4   3   28.25    2.37
  -8   4  11    0.82    0.85
   8   3   3   10.31    1.72
  -8   3  11   45.96    3.03
  -8  -3  -3   11.92    1.83
   8   2   3    8.76    1.63
  -8   2  11    5.73    1.42
  -8  -2  -3    9.37    1.71
  -8   1  11    7.49    1.53
  -8  -1  -3    3.85    1.28
  -8   0  11    0.06    0.69
  -8   0  -3    0.16    0.82
  -8  -1  11    5.30    1.39
  -8   1  -3    4.08    1.32
  -8  -2  11    5.07    1.34
  -8   2  -3    6.63    1.54
  -8  -3  11   41.89    2.89
  -8   3  -3    9.17    1.72
  -8  -4  11    1.17    0.93
  -8   4  -3   19.42    2.13
  -8  -5  11   68.32    3.66
   8   5 -11   64.14    3.58
  -8   5  -3   11.40    1.89
   8   6 -11    1.83    1.12
   8   6 -11    0.03    0.85
  -8   6  -3    7.77    1.68
   8   7 -11   23.25    2.31
   8   7 -11   22.22    2.24
  -8   7  -3   -0.33    0.81
   8   8 -11    0.29    0.99
   8   8 -11   -0.40    0.61
  -8   8  -3   -0.53    0.87
   8   9 -11   -0.98    0.89
   8   9 -11   -0.09    0.75
  -8   9  -3    2.50    1.31
   8  10 -11   -0.91    0.84
   8  10 -11   -0.05    0.82
  -8  10  -3    4.07    1.51
  -8  11  -3    9.96    2.01
  -8  12  -3    6.24    1.75
   1  23   7    0.79    1.03
  -1  23   8    3.81    1.38
   1  22   7    3.81    1.30
  -1  22   8   12.45    1.96
   1  21   7    0.52    0.91
  -1  21   8   22.39    2.21
   1  20   7    7.69    1.55
  -1  20   8   24.68    2.24
   1  19   7    0.03    0.74
  -1  19   8    2.19    1.03
   1  18   7   47.16    2.81
  -1  18   8    7.87    1.53
   1  17   7    1.55    0.90
  -1  17   8    9.08    1.52
   1  16   7  179.54    5.05
  -1  16   8    1.99    0.92
   1  15   7    1.11    0.82
  -1  15   8   37.81    2.34
   1  14   7   19.51    1.69
  -1  14   8   20.44    1.74
   1  13   7    4.34    1.00
  -1  13   8   91.25    3.34
   1  12   7    0.93    0.63
  -1  12   8  144.78    4.06
   1  11   7    1.84    0.68
  -1  11   8   53.78    2.45
   1  10   7  185.03    4.28
  -1  10   8   99.46    3.19
   1   9   7   10.21    1.12
  -1   9   8   33.87    1.86
   1   8   7  389.46    5.80
  -1   8   8   27.42    1.65
   1  -8  -8   18.15    1.59
  -1  -8  -7  257.89    4.85
   1   7   7    0.95    0.51
  -1   7   8    1.45    0.56
   1  -7  -8    1.71    0.93
  -1  -7  -7    1.13    0.99
   1   6   7  513.19    6.17
  -1   6   8  143.51    3.35
   1  -6  -8   86.56    2.70
  -1  -6  -7  305.31    4.97
   1   5   7  117.96    2.88
  -1   5   8  386.64    5.28
   1  -5  -8  220.86    4.05
  -1  -5  -7   64.27    2.35
   1   4   7   37.56    1.62
  -1   4   8  365.03    4.96
   1  -4  -8  213.47    3.90
  -1  -4  -7   35.78    1.17
  -1  -4  -7   20.40    1.44
   1   3   7   44.63    1.65
  -1   3   8  151.19    3.09
   1  -3  -8   92.03    2.55
  -1  -3  -7   35.73    1.16
  -1  -3  -7   28.23    1.55
   1   2   7   11.78    0.87
  -1   2   8    0.35    0.34
   1  -2  -8    1.39    0.65
  -1  -2  -7    9.37    0.71
  -1  -2  -7    9.07    1.15
   1   1   7    3.81    0.57
  -1   1   8   75.90    2.04
   1  -1  -8   55.99    1.97
  -1  -1  -7    0.89    0.37
  -1  -1  -7    1.35    0.64
   1   0   7  263.38    3.30
  -1   0   8   -0.06    0.31
   1   0  -8    0.76    0.51
  -1   0  -7  202.32    2.89
  -1   0  -7  194.50    3.57
   1  -1   7    1.31    0.35
  -1  -1   8   80.87    1.98
   1   1  -8   81.22    1.61
   1   1  -8   65.65    2.11
  -1   1  -7    1.80    0.43
  -1   1  -7    1.33    0.58
  -1  -2   8    0.41    0.31
   1   2  -8    0.97    0.29
   1   2  -8    0.31    0.39
  -1   2  -7   10.60    0.81
  -1   2  -7    9.82    0.95
  -1  -3   8  145.10    2.46
   1   3  -8  150.57    2.59
   1   3  -8  128.61    2.99
  -1   3  -7   43.13    1.56
  -1   3  -7   37.96    1.67
  -1  -4   8  344.25    3.70
   1   4  -8  357.25    4.28
   1   4  -8  310.66    4.72
  -1   4  -7   38.31    1.56
  -1   4  -7   31.55    1.59
  -1  -5   8  366.18    3.74
   1   5  -8  377.72    4.66
  -1   5  -7  118.29    2.77
  -1  -6   8  139.82    2.27
   1   6  -8  143.25    3.03
  -1   6  -7  516.87    6.00
   1   7  -8    1.77    0.49
  -1   7  -7    0.82    0.45
   1   8  -8   27.09    1.10
   1   8  -8   26.95    1.49
  -1   8  -7  386.32    5.61
   1   9  -8   28.98    1.61
  -1   9  -7   11.06    1.10
   1  10  -8   84.86    2.81
  -1  10  -7  182.91    4.17
   1  11  -8   46.56    2.19
  -1  11  -7    1.32    0.59
   1  12  -8  132.86    3.78
  -1  12  -7    0.47    0.44
   1  13  -8   84.65    3.14
  -1  13  -7    4.25    0.94
   1  14  -8   17.02    1.53
  -1  14  -7   17.43    1.54
   1  15  -8   38.14    2.30
  -1  15  -7    0.85    0.64
   1  16  -8    2.45    0.90
  -1  16  -7  173.34    4.95
   1  17  -8   11.35    1.58
  -1  17  -7    2.14    0.87
   1  18  -8    7.65    1.38
  -1  18  -7   43.90    2.71
   1  19  -8    1.64    0.86
  -1  19  -7    0.19    0.60
   1  20  -8   22.38    2.11
  -1  20  -7    6.56    1.38
   1  21  -8   19.41    2.04
  -1  21  -7    0.21    0.71
   1  22  -8    8.03    1.60
  -1  22  -7    2.80    1.14
   1  23  -8    2.83    1.22
  -1  23  -7    0.23    0.80
   1  24  -8    3.09    1.28
  -1  24  -7   10.99    1.88
  -3  22   9    8.79    1.78
   3  21   6   21.83    2.28
  -3  21   9    1.42    1.11
   3  20   6   22.77    2.28
  -3  20   9   -0.94    0.72
   3  19   6   19.31    2.08
  -3  19   9   25.35    2.27
   3  18   6    4.01    1.24
  -3  18   9   -0.14    0.74
   3  17   6    6.05    1.36
  -3  17   9   83.38    3.71
   3  16   6    0.13    0.73
  -3  16   9    9.02    1.52
   3  15   6   22.89    1.98
  -3  15   9   41.94    2.56
   3  14   6    8.05    1.39
  -3  14   9   12.56    1.48
   3  13   6   87.06    3.47
  -3  13   9   24.76    1.92
   3  12   6    4.12    1.04
  -3  12   9   11.06    1.35
   3  11   6   78.46    3.11
  -3  11   9   67.16    2.90
   3  10   6    2.43    0.85
  -3  10   9   12.83    1.36
   3   9   6   63.26    2.65
  -3   9   9  171.78    4.36
   3   8   6    0.58    0.54
  -3   8   9    2.49    0.75
   3  -8  -9    0.62    0.99
   3   7   6    3.21    0.80
  -3   7   9  140.92    3.78
   3  -7  -9   94.77    2.90
   3   6   6   83.57    2.75
  -3   6   9    8.66    1.14
   3  -6  -9    6.00    1.25
  -3  -6  -6   59.38    2.47
   3   5   6  112.77    3.09
  -3   5   9   65.45    2.52
   3  -5  -9   39.35    1.90
  -3  -5  -6  104.56    2.82
  -3  -5  -6   73.50    2.62
   3   4   6  166.28    3.61
  -3   4   9    0.20    0.47
   3  -4  -9   -0.08    0.76
  -3  -4  -6  140.52    3.22
  -3  -4  -6   96.99    2.85
   3   3   6  114.93    2.90
  -3   3   9   62.19    2.37
   3  -3  -9   41.11    1.83
  -3  -3  -6   97.07    2.68
  -3  -3  -6   70.39    2.40
   3   2   6  142.04    3.10
  -3   2   9    2.88    0.73
   3  -2  -9    2.15    0.80
  -3  -2  -6  111.52    2.87
  -3  -2  -6   82.62    2.51
   3   1   6   23.70    1.30
  -3   1   9  257.69    4.56
   3  -1  -9  199.02    3.64
  -3  -1  -6   18.77    1.31
  -3  -1  -6   13.94    1.25
   3   0   6    0.14    0.35
  -3   0   9   49.89    2.04
   3   0  -9   39.68    1.71
  -3   0  -6    0.72    0.56
  -3   0  -6   -0.50    0.63
   3  -1   6   24.87    1.22
  -3  -1   9  250.39    4.38
   3   1  -9  222.25    3.87
  -3   1  -6   17.83    1.34
  -3   1  -6   16.88    1.25
   3  -2   6  143.38    2.60
  -3  -2   9    2.77    0.69
   3   2  -9    3.04    0.74
  -3   2  -6  100.08    2.85
  -3   2  -6  110.38    2.76
  -3  -3   9   56.76    2.09
   3   3  -9   52.93    2.00
  -3   3  -6   87.38    2.73
  -3   3  -6   97.64    2.63
  -3  -4   9   -0.03    0.39
   3   4  -9   -0.71    0.33
  -3   4  -6  126.16    3.30
  -3   4  -6  134.79    3.09
  -3  -5   9   63.51    2.20
  -3   5  -6   91.73    2.89
  -3   5  -6   99.52    2.73
  -3  -6   9    6.28    0.89
   3   6  -9    7.85    0.87
  -3   6  -6   67.18    2.55
  -3   6  -6   77.07    2.48
  -3  -7   9  139.59    3.24
   3   7  -9  136.96    3.41
  -3   7  -6    2.44    0.76
  -3   7  -6    2.65    0.82
   3   8  -9    1.82    0.58
   3   8  -9    2.53    0.58
  -3   8  -6    0.72    0.57
   3   9  -9  176.34    3.77
   3   9  -9  167.03    4.05
   3   9  -9  165.65    3.60
  -3   9  -6   58.08    2.56
   3  10  -9   12.21    1.13
   3  10  -9    8.90    1.15
   3  10  -9   10.61    0.98
  -3  10  -6    1.55    0.70
   3  11  -9   66.80    2.42
   3  11  -9   63.93    2.72
  -3  11  -6   81.63    3.17
   3  12  -9   10.40    1.24
  -3  12  -6    4.28    1.00
   3  13  -9   22.37    1.78
  -3  13  -6   88.12    3.46
   3  14  -9   13.86    1.49
  -3  14  -6    7.32    1.29
   3  15  -9   39.44    2.45
  -3  15  -6   20.47    1.86
   3  16  -9    6.64    1.23
  -3  16  -6   -0.06    0.56
   3  17  -9   81.70    3.68
  -3  17  -6    5.90    1.31
   3  18  -9   -0.20    0.53
  -3  18  -6    2.19    1.01
   3  19  -9   21.65    2.09
  -3  19  -6   18.00    1.96
   3  20  -9    0.49    0.73
  -3  20  -6   19.61    2.08
   3  21  -9    2.44    1.07
  -3  21  -6   22.11    2.26
   3  22  -9    7.15    1.61
  -3  22  -6   10.73    1.92
   3  23  -9   22.08    2.39
  -3  23  -6    4.79    1.47
  -5  20  10   40.96    3.15
  -5  19  10    8.73    1.82
   5  18   5    0.13    0.86
  -5  18  10    8.99    1.83
   5  17   5   43.64    3.04
  -5  17  10    4.16    1.39
   5  16   5    2.93    1.18
  -5  16  10    0.39    0.95
   5  15   5   19.48    2.04
  -5  15  10    2.80    1.16
   5  14   5    1.19    0.89
  -5  14  10   45.67    2.87
   5  13   5    7.27    1.46
  -5  13  10   15.28    1.79
   5  12   5   -0.42    0.69
  -5  12  10   68.14    3.32
   5  11   5   18.43    1.82
  -5  11  10   43.90    2.66
   5  10   5    0.21    0.73
  -5  10  10   12.78    1.69
   5   9   5  149.73    4.52
  -5   9  10   18.47    1.76
   5   8   5    3.18    0.98
  -5   8  10    0.24    0.60
   5   7   5   89.59    3.37
  -5   7  10    5.86    1.17
   5   6   5   19.49    1.64
  -5   6  10   29.87    2.06
   5   5   5    0.54    0.68
  -5   5  10   40.83    2.33
  -5  -5  -5    0.04    0.66
   5   4   5    1.21    0.72
  -5   4  10  113.53    3.76
  -5  -4  -5    1.35    0.86
   5   3   5   32.47    1.93
  -5   3  10  115.55    3.77
  -5  -3  -5   25.23    1.83
   5   2   5   12.95    1.29
  -5   2  10   88.10    3.27
  -5  -2  -5    7.58    1.28
   5   1   5  106.50    3.17
  -5   1  10    9.37    1.31
  -5  -1  -5   78.62    3.05
   5   0   5    4.73    0.93
  -5   0  10    0.04    0.56
  -5   0  -5    3.63    1.07
   5  -1   5  109.08    3.08
  -5  -1  10    9.59    1.30
  -5   1  -5   83.16    3.17
   5  -2   5   11.78    1.19
  -5  -2  10   88.74    3.22
  -5   2  -5    8.52    1.35
  -5  -3  10  110.64    3.58
  -5   3  -5   21.67    1.84
  -5  -4  10  111.89    3.60
  -5   4  -5    1.85    0.97
  -5  -5  10   42.39    2.26
  -5   5  -5    0.69    0.85
  -5  -6  10   29.87    1.93
  -5   6  -5   15.45    1.72
  -5  -7  10    4.18    0.98
  -5   7  -5   63.13    3.01
   5   8 -10   -0.54    0.57
   5   8 -10    0.58    0.58
  -5   8  -5    1.82    0.97
   5   9 -10   17.69    1.61
   5   9 -10   17.36    1.57
  -5   9  -5  105.05    3.90
   5  10 -10   11.04    1.36
   5  10 -10   10.56    1.28
  -5  10  -5    0.52    0.85
   5  11 -10   44.29    2.47
   5  11 -10   41.97    2.40
  -5  11  -5   14.14    1.71
   5  12 -10   66.64    3.02
   5  12 -10   58.59    2.98
  -5  12  -5   -0.15    0.71
   5  13 -10   16.20    1.66
   5  13 -10   13.99    1.59
  -5  13  -5    4.67    1.24
   5  14 -10   44.47    2.75
  -5  14  -5    0.95    0.93
   5  15 -10    2.30    0.93
  -5  15  -5   14.89    1.95
   5  16 -10    0.05    0.59
  -5  16  -5    1.54    1.02
   5  17 -10    2.24    0.99
  -5  17  -5   29.86    2.50
   5  18 -10    5.82    1.40
  -5  18  -5    0.48    0.90
   5  19 -10    6.29    1.48
  -5  19  -5    3.47    1.30
   5  20 -10   30.30    2.69
  -5  20  -5   -0.09    0.77
  -7  14  11   10.50    1.89
   7  13   4    5.34    1.50
  -7  13  11    0.63    0.97
   7  12   4   21.24    2.24
  -7  12  11    0.30    0.91
   7  11   4   15.56    1.93
  -7  11  11    7.21    1.58
   7  10   4   19.93    2.08
  -7  10  11   25.65    2.33
   7   9   4    2.44    1.13
  -7   9  11    1.57    0.98
   7   8   4    3.33    1.22
  -7   8  11   59.04    3.31
   7   7   4    2.07    1.07
  -7   7  11    1.43    0.92
   7   6   4   18.41    1.92
  -7   6  11   42.08    2.76
   7   5   4    8.55    1.56
  -7   5  11    2.08    0.98
   7   4   4   47.25    2.76
  -7   4  11    0.81    0.73
  -7  -4  -4   34.21    2.48
   7   3   4   16.15    1.74
  -7   3  11    1.51    0.87
  -7  -3  -4   11.56    1.74
   7   2   4   26.06    2.06
  -7   2  11   37.98    2.58
  -7  -2  -4   20.59    2.04
   7   1   4    0.78    0.86
  -7   1  11   25.51    2.14
  -7  -1  -4    0.40    0.90
  -7   0  11  133.06    4.67
  -7   0  -4   -0.28    0.81
  -7  -1  11   25.88    2.17
  -7   1  -4   -0.07    0.86
  -7  -2  11   35.17    2.47
  -7   2  -4   17.56    1.93
  -7  -3  11    0.94    0.77
  -7   3  -4   10.81    1.76
  -7  -4  11   -0.44    0.55
  -7   4  -4   30.05    2.45
  -7  -5  11    1.32    0.86
  -7   5  -4    3.71    1.29
  -7  -6  11   39.19    2.62
  -7   6  -4   10.96    1.79
   7   7 -11    0.99    0.88
   7   7 -11    2.84    1.03
  -7   7  -4    0.65    1.01
   7   8 -11   56.54    3.21
   7   8 -11   54.48    3.10
  -7   8  -4    1.89    1.24
   7   9 -11    2.29    1.07
   7   9 -11    2.31    1.01
  -7   9  -4    0.53    1.01
   7  10 -11   27.60    2.40
   7  10 -11   26.07    2.26
  -7  10  -4   14.33    2.09
   7  11 -11    6.61    1.57
  -7  11  -4    8.61    1.81
   7  12 -11    0.76    0.93
  -7  12  -4   12.94    2.08
   7  13 -11    0.43    0.96
  -7  13  -4    3.21    1.49
   7  14 -11    8.66    1.76
  -7  14  -4    8.33    1.87
   7  15 -11   -0.31    0.61
  -7  15  -4    0.48    1.18
   9   5   3    1.53    1.22
   9   4   3    0.22    1.06
  -9  -2  -3    3.95    1.35
  -9  -1  -3    0.19    0.87
  -9   0  -3    9.69    1.83
  -9   1  -3    0.28    0.94
  -9   2  -3    2.32    1.21
  -9   3  -3    1.80    1.20
  -9   4  -3    0.29    0.97
  -9   5  -3    1.71    1.20
   0  23   8    1.28    1.10
   0  22   8   17.25    2.26
   0  21   8    0.74    1.01
   0  20   8    0.61    0.87
   0  19   8    3.25    1.13
   0  18   8    6.50    1.37
   0  17   8   20.49    1.91
   0  16   8   81.09    3.47
   0  15   8    7.16    1.27
   0  14   8   48.59    2.58
   0  13   8    2.88    0.87
   0  12   8   46.33    2.36
   0  11   8   22.64    1.64
   0  10   8  153.02    3.94
   0   9   8   23.33    1.57
   0  -9  -8   13.55    1.53
   0   8   8   78.56    2.68
   0  -8  -8   50.62    2.34
   0   7   8    6.17    0.91
   0  -7  -8    6.18    1.29
   0   6   8  118.92    3.05
   0  -6  -8   69.20    2.52
   0   5   8   79.12    2.42
   0  -5  -8   41.46    1.96
   0   4   8  241.26    4.02
   0  -4  -8  137.69    3.28
   0   3   8   77.12    2.22
   0  -3  -8   45.12    1.95
   0   2   8  474.77    5.16
   0  -2  -8  304.01    4.66
   0   1   8   96.84    2.24
   0  -1  -8   70.86    2.30
   0   0   8  299.35    3.68
   0   0  -8  293.46    3.05
   0   0  -8  218.84    3.91
   0  -1   8   94.07    1.97
   0   1  -8   99.10    1.91
   0   1  -8   73.47    2.31
   0  -2   8  448.39    4.04
   0   2  -8  482.19    4.53
   0   2  -8  383.14    5.20
   0  -3   8   73.42    1.57
   0   3  -8   77.10    1.94
   0   3  -8   62.12    2.19
   0  -4   8  229.77    2.53
   0   4  -8  245.59    3.65
   0   4  -8  203.06    3.93
   0  -5   8   72.26    1.31
   0   5  -8   77.83    2.19
   0   6  -8  120.84    2.85
   0   7  -8    7.98    0.87
   0   8  -8   76.77    2.49
   0   9  -8   20.52    1.41
   0  10  -8  143.77    3.68
   0  11  -8   22.79    1.60
   0  12  -8   43.58    2.23
   0  13  -8    3.13    0.87
   0  14  -8   48.75    2.52
   0  15  -8    7.27    1.23
   0  16  -8   76.67    3.34
   0  17  -8   19.03    1.82
   0  18  -8    6.29    1.32
   0  19  -8    3.36    1.12
   0  20  -8    0.11    0.65
   0  21  -8   -0.38    0.66
   0  22  -8   12.45    1.89
   0  23  -8    2.09    1.14
   0  24  -8   19.90    2.27
  -2  23   9    1.39    1.16
   2  22   7   11.47    1.97
  -2  22   9    5.30    1.51
   2  21   7   33.68    2.73
  -2  21   9   20.72    2.20
   2  20   7   12.96    1.94
  -2  20   9   38.29    2.77
   2  19   7   34.43    2.58
  -2  19   9    5.78    1.38
   2  18   7   -0.06    0.73
  -2  18   9    7.15    1.46
   2  17   7    4.19    1.21
  -2  17   9    2.39    1.07
   2  16   7    0.30    0.71
  -2  16   9   25.72    2.08
   2  15   7   46.83    2.67
  -2  15   9   15.72    1.66
   2  14   7   19.84    1.77
  -2  14   9   65.36    3.02
   2  13   7   72.37    3.09
  -2  13   9   23.39    1.85
   2  12   7   10.41    1.28
  -2  12   9  198.63    4.91
   2  11   7   71.60    2.90
  -2  11   9    1.26    0.69
   2  10   7   14.19    1.36
  -2  10   9  115.97    3.59
   2   9   7    8.96    1.09
  -2   9   9   22.58    1.63
   2  -9  -9   14.87    1.63
   2   8   7   12.57    1.23
  -2   8   9    4.08    0.88
   2  -8  -9    5.39    1.34
  -2  -8  -7   11.17    1.70
   2   7   7   14.47    1.26
  -2   7   9    5.86    0.97
   2  -7  -9    6.40    1.34
  -2  -7  -7   10.52    1.67
   2   6   7   20.26    1.39
  -2   6   9   46.36    2.08
   2  -6  -9   30.32    1.82
  -2  -6  -7   11.52    1.40
   2   5   7  148.93    3.39
  -2   5   9   78.60    2.60
   2  -5  -9   48.67    2.13
  -2  -5  -7   84.94    2.79
   2   4   7   15.82    1.15
  -2   4   9  187.16    3.86
   2  -4  -9  116.10    3.02
  -2  -4  -7   13.88    1.04
  -2  -4  -7    7.84    1.28
   2   3   7  522.31    5.82
  -2   3   9   25.92    1.49
   2  -3  -9   18.84    1.39
  -2  -3  -7  416.39    4.74
  -2  -3  -7  305.09    4.82
   2   2   7    2.83    0.60
  -2   2   9  232.01    4.08
   2  -2  -9  155.74    3.35
  -2  -2  -7    2.08    0.59
  -2  -2  -7    0.95    0.71
   2   1   7   56.60    1.78
  -2   1   9   -0.20    0.35
   2  -1  -9   -0.30    0.47
  -2  -1  -7   42.09    1.61
  -2  -1  -7   36.44    1.76
   2   0   7    0.68    0.38
  -2   0   9    0.29    0.40
   2   0  -9    0.29    0.21
   2   0  -9   -0.04    0.47
  -2   0  -7   -0.26    0.40
  -2   0  -7    0.19    0.57
   2  -1   7   54.60    1.56
  -2  -1   9    0.40    0.37
   2   1  -9    0.13    0.22
   2   1  -9   -0.67    0.33
  -2   1  -7   37.65    1.60
  -2   1  -7   41.15    1.79
   2  -2   7    1.41    0.37
  -2  -2   9  221.19    3.67
   2   2  -9  233.77    3.24
   2   2  -9  195.65    3.77
  -2   2  -7    2.88    0.66
  -2   2  -7    1.63    0.70
  -2  -3   9   27.89    1.35
   2   3  -9   27.43    1.21
   2   3  -9   23.33    1.41
  -2   3  -7  426.43    5.37
  -2   3  -7  425.76    5.53
  -2  -4   9  180.51    3.23
   2   4  -9  184.79    3.26
   2   4  -9  165.89    3.60
  -2   4  -7   14.82    1.16
  -2   4  -7   12.89    1.19
  -2  -5   9   76.58    2.12
   2   5  -9   80.49    2.28
  -2   5  -7  140.31    3.30
  -2   5  -7  132.97    3.23
  -2  -6   9   42.96    1.60
   2   6  -9   44.99    1.81
  -2   6  -7   18.54    1.32
  -2   6  -7   16.71    1.35
  -2  -7   9    4.77    0.69
   2   7  -9    5.26    0.76
  -2   7  -7   14.11    1.22
   2   8  -9    4.17    0.73
   2   8  -9    2.24    0.50
  -2   8  -7   11.98    1.16
   2   9  -9   23.00    1.26
   2   9  -9   22.65    1.49
   2   9  -9   20.17    1.14
  -2   9  -7    7.79    1.08
   2  10  -9  111.50    3.33
  -2  10  -7   15.09    1.37
   2  11  -9    1.25    0.57
  -2  11  -7   68.20    2.79
   2  12  -9  177.61    4.51
  -2  12  -7   10.20    1.23
   2  13  -9   20.51    1.66
  -2  13  -7   70.34    3.01
   2  14  -9   61.20    2.86
  -2  14  -7   22.42    1.84
   2  15  -9   13.48    1.48
  -2  15  -7   45.38    2.60
  -2  16  -7   -0.20    0.54
   2  17  -9    1.43    0.79
  -2  17  -7    2.14    0.89
   2  18  -9    6.25    1.32
  -2  18  -7    0.73    0.69
   2  19  -9    5.98    1.33
  -2  19  -7   33.43    2.50
  -2  20  -7    8.55    1.55
   2  21  -9   19.16    2.09
  -2  21  -7   31.14    2.57
   2  22  -9    7.86    1.65
  -2  22  -7    6.94    1.56
   2  23  -9    0.56    0.89
  -2  23  -7    8.40    1.71
  -4  21  10    0.30    1.00
   4  20   6   -0.64    0.76
  -4  20  10    0.47    0.99
   4  19   6    4.82    1.41
  -4  19  10   13.46    2.02
   4  18   6   10.33    1.83
  -4  18  10    1.86    1.05
   4  17   6   26.69    2.35
  -4  17  10   38.30    2.71
   4  16   6   30.73    2.43
  -4  16  10    5.72    1.33
   4  15   6   35.83    2.55
  -4  15  10   53.60    3.03
   4  14   6   19.08    1.90
  -4  14  10    0.35    0.74
   4  13   6    1.20    0.89
  -4  13  10   15.82    1.71
   4  12   6   12.99    1.55
  -4  12  10    3.22    1.00
   4  11   6   57.60    2.86
  -4  11  10   51.46    2.74
   4  10   6   43.97    2.45
  -4  10  10    3.97    1.07
   4   9   6   40.40    2.29
  -4   9  10  147.04    4.36
   4   8   6   23.56    1.76
  -4   8  10   18.64    1.65
   4   7   6  105.66    3.43
  -4   7  10  142.18    4.13
   4  -7 -10   99.20    3.01
   4   6   6   13.61    1.34
  -4   6  10    6.96    1.15
   4  -6 -10    5.87    1.30
   4   5   6   11.90    1.21
  -4   5  10    6.46    1.10
   4  -5 -10    6.98    1.31
  -4  -5  -6   10.07    1.16
  -4  -5  -6    8.28    1.51
   4   4   6    0.57    0.55
  -4   4  10    9.41    1.24
   4  -4 -10    5.36    1.19
  -4  -4  -6    0.65    0.66
  -4  -4  -6   -0.56    1.01
   4   3   6    2.06    0.71
  -4   3  10   81.99    2.97
   4  -3 -10   54.79    2.16
  -4  -3  -6    1.67    0.75
  -4  -3  -6    1.74    1.08
   4   2   6   25.91    1.55
  -4   2  10   50.13    2.33
   4  -2 -10   35.44    1.78
  -4  -2  -6   18.83    1.51
  -4  -2  -6   14.25    1.43
   4   1   6  112.59    2.97
  -4   1  10   95.87    3.12
   4  -1 -10   68.47    2.31
  -4  -1  -6   82.57    2.84
  -4  -1  -6   67.21    2.41
   4   0   6    5.64    0.89
  -4   0  10    6.58    1.06
   4   0 -10    4.72    0.97
  -4   0  -6    3.26    0.95
  -4   0  -6    2.95    1.07
   4  -1   6  114.55    2.81
  -4  -1  10   93.85    3.04
   4   1 -10   82.85    2.51
  -4   1  -6   79.65    2.86
  -4   1  -6   77.80    2.46
   4  -2   6   24.06    1.34
  -4  -2  10   51.83    2.28
   4   2 -10   41.68    1.85
  -4   2  -6   16.55    1.53
  -4   2  -6   18.60    1.37
  -4  -3  10   82.69    2.83
   4   3 -10   78.25    2.52
  -4   3  -6    1.70    0.81
  -4   3  -6    0.78    0.72
  -4  -4  10    7.84    1.10
   4   4 -10    8.85    1.17
  -4   4  -6    0.25    0.66
  -4   4  -6    0.86    0.72
  -4  -5  10    8.24    1.03
   4   5 -10    5.94    1.04
  -4   5  -6    6.05    1.13
  -4   5  -6    9.53    1.10
  -4  -6  10    6.58    1.02
  -4   6  -6   12.34    1.42
  -4   6  -6   11.38    1.20
  -4  -7  10  139.78    3.68
  -4   7  -6   80.47    3.12
  -4   7  -6   94.62    2.85
  -4  -8  10   19.37    1.49
  -4   8  -6   16.31    1.58
  -4   8  -6   18.45    1.47
   4   9 -10  136.12    3.90
   4   9 -10  135.65    3.71
  -4   9  -6   29.83    2.07
  -4   9  -6   38.03    2.04
   4  10 -10    2.76    0.86
   4  10 -10    2.53    0.77
   4  10 -10    2.47    0.75
  -4  10  -6   38.30    2.38
   4  11 -10   49.68    2.38
   4  11 -10   46.69    2.47
  -4  11  -6   47.32    2.64
   4  12 -10    3.42    0.90
  -4  12  -6    8.61    1.42
   4  13 -10   15.73    1.60
  -4  13  -6   -0.06    0.59
   4  14 -10    0.78    0.63
  -4  14  -6   15.55    1.71
   4  15 -10   48.35    2.82
  -4  15  -6   32.00    2.41
   4  16 -10    6.02    1.26
  -4  16  -6   25.77    2.24
   4  17 -10   33.70    2.51
  -4  17  -6   20.42    2.08
   4  18 -10    2.22    0.97
  -4  18  -6    8.11    1.62
   4  19 -10   11.53    1.78
  -4  19  -6    7.53    1.63
   4  20 -10    0.04    0.67
  -4  20  -6   -0.58    0.69
   4  21 -10    1.19    0.95
  -4  21  -6    0.36    0.95
  -6  17  11    0.17    0.90
   6  16   5    1.46    1.11
  -6  16  11    4.07    1.40
   6  15   5    0.49    0.93
  -6  15  11   13.89    2.09
   6  14   5   22.15    2.24
  -6  14  11   13.36    2.00
   6  13   5    0.69    0.96
  -6  13  11   41.36    2.86
   6  12   5   38.22    2.70
  -6  12  11   16.11    1.87
   6  11   5    0.14    0.78
  -6  11  11   36.56    2.62
   6  10   5   27.79    2.29
  -6  10  11    2.45    1.06
   6   9   5    0.65    0.84
  -6   9  11    6.82    1.38
   6   8   5    1.15    0.85
  -6   8  11    5.13    1.22
   6   7   5    4.68    1.19
  -6   7  11   61.52    3.16
   6   6   5   25.36    2.02
  -6   6  11   28.91    2.21
   6   5   5    2.05    0.92
  -6   5  11   33.58    2.34
   6   4   5  107.04    3.73
  -6   4  11   17.80    1.75
  -6  -4  -5   86.45    3.53
   6   3   5    2.20    0.89
  -6   3  11   33.51    2.29
  -6  -3  -5   -0.34    0.79
   6   2   5  112.90    3.69
  -6   2  11    5.05    1.18
  -6  -2  -5   78.32    3.37
   6   1   5    0.86    0.75
  -6   1  11   24.18    1.96
  -6  -1  -5   -0.27    0.83
   6   0   5    0.54    0.68
  -6   0  11    0.53    0.66
  -6   0  -5   -0.46    0.73
  -6  -1  11   20.22    1.79
  -6   1  -5    0.75    0.93
  -6  -2  11    6.22    1.25
  -6   2  -5   79.94    3.46
  -6  -3  11   31.81    2.17
  -6   3  -5    0.07    0.83
  -6  -4  11   16.97    1.66
  -6   4  -5   70.96    3.32
  -6  -5  11   33.46    2.23
  -6   5  -5    0.63    0.98
  -6  -6  11   27.89    2.06
  -6   6  -5   19.22    1.98
  -6  -7  11   68.64    3.17
  -6   7  -5    2.59    1.20
   6   8 -11    2.81    0.97
  -6   8  -5    0.51    0.96
   6   9 -11    2.85    1.02
   6   9 -11    4.89    1.15
  -6   9  -5    0.49    1.01
   6  10 -11    3.01    1.08
   6  10 -11    2.51    0.93
  -6  10  -5   15.90    1.95
   6  11 -11   40.43    2.61
   6  11 -11   38.33    2.49
  -6  11  -5    0.29    0.97
   6  12 -11   16.71    1.81
  -6  12  -5   25.85    2.38
   6  13 -11   42.96    2.77
  -6  13  -5    0.29    0.86
   6  14 -11    6.74    1.35
  -6  14  -5   12.56    1.98
   6  15 -11   10.01    1.65
  -6  15  -5    0.17    0.96
   6  16 -11    4.30    1.26
  -6  16  -5    0.16    1.04
   6  17 -11    0.09    0.67
  -6  17  -5   -0.17    0.93
  -6  18  -5    7.13    1.78
   8  10   4    9.46    1.88
   8   9   4   12.67    2.07
   8   8   4    5.87    1.55
  -8   8  12   45.47    3.19
   8   7   4   11.84    1.97
  -8   7  12    0.78    0.95
   8   6   4    2.01    1.23
  -8   6  12   15.77    1.96
   8   5   4    6.26    1.59
  -8   5  12    4.33    1.33
   8   4   4    4.09    1.36
  -8   4  12    0.68    0.84
   8   3   4    0.37    0.97
  -8   3  12    1.02    0.87
  -8  -3  -4   -0.13    0.72
  -8   2  12   24.70    2.31
  -8  -2  -4    8.78    1.68
  -8   1  12    2.52    1.13
  -8  -1  -4    8.11    1.66
  -8   0  12   46.03    3.07
  -8   0  -4   10.22    1.79
  -8  -1  12    3.10    1.11
  -8   1  -4    8.45    1.64
  -8  -2  12   24.46    2.30
  -8   2  -4    6.45    1.56
  -8  -3  12    2.08    1.02
  -8   3  -4    0.14    0.84
  -8  -4  12    0.02    0.81
  -8   4  -4    2.98    1.20
  -8  -5  12    3.17    1.20
  -8   5  -4    4.16    1.34
   8   6 -12   16.73    2.00
  -8   6  -4    2.40    1.24
   8   7 -12    0.84    0.96
   8   7 -12    0.58    0.82
  -8   7  -4    8.92    1.82
   8   8 -12   47.36    3.25
   8   8 -12   45.34    3.11
  -8   8  -4    4.28    1.45
   8   9 -12   -0.49    0.88
   8   9 -12    0.25    0.84
  -8   9  -4    7.84    1.76
   8  10 -12   17.78    2.20
   8  10 -12   18.52    2.14
  -8  10  -4    7.27    1.75
  -8  11  -4    8.72    1.92
  -1  23   9    3.13    1.30
   1  22   8    1.74    1.09
  -1  22   9    7.79    1.69
   1  21   8   39.56    2.90
  -1  21   9    1.52    1.10
   1  20   8   -0.14    0.70
  -1  20   9    2.79    1.18
   1  19   8   26.32    2.30
  -1  19   9   19.38    2.01
   1  18   8   -0.06    0.71
  -1  18   9   35.70    2.55
   1  17   8   -0.40    0.63
  -1  17   9   78.83    3.59
   1  16   8    6.42    1.32
  -1  16   9   24.06    2.04
   1  15   8   35.11    2.31
  -1  15   9   43.66    2.59
   1  14   8    1.30    0.77
  -1  14   9   37.44    2.33
   1  13   8   91.60    3.44
  -1  13   9    3.83    1.00
   1  12   8    4.61    0.98
  -1  12   9    5.96    1.13
   1  11   8   93.36    3.26
  -1  11   9   31.40    1.96
   1  10   8    2.60    0.81
  -1  10   9   36.98    2.05
   1   9   8    7.26    1.07
  -1   9   9  208.18    4.60
   1  -9  -9  136.57    3.82
  -1  -9  -8    5.63    1.50
   1   8   8    4.97    0.94
  -1   8   9   78.07    2.77
   1  -8  -9   52.52    2.44
  -1  -8  -8    4.65    1.40
   1   7   8   78.49    2.66
  -1   7   9  110.50    3.17
   1  -7  -9   66.27    2.63
  -1  -7  -8   43.63    2.26
   1   6   8   21.36    1.43
  -1   6   9   79.07    2.61
   1  -6  -9   49.63    2.27
  -1  -6  -8   13.33    1.43
   1   5   8  425.69    5.64
  -1   5   9   -0.04    0.40
   1  -5  -9    0.01    0.81
  -1  -5  -8  234.90    4.48
   1   4   8   30.77    1.53
  -1   4   9   31.28    1.60
   1  -4  -9   19.34    1.46
  -1  -4  -8   29.78    1.11
  -1  -4  -8   15.90    1.38
   1   3   8  171.99    3.31
  -1   3   9    0.06    0.38
   1  -3  -9    0.36    0.65
  -1  -3  -8  142.61    2.31
  -1  -3  -8  104.40    2.94
   1   2   8   33.60    1.45
  -1   2   9  136.83    2.98
   1  -2  -9   91.92    2.69
  -1  -2  -8   24.77    1.06
  -1  -2  -8   21.39    1.43
   1   1   8    0.33    0.35
  -1   1   9   20.20    1.18
   1  -1  -9   15.39    1.22
  -1  -1  -8    0.09    0.33
  -1  -1  -8   -0.15    0.57
   1   0   8   -0.07    0.28
  -1   0   9  112.30    2.53
   1   0  -9   86.33    2.57
  -1   0  -8   -0.01    0.32
  -1   0  -8   -0.28    0.51
   1  -1   8   -0.06    0.27
  -1  -1   9   20.04    1.12
   1   1  -9   22.13    0.91
   1   1  -9   15.43    1.19
  -1   1  -8    0.89    0.39
  -1   1  -8   -0.16    0.51
  -1  -2   9  131.54    2.56
   1   2  -9  143.20    2.44
   1   2  -9  112.96    2.95
  -1   2  -8   30.37    1.35
  -1   2  -8   27.33    1.54
  -1  -3   9    0.61    0.34
   1   3  -9    0.15    0.23
   1   3  -9    0.46    0.49
  -1   3  -8  165.08    3.11
  -1   3  -8  144.12    3.35
  -1  -4   9   29.34    1.18
   1   4  -9   32.64    1.36
   1   4  -9   30.06    1.63
  -1   4  -8   31.23    1.47
  -1   4  -8   24.72    1.53
  -1  -5   9    0.32    0.30
   1   5  -9    0.59    0.34
   1   5  -9    1.38    0.64
  -1   5  -8  425.34    5.40
  -1   5  -8  359.87    5.42
  -1  -6   9   77.41    1.78
   1   6  -9   81.52    2.37
  -1   6  -8   22.23    1.37
   1   7  -9  113.54    2.93
  -1   7  -8   77.79    2.52
   1   8  -9   81.37    2.60
  -1   8  -8    4.35    0.79
   1   9  -9  201.78    4.24
  -1   9  -8    6.10    0.94
   1  10  -9   37.61    1.95
  -1  10  -8    1.78    0.63
   1  11  -9   30.93    1.86
  -1  11  -8   90.07    3.13
   1  12  -9    8.12    1.17
  -1  12  -8    4.80    0.96
   1  13  -9    5.02    1.01
  -1  13  -8   86.12    3.28
   1  14  -9   40.66    2.34
  -1  14  -8    0.76    0.62
   1  15  -9   42.12    2.47
  -1  15  -8   31.80    2.18
   1  16  -9   27.00    2.09
  -1  16  -8    5.83    1.22
   1  17  -9   75.39    3.47
  -1  17  -8    0.23    0.62
   1  18  -9   36.62    2.55
  -1  18  -8    0.41    0.66
   1  19  -9   15.44    1.80
  -1  19  -8   26.19    2.23
   1  20  -9    2.68    1.05
  -1  20  -8   -0.24    0.58
   1  21  -9    1.97    1.01
  -1  21  -8   34.63    2.70
   1  22  -9    6.82    1.55
  -1  22  -8    2.01    1.07
   1  23  -9    3.02    1.29
  -1  23  -8   12.86    2.05
   3  21   7    0.14    0.97
  -3  21  10    0.76    0.92
   3  20   7    1.15    1.05
  -3  20  10   42.01    2.96
   3  19   7   14.34    2.06
  -3  19  10   -0.27    0.77
   3  18   7   23.08    2.22
  -3  18  10   21.77    2.12
   3  17   7   18.20    1.94
  -3  17  10    1.31    0.89
   3  16   7   31.34    2.39
  -3  16  10   13.90    1.69
   3  15   7   23.18    2.04
  -3  15  10    0.80    0.85
   3  14   7   19.81    1.87
  -3  14  10   61.72    3.07
   3  13   7   10.93    1.57
  -3  13  10    1.03    0.76
   3  12   7    2.00    0.90
  -3  12  10   95.44    3.61
   3  11   7    2.62    0.93
  -3  11  10   16.15    1.57
   3  10   7   60.03    2.73
  -3  10  10   48.78    2.49
   3   9   7   24.28    1.76
  -3   9  10   12.08    1.33
   3   8   7  174.39    4.31
  -3   8  10    0.36    0.59
   3  -8 -10   -0.69    0.88
   3   7   7   33.26    1.90
  -3   7  10    4.12    0.90
   3  -7 -10    4.51    1.29
  -3  -7  -7   24.95    1.94
   3   6   7   27.51    1.69
  -3   6  10   96.56    3.19
   3  -6 -10   58.06    2.41
  -3  -6  -7   18.20    1.69
   3   5   7   28.67    1.67
  -3   5  10   -0.06    0.49
   3  -5 -10   -0.21    0.84
  -3  -5  -7   25.91    1.54
  -3  -5  -7   15.71    1.57
   3   4   7   17.77    1.33
  -3   4  10  189.36    4.27
   3  -4 -10  117.85    3.16
  -3  -4  -7   17.67    1.33
  -3  -4  -7   13.15    1.69
   3   3   7    0.34    0.44
  -3   3  10   10.35    1.15
   3  -3 -10    6.56    1.22
  -3  -3  -7    0.43    0.59
  -3  -3  -7   -0.12    0.94
   3   2   7   91.17    2.57
  -3   2  10  116.86    3.26
   3  -2 -10   80.89    2.57
  -3  -2  -7   71.58    2.40
  -3  -2  -7   53.67    2.24
   3   1   7  108.86    2.69
  -3   1  10   -0.08    0.41
   3  -1 -10   -0.57    0.55
  -3  -1  -7   79.13    2.53
  -3  -1  -7   67.01    2.42
   3   0   7   49.33    1.77
  -3   0  10    0.13    0.42
   3   0 -10   -0.18    0.55
  -3   0  -7   35.05    1.80
  -3   0  -7   31.81    1.75
   3  -1   7  107.84    2.45
  -3  -1  10    0.02    0.42
   3   1 -10   -0.15    0.48
  -3   1  -7   74.58    2.54
  -3   1  -7   75.65    2.49
   3  -2   7   90.76    2.14
  -3  -2  10  114.62    3.05
   3   2 -10  101.61    2.86
  -3   2  -7   67.92    2.46
  -3   2  -7   68.98    2.38
  -3  -3  10    8.51    0.97
   3   3 -10    9.01    1.04
  -3   3  -7    1.19    0.67
  -3   3  -7    0.89    0.72
  -3  -4  10  181.32    3.76
   3   4 -10  178.50    3.49
   3   4 -10  170.64    3.80
  -3   4  -7   14.01    1.31
  -3   4  -7   14.12    1.25
  -3  -5  10    0.31    0.44
   3   5 -10    0.02    0.26
   3   5 -10   -0.54    0.40
  -3   5  -7   19.68    1.51
  -3   5  -7   24.30    1.55
  -3  -6  10   91.37    2.67
   3   6 -10   93.27    2.76
  -3   6  -7   21.62    1.58
  -3   6  -7   22.59    1.54
  -3  -7  10    4.19    0.80
   3   7 -10    3.93    0.74
  -3   7  -7   27.83    1.79
  -3   7  -7   28.19    1.75
  -3  -8  10    0.19    0.50
   3   8 -10    0.46    0.45
  -3   8  -7  150.00    4.04
  -3   8  -7  168.77    4.01
   3   9 -10   11.08    1.15
   3   9 -10    9.98    0.99
  -3   9  -7   23.31    1.74
   3  10 -10   50.31    2.12
   3  10 -10   47.37    2.31
  -3  10  -7   60.60    2.75
   3  11 -10   13.31    1.36
  -3  11  -7    2.59    0.88
   3  12 -10   95.10    3.46
  -3  12  -7    2.26    0.82
   3  13 -10    2.05    0.79
  -3  13  -7   11.95    1.56
   3  14 -10   61.58    2.99
  -3  14  -7   16.38    1.68
   3  15 -10    1.81    0.82
  -3  15  -7   23.77    2.05
   3  16 -10   14.20    1.63
  -3  16  -7   29.73    2.31
   3  17 -10    1.80    0.82
  -3  17  -7   14.25    1.71
   3  18 -10   21.35    2.04
  -3  18  -7   21.72    2.12
   3  19 -10    0.19    0.63
  -3  19  -7   11.41    1.78
   3  20 -10   39.38    2.86
  -3  20  -7   -0.03    0.70
   3  21 -10    0.05    0.70
  -3  21  -7   -0.53    0.68
   3  22 -10   31.92    2.76
  -3  22  -7    4.40    1.43
   5  18   6    8.39    1.78
  -5  18  11    8.11    1.78
   5  17   6    0.71    0.93
  -5  17  11   15.72    2.20
   5  16   6    1.71    1.06
  -5  16  11    9.24    1.75
   5  15   6    4.75    1.40
  -5  15  11   40.24    2.84
   5  14   6   28.60    2.37
  -5  14  11    0.32    0.78
   5  13   6    0.44    0.83
  -5  13  11    2.30    1.08
   5  12   6   60.17    3.17
  -5  12  11    3.65    1.21
   5  11   6   28.09    2.20
  -5  11  11    5.84    1.30
   5  10   6   14.00    1.63
  -5  10  11   30.63    2.28
   5   9   6    7.68    1.39
  -5   9  11   51.04    2.82
   5   8   6   13.71    1.54
  -5   8  11  113.54    4.07
   5   7   6    3.17    0.98
  -5   7  11   70.57    3.19
   5   6   6   92.62    3.39
  -5   6  11   -0.71    0.45
   5   5   6   10.82    1.32
  -5   5  11    1.51    0.78
  -5  -5  -6    7.61    1.26
   5   4   6   42.67    2.25
  -5   4  11    4.94    1.06
  -5  -4  -6   38.55    2.25
   5   3   6    8.86    1.25
  -5   3  11   16.92    1.58
  -5  -3  -6    6.11    1.19
   5   2   6   31.54    1.88
  -5   2  11   22.63    1.79
  -5  -2  -6   26.14    1.91
   5   1   6    0.87    0.62
  -5   1  11  110.40    3.70
  -5  -1  -6    0.00    0.74
   5   0   6    0.78    0.61
  -5   0  11   64.08    2.83
  -5   0  -6    0.57    0.80
  -5  -1  11  105.38    3.59
  -5   1  -6    0.47    0.77
  -5  -2  11   23.15    1.76
  -5   2  -6   22.42    1.85
  -5  -3  11   18.68    1.60
  -5   3  -6    5.27    1.26
  -5  -4  11    3.43    0.93
  -5   4  -6   30.85    2.19
  -5  -5  11    2.15    0.78
  -5   5  -6    7.20    1.38
  -5  -6  11    0.01    0.55
  -5   6  -6   57.76    2.90
  -5  -7  11   65.28    2.85
  -5   7  -6    2.58    1.11
  -5  -8  11  111.82    3.73
   5   8 -11  102.69    3.57
  -5   8  -6   10.18    1.59
   5   9 -11   46.27    2.46
  -5   9  -6    5.76    1.32
   5  10 -11   31.54    2.13
   5  10 -11   31.07    2.09
  -5  10  -6   10.57    1.62
   5  11 -11    8.73    1.42
   5  11 -11    5.33    1.09
   5  11 -11    6.59    1.16
  -5  11  -6   22.33    2.04
   5  12 -11    3.54    1.05
   5  12 -11    4.02    1.05
  -5  12  -6   48.12    2.90
   5  13 -11    1.89    0.84
  -5  13  -6    1.66    1.04
   5  14 -11    1.25    0.75
  -5  14  -6   22.16    2.15
   5  15 -11   38.13    2.65
  -5  15  -6    3.58    1.27
   5  16 -11    8.60    1.54
  -5  16  -6    1.00    0.96
   5  17 -11   13.45    1.89
  -5  17  -6    2.00    1.14
   5  18 -11    9.15    1.70
  -5  18  -6    7.71    1.67
   5  19 -11   10.31    1.83
  -5  19  -6    0.32    0.92
   7  13   5    1.84    1.20
  -7  13  12   37.89    2.94
   7  12   5   -0.02    0.83
  -7  12  12    0.38    0.86
   7  11   5    7.82    1.67
  -7  11  12   24.39    2.37
   7  10   5    3.48    1.27
  -7  10  12    3.41    1.29
   7   9   5   33.96    2.61
  -7   9  12    6.09    1.44
   7   8   5    5.64    1.44
  -7   8  12    2.10    1.03
   7   7   5    9.34    1.68
  -7   7  12   26.76    2.31
   7   6   5   10.95    1.74
  -7   6  12    6.19    1.41
   7   5   5    6.81    1.45
  -7   5  12   49.64    3.03
   7   4   5    2.15    1.06
  -7   4  12    1.45    0.88
  -7  -4  -5    1.88    1.09
   7   3   5   32.39    2.34
  -7   3  12   44.51    2.84
  -7  -3  -5   25.19    2.21
   7   2   5    2.45    1.01
  -7   2  12   11.77    1.74
  -7  -2  -5    2.42    1.12
  -7   1  12   13.22    1.80
  -7  -1  -5   36.71    2.62
  -7   0  12    0.82    0.77
  -7   0  -5   11.05    1.74
  -7  -1  12   13.56    1.66
  -7   1  -5   41.37    2.77
  -7  -2  12   13.80    1.85
  -7   2  -5    2.19    1.14
  -7  -3  12   44.80    2.80
  -7   3  -5   19.37    2.06
  -7  -4  12    1.70    0.91
  -7   4  -5    2.97    1.25
  -7  -5  12   41.91    2.73
  -7   5  -5    5.11    1.40
  -7  -6  12    5.15    1.27
  -7   6  -5    7.93    1.67
   7   7 -12   28.44    2.31
  -7   7  -5    6.84    1.59
   7   8 -12    2.56    1.06
   7   8 -12    2.68    1.02
  -7   8  -5    2.51    1.28
   7   9 -12    6.48    1.49
   7   9 -12    4.84    1.33
  -7   9  -5   18.30    2.12
   7  10 -12    6.16    1.49
   7  10 -12    4.20    1.25
  -7  10  -5    3.07    1.35
   7  11 -12   24.19    2.29
   7  11 -12   27.63    2.35
  -7  11  -5    3.60    1.45
   7  12 -12    0.72    0.91
  -7  12  -5    0.93    1.19
   7  13 -12   41.02    2.96
  -7  13  -5    0.75    1.16
   7  14 -12    0.41    0.73
  -7  14  -5    1.78    1.35
   0  22   9    5.36    1.51
   0  21   9   18.36    2.15
   0  20   9    1.38    1.05
   0  19   9   26.71    2.31
   0  18   9    8.97    1.57
   0  17   9    3.62    1.13
   0  16   9    1.20    0.80
   0  15   9    5.13    1.19
   0  14   9    3.09    0.97
   0  13   9  132.96    4.15
   0  12   9   17.85    1.60
   0  11   9   63.42    2.75
   0  10   9   13.59    1.35
   0   9   9    2.12    0.73
   0  -9  -9    2.83    1.24
   0   8   9    0.60    0.54
   0  -8  -9    0.97    1.09
   0   7   9   23.34    1.57
   0  -7  -9   15.35    1.58
   0   6   9   30.38    1.70
   0  -6  -9   16.30    1.52
   0   5   9  394.86    5.55
   0  -5  -9  223.62    4.45
   0   4   9  137.90    3.20
   0  -4  -9   77.23    2.66
   0   3   9  158.89    3.29
   0  -3  -9   93.85    2.85
   0   2   9   49.34    1.81
   0  -2  -9   33.07    1.76
   0   1   9   76.42    2.11
   0  -1  -9   58.58    1.34
   0  -1  -9   53.76    2.15
   0   0   9    0.01    0.34
   0   0  -9    0.10    0.24
   0   0  -9   -0.20    0.54
   0  -1   9   75.16    1.89
   0   1  -9   78.08    1.79
   0   1  -9   55.66    2.17
   0  -2   9   46.30    1.43
   0   2  -9   48.85    1.53
   0   2  -9   38.04    1.82
   0  -3   9  143.94    2.32
   0   3  -9  153.06    2.82
   0   3  -9  122.83    3.20
   0  -4   9  129.39    2.07
   0   4  -9  139.24    2.86
   0   4  -9  116.24    3.16
   0   5  -9  398.01    5.07
   0   5  -9  329.00    5.35
   0   6  -9   30.67    1.53
   0   7  -9   24.03    1.44
   0   8  -9    1.22    0.53
   0   9  -9    1.98    0.62
   0  10  -9   13.12    1.26
   0  11  -9   60.96    2.59
   0  12  -9   16.52    1.46
   0  13  -9  128.76    3.97
   0  14  -9    4.05    0.98
   0  15  -9    6.09    1.21
   0  16  -9    1.24    0.76
   0  17  -9    3.29    1.02
   0  18  -9    7.33    1.41
   0  19  -9   25.08    2.21
   0  20  -9    3.59    1.20
   0  21  -9   15.52    1.92
   0  22  -9    4.93    1.45
   0  23  -9    3.66    1.34
  -2  22  10    0.34    0.94
   2  21   8    0.39    0.94
  -2  21  10    0.35    0.88
   2  20   8    2.75    1.23
  -2  20  10    0.13    0.88
   2  19   8    2.12    1.12
  -2  19  10    7.25    1.54
   2  18   8   49.29    3.02
  -2  18  10    3.89    1.23
   2  17   8    1.72    0.99
  -2  17  10   63.11    3.30
   2  16   8  103.41    4.09
  -2  16  10    1.39    0.89
   2  15   8    7.86    1.45
  -2  15  10   69.96    3.31
   2  14   8   21.99    1.91
  -2  14  10    0.43    0.75
   2  13   8    7.37    1.31
  -2  13  10    0.61    0.72
   2  12   8    8.87    1.35
  -2  12  10    1.34    0.78
   2  11   8    3.94    0.95
  -2  11  10   23.74    1.82
   2  10   8   67.43    2.81
  -2  10  10    2.44    0.80
   2   9   8   10.70    1.22
  -2   9  10  116.60    3.63
   2  -9 -10   82.16    3.08
   2   8   8   93.03    3.09
  -2   8  10   17.87    1.48
   2  -8 -10   14.70    1.87
  -2  -8  -8   59.02    2.72
   2   7   8   10.81    1.17
  -2   7  10  194.05    4.42
   2  -7 -10  117.91    3.46
  -2  -7  -8    8.00    1.58
   2   6   8  150.84    3.66
  -2   6  10   50.61    2.25
   2  -6 -10   27.07    1.89
  -2  -6  -8   89.81    3.07
   2   5   8    5.72    0.93
  -2   5  10   66.96    2.50
   2  -5 -10   37.38    2.02
  -2  -5  -8    4.73    1.36
   2   4   8    1.55    0.61
  -2   4  10    8.71    1.03
   2  -4 -10    6.89    1.28
  -2  -4  -8    0.97    0.51
  -2  -4  -8    0.13    0.92
   2   3   8    2.69    0.68
  -2   3  10   12.55    1.13
   2  -3 -10    8.87    1.32
  -2  -3  -8    1.64    0.57
  -2  -3  -8    1.44    0.99
   2   2   8  130.46    2.92
  -2   2  10  154.33    3.49
   2  -2 -10  110.17    3.05
  -2  -2  -8   98.97    2.45
  -2  -2  -8   79.87    2.66
   2   1   8   24.45    1.29
  -2   1  10  183.14    3.72
   2  -1 -10  128.97    3.27
  -2  -1  -8   17.81    1.21
  -2  -1  -8   15.17    1.39
   2   0   8  186.14    3.14
  -2   0  10  249.37    4.23
   2   0 -10  197.16    3.99
  -2   0  -8  128.74    2.87
  -2   0  -8  129.71    3.27
   2  -1   8   23.97    1.14
  -2  -1  10  180.16    3.54
   2   1 -10  186.99    2.75
   2   1 -10  151.59    3.52
  -2   1  -8   16.49    1.22
  -2   1  -8   18.76    1.43
   2  -2   8  132.00    2.34
  -2  -2  10  148.31    3.14
   2   2 -10  152.85    2.68
   2   2 -10  129.43    3.28
  -2   2  -8   99.80    2.66
  -2   2  -8  100.17    2.90
  -2  -3  10   12.05    1.00
   2   3 -10   12.93    0.90
   2   3 -10   10.07    1.08
  -2   3  -8    1.49    0.56
  -2   3  -8    1.44    0.73
   2   4 -10    9.46    0.84
   2   4 -10    9.42    1.08
  -2   4  -8    0.89    0.52
  -2   4  -8    0.68    0.66
  -2  -5  10   62.62    1.99
   2   5 -10   64.45    2.10
   2   5 -10   59.85    2.38
  -2   5  -8    4.45    0.84
  -2   5  -8    4.34    1.00
  -2  -6  10   50.99    1.80
   2   6 -10   50.42    1.96
  -2   6  -8  138.29    3.48
  -2   6  -8  128.75    3.44
  -2  -7  10  190.97    3.36
   2   7 -10  189.88    3.92
  -2   7  -8   11.06    1.14
  -2   7  -8   10.17    1.26
   2   8 -10   19.32    1.37
  -2   8  -8   85.61    2.93
   2   9 -10  119.28    3.38
  -2   9  -8    9.25    1.12
   2  10 -10    2.09    0.66
  -2  10  -8   66.94    2.76
   2  11 -10   21.79    1.62
  -2  11  -8    5.95    1.04
   2  12 -10    2.09    0.75
  -2  12  -8   11.97    1.34
   2  13 -10    0.17    0.49
  -2  13  -8    8.61    1.31
   2  14 -10    1.42    0.78
  -2  14  -8   23.27    1.90
   2  15 -10   65.95    3.12
  -2  15  -8    5.36    1.16
   2  16 -10    1.71    0.83
  -2  16  -8   96.74    3.93
   2  17 -10   58.76    3.13
  -2  17  -8    2.37    0.95
   2  18 -10    5.20    1.24
  -2  18  -8   42.22    2.77
   2  19 -10    5.30    1.35
  -2  19  -8    1.67    0.95
   2  20 -10    0.55    0.76
  -2  20  -8    1.28    0.94
   2  21 -10   -0.30    0.69
  -2  21  -8   -0.33    0.64
   2  22 -10    0.31    0.83
  -2  22  -8    2.31    1.17
  -4  20  11   23.03    2.41
   4  19   7   23.72    2.40
  -4  19  11    2.68    1.22
   4  18   7    2.66    1.21
  -4  18  11   11.96    1.93
   4  17   7    5.08    1.37
  -4  17  11    0.84    0.93
   4  16   7    2.22    1.08
  -4  16  11    1.38    0.96
   4  15   7    7.36    1.50
  -4  15  11    8.15    1.54
   4  14   7   13.95    1.70
  -4  14  11   68.18    3.41
   4  13   7   31.80    2.35
  -4  13  11    8.02    1.46
   4  12   7   81.53    3.54
  -4  12  11   83.25    3.59
   4  11   7   10.81    1.56
  -4  11  11    8.90    1.43
   4  10   7   62.41    2.95
  -4  10  11   11.68    1.45
   4   9   7    3.59    0.99
  -4   9  11    5.80    1.18
   4   8   7    0.72    0.66
  -4   8  11    0.85    0.72
   4  -8 -11    0.62    1.02
   4   7   7    0.33    0.58
  -4   7  11    0.69    0.67
   4  -7 -11   -0.13    0.92
   4   6   7   57.63    2.56
  -4   6  11   65.81    2.89
   4  -6 -11   43.37    2.20
  -4  -6  -7   37.84    2.25
   4   5   7   30.33    1.85
  -4   5  11    0.33    0.64
   4  -5 -11   -0.80    0.88
  -4  -5  -7   28.79    1.81
  -4  -5  -7   21.74    1.86
   4   4   7   40.79    2.05
  -4   4  11  108.17    3.55
   4  -4 -11   69.07    2.58
  -4  -4  -7   36.40    2.00
  -4  -4  -7   24.35    1.87
   4   3   7   26.32    1.67
  -4   3  11   45.97    2.33
   4  -3 -11   28.58    1.80
  -4  -3  -7   22.24    1.66
  -4  -3  -7   14.21    1.54
   4   2   7   67.32    2.44
  -4   2  11   85.38    3.09
   4  -2 -11   64.20    2.44
  -4  -2  -7   52.97    2.37
  -4  -2  -7   39.50    2.07
   4   1   7   10.39    1.09
  -4   1  11   12.68    1.29
   4  -1 -11   11.63    1.26
  -4  -1  -7    9.01    1.26
  -4  -1  -7    5.71    1.32
   4   0   7    0.03    0.42
  -4   0  11    0.89    0.64
   4   0 -11   -0.12    0.65
  -4   0  -7    0.12    0.66
  -4   0  -7   -0.81    0.83
   4  -1   7   10.38    1.01
  -4  -1  11   15.45    1.37
   4   1 -11   11.75    1.21
  -4   1  -7    6.62    1.17
  -4   1  -7    5.83    1.27
  -4  -2  11   89.23    3.03
   4   2 -11   77.56    2.62
  -4   2  -7   48.08    2.37
  -4   2  -7   44.63    2.07
  -4  -3  11   45.18    2.20
   4   3 -11   42.05    2.00
  -4   3  -7   18.97    1.65
  -4   3  -7   17.69    1.42
  -4  -4  11  107.79    3.30
   4   4 -11  101.32    3.07
  -4   4  -7   28.35    1.95
  -4   4  -7   32.70    1.81
  -4  -5  11    1.52    0.68
   4   5 -11    1.97    0.80
  -4   5  -7   22.94    1.79
  -4   5  -7   26.22    1.67
  -4  -6  11   63.08    2.54
   4   6 -11   61.07    2.52
  -4   6  -7   44.99    2.42
  -4   6  -7   49.22    2.20
  -4  -7  11   -0.20    0.43
   4   7 -11   -0.07    0.34
  -4   7  -7    0.15    0.72
  -4   7  -7   -0.03    0.62
  -4  -8  11   -0.06    0.50
   4   8 -11    0.22    0.42
  -4   8  -7    0.17    0.67
  -4   8  -7    1.29    0.81
   4   9 -11    0.89    0.64
   4   9 -11    3.86    0.88
   4   9 -11    3.47    0.82
  -4   9  -7    1.36    0.86
  -4   9  -7    2.80    1.03
   4  10 -11   12.02    1.30
   4  10 -11   11.77    1.30
   4  10 -11   13.12    1.31
  -4  10  -7   48.01    2.64
  -4  10  -7   59.15    2.65
   4  11 -11    8.52    1.26
  -4  11  -7    7.79    1.33
   4  12 -11   72.45    3.19
  -4  12  -7   69.63    3.30
   4  13 -11    7.29    1.24
  -4  13  -7   27.92    2.23
   4  14 -11   69.63    3.32
  -4  14  -7   10.70    1.64
   4  15 -11    8.02    1.38
  -4  15  -7    7.27    1.48
   4  16 -11    0.75    0.69
  -4  16  -7    2.03    1.02
   4  17 -11    0.33    0.63
  -4  17  -7    2.36    1.10
   4  18 -11   12.25    1.80
  -4  18  -7    1.44    0.95
   4  19 -11    1.87    0.97
  -4  19  -7   18.25    2.13
   4  20 -11   23.65    2.36
  -4  20  -7    9.16    1.78
   6  15   6   17.47    2.12
  -6  15  12    9.98    1.86
   6  14   6    0.00    0.84
  -6  14  12   13.73    2.04
   6  13   6    0.74    0.96
  -6  13  12    0.50    0.84
   6  12   6   -0.08    0.78
  -6  12  12    3.73    1.24
   6  11   6    3.20    1.20
  -6  11  12    1.55    0.96
   6  10   6    0.55    0.85
  -6  10  12   18.54    1.94
   6   9   6   42.59    2.73
  -6   9  12   30.82    2.41
   6   8   6    0.85    0.87
  -6   8  12   59.61    3.21
   6   7   6   46.05    2.70
  -6   7  12   21.39    1.98
   6   6   6    0.79    0.84
  -6   6  12   14.57    1.67
   6   5   6   16.84    1.67
  -6   5  12    3.32    1.11
  -6  -5  -6   12.37    1.67
   6   4   6    9.34    1.49
  -6   4  12   -0.08    0.62
  -6  -4  -6    8.02    1.42
   6   3   6    7.12    1.33
  -6   3  12    2.01    0.88
  -6  -3  -6    7.38    1.39
   6   2   6    2.99    1.00
  -6   2  12   24.67    2.02
  -6  -2  -6    2.82    1.11
   6   1   6   96.98    3.41
  -6   1  12   35.06    2.36
  -6  -1  -6   67.95    3.21
  -6   0  12  145.96    4.63
  -6   0  -6    9.35    1.57
  -6  -1  12   37.13    2.40
  -6   1  -6   64.06    3.15
  -6  -2  12   24.21    1.94
  -6   2  -6    2.66    1.16
  -6  -3  12    2.00    0.86
  -6   3  -6    4.49    1.28
  -6  -4  12    0.47    0.63
  -6   4  -6    2.44    1.10
  -6  -5  12    5.49    1.20
  -6   5  -6   11.01    1.73
  -6  -6  12   13.50    1.53
  -6   6  -6   -0.58    0.84
  -6  -7  12   17.42    1.73
  -6   7  -6   29.05    2.40
   6   8 -12   55.81    2.94
  -6   8  -6    1.70    1.14
   6   9 -12   30.19    2.22
  -6   9  -6   27.31    2.37
   6  10 -12   18.72    1.87
   6  10 -12   17.04    1.74
  -6  10  -6    1.39    1.16
   6  11 -12    0.44    0.85
   6  11 -12    1.72    0.88
  -6  11  -6    3.48    1.38
   6  12 -12    4.45    1.25
   6  12 -12    2.88    0.99
  -6  12  -6    0.44    0.95
   6  13 -12    0.79    0.72
  -6  13  -6    0.36    0.98
   6  14 -12    9.60    1.60
  -6  14  -6   -0.69    0.82
   6  15 -12    8.38    1.55
  -6  15  -6    9.82    1.85
   6  16 -12   16.90    2.00
  -6  16  -6   -0.88    0.87
   6  17 -12    5.22    1.42
  -6  17  -6   15.86    2.30
   8   9   5    2.56    1.31
   8   8   5   -0.13    1.10
   8   7   5    2.35    1.20
   8   6   5    8.49    1.69
  -8   6  13    1.12    0.99
   8   5   5   10.55    1.90
  -8   5  13   33.04    2.72
  -8   4  13    4.96    1.38
  -8   3  13   45.76    3.12
  -8  -3  -5    6.27    1.49
  -8   2  13    0.08    0.78
  -8  -2  -5    2.94    1.17
  -8   1  13    6.88    1.55
  -8  -1  -5    4.07    1.33
  -8   0  13    0.20    0.79
  -8   0  -5    0.70    0.88
  -8  -1  13    5.10    1.37
  -8   1  -5    2.94    1.25
  -8  -2  13   -0.13    0.76
  -8   2  -5    4.37    1.36
  -8  -3  13   46.05    3.11
  -8   3  -5    5.21    1.48
  -8  -4  13    3.81    1.26
  -8   4  -5    5.99    1.56
  -8  -5  13   30.75    2.60
  -8   5  -5    8.15    1.74
   8   6 -13    0.95    0.97
  -8   6  -5    7.08    1.66
   8   7 -13    3.47    1.34
   8   7 -13    8.34    1.68
  -8   7  -5    2.86    1.31
   8   8 -13    1.05    1.06
   8   8 -13    1.46    1.07
  -8   8  -5    1.34    1.16
   8   9 -13    1.30    1.01
  -8   9  -5    0.64    1.12
  -8  10  -5    0.05    1.12
  -1  22  10   20.70    2.30
   1  21   9    0.35    0.91
  -1  21  10   26.61    2.49
   1  20   9    1.19    0.97
  -1  20  10   28.05    2.46
   1  19   9    0.64    0.89
  -1  19  10   21.15    2.15
   1  18   9   23.55    2.16
  -1  18  10    9.51    1.69
   1  17   9    6.41    1.40
  -1  17  10    4.22    1.23
   1  16   9   36.74    2.52
  -1  16  10    0.79    0.80
   1  15   9   -0.08    0.60
  -1  15  10   15.26    1.70
   1  14   9   22.63    1.91
  -1  14  10   84.79    3.52
   1  13   9   -0.04    0.60
  -1  13  10   45.07    2.54
   1  12   9    1.91    0.80
  -1  12  10   39.96    2.32
   1  11   9    4.08    0.96
  -1  11  10   20.30    1.68
   1  10   9  148.08    4.10
  -1  10  10   45.53    2.35
   1 -10 -10   29.87    2.19
   1   9   9    5.98    1.06
  -1   9  10   12.90    1.32
   1  -9 -10   10.47    1.76
  -1  -9  -9    5.59    1.51
   1   8   9  191.55    4.38
  -1   8  10    0.39    0.51
   1  -8 -10    1.03    1.16
  -1  -8  -9  117.56    3.68
   1   7   9    5.93    0.98
  -1   7  10   14.87    1.31
   1  -7 -10   11.89    1.73
  -1  -7  -9    3.19    1.23
   1   6   9  197.19    4.16
  -1   6  10  103.93    3.10
   1  -6 -10   59.86    2.57
  -1  -6  -9  108.66    3.37
   1   5   9    1.11    0.59
  -1   5  10  173.04    3.87
   1  -5 -10  107.13    3.25
  -1  -5  -9    2.02    1.10
   1   4   9    1.15    0.56
  -1   4  10   84.30    2.65
   1  -4 -10   53.92    2.35
  -1  -4  -9    2.17    1.04
   1   3   9    9.07    0.95
  -1   3  10   41.60    1.83
   1  -3 -10   28.79    1.77
  -1  -3  -9    7.07    0.71
  -1  -3  -9    6.40    1.29
   1   2   9  134.45    2.94
  -1   2  10   25.47    1.43
   1  -2 -10   17.98    1.43
  -1  -2  -9  100.92    2.08
  -1  -2  -9   85.04    2.81
   1   1   9   16.95    1.11
  -1   1  10   12.07    1.00
   1  -1 -10    8.56    1.23
  -1  -1  -9   11.12    0.89
  -1  -1  -9    9.98    1.20
   1   0   9  386.87    4.51
  -1   0  10   -0.11    0.32
   1   0 -10   -0.05    0.51
  -1   0  -9  282.94    3.72
  -1   0  -9  284.79    4.90
   1  -1   9   15.35    0.97
  -1  -1  10    9.37    0.90
   1   1 -10   10.02    0.69
   1   1 -10    8.26    1.02
  -1   1  -9   13.60    0.99
  -1   1  -9    9.68    1.13
  -1  -2  10   24.31    1.25
   1   2 -10   25.98    1.13
   1   2 -10   19.57    1.40
  -1   2  -9  118.27    2.63
  -1   2  -9  102.40    3.00
  -1  -3  10   40.84    1.51
   1   3 -10   44.59    1.54
   1   3 -10   32.64    1.77
  -1   3  -9    7.92    0.88
  -1   3  -9    6.58    1.12
  -1  -4  10   83.29    2.03
   1   4 -10   87.86    2.27
   1   4 -10   72.63    2.61
  -1   4  -9    1.97    0.55
  -1   4  -9    1.59    0.72
  -1  -5  10  170.28    2.80
   1   5 -10  180.14    3.43
   1   5 -10  150.18    3.76
  -1   5  -9    1.46    0.55
  -1   5  -9    1.29    0.77
   1   6 -10  104.03    2.76
   1   6 -10   85.05    2.92
  -1   6  -9  198.57    3.97
  -1   6  -9  164.07    3.97
   1   7 -10   15.21    1.19
  -1   7  -9    5.32    0.86
  -1   7  -9    4.18    1.05
   1   8 -10   -0.03    0.32
  -1   8  -9  189.05    4.16
   1   9 -10   13.13    1.22
  -1   9  -9    5.77    0.95
   1  10 -10   46.21    2.21
  -1  10  -9  142.86    3.89
   1  11 -10   20.56    1.58
  -1  11  -9    4.37    0.94
   1  12 -10   39.34    2.21
  -1  12  -9    2.13    0.76
   1  13 -10   46.14    2.47
  -1  13  -9   -0.16    0.45
   1  14 -10   80.78    3.33
  -1  14  -9   21.67    1.81
   1  15 -10   18.70    1.77
  -1  15  -9   -0.42    0.44
   1  16 -10    0.10    0.64
  -1  16  -9   31.31    2.26
   1  17 -10    2.95    1.03
  -1  17  -9    7.45    1.36
   1  18 -10   11.89    1.71
  -1  18  -9   19.77    1.96
   1  19 -10   19.61    2.02
  -1  19  -9    0.08    0.67
   1  20 -10   25.69    2.35
  -1  20  -9    1.09    0.89
   1  21 -10   26.22    2.43
  -1  21  -9    0.30    0.83
   1  22 -10   20.62    2.25
  -1  22  -9    6.74    1.56
   1  23 -10    4.40    1.49
  -1  23  -9    2.54    1.23
   3  20   8    9.26    1.86
  -3  20  11    0.46    0.90
   3  19   8   10.43    1.83
  -3  19  11   13.92    2.03
   3  18   8    2.50    1.15
  -3  18  11    0.53    0.84
   3  17   8    1.66    1.04
  -3  17  11   36.67    2.65
   3  16   8    0.65    0.82
  -3  16  11    9.22    1.59
   3  15   8    2.45    1.02
  -3  15  11   42.87    2.72
   3  14   8    2.00    0.95
  -3  14  11    0.92    0.79
   3  13   8   54.36    2.90
  -3  13  11   11.29    1.64
   3  12   8   30.52    2.18
  -3  12  11    8.35    1.34
   3  11   8   54.22    2.76
  -3  11  11    2.76    0.91
   3  10   8    1.08    0.73
  -3  10  11    2.35    0.87
   3   9   8    2.52    0.88
  -3   9  11  135.61    4.14
   3  -9 -11  101.07    3.44
   3   8   8    1.38    0.70
  -3   8  11    0.66    0.65
   3  -8 -11   -0.38    1.02
  -3  -8  -8    0.90    1.25
   3   7   8   11.78    1.28
  -3   7  11  195.77    4.75
   3  -7 -11  128.75    3.67
  -3  -7  -8    8.91    1.78
   3   6   8   55.85    2.41
  -3   6  11    8.63    1.24
   3  -6 -11    6.53    1.42
  -3  -6  -8   35.51    2.20
   3   5   8  210.40    4.42
  -3   5  11    0.45    0.58
   3  -5 -11   -0.49    0.87
  -3  -5  -8  180.12    3.76
  -3  -5  -8  121.76    3.60
   3   4   8   46.50    2.08
  -3   4  11    1.06    0.66
   3  -4 -11    1.82    0.99
  -3  -4  -8   37.83    1.84
  -3  -4  -8   27.12    1.94
   3   3   8  118.59    3.12
  -3   3  11   65.75    2.61
   3  -3 -11   44.18    2.15
  -3  -3  -8   93.41    2.75
  -3  -3  -8   69.63    2.69
   3   2   8   16.89    1.24
  -3   2  11    8.86    1.15
   3  -2 -11    6.52    1.25
  -3  -2  -8   14.16    1.27
  -3  -2  -8   11.78    1.40
   3   1   8    3.23    0.67
  -3   1  11  238.86    4.70
   3  -1 -11  175.31    3.91
  -3  -1  -8    2.69    0.83
  -3  -1  -8    3.52    1.08
   3   0   8    0.11    0.40
  -3   0  11   91.37    2.90
   3   0 -11   70.09    2.54
  -3   0  -8   -0.02    0.57
  -3   0  -8    0.10    0.79
   3  -1   8    2.92    0.61
  -3  -1  11  238.93    4.57
   3   1 -11  197.90    4.17
  -3   1  -8    1.88    0.79
  -3   1  -8    2.48    0.97
  -3  -2  11    7.51    1.04
   3   2 -11    6.09    1.10
  -3   2  -8   11.77    1.29
  -3   2  -8   11.67    1.28
  -3  -3  11   60.52    2.31
   3   3 -11   64.42    2.05
   3   3 -11   55.96    2.31
  -3   3  -8   82.59    2.81
  -3   3  -8   89.94    2.89
  -3  -4  11    1.87    0.65
   3   4 -11    1.35    0.47
   3   4 -11    1.51    0.71
  -3   4  -8   35.44    1.97
  -3   4  -8   38.51    2.00
  -3  -5  11    0.91    0.54
   3   5 -11    1.02    0.47
   3   5 -11    1.49    0.73
  -3   5  -8  164.55    4.04
  -3   5  -8  174.60    4.02
  -3  -6  11    9.14    1.12
   3   6 -11    9.28    0.98
   3   6 -11    8.89    1.32
  -3   6  -8   45.68    2.27
  -3   6  -8   46.87    2.22
  -3  -7  11  200.25    4.02
   3   7 -11  194.09    4.19
  -3   7  -8   10.73    1.27
  -3   7  -8   10.91    1.48
  -3  -8  11    0.62    0.58
   3   8 -11    0.54    0.46
  -3   8  -8    1.28    0.70
  -3   8  -8    0.95    0.82
   3   9 -11  132.79    3.75
  -3   9  -8    2.06    0.81
  -3   9  -8    3.04    1.04
   3  10 -11    3.05    0.80
  -3  10  -8    1.15    0.71
   3  11 -11    0.83    0.59
  -3  11  -8   47.51    2.58
   3  12 -11   10.35    1.28
  -3  12  -8   30.63    2.13
   3  13 -11    8.50    1.29
  -3  13  -8   54.17    2.86
   3  14 -11    0.03    0.52
  -3  14  -8    1.88    0.91
   3  15 -11   40.95    2.58
  -3  15  -8    0.90    0.76
   3  16 -11    9.47    1.50
  -3  16  -8   -0.14    0.62
   3  17 -11   35.28    2.54
  -3  17  -8    1.69    0.96
   3  18 -11   -0.16    0.62
  -3  18  -8    3.78    1.27
   3  19 -11    8.67    1.55
  -3  19  -8    7.53    1.57
   3  20 -11   -0.01    0.70
  -3  20  -8    8.67    1.73
   3  21 -11    0.66    0.89
  -3  21  -8   10.79    1.94
   5  17   7   16.16    2.26
  -5  17  12   -0.47    0.86
   5  16   7    0.35    0.92
  -5  16  12    1.42    1.13
   5  15   7   21.05    2.20
  -5  15  12    0.47    0.89
   5  14   7    1.14    1.01
  -5  14  12   12.94    1.91
   5  13   7    3.77    1.25
  -5  13  12   23.83    2.21
   5  12   7    0.83    0.78
  -5  12  12   17.13    1.90
   5  11   7    9.17    1.57
  -5  11  12   26.48    2.21
   5  10   7    6.67    1.37
  -5  10  12   13.17    1.79
   5   9   7   56.54    2.94
  -5   9  12    3.58    1.11
   5   8   7    1.46    0.91
  -5   8  12    2.64    0.99
   5   7   7   65.61    3.02
  -5   7  12   57.29    2.97
   5   6   7    8.92    1.38
  -5   6  12  127.21    4.30
   5   5   7    8.65    1.33
  -5   5  12   44.42    2.56
  -5  -5  -7    9.02    1.36
   5   4   7    4.73    1.08
  -5   4  12   43.88    2.51
  -5  -4  -7    3.91    1.04
   5   3   7    1.62    0.81
  -5   3  12   12.27    1.42
  -5  -3  -7    2.16    0.92
   5   2   7   11.20    1.29
  -5   2  12   47.35    2.56
  -5  -2  -7    7.65    1.32
   5   1   7  134.30    3.65
  -5   1  12    3.13    0.94
  -5  -1  -7  100.90    3.56
  -5   0  12    0.06    0.52
  -5   0  -7    7.81    1.37
  -5  -1  12    2.77    0.88
  -5   1  -7   93.64    3.48
  -5  -2  12   48.61    2.51
  -5   2  -7    6.21    1.31
  -5  -3  12   12.91    1.39
  -5   3  -7    0.33    0.85
  -5  -4  12   43.82    2.37
  -5   4  -7    2.52    1.06
  -5  -5  12   45.83    2.43
  -5   5  -7    5.46    1.28
  -5  -6  12  120.30    3.87
  -5   6  -7    5.88    1.35
  -5  -7  12   54.99    2.68
  -5   7  -7   44.10    2.68
  -5  -8  12    1.78    0.86
  -5   8  -7    1.55    1.03
   5   9 -12    1.22    0.75
   5   9 -12    3.60    0.91
   5   9 -12    2.87    0.90
  -5   9  -7   40.16    2.63
   5  10 -12    5.98    1.18
   5  10 -12   10.40    1.41
   5  10 -12    8.31    1.25
  -5  10  -7    5.02    1.29
   5  11 -12   26.79    2.06
  -5  11  -7    7.65    1.50
   5  12 -12   15.31    1.65
  -5  12  -7    1.13    0.96
   5  13 -12   21.77    1.98
  -5  13  -7    4.89    1.36
   5  14 -12   10.82    1.62
  -5  14  -7    0.03    0.84
   5  15 -12    0.88    0.79
  -5  15  -7   11.92    1.92
   5  16 -12    1.07    0.79
   5  17 -12   -0.20    0.61
  -5  17  -7   12.43    1.98
   5  18 -12    4.21    1.30
  -5  18  -7    3.24    1.41
   7  12   6   21.29    2.30
   7  11   6    0.37    0.98
  -7  11  13    0.28    0.85
   7  10   6    6.12    1.50
  -7  10  13   18.98    2.13
   7   9   6    0.19    0.94
  -7   9  13    1.11    1.01
   7   8   6    1.82    1.09
  -7   8  13   26.93    2.41
   7   7   6   -0.10    0.80
  -7   7  13    4.23    1.29
   7   6   6   18.87    1.97
  -7   6  13   19.73    2.05
   7   5   6   11.31    1.77
  -7   5  13    0.20    0.63
   7   4   6   50.64    2.88
  -7   4  13    0.99    0.86
  -7  -4  -6   32.69    2.50
  -7   3  13   -0.36    0.68
  -7  -3  -6    0.71    0.94
  -7   2  13   31.12    2.45
  -7  -2  -6   11.02    1.76
  -7   1  13    8.88    1.57
  -7  -1  -6    4.20    1.26
  -7   0  13   73.84    3.63
  -7   0  -6    0.20    0.84
  -7  -1  13    7.63    1.49
  -7   1  -6    3.32    1.22
  -7  -2  13   29.78    2.35
  -7   2  -6   11.43    1.82
  -7  -3  13    0.27    0.72
  -7   3  -6    1.04    1.01
  -7  -4  13    0.94    0.81
  -7   4  -6   30.20    2.49
  -7  -5  13    0.23    0.72
  -7   5  -6    7.08    1.58
  -7  -6  13   17.62    1.89
  -7   6  -6   11.81    1.86
  -7  -7  13    4.67    1.30
  -7   7  -6   -0.17    0.85
   7   8 -13   33.95    2.55
  -7   8  -6    0.56    1.06
   7   9 -13    1.31    0.92
   7   9 -13    1.32    0.96
  -7   9  -6    0.95    1.13
   7  10 -13   23.27    2.26
   7  10 -13   22.63    2.15
  -7  10  -6    4.94    1.57
   7  11 -13   -0.33    0.81
   7  11 -13    0.19    0.70
  -7  11  -6    0.95    1.20
  -7  12  -6   14.29    2.25
   7  13 -13    1.32    0.89
  -7  13  -6    2.42    1.37
   0  21  10    0.51    0.93
   0  20  10    1.32    1.09
   0  19  10    5.69    1.43
   0  18  10   22.20    2.13
   0  17  10   22.37    2.08
   0  16  10   54.17    3.03
   0  15  10   49.71    2.83
   0  14  10   17.16    1.71
   0  13  10    6.21    1.23
   0  12  10    0.91    0.70
   0  11  10    0.82    0.66
   0  10  10   67.08    2.83
   0 -10 -10   46.57    2.61
   0   9  10    1.03    0.62
   0  -9 -10    1.62    1.20
   0   8  10  126.88    3.64
   0  -8 -10   78.59    3.11
   0   7  10   76.72    2.77
   0  -7 -10   44.71    2.40
   0   6  10   64.50    2.49
   0  -6 -10   37.28    2.18
   0   5  10    9.07    1.06
   0  -5 -10    6.03    1.33
   0   4  10   22.92    1.48
   0  -4 -10   15.71    1.51
   0   3  10   13.52    1.15
   0  -3 -10    6.85    1.31
   0   2  10   93.40    2.55
   0  -2 -10   62.92    2.49
   0   1  10   72.92    2.18
   0  -1 -10   50.20    2.23
   0   0  10  476.12    5.22
   0   0 -10  420.95    4.01
   0   0 -10  337.83    5.47
   0  -1  10   70.18    1.95
   0   1 -10   72.22    1.82
   0   1 -10   57.22    2.35
   0  -2  10   91.89    2.10
   0   2 -10   94.81    2.19
   0   2 -10   75.28    2.66
   0  -3  10   12.45    0.87
   0   3 -10   11.93    0.91
   0   3 -10    8.88    1.09
   0   4 -10   23.54    1.27
   0   4 -10   18.56    1.48
   0   5 -10    8.60    0.88
   0   5 -10    8.10    1.26
   0   6 -10   64.99    2.25
   0   6 -10   55.47    2.44
   0   7 -10   72.87    2.48
   0   8 -10  128.84    3.41
   0   9 -10    0.38    0.47
   0  10 -10   67.91    2.70
   0  11 -10    1.92    0.72
   0  12 -10   -0.26    0.39
   0  13 -10    5.58    1.09
   0  14 -10   15.70    1.60
   0  15 -10   53.25    2.84
   0  16 -10   54.88    2.96
   0  17 -10   24.28    2.12
   0  18 -10   17.96    1.89
   0  19 -10    5.16    1.33
   0  20 -10    0.76    0.84
   0  21 -10    1.17    0.91
   0  22 -10   11.22    1.91
  -2  21  11    3.04    1.33
   2  20   9    9.65    1.80
  -2  20  11   20.43    2.22
   2  19   9   34.76    2.71
  -2  19  11    1.64    1.07
   2  18   9   -0.76    0.65
  -2  18  11    9.14    1.65
   2  17   9   -0.07    0.76
  -2  17  11    3.82    1.18
   2  16   9    2.00    0.98
  -2  16  11    6.81    1.41
   2  15   9   18.50    1.86
  -2  15  11   12.53    1.74
   2  14   9    5.25    1.24
  -2  14  11  134.44    4.54
   2  13   9   47.06    2.67
  -2  13  11   26.37    2.07
   2  12   9   17.18    1.67
  -2  12  11   75.01    3.26
   2  11   9   61.80    2.86
  -2  11  11   54.32    2.74
   2  10   9    8.20    1.27
  -2  10  11  107.86    3.69
   2 -10 -11   75.13    3.18
   2   9   9    5.59    1.06
  -2   9  11   45.58    2.39
   2  -9 -11   33.79    2.26
  -2  -9  -9    2.17    1.44
   2   8   9   18.76    1.54
  -2   8  11    3.04    0.86
   2  -8 -11    2.23    1.28
  -2  -8  -9   17.23    1.86
   2   7   9   85.94    2.98
  -2   7  11   14.79    1.40
   2  -7 -11   10.83    1.73
  -2  -7  -9   54.49    2.69
   2   6   9   15.96    1.36
  -2   6  11   92.26    3.11
   2  -6 -11   55.91    2.58
  -2  -6  -9    9.27    1.73
   2   5   9  117.06    3.24
  -2   5  11   38.49    2.00
   2  -5 -11   24.48    1.84
  -2  -5  -9   64.93    2.76
   2   4   9   13.97    1.21
  -2   4  11   71.08    2.61
   2  -4 -11   49.23    2.32
  -2  -4  -9    9.72    0.98
  -2  -4  -9    6.77    1.39
   2   3   9  265.23    4.47
  -2   3  11    7.77    1.06
   2  -3 -11    3.88    1.16
  -2  -3  -9  221.94    3.66
  -2  -3  -9  153.80    3.90
   2   2   9   25.41    1.42
  -2   2  11  127.11    3.30
   2  -2 -11   85.94    2.88
  -2  -2  -9   17.17    1.20
  -2  -2  -9   15.93    1.51
   2   1   9   32.03    1.51
  -2   1  11    0.08    0.46
   2  -1 -11    0.47    0.74
  -2  -1  -9   23.79    1.40
  -2  -1  -9   18.58    1.53
   2   0   9   -0.04    0.35
  -2   0  11    0.16    0.41
   2   0 -11   -0.19    0.59
  -2   0  -9   -0.08    0.53
  -2   0  -9   -0.19    0.75
   2  -1   9   30.90    1.34
  -2  -1  11    0.38    0.47
   2   1 -11    0.95    0.72
  -2   1  -9   24.49    1.46
  -2   1  -9   21.01    1.58
  -2  -2  11  119.65    2.95
   2   2 -11  103.95    3.12
  -2   2  -9   17.15    1.31
  -2   2  -9   17.17    1.47
  -2  -3  11    6.36    0.89
   2   3 -11    5.35    0.66
   2   3 -11    5.10    1.03
  -2   3  -9  216.46    4.09
  -2   3  -9  210.82    4.42
  -2  -4  11   72.60    2.23
   2   4 -11   78.04    2.24
   2   4 -11   66.23    2.58
  -2   4  -9   12.08    1.17
  -2   4  -9   11.48    1.28
  -2  -5  11   34.85    1.58
   2   5 -11   38.67    1.68
   2   5 -11   32.97    1.91
  -2   5  -9  101.88    3.01
  -2   5  -9   98.65    3.13
  -2  -6  11   90.92    2.42
   2   6 -11   96.28    2.75
   2   6 -11   83.89    2.98
  -2   6  -9   13.01    1.23
  -2   6  -9   13.73    1.38
   2   7 -11   15.25    1.22
  -2   7  -9   78.07    2.80
  -2   7  -9   76.78    2.89
   2   8 -11    3.14    0.73
  -2   8  -9   18.71    1.51
  -2   8  -9   17.87    1.64
   2   9 -11   47.24    2.22
  -2   9  -9    5.42    1.02
   2  10 -11  104.02    3.36
  -2  10  -9    7.89    1.18
   2  11 -11   58.44    2.63
  -2  11  -9   54.09    2.63
   2  12 -11   74.81    3.06
  -2  12  -9   15.61    1.53
   2  13 -11   27.77    1.98
  -2  13  -9   45.07    2.55
   2  14 -11  130.71    4.29
  -2  14  -9    2.42    0.90
   2  15 -11   11.74    1.47
  -2  15  -9   18.85    1.81
   2  16 -11    5.25    1.18
  -2  16  -9    0.42    0.70
   2  17 -11    2.48    1.02
  -2  17  -9    0.60    0.74
   2  18 -11    6.59    1.43
  -2  18  -9    0.05    0.67
   2  19 -11    3.16    1.18
  -2  19  -9   32.35    2.60
   2  20 -11   16.14    1.95
  -2  20  -9    7.17    1.61
   2  21 -11    2.49    1.15
  -2  21  -9   23.32    2.37
   2  22 -11    7.57    1.70
  -2  22  -9    2.23    1.27
  -4  19  12    5.81    1.54
   4  18   8   14.99    2.15
  -4  18  12    4.97    1.42
   4  17   8   25.33    2.40
  -4  17  12   36.23    2.76
   4  16   8    9.72    1.75
  -4  16  12    1.00    0.86
   4  15   8   34.57    2.60
  -4  15  12   40.59    2.79
   4  14   8   27.93    2.33
  -4  14  12    2.40    1.03
   4  13   8   10.29    1.65
  -4  13  12    2.39    1.03
   4  12   8    1.63    0.94
  -4  12  12    3.75    1.09
   4  11   8   44.63    2.65
  -4  11  12   18.75    1.83
   4  10   8   10.28    1.52
  -4  10  12    5.74    1.26
   4   9   8   76.28    3.24
  -4   9  12   58.62    2.97
   4   8   8   37.17    2.24
  -4   8  12    1.14    0.80
   4  -8 -12    0.45    1.03
   4   7   8   49.65    2.51
  -4   7  12   95.19    3.61
   4  -7 -12   65.09    2.77
  -4  -7  -8   35.07    2.30
   4   6   8   10.31    1.28
  -4   6  12   -0.59    0.46
   4  -6 -12   -0.73    0.89
  -4  -6  -8    7.97    1.69
   4   5   8   12.71    1.31
  -4   5  12    4.47    1.08
   4  -5 -12    2.52    1.19
  -4  -5  -8   10.52    1.22
  -4  -5  -8    7.51    1.68
   4   4   8   11.34    1.22
  -4   4  12    3.17    0.92
   4  -4 -12    3.15    1.21
  -4  -4  -8    5.24    1.05
  -4  -4  -8    7.12    1.61
   4   3   8    1.08    0.63
  -4   3  12    7.63    1.22
   4  -3 -12    8.78    1.48
  -4  -3  -8    1.24    0.78
  -4  -3  -8    0.10    1.11
   4   2   8   69.52    2.54
  -4   2  12   66.02    2.81
   4  -2 -12   48.40    2.30
  -4  -2  -8   50.29    2.36
  -4  -2  -8   42.73    2.27
   4   1   8   12.37    1.19
  -4   1  12  230.83    5.09
   4  -1 -12  179.76    4.11
  -4  -1  -8    9.13    1.32
  -4  -1  -8    8.17    1.59
  -4   0  12   22.88    1.71
   4   0 -12   19.46    1.60
  -4   0  -8   15.49    1.49
  -4   0  -8   13.86    1.48
  -4  -1  12  234.57    5.04
   4   1 -12  190.97    4.24
  -4   1  -8    9.17    1.32
  -4   1  -8    7.40    1.45
  -4  -2  12   64.71    2.68
   4   2 -12   63.96    2.56
  -4   2  -8   46.82    2.40
  -4   2  -8   48.51    2.28
  -4  -3  12    9.75    1.29
   4   3 -12    7.83    1.27
  -4   3  -8    1.04    0.84
  -4   3  -8    0.62    0.85
  -4  -4  12    3.02    0.83
   4   4 -12    3.65    0.99
  -4   4  -8    6.56    1.24
  -4   4  -8    7.84    1.32
  -4  -5  12    5.91    1.05
   4   5 -12    3.23    0.72
   4   5 -12    5.87    1.17
  -4   5  -8    6.77    1.25
  -4   5  -8    7.92    1.34
  -4  -6  12    0.54    0.57
   4   6 -12    0.15    0.41
   4   6 -12    0.71    0.72
  -4   6  -8    8.87    1.40
  -4   6  -8   10.43    1.49
  -4  -7  12   95.37    3.16
   4   7 -12   96.05    3.17
   4   7 -12   86.27    3.18
  -4   7  -8   38.84    2.35
  -4   7  -8   41.82    2.22
  -4  -8  12    0.08    0.55
   4   8 -12    1.73    0.69
  -4   8  -8   28.95    2.12
  -4   8  -8   30.47    2.01
   4   9 -12   58.45    2.66
  -4   9  -8   64.38    3.04
  -4   9  -8   71.63    2.92
   4  10 -12    5.70    1.07
  -4  10  -8   10.23    1.62
   4  11 -12   16.53    1.59
  -4  11  -8   34.95    2.42
  -4  11  -8   43.48    2.43
   4  12 -12    6.51    1.17
  -4  12  -8    1.70    0.86
   4  13 -12    4.12    1.07
  -4  13  -8    8.94    1.51
   4  14 -12    3.29    1.02
  -4  14  -8   18.71    1.93
   4  15 -12   40.60    2.68
  -4  15  -8   28.24    2.37
   4  16 -12    0.48    0.72
  -4  16  -8    7.73    1.58
   4  17 -12   34.70    2.63
  -4  17  -8   19.25    2.12
   4  18 -12    6.58    1.46
  -4  18  -8   10.95    1.88
   4  19 -12    6.38    1.51
  -4  19  -8    6.91    1.66
   4  20 -12    0.01    0.76
  -4  20  -8   -0.17    0.90
   6  14   7   14.59    2.13
  -6  14  13   18.66    2.40
   6  13   7   -0.12    0.91
  -6  13  13   42.56    3.04
   6  12   7   29.94    2.52
  -6  12  13    8.14    1.68
   6  11   7    0.49    0.85
  -6  11  13   25.70    2.34
   6  10   7   10.30    1.75
  -6  10  13    6.88    1.50
   6   9   7    0.06    0.80
  -6   9  13    2.76    1.06
   6   8   7    3.29    1.12
  -6   8  13    0.08    0.68
   6   7   7    0.85    0.87
  -6   7  13   10.42    1.67
   6   6   7   21.47    1.95
  -6   6  13   15.13    1.73
   6   5   7    7.94    1.44
  -6   5  13   33.15    2.42
  -6  -5  -7    6.46    1.33
   6   4   7   53.27    2.76
  -6   4  13   15.98    1.76
  -6  -4  -7   39.59    2.53
   6   3   7    0.65    0.78
  -6   3  13   56.12    3.04
  -6  -3  -7    0.52    0.83
  -6   2  13    7.83    1.39
  -6  -2  -7   40.28    2.55
  -6   1  13    8.95    1.48
  -6  -1  -7    3.57    1.19
  -6   0  13   -0.17    0.61
  -6   0  -7    0.42    0.88
  -6  -1  13   10.10    1.52
  -6   1  -7    5.65    1.34
  -6  -2  13    6.79    1.29
  -6   2  -7   42.75    2.76
  -6  -3  13   52.35    2.85
  -6   3  -7   -0.03    0.89
  -6  -4  13   17.11    1.71
  -6   4  -7   33.97    2.49
  -6  -5  13   35.74    2.37
  -6   5  -7    4.93    1.42
  -6  -6  13   15.33    1.64
  -6   6  -7   12.09    1.85
  -6  -7  13   12.73    1.54
  -6   7  -7    0.52    0.95
  -6  -8  13    0.22    0.68
   6   8 -13    0.06    0.64
  -6   8  -7    1.69    1.18
   6   9 -13    1.37    0.87
   6   9 -13    1.63    0.82
  -6   9  -7   -0.34    0.90
   6  10 -13    5.09    1.28
   6  10 -13    4.02    1.05
   6  10 -13    4.84    1.17
  -6  10  -7    6.43    1.61
   6  11 -13   24.66    2.12
  -6  11  -7   -0.19    0.94
   6  12 -13    7.10    1.40
  -6  12  -7   16.58    2.27
   6  13 -13   35.35    2.63
  -6  13  -7   -0.97    0.93
   6  14 -13   19.44    2.08
  -6  14  -7    7.36    1.69
   6  15 -13    3.72    1.23
  -6  15  -7   -0.33    0.96
   6  16 -13    0.26    0.78
  -6  16  -7    0.42    1.06
   8   8   6    8.36    1.78
   8   7   6    8.49    1.76
   8   6   6   10.48    1.87
  -8  -3  -6    3.26    1.24
  -8   2  14   18.35    2.09
  -8  -2  -6    0.89    0.94
  -8   1  14   -0.55    0.76
  -8  -1  -6    8.34    1.69
  -8   0  14   50.03    3.29
  -8   0  -6    6.33    1.54
  -8  -1  14    0.38    0.85
  -8   1  -6    8.76    1.74
  -8  -2  14   20.16    2.18
  -8   2  -6    1.45    1.10
  -8  -3  14    0.05    0.82
  -8   3  -6    3.02    1.32
  -8  -4  14    1.03    0.95
  -8   4  -6    0.60    1.04
  -8  -5  14    1.77    1.09
  -8   5  -6    2.43    1.26
  -8  -6  14   17.65    2.09
  -8   6  -6    4.62    1.49
   8   7 -14    0.49    0.94
  -8   7  -6    6.63    1.70
  -8   8  -6    6.94    1.74
   1  21  10   25.04    2.48
  -1  21  11    0.71    1.00
   1  20  10   -0.01    0.92
  -1  20  11    1.70    1.09
   1  19  10   17.04    2.01
  -1  19  11    6.83    1.56
   1  18  10    3.71    1.23
  -1  18  11    4.90    1.36
   1  17  10    0.47    0.78
  -1  17  11   14.93    1.79
   1  16  10    2.13    0.95
  -1  16  11   37.00    2.60
   1  15  10   36.64    2.49
  -1  15  11   86.68    3.77
   1  14  10    9.54    1.52
  -1  14  11   18.50    1.83
   1  13  10  116.55    4.08
  -1  13  11    8.59    1.41
   1  12  10    0.29    0.63
  -1  12  11    1.46    0.81
   1  11  10   53.70    2.68
  -1  11  11    5.99    1.14
   1  10  10    3.75    0.98
  -1  10  11    4.02    0.96
   1 -10 -11    5.79    1.59
  -1 -10 -10    3.04    1.44
   1   9  10   73.07    2.93
  -1   9  11   84.76    3.17
   1  -9 -11   53.59    2.77
  -1  -9 -10   46.80    2.65
   1   8  10   12.40    1.34
  -1   8  11   61.28    2.65
   1  -8 -11   35.85    2.32
  -1  -8 -10   11.15    1.89
   1   7  10   94.43    3.12
  -1   7  11  216.13    4.74
   1  -7 -11  126.13    3.81
  -1  -7 -10   54.56    2.70
   1   6  10    4.26    0.88
  -1   6  11   66.75    2.61
   1  -6 -11   39.39    2.29
  -1  -6 -10    3.49    1.32
   1   5  10   82.65    2.74
  -1   5  11    6.07    1.01
   1  -5 -11    3.65    1.26
  -1  -5 -10   47.07    2.40
   1   4  10   28.14    1.63
  -1   4  11   27.79    1.66
   1  -4 -11   15.69    1.56
  -1  -4 -10   14.46    1.57
   1   3  10  192.20    3.83
  -1   3  11    9.97    1.07
   1  -3 -11    7.38    1.37
  -1  -3 -10  114.37    3.45
   1   2  10    7.28    0.90
  -1   2  11   71.80    2.39
   1  -2 -11   48.90    2.31
  -1  -2 -10    5.03    1.28
   1   1  10   37.59    1.63
  -1   1  11   66.96    2.24
   1  -1 -11   50.53    2.30
  -1  -1 -10   26.12    1.28
  -1  -1 -10   23.30    1.72
   1   0  10   -0.29    0.35
  -1   0  11  107.45    2.73
   1   0 -11   80.97    2.83
  -1   0 -10    0.02    0.42
  -1   0 -10   -0.12    0.68
   1  -1  10   38.56    1.49
  -1  -1  11   68.74    2.15
   1   1 -11   52.03    2.30
  -1   1 -10   29.22    1.39
  -1   1 -10   22.81    1.64
  -1  -2  11   68.62    2.09
   1   2 -11   56.89    2.40
  -1   2 -10    5.50    0.79
  -1   2 -10    3.61    1.03
  -1  -3  11    9.44    0.89
   1   3 -11   12.09    0.90
   1   3 -11   10.48    1.17
  -1   3 -10  171.47    3.41
  -1   3 -10  146.13    3.79
  -1  -4  11   27.58    1.29
   1   4 -11   27.68    1.36
   1   4 -11   22.64    1.61
  -1   4 -10   26.01    1.45
  -1   4 -10   23.02    1.64
   1   5 -11    6.42    0.82
   1   5 -11    3.94    0.99
  -1   5 -10   85.40    2.61
  -1   5 -10   72.36    2.76
   1   6 -11   66.61    2.29
   1   6 -11   59.44    2.57
  -1   6 -10    3.68    0.78
  -1   6 -10    3.21    0.98
   1   7 -11  227.99    4.36
   1   7 -11  199.17    4.70
  -1   7 -10   90.92    2.89
  -1   7 -10   81.29    3.02
   1   8 -11   64.06    2.46
  -1   8 -10   12.50    1.23
  -1   8 -10   12.60    1.64
   1   9 -11   83.21    2.88
  -1   9 -10   68.36    2.71
   1  10 -11    4.26    0.92
  -1  10 -10    2.53    0.77
   1  11 -11    8.71    1.22
  -1  11 -10   51.01    2.50
   1  12 -11    0.93    0.64
  -1  12 -10    0.27    0.56
   1  13 -11   11.14    1.45
  -1  13 -10  113.68    3.93
   1  14 -11   20.31    1.81
  -1  14 -10    8.81    1.37
   1  15 -11   88.67    3.66
  -1  15 -10   35.76    2.41
   1  16 -11   36.25    2.48
  -1  16 -10    1.60    0.86
   1  17 -11   15.41    1.75
  -1  17 -10    0.62    0.69
   1  18 -11    3.20    1.12
  -1  18 -10    2.83    1.10
   1  19 -11    9.30    1.66
  -1  19 -10   14.78    2.01
   1  20 -11    2.32    1.05
  -1  20 -10    0.99    0.86
   1  21 -11    0.68    0.93
  -1  21 -10   20.49    2.20
   1  22 -11    0.28    0.87
  -1  22 -10    3.03    1.33
   3  19   9    4.33    1.39
  -3  19  12   -0.07    0.80
   3  18   9   15.03    2.11
  -3  18  12    8.48    1.64
   3  17   9    4.47    1.35
  -3  17  12    0.86    0.89
   3  16   9   29.54    2.43
  -3  16  12    4.31    1.22
   3  15   9    4.61    1.30
  -3  15  12    2.20    0.95
   3  14   9   35.58    2.51
  -3  14  12   49.41    2.93
   3  13   9   16.43    1.76
  -3  13  12    1.56    0.87
   3  12   9    4.26    1.16
  -3  12  12   56.26    2.97
   3  11   9    0.92    0.78
  -3  11  12    6.05    1.24
   3  10   9   34.19    2.21
  -3  10  12   68.24    3.12
   3   9   9   14.41    1.50
  -3   9  12    1.04    0.72
   3  -9 -12    0.86    1.13
   3   8   9  144.30    4.14
  -3   8  12    1.86    0.87
   3  -8 -12    0.45    1.06
  -3  -8  -9   92.29    3.50
   3   7   9   48.10    2.39
  -3   7  12    2.85    0.93
   3  -7 -12    1.71    1.19
  -3  -7  -9   30.75    2.26
   3   6   9    9.62    1.25
  -3   6  12   71.47    2.95
   3  -6 -12   42.23    2.35
  -3  -6  -9    6.84    1.63
   3   5   9   30.27    1.81
  -3   5  12    0.32    0.56
   3  -5 -12    0.58    1.04
  -3  -5  -9   25.67    1.57
  -3  -5  -9   17.40    1.79
   3   4   9    0.68    0.56
  -3   4  12  128.33    3.78
   3  -4 -12   80.21    2.98
  -3  -4  -9    0.24    0.64
  -3  -4  -9    0.42    1.16
   3   3   9   15.25    1.28
  -3   3  12   14.91    1.43
   3  -3 -12   11.74    1.64
  -3  -3  -9   11.81    1.21
  -3  -3  -9    8.72    1.59
   3   2   9  111.85    3.02
  -3   2  12  160.89    4.07
   3  -2 -12  115.25    3.42
  -3  -2  -9   84.56    2.71
  -3  -2  -9   67.68    2.74
   3   1   9   28.90    1.55
  -3   1  12    9.71    1.16
   3  -1 -12    6.72    1.31
  -3  -1  -9   21.40    1.54
  -3  -1  -9   18.71    1.65
   3   0   9   82.82    2.40
  -3   0  12    0.19    0.48
   3   0 -12   -0.47    0.65
  -3   0  -9   60.85    2.38
  -3   0  -9   54.22    2.45
  -3  -1  12    7.04    1.05
   3   1 -12    5.90    1.21
  -3   1  -9   19.07    1.53
  -3   1  -9   18.94    1.61
  -3  -2  12  153.18    3.74
   3   2 -12  135.81    3.70
  -3   2  -9   76.11    2.73
  -3   2  -9   78.03    2.84
  -3  -3  12   12.12    1.19
   3   3 -12   11.23    1.27
  -3   3  -9   12.98    1.37
  -3   3  -9   11.00    1.33
  -3  -4  12  121.38    3.27
   3   4 -12  111.65    3.43
  -3   4  -9    0.86    0.72
  -3   4  -9    0.54    0.80
  -3  -5  12   -0.12    0.47
   3   5 -12   -0.02    0.32
   3   5 -12   -0.47    0.49
  -3   5  -9   22.94    1.70
  -3   5  -9   26.42    1.81
  -3  -6  12   69.05    2.47
   3   6 -12   72.55    2.53
   3   6 -12   65.72    2.76
  -3   6  -9    7.00    1.18
  -3   6  -9    6.21    1.27
   3   7 -12    3.81    0.78
   3   7 -12    2.84    0.97
  -3   7  -9   40.30    2.25
  -3   7  -9   42.26    2.30
   3   8 -12    1.58    0.63
  -3   8  -9  115.75    3.74
  -3   8  -9  123.61    3.76
   3   9 -12    1.14    0.59
  -3   9  -9   12.72    1.47
  -3   9  -9   16.28    1.63
   3  10 -12   70.14    2.89
  -3  10  -9   28.99    2.06
  -3  10  -9   30.11    2.07
   3  11 -12    6.27    1.11
  -3  11  -9   -0.18    0.58
   3  12 -12   64.86    2.97
  -3  12  -9    4.98    1.18
   3  13 -12    2.11    0.85
  -3  13  -9   17.58    1.78
   3  14 -12   57.69    3.00
  -3  14  -9   32.37    2.38
   3  15 -12    2.45    0.99
  -3  15  -9    4.41    1.20
   3  16 -12    2.96    1.02
  -3  16  -9   25.23    2.21
   3  17 -12    0.40    0.68
  -3  17  -9    3.66    1.19
   3  18 -12    6.69    1.43
  -3  18  -9   16.24    1.97
   3  19 -12    0.41    0.70
  -3  19  -9    4.85    1.40
   3  20 -12   36.63    2.87
  -3  20  -9    0.57    0.92
   3  21 -12   -0.54    0.71
  -3  21  -9    0.77    0.99
   5  16   8    1.49    1.08
  -5  16  13   10.27    1.91
   5  15   8    1.04    1.00
  -5  15  13   32.03    2.70
   5  14   8   23.44    2.28
  -5  14  13   22.52    2.27
   5  13   8   13.10    1.91
  -5  13  13    5.54    1.39
   5  12   8   65.49    3.44
  -5  12  13    6.55    1.45
   5  11   8    8.56    1.58
  -5  11  13   16.93    1.87
   5  10   8   79.50    3.60
  -5  10  13   16.35    1.82
   5   9   8   18.55    1.86
  -5   9  13   28.72    2.28
   5   8   8    5.89    1.30
  -5   8  13   61.89    3.21
   5   7   8    2.39    0.93
  -5   7  13   97.29    3.92
   5   6   8   29.97    2.10
  -5   6  13   48.16    2.77
   5   5   8    1.31    0.83
  -5   5  13   21.80    1.92
  -5  -5  -8    0.24    0.73
   5   4   8   38.81    2.24
  -5   4  13   26.30    2.06
  -5  -4  -8   31.69    2.12
   5   3   8   35.27    2.09
  -5   3  13    6.64    1.27
  -5  -3  -8   26.85    1.98
   5   2   8   15.36    1.44
  -5   2  13   23.35    1.90
  -5  -2  -8   10.10    1.47
  -5   1  13   23.06    1.87
  -5  -1  -8   -0.58    0.67
  -5   0  13   21.16    1.77
  -5   0  -8    0.07    0.76
  -5  -1  13   23.97    1.87
  -5   1  -8    1.45    0.93
  -5  -2  13   26.88    1.96
  -5   2  -8   10.32    1.53
  -5  -3  13    7.05    1.24
  -5   3  -8   25.44    2.05
  -5  -4  13   27.82    1.97
  -5   4  -8   27.55    2.18
  -5  -5  13   24.37    1.87
  -5   5  -8    1.71    1.02
  -5  -6  13   52.64    2.65
  -5   6  -8   20.06    1.98
  -5  -7  13   90.91    3.45
  -5   7  -8    1.82    1.07
  -5  -8  13   63.70    2.93
  -5   8  -8    3.62    1.21
   5   9 -13   30.22    2.08
  -5   9  -8   15.04    1.88
   5  10 -13   17.88    1.69
  -5  10  -8   55.96    3.15
   5  11 -13   15.60    1.65
  -5  11  -8    4.70    1.36
   5  12 -13    7.12    1.32
  -5  12  -8   46.83    3.00
   5  13 -13    2.38    0.96
  -5  13  -8    9.62    1.73
   5  14 -13   19.28    1.96
  -5  14  -8   17.63    2.01
   5  15 -13   27.06    2.33
  -5  15  -8    0.83    0.97
   5  16 -13    8.46    1.59
  -5  16  -8    1.29    1.14
   5  17 -13   13.36    1.97
   5  18 -13   11.44    1.88
  -5  18  -8   -0.02    0.97
   7  11   7    3.71    1.41
   7  10   7    0.23    1.07
  -7   9  14    1.88    1.08
   7   8   7    2.94    1.20
  -7   8  14    0.21    0.85
  -7   7  14   17.00    1.99
   7   6   7    1.47    1.07
  -7   6  14   -0.41    0.61
   7   5   7   -0.33    0.84
  -7   5  14   31.58    2.56
  -7   4  14    1.57    0.97
  -7  -4  -7    2.79    1.08
  -7   3  14   55.66    3.30
  -7  -3  -7    7.71    1.52
  -7   2  14    1.66    0.99
  -7  -2  -7    1.24    1.03
  -7   1  14    7.02    1.47
  -7  -1  -7   19.51    2.06
  -7   0  14    0.10    0.71
  -7   0  -7    3.01    1.21
  -7  -1  14    6.45    1.39
  -7   1  -7   16.41    1.95
  -7  -2  14    1.08    0.87
  -7   2  -7    2.88    1.22
  -7  -3  14   44.33    2.88
  -7   3  -7    7.22    1.54
  -7  -4  14    0.70    0.84
  -7   4  -7    3.32    1.29
  -7  -5  14   26.68    2.28
  -7   5  -7    0.11    0.96
  -7  -6  14    0.28    0.75
  -7   6  -7    1.46    1.08
  -7  -7  14   15.88    1.85
  -7   7  -7    8.62    1.76
   7   8 -14   -0.58    0.78
   7   8 -14    0.51    0.88
  -7   8  -7    1.56    1.21
   7   9 -14    0.96    0.95
   7   9 -14    0.43    0.77
  -7   9  -7    8.53    1.83
   7  10 -14    2.85    1.27
  -7  10  -7   -0.55    1.04
  -7  11  -7    1.82    1.33
  -7  12  -7   -0.67    0.99
   0  20  11   18.04    2.14
   0  19  11   13.61    2.06
   0  18  11    1.38    1.01
   0  17  11    3.68    1.20
   0  16  11    0.77    0.81
   0  15  11    6.11    1.33
   0  14  11   14.58    1.69
   0  13  11  154.29    4.76
   0  12  11   22.24    1.89
   0  11  11    9.17    1.38
   0  10  11   10.24    1.40
   0 -10 -11    7.30    1.73
   0   9  11   28.99    1.95
   0  -9 -11   18.98    1.98
   0   8  11   12.90    1.35
   0  -8 -11    7.82    1.64
   0   7  11   36.73    2.05
   0  -7 -11   21.51    1.92
   0   6  11   42.20    2.10
   0  -6 -11   26.07    1.97
   0   5  11   76.36    2.71
   0  -5 -11   42.04    2.32
   0   4  11   52.62    2.20
   0  -4 -11   29.94    1.99
   0   3  11  123.27    3.16
   0  -3 -11   79.40    2.97
   0   2  11   42.19    1.84
   0  -2 -11   28.03    1.87
   0   1  11   16.40    1.19
   0  -1 -11   12.62    1.39
   0   0  11    0.47    0.46
   0   0 -11    0.36    0.73
   0  -1  11   16.49    1.08
   0   1 -11   11.67    1.30
   0  -2  11   39.79    1.51
   0   2 -11   40.77    1.54
   0   2 -11   30.40    1.90
   0   3 -11  132.36    2.84
   0   3 -11  104.53    3.32
   0   4 -11   52.30    1.90
   0   4 -11   41.33    2.18
   0   5 -11   77.64    2.41
   0   5 -11   63.48    2.67
   0   6 -11   43.35    1.91
   0   6 -11   33.87    2.05
   0   7 -11   37.51    1.87
   0   7 -11   33.07    2.05
   0   8 -11   12.30    1.22
   0   8 -11   12.04    1.44
   0   9 -11   27.19    1.75
   0  10 -11    9.81    1.17
   0  11 -11    9.25    1.27
   0  12 -11   22.66    1.78
   0  13 -11  154.97    4.57
   0  14 -11   10.88    1.53
   0  15 -11    6.39    1.27
   0  16 -11    1.05    0.81
   0  17 -11    3.99    1.16
   0  18 -11    3.21    1.12
   0  19 -11   16.57    1.93
   0  20 -11   18.70    2.08
   0  21 -11   11.52    1.95
   0  22 -11    9.45    1.86
   2  20  10    1.15    1.09
  -2  20  12    0.20    0.96
   2  19  10    1.04    0.99
  -2  19  12    7.46    1.65
   2  18  10   22.90    2.25
  -2  18  12    3.59    1.27
   2  17  10    0.39    0.86
  -2  17  12   32.93    2.56
   2  16  10   28.27    2.34
  -2  16  12   12.33    1.85
   2  15  10   -0.08    0.72
  -2  15  12   34.88    2.52
   2  14  10   35.87    2.49
  -2  14  12    3.13    1.12
   2  13  10   -0.01    0.66
  -2  13  12   -0.04    0.68
   2  12  10   18.06    1.73
  -2  12  12   21.84    1.90
   2  11  10    3.58    1.01
  -2  11  12   26.26    2.04
   2  10  10   34.32    2.18
  -2  10  12    2.88    0.93
   2 -10 -12   -0.27    1.12
   2   9  10    0.65    0.68
  -2   9  12  225.79    5.35
   2  -9 -12  147.50    4.35
  -2  -9 -10    0.30    1.29
   2   8  10  275.48    5.60
  -2   8  12   11.19    1.34
   2  -8 -12    8.46    1.72
  -2  -8 -10  169.05    4.67
   2   7  10   28.27    1.86
  -2   7  12  110.09    3.59
   2  -7 -12   69.07    2.97
  -2  -7 -10   18.26    1.98
   2   6  10   58.06    2.49
  -2   6  12    2.89    0.81
   2  -6 -12    2.60    1.23
  -2  -6 -10   32.43    2.22
   2   5  10   27.14    1.71
  -2   5  12   16.09    1.42
   2  -5 -12   14.83    1.91
  -2  -5 -10   14.76    1.70
   2   4  10   49.84    2.17
  -2   4  12   16.87    1.41
   2  -4 -12   13.00    1.53
  -2  -4 -10   26.44    1.99
   2   3  10   16.22    1.29
  -2   3  12   14.52    1.30
   2  -3 -12   11.77    1.64
  -2  -3 -10   11.38    1.76
   2   2  10   63.44    2.24
  -2   2  12    0.47    0.51
   2  -2 -12    2.52    1.04
  -2  -2 -10   51.18    1.92
  -2  -2 -10   42.39    2.28
   2   1  10   36.81    1.67
  -2   1  12   96.30    2.95
   2  -1 -12   71.04    2.77
  -2  -1 -10   25.42    1.48
  -2  -1 -10   24.05    1.80
   2   0  10  204.71    3.60
  -2   0  12    9.81    1.10
   2   0 -12   10.52    1.49
  -2   0 -10  136.56    3.15
  -2   0 -10  129.42    3.67
  -2  -1  12   93.98    2.79
   2   1 -12   74.53    2.81
  -2   1 -10   24.13    1.53
  -2   1 -10   24.62    1.78
  -2  -2  12    0.58    0.53
   2   2 -12    0.39    0.67
  -2   2 -10   50.03    2.07
  -2   2 -10   48.51    2.33
  -2  -3  12   13.85    1.14
   2   3 -12   11.63    1.26
  -2   3 -10   12.46    1.22
  -2   3 -10   12.77    1.39
  -2  -4  12   16.89    1.22
   2   4 -12   17.38    1.50
  -2   4 -10   42.29    2.01
  -2   4 -10   39.33    2.16
   2   5 -12   14.88    1.14
   2   5 -12   12.90    1.35
  -2   5 -10   21.69    1.55
  -2   5 -10   21.27    1.69
   2   6 -12    3.23    0.70
   2   6 -12    3.31    0.99
  -2   6 -10   52.92    2.34
  -2   6 -10   48.14    2.43
   2   7 -12  115.30    3.20
   2   7 -12   97.15    3.42
  -2   7 -10   27.26    1.81
  -2   7 -10   23.16    1.87
   2   8 -12   10.61    1.16
   2   8 -12    9.44    1.52
  -2   8 -10  256.32    5.29
  -2   8 -10  242.44    5.33
   2   9 -12  231.75    4.90
  -2   9 -10    0.18    0.57
  -2   9 -10    1.10    0.91
   2  10 -12    1.79    0.72
  -2  10 -10   35.05    2.16
  -2  10 -10   31.89    2.18
   2  11 -12   27.63    1.88
  -2  11 -10    2.97    0.92
   2  12 -12   19.38    1.68
  -2  12 -10   18.62    1.71
   2  13 -12    0.68    0.64
  -2  13 -10   -0.40    0.50
   2  14 -12    2.15    0.89
  -2  14 -10   33.82    2.35
   2  15 -12   34.97    2.43
  -2  15 -10   -0.52    0.49
   2  16 -12    9.85    1.58
  -2  16 -10   30.28    2.36
   2  17 -12   37.44    2.64
  -2  17 -10    0.61    0.81
   2  18 -12    4.88    1.31
  -2  18 -10   23.20    2.21
   2  19 -12    9.27    1.70
  -2  19 -10    1.80    1.09
   2  20 -12    0.66    0.85
  -2  20 -10    0.66    0.93
   2  21 -12    6.63    1.62
  -2  21 -10    1.98    1.15
   4  17   9    0.73    0.98
  -4  17  13    0.73    0.93
   4  16   9    0.94    1.00
  -4  16  13    0.89    0.87
   4  15   9    0.50    0.80
  -4  15  13    0.20    0.78
   4  14   9   24.40    2.22
  -4  14  13   29.67    2.45
   4  13   9   19.95    2.00
  -4  13  13    8.12    1.52
   4  12   9   19.98    1.96
  -4  12  13   28.21    2.28
   4  11   9    6.14    1.35
  -4  11  13   11.14    1.67
   4  10   9    0.74    0.80
  -4  10  13   -0.04    0.67
   4   9   9    0.58    0.73
  -4   9  13    3.22    1.05
   4  -9 -13    3.41    1.39
   4   8   9   23.47    1.90
  -4   8  13   10.77    1.58
   4  -8 -13    7.80    1.63
   4   7   9   30.91    2.07
  -4   7  13    1.15    0.80
   4  -7 -13   -0.87    0.99
  -4  -7  -9   18.11    1.88
   4   6   9   18.62    1.63
  -4   6  13   96.46    3.68
   4  -6 -13   60.56    2.75
  -4  -6  -9   12.01    1.92
   4   5   9   29.11    1.92
  -4   5  13   32.02    2.19
   4  -5 -13   21.97    1.88
  -4  -5  -9   23.55    1.69
  -4  -5  -9   16.57    1.81
   4   4   9   56.65    2.51
  -4   4  13  146.16    4.37
   4  -4 -13   96.09    3.32
  -4  -4  -9   41.75    2.17
  -4  -4  -9   30.95    2.18
   4   3   9   49.93    2.31
  -4   3  13   14.24    1.50
   4  -3 -13   13.65    1.79
  -4  -3  -9   37.41    2.10
  -4  -3  -9   25.78    2.02
   4   2   9   17.31    1.42
  -4   2  13   26.03    1.87
   4  -2 -13   20.06    1.73
  -4  -2  -9   10.80    1.40
  -4  -2  -9    9.94    1.78
  -4   1  13    0.35    0.56
   4  -1 -13   -0.10    0.78
  -4  -1  -9   18.15    1.59
  -4  -1  -9   13.90    1.65
  -4   0  13    1.30    0.71
   4   0 -13    0.34    0.84
  -4   0  -9    0.22    0.70
  -4   0  -9   -0.25    0.98
  -4  -1  13    0.18    0.59
   4   1 -13    0.27    0.77
  -4   1  -9   18.50    1.66
  -4   1  -9   15.37    1.63
   4   2 -13   23.39    1.75
  -4   2  -9   11.77    1.46
  -4   2  -9   10.26    1.58
  -4  -3  13   14.92    1.43
   4   3 -13   12.02    1.37
  -4   3  -9   34.74    2.18
  -4   3  -9   33.62    2.08
  -4  -4  13  141.20    3.94
   4   4 -13  131.03    3.84
  -4   4  -9   36.23    2.24
  -4   4  -9   39.19    2.19
  -4  -5  13   29.10    1.88
   4   5 -13   29.47    1.97
  -4   5  -9   22.33    1.89
  -4   5  -9   22.71    1.79
  -4  -6  13   97.27    3.27
   4   6 -13   94.15    3.39
  -4   6  -9   13.21    1.56
  -4   6  -9   12.23    1.47
  -4  -7  13    1.80    0.76
   4   7 -13    2.63    1.04
  -4   7  -9   21.34    1.88
  -4   7  -9   22.29    1.81
   4   8 -13   10.48    1.24
   4   8 -13   10.14    1.59
  -4   8  -9   19.28    1.85
  -4   8  -9   20.88    1.79
   4   9 -13    2.37    0.80
   4   9 -13    1.91    0.97
  -4   9  -9    0.98    0.86
  -4   9  -9    0.72    0.83
   4  10 -13    0.28    0.55
  -4  10  -9   -0.16    0.70
  -4  10  -9    0.21    0.78
   4  11 -13   13.90    1.51
  -4  11  -9    4.78    1.23
  -4  11  -9    7.10    1.46
   4  12 -13   32.05    2.24
  -4  12  -9   13.93    1.72
   4  13 -13   10.04    1.51
  -4  13  -9   13.90    1.73
   4  14 -13   32.78    2.38
  -4  14  -9   15.66    1.88
   4  15 -13   -0.18    0.58
  -4  15  -9    0.42    0.86
   4  16 -13    0.67    0.76
  -4  16  -9   -0.03    0.77
   4  17 -13    0.18    0.67
  -4  17  -9    0.61    0.94
   4  18 -13   12.39    1.91
  -4  18  -9    6.73    1.66
   4  19 -13    2.07    1.09
  -4  19  -9    9.92    1.88
   6  14   8    0.85    1.07
   6  13   8    1.45    1.09
  -6  13  14    2.36    1.22
   6  12   8    1.40    1.01
  -6  12  14    0.27    0.82
   6  11   8   10.83    1.80
  -6  11  14    7.39    1.60
   6  10   8    2.07    1.06
  -6  10  14   23.14    2.26
   6   9   8   18.51    1.96
  -6   9  14   10.22    1.76
   6   8   8    2.11    1.06
  -6   8  14   61.84    3.43
   6   7   8   32.81    2.41
  -6   7  14    0.73    0.83
   6   6   8   -0.22    0.76
  -6   6  14    8.01    1.48
  -6   5  14    3.90    1.16
  -6  -5  -8   14.16    1.67
  -6   4  14    3.48    1.11
  -6  -4  -8    0.79    0.88
  -6   3  14   12.55    1.74
  -6  -3  -8    3.20    1.12
  -6   2  14   26.79    2.18
  -6  -2  -8    0.73    0.91
  -6   1  14    7.65    1.44
  -6  -1  -8   40.29    2.61
  -6   0  14   59.90    3.14
  -6   0  -8    2.41    1.11
  -6  -1  14    6.94    1.36
  -6   1  -8   42.33    2.71
  -6  -2  14   27.83    2.17
  -6   2  -8   -0.05    0.86
  -6  -3  14   10.79    1.61
  -6   3  -8    3.02    1.19
  -6  -4  14    4.95    1.16
  -6   4  -8   -0.26    0.83
  -6  -5  14    4.08    1.09
  -6   5  -8   11.51    1.82
  -6  -6  14    6.84    1.36
  -6   6  -8   -0.73    0.80
  -6  -7  14    0.81    0.82
  -6   7  -8   21.07    2.14
  -6  -8  14   69.82    3.34
  -6   8  -8    1.41    1.12
  -6   9  -8    9.99    1.83
  -6  10  -8    0.85    1.14
  -6  11  -8    5.83    1.65
  -6  12  -8   -0.10    0.93
   6  13 -14    0.93    0.86
  -6  13  -8    0.17    1.13
   6  14 -14   12.54    1.88
  -6  14  -8    0.16    1.12
   6  15 -14    0.44    0.83
  -6  15  -8   10.32    2.03
  -8  -3  -7    2.55    1.23
  -8  -2  -7    5.43    1.47
  -8  -1  -7   -0.04    0.85
  -8   0  -7   -0.11    0.89
  -8   1  -7   -0.28    0.86
  -8   2  -7    3.33    1.34
  -8   3  -7    3.57    1.37
  -8   4  -7    6.03    1.59
  -8   5  -7    3.17    1.37
  -8   6  -7    1.14    1.16
   1  20  11    2.26    1.17
  -1  20  12   15.63    2.22
   1  19  11    0.95    0.98
  -1  19  12   19.95    2.18
   1  18  11   26.21    2.38
  -1  18  12    4.86    1.33
   1  17  11   15.13    2.01
  -1  17  12    1.14    0.90
   1  16  11   22.66    2.14
  -1  16  12    5.15    1.33
   1  15  11    4.55    1.25
  -1  15  12    0.13    0.71
   1  14  11   14.75    1.69
  -1  14  12   50.87    2.94
   1  13  11   -0.11    0.63
  -1  13  12   19.80    1.91
   1  12  11   25.63    2.02
  -1  12  12   86.03    3.58
   1  11  11    0.95    0.73
  -1  11  12   21.76    1.86
   1 -11 -12   16.49    1.91
   1  10  11   14.08    1.49
  -1  10  12   44.22    2.48
   1 -10 -12   30.59    2.34
  -1 -10 -11   10.35    1.92
   1   9  11    1.25    0.72
  -1   9  12    3.55    0.96
   1  -9 -12    4.46    1.54
  -1  -9 -11    0.11    1.16
   1   8  11  200.64    4.79
  -1   8  12    0.53    0.62
   1  -8 -12    0.77    1.21
  -1  -8 -11  118.20    3.99
   1   7  11    1.27    0.69
  -1   7  12  118.90    3.67
   1  -7 -12   69.98    3.05
  -1  -7 -11    0.60    1.15
   1   6  11   10.20    1.19
  -1   6  12   42.71    2.21
   1  -6 -12   25.45    2.03
  -1  -6 -11    6.88    1.63
   1   5  11    0.33    0.51
  -1   5  12   23.22    1.63
   1  -5 -12   14.04    1.64
  -1  -5 -11    0.57    1.07
   1   4  11    7.70    1.06
  -1   4  12   77.64    2.75
   1  -4 -12   45.24    2.41
  -1  -4 -11    3.22    1.29
   1   3  11   10.59    1.13
  -1   3  12   12.53    1.20
   1  -3 -12   11.27    1.64
  -1  -3 -11    6.64    1.47
   1   2  11  107.21    2.90
  -1   2  12   22.98    1.48
   1  -2 -12   15.49    1.54
  -1  -2 -11   67.46    2.83
   1   1  11   22.81    1.40
  -1   1  12    0.94    0.52
   1  -1 -12    1.75    0.93
  -1  -1 -11   12.19    1.69
   1   0  11  206.10    3.65
  -1   0  12    0.06    0.43
   1   0 -12   -0.08    0.64
  -1   0 -11  139.71    3.90
  -1  -1  12    1.12    0.56
   1   1 -12    1.35    0.81
  -1   1 -11   15.11    1.52
  -1  -2  12   23.95    1.37
   1   2 -12   19.34    1.58
  -1   2 -11   91.32    2.49
  -1   2 -11   76.75    2.92
   1   3 -12    9.89    1.21
  -1   3 -11    8.35    0.96
  -1   3 -11    8.38    1.39
   1   4 -12   64.24    2.73
  -1   4 -11    7.17    0.94
  -1   4 -11    4.84    1.12
   1   5 -12   23.83    1.40
   1   5 -12   19.32    1.65
  -1   5 -11    0.31    0.48
  -1   5 -11    0.80    0.77
   1   6 -12   42.20    1.90
   1   6 -12   36.23    2.17
  -1   6 -11   10.46    1.11
  -1   6 -11    9.87    1.48
   1   7 -12  128.30    3.38
   1   7 -12  105.32    3.62
  -1   7 -11    0.53    0.54
  -1   7 -11    0.96    0.85
   1   8 -12    0.21    0.45
   1   8 -12   -0.28    0.66
  -1   8 -11  195.55    4.47
  -1   8 -11  171.84    4.59
   1   9 -12    4.08    0.92
  -1   9 -11    1.10    0.65
  -1   9 -11    1.15    0.90
   1  10 -12   46.21    2.33
  -1  10 -11   13.48    1.36
   1  11 -12   23.15    1.78
  -1  11 -11    1.06    0.65
   1  12 -12   95.05    3.52
  -1  12 -11   24.35    1.91
   1  13 -12   19.05    1.75
  -1  13 -11    0.32    0.69
   1  14 -12   50.14    2.76
  -1  14 -11   15.16    1.64
   1  15 -12   -0.42    0.54
  -1  15 -11    5.92    1.23
   1  16 -12    5.34    1.27
  -1  16 -11   17.93    1.86
   1  17 -12    1.14    0.84
  -1  17 -11   14.71    1.77
   1  18 -12    5.38    1.34
  -1  18 -11   24.18    2.24
   1  19 -12   21.67    2.19
  -1  19 -11    0.26    0.80
   1  20 -12   13.15    1.99
  -1  20 -11    1.97    1.07
   1  21 -12   12.97    2.05
  -1  21 -11    1.29    1.07
   3  18  10    1.08    1.03
  -3  18  13   -0.04    0.79
   3  17  10    2.72    1.25
  -3  17  13   22.18    2.23
   3  16  10    0.25    0.91
  -3  16  13    2.67    1.09
   3  15  10    7.44    1.53
  -3  15  13   33.02    2.53
   3  14  10    2.13    1.03
  -3  14  13    0.21    0.72
   3  13  10   35.72    2.51
  -3  13  13    0.23    0.67
   3  12  10   13.22    1.61
  -3  12  13    0.44    0.70
   3  11  10   18.86    1.81
  -3  11  13    8.42    1.46
   3  10  10   14.18    1.56
  -3  10  13    6.48    1.30
   3 -10 -13    7.31    1.72
   3   9  10    0.00    0.53
  -3   9  13   68.58    3.17
   3  -9 -13   52.20    2.79
  -3  -9 -10   -0.29    1.14
   3   8  10    1.42    0.77
  -3   8  13    7.28    1.30
   3  -8 -13    5.68    1.58
  -3  -8 -10    0.75    1.25
   3   7  10   76.23    3.05
  -3   7  13   87.59    3.42
   3  -7 -13   61.79    2.90
  -3  -7 -10   43.89    2.62
   3   6  10    2.90    0.88
  -3   6  13    0.87    0.70
   3  -6 -13    0.91    1.09
  -3  -6 -10    1.18    1.30
   3   5  10  111.29    3.43
  -3   5  13   29.96    2.01
   3  -5 -13   18.45    1.79
  -3  -5 -10   63.21    2.93
   3   4  10    8.64    1.17
  -3   4  13   23.08    1.78
   3  -4 -13   13.92    1.63
  -3  -4 -10    5.35    1.54
   3   3  10   39.17    1.99
  -3   3  13   71.99    2.91
   3  -3 -13   48.73    2.50
  -3  -3 -10   23.93    1.99
   3   2  10   31.49    1.74
  -3   2  13    2.92    0.92
   3  -2 -13    2.82    1.16
  -3  -2 -10   25.32    1.66
  -3  -2 -10   18.51    1.76
  -3   1  13  152.54    4.03
   3  -1 -13  110.10    3.52
  -3  -1 -10   24.96    1.67
  -3  -1 -10   19.85    1.79
  -3   0  13   21.49    1.61
   3   0 -13   18.01    1.64
  -3   0 -10   -0.13    0.63
  -3   0 -10   -0.03    0.91
  -3  -1  13  150.26    3.88
   3   1 -13  120.03    3.66
  -3   1 -10   23.10    1.67
  -3   1 -10   18.59    1.69
  -3  -2  13    2.99    0.83
   3   2 -13    2.80    1.05
  -3   2 -10   24.65    1.74
  -3   2 -10   21.92    1.78
  -3  -3  13   71.28    2.64
   3   3 -13   56.24    2.59
  -3   3 -10   28.09    1.85
  -3   3 -10   29.72    1.97
  -3  -4  13   24.53    1.61
   3   4 -13   18.82    1.62
  -3   4 -10    6.20    1.14
  -3   4 -10    5.90    1.35
  -3  -5  13   28.90    1.72
   3   5 -13   25.32    1.87
  -3   5 -10   82.47    3.08
  -3   5 -10   87.17    3.22
   3   6 -13    0.44    0.73
  -3   6 -10    2.08    0.86
  -3   6 -10    2.51    1.10
   3   7 -13   84.73    3.32
  -3   7 -10   54.25    2.63
  -3   7 -10   61.27    2.78
   3   8 -13    8.49    1.14
   3   8 -13    6.55    1.38
  -3   8 -10    1.01    0.72
  -3   8 -10    1.13    0.83
   3   9 -13   78.70    3.01
   3   9 -13   71.04    3.20
  -3   9 -10    0.35    0.66
  -3   9 -10    0.05    0.72
   3  10 -13    9.43    1.29
  -3  10 -10   12.95    1.51
  -3  10 -10   16.20    1.68
   3  11 -13    9.20    1.30
  -3  11 -10   17.59    1.74
  -3  11 -10   18.53    1.81
   3  12 -13    0.55    0.61
  -3  12 -10   15.38    1.73
  -3  12 -10   13.60    1.69
   3  13 -13    0.37    0.61
  -3  13 -10   33.87    2.44
   3  14 -13    0.66    0.69
  -3  14 -10    1.64    0.95
   3  15 -13   35.63    2.51
  -3  15 -10    5.62    1.37
   3  16 -13    1.56    0.87
  -3  16 -10    0.53    0.80
   3  17 -13   22.24    2.15
  -3  17 -10    1.31    0.98
   3  18 -13    1.22    0.90
  -3  18 -10   -0.42    0.74
   3  19 -13    8.30    1.67
  -3  19 -10   11.60    1.95
   3  20 -13    0.75    0.90
  -3  20 -10    8.57    1.79
   5  15   9   14.30    2.09
  -5  15  14   11.79    2.00
   5  14   9    0.11    0.92
  -5  14  14    7.31    1.66
   5  13   9   -0.45    0.74
  -5  13  14   52.63    3.31
   5  12   9    0.42    0.87
  -5  12  14   26.86    2.39
   5  11   9   10.40    1.70
  -5  11  14   19.44    2.06
   5  10   9    7.83    1.50
  -5  10  14    8.30    1.56
   5   9   9   45.79    2.77
  -5   9  14    2.06    1.03
   5   8   9   28.59    2.21
  -5   8  14    1.76    0.94
   5   7   9   41.51    2.52
  -5   7  14   10.82    1.63
   5   6   9    3.96    1.08
  -5   6  14   26.86    2.18
   5   5   9    9.57    1.42
  -5   5  14   14.84    1.69
  -5  -5  -9    7.39    1.31
   5   4   9    0.22    0.69
  -5   4  14   58.46    3.04
  -5  -4  -9    0.33    0.78
  -5   3  14    8.75    1.45
  -5  -3  -9    0.64    0.81
  -5   2  14    4.28    1.11
  -5  -2  -9    0.78    0.82
  -5   1  14   14.10    1.55
  -5  -1  -9   15.38    1.67
  -5   0  14   -0.18    0.48
  -5   0  -9   31.64    2.23
  -5  -1  14   15.02    1.58
  -5   1  -9   12.12    1.65
  -5  -2  14    3.88    1.03
  -5   2  -9    1.79    1.00
  -5  -3  14   11.26    1.53
  -5   3  -9   -0.48    0.75
  -5  -4  14   67.05    3.04
  -5   4  -9   -0.59    0.76
  -5  -5  14   16.31    1.61
  -5   5  -9    7.55    1.51
  -5  -6  14   26.01    1.97
  -5   6  -9    2.80    1.09
  -5  -7  14    8.85    1.40
  -5   7  -9   26.39    2.28
  -5   8  -9   16.46    1.94
  -5   9  -9   29.40    2.39
  -5  10  -9    5.75    1.49
  -5  11  -9    7.24    1.57
   5  12 -14   30.40    2.31
  -5  12  -9   -0.43    0.79
   5  13 -14   51.41    3.02
  -5  13  -9    1.32    1.05
   5  14 -14    5.52    1.31
  -5  14  -9   -0.63    0.78
   5  15 -14    9.39    1.66
  -5  15  -9   13.40    2.08
   5  16 -14    1.06    0.92
  -5  16  -9    2.34    1.23
  -5  17  -9    7.91    1.76
   7  10   8    3.16    1.29
   7   9   8    0.08    0.93
   7   8   8    1.08    1.06
  -7   8  15   36.70    2.89
   7   7   8    1.99    1.10
  -7   7  15    0.86    0.92
  -7   6  15    9.20    1.68
  -7   5  15    1.42    0.98
  -7   4  15    0.54    0.85
  -7  -4  -8   14.85    1.84
  -7   3  15    0.26    0.79
  -7  -3  -8    2.79    1.14
  -7   2  15   23.33    2.23
  -7  -2  -8    3.44    1.20
  -7   1  15    0.21    0.74
  -7  -1  -8    0.62    0.90
  -7   0  15   28.62    2.42
  -7   0  -8   -0.29    0.76
  -7  -1  15    0.83    0.80
  -7   1  -8    0.11    0.86
  -7  -2  15   23.45    2.21
  -7   2  -8    3.18    1.24
  -7  -3  15    0.66    0.79
  -7   3  -8    3.77    1.34
  -7  -4  15    0.61    0.79
  -7   4  -8   17.21    2.07
  -7  -5  15    0.76    0.87
  -7   5  -8    1.77    1.17
  -7  -6  15    8.97    1.64
  -7   6  -8   10.38    1.84
  -7  -7  15   -0.33    0.72
  -7   7  -8    1.65    1.17
  -7   8  -8    0.51    1.09
   7   9 -15    0.49    0.92
  -7   9  -8   -0.19    1.12
  -7  10  -8    0.69    1.25
  -7  11  -8    0.08    1.09
   0  19  12    9.75    1.83
   0  18  12   19.98    2.18
   0  17  12   12.11    1.88
   0  16  12   38.08    2.71
   0  15  12   15.29    1.81
   0  14  12   14.83    1.74
   0  13  12   21.26    1.96
   0  12  12    3.24    1.06
   0  11  12    6.28    1.24
   0 -11 -12    6.74    1.71
   0  10  12   16.56    1.63
   0 -10 -12   15.27    2.20
   0   9  12   21.85    1.79
   0  -9 -12   13.88    2.09
   0   8  12   91.80    3.36
   0  -8 -12   51.69    2.85
   0   7  12   56.48    2.60
   0  -7 -12   32.68    2.35
   0   6  12   18.15    1.52
   0  -6 -12   12.65    1.91
   0   5  12    7.53    1.12
   0  -5 -12    4.62    1.43
   0   4  12   12.34    1.24
   0  -4 -12    7.88    1.53
   0   3  12   22.54    1.53
   0  -3 -12   14.14    1.57
   0   2  12   62.54    2.31
   0  -2 -12   39.72    2.27
   0   1  12   32.72    1.66
   0  -1 -12   19.19    1.72
   0   0  12  175.45    3.51
   0   0 -12  122.46    3.73
   0  -1  12   31.09    1.48
   0   1 -12   22.66    1.76
   0   2 -12   47.84    2.42
   0   3 -12   16.91    1.57
   0   4 -12   12.04    1.40
   0   5 -12    7.89    0.97
   0   5 -12    6.40    1.32
   0   6 -12   17.13    1.30
   0   6 -12   16.61    1.58
   0   7 -12   53.13    2.26
   0   7 -12   48.08    2.53
   0   8 -12   93.28    3.08
   0   8 -12   82.05    3.30
   0   9 -12   18.37    1.51
   0   9 -12   17.48    1.70
   0  10 -12   17.49    1.51
   0  11 -12    6.13    1.12
   0  12 -12    5.04    1.10
   0  13 -12   20.26    1.80
   0  14 -12   15.44    1.66
   0  15 -12   18.91    1.85
   0  16 -12   40.98    2.69
   0  17 -12    9.51    1.59
   0  18 -12   24.45    2.26
   0  19 -12    7.84    1.59
   0  20 -12    1.30    0.98
   0  21 -12   -0.06    0.80
   2  19  11    7.02    1.62
  -2  19  13    0.54    1.01
   2  18  11   -0.16    0.75
  -2  18  13   10.24    1.88
   2  17  11    1.42    1.05
  -2  17  13    1.31    1.02
   2  16  11    2.64    1.10
  -2  16  13    2.66    1.13
   2  15  11   18.70    1.96
  -2  15  13    1.06    0.89
   2  14  11    0.74    0.86
  -2  14  13   74.86    3.61
   2  13  11   71.41    3.42
  -2  13  13    3.65    1.14
   2  12  11    0.46    0.73
  -2  12  13   63.94    3.21
   2  11  11   39.92    2.47
  -2  11  13    5.91    1.29
   2 -11 -13    6.11    1.70
   2  10  11    2.53    0.95
  -2  10  13    5.24    1.14
   2 -10 -13    4.24    1.59
  -2 -10 -11    1.46    1.38
   2   9  11   14.24    1.48
  -2   9  13   19.42    1.76
   2  -9 -13   17.38    2.27
  -2  -9 -11    8.47    1.84
   2   8  11    0.68    0.67
  -2   8  13    0.79    0.70
   2  -8 -13   -0.76    1.01
  -2  -8 -11   -1.15    1.09
   2   7  11   12.76    1.39
  -2   7  13    6.70    1.18
   2  -7 -13    4.86    1.53
  -2  -7 -11    7.37    1.76
   2   6  11   12.31    1.31
  -2   6  13   31.46    2.00
   2  -6 -13   18.88    1.91
  -2  -6 -11    6.83    1.69
   2   5  11  123.25    3.55
  -2   5  13    0.78    0.62
   2  -5 -13    0.71    1.10
  -2  -5 -11   68.68    3.06
   2   4  11    1.19    0.63
  -2   4  13  195.39    4.59
   2  -4 -13  121.12    3.82
  -2  -4 -11    0.35    1.15
   2   3  11   66.98    2.48
  -2   3  13   45.57    2.24
   2  -3 -13   31.28    2.11
  -2  -3 -11   36.95    2.29
   2   2  11    9.99    1.10
  -2   2  13   20.00    1.53
   2  -2 -13   14.94    1.58
  -2  -2 -11    6.33    1.50
   2   1  11   26.97    1.53
  -2   1  13   -0.07    0.47
   2  -1 -13   -0.43    0.69
  -2  -1 -11   17.12    1.73
  -2   0  13   -0.04    0.46
   2   0 -13    0.46    0.82
  -2   0 -11    0.03    0.86
  -2  -1  13   -0.22    0.46
   2   1 -13   -0.26    0.69
  -2   1 -11   18.07    1.40
  -2   1 -11   17.43    1.64
  -2  -2  13   20.33    1.42
   2   2 -13   17.36    1.62
  -2   2 -11    6.33    1.03
  -2   2 -11    7.16    1.44
  -2  -3  13   43.12    1.95
   2   3 -13   34.97    2.14
  -2   3 -11   49.50    2.16
  -2   3 -11   44.60    2.39
   2   4 -13  159.23    4.35
  -2   4 -11    1.75    0.69
  -2   4 -11   -0.20    0.84
   2   5 -13    1.01    0.88
  -2   5 -11  105.77    3.24
  -2   5 -11   97.56    3.45
   2   6 -13   31.11    2.10
  -2   6 -11   10.72    1.25
  -2   6 -11    7.98    1.46
   2   7 -13    6.74    1.45
  -2   7 -11   11.78    1.34
  -2   7 -11   12.64    1.72
   2   8 -13    0.30    0.48
   2   8 -13    1.29    0.95
  -2   8 -11    0.72    0.67
  -2   8 -11   -0.18    0.68
   2   9 -13   21.39    1.63
   2   9 -13   17.88    1.78
  -2   9 -11   12.46    1.37
  -2   9 -11   13.90    1.88
   2  10 -13    6.79    1.11
  -2  10 -11    3.43    0.98
  -2  10 -11    3.37    1.21
   2  11 -13    6.53    1.16
  -2  11 -11   39.19    2.40
  -2  11 -11   39.86    2.52
   2  12 -13   68.20    3.06
  -2  12 -11    1.16    0.82
   2  13 -13    6.25    1.23
  -2  13 -11   65.43    3.21
   2  14 -13   74.73    3.40
  -2  14 -11    1.45    0.89
   2  15 -13    1.41    0.83
  -2  15 -11   19.67    1.94
   2  16 -13    4.81    1.25
  -2  16 -11    2.89    1.11
   2  17 -13    1.16    0.90
  -2  17 -11    2.18    1.02
   2  18 -13   10.40    1.75
  -2  18 -11    0.62    0.81
   2  19 -13    1.04    0.95
  -2  19 -11    7.14    1.59
   2  20 -13   27.58    2.56
  -2  20 -11    0.97    0.94
   4  17  10   13.29    2.11
   4  16  10   14.52    2.11
  -4  16  14    5.81    1.48
   4  15  10   11.59    1.92
  -4  15  14   22.98    2.30
   4  14  10    5.53    1.43
  -4  14  14    1.89    1.06
   4  13  10    3.11    1.15
  -4  13  14    0.82    0.88
   4  12  10   -0.06    0.75
  -4  12  14    0.21    0.71
   4  11  10    0.43    0.82
  -4  11  14   13.67    1.87
   4  10  10    9.04    1.52
  -4  10  14    8.28    1.49
   4   9  10   47.31    2.71
  -4   9  14   20.04    1.95
   4  -9 -14   19.22    2.34
   4   8  10   16.90    1.70
  -4   8  14    9.20    1.56
   4  -8 -14    7.42    1.76
  -4  -8 -10    8.00    1.83
   4   7  10   27.36    2.03
  -4   7  14   25.15    2.08
   4  -7 -14   14.60    1.80
  -4  -7 -10   16.68    1.95
   4   6  10   10.66    1.47
  -4   6  14   44.47    2.64
   4  -6 -14   29.19    2.19
  -4  -6 -10    3.20    1.47
   4   5  10    0.85    0.72
  -4   5  14    2.56    0.96
   4  -5 -14    1.47    1.18
  -4  -5 -10    0.02    1.11
   4   4  10    9.38    1.31
  -4   4  14    0.95    0.76
   4  -4 -14    0.34    1.06
  -4  -4 -10    5.25    1.50
  -4   3  14   39.24    2.36
   4  -3 -14   25.96    2.00
  -4  -3 -10    0.42    0.68
  -4  -3 -10   -0.75    1.00
  -4   2  14    1.13    0.72
   4  -2 -14   -0.41    0.88
  -4  -2 -10   17.61    1.58
  -4  -2 -10    8.50    1.78
  -4   1  14   98.34    3.55
   4  -1 -14   79.12    3.12
  -4  -1 -10   28.64    1.95
  -4  -1 -10   23.21    1.99
  -4   0  14  122.24    3.91
   4   0 -14   97.91    3.42
  -4   0 -10  111.50    3.58
  -4   0 -10   97.65    3.47
  -4  -1  14   93.85    3.41
   4   1 -14   78.89    3.11
  -4   1 -10   27.64    1.97
  -4   1 -10   25.37    2.00
  -4  -2  14    0.30    0.58
   4   2 -14    0.21    0.81
  -4   2 -10   15.96    1.64
  -4   2 -10   12.75    1.57
  -4  -3  14   37.75    2.18
   4   3 -14   32.90    2.16
  -4   3 -10    0.39    0.83
  -4   3 -10    0.77    0.94
  -4  -4  14    0.72    0.64
   4   4 -14    0.58    0.84
  -4   4 -10    4.61    1.15
  -4   4 -10    5.57    1.34
  -4  -5  14    2.72    0.87
   4   5 -14    3.30    1.10
  -4   5 -10    0.73    0.87
  -4   5 -10    1.25    0.97
   4   6 -14   45.10    2.52
  -4   6 -10    7.16    1.39
  -4   6 -10    6.84    1.45
   4   7 -14   22.81    1.91
  -4   7 -10   20.34    1.91
  -4   7 -10   21.97    1.86
   4   8 -14   10.32    1.67
  -4   8 -10   11.80    1.69
  -4   8 -10   13.27    1.58
   4   9 -14   18.37    1.82
  -4   9 -10   32.54    2.34
  -4   9 -10   35.26    2.29
   4  10 -14    8.08    1.59
  -4  10 -10    6.52    1.42
  -4  10 -10    5.60    1.34
   4  11 -14   12.48    1.47
  -4  11 -10    0.11    0.82
  -4  11 -10   -0.14    0.79
   4  12 -14   -0.26    0.54
  -4  12 -10    0.18    0.73
   4  13 -14    2.29    0.91
  -4  13 -10    2.31    1.09
   4  14 -14    1.43    0.90
  -4  14 -10    3.12    1.24
   4  15 -14   23.91    2.19
  -4  15 -10    8.36    1.67
   4  16 -14    6.56    1.47
  -4  16 -10   11.45    1.93
   4  17 -14   30.20    2.55
  -4  17 -10   11.05    1.94
   4  18 -14    4.41    1.37
  -4  18 -10    3.11    1.35
   6  13   9    0.88    1.07
   6  12   9   18.45    2.15
   6  11   9    4.11    1.39
  -6  11  15   21.92    2.30
   6  10   9    4.06    1.32
  -6  10  15    2.75    1.20
   6   9   9    0.17    0.88
  -6   9  15    4.87    1.37
   6   8   9    0.80    0.82
  -6   8  15    0.48    0.84
   6   7   9    3.70    1.18
  -6   7  15    5.22    1.35
   6   6   9   31.59    2.36
  -6   6  15    0.09    0.74
  -6   5  15   35.26    2.61
  -6   4  15    9.90    1.65
  -6  -4  -9    8.79    1.50
  -6   3  15   39.14    2.68
  -6  -3  -9    1.03    0.91
  -6   2  15    4.10    1.19
  -6  -2  -9    5.48    1.32
  -6   1  15   10.29    1.62
  -6  -1  -9    1.15    0.96
  -6   0  15   -0.21    0.62
  -6   0  -9   -0.35    0.77
  -6  -1  15    9.51    1.55
  -6   1  -9    1.07    0.97
  -6  -2  15    3.13    1.06
  -6   2  -9    7.33    1.45
  -6  -3  15   34.82    2.44
  -6   3  -9    2.23    1.14
  -6  -4  15   16.52    1.77
  -6   4  -9    8.36    1.59
  -6  -5  15   42.62    2.69
  -6   5  -9   -0.03    0.90
  -6  -6  15    0.44    0.74
  -6   6  -9   18.40    2.07
  -6  -7  15    6.94    1.39
  -6   7  -9    1.84    1.18
  -6   8  -9   -1.20    0.89
  -6   9  -9    0.40    1.03
  -6  10  -9    2.16    1.29
  -6  11  -9    3.17    1.38
  -6  12  -9   12.39    2.10
  -6  13  -9    0.10    1.07
  -6  14  -9    8.30    1.96
  -8  -1  -8    1.44    1.10
  -8   0  -8    0.40    0.92
  -8   1  -8    2.87    1.24
   1  19  12   13.16    2.07
  -1  19  13    1.37    1.09
   1  18  12    1.04    0.99
  -1  18  13    8.16    1.70
   1  17  12   -0.52    0.71
  -1  17  13   15.72    1.95
   1  16  12    0.73    0.88
  -1  16  13   15.67    1.90
   1  15  12   22.04    2.13
  -1  15  13   19.69    2.05
   1  14  12    0.04    0.74
  -1  14  13    6.59    1.45
   1  13  12   47.48    2.84
  -1  13  13    0.91    0.85
   1  12  12    3.68    1.13
  -1  12  13    0.98    0.85
   1  11  12   91.82    3.68
  -1  11  13   44.69    2.65
   1 -11 -13   30.10    2.44
  -1 -11 -12   64.70    3.32
   1  10  12    1.75    0.82
  -1  10  13   38.82    2.42
   1 -10 -13   19.09    2.05
  -1 -10 -12    0.26    1.18
   1   9  12    6.84    1.23
  -1   9  13   14.91    1.55
   1  -9 -13   11.50    2.02
  -1  -9 -12    2.16    1.38
   1   8  12    1.44    0.77
  -1   8  13    0.78    0.69
   1  -8 -13   -0.34    1.16
  -1  -8 -12   -0.05    1.16
   1   7  12   13.45    1.42
  -1   7  13   89.52    3.32
   1  -7 -13   56.10    2.91
  -1  -7 -12    7.68    1.73
   1   6  12    9.28    1.30
  -1   6  13    0.42    0.65
   1  -6 -13    0.67    1.20
  -1  -6 -12    6.94    1.70
   1   5  12   34.77    1.98
  -1   5  13   22.04    1.65
   1  -5 -13   14.85    2.05
  -1  -5 -12   20.52    1.92
   1   4  12   10.40    1.19
  -1   4  13    2.81    0.80
   1  -4 -13    1.22    1.12
  -1  -4 -12    7.28    1.56
   1   3  12   97.56    3.00
  -1   3  13   46.01    2.16
   1  -3 -13   33.19    2.20
  -1  -3 -12   56.24    2.76
   1   2  12    9.99    1.13
  -1   2  13   63.98    2.46
   1  -2 -13   43.07    2.42
  -1  -2 -12    8.02    1.58
   1   1  12   42.13    1.90
  -1   1  13   92.01    2.85
   1  -1 -13   65.42    2.87
  -1  -1 -12   26.23    1.98
  -1   0  13   38.62    1.87
   1   0 -13   27.24    1.97
  -1   0 -12   -0.08    0.81
   1   1 -13   72.41    3.00
  -1   1 -12   29.11    2.01
   1   2 -13   52.00    2.58
  -1   2 -12    8.64    1.49
   1   3 -13   37.94    2.25
  -1   3 -12   74.90    3.06
   1   4 -13    2.25    0.99
  -1   4 -12    8.40    1.02
  -1   4 -12    7.55    1.41
   1   5 -13   18.66    1.69
  -1   5 -12   34.70    1.83
  -1   5 -12   27.66    1.98
   1   6 -13    0.22    0.76
  -1   6 -12    9.68    1.12
  -1   6 -12    8.62    1.50
   1   7 -13   96.99    3.02
   1   7 -13   77.36    3.26
  -1   7 -12   14.06    1.34
  -1   7 -12   12.21    1.48
   1   8 -13    0.45    0.53
   1   8 -13    0.14    0.74
  -1   8 -12    1.02    0.62
  -1   8 -12    1.28    0.89
   1   9 -13   15.29    1.42
   1   9 -13   14.18    1.59
  -1   9 -12    4.50    0.97
  -1   9 -12    6.17    1.40
   1  10 -13   39.46    2.22
   1  10 -13   32.32    2.28
  -1  10 -12    0.87    0.67
  -1  10 -12    1.54    0.95
   1  11 -13   45.01    2.44
  -1  11 -12   89.44    3.46
  -1  11 -12   86.03    3.63
   1  12 -13    0.32    0.64
  -1  12 -12    4.84    1.09
   1  13 -13    1.14    0.77
  -1  13 -12   49.21    2.75
   1  14 -13    7.88    1.38
  -1  14 -12    0.47    0.72
   1  15 -13   23.17    2.06
  -1  15 -12   19.83    1.92
   1  16 -13   16.84    1.83
  -1  16 -12    0.31    0.68
   1  17 -13   16.65    1.89
  -1  17 -12    0.82    0.77
   1  18 -13    8.38    1.64
  -1  18 -12    0.92    0.82
   1  19 -13    1.87    1.13
  -1  19 -12   15.76    1.93
   1  20 -13   -0.70    0.77
  -1  20 -12    6.52    1.61
   3  17  11    0.46    0.89
  -3  17  14    0.62    0.88
   3  16  11   35.22    2.75
  -3  16  14    0.35    0.77
   3  15  11    6.67    1.53
  -3  15  14    1.76    0.95
   3  14  11   15.80    1.87
  -3  14  14   16.52    1.87
   3  13  11    1.23    0.97
  -3  13  14    0.16    0.68
   3  12  11    0.05    0.75
  -3  12  14   33.19    2.46
   3  11  11    0.90    0.84
  -3  11  14    5.14    1.25
   3  10  11   46.66    2.70
  -3  10  14   17.51    1.81
   3 -10 -14   16.04    2.23
   3   9  11   11.88    1.62
  -3   9  14    3.04    1.01
   3  -9 -14    1.26    1.29
  -3  -9 -11    5.66    1.71
   3   8  11   26.82    1.98
  -3   8  14    1.37    0.86
   3  -8 -14    1.11    1.29
  -3  -8 -11   15.17    1.88
   3   7  11    4.84    1.11
  -3   7  14    1.81    0.82
   3  -7 -14    0.13    1.16
  -3  -7 -11    3.29    1.49
   3   6  11   24.63    1.82
  -3   6  14  101.09    3.72
   3  -6 -14   59.59    2.94
  -3  -6 -11   16.96    1.91
   3   5  11   15.23    1.46
  -3   5  14    0.05    0.61
   3  -5 -14   -0.56    1.01
  -3  -5 -11   11.06    1.89
   3   4  11    5.74    1.06
  -3   4  14  117.97    3.87
   3  -4 -14   77.44    3.23
  -3  -4 -11    3.20    1.42
   3   3  11   22.90    1.62
  -3   3  14    2.87    0.90
   3  -3 -14    2.15    1.24
  -3  -3 -11   13.08    1.96
  -3   2  14   54.95    2.60
   3  -2 -14   38.04    2.35
  -3  -2 -11   28.54    2.14
  -3   1  14   10.65    1.29
   3  -1 -14    9.17    1.63
  -3  -1 -11   13.56    1.91
  -3   0  14   -0.13    0.49
   3   0 -14   -0.25    0.81
  -3   0 -11   51.96    2.31
  -3   0 -11   48.99    2.61
  -3  -1  14    9.05    1.26
   3   1 -14    7.84    1.51
  -3   1 -11   15.09    1.47
  -3   1 -11   14.26    1.61
  -3  -2  14   55.06    2.44
   3   2 -14   42.73    2.42
  -3   2 -11   36.57    2.08
  -3   2 -11   35.78    2.23
  -3  -3  14    2.87    0.82
   3   3 -14    1.17    0.91
  -3   3 -11   16.81    1.56
  -3   3 -11   16.81    1.67
   3   4 -14  100.95    3.60
  -3   4 -11    4.23    1.06
  -3   4 -11    3.59    1.20
   3   5 -14   -0.36    0.69
  -3   5 -11   12.32    1.44
  -3   5 -11   11.11    1.70
   3   6 -14   91.06    3.51
  -3   6 -11   20.26    1.73
  -3   6 -11   19.62    1.77
   3   7 -14    1.78    0.98
  -3   7 -11    4.63    1.09
  -3   7 -11    2.65    1.08
   3   8 -14    2.19    1.10
  -3   8 -11   23.87    1.93
  -3   8 -11   22.29    1.91
   3   9 -14    3.46    1.23
  -3   9 -11    8.23    1.39
  -3   9 -11    9.87    1.62
   3  10 -14   19.63    1.92
  -3  10 -11   40.53    2.51
  -3  10 -11   44.50    2.64
   3  11 -14    7.21    1.25
  -3  11 -11    0.81    0.81
  -3  11 -11    1.31    1.02
   3  12 -14   40.66    2.47
  -3  12 -11    0.23    0.72
  -3  12 -11    0.81    1.00
   3  13 -14    0.45    0.65
  -3  13 -11    0.47    0.81
  -3  13 -11    0.23    0.91
   3  14 -14   19.97    1.90
  -3  14 -11   13.13    1.86
  -3  14 -11   17.86    1.97
   3  15 -14    1.54    0.88
  -3  15 -11    5.28    1.36
   3  16 -14    0.22    0.73
  -3  16 -11   29.05    2.49
   3  17 -14    0.51    0.82
  -3  17 -11    0.82    0.95
   3  18 -14    4.17    1.36
  -3  18 -11    5.08    1.50
   3  19 -14    1.31    1.00
  -3  19 -11   -0.38    0.77
   5  14  10   14.49    2.12
   5  13  10    4.52    1.40
  -5  13  15    2.69    1.22
   5  12  10   17.92    2.01
  -5  12  15    2.33    1.13
   5  11  10    0.08    0.78
  -5  11  15    9.22    1.72
   5  10  10   25.87    2.26
  -5  10  15   19.21    2.06
   5   9  10    0.61    0.87
  -5   9  15   22.19    2.16
   5   8  10    4.55    1.27
  -5   8  15   26.57    2.28
   5   7  10    3.58    1.12
  -5   7  15   16.80    1.85
   5   6  10   13.52    1.58
  -5   6  15   29.97    2.35
  -5   5  15    7.76    1.43
  -5   4  15    1.35    0.84
  -5   3  15    3.85    1.12
  -5  -3 -10    9.10    1.44
  -5   2  15    0.34    0.73
  -5  -2 -10   39.34    2.43
  -5   1  15   13.75    1.75
  -5  -1 -10    7.00    1.35
  -5   0  15   23.20    1.93
  -5   0 -10    0.22    0.81
  -5  -1  15   13.20    1.53
  -5   1 -10    7.11    1.39
  -5  -2  15    0.63    0.76
  -5   2 -10   40.20    2.55
  -5  -3  15    6.20    1.25
  -5   3 -10    8.56    1.51
  -5  -4  15    1.81    0.85
  -5   4 -10   13.39    1.83
  -5  -5  15    9.91    1.48
  -5   5 -10    0.22    0.93
  -5   6 -10    6.16    1.48
  -5   7 -10    2.18    1.16
  -5   8 -10    1.41    1.11
  -5   9 -10   -0.32    0.94
  -5  10 -10   18.17    2.06
  -5  11 -10    0.43    0.98
   5  12 -15    1.94    1.13
  -5  12 -10   11.57    1.87
   5  13 -15    1.00    1.07
  -5  13 -10    4.22    1.43
  -5  14 -10    8.78    1.79
  -5  15 -10    1.79    1.16
  -5  16 -10    1.39    1.15
   7   9   9    5.99    1.55
  -7   4  16    0.34    0.85
  -7  -4  -9    1.13    0.93
  -7   3  16   25.57    2.42
  -7  -3  -9    0.76    0.96
  -7   2  16    2.14    1.09
  -7  -2  -9    0.82    0.99
  -7   1  16    8.30    1.66
  -7  -1  -9    6.69    1.50
  -7   0  16   -0.25    0.72
  -7   0  -9    0.27    0.93
  -7  -1  16    8.50    1.61
  -7   1  -9   10.57    1.82
  -7  -2  16    1.03    0.99
  -7   2  -9    1.17    1.07
  -7  -3  16   22.54    2.18
  -7   3  -9    0.79    1.03
  -7  -4  16    0.91    0.87
  -7   4  -9    2.17    1.18
  -7  -5  16   24.83    2.29
  -7   5  -9    1.15    1.07
  -7  -6  16    0.23    0.77
  -7   6  -9   -0.41    0.94
  -7   7  -9    9.99    1.91
  -7   8  -9   -0.18    0.99
  -7   9  -9    4.34    1.65
   0  18  13    4.49    1.40
   0  17  13   -0.07    0.80
   0  16  13   -0.37    0.74
   0  15  13    3.77    1.24
   0  14  13   25.78    2.26
   0  13  13   15.01    1.76
   0  12  13   13.80    1.70
   0  11  13   66.26    3.21
   0 -11 -13   47.45    2.94
   0  10  13    1.65    0.87
   0 -10 -13    1.19    1.35
   0   9  13    1.71    0.84
   0  -9 -13    1.34    1.34
   0   8  13    3.46    0.95
   0  -8 -13    0.57    1.24
   0   7  13   20.44    1.70
   0  -7 -13   11.58    1.98
   0   6  13   45.95    2.35
   0  -6 -13   25.98    2.19
   0   5  13   45.14    2.26
   0  -5 -13   25.94    2.14
   0   4  13   42.75    2.15
   0  -4 -13   27.10    2.10
   0   3  13   64.96    2.53
   0  -3 -13   39.99    2.41
   0   2  13    4.51    0.92
   0  -2 -13    3.30    1.24
   0   1  13    3.12    0.78
   0  -1 -13    4.00    1.23
   0   0 -13   -0.05    0.79
   0   1 -13    3.92    1.17
   0   2 -13    4.13    1.20
   0   3 -13   51.31    2.63
   0   4 -13   32.54    2.17
   0   5 -13   35.95    2.28
   0   6 -13   35.77    2.30
   0   7 -13   19.39    1.48
   0   7 -13   15.90    1.65
   0   8 -13    3.89    0.88
   0   8 -13    3.04    1.12
   0   9 -13    0.98    0.62
   0   9 -13    1.51    0.98
   0  10 -13    0.73    0.67
   0  10 -13    2.69    1.13
   0  11 -13   67.24    2.99
   0  11 -13   61.27    3.15
   0  12 -13   17.76    1.71
   0  13 -13   16.77    1.70
   0  14 -13   23.57    2.02
   0  15 -13    2.46    1.01
   0  16 -13    0.07    0.64
   0  17 -13   -0.15    0.62
   0  18 -13    2.93    1.14
   0  19 -13   17.50    2.06
   0  20 -13   17.99    2.14
   2  18  12   19.07    2.17
  -2  18  14    1.15    1.03
   2  17  12    0.05    0.80
  -2  17  14   22.38    2.28
   2  16  12   11.41    1.87
  -2  16  14    1.00    0.90
   2  15  12   -0.50    0.71
  -2  15  14   21.99    2.17
   2  14  12   11.55    1.82
  -2  14  14    2.48    1.11
   2  13  12    1.03    0.94
  -2  13  14    2.15    1.03
   2  12  12   -0.26    0.65
  -2  12  14    0.75    0.77
   2  11  12    0.25    0.70
  -2  11  14   22.23    2.01
   2 -11 -14   17.30    2.04
   2  10  12   59.68    2.99
  -2  10  14   13.44    1.60
   2 -10 -14    9.95    2.02
  -2 -10 -12   39.49    2.73
   2   9  12    1.36    0.83
  -2   9  14   80.05    3.45
   2  -9 -14   52.30    2.98
  -2  -9 -12    0.31    1.31
   2   8  12  118.82    3.95
  -2   8  14    2.41    0.88
   2  -8 -14    3.24    1.50
  -2  -8 -12   71.41    3.38
   2   7  12    1.76    0.82
  -2   7  14  107.67    3.78
   2  -7 -14   64.16    3.12
  -2  -7 -12    0.83    1.31
   2   6  12   55.79    2.60
  -2   6  14   37.61    2.24
   2  -6 -14   22.03    2.02
  -2  -6 -12   29.30    2.29
   2   5  12    9.28    1.29
  -2   5  14    1.24    0.73
   2  -5 -14    1.36    1.25
  -2  -5 -12    5.37    1.60
   2   4  12    2.31    0.79
  -2   4  14    3.16    0.89
   2  -4 -14    1.14    1.14
  -2  -4 -12    0.22    1.21
   2   3  12    0.53    0.57
  -2   3  14   29.65    1.93
   2  -3 -14   21.10    1.92
  -2  -3 -12    0.36    1.06
  -2   2  14    4.94    1.04
   2  -2 -14    3.65    1.38
  -2  -2 -12   16.83    1.74
  -2   1  14   60.47    2.56
   2  -1 -14   39.28    2.39
  -2  -1 -12    5.83    1.48
  -2   0  14    9.50    1.18
   2   0 -14    7.88    1.56
  -2   0 -12   68.12    3.00
  -2  -1  14   62.92    2.49
   2   1 -14   45.30    2.51
  -2   1 -12    7.48    1.52
   2   2 -14    4.41    1.27
  -2   2 -12   18.57    1.73
   2   3 -14   24.15    1.94
  -2   3 -12   -0.74    0.71
   2   4 -14    2.51    1.06
  -2   4 -12    1.73    0.77
  -2   4 -12    1.58    1.03
   2   5 -14    1.08    0.95
  -2   5 -12    7.85    1.16
  -2   5 -12    7.50    1.46
   2   6 -14   33.23    2.25
  -2   6 -12   48.17    2.36
  -2   6 -12   45.00    2.54
   2   7 -14   94.13    3.67
  -2   7 -12    0.92    0.68
  -2   7 -12    1.35    0.96
   2   8 -14    2.23    1.18
  -2   8 -12  105.14    3.61
  -2   8 -12   99.02    3.75
   2   9 -14   74.20    3.39
  -2   9 -12    1.19    0.82
  -2   9 -12    1.03    0.96
   2  10 -14   11.96    1.86
  -2  10 -12   54.52    2.79
  -2  10 -12   49.80    2.82
   2  11 -14   26.58    1.96
   2  11 -14   21.46    2.05
  -2  11 -12   -0.77    0.53
  -2  11 -12    0.12    0.81
   2  12 -14   -0.08    0.54
  -2  12 -12   -0.11    0.56
  -2  12 -12   -0.25    0.86
   2  13 -14    1.64    0.82
  -2  13 -12    0.97    0.79
  -2  13 -12    1.01    1.00
   2  14 -14    3.71    1.11
  -2  14 -12    8.80    1.53
   2  15 -14   26.03    2.20
  -2  15 -12    0.44    0.76
   2  16 -14    0.69    0.79
  -2  16 -12    8.33    1.61
   2  17 -14   26.51    2.36
  -2  17 -12    0.41    0.78
   2  18 -14    0.72    0.91
  -2  18 -12   17.22    2.05
   2  19 -14    4.73    1.42
  -2  19 -12    0.24    0.79
   4  16  11   -0.69    0.84
   4  15  11    0.11    0.84
  -4  15  15    1.59    1.04
   4  14  11   15.49    1.93
  -4  14  15    6.50    1.49
   4  13  11    5.19    1.38
  -4  13  15    9.67    1.72
   4  12  11    7.91    1.58
  -4  12  15   13.48    1.96
   4  11  11   10.89    1.73
  -4  11  15    2.65    1.12
   4  10  11    7.39    1.46
  -4  10  15   10.36    1.70
   4   9  11    1.25    0.89
  -4   9  15    0.44    0.76
   4  -9 -15   -0.49    1.15
   4   8  11   11.95    1.65
  -4   8  15    4.92    1.29
   4  -8 -15    3.78    1.51
  -4  -8 -11    4.06    1.62
   4   7  11   20.04    1.83
  -4   7  15    3.92    1.16
   4  -7 -15    0.68    1.30
  -4  -7 -11    8.81    1.87
   4   6  11   18.63    1.74
  -4   6  15   42.56    2.66
   4  -6 -15   26.26    2.20
  -4  -6 -11    5.65    1.67
   4   5  11   48.78    2.54
  -4   5  15   36.62    2.45
   4  -5 -15   22.64    2.11
  -4  -5 -11   25.75    2.24
  -4   4  15   76.92    3.39
   4  -4 -15   52.15    2.82
  -4  -4 -11    9.59    1.88
  -4   3  15    2.47    0.94
   4  -3 -15    0.41    1.15
  -4  -3 -11   28.97    2.26
  -4   2  15   38.92    2.39
   4  -2 -15   29.04    2.22
  -4  -2 -11    3.59    1.44
  -4   1  15    2.66    0.91
   4  -1 -15    0.99    1.09
  -4  -1 -11   -0.19    1.06
  -4   0  15   -0.11    0.57
   4   0 -15   -0.92    0.86
  -4   0 -11   -0.59    0.59
  -4   0 -11   -0.24    0.97
  -4  -1  15    3.18    0.98
   4   1 -15    2.00    1.17
  -4   1 -11   -0.35    0.66
  -4   1 -11   -0.44    0.96
  -4  -2  15   41.23    2.34
   4   2 -15   35.26    2.33
  -4   2 -11    5.83    1.22
  -4   2 -11    3.60    1.32
  -4  -3  15    2.26    0.88
   4   3 -15    2.76    1.22
  -4   3 -11   34.46    2.28
  -4   3 -11   31.31    2.22
  -4  -4  15   79.61    3.15
   4   4 -15   71.88    3.20
  -4   4 -11   15.21    1.69
  -4   4 -11    9.42    1.66
   4   5 -15   30.39    2.20
  -4   5 -11   33.24    2.31
  -4   5 -11   33.70    2.27
   4   6 -15   38.06    2.43
  -4   6 -11   12.51    1.71
  -4   6 -11    5.80    1.38
   4   7 -15    3.31    1.22
  -4   7 -11   13.89    1.68
  -4   7 -11   13.69    1.65
   4   8 -15    4.25    1.31
  -4   8 -11    8.90    1.51
  -4   8 -11    7.47    1.53
   4   9 -15    1.19    0.98
  -4   9 -11    1.63    1.02
  -4   9 -11    0.98    1.00
   4  10 -15   11.36    1.80
  -4  10 -11    4.48    1.24
  -4  10 -11    3.63    1.26
   4  11 -15    2.75    1.21
  -4  11 -11    7.48    1.47
  -4  11 -11    8.44    1.67
   4  12 -15    7.63    1.66
  -4  12 -11    7.00    1.52
  -4  13 -11    3.79    1.31
  -4  14 -11   11.97    1.89
   4  15 -15    3.11    1.13
  -4  15 -11    0.06    0.86
   4  16 -15    0.28    0.77
  -4  16 -11   -0.35    0.75
   4  17 -15    0.87    0.91
  -4  17 -11    0.43    0.97
   6  12  10    0.67    1.11
   6  11  10    2.26    1.19
   6  10  10    1.95    1.14
   6   9  10   17.45    2.03
  -6   9  16    1.32    1.03
   6   8  10    2.42    1.14
  -6   8  16   31.15    2.62
  -6   7  16    5.69    1.45
  -6   6  16    9.27    1.69
  -6   5  16    3.70    1.23
  -6   4  16    0.89    0.84
  -6   3  16    2.85    1.07
  -6  -3 -10    0.67    0.86
  -6   2  16   16.26    1.85
  -6  -2 -10    0.26    0.77
  -6   1  16   -0.31    0.65
  -6  -1 -10    7.68    1.47
  -6   0  16   37.71    2.64
  -6   0 -10   -0.02    0.80
  -6  -1  16    0.79    0.79
  -6   1 -10   11.73    1.78
  -6  -2  16   16.94    1.83
  -6   2 -10    0.31    0.89
  -6  -3  16    3.80    1.11
  -6   3 -10    0.99    1.03
  -6  -4  16    1.08    0.89
  -6   4 -10    0.58    1.00
  -6  -5  16    6.36    1.36
  -6   5 -10   -0.44    0.85
  -6   6 -10    0.02    1.04
  -6   7 -10    7.32    1.70
  -6   8 -10    1.55    1.19
  -6   9 -10    8.14    1.81
  -6  10 -10    1.09    1.21
  -6  11 -10    1.54    1.34
  -6  12 -10   -0.59    1.03
   1  18  13   28.90    2.63
  -1  18  14    0.77    1.03
   1  17  13    1.01    1.01
  -1  17  14    0.05    0.86
   1  16  13   23.33    2.29
  -1  16  14    3.51    1.27
   1  15  13   19.07    2.05
  -1  15  14    0.42    0.88
   1  14  13   19.09    2.00
  -1  14  14   36.95    2.67
   1  13  13    0.91    0.87
  -1  13  14   10.93    1.70
   1  12  13    1.91    1.00
  -1  12  14   55.13    3.08
   1  11  13    0.46    0.76
  -1  11  14   25.33    2.12
   1 -11 -14   19.43    2.60
  -1 -11 -13   -0.02    1.29
   1  10  13   30.46    2.23
  -1  10  14   33.25    2.32
   1 -10 -14   21.65    2.20
  -1 -10 -13   20.12    2.17
   1   9  13   -0.08    0.62
  -1   9  14    8.74    1.43
   1  -9 -14    5.07    1.69
  -1  -9 -13   -0.50    1.16
   1   8  13   54.20    2.74
  -1   8  14    8.18    1.35
   1  -8 -14    5.80    1.67
  -1  -8 -13   32.48    2.44
   1   7  13   15.77    1.57
  -1   7  14    0.30    0.64
   1  -7 -14   -1.60    0.96
  -1  -7 -13    9.83    1.95
   1   6  13   42.48    2.32
  -1   6  14   18.56    1.62
   1  -6 -14   12.28    2.04
  -1  -6 -13   21.94    2.09
   1   5  13    0.38    0.63
  -1   5  14   24.84    1.81
   1  -5 -14   16.56    1.86
  -1  -5 -13   -0.45    1.09
   1   4  13    6.25    1.08
  -1   4  14  109.82    3.51
   1  -4 -14   64.97    3.09
  -1  -4 -13    4.36    1.48
   1   3  13    5.30    1.00
  -1   3  14   31.99    1.92
   1  -3 -14   23.73    2.03
  -1  -3 -13    2.68    1.26
  -1   2  14   59.72    2.48
   1  -2 -14   36.97    2.40
  -1  -2 -13   18.91    1.84
  -1   1  14    0.80    0.62
   1  -1 -14   -0.12    0.93
  -1  -1 -13   19.90    1.86
  -1   0  14   -0.60    0.44
   1   0 -14    0.35    0.99
  -1   0 -13   57.22    2.84
   1   1 -14   -0.58    0.83
  -1   1 -13   19.28    1.80
   1   2 -14   45.14    2.56
  -1   2 -13   26.25    2.02
   1   3 -14   26.11    2.04
  -1   3 -13    3.86    1.22
   1   4 -14   91.22    3.55
  -1   4 -13    4.03    1.21
   1   5 -14   22.03    1.90
  -1   5 -13   -0.07    0.78
   1   6 -14   14.05    1.61
  -1   6 -13   33.71    2.28
   1   7 -14    0.18    0.83
  -1   7 -13   15.23    1.42
  -1   7 -13   13.68    1.60
   1   8 -14    5.57    1.39
  -1   8 -13   49.94    2.44
  -1   8 -13   44.37    2.62
   1   9 -14    6.81    1.56
  -1   9 -13    0.60    0.65
  -1   9 -13   -0.05    0.91
   1  10 -14   32.78    2.07
   1  10 -14   26.86    2.22
  -1  10 -13   31.49    2.12
  -1  10 -13   25.11    2.13
   1  11 -14   28.49    2.03
   1  11 -14   22.06    2.08
  -1  11 -13    1.03    0.75
  -1  11 -13    0.85    0.95
   1  12 -14   59.28    2.93
   1  12 -14   53.64    3.10
  -1  12 -13    2.56    0.98
  -1  12 -13    2.77    1.22
   1  13 -14   12.26    1.64
  -1  13 -13    2.00    0.95
  -1  13 -13    1.74    1.12
   1  14 -14   31.56    2.32
  -1  14 -13   19.34    1.93
   1  15 -14    0.12    0.69
  -1  15 -13   21.11    2.03
   1  16 -14    3.35    1.19
  -1  16 -13   21.68    2.09
   1  17 -14    0.70    0.85
  -1  17 -13    0.92    0.90
   1  18 -14    1.50    1.01
  -1  18 -13   30.41    2.60
   1  19 -14    3.61    1.32
  -1  19 -13    1.22    0.99
   3  16  12   -0.51    0.76
  -3  16  15    4.99    1.41
   3  15  12    3.15    1.26
  -3  15  15   26.89    2.44
   3  14  12    1.38    1.04
  -3  14  15    0.87    0.90
   3  13  12   36.53    2.68
  -3  13  15    1.24    0.92
   3  12  12    2.04    1.00
  -3  12  15    1.50    0.96
   3  11  12   32.87    2.44
  -3  11  15   10.95    1.73
   3 -11 -15   10.66    2.04
   3  10  12   13.41    1.64
  -3  10  15    1.41    0.92
   3 -10 -15    0.45    1.26
  -3 -10 -12    9.19    1.99
   3   9  12   -0.12    0.69
  -3   9  15   41.29    2.64
   3  -9 -15   31.20    2.49
  -3  -9 -12    0.11    1.32
   3   8  12    0.34    0.68
  -3   8  15   -0.02    0.66
   3  -8 -15   -1.72    1.02
  -3  -8 -12   -0.02    1.20
   3   7  12   16.29    1.62
  -3   7  15   47.46    2.73
   3  -7 -15   29.74    2.37
  -3  -7 -12    4.48    1.63
   3   6  12    5.99    1.16
  -3   6  15   -0.07    0.65
   3  -6 -15   -0.21    1.13
  -3  -6 -12    2.11    1.43
   3   5  12   36.50    2.16
  -3   5  15   12.00    1.49
   3  -5 -15    8.58    1.78
  -3  -5 -12   18.59    2.02
  -3   4  15    0.46    0.72
   3  -4 -15   -1.38    0.93
  -3  -4 -12    8.80    1.85
  -3   3  15   14.23    1.52
   3  -3 -15    8.47    1.72
  -3  -3 -12   23.08    2.08
  -3   2  15    5.82    1.16
   3  -2 -15    5.40    1.52
  -3  -2 -12    1.19    1.22
  -3   1  15  104.69    3.58
   3  -1 -15   77.35    3.32
  -3  -1 -12    5.61    1.52
  -3   0  15   14.64    1.47
   3   0 -15   11.80    1.84
  -3   0 -12   -1.01    0.85
  -3  -1  15  103.17    3.44
   3   1 -15   83.87    3.41
  -3   1 -12    7.37    1.58
  -3  -2  15    6.44    1.12
   3   2 -15    3.57    1.26
  -3   2 -12    1.36    1.08
   3   3 -15   10.24    1.69
  -3   3 -12   32.57    2.06
  -3   3 -12   33.22    2.26
   3   4 -15   -0.20    0.81
  -3   4 -12   10.82    1.45
  -3   4 -12    9.44    1.67
   3   5 -15   11.72    1.75
  -3   5 -12   26.09    1.96
  -3   5 -12   27.10    2.12
   3   6 -15    0.21    0.83
  -3   6 -12    3.05    1.00
  -3   6 -12    2.19    1.08
   3   7 -15   44.21    2.65
  -3   7 -12   12.57    1.52
  -3   7 -12   13.57    1.62
   3   8 -15    0.54    0.89
  -3   8 -12   -0.12    0.66
  -3   8 -12    0.32    0.82
   3   9 -15   42.17    2.69
  -3   9 -12    0.76    0.80
  -3   9 -12   -0.58    0.76
   3  10 -15    1.01    1.04
  -3  10 -12   11.41    1.60
  -3  10 -12   11.27    1.79
   3  11 -15   11.18    1.87
  -3  11 -12   25.41    2.16
  -3  11 -12   28.75    2.29
   3  12 -15    0.79    0.98
  -3  12 -12    2.33    1.08
  -3  12 -12    2.35    1.22
  -3  13 -12   33.77    2.56
  -3  13 -12   36.52    2.65
  -3  14 -12    1.95    1.03
  -3  14 -12    2.11    1.27
   3  15 -15   33.30    2.54
  -3  15 -12    2.80    1.20
  -3  15 -12    4.45    1.49
   3  16 -15    9.11    1.65
  -3  16 -12    0.35    0.85
  -3  16 -12    0.16    0.98
   3  17 -15   22.22    2.28
  -3  17 -12    0.23    1.00
  -3  17 -12    0.99    1.10
  -3  18 -12    2.09    1.25
   5  13  11    0.30    0.94
   5  12  11    0.70    1.01
  -5  12  16   24.14    2.43
   5  11  11    2.52    1.17
  -5  11  16   19.46    2.16
   5  10  11    3.25    1.22
  -5  10  16   11.83    1.94
   5   9  11   30.47    2.39
  -5   9  16    4.02    1.32
   5   8  11    6.55    1.40
  -5   8  16    1.38    0.94
   5   7  11   46.01    2.77
  -5   7  16    0.15    0.69
  -5   6  16    3.38    1.14
  -5   5  16   20.18    2.01
  -5   4  16   30.24    2.35
  -5   3  16   17.86    1.84
  -5   2  16    1.17    0.85
  -5   1  16   11.20    1.62
  -5   0  16   -0.14    0.56
  -5   0 -11    8.10    1.45
  -5  -1  16   10.20    1.53
  -5   1 -11    5.78    1.29
  -5  -2  16    2.26    0.95
  -5   2 -11    2.31    1.08
  -5  -3  16   23.73    1.97
  -5   3 -11    1.85    1.04
  -5  -4  16   34.22    2.32
  -5   4 -11   -0.17    0.94
  -5   5 -11   11.74    1.79
  -5   6 -11    3.27    1.30
  -5   7 -11   25.39    2.34
  -5   8 -11    3.85    1.42
  -5   9 -11   16.93    2.07
  -5  10 -11    2.45    1.29
  -5  11 -11    2.07    1.23
  -5  12 -11    0.03    0.98
  -5  13 -11    0.14    0.99
  -5  14 -11    1.30    1.26
  -7  -2 -10    2.40    1.19
  -7   1  17    0.27    0.90
  -7  -1 -10    0.10    0.83
  -7   0  17   53.57    3.37
  -7   0 -10    0.42    0.98
  -7  -1  17    0.30    0.81
  -7   1 -10    0.05    0.92
  -7  -2  17   18.43    2.09
  -7   2 -10    2.85    1.31
  -7  -3  17    0.08    0.77
  -7   3 -10    1.12    1.14
  -7  -4  17    0.04    0.85
  -7   4 -10    4.99    1.48
  -7  -5  17    0.61    0.89
  -7   5 -10    0.58    1.06
  -7   6 -10    4.30    1.53
   0  17  14   10.03    1.85
   0  16  14   17.58    2.06
   0  15  14    8.00    1.63
   0  14  14    6.85    1.53
   0  13  14    1.33    0.96
   0  12  14    0.82    0.82
   0  11  14    0.01    0.70
   0 -11 -14    0.09    1.29
   0  10  14   19.36    1.87
   0 -10 -14   12.88    2.27
   0   9  14   24.42    1.99
   0  -9 -14   13.71    2.27
   0   8  14   17.84    1.71
   0  -8 -14   11.76    2.08
   0   7  14   18.85    1.70
   0  -7 -14   10.55    1.97
   0   6  14    6.63    1.20
   0  -6 -14    6.86    1.78
   0   5  14    0.44    0.63
   0  -5 -14   -0.05    1.08
   0   4  14    1.93    0.76
   0  -4 -14    1.81    1.22
   0   3  14   13.29    1.33
   0  -3 -14    7.75    1.65
   0   2  14   65.16    2.54
   0  -2 -14   39.41    2.51
   0  -1 -14   45.61    2.63
   0   0 -14   32.66    2.27
   0   1 -14   51.98    2.78
   0   2 -14   49.94    2.71
   0   3 -14   10.15    1.67
   0   4 -14    1.45    0.90
   0   5 -14    0.85    0.85
   0   6 -14    6.12    1.42
   0   7 -14   16.86    1.77
   0   8 -14   14.34    1.99
   0   9 -14   21.99    2.00
   0  10 -14   21.21    1.74
   0  10 -14   17.30    1.86
   0  11 -14    1.32    0.79
   0  11 -14   -0.08    0.80
   0  12 -14   -0.30    0.59
   0  12 -14    0.19    0.88
   0  13 -14   -0.08    0.67
   0  13 -14    1.42    1.04
   0  14 -14    5.62    1.25
   0  15 -14    7.20    1.47
   0  16 -14   15.30    1.84
   0  17 -14   10.22    1.75
   0  18 -14   10.79    1.84
   0  19 -14    4.15    1.35
   2  17  13    0.25    0.85
   2  16  13    2.46    1.20
  -2  16  15    0.95    0.99
   2  15  13    5.65    1.44
  -2  15  15   -0.25    0.74
   2  14  13    1.65    1.02
  -2  14  15   27.73    2.43
   2  13  13   76.49    3.74
  -2  13  15    1.10    0.95
   2  12  13    2.51    1.06
  -2  12  15   54.40    3.15
   2  11  13   83.35    3.71
  -2  11  15    0.63    0.82
   2 -11 -15    0.69    1.35
  -2 -11 -13   49.01    3.12
   2  10  13    4.54    1.18
  -2  10  15   20.31    1.94
   2 -10 -15   17.71    2.43
  -2 -10 -13    1.61    1.59
   2   9  13   12.64    1.67
  -2   9  15   14.34    1.64
   2  -9 -15   14.19    2.27
  -2  -9 -13    6.06    1.78
   2   8  13    4.01    1.05
  -2   8  15    6.93    1.32
   2  -8 -15    1.89    1.43
  -2  -8 -13    1.86    1.42
   2   7  13    1.77    0.84
  -2   7  15    5.97    1.22
   2  -7 -15    4.42    1.56
  -2  -7 -13    1.12    1.35
   2   6  13    1.57    0.73
  -2   6  15   64.71    3.01
   2  -6 -15   40.79    2.67
  -2  -6 -13   -0.64    1.17
   2   5  13   59.04    2.67
  -2   5  15    1.14    0.76
   2  -5 -15    1.00    1.29
  -2  -5 -13   31.99    2.44
   2   4  13    1.42    0.74
  -2   4  15   73.60    3.06
   2  -4 -15   49.41    2.81
  -2  -4 -13    0.43    1.21
  -2   3  15    4.24    0.99
   2  -3 -15    3.03    1.34
  -2  -3 -13   25.18    2.15
  -2   2  15   19.01    1.61
   2  -2 -15   15.74    2.10
  -2  -2 -13    0.35    0.99
  -2   1  15    0.51    0.60
   2  -1 -15    1.06    1.05
  -2  -1 -13    6.42    1.56
  -2   0  15    0.44    0.62
   2   0 -15   -0.07    0.92
  -2   0 -13   -0.01    0.92
   2   1 -15   -0.38    0.82
  -2   1 -13    7.70    1.59
   2   2 -15   14.34    1.66
  -2   2 -13   -0.16    0.82
   2   3 -15    2.91    1.23
  -2   3 -13   30.96    2.22
   2   4 -15   63.51    3.08
  -2   4 -13   -0.19    0.87
   2   5 -15    1.02    1.01
  -2   5 -13   42.41    2.56
   2   6 -15   55.66    2.95
  -2   6 -13    0.33    0.92
   2   7 -15    7.72    1.63
  -2   7 -13    0.30    0.64
  -2   7 -13    1.38    1.03
   2   8 -15    6.18    1.53
  -2   8 -13    4.10    1.07
  -2   8 -13    2.68    1.14
   2   9 -15   14.08    1.72
  -2   9 -13    7.69    1.33
  -2   9 -13   10.27    1.80
   2  10 -15   17.97    1.93
  -2  10 -13    3.10    1.10
  -2  10 -13    2.90    1.30
   2  11 -15   -0.07    0.92
  -2  11 -13   75.67    3.41
  -2  11 -13   69.14    3.45
   2  12 -15   54.45    3.20
  -2  12 -13    3.14    1.08
  -2  12 -13    1.70    1.26
   2  13 -15    1.55    1.13
  -2  13 -13   70.56    3.49
  -2  13 -13   66.50    3.51
   2  14 -15   28.36    2.27
  -2  14 -13    1.88    1.01
  -2  14 -13    2.68    1.30
   2  15 -15   -0.19    0.69
  -2  15 -13    6.74    1.49
  -2  15 -13    3.42    1.37
   2  16 -15    0.08    0.74
  -2  16 -13    0.52    0.86
  -2  16 -13    1.32    1.07
   2  17 -15   -0.30    0.70
  -2  17 -13    0.05    0.83
   2  18 -15    9.37    1.76
  -2  18 -13    0.56    1.01
   4  14  12    3.81    1.39
   4  13  12   -0.01    0.88
[truncated: 45,920 more chars]
