# Supplementary material
Source: MDPI journal article supplement (https://www.mdpi.com/2073-4352/8/6/236)
Supplement: s1 [file s1 › Supplementary Materials.doc]

Coordination Behavior of Bis-imidazole and Various Carboxylate Ligands Towards Zn(II) and Cd(II) Ions: Synthesis, Structure, and Photoluminescence Study

Kang Liu, Liming Deng, Yaowen Zhang, Shaoshao Jiao, Yanling Geng and Lei Wang*

**Table S1.** Selected bond distances (Å) and angles (°) for **1**

| Zn1-O11 | 2.566(4) | Zn1-O1 | 2.195(4) |
| --- | --- | --- | --- |
| Zn1-O21 | 2.241(4) | Zn1-O3 | 2.399(4) |
| Zn1-O4 | 2.247(5) | Zn1-N8 | 2.216(5) |
| Zn1-N9 | 2.186(5) |  |  |
| O1-Zn1-O11 | 75.20(15) | O21-Zn1-O3 | 83.51(15) |
| O1-Zn1-O21 | 128.58(16) | O21-Zn1-O4 | 138.91(16) |
| O1-Zn1-O3 | 147.84(16) | O3-Zn1-O11 | 136.95(14) |
| O1-Zn1-O4 | 91.78(16) | O4-Zn1-O11 | 166.12(16) |
| O1-Zn1-N8 | 88.22(18) | O4-Zn1-O3 | 56.14(16) |
| O21-Zn1-O11 | 53.48(13) | N8-Zn1-O11 | 87.95(16) |

Symmetry transformations used to generate equivalent atoms: 1-X, -Y, -Z

**Table S2.** Selected bond distances (Å) and angles (°) for **2**

| Cd1-O8 | 2.437(5) | Cd1-O7 | 2.495(5) |
| --- | --- | --- | --- |
| Cd1-O5 | 2.385(5) | Cd1-O4 | 2.794(6) |
| Cd1-O6 | 2.399(5) | Cd1-N1 | 2.203(7) |
| Cd1-N8 | 2.229(7) | Cd2-O8 | 2.380(5) |
| Cd2-O101 | 2.352(5) | Cd2-O7 | 2.461(5) |
| Cd2-O111 | 2.437(5) | Cd2-O9 | 2.458(5) |
| Cd2-N5 | 2.310(7) | Cd2-N4 | 2.203(7) |
| O8-Cd1-O7 | 74.93(17) | O8-Cd1-O4 | 93.51(16) |
| O7-Cd1-O4 | 168.41(17) | O5-Cd1-O8 | 143.19(17) |
| O5-Cd1-O7 | 141.73(17) | O5-Cd1-O4 | 49.77(17) |
| O5-Cd1-O6 | 88.66(18) | O6-Cd1-O8 | 127.83(17) |
| O6-Cd1-O7 | 53.07(17) | O6-Cd1-O4 | 138.37(18) |
| N1-Cd1-O8 | 87.8(2) | N1-Cd1-O7 | 91.1(2) |
| N1-Cd1-O5 | 88.1(2) | N1-Cd1-O4 | 87.6(2) |
| N1-Cd1-O6 | 89.1(2) | N1-Cd1-N8 | 171.6(3) |
| N8-Cd1-O8 | 88.4(2) | N8-Cd1-O7 | 95.1(3) |
| N8-Cd1-O5 | 90.5(3) | N8-Cd1-O4 | 85.2(3) |
| N8-Cd1-O6 | 99.1(3) | O8-Cd2-O7 | 76.55(18) |
| O8-Cd2-O111 | 139.34(17) | O8-Cd2-O9 | 54.13(17) |
| O101-Cd2-O8 | 165.45(19) | O101-Cd2-O7 | 89.56(18) |
| O101-Cd2-O111 | 54.07(18) | O101-Cd2-O9 | 138.96(19) |
| O111-Cd2-O7 | 143.50(17) | O111-Cd2-O9 | 85.24(17) |
| O9-Cd2-O7 | 130.40(18) | N5-Cd2-O8 | 86.5(2) |
| N5-Cd2-O101 | 88.3(2) | N5-Cd2-O7 | 86.4(2) |
| N5-Cd2-O111 | 89.3(2) | N5-Cd2-O9 | 85.8(2) |
| N4-Cd2-O8 | 88.0(2) | N4-Cd2-O101 | 95.4(2) |
| N4-Cd2-O7 | 86.2(2) | N4-Cd2-O111 | 99.0(2) |
| N4-Cd2-O9 | 96.1(2) | N4-Cd2-N5 | 171.6(3) |

Symmetry transformations used to generate equivalent atoms: 1-1-X, 1/2+Y, -1/2-Z

**Table S3.** Selected bond distances (Å) and angles (°) for **3**

| Zn1-O3 | 2.002(2) | Zn1-O1 | 2.005(2) |
| --- | --- | --- | --- |
| Zn1-O10 | 1.967(3) | Zn1-N1 | 1.996(3) |
| Zn2-O2 | 2.011(2) | Zn2-O5 | 1.928(2) |
| Zn2-N4 | 1.980(3) | Zn2-O4 | 1.973(2) |
| O3-Zn1-O1 | 97.92(10) | O10-Zn1-O3 | 107.29(11) |
| O10-Zn1-O1 | 108.61(11) | O10-Zn1-N1 | 122.86(13) |
| N1-Zn1-O3 | 111.09(11) | N1-Zn1-O1 | 106.19(12) |
| O5-Zn2-O2 | 97.64(11) | O5-Zn2-N4 | 132.00(12) |
| O5-Zn2-O4 | 110.80(12) | N4-Zn2-O2 | 94.98(11) |
| O4-Zn2-O2 | 102.33(10) | O4-Zn2-N4 | 111.30(10) |

**Table S4.** Selected bond distances (Å) and angles (°) for **4**

| Cd1-O5 | 2.160(3) | Cd1-O1 | 2.343(3) |
| --- | --- | --- | --- |
| Cd1-O2 | 2.365(3) | Cd1-N1 | 2.196(3) |
| Cd1-N3 | 2.207(3) |  |  |
| O5-Cd1-O1 | 150.35(10) | O5-Cd1-O2 | 96.13(10) |
| O5-Cd1-N1 | 94.56(11) | O5-Cd1-N3 | 106.76(11) |
| O1-Cd1-O2 | 54.41(9) | N1-Cd1-O1 | 95.46(10) |
| N1-Cd1-O2 | 114.69(10) | N1-Cd1-N3 | 120.19(13) |
| N3-Cd1-O1 | 92.01(10) | N3-Cd1-O2 | 117.45(11) |





**Figure S1.** The PXRD data of **1.**





**Figure S2.** The PXRD data of **2.**





**Figure S3.** The PXRD data of **3.**





**Figure S4.** The PXRD data of **4.**
